# Supplementary material for: Denoising inferred functional association networks obtained by gene fusion analysis
Source: PubMed Central journal article supplement (PMC2248599; doi:10.1186/1471-2164-8-460), 2007-12-14

# HINF-KW2-01 (*Haemophilus influenzae*)

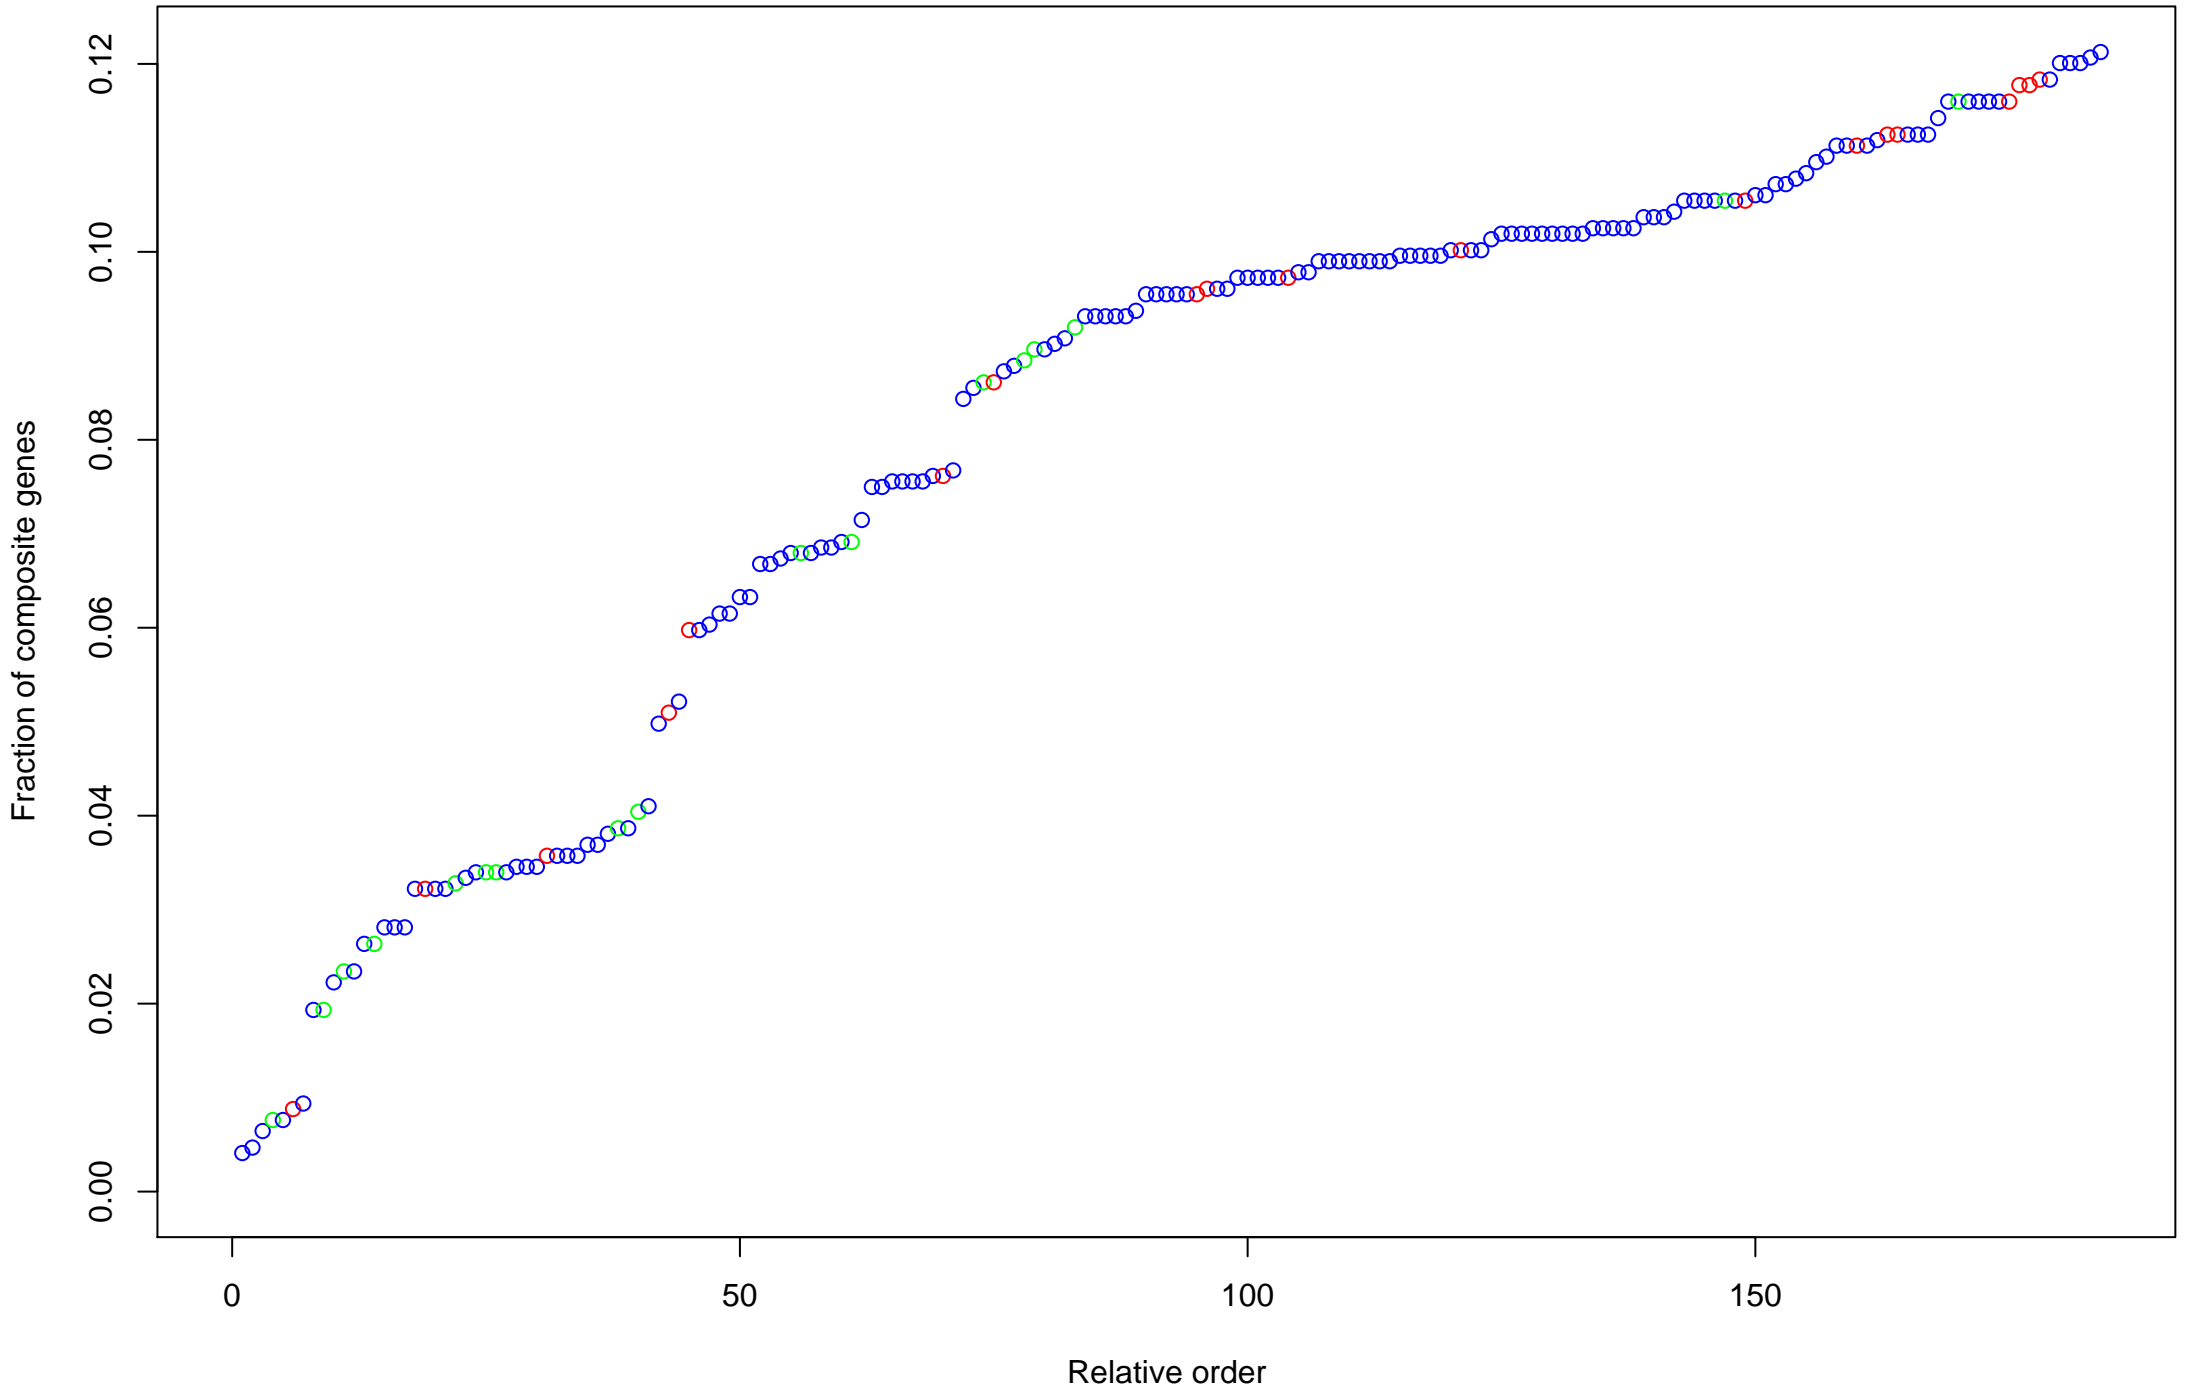

# MGEN-G37-01 (*Mycoplasma genitalium*)

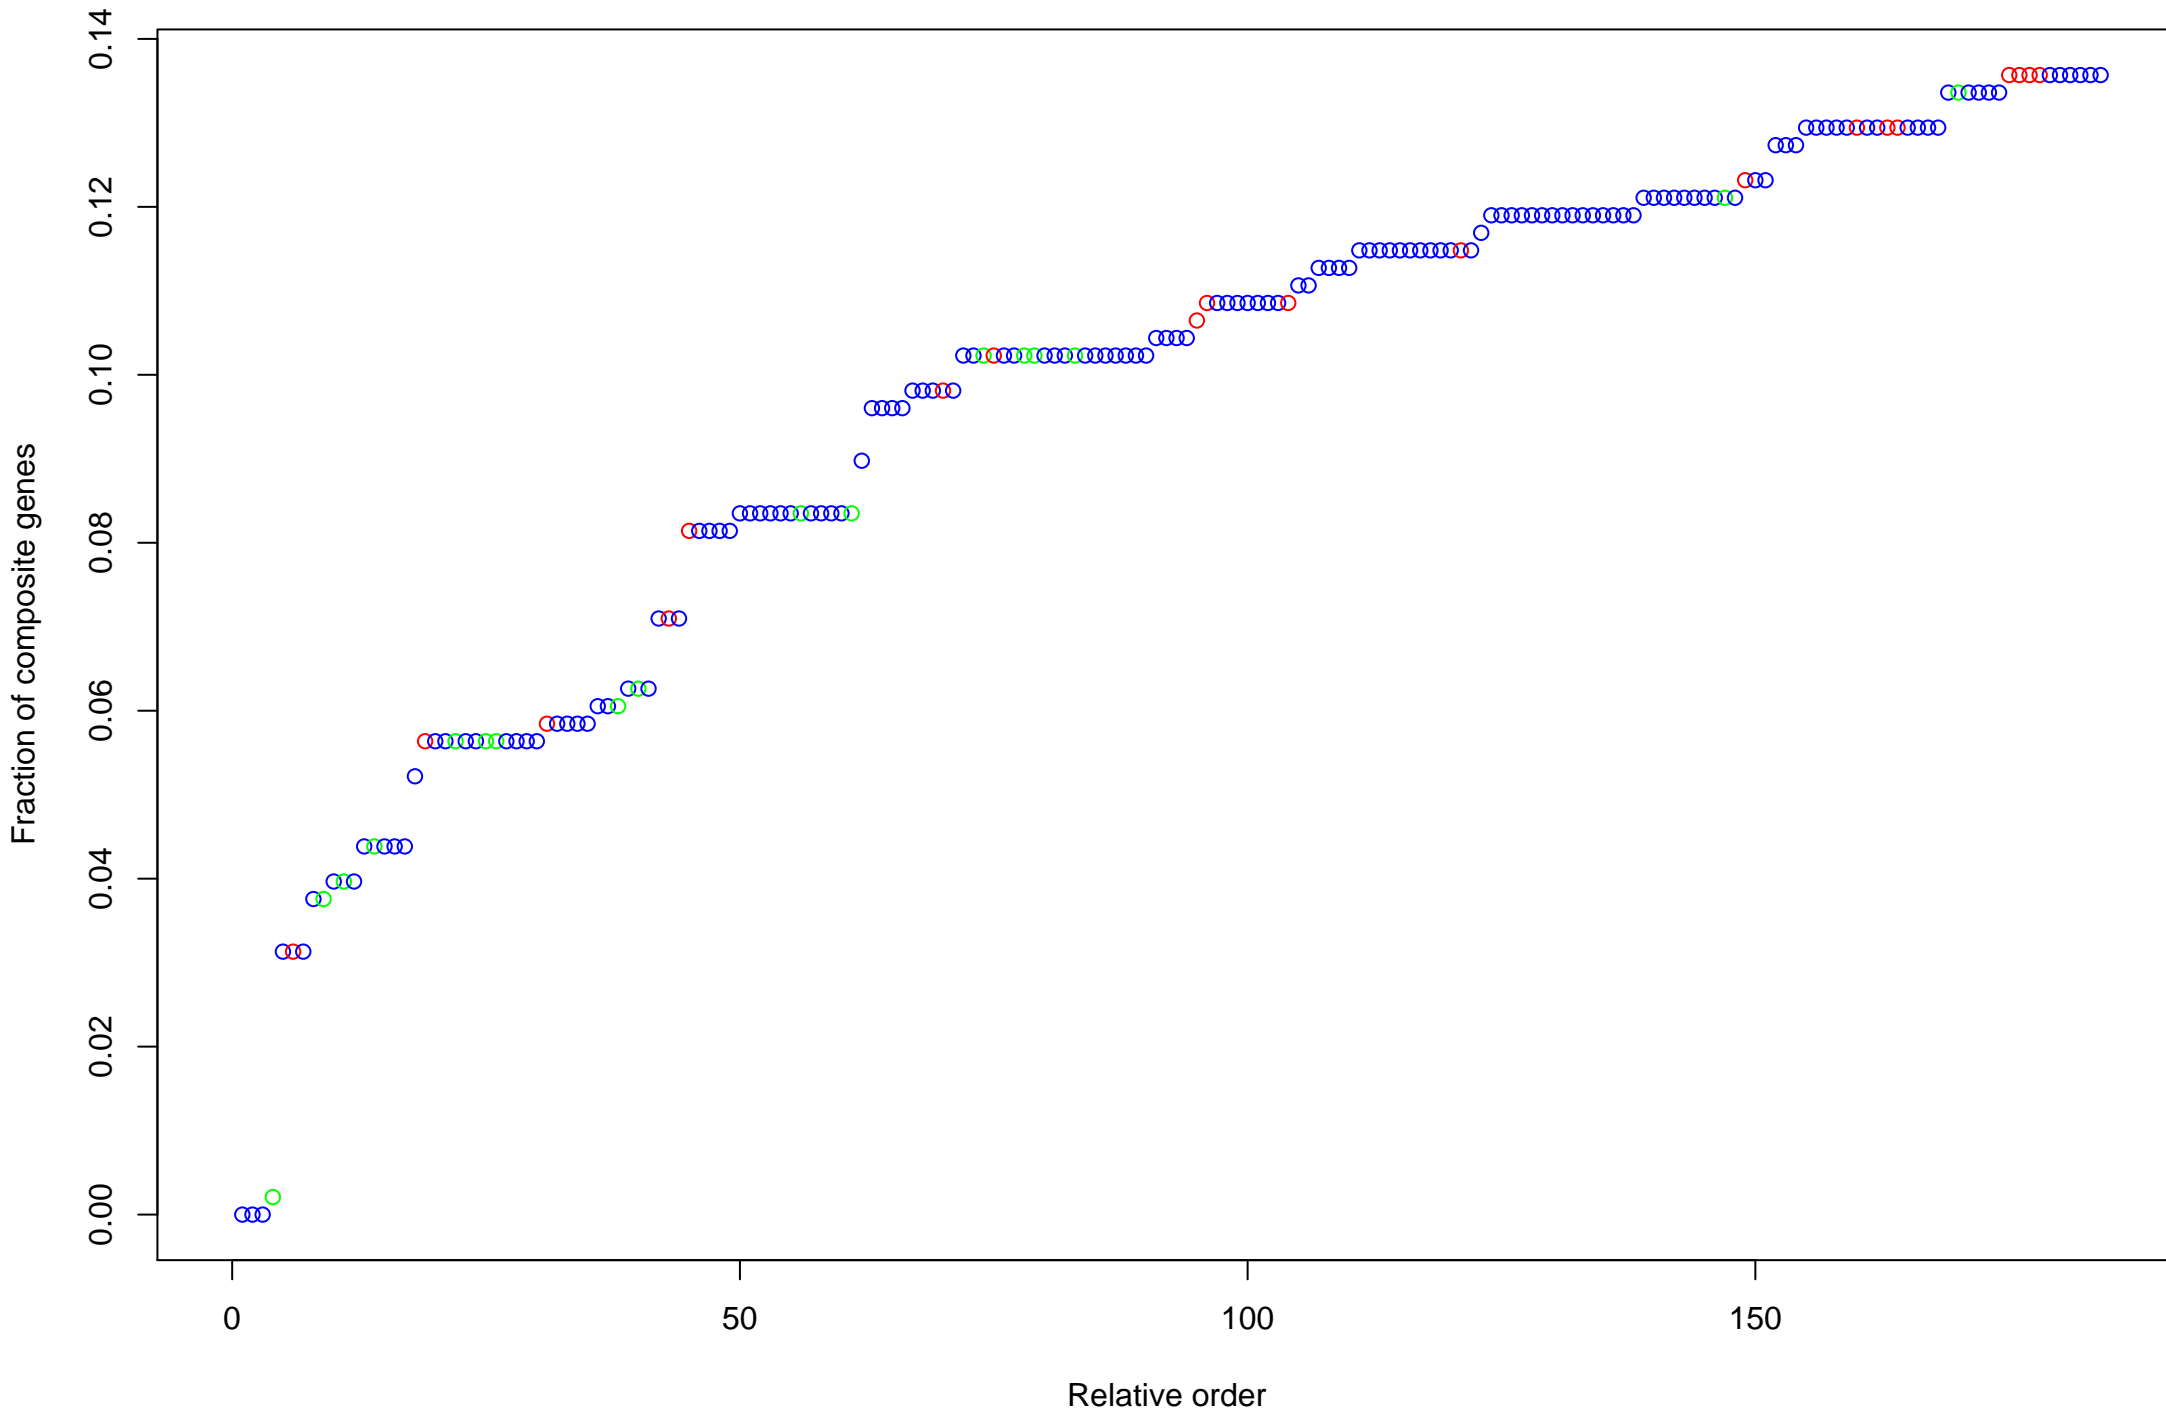

# SYNE-PCC-01 (*Synechocystis* sp.)

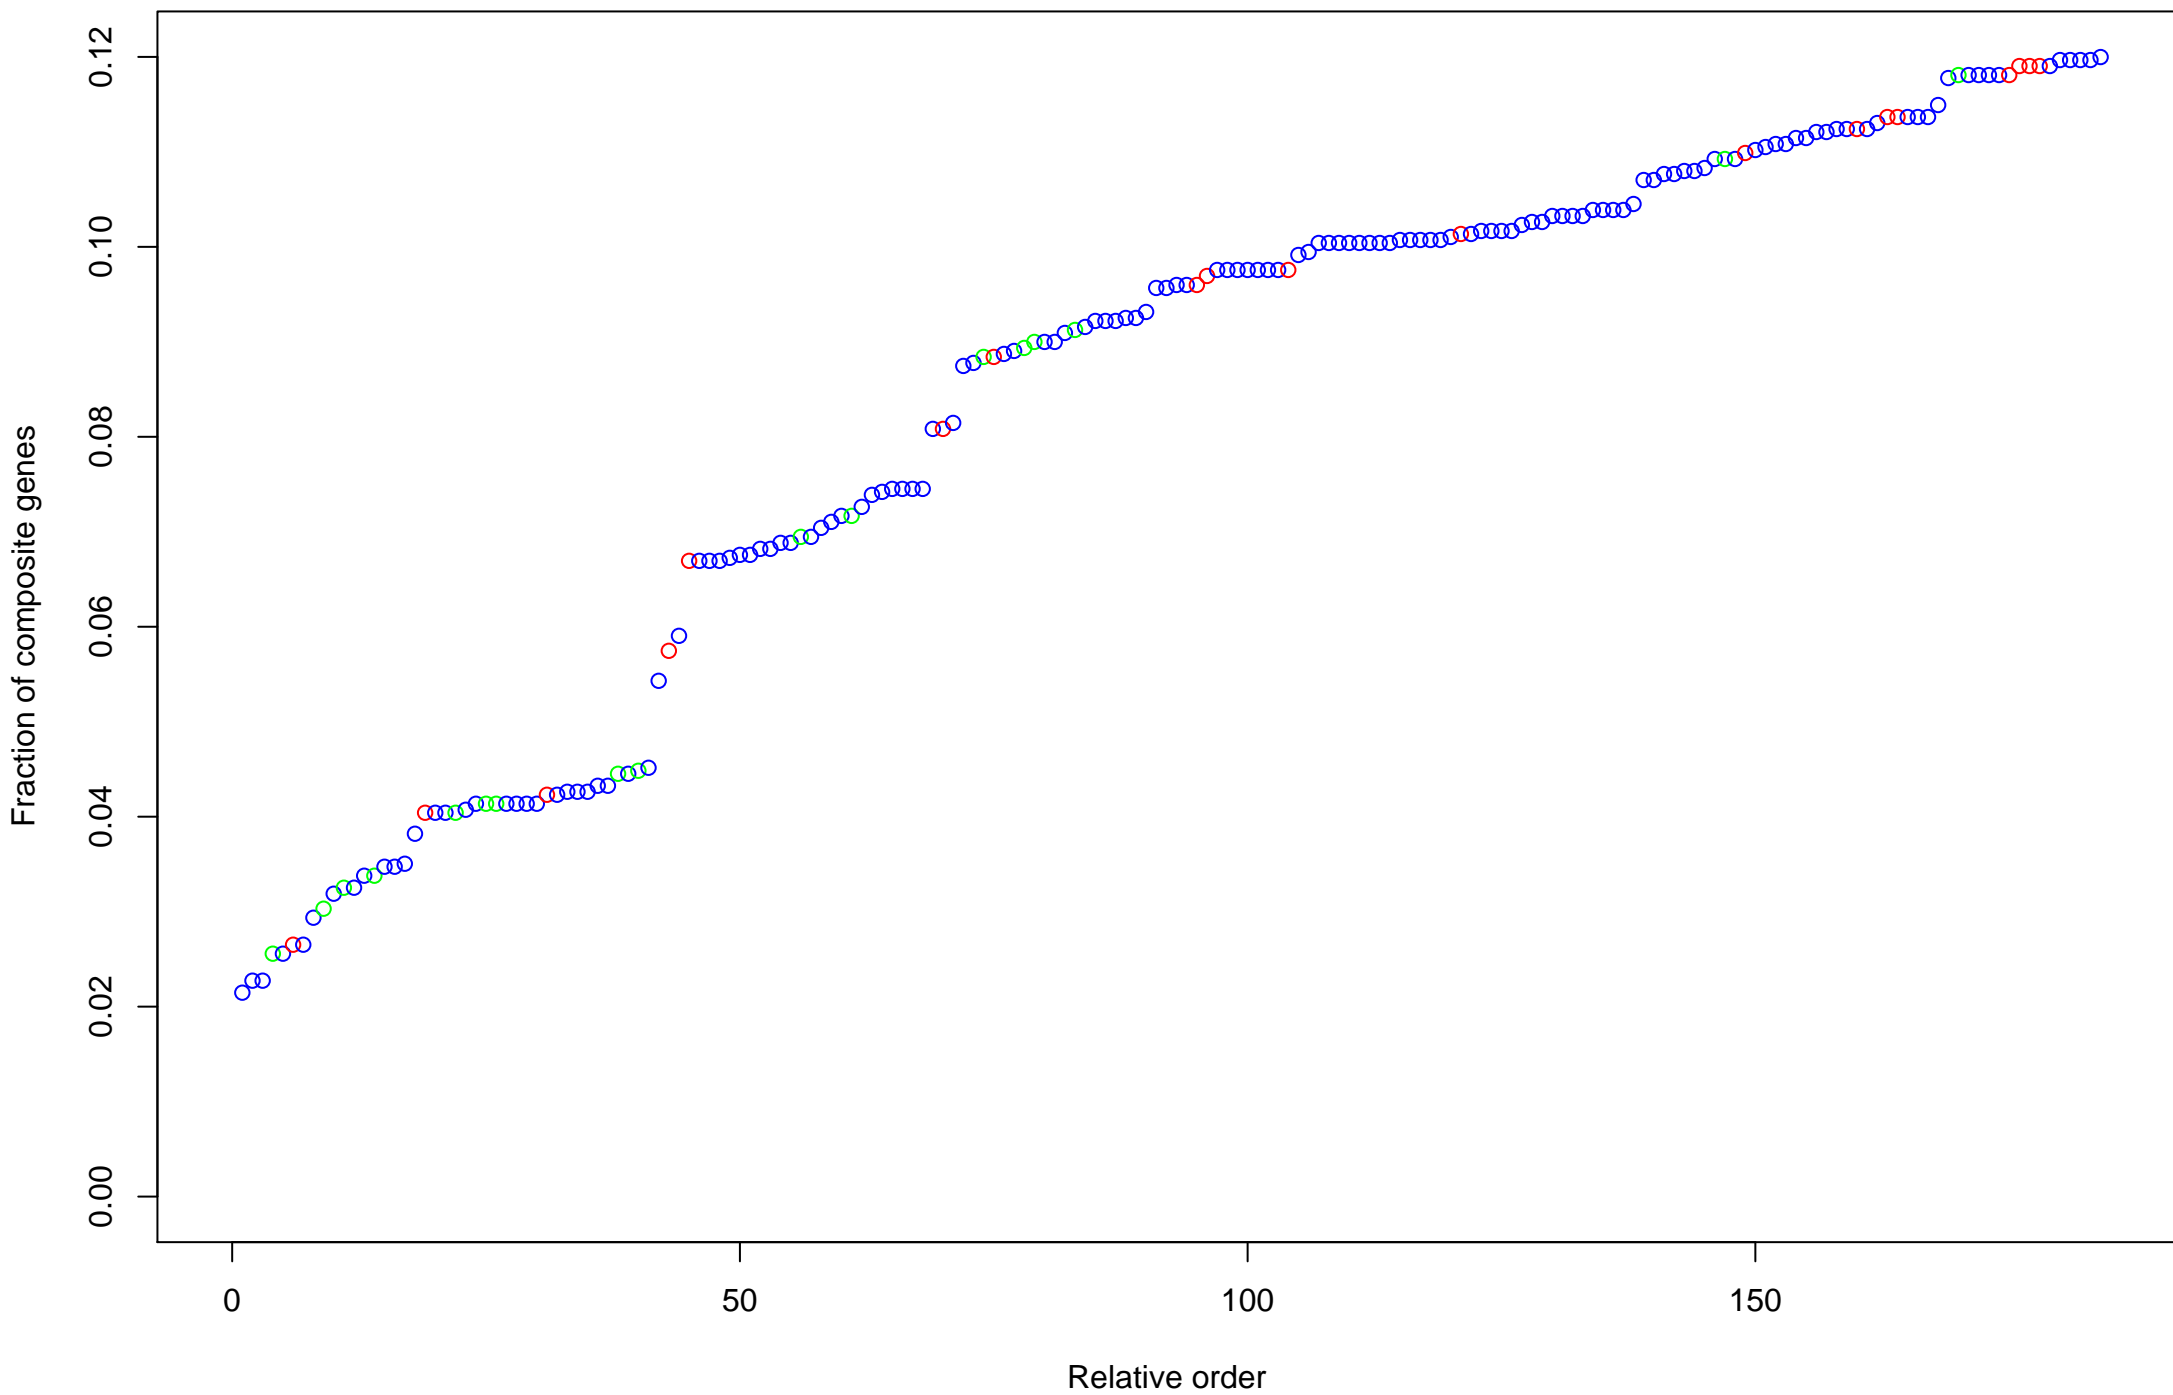

# MJAN-DSM-01 (*Methanococcus jannaschii*)

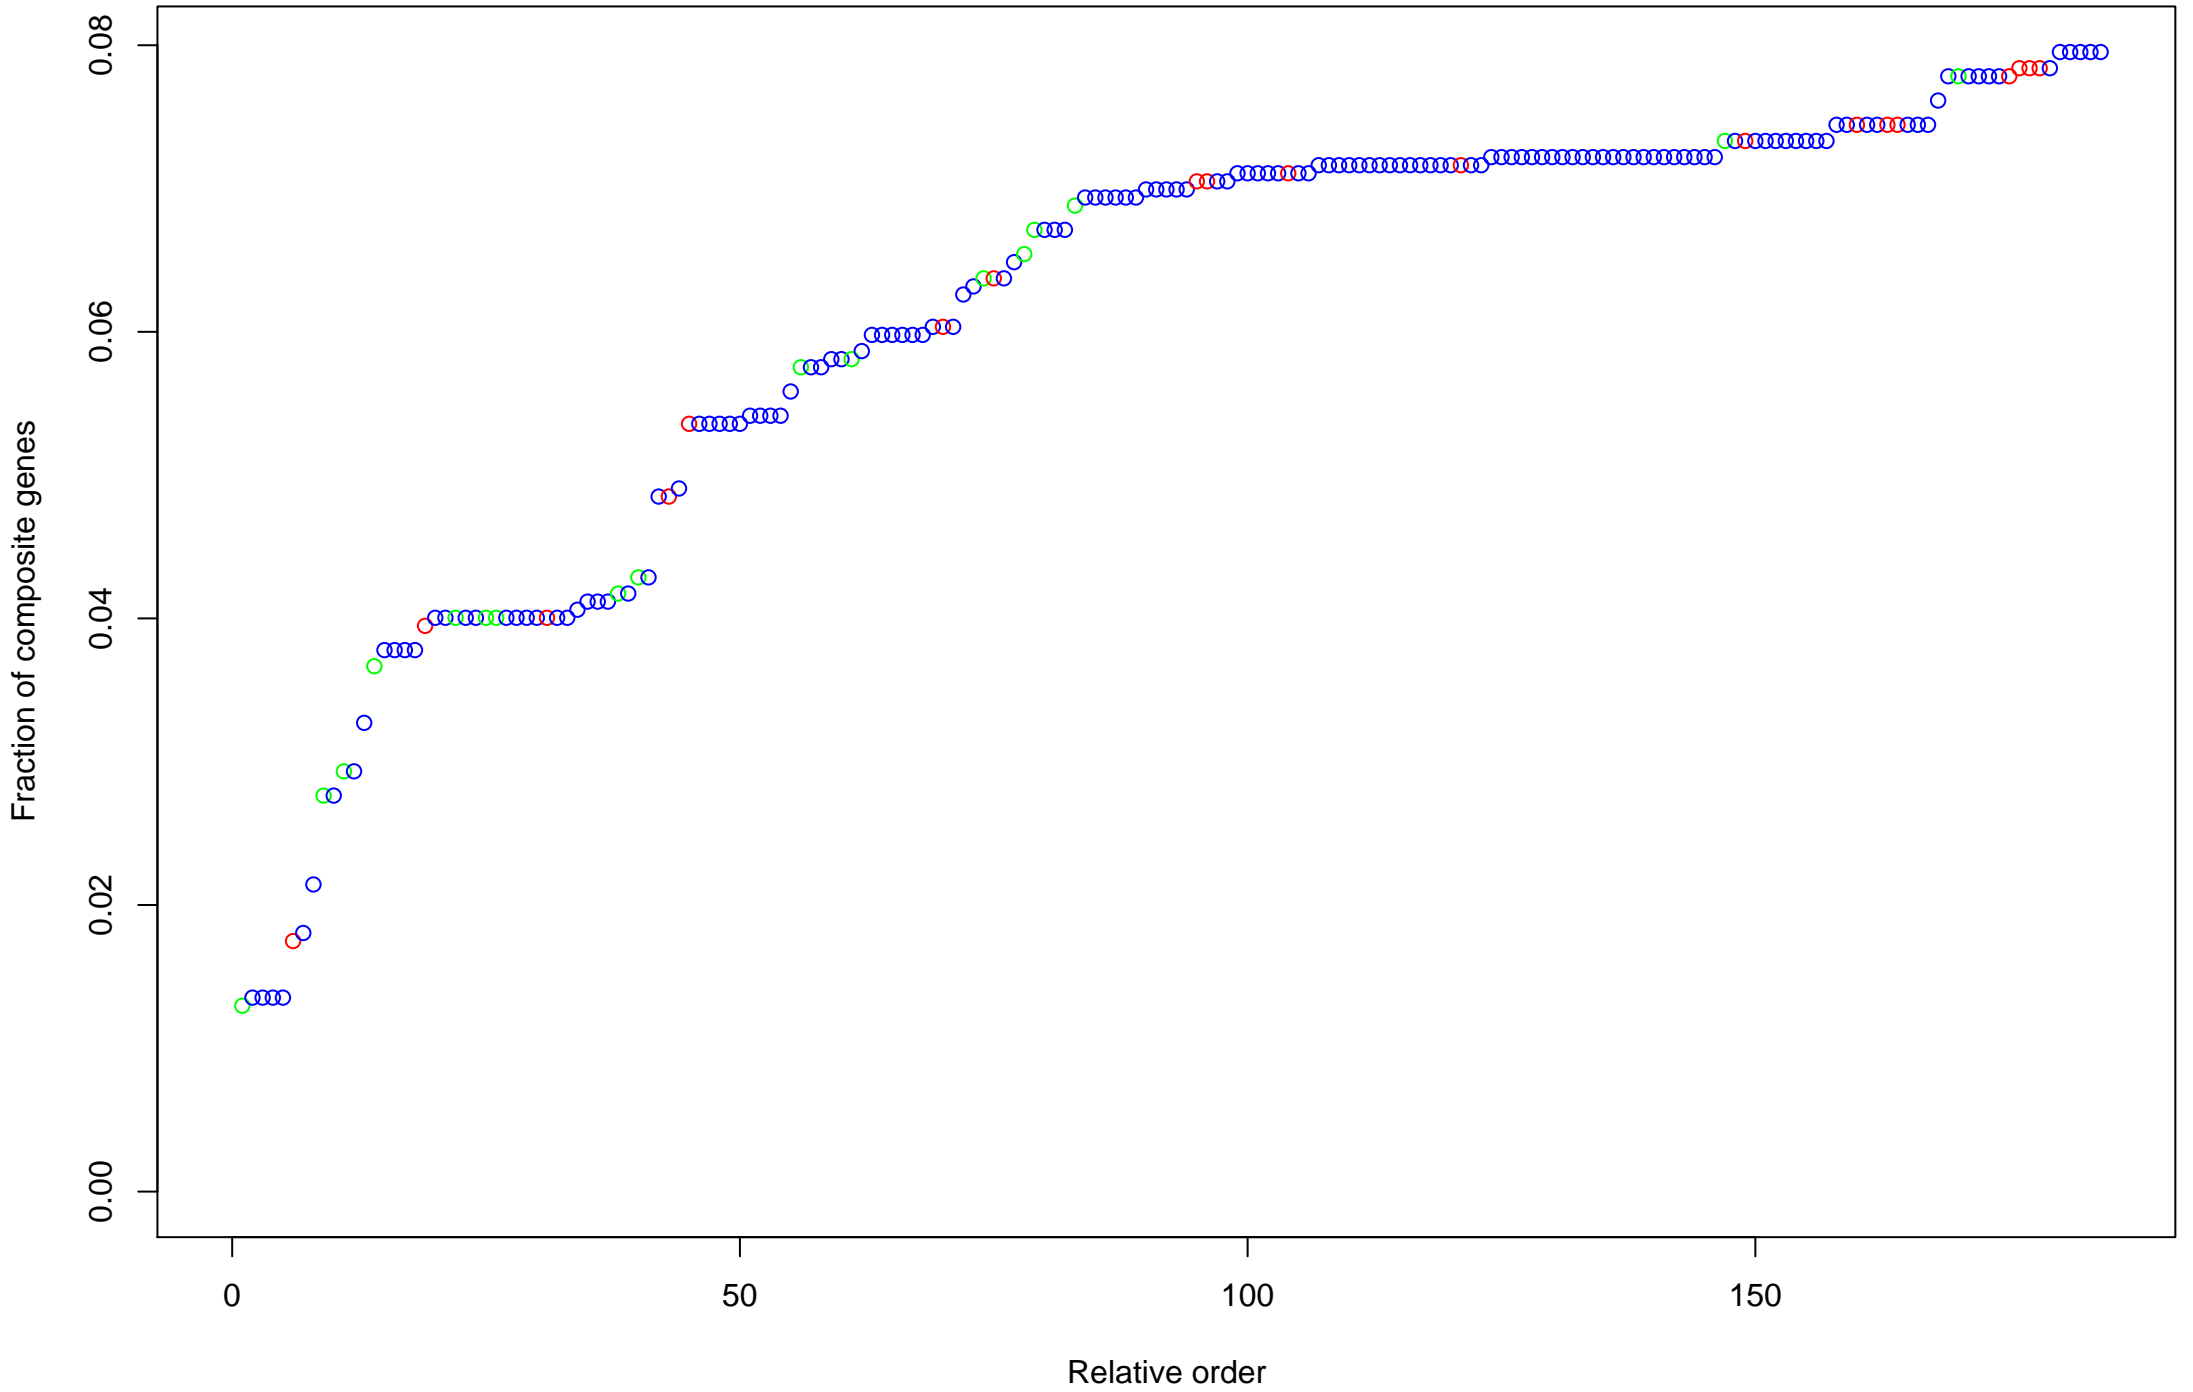

# MPNE-M12-01 (*Mycoplasma pneumoniae*)

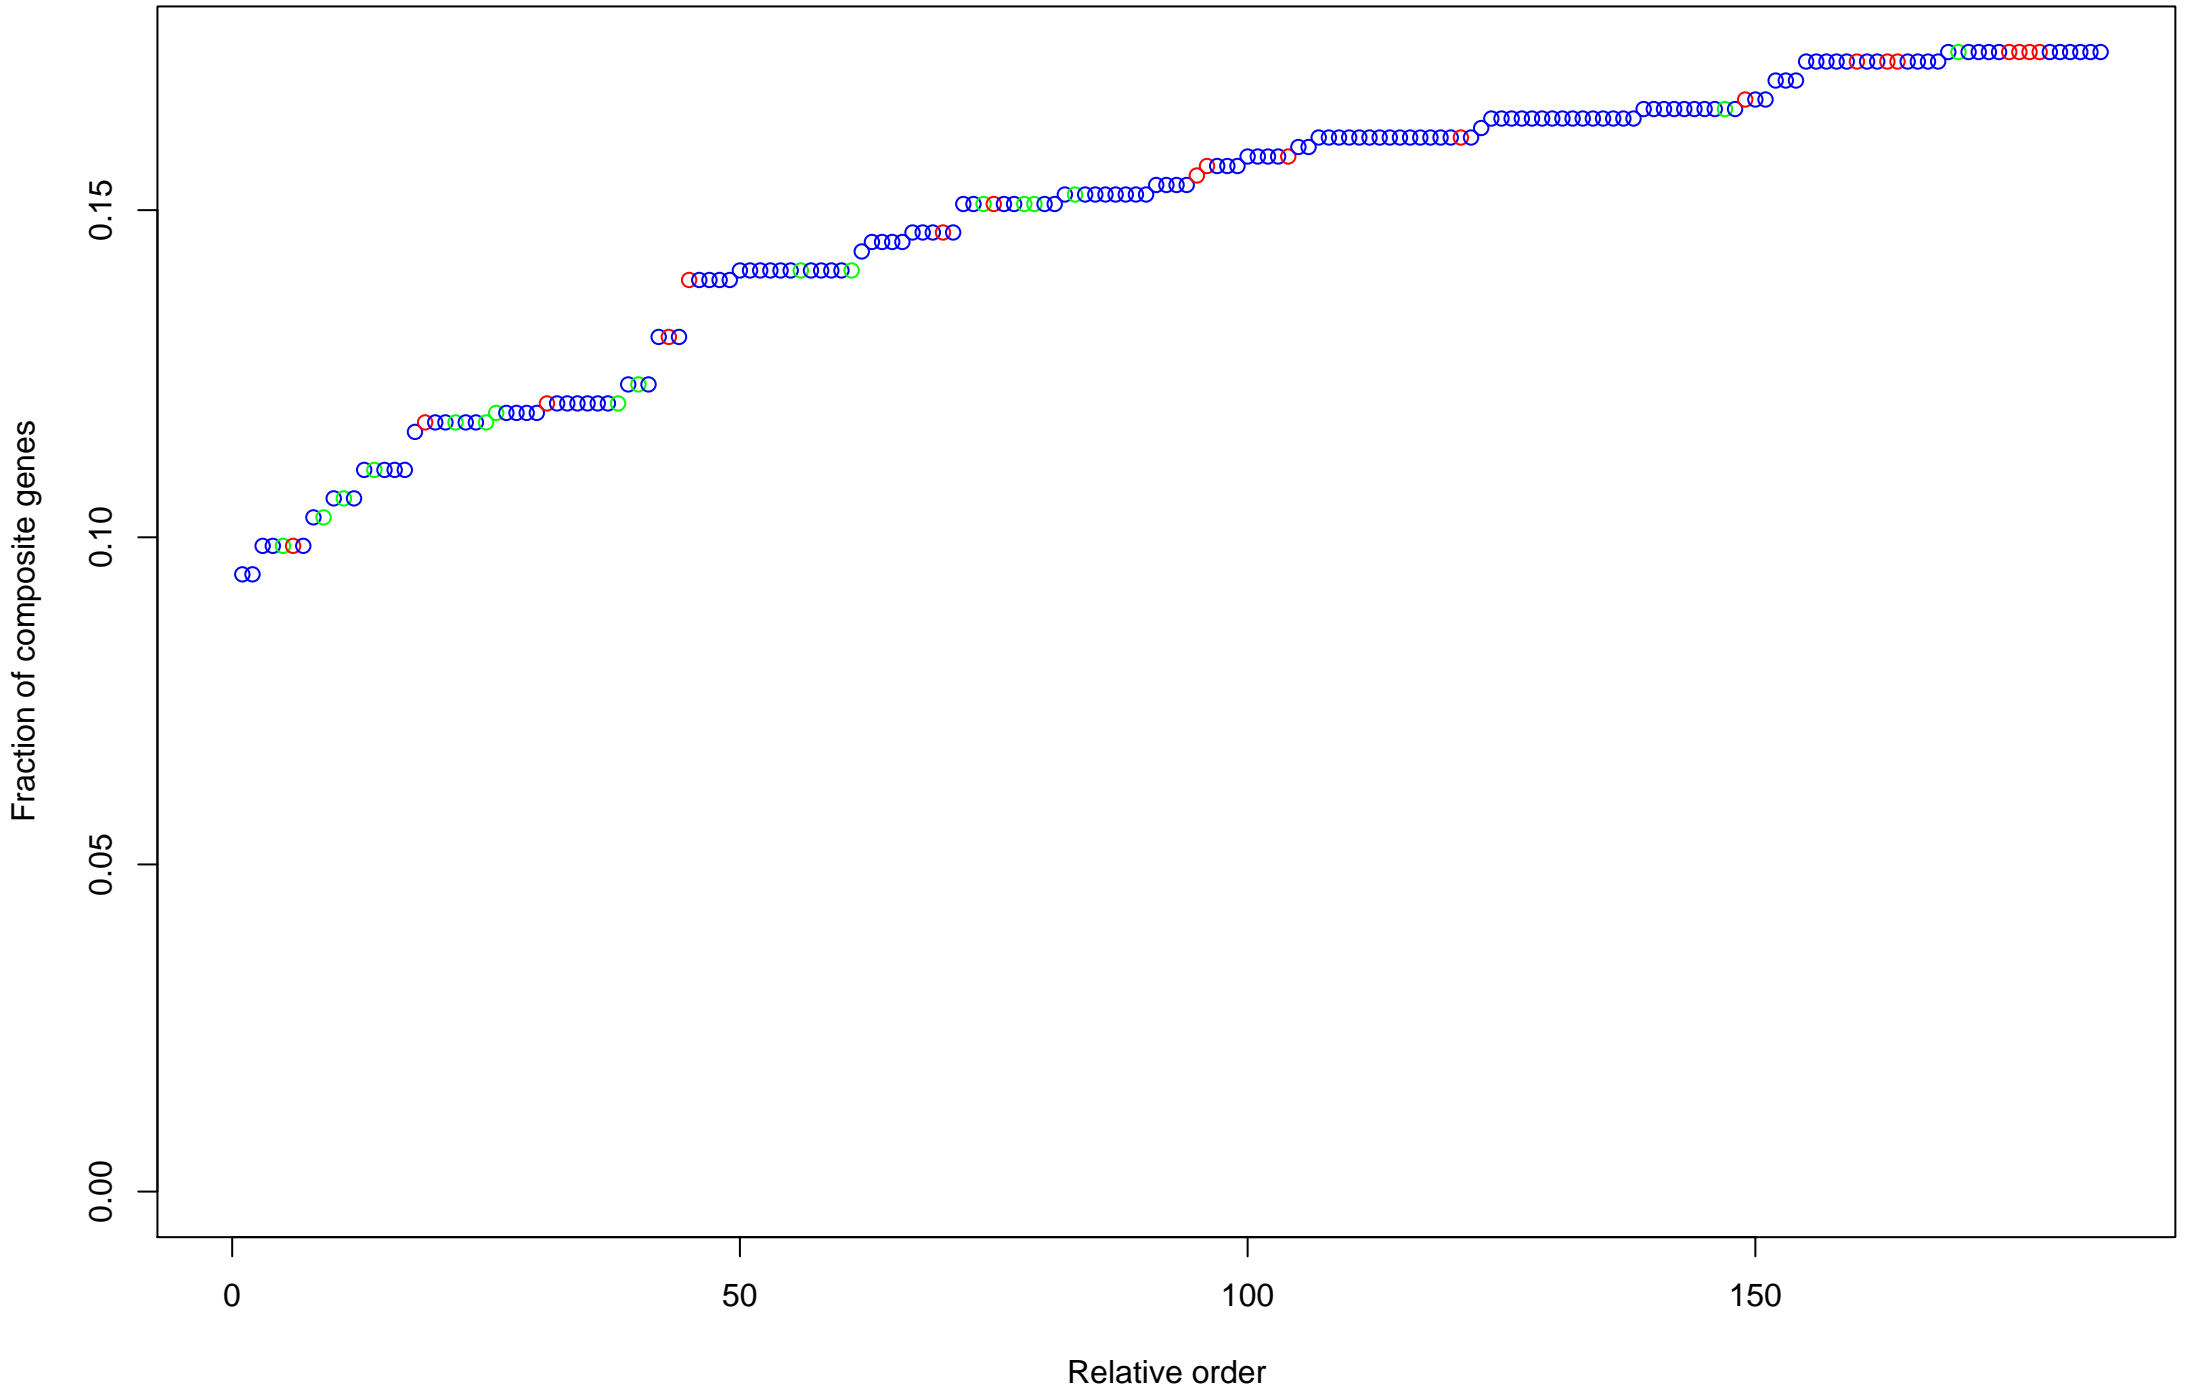

# SCER-S28-01 (*Saccharomyces cerevisiae*)

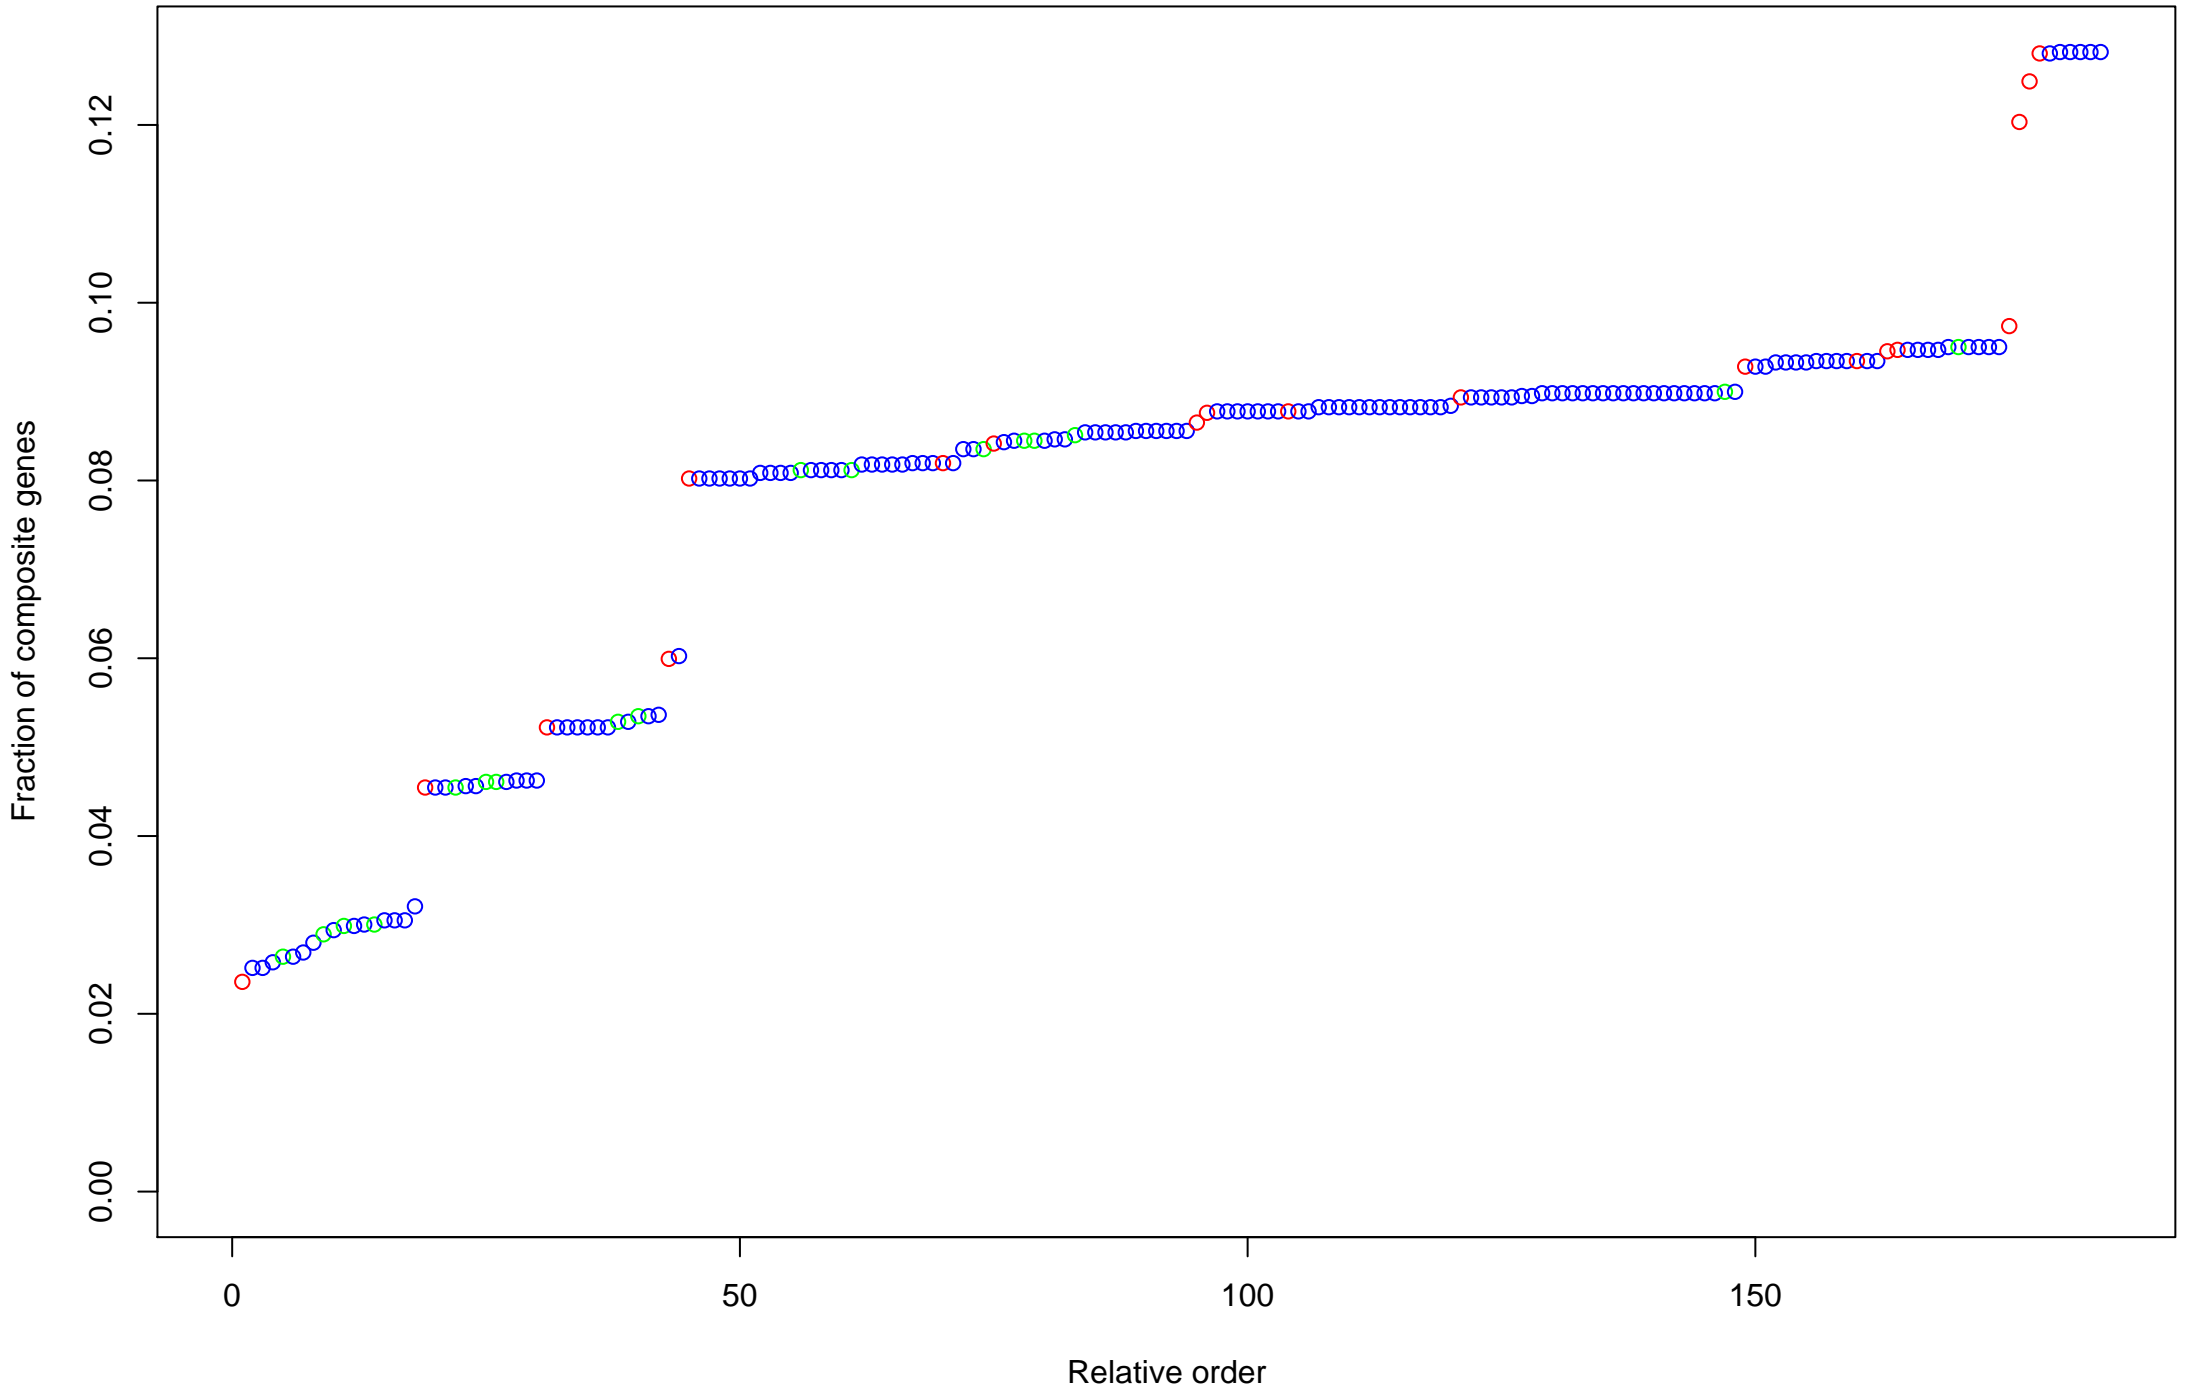

# HPYL-266-01 (*Helicobacter pylori*)

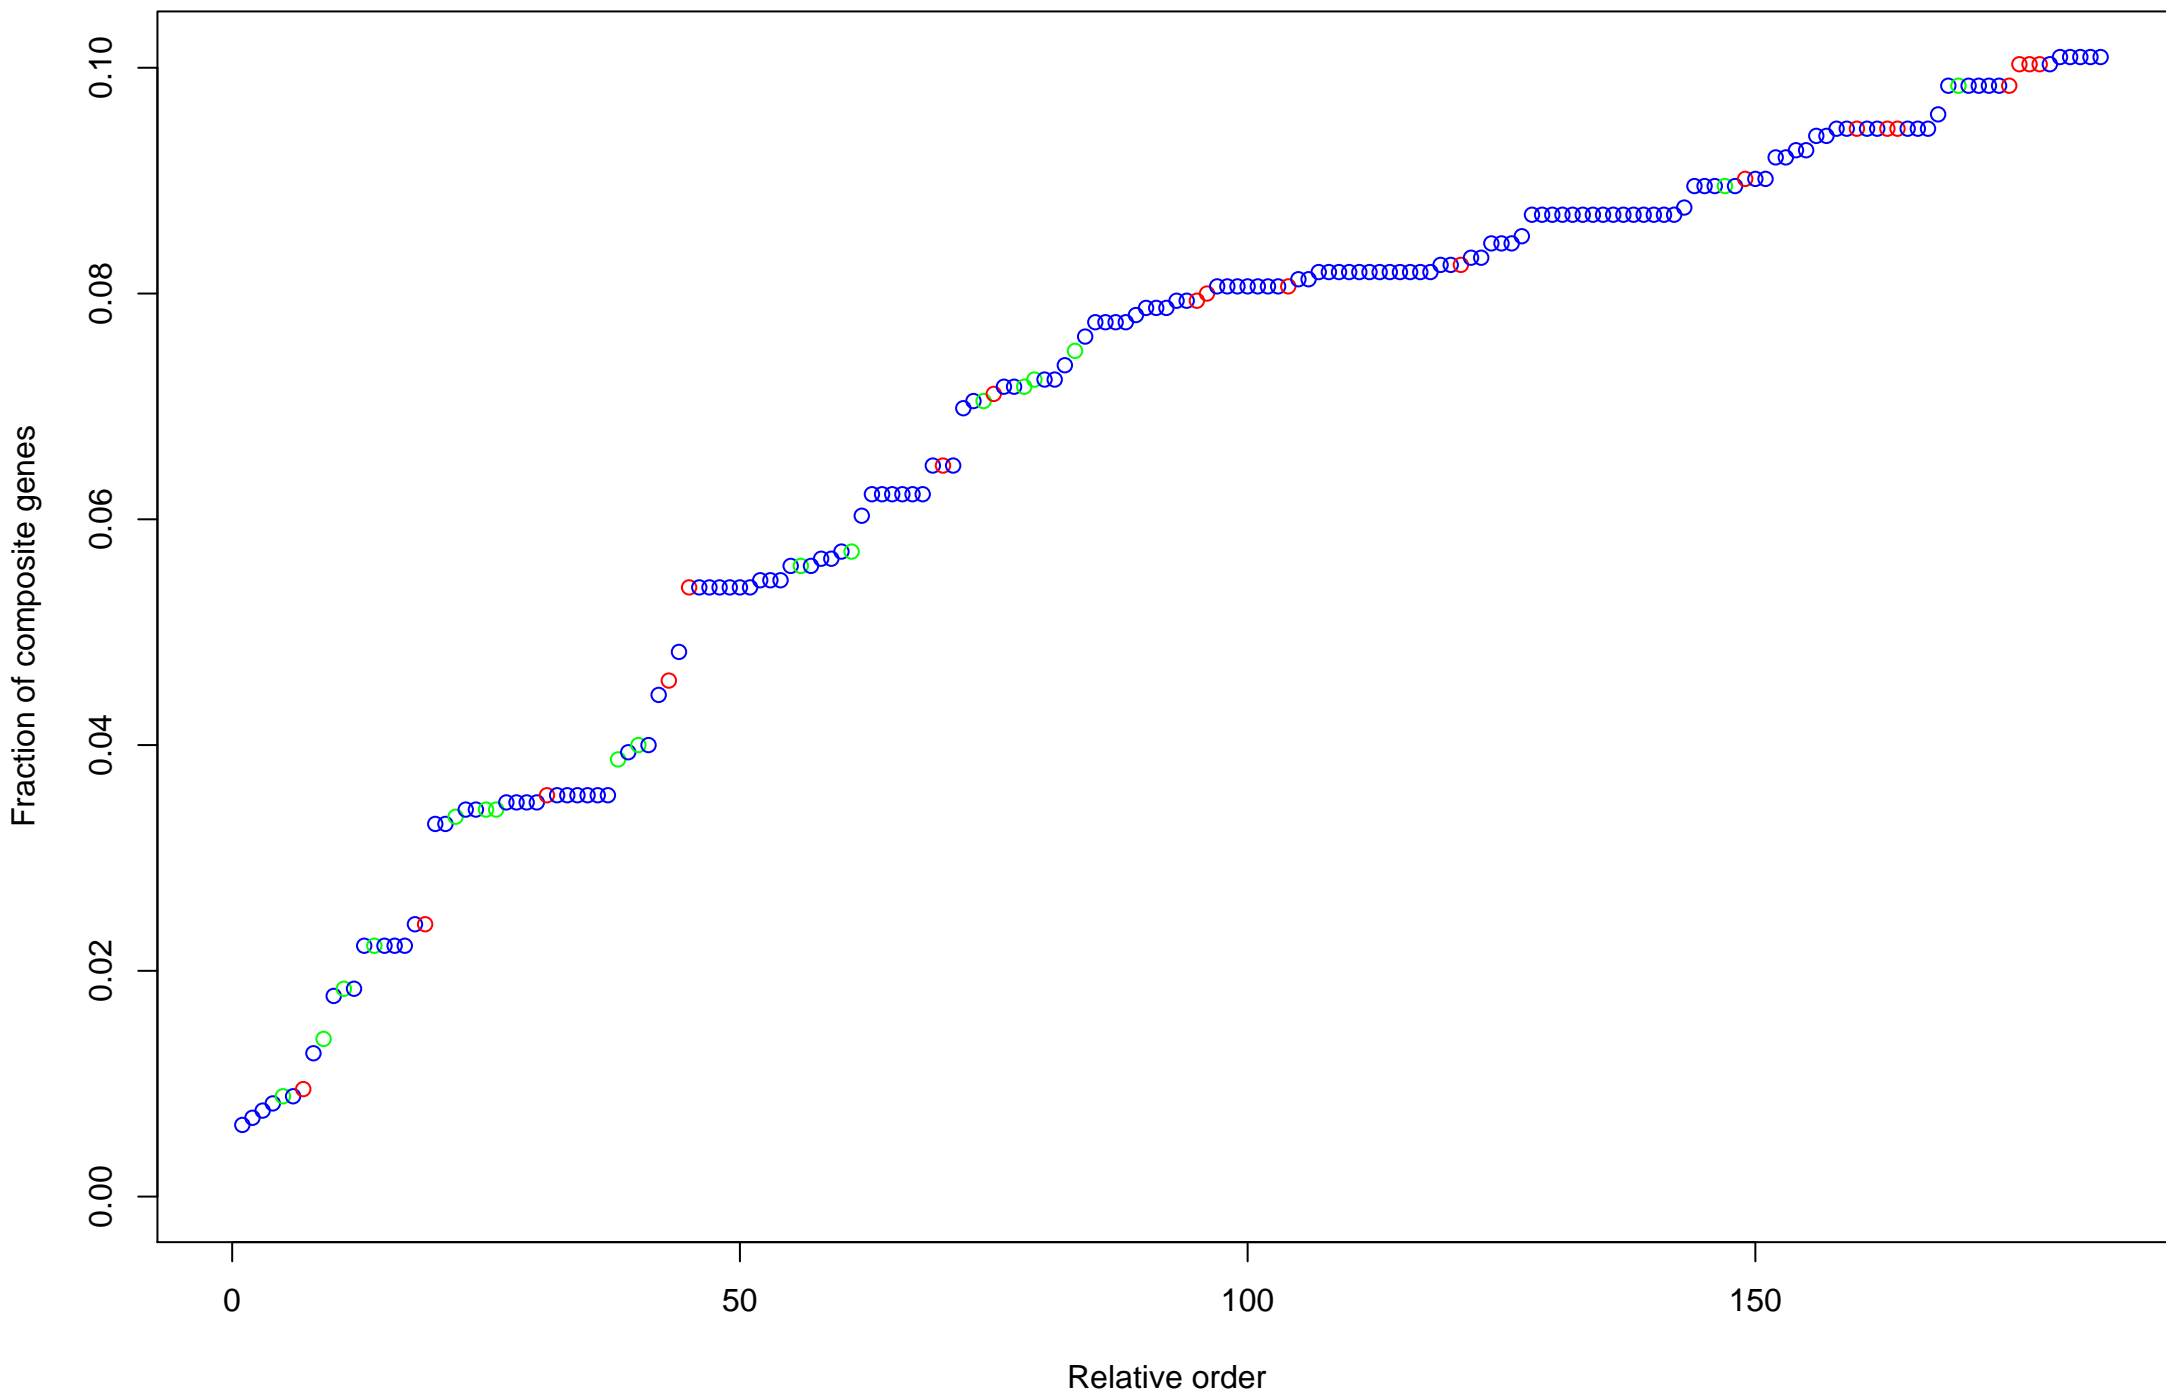

# ECOL-MG1-01 (Escherichia coli)

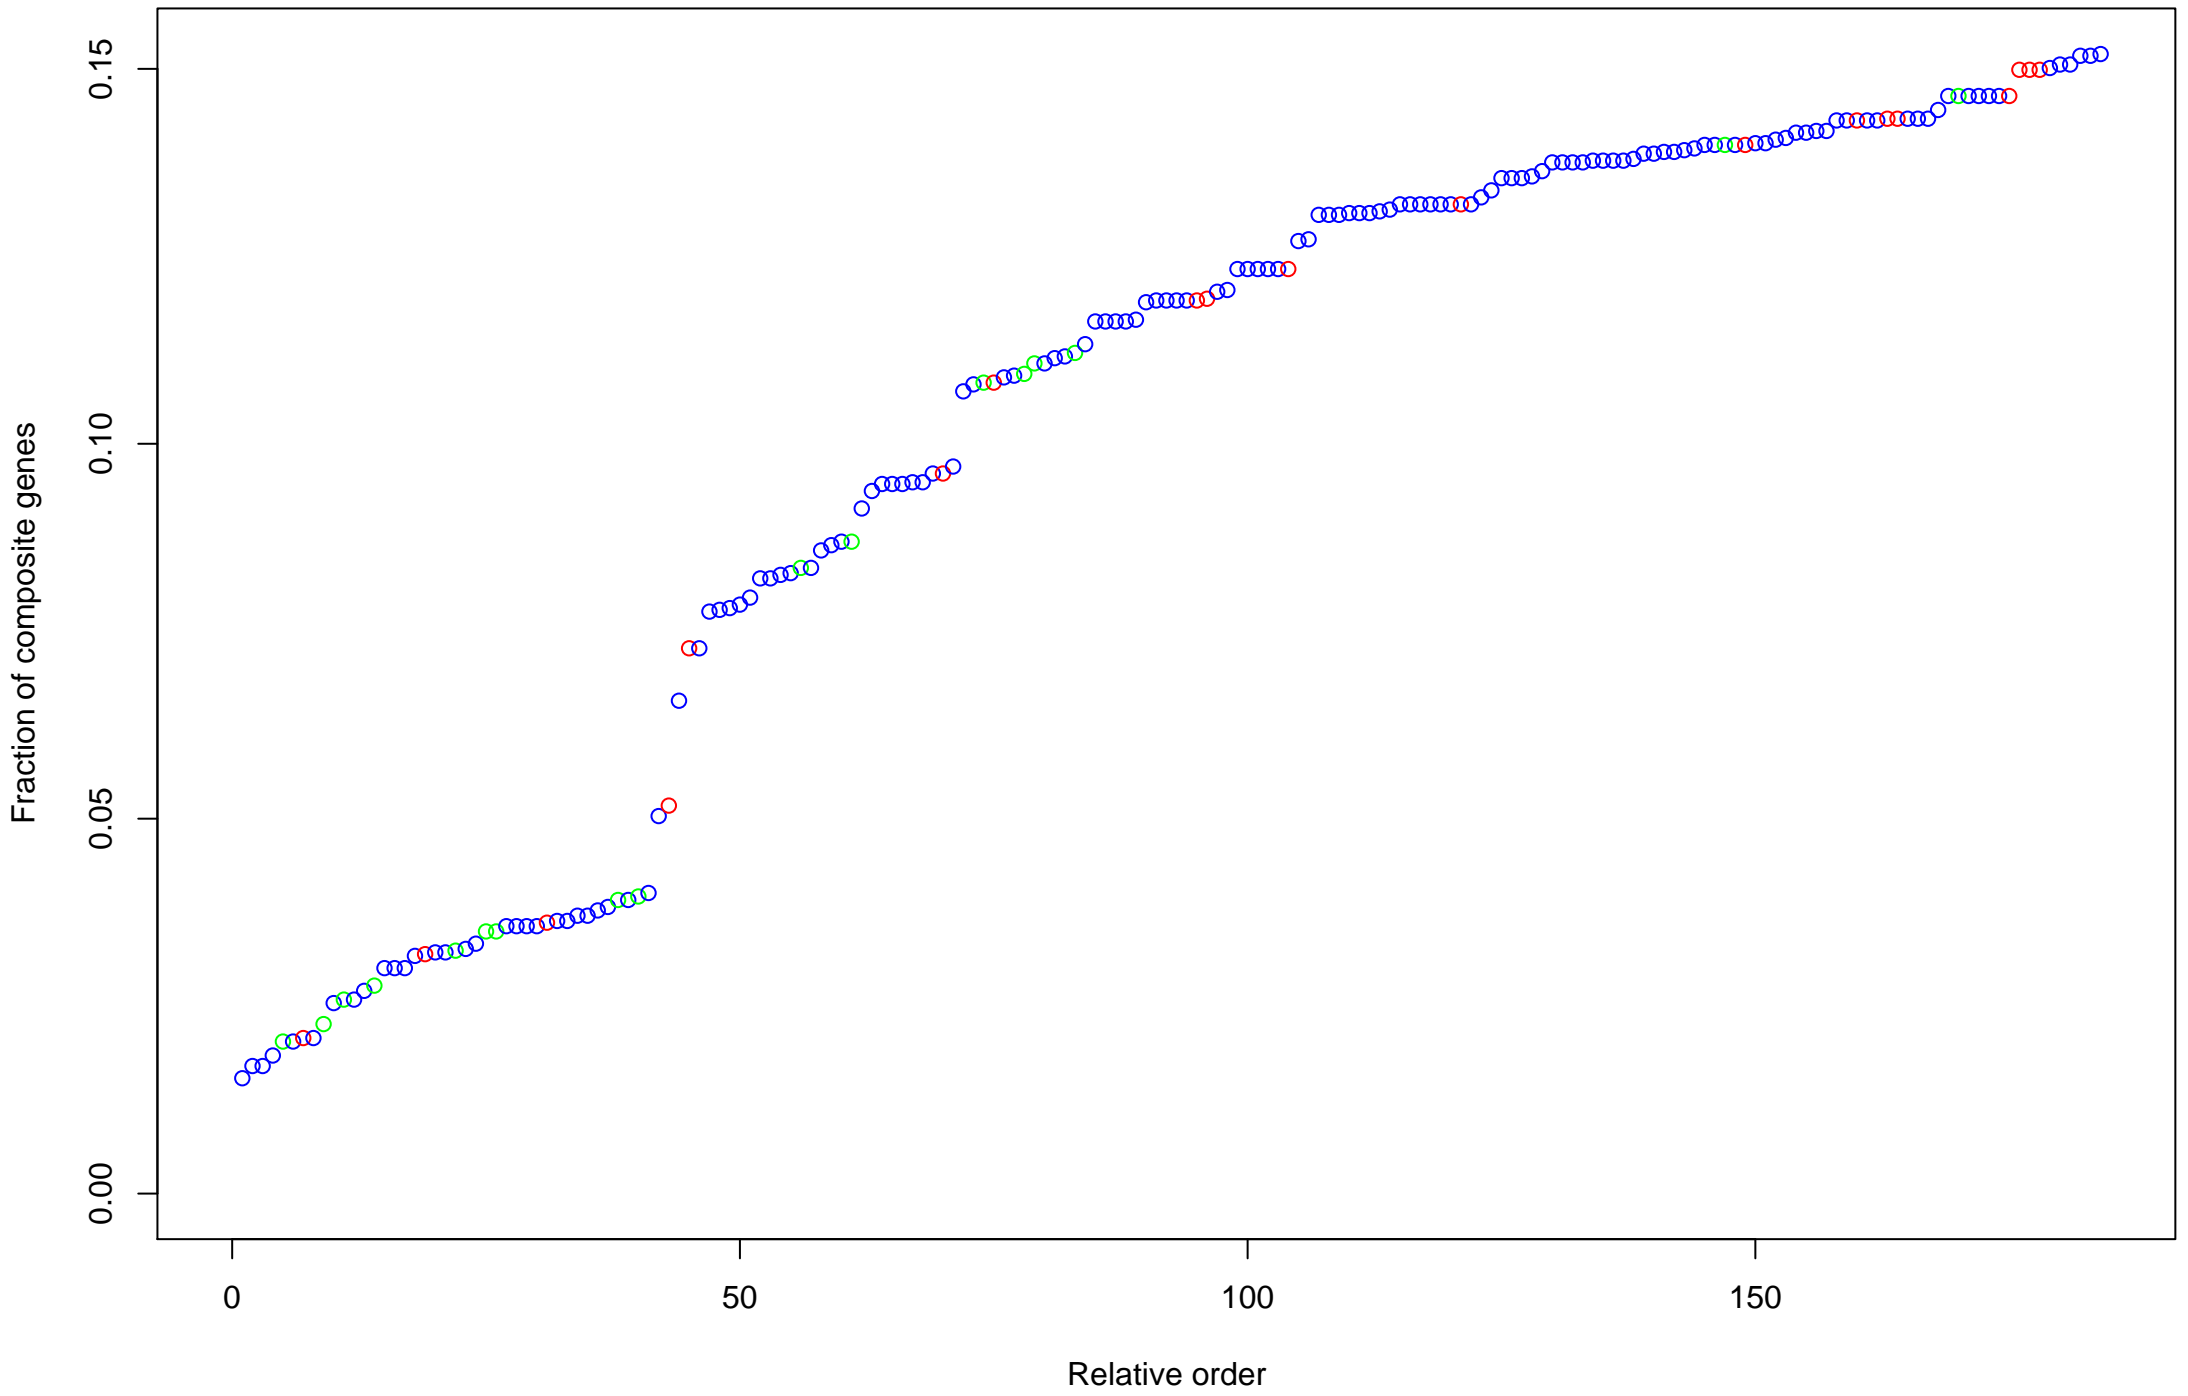



# MTHE-DEL-01 (*Methanobacterium thermoautotrophicum*)

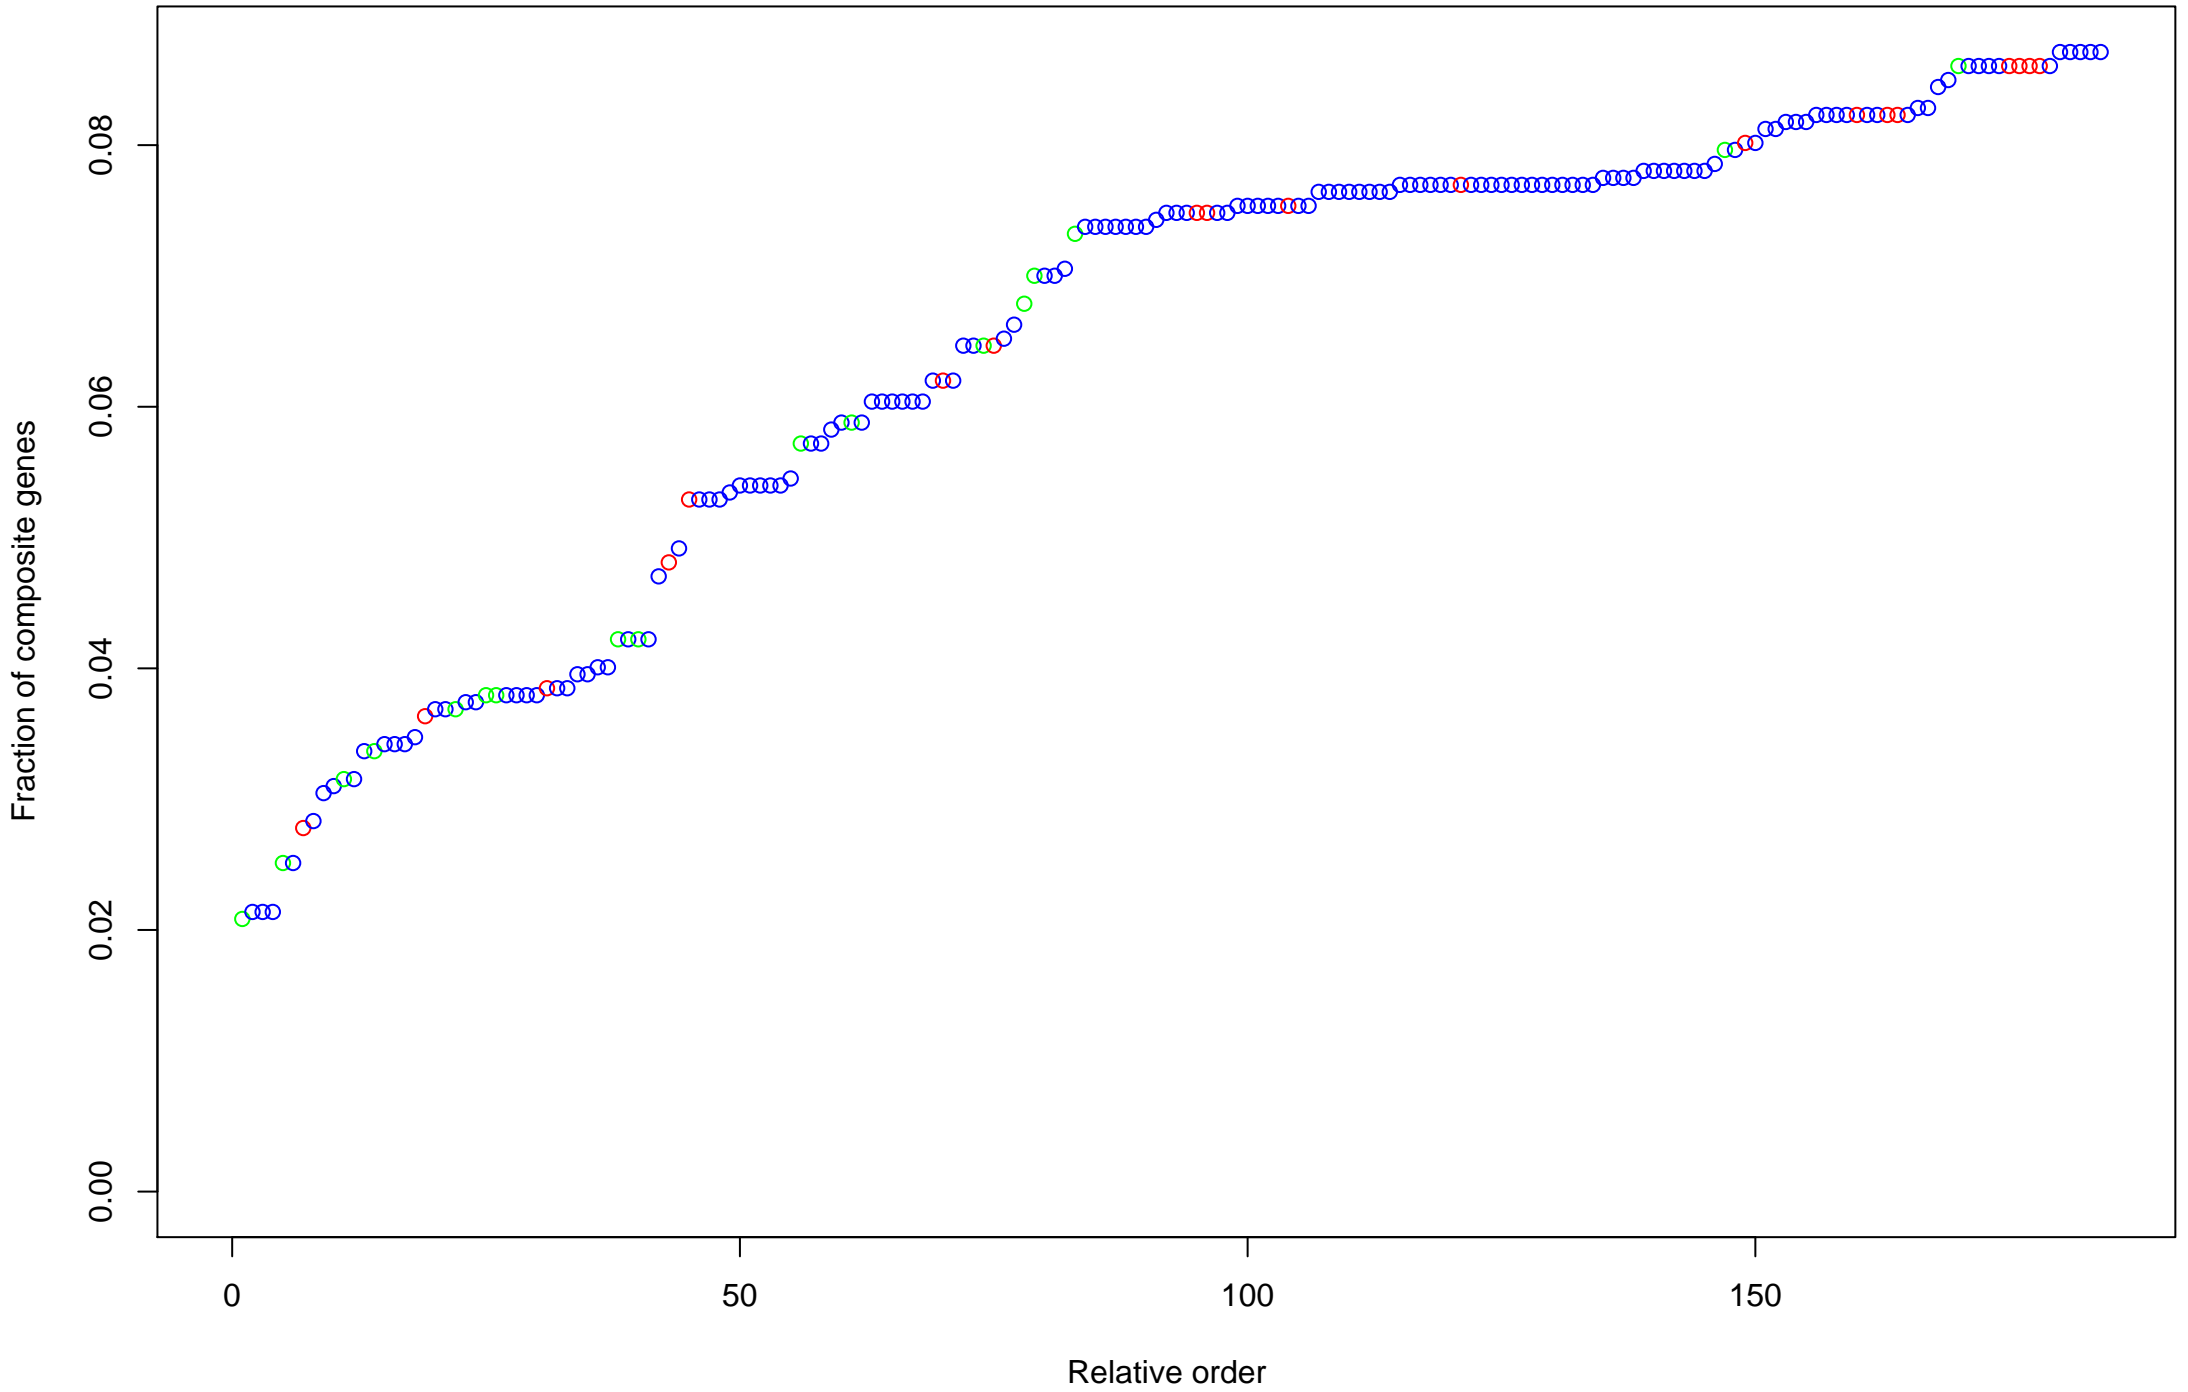

# BSUB-168-01 (*Bacillus subtilis*)

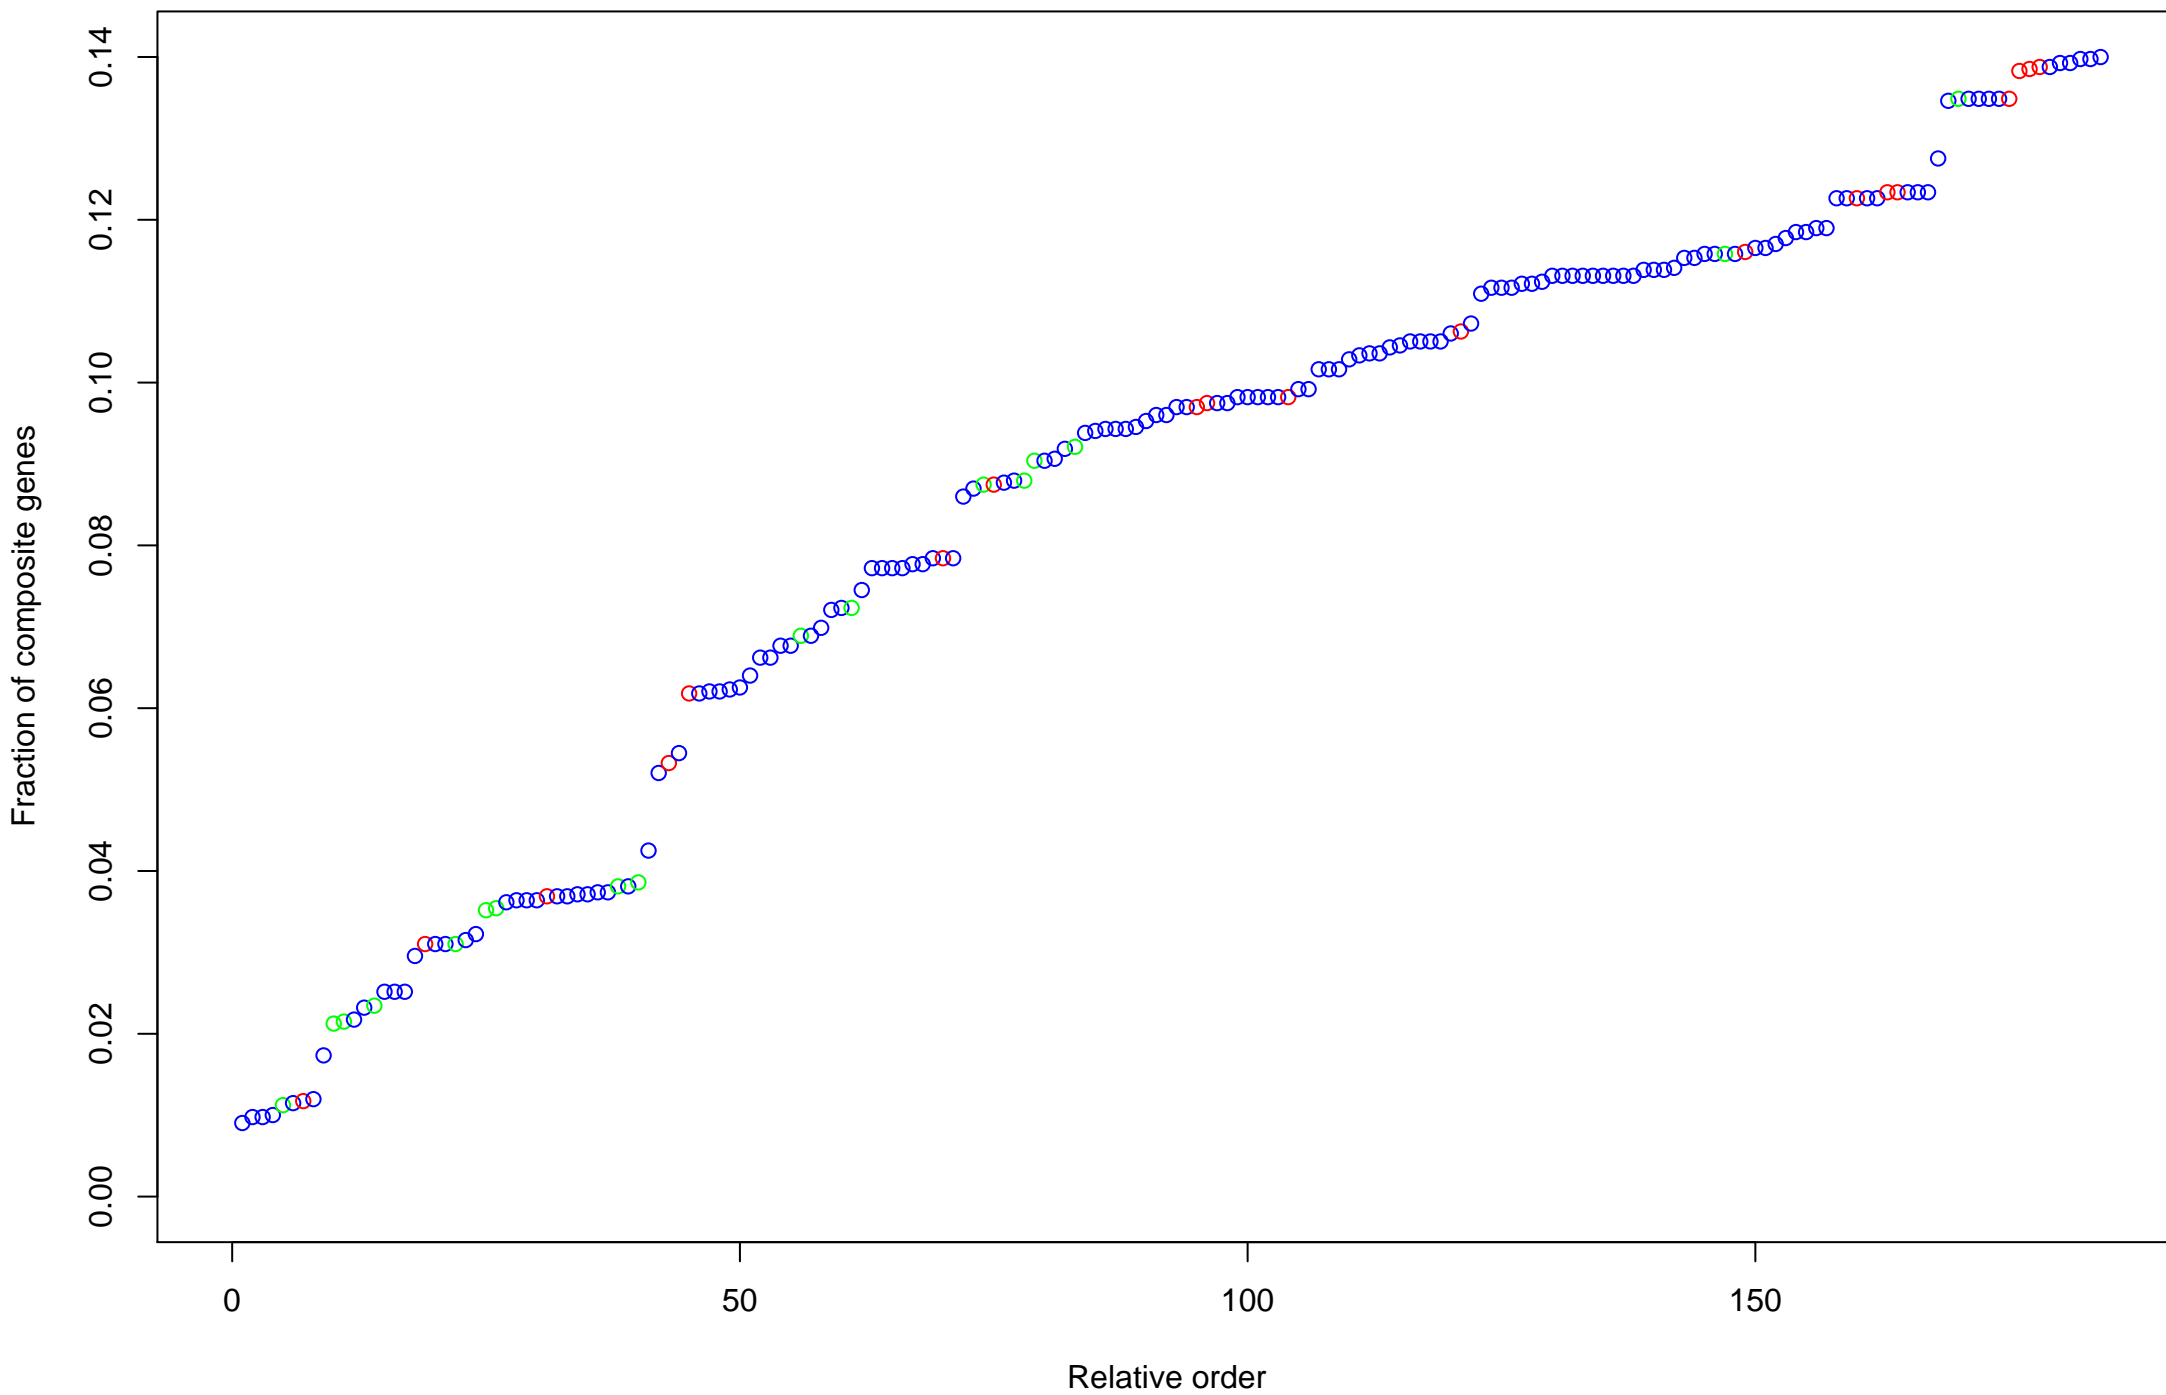

# AFUL-DSM-01 (*Archaeoglobus fulgidus*)

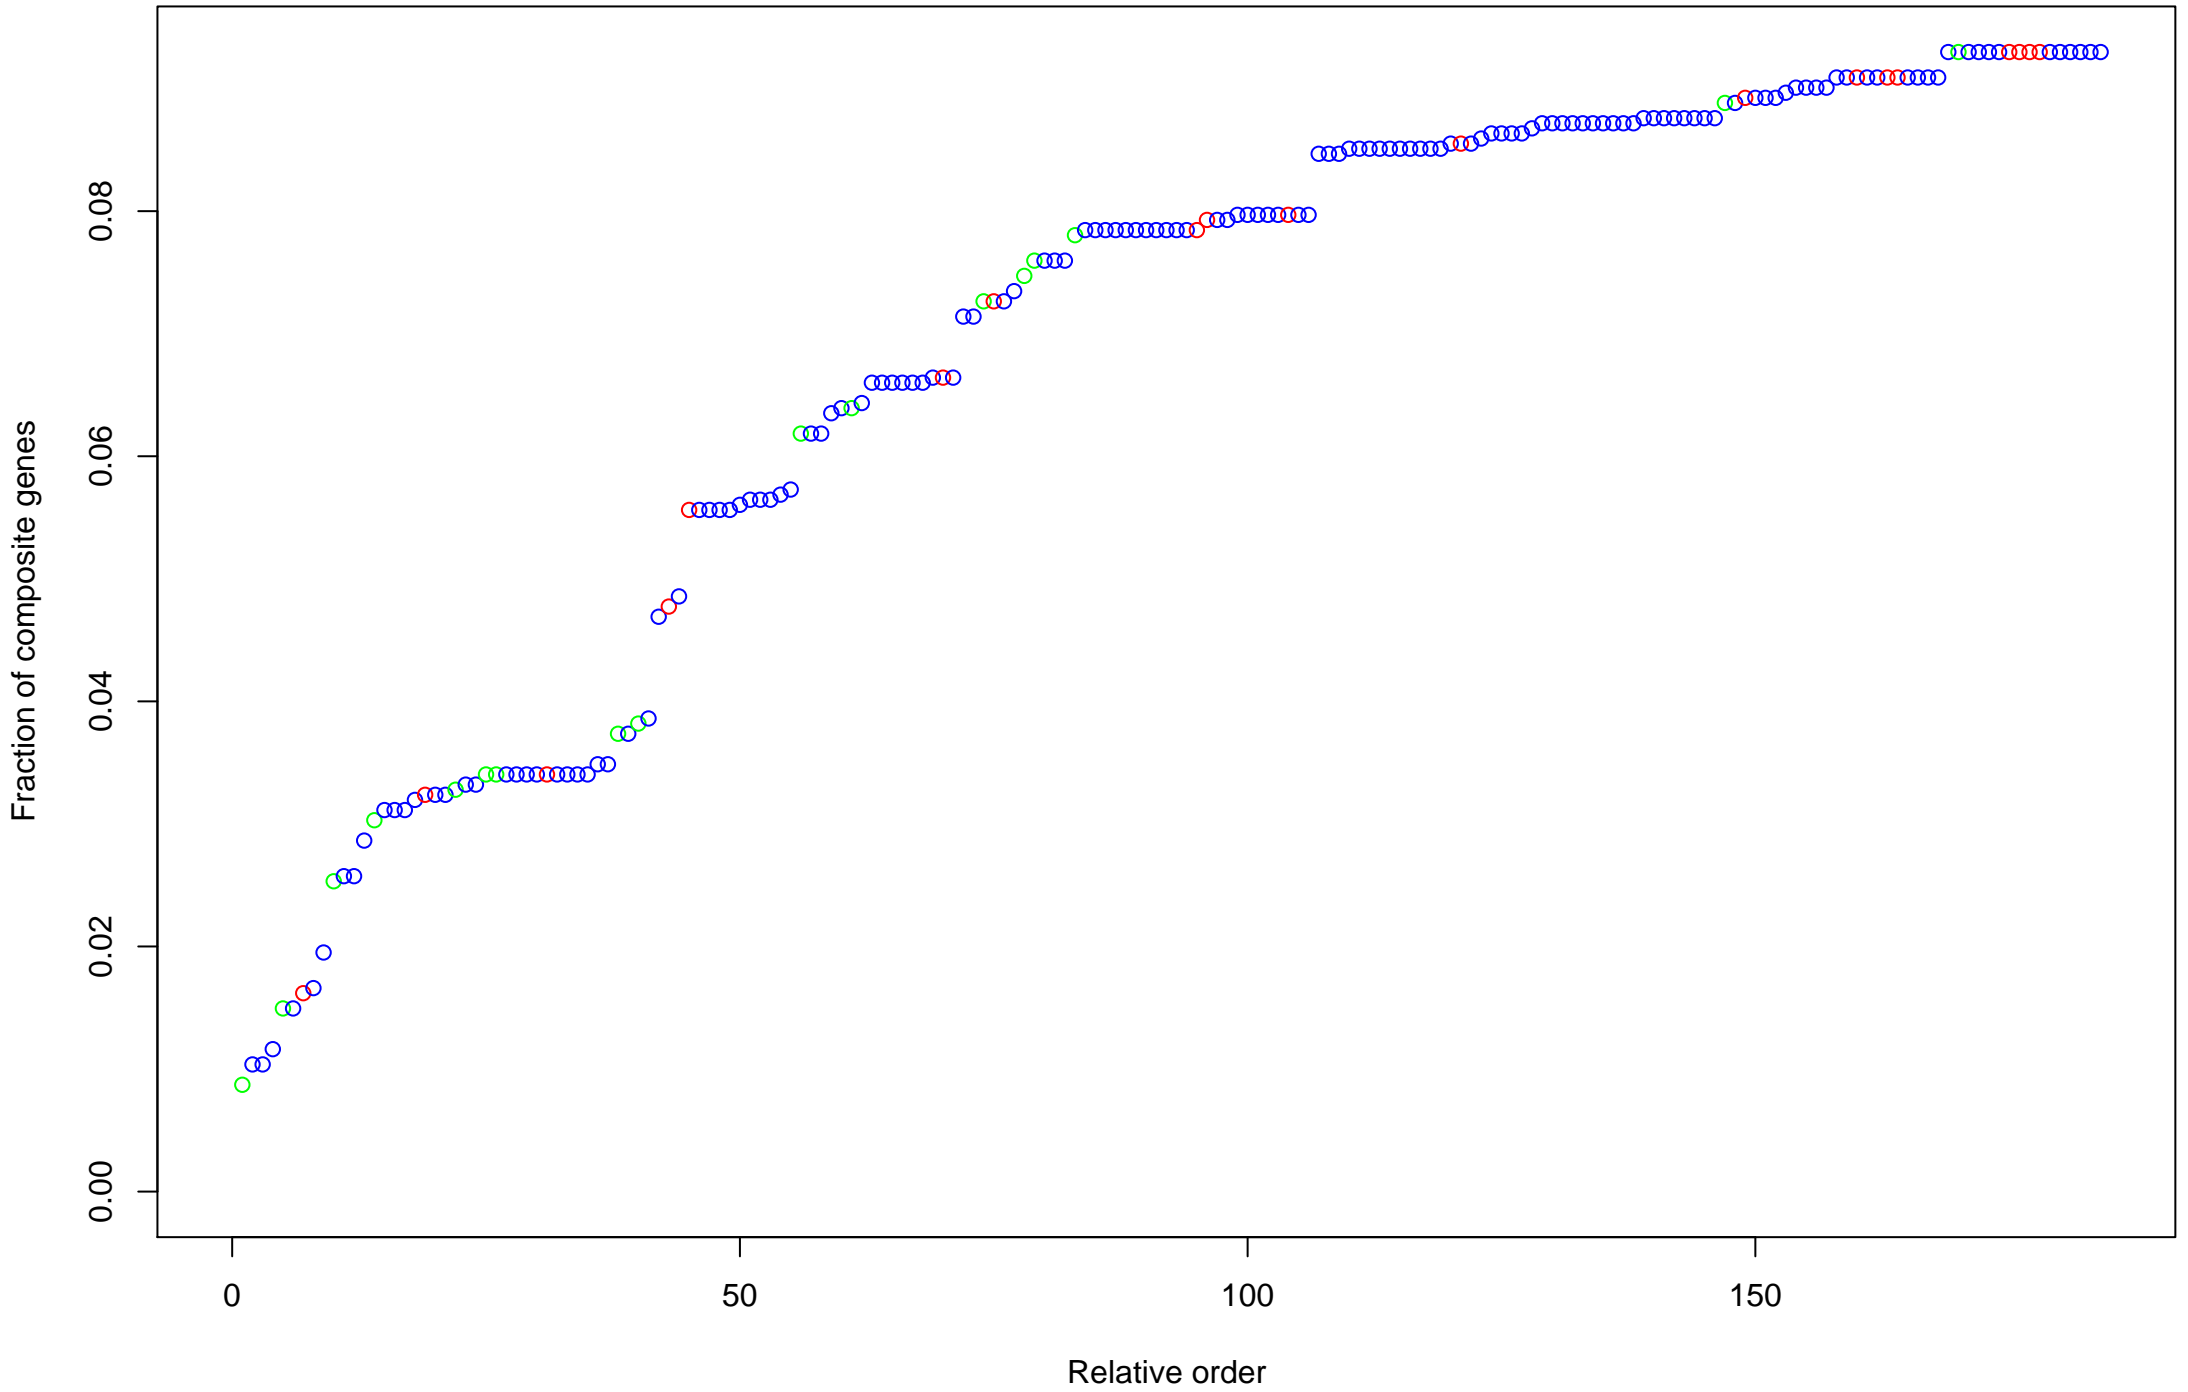

# BBUR-B31-01 (*Borrelia burgdorferi*)

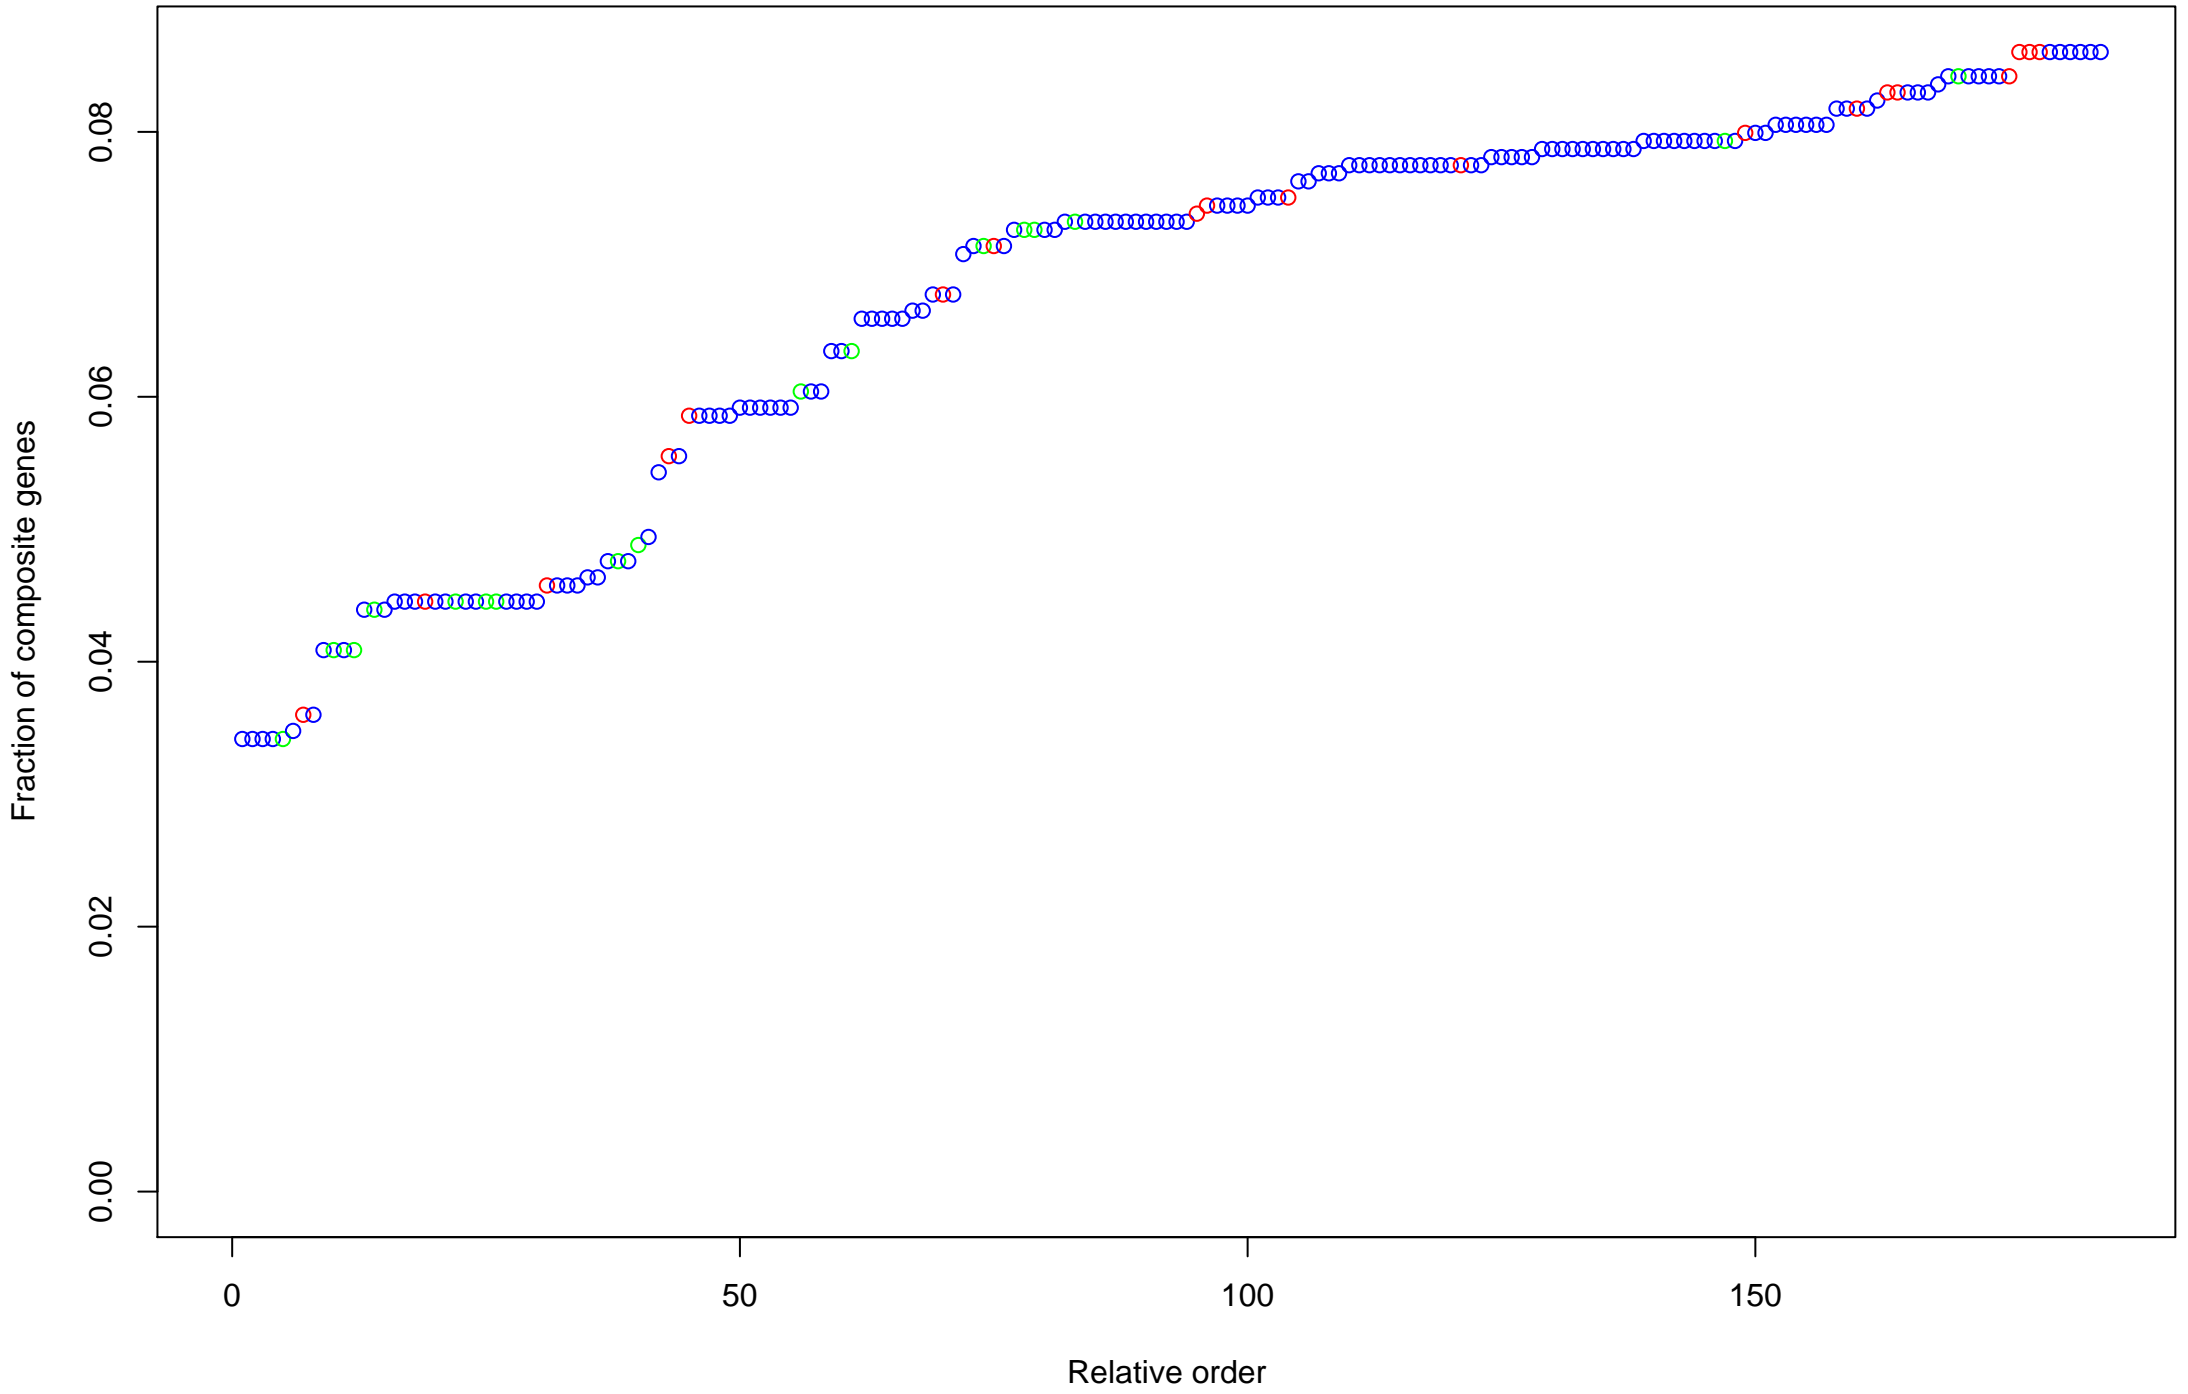

# AAEO-VF5-01 (*Aquifex aeolicus*)

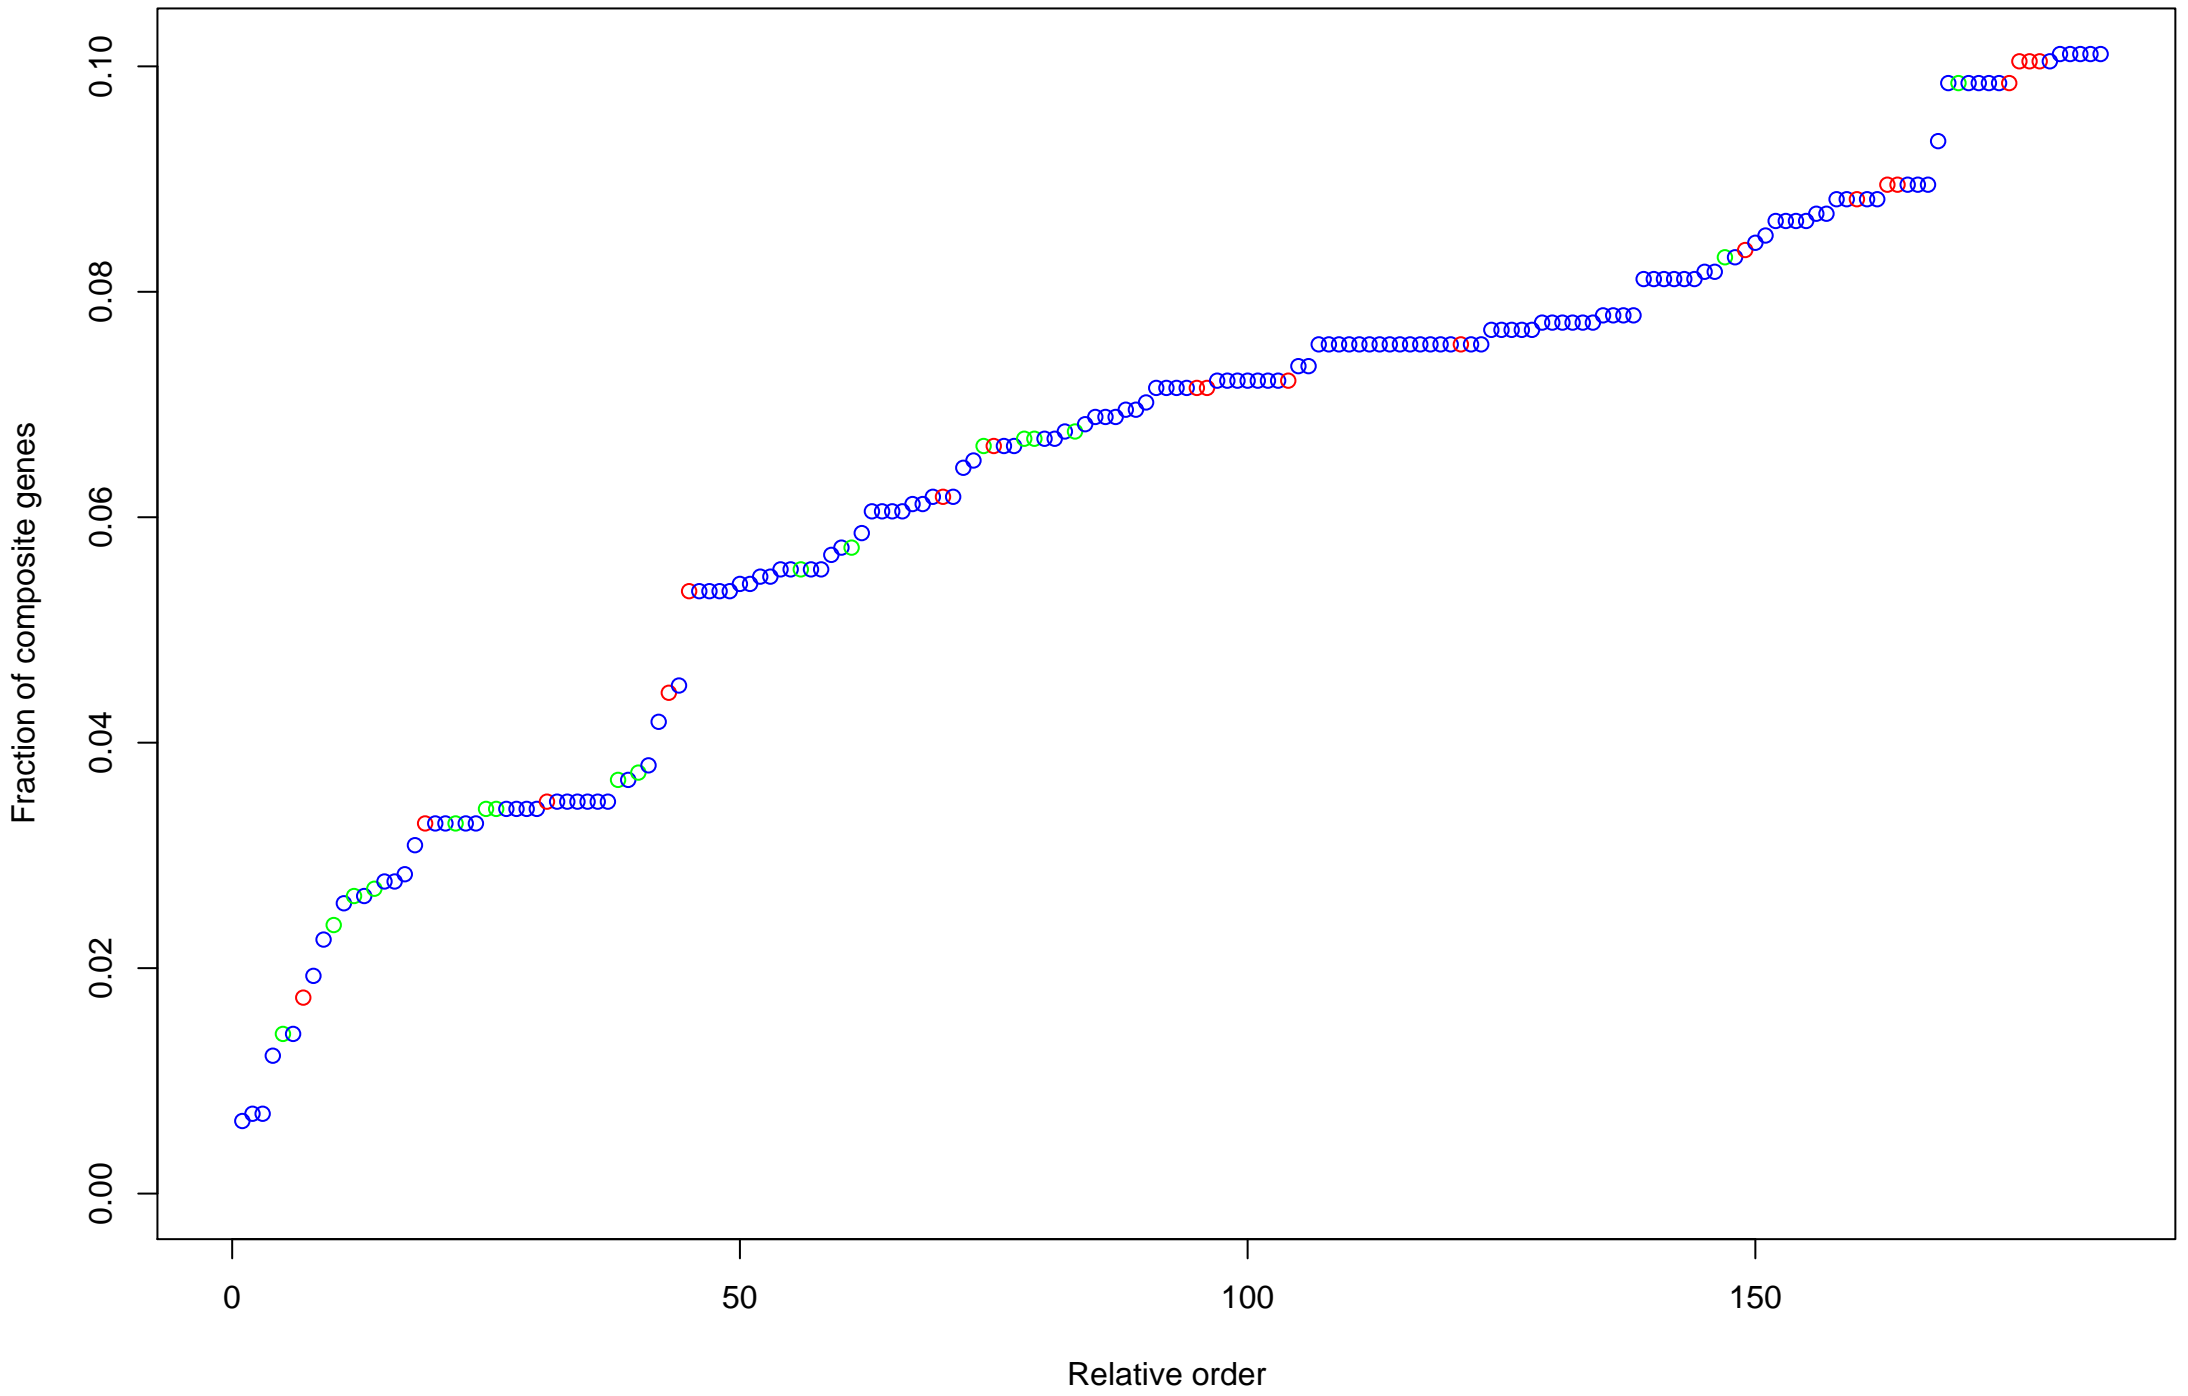

# PHOR-OT3-01 (*Pyrococcus horikoshii*)

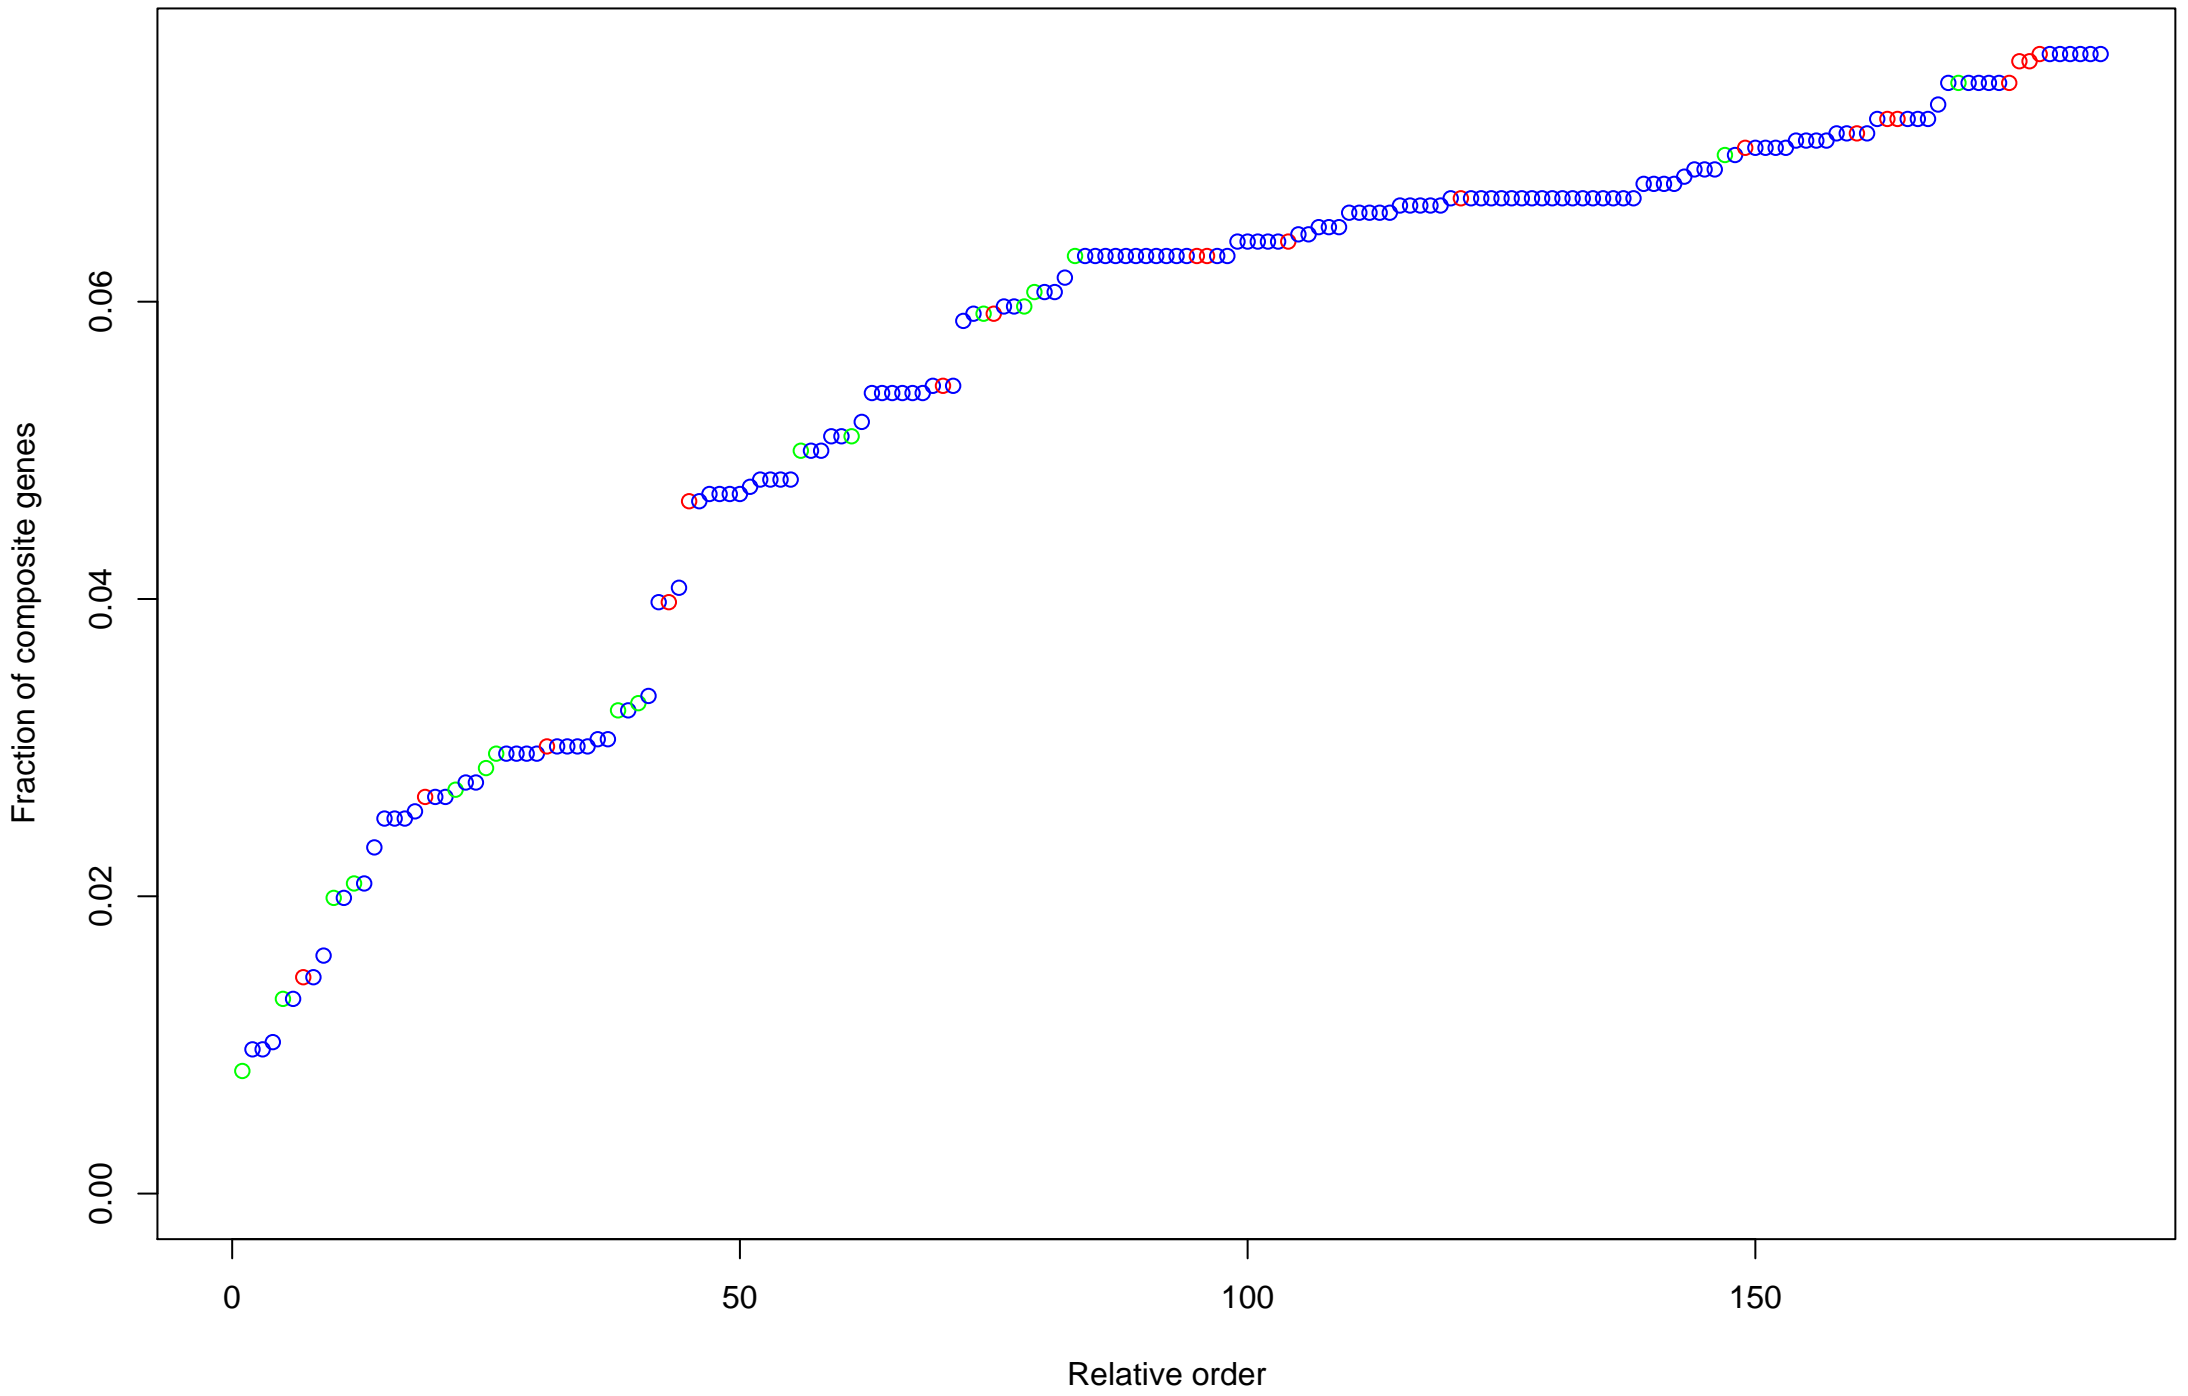

# MTUB-H37-01 (*Mycobacterium tuberculosis*)

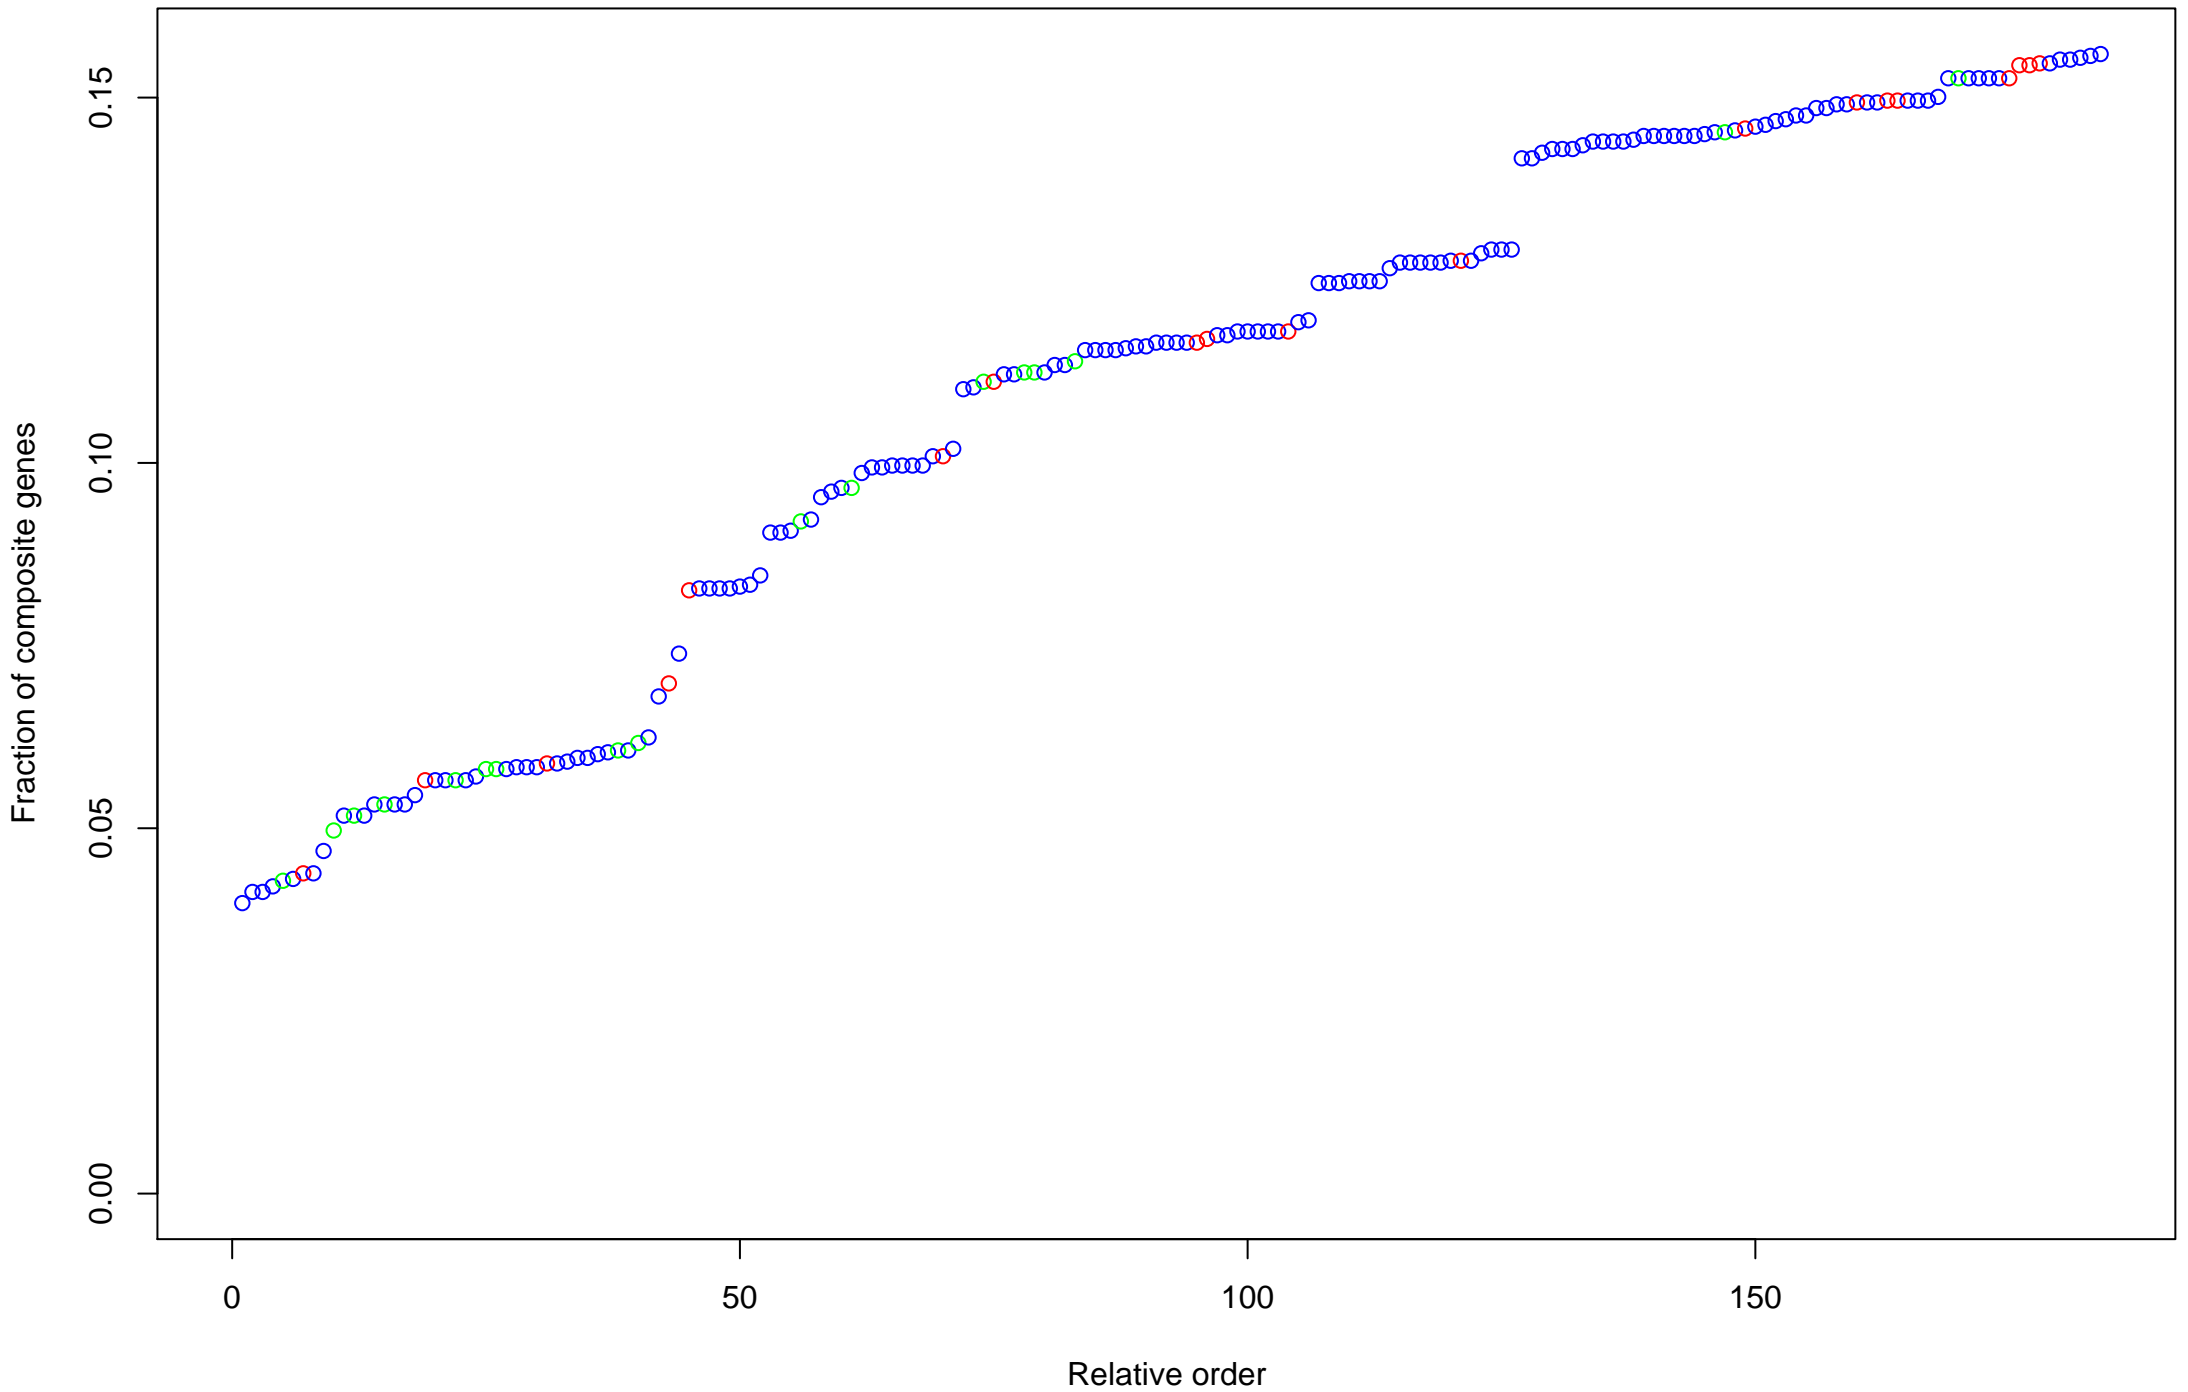

# TPAL-NIC-01 (*Treponema pallidum*)

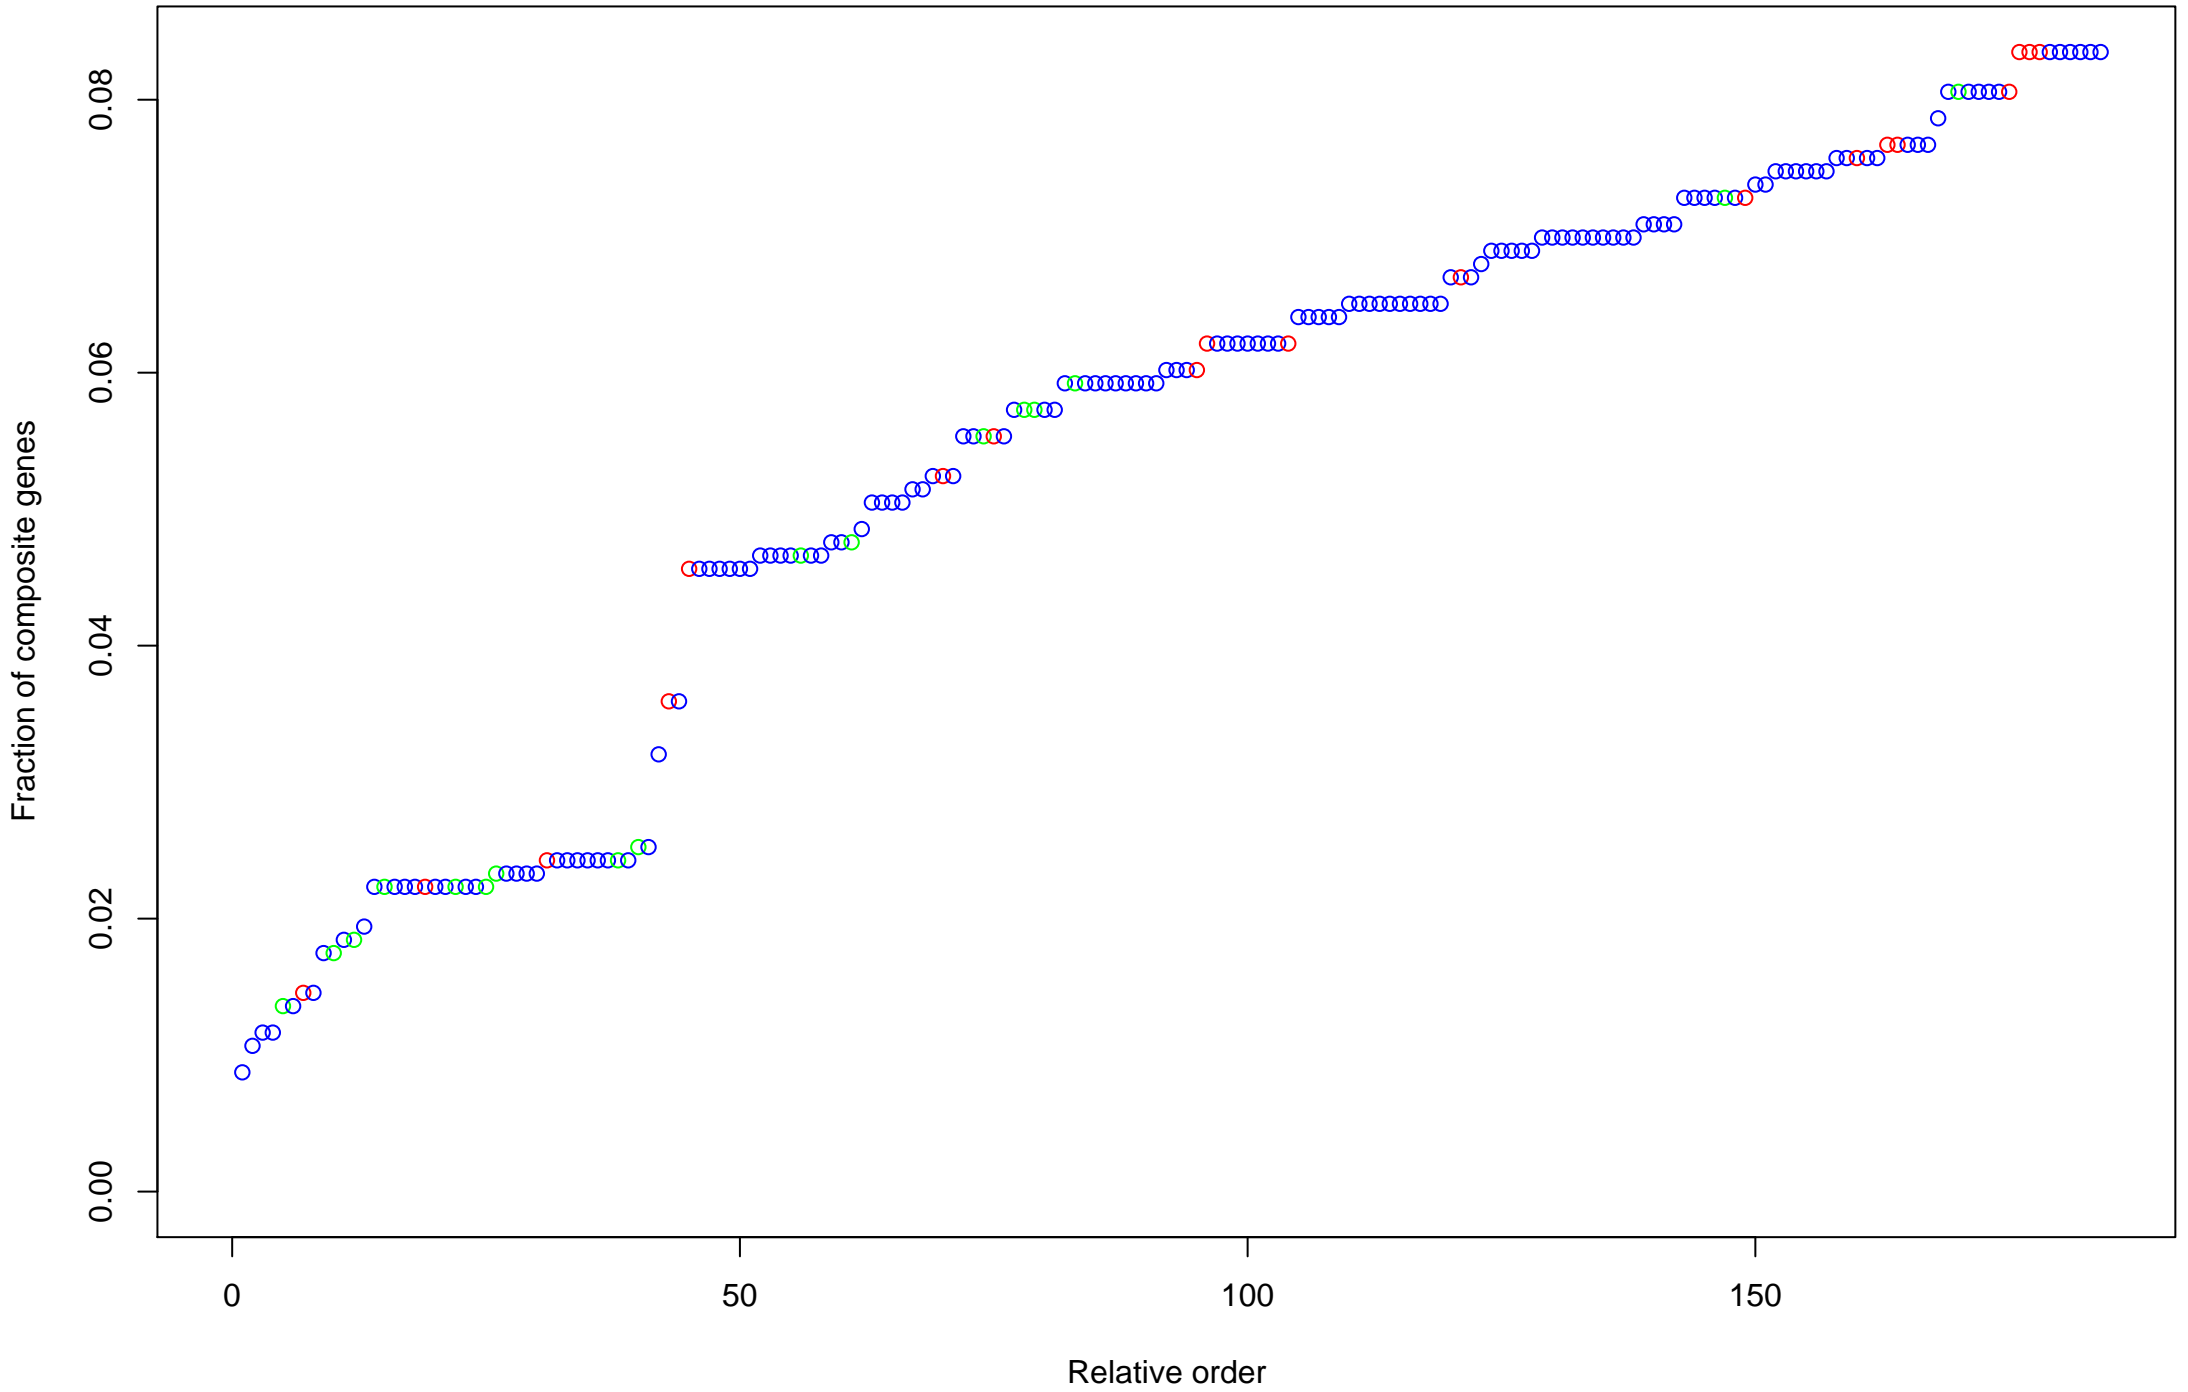



# CTRA-SVD-01 (*Chlamydia trachomatis*)

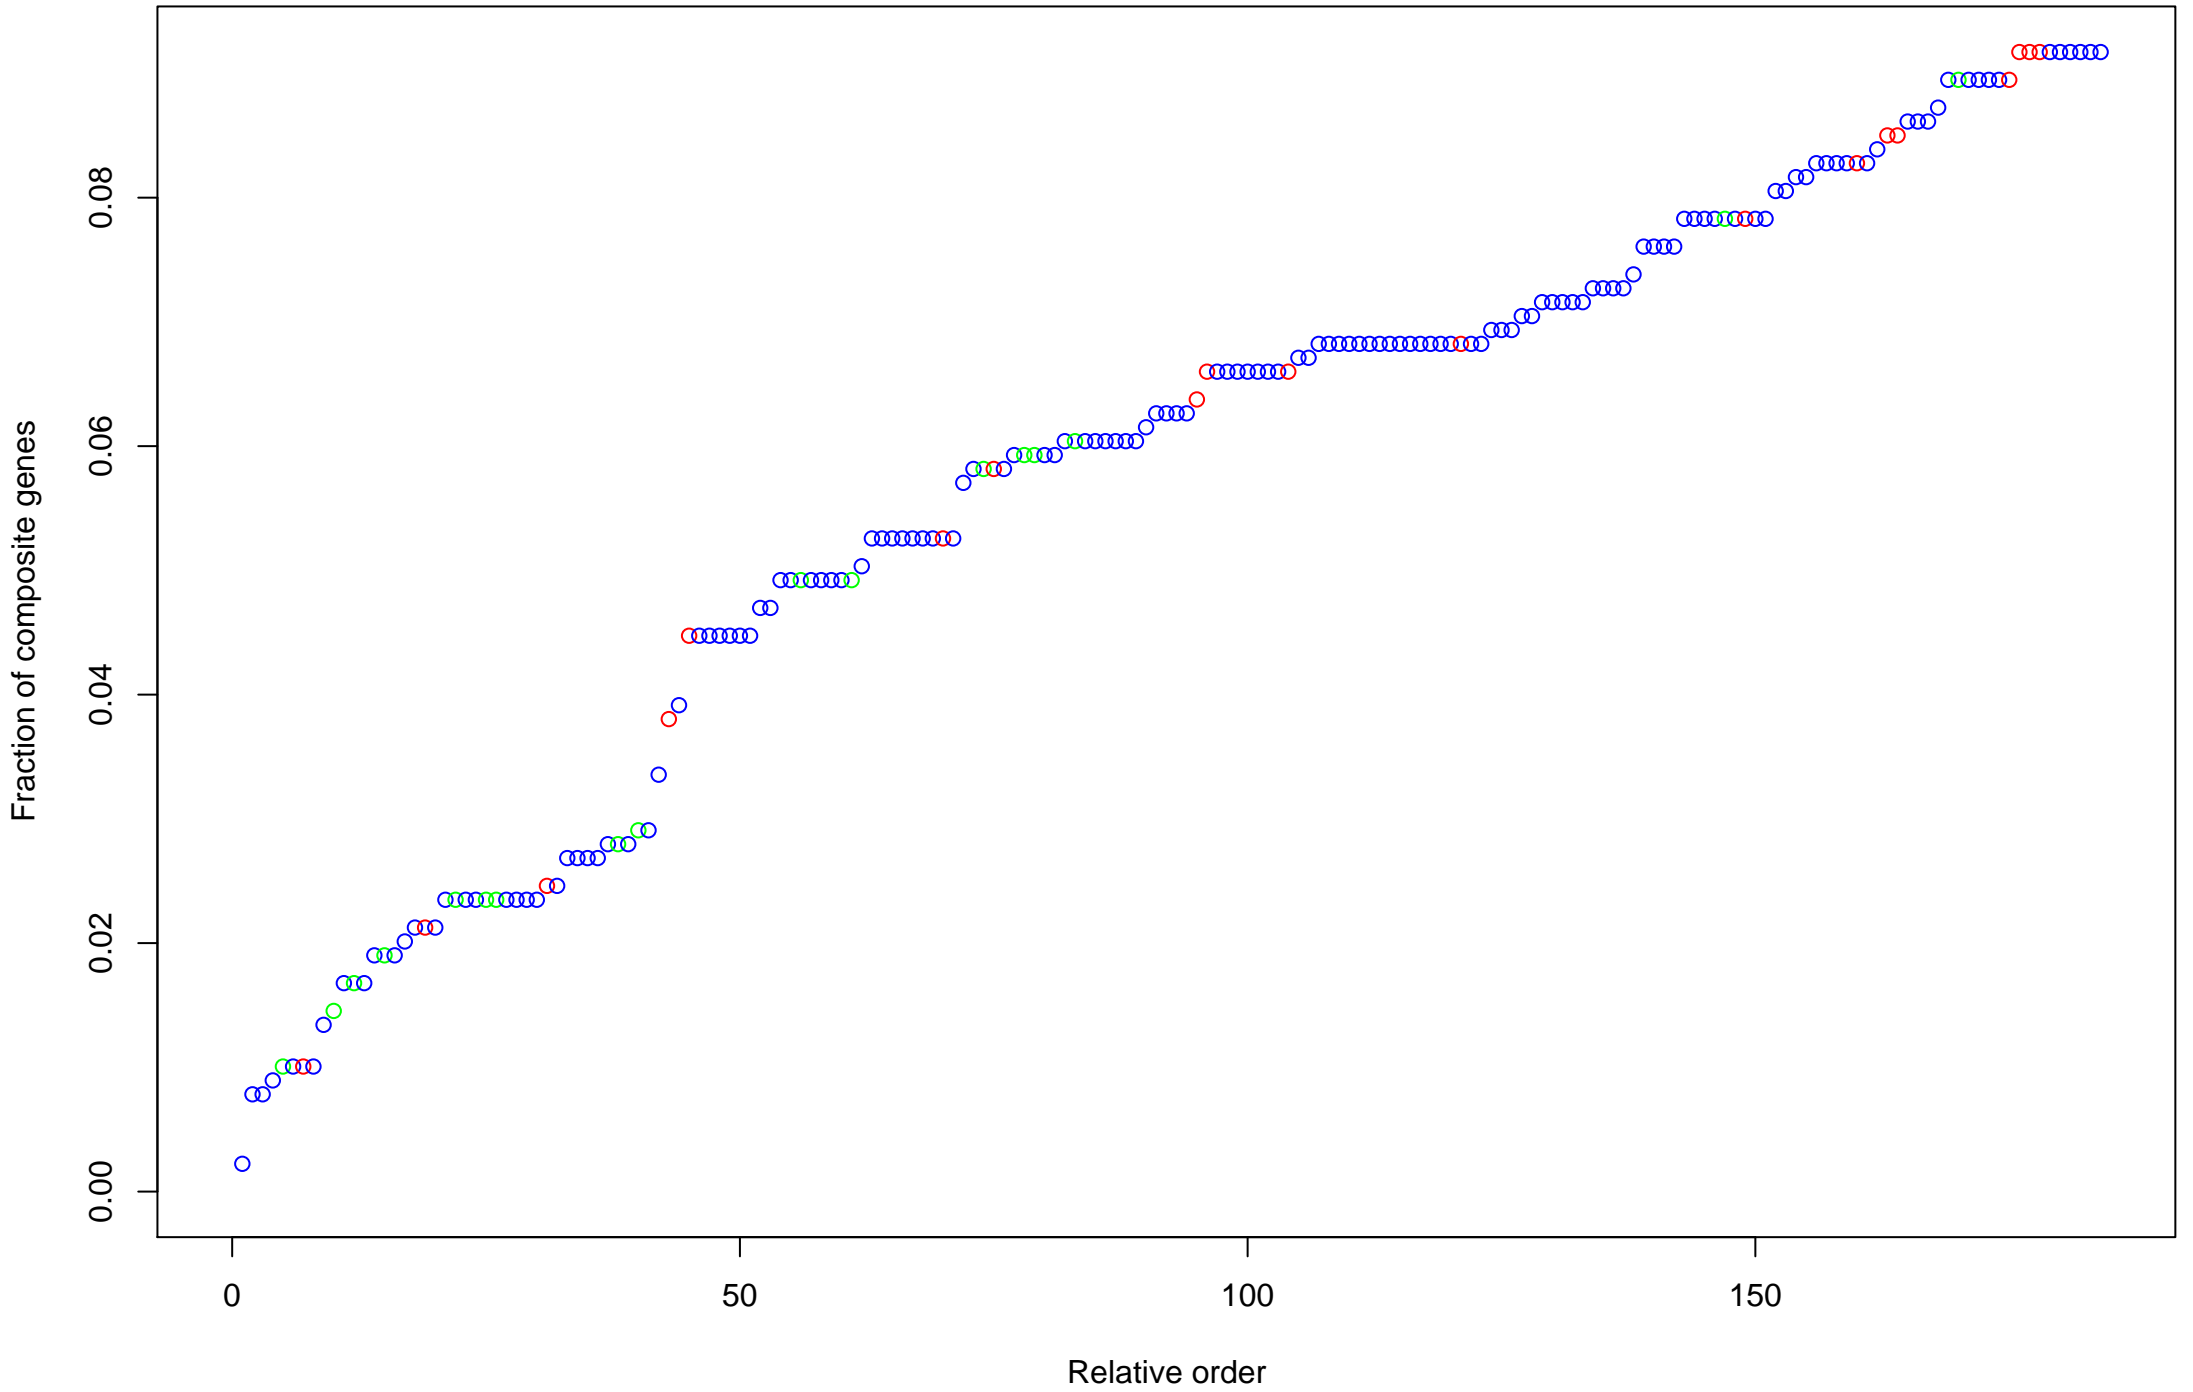

# RPRO-MAD-01 (*Rickettsia prowazekii*)

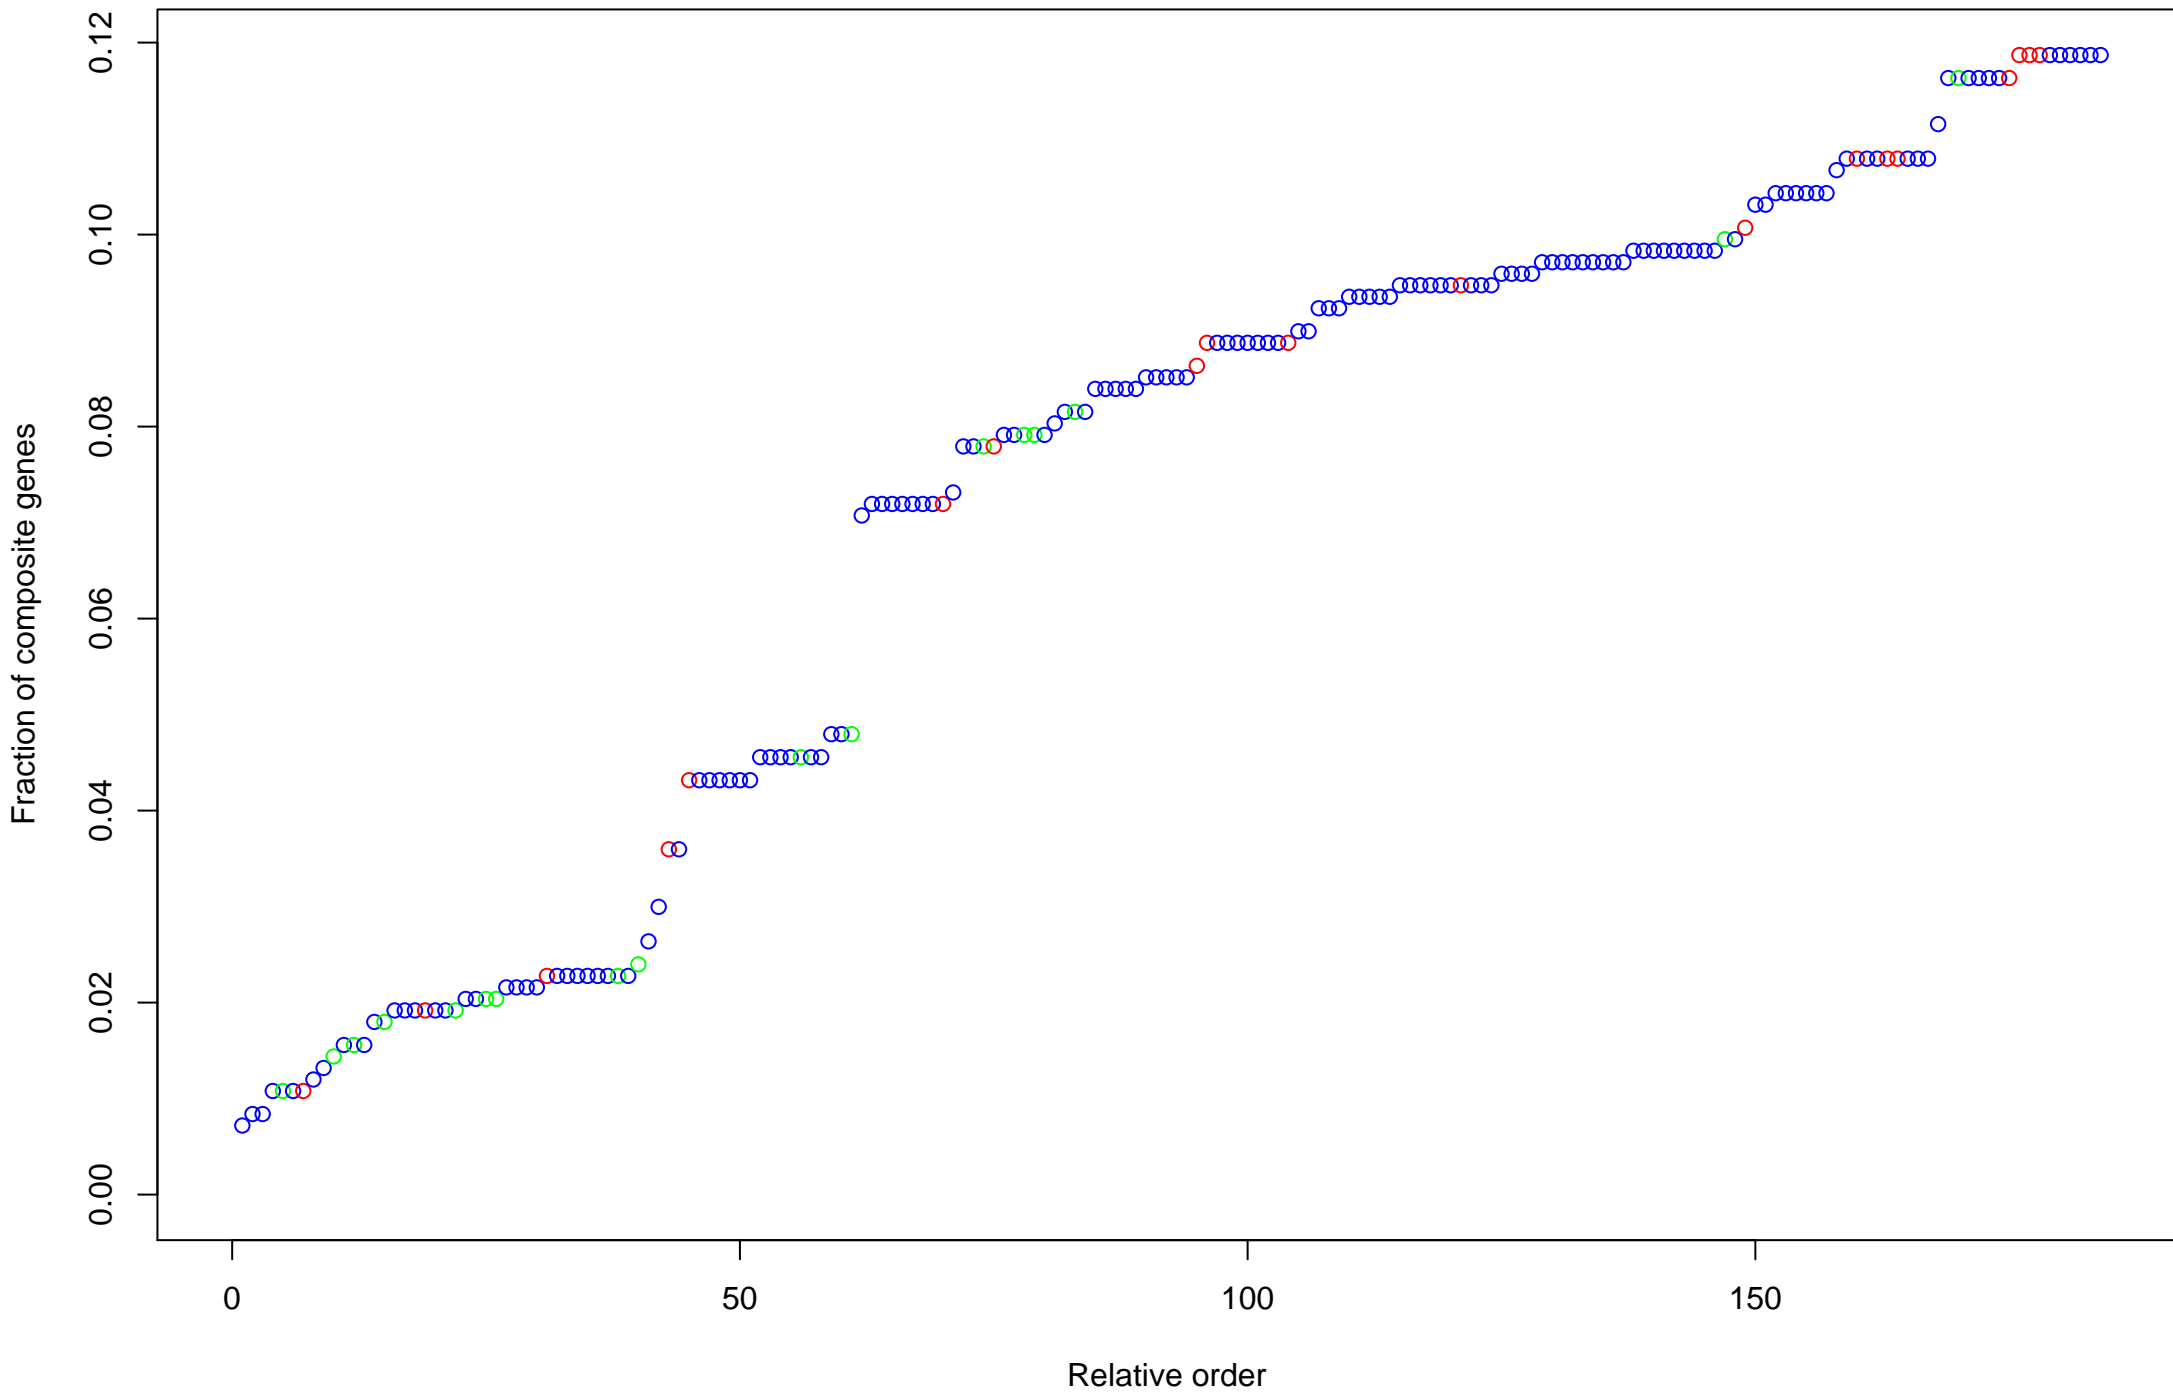

# CELE-XXX-01 (*Caenorhabditis elegans*)

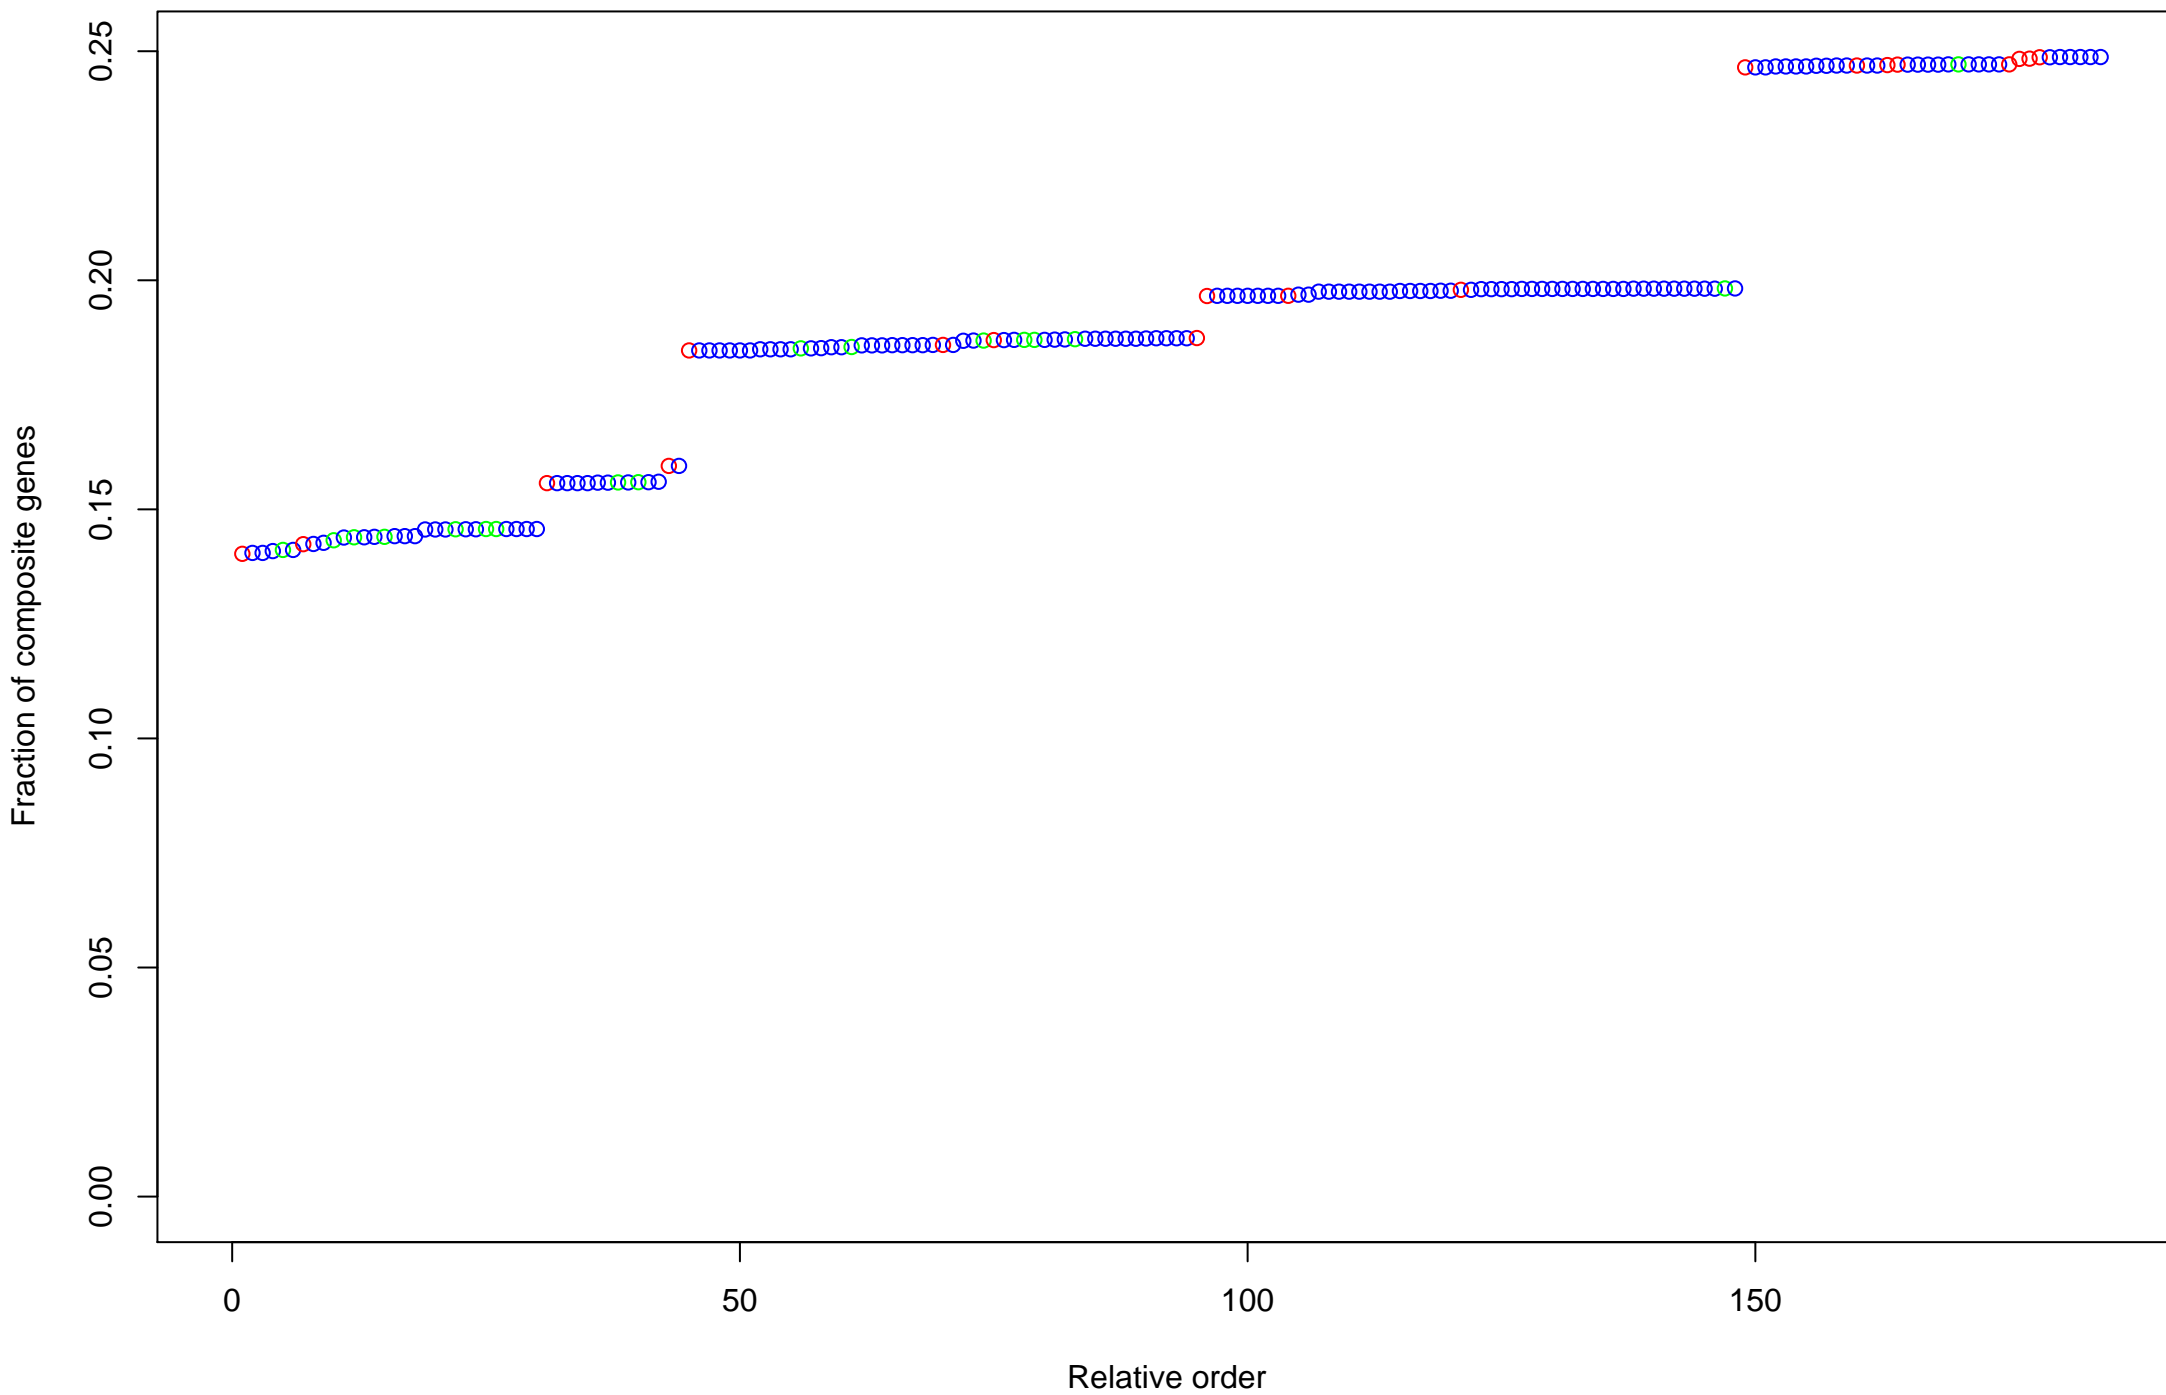

# HPYL-J99-01 (*Helicobacter pylori*)

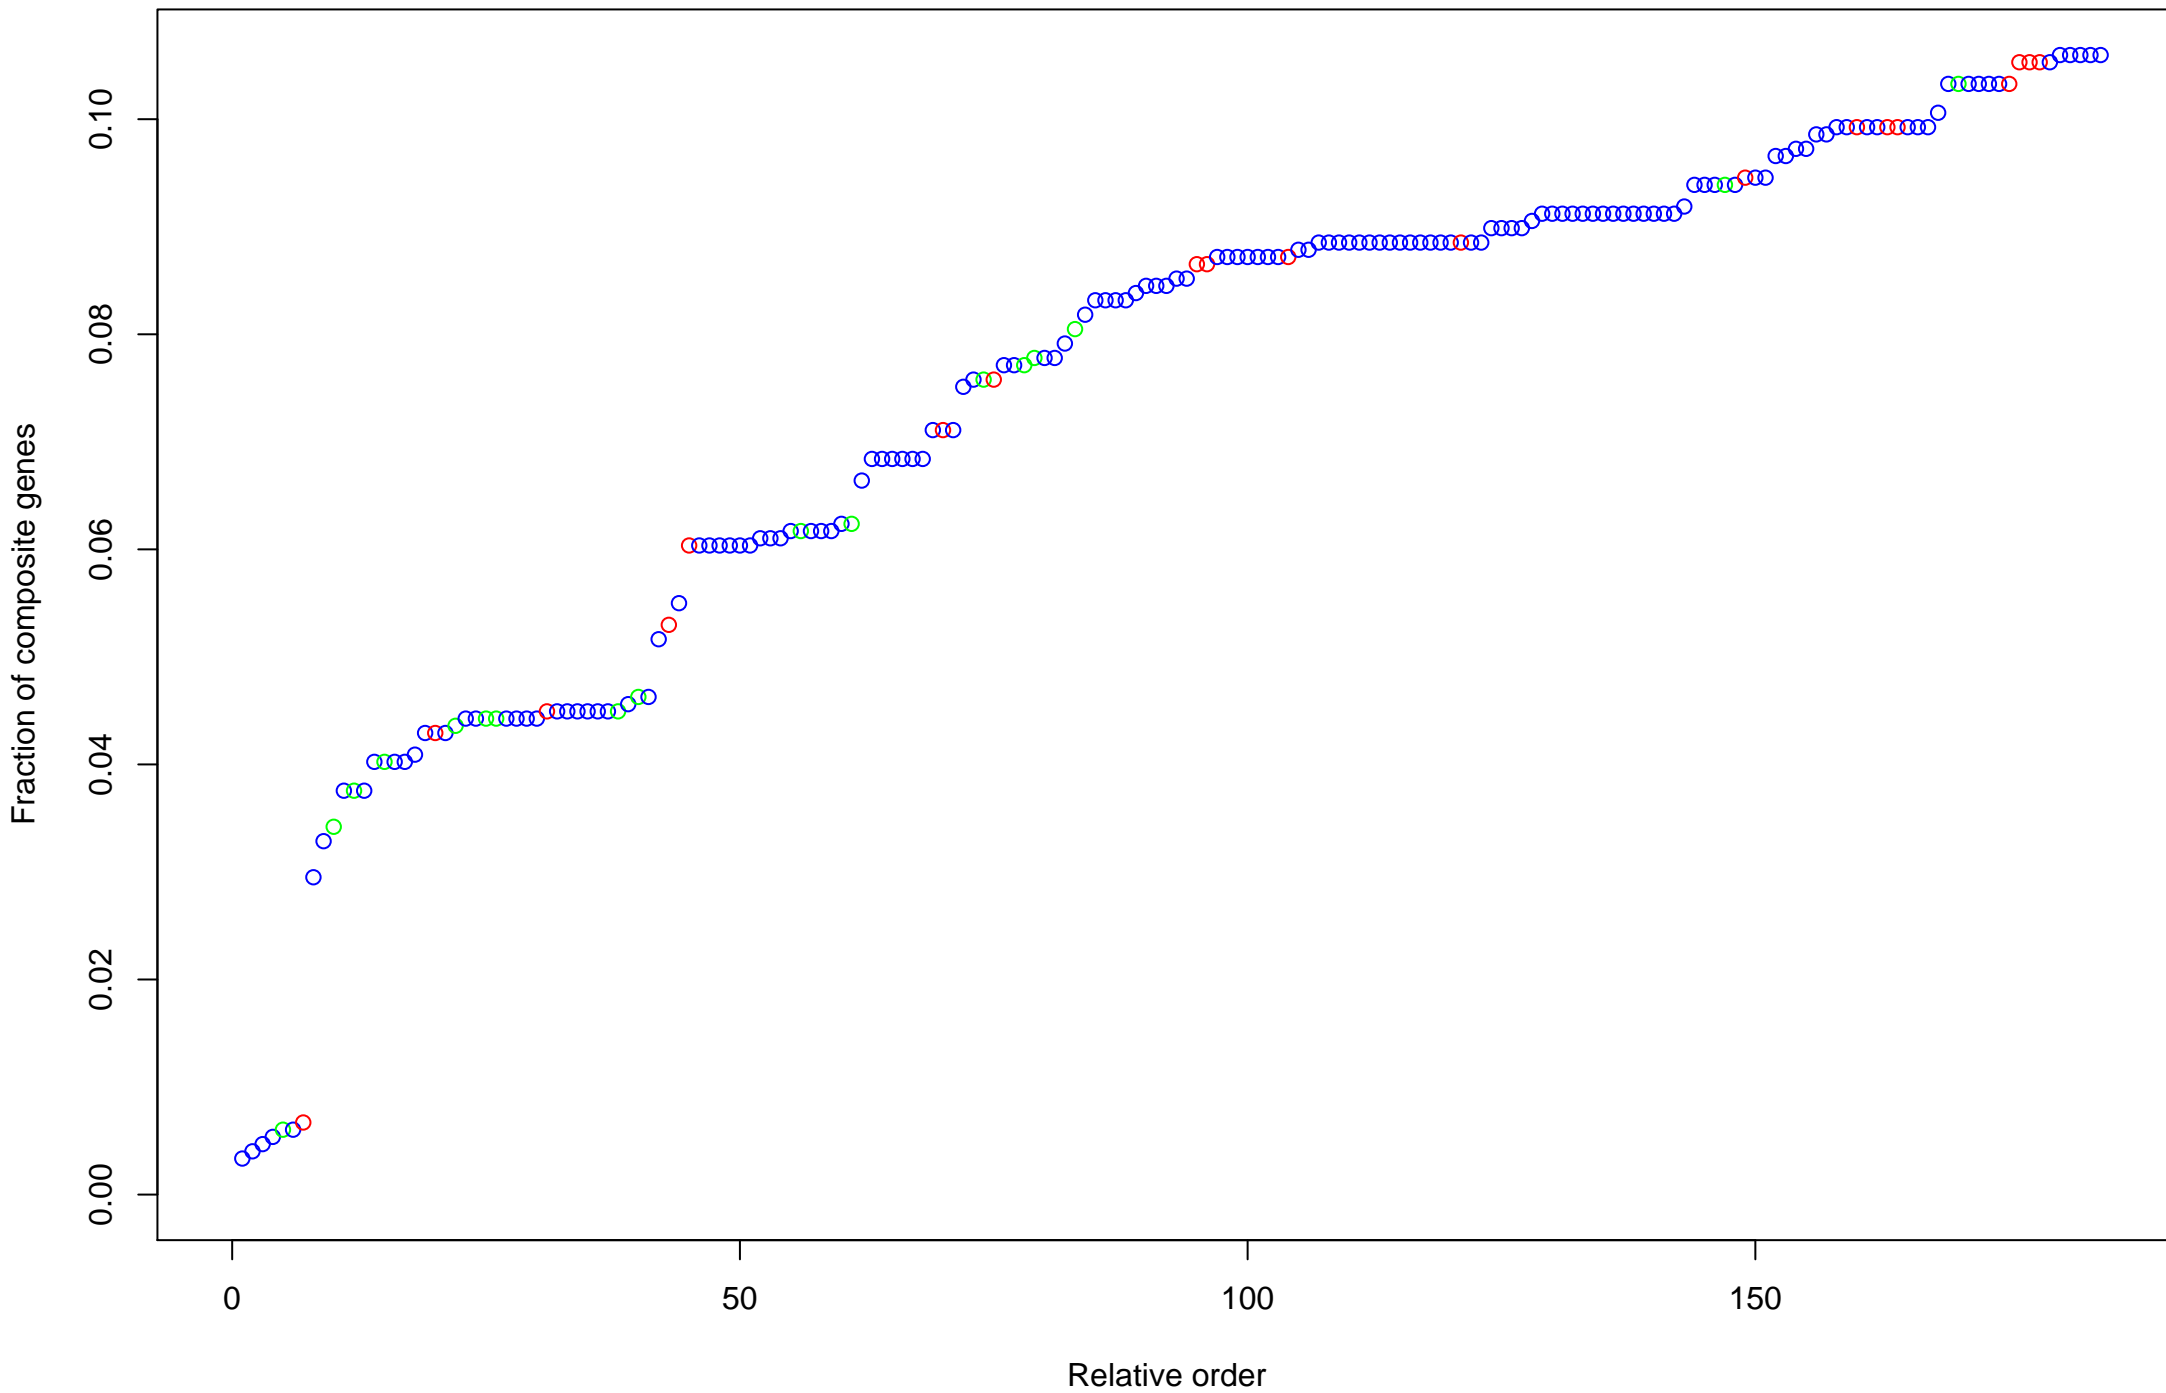

# CPNE-CWL-01 (*Chlamydia pneumoniae*)

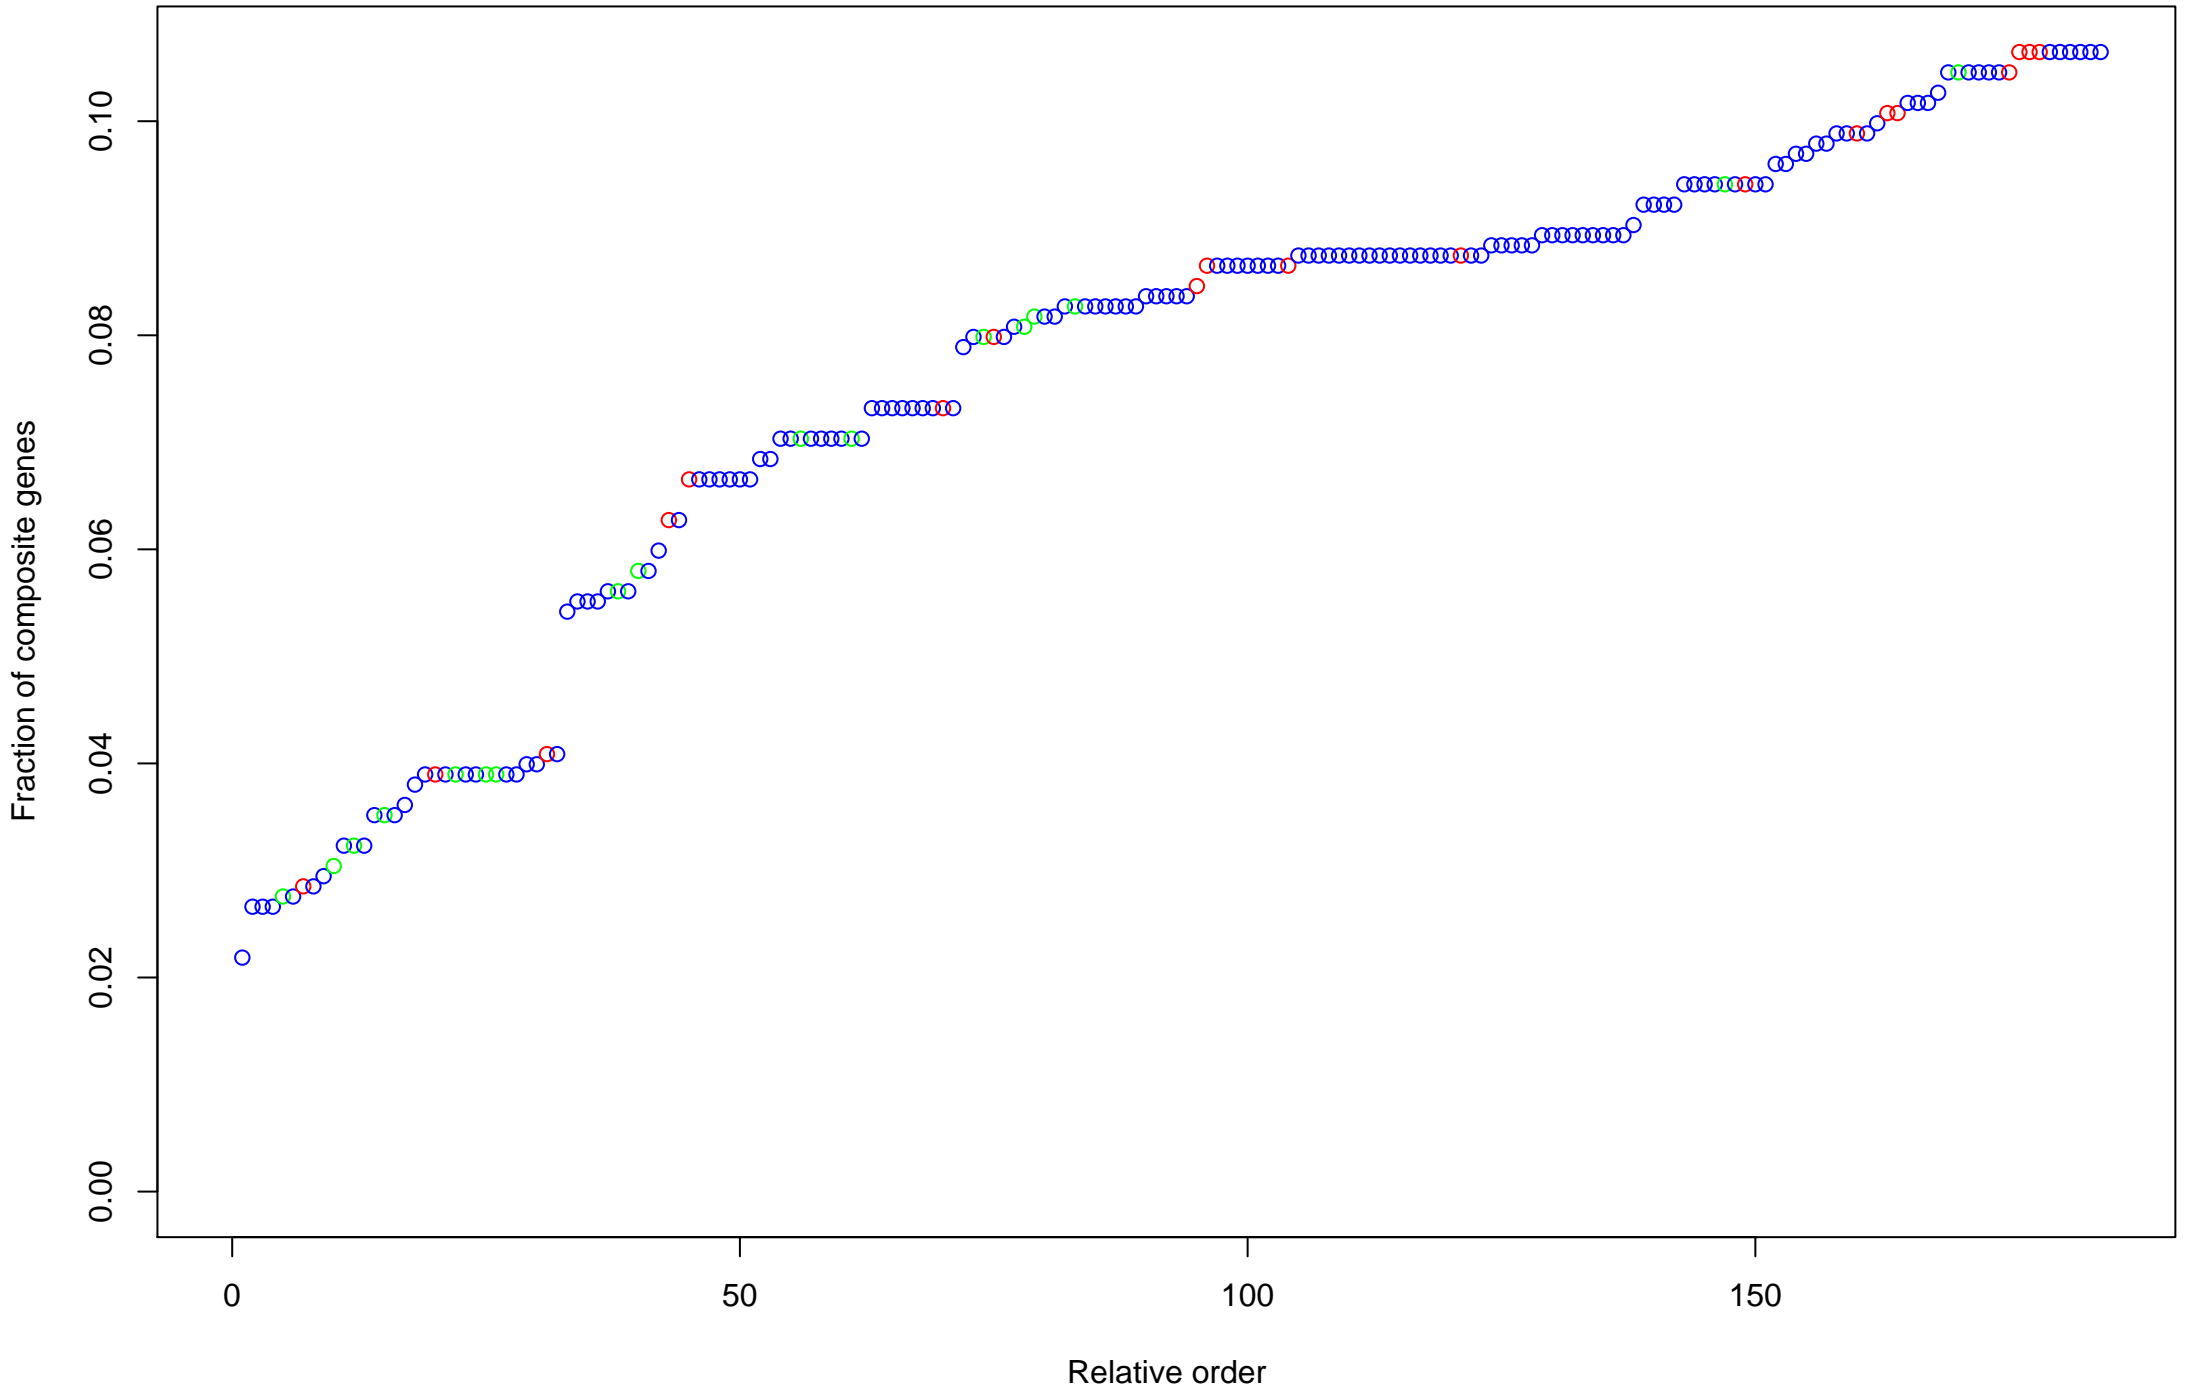

# APER-XK1-01 (*Aeropyrum pernix*)

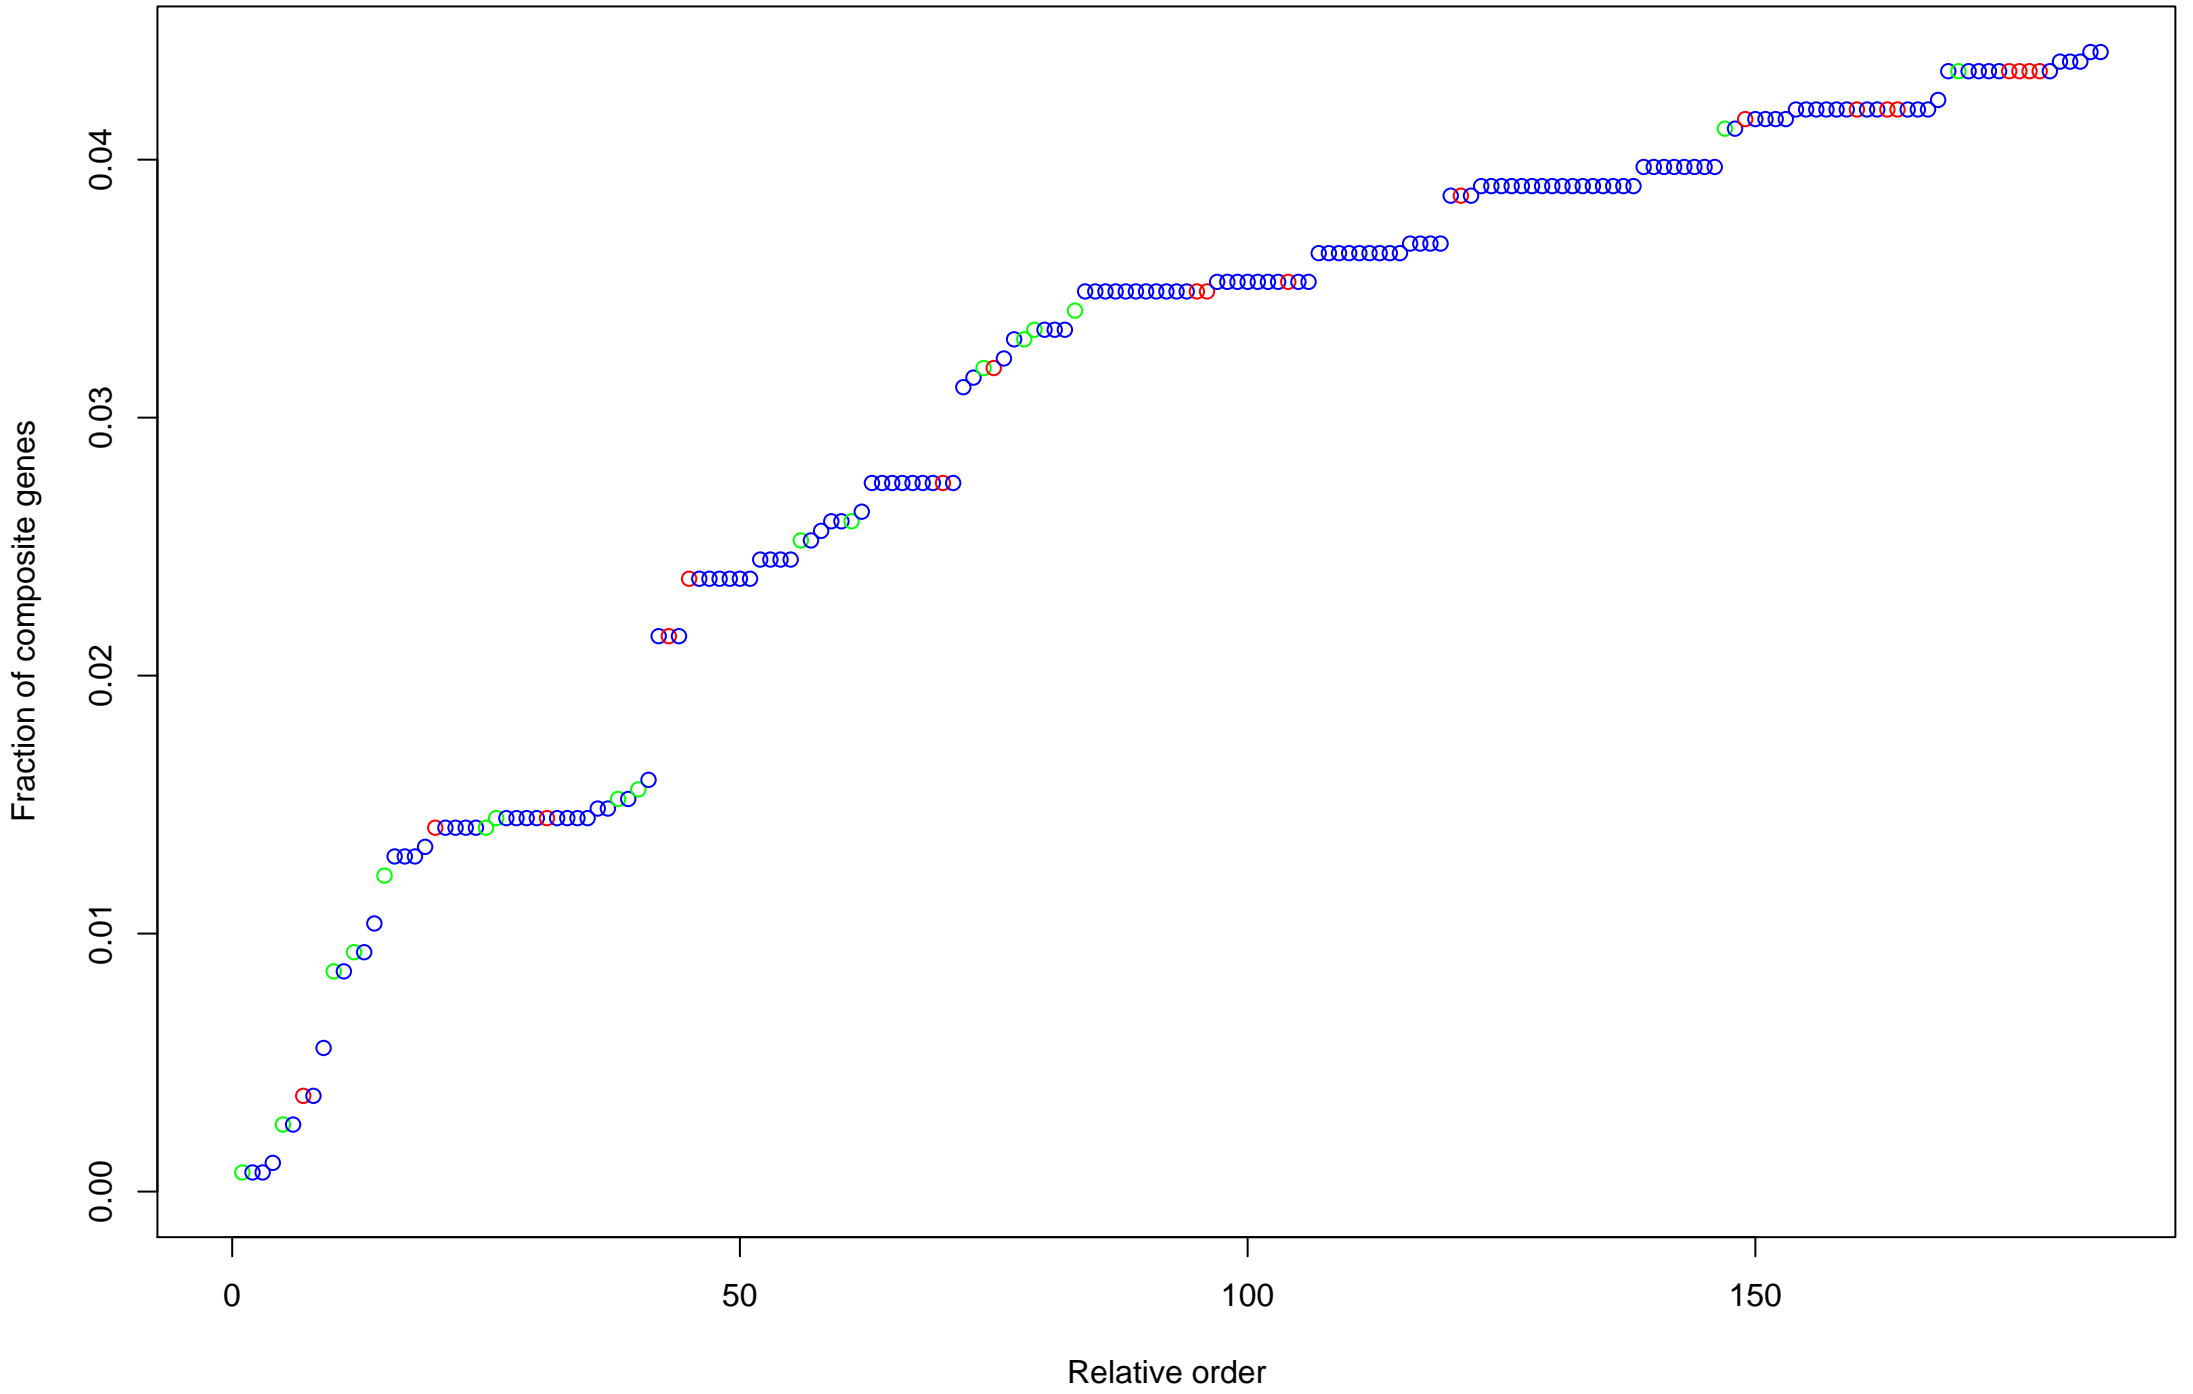

# TMAR-MSB-01 (*Thermotoga maritima*)

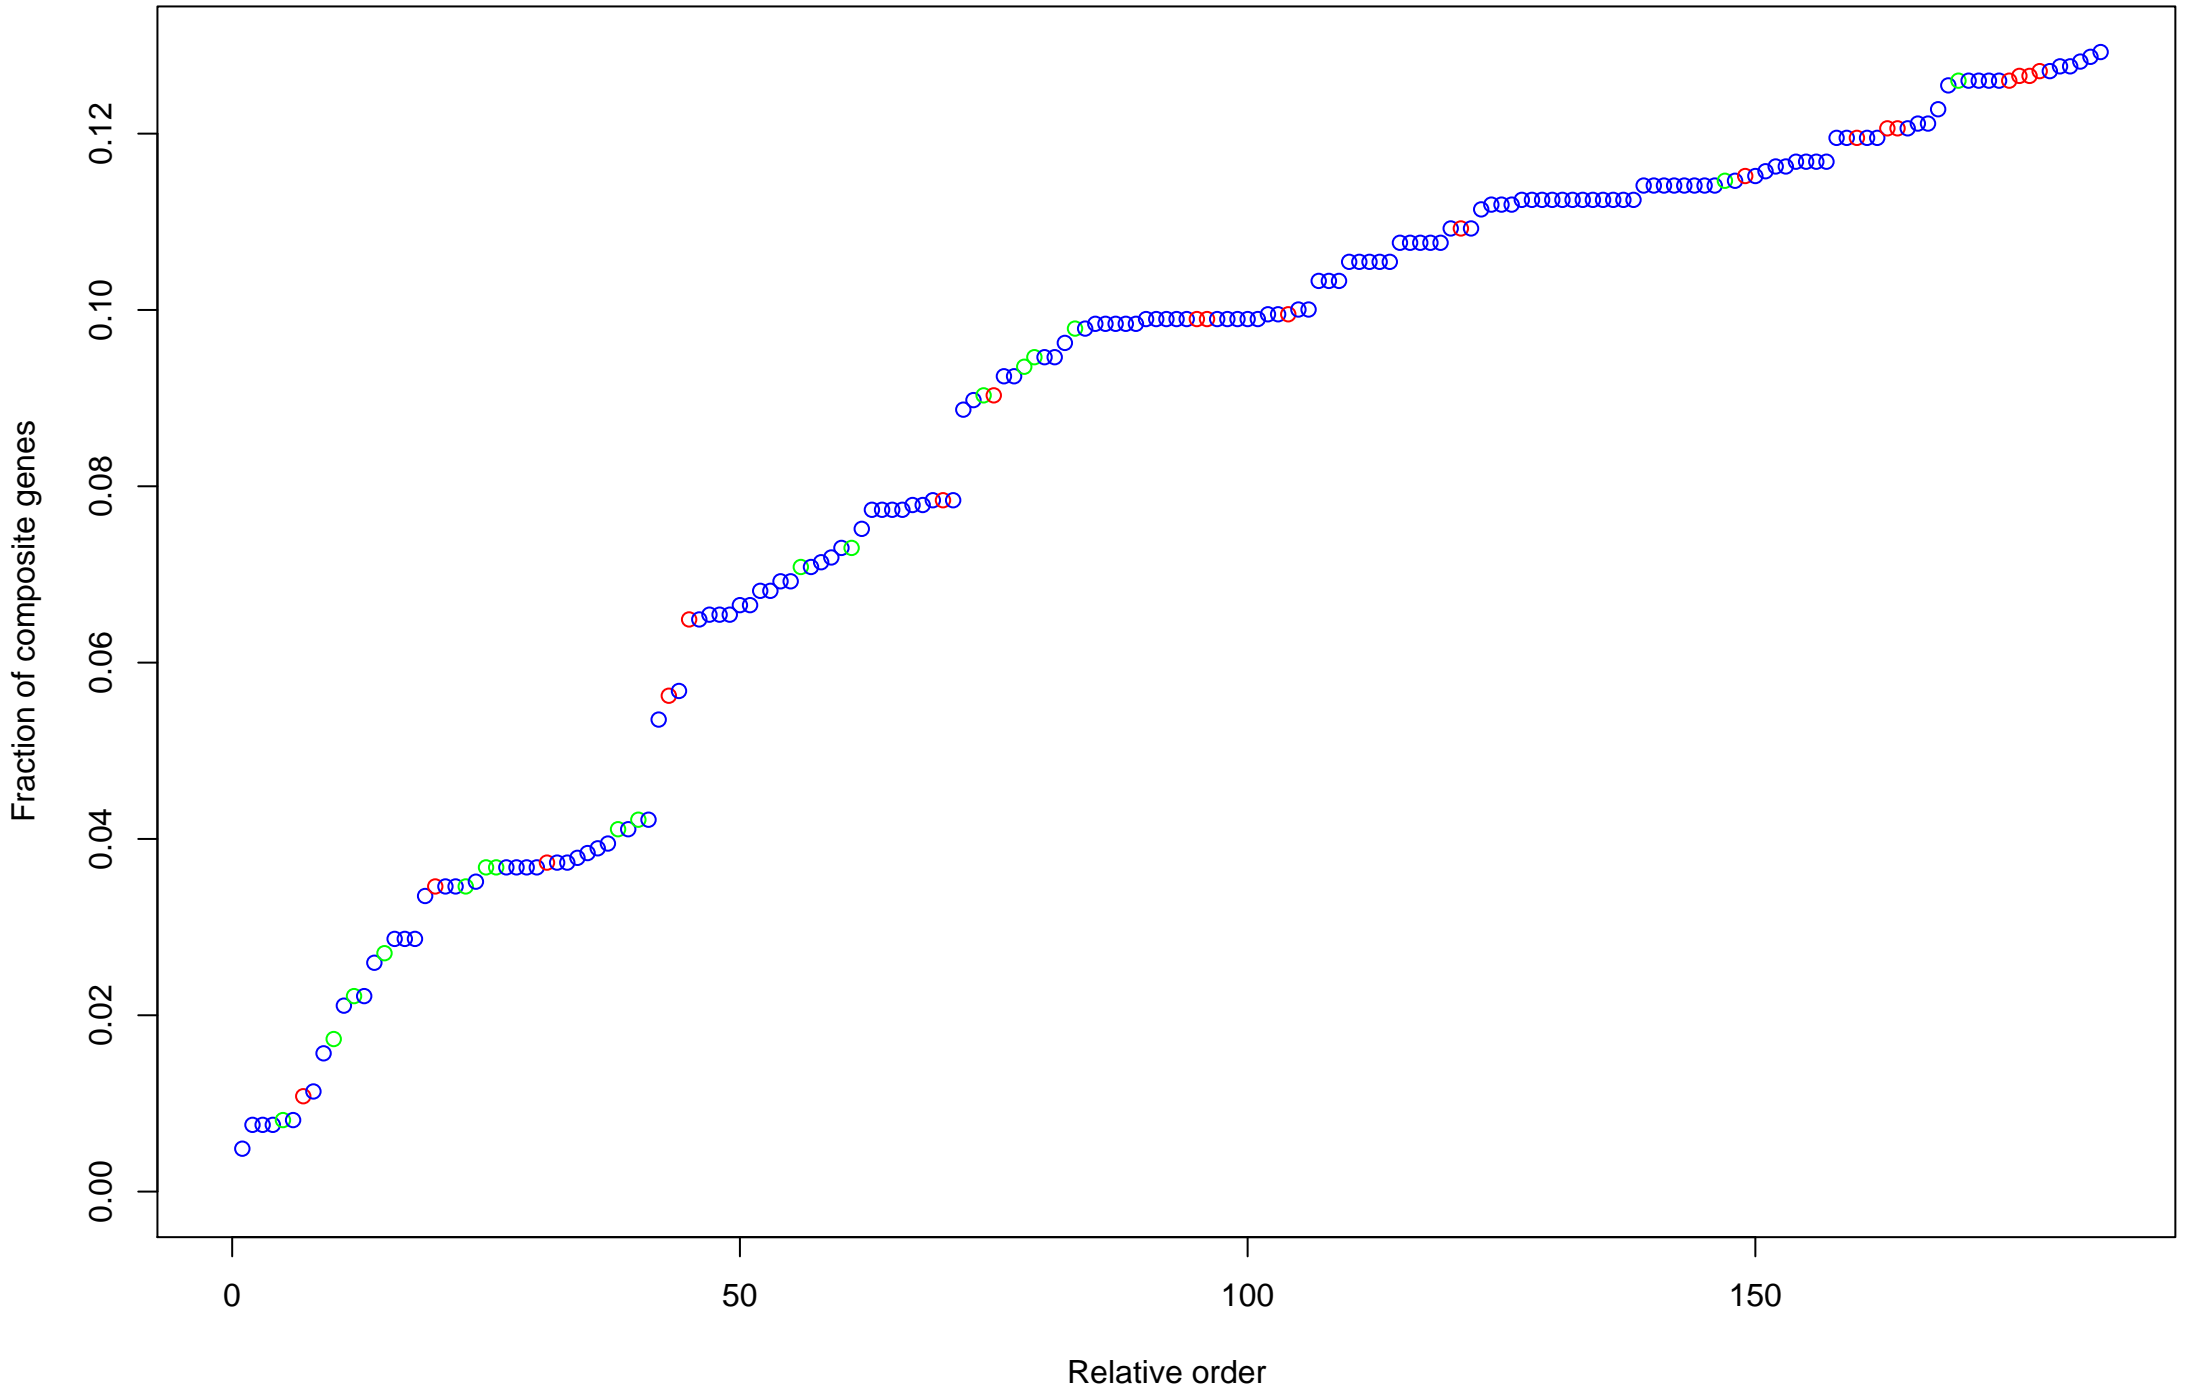

# DRAD-XR1-01 (*Deinococcus radiodurans*)

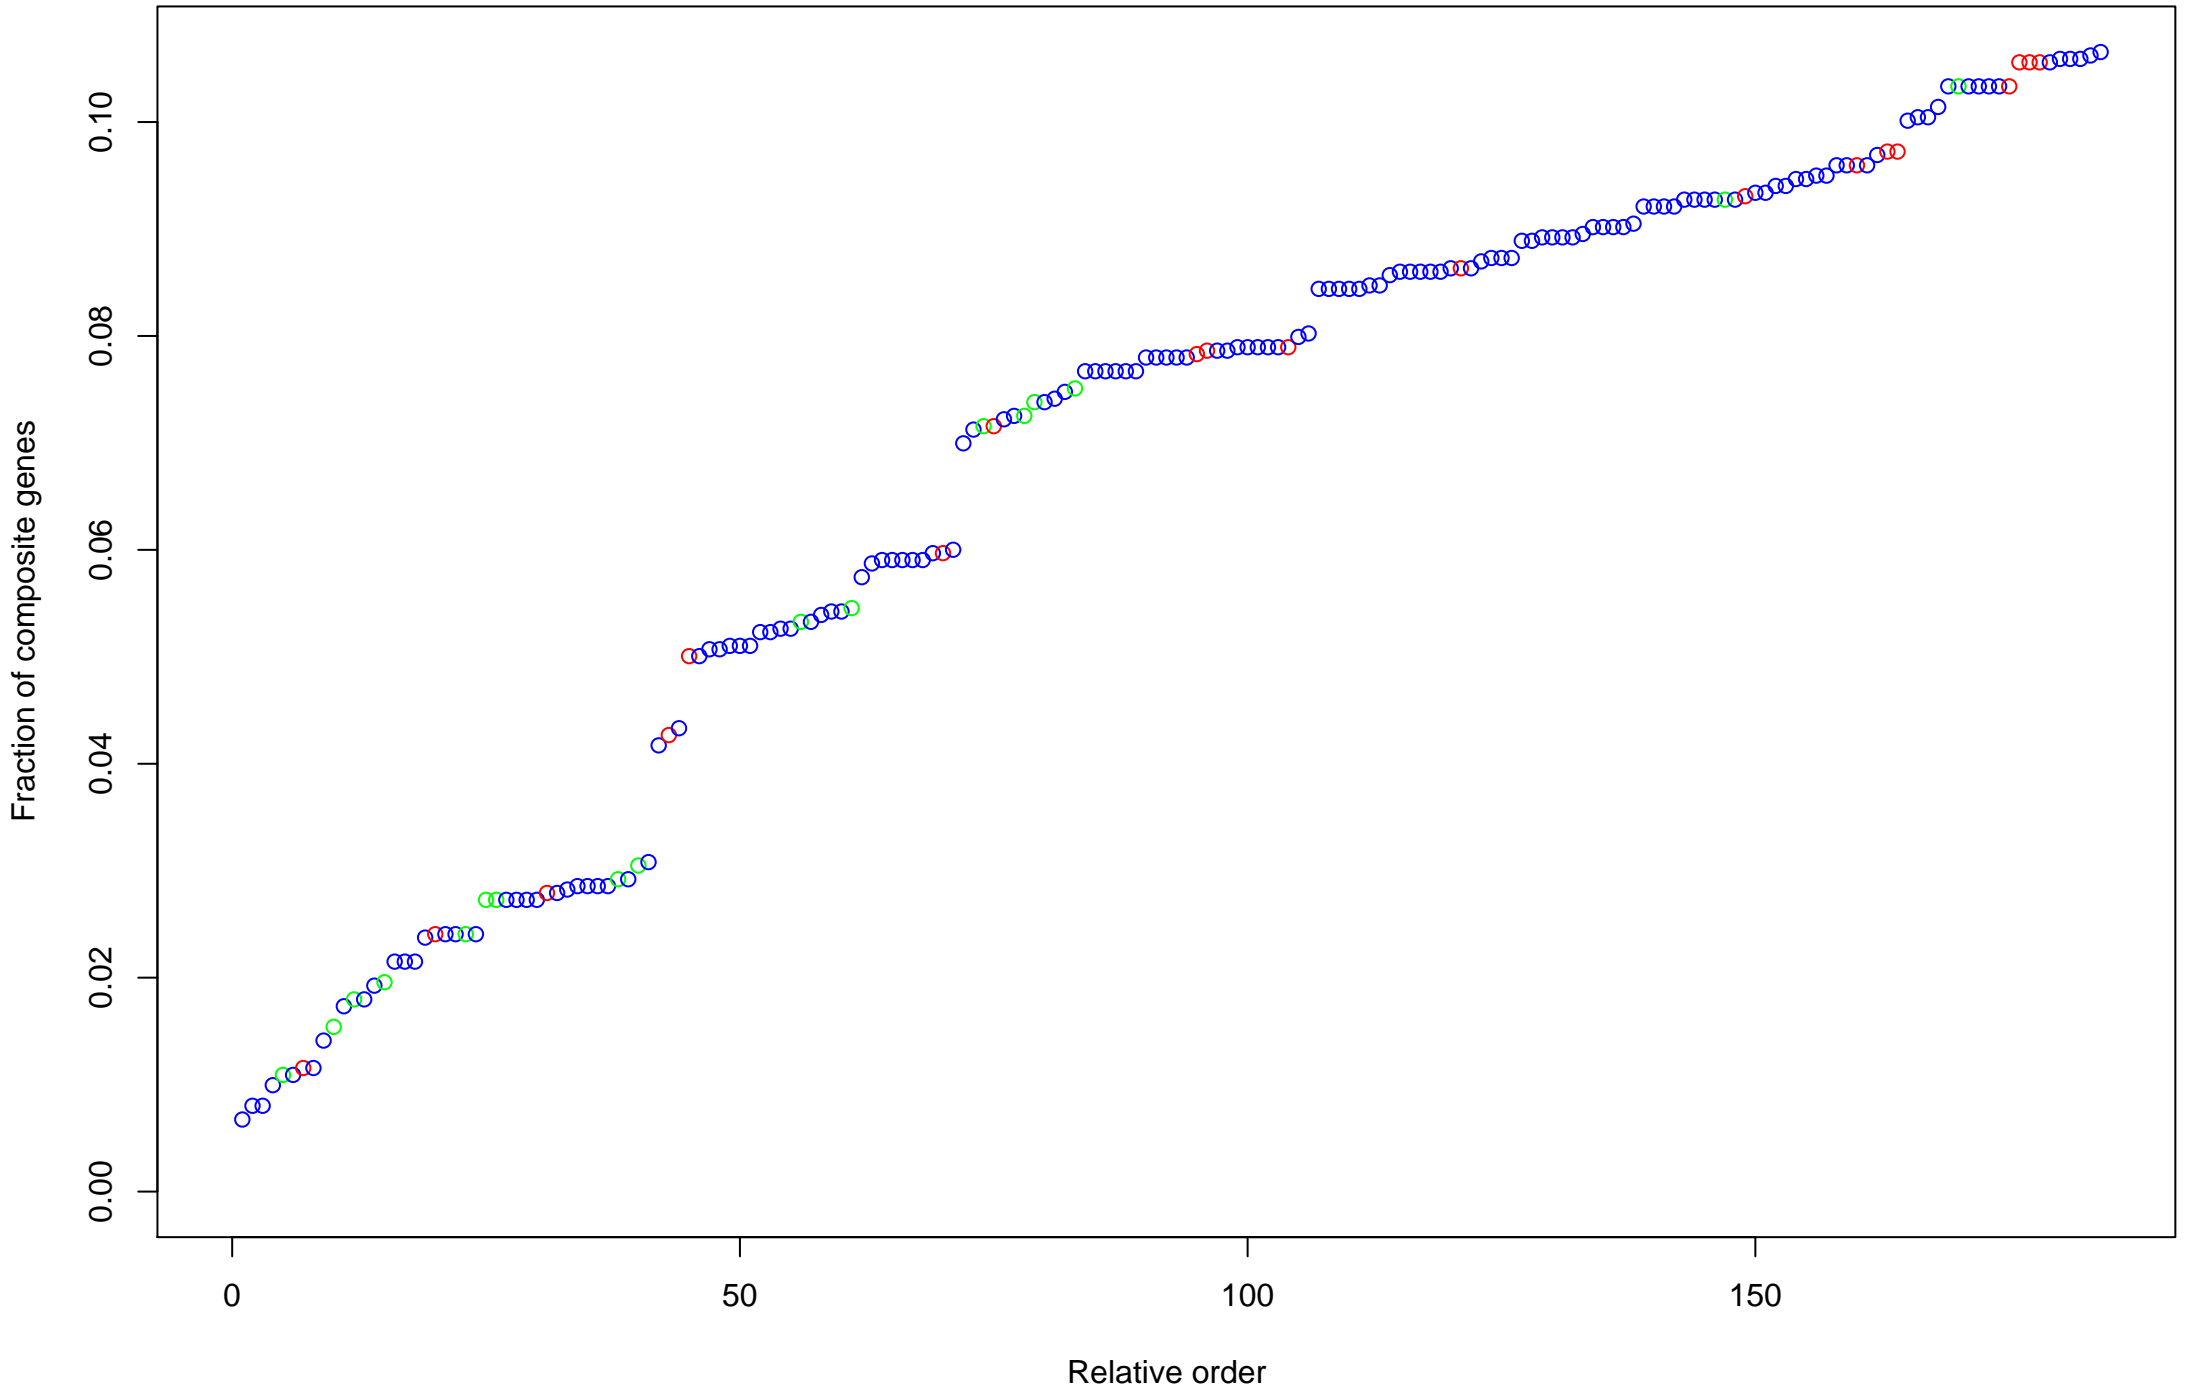



# TVOL-GSS-01 (*Thermoplasma volcanium*)

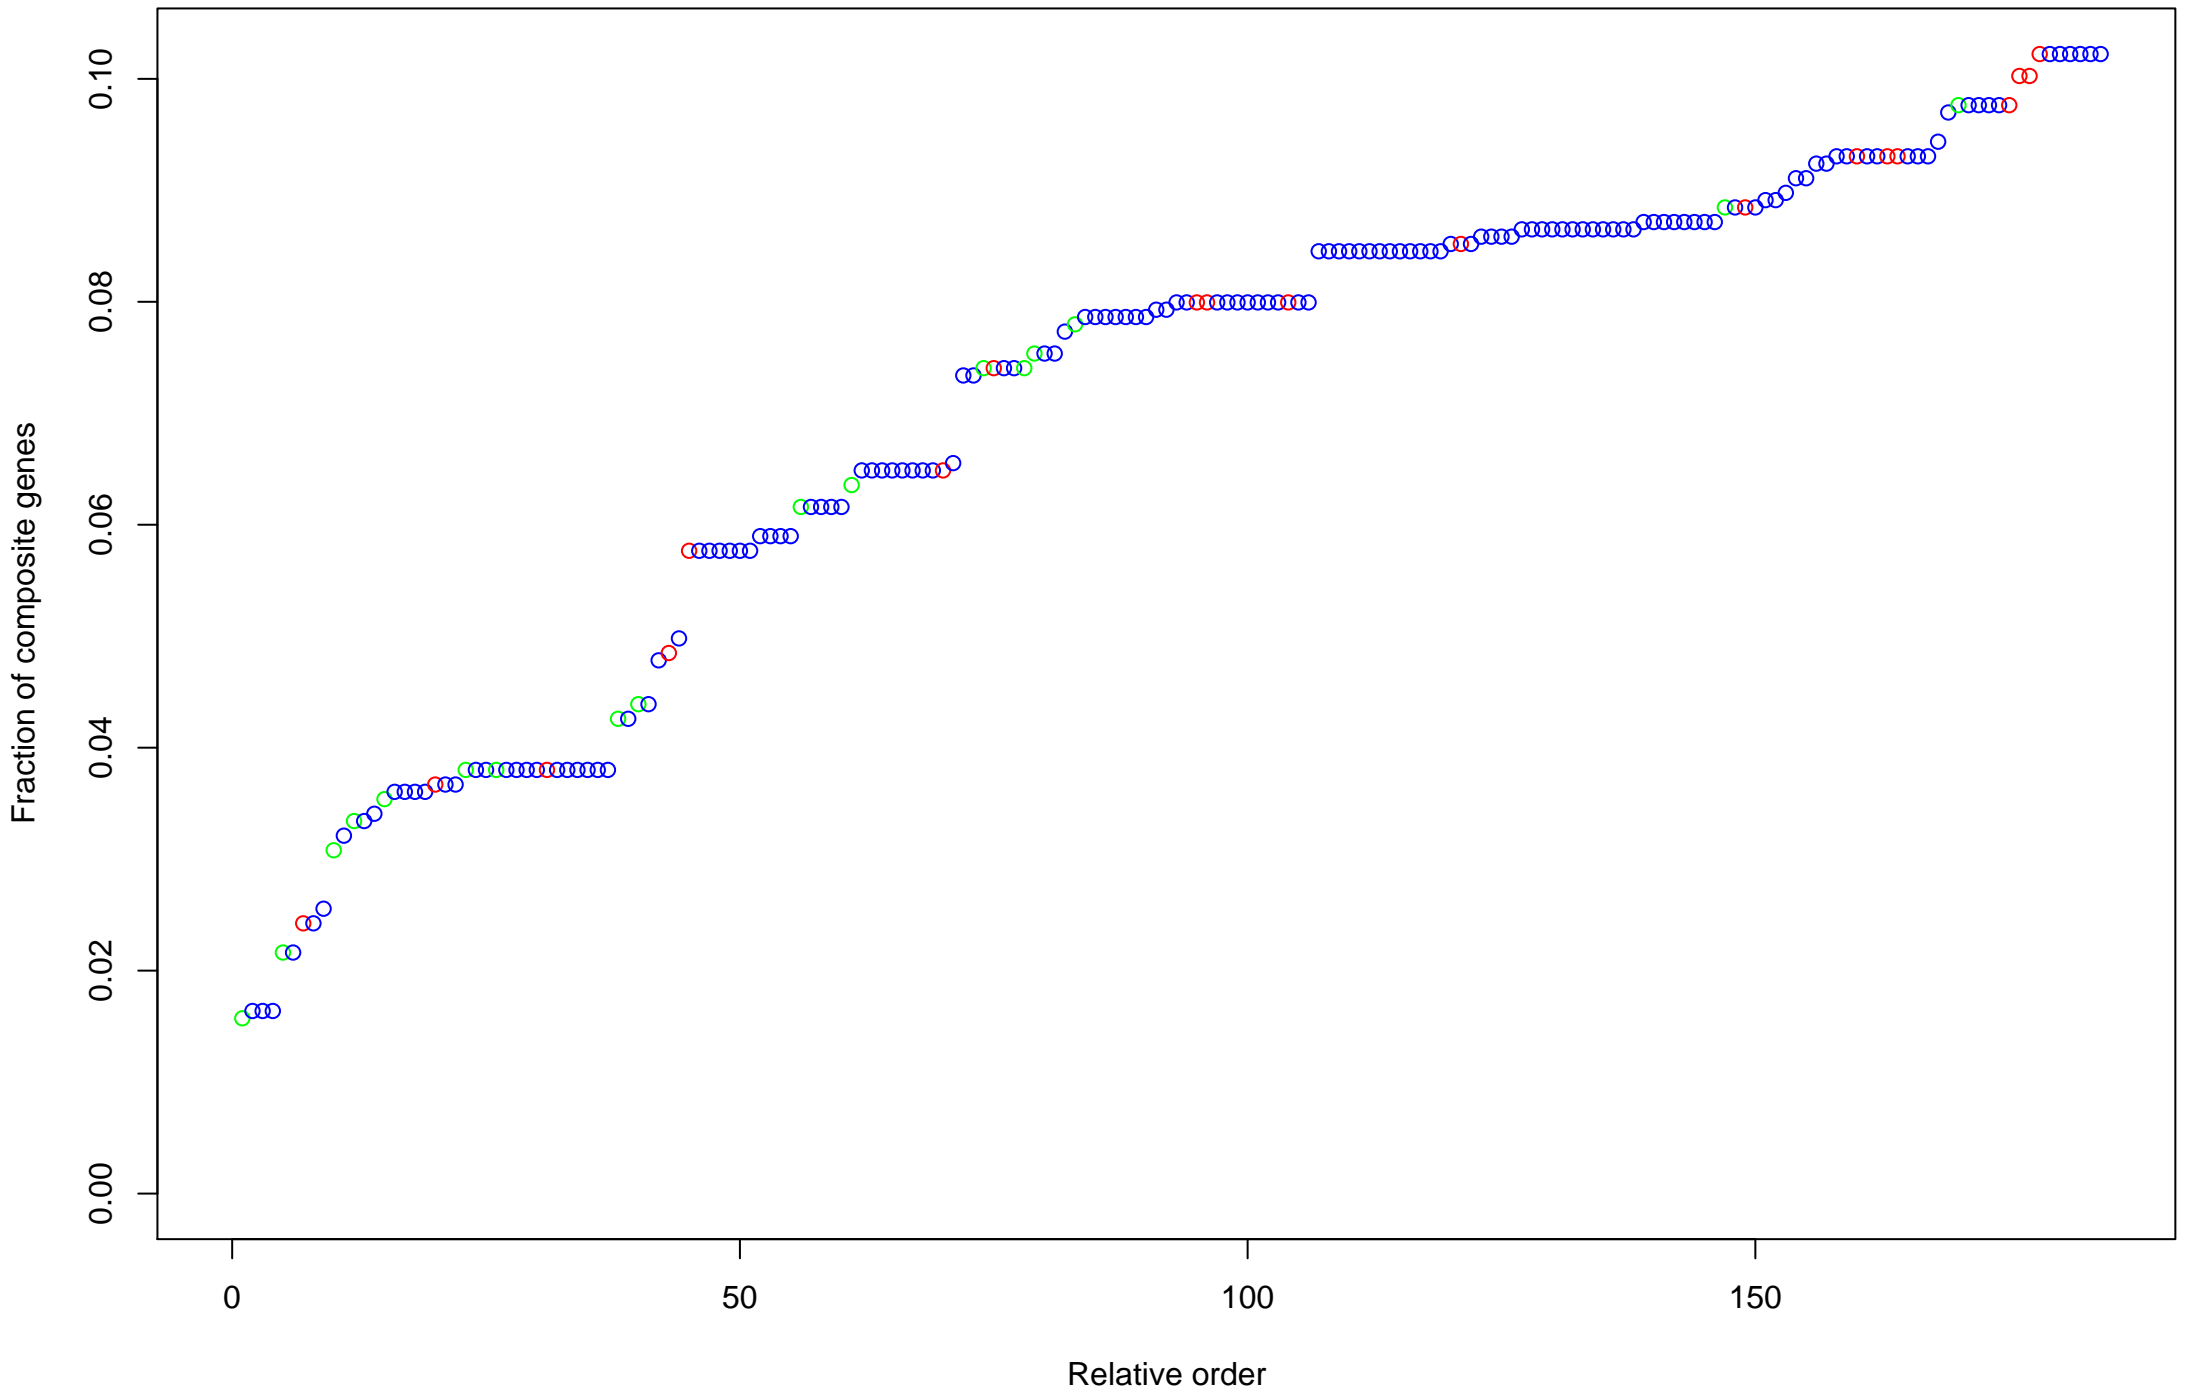

# PABY-GE5-01 (*Pyrococcus abyssi*)

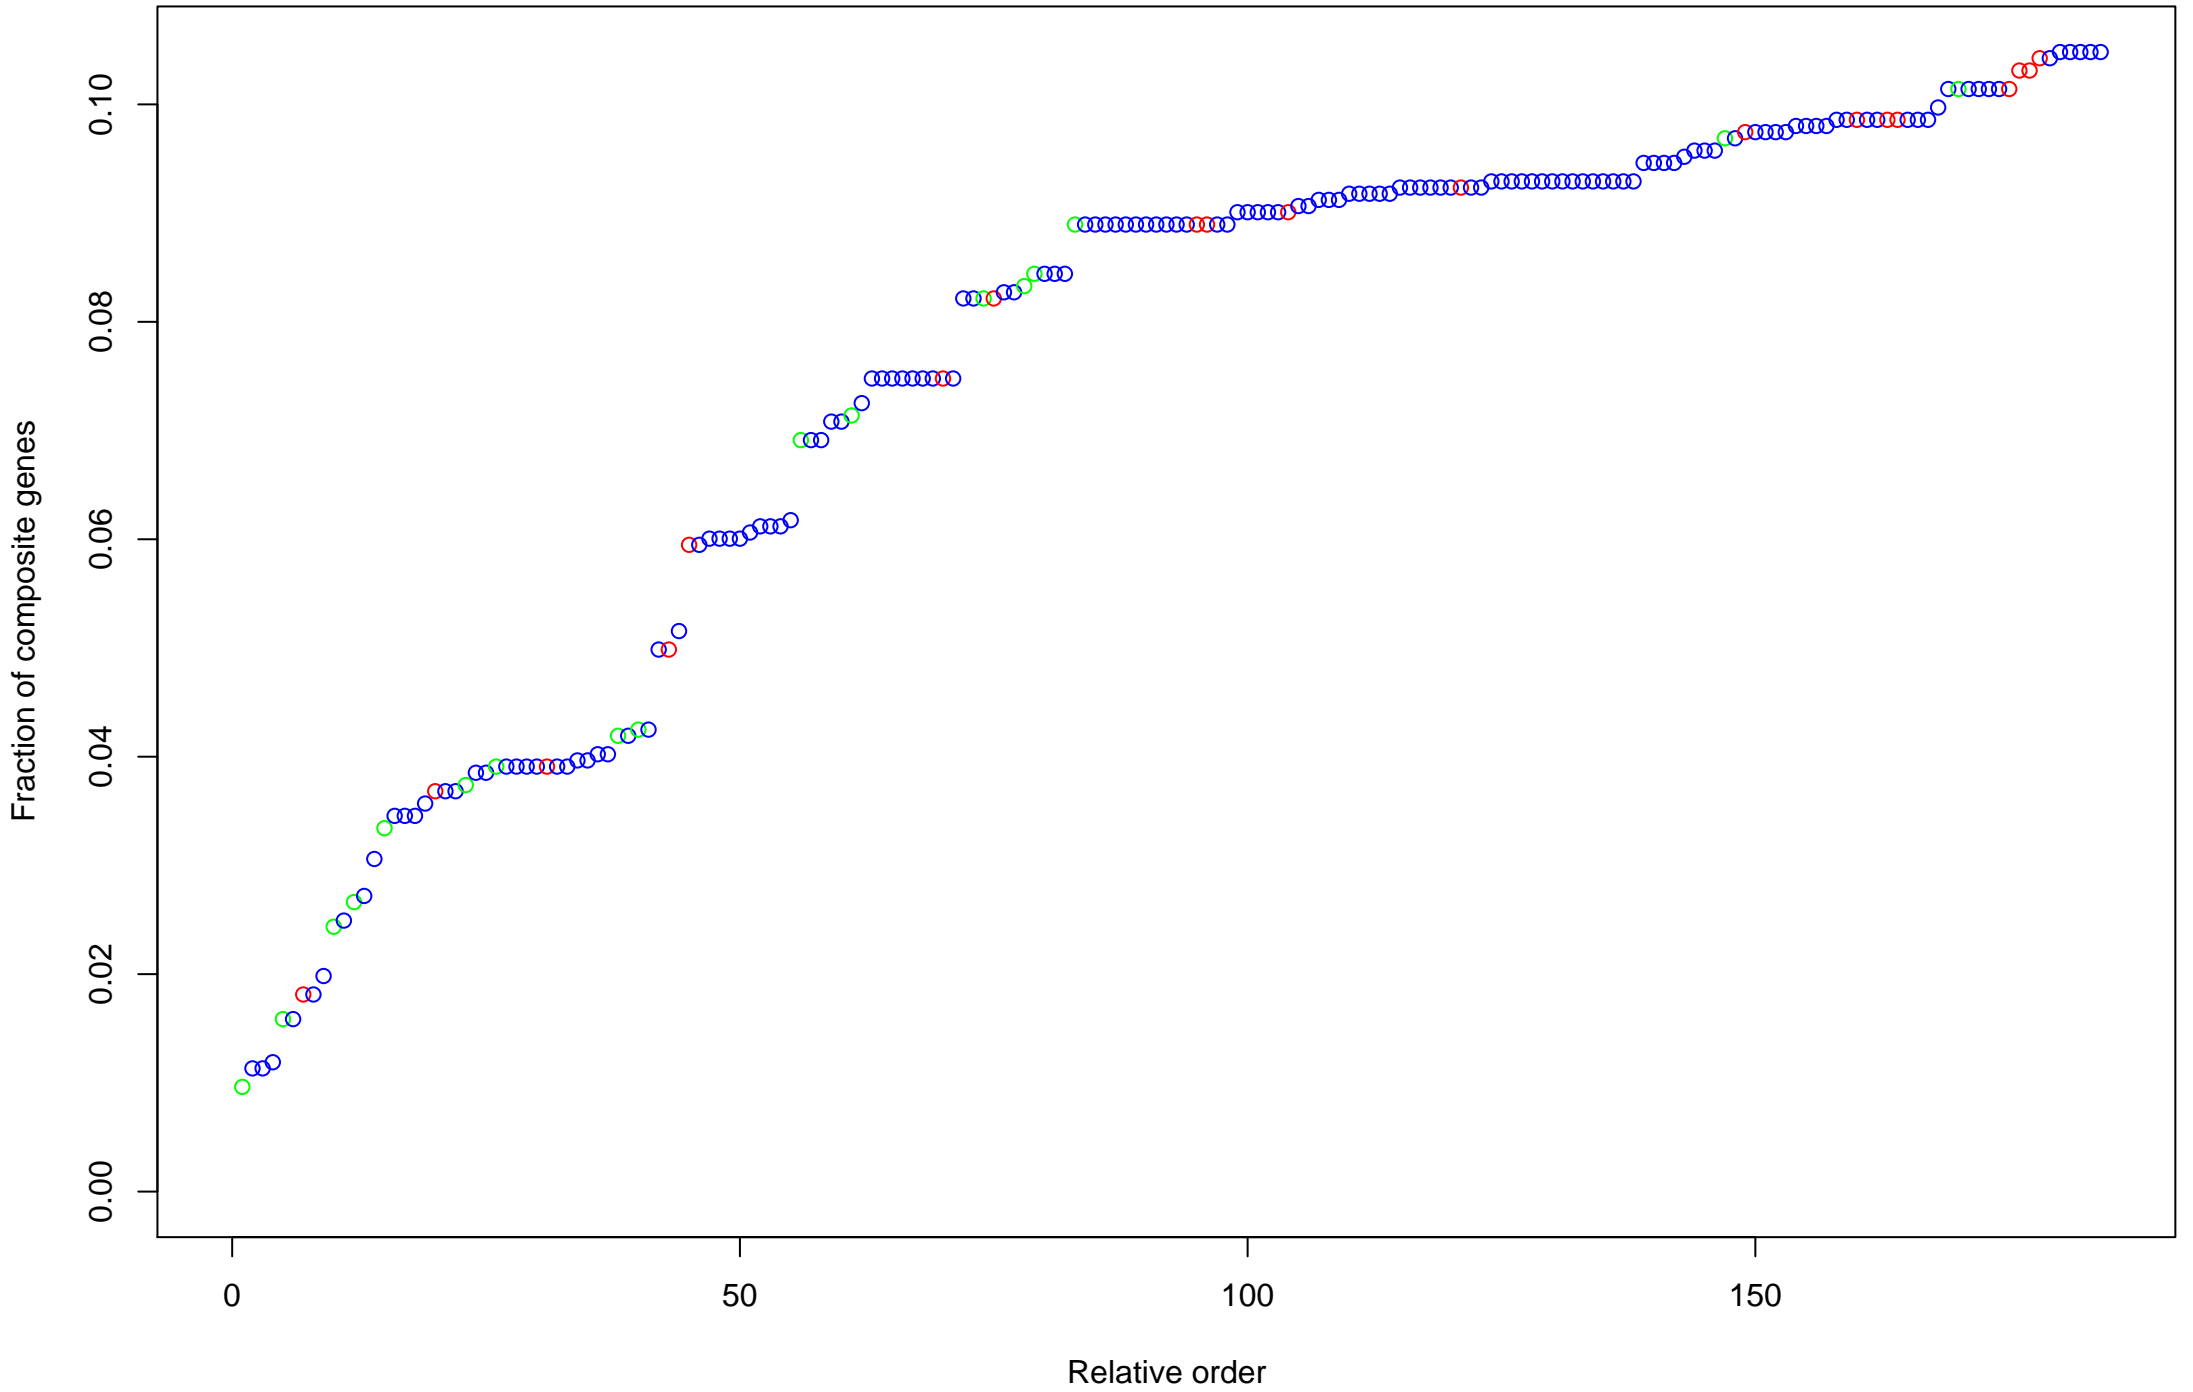

# CJEJ-NCT-01 (*Campylobacter jejuni*)

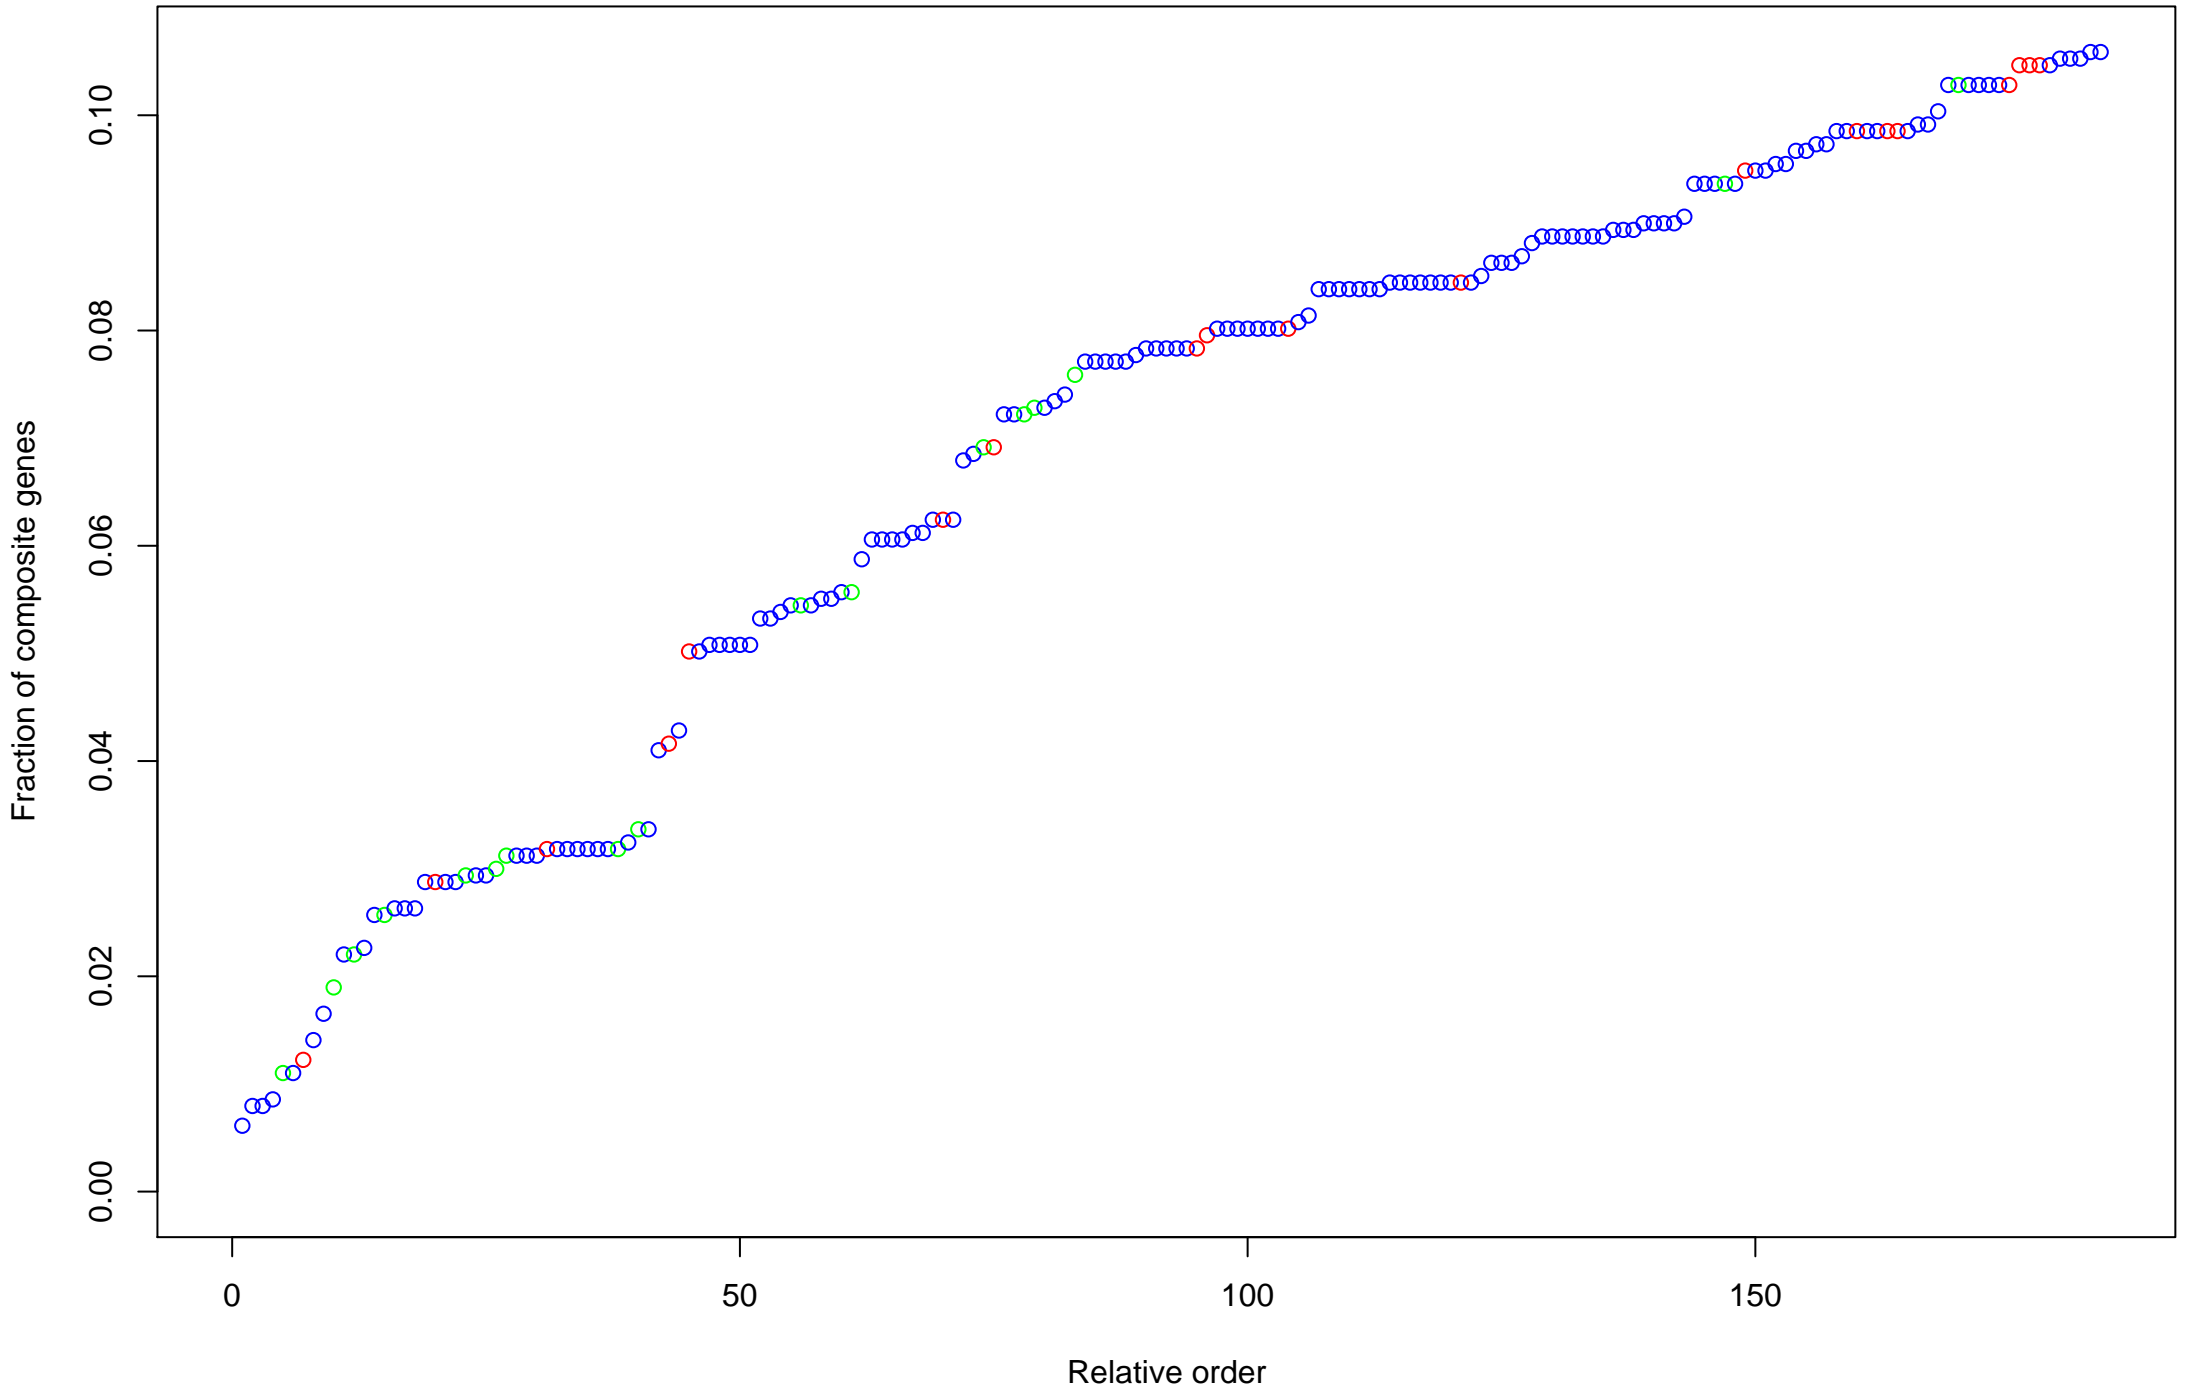

# NMEN-MC5-01 (*Neisseria meningitidis*)

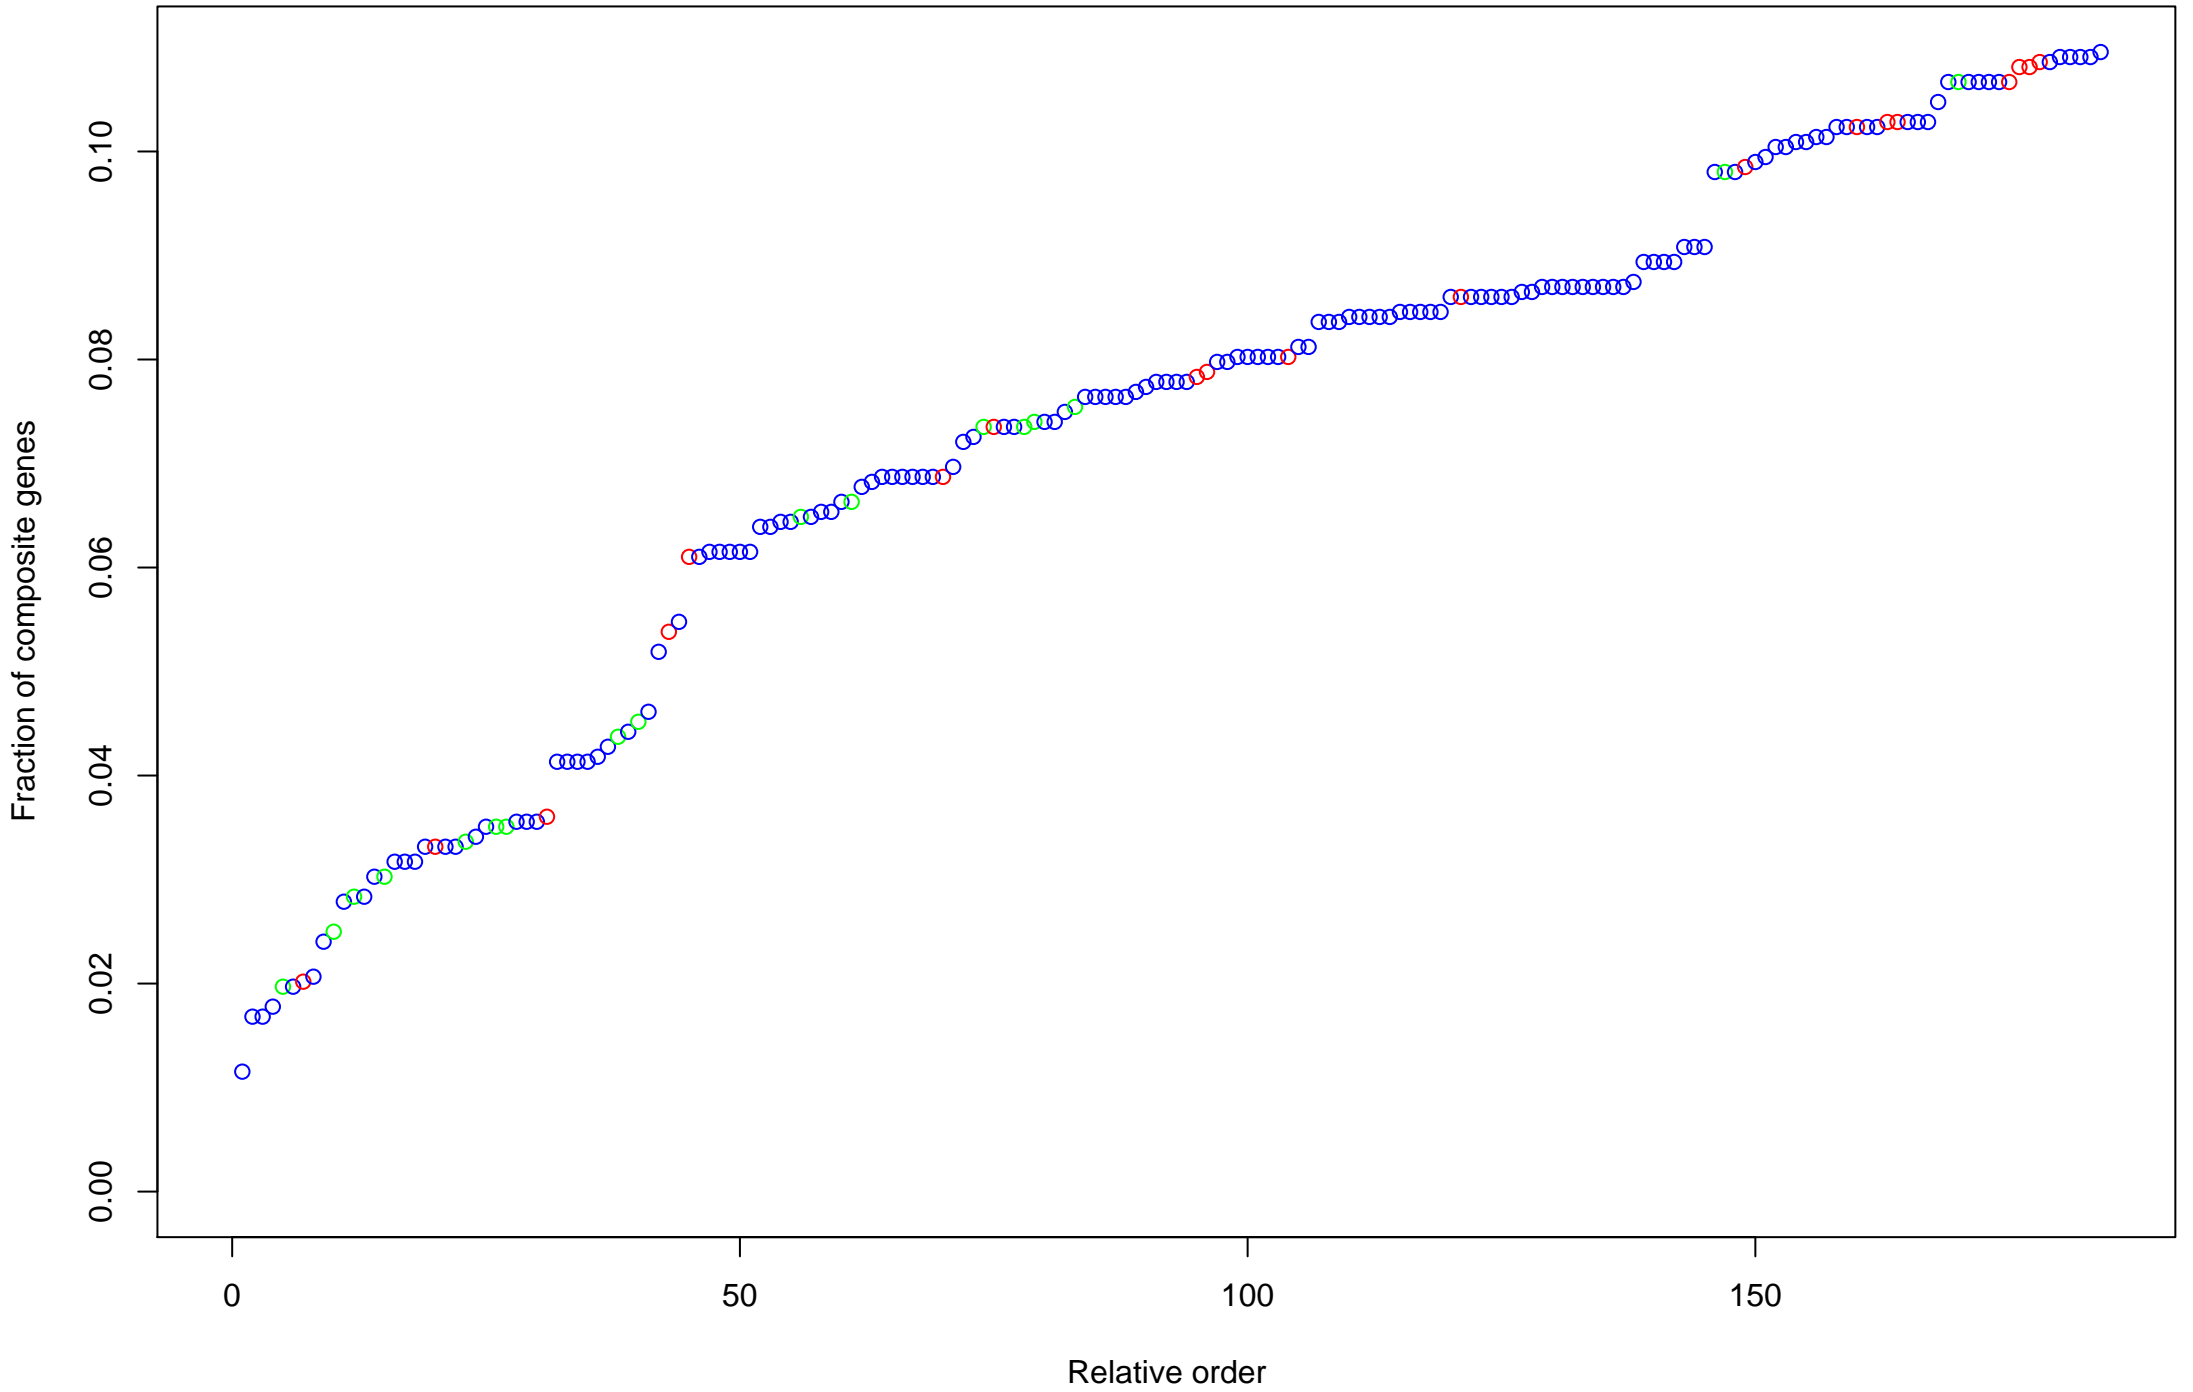

# CPNE-AR3-01 (*Chlamydia pneumoniae*)

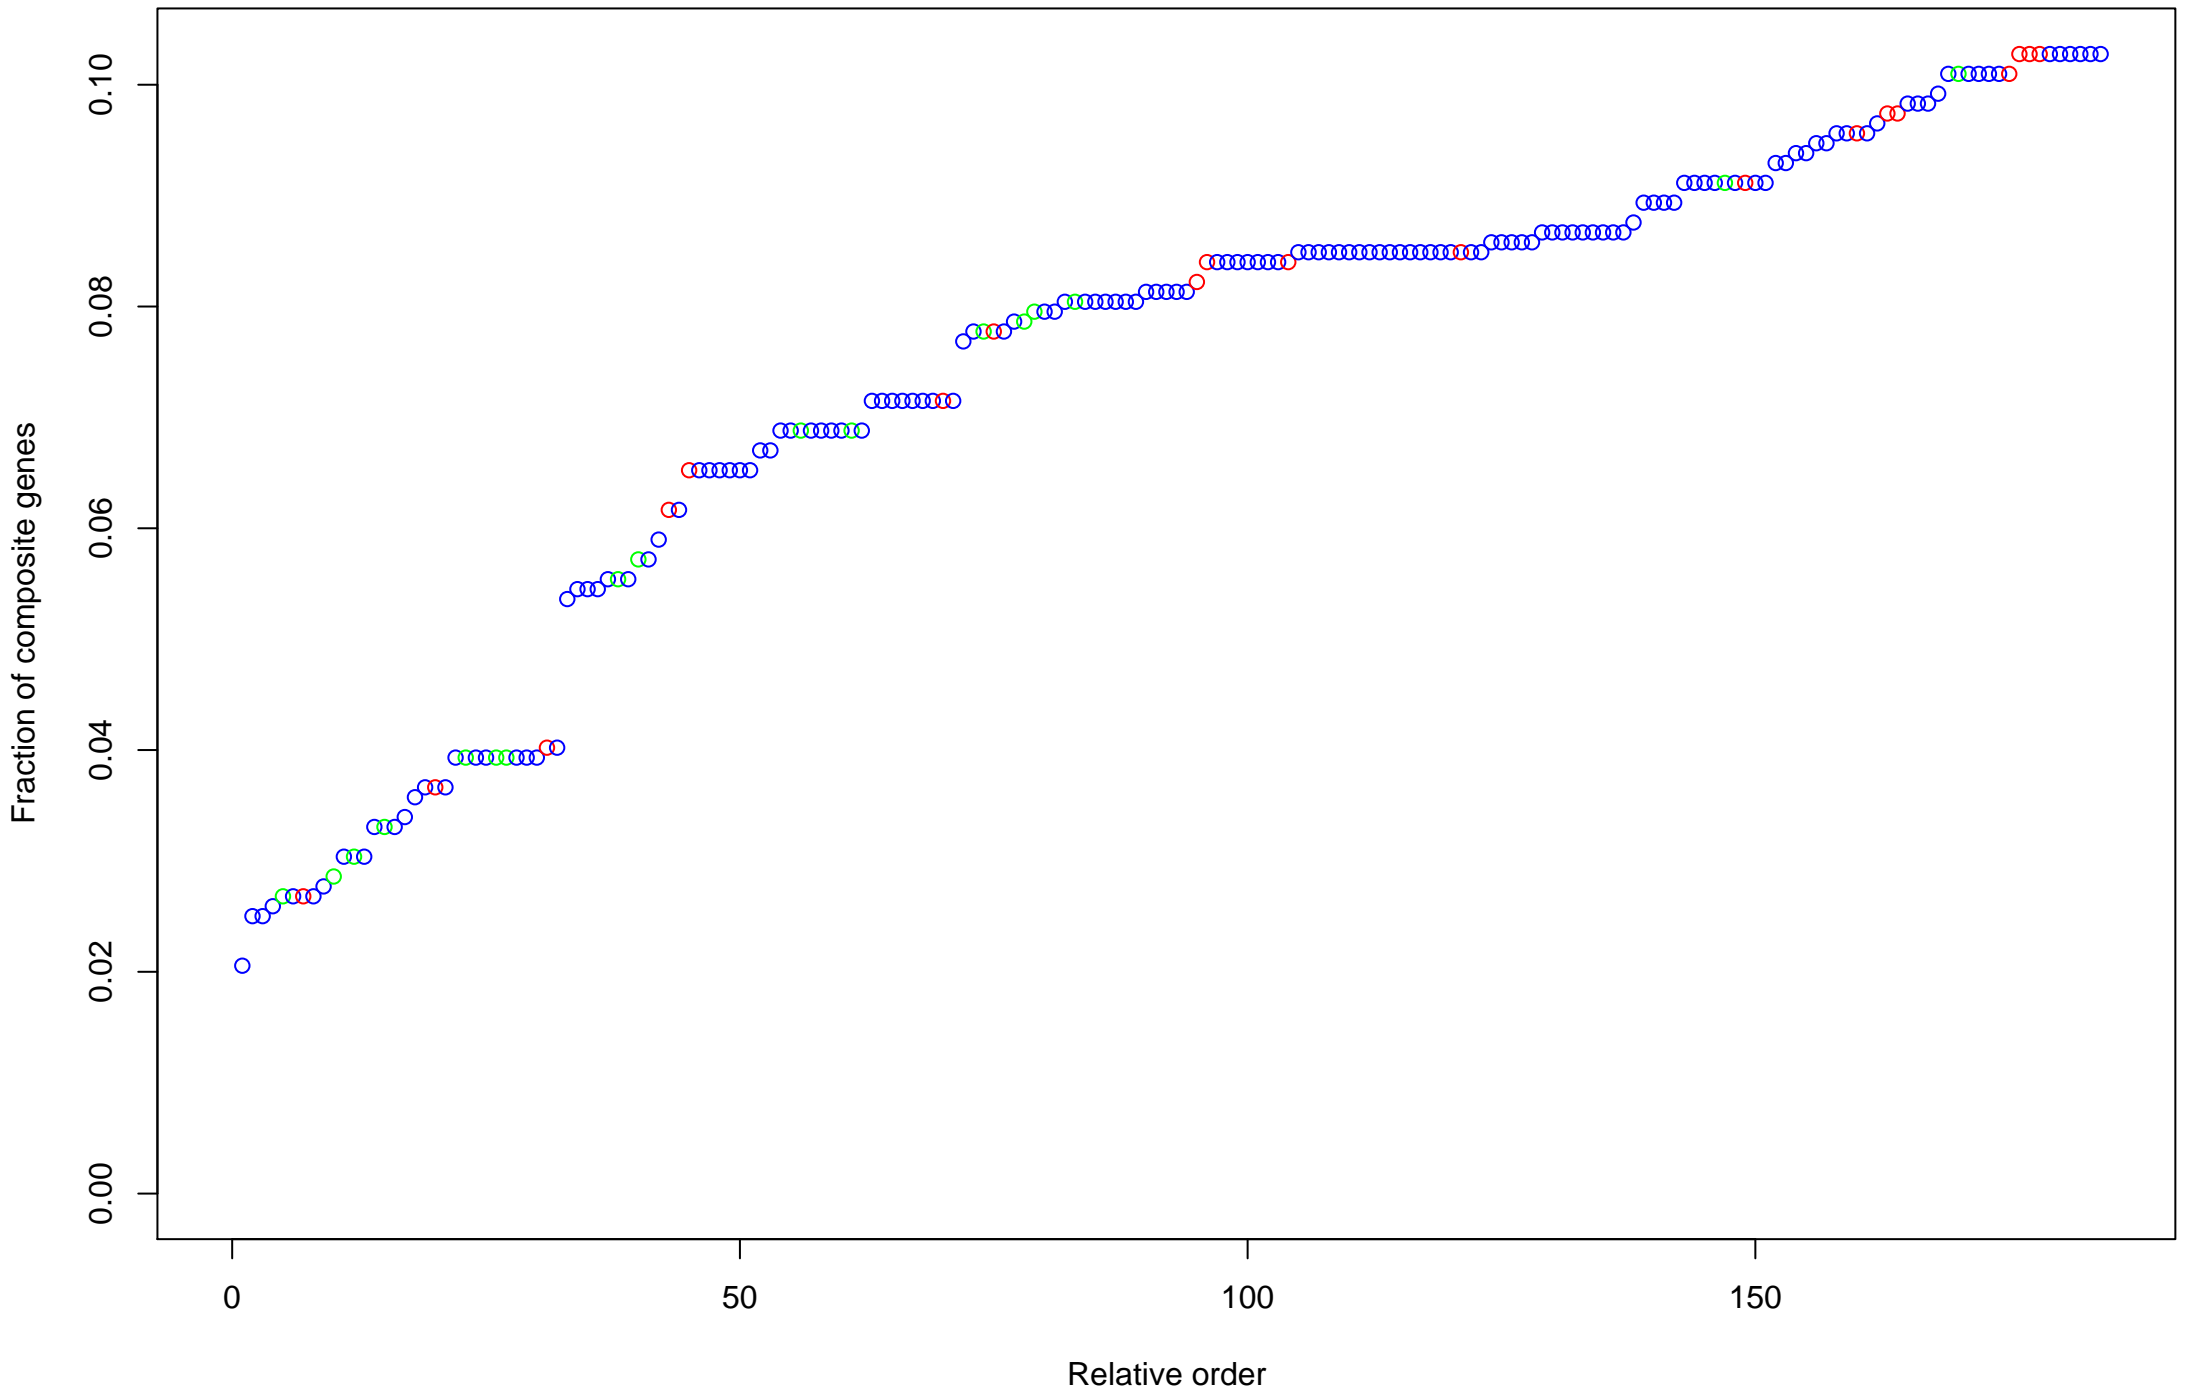

# CTRA-MOP-01 (*Chlamydia trachomatis*)

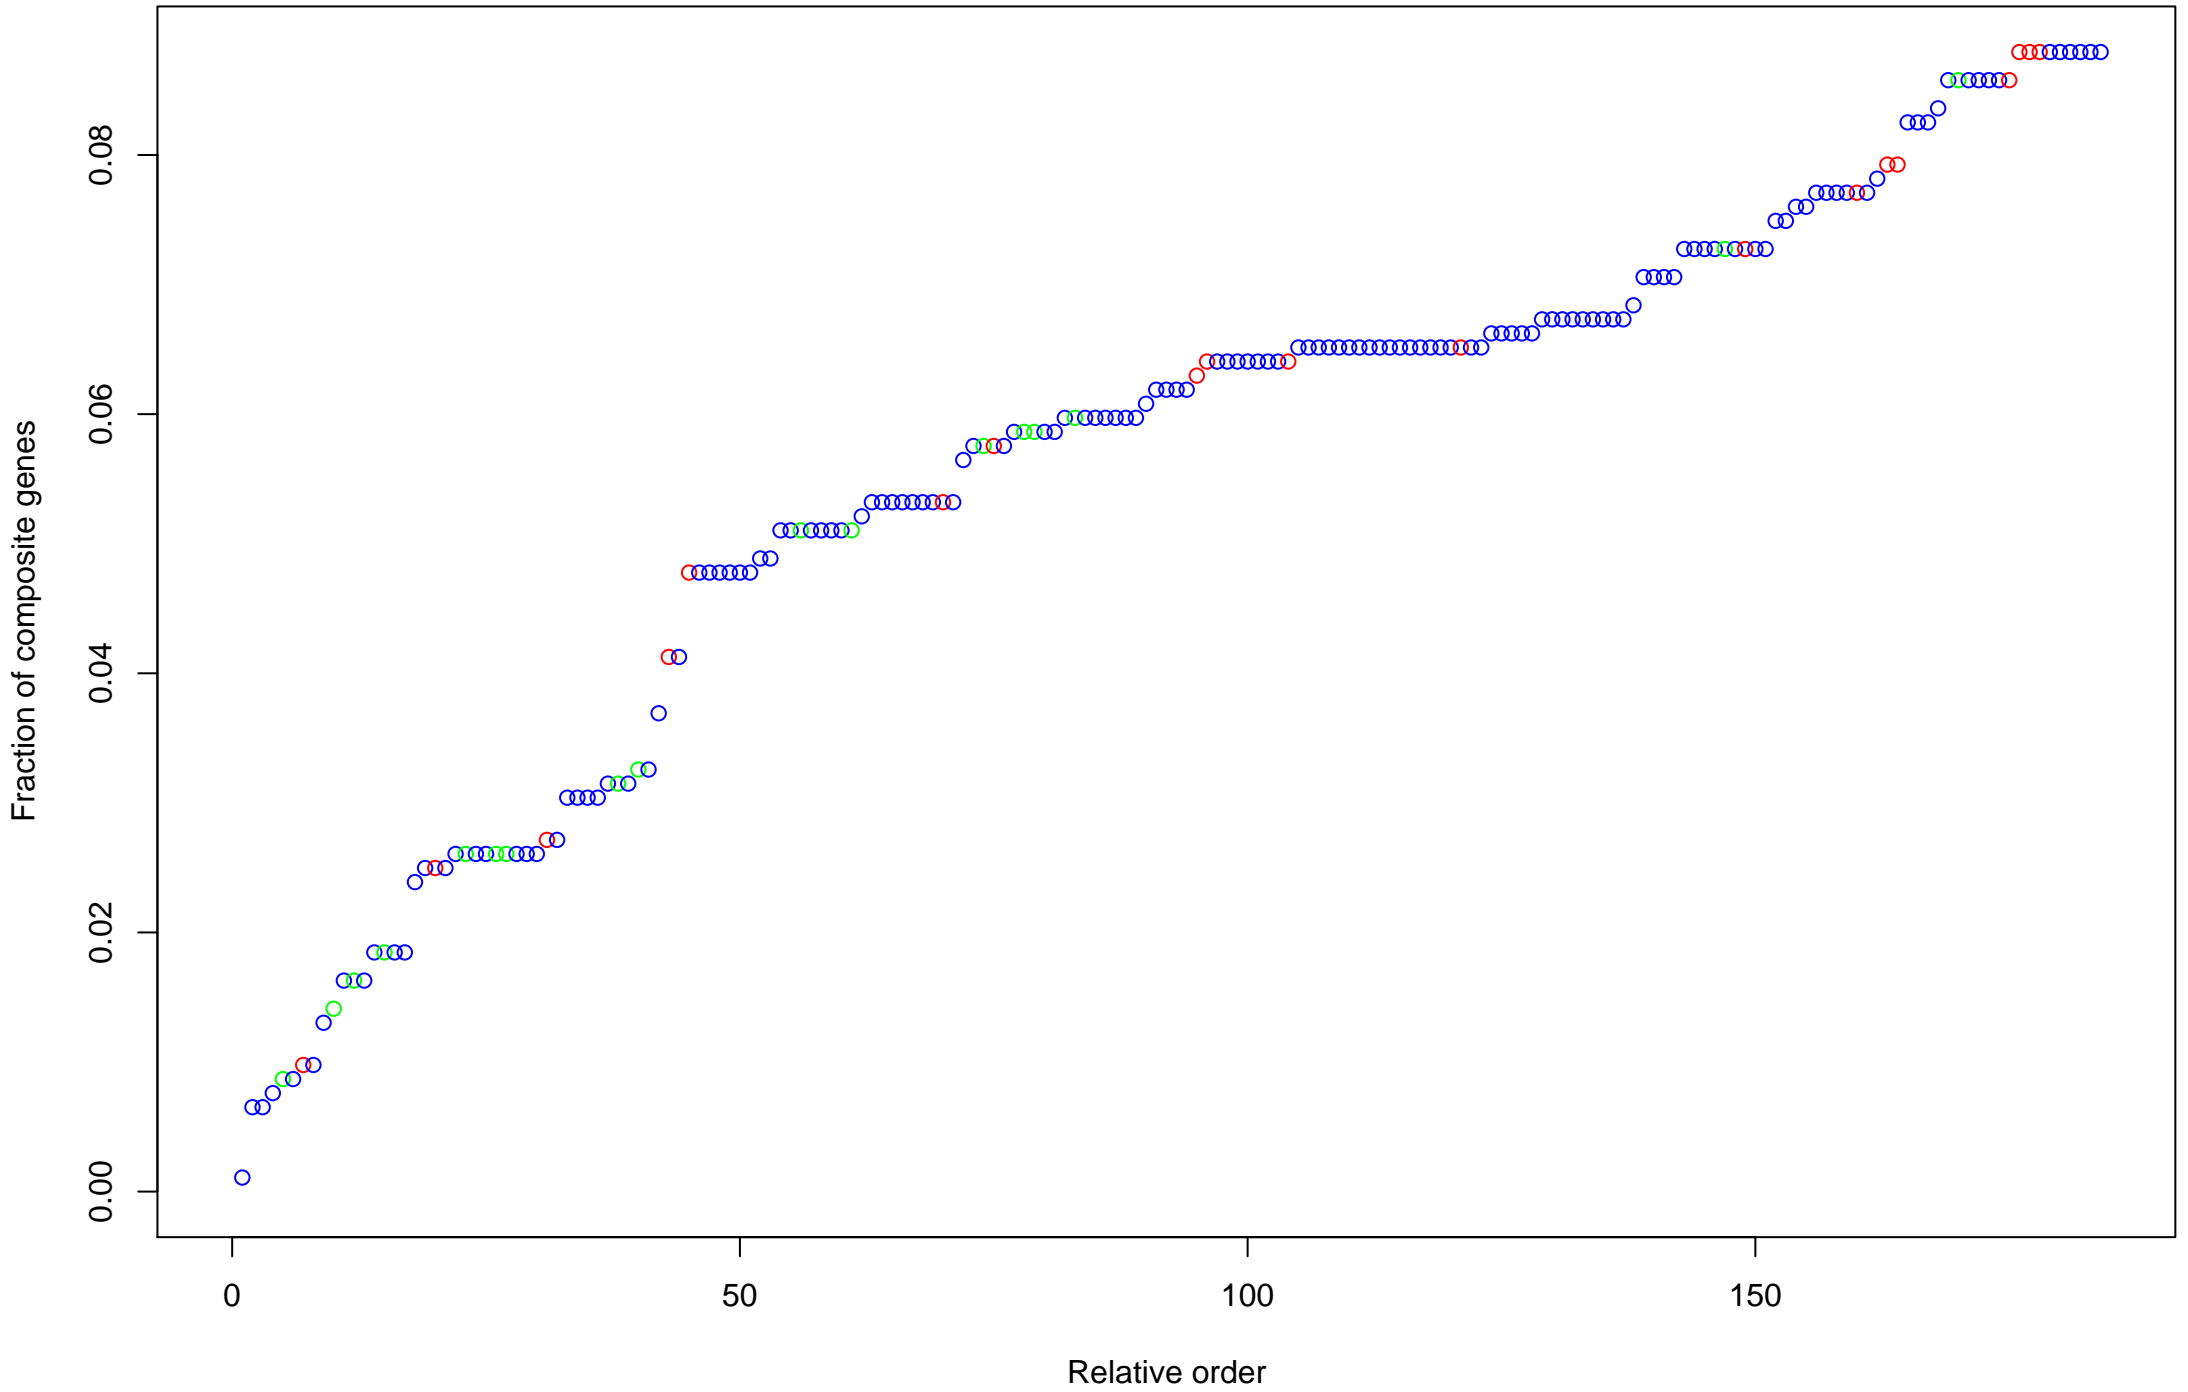

# DMEL-XXX-02 (*Drosophila melanogaster*)

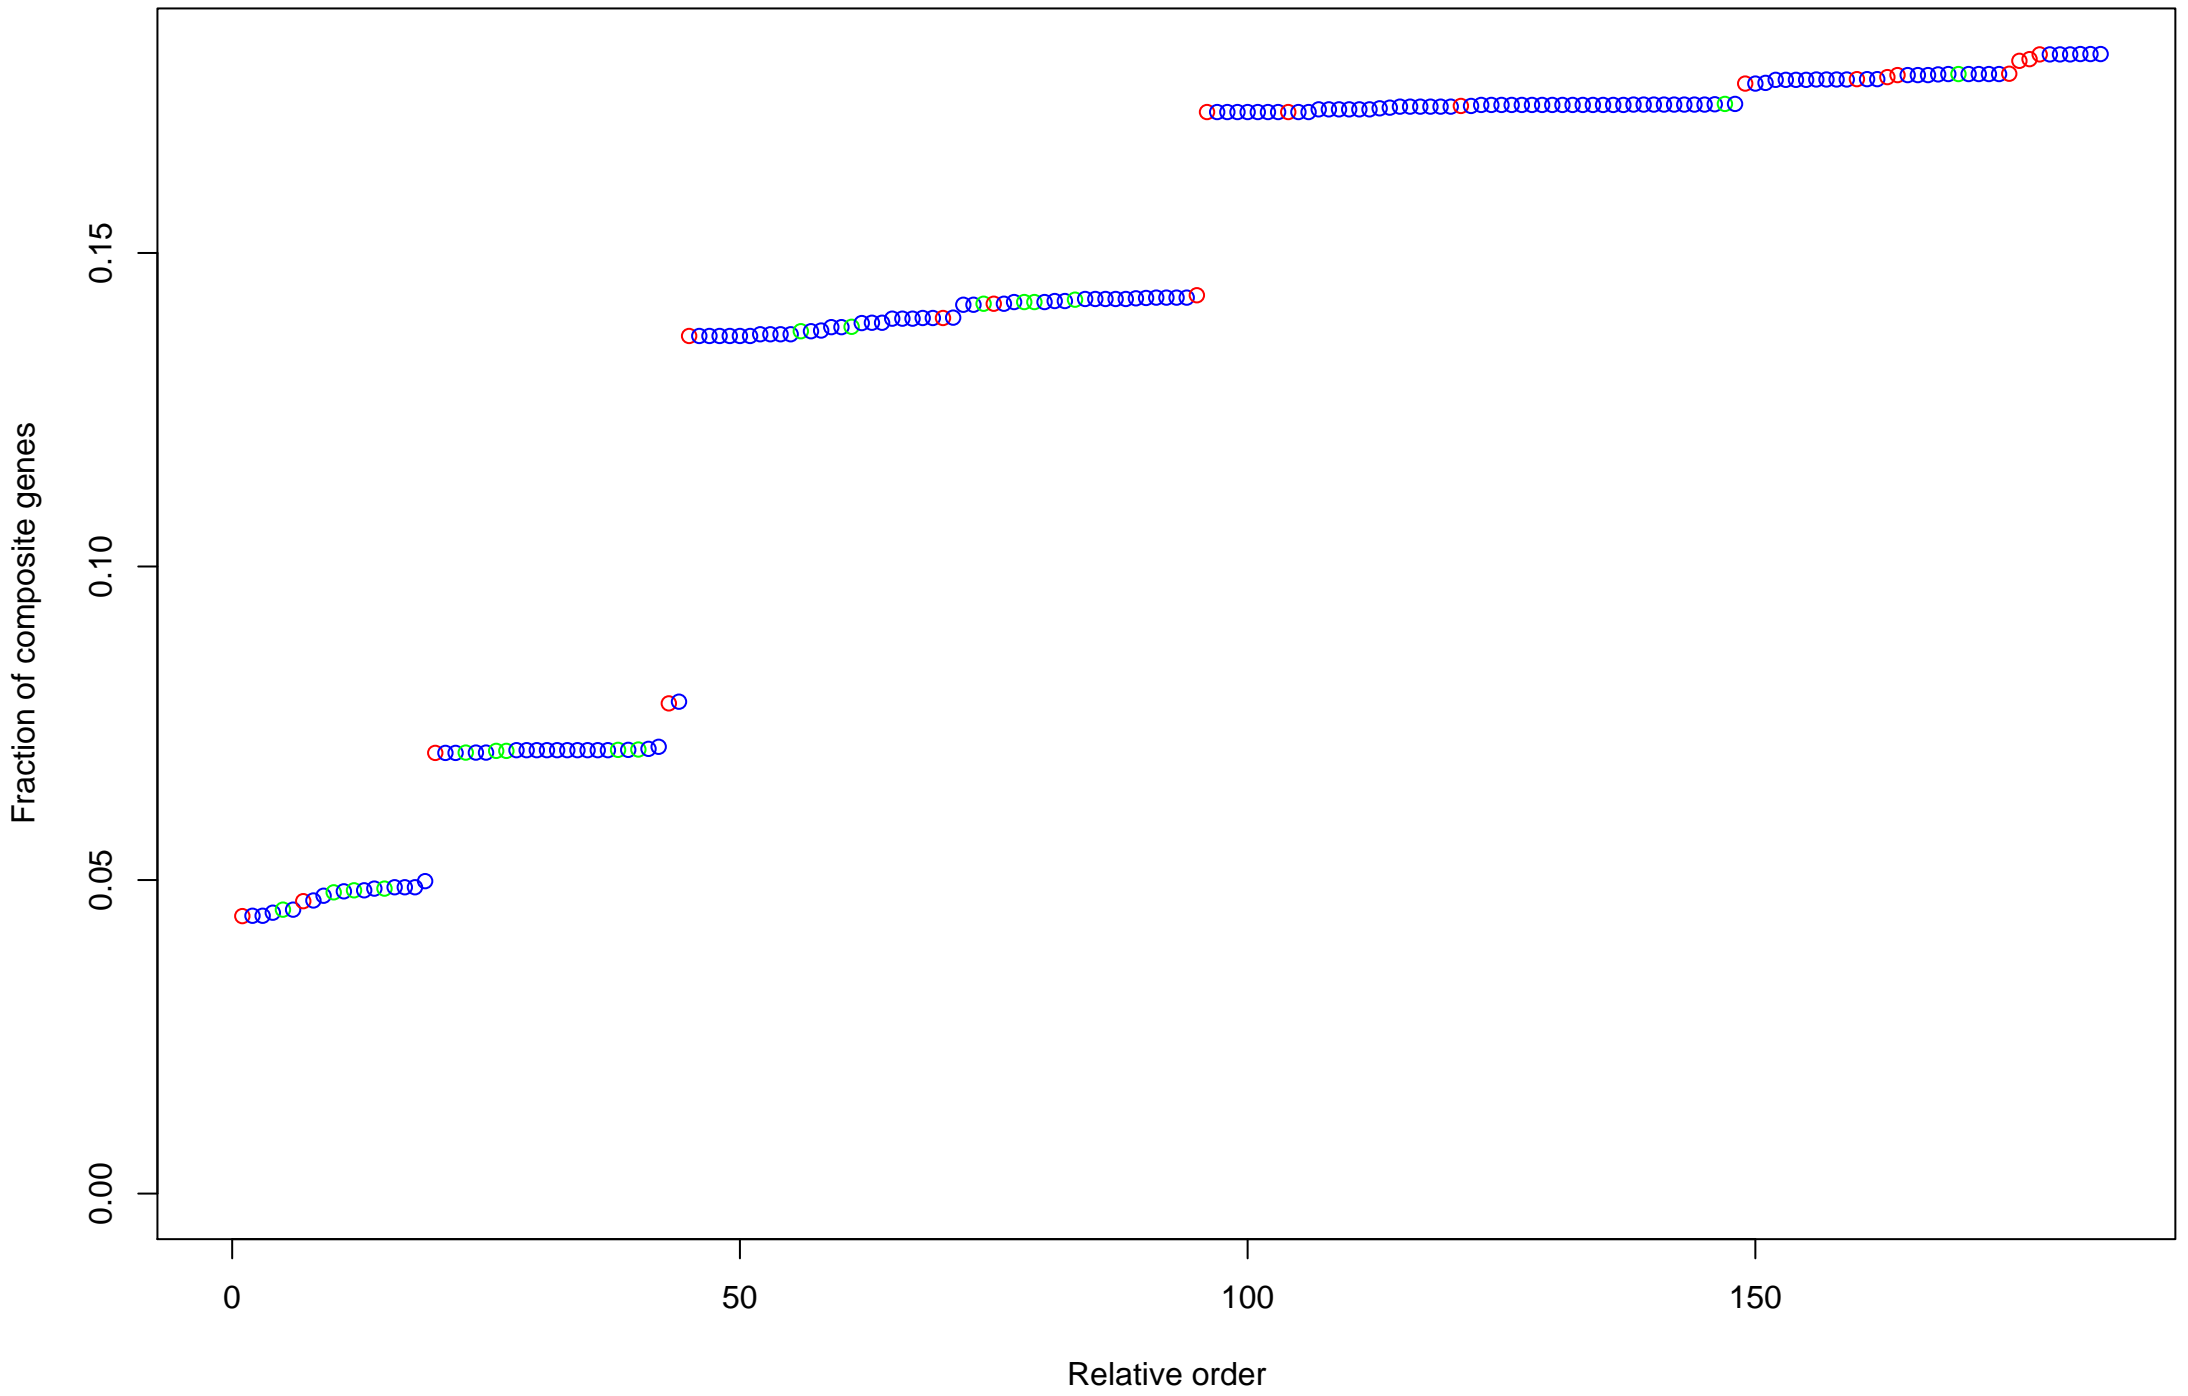

# NMEN-Z24-01 (*Neisseria meningitidis*)

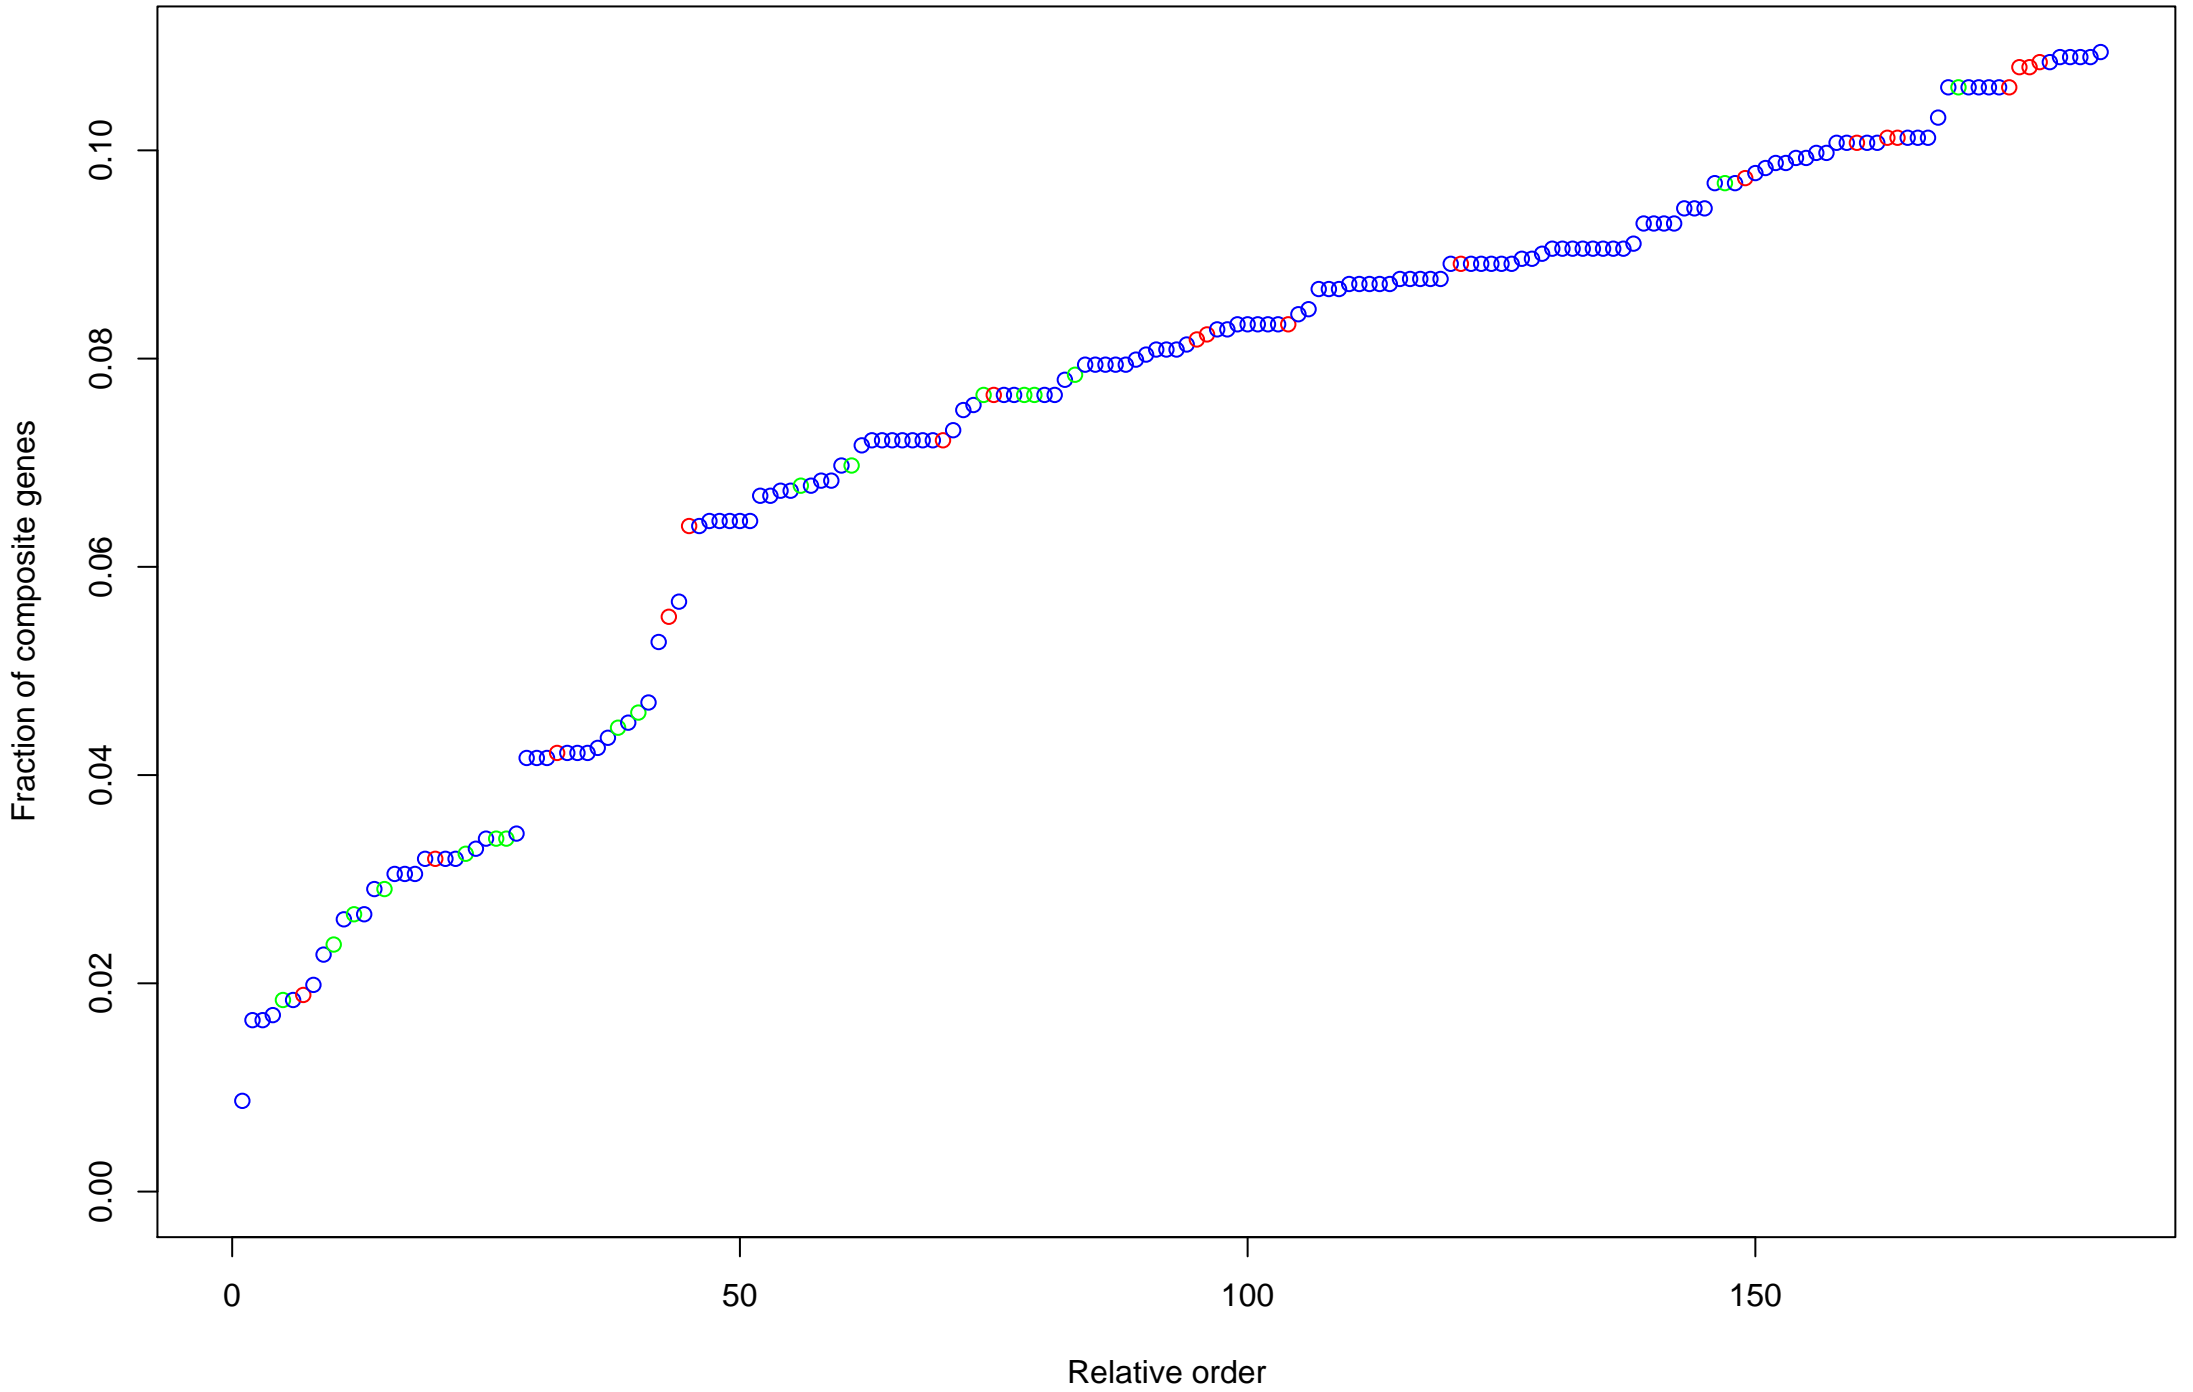



# CPNE-J13-01 (*Chlamydia pneumoniae*)

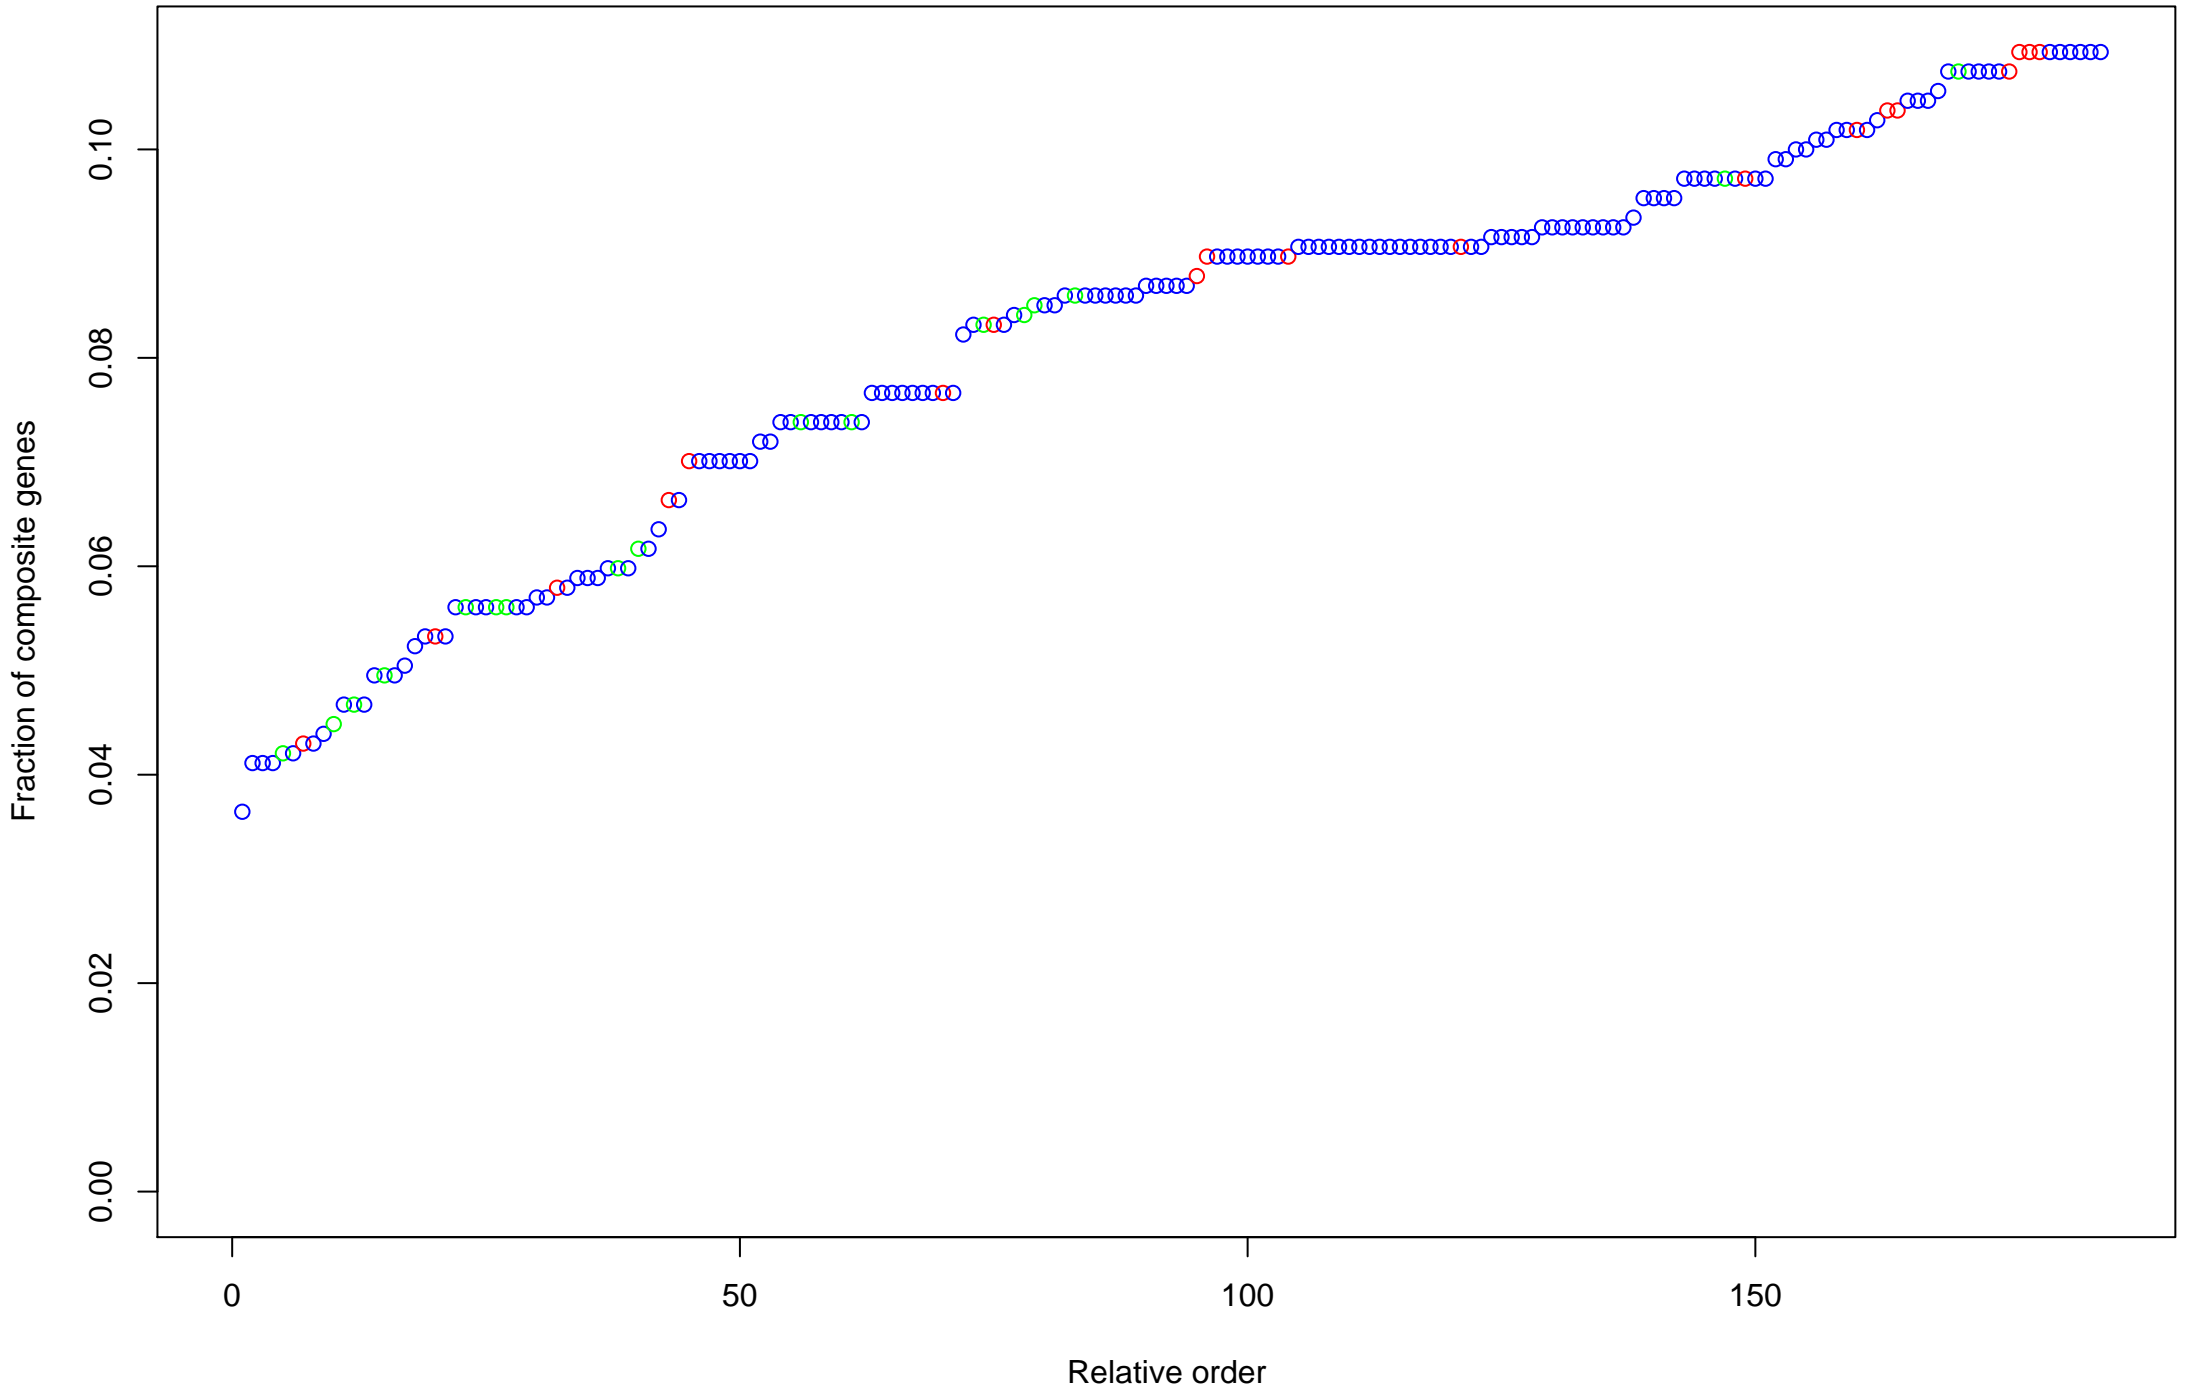

# XFAS-9A5-01 (*Xylella fastidiosa*)

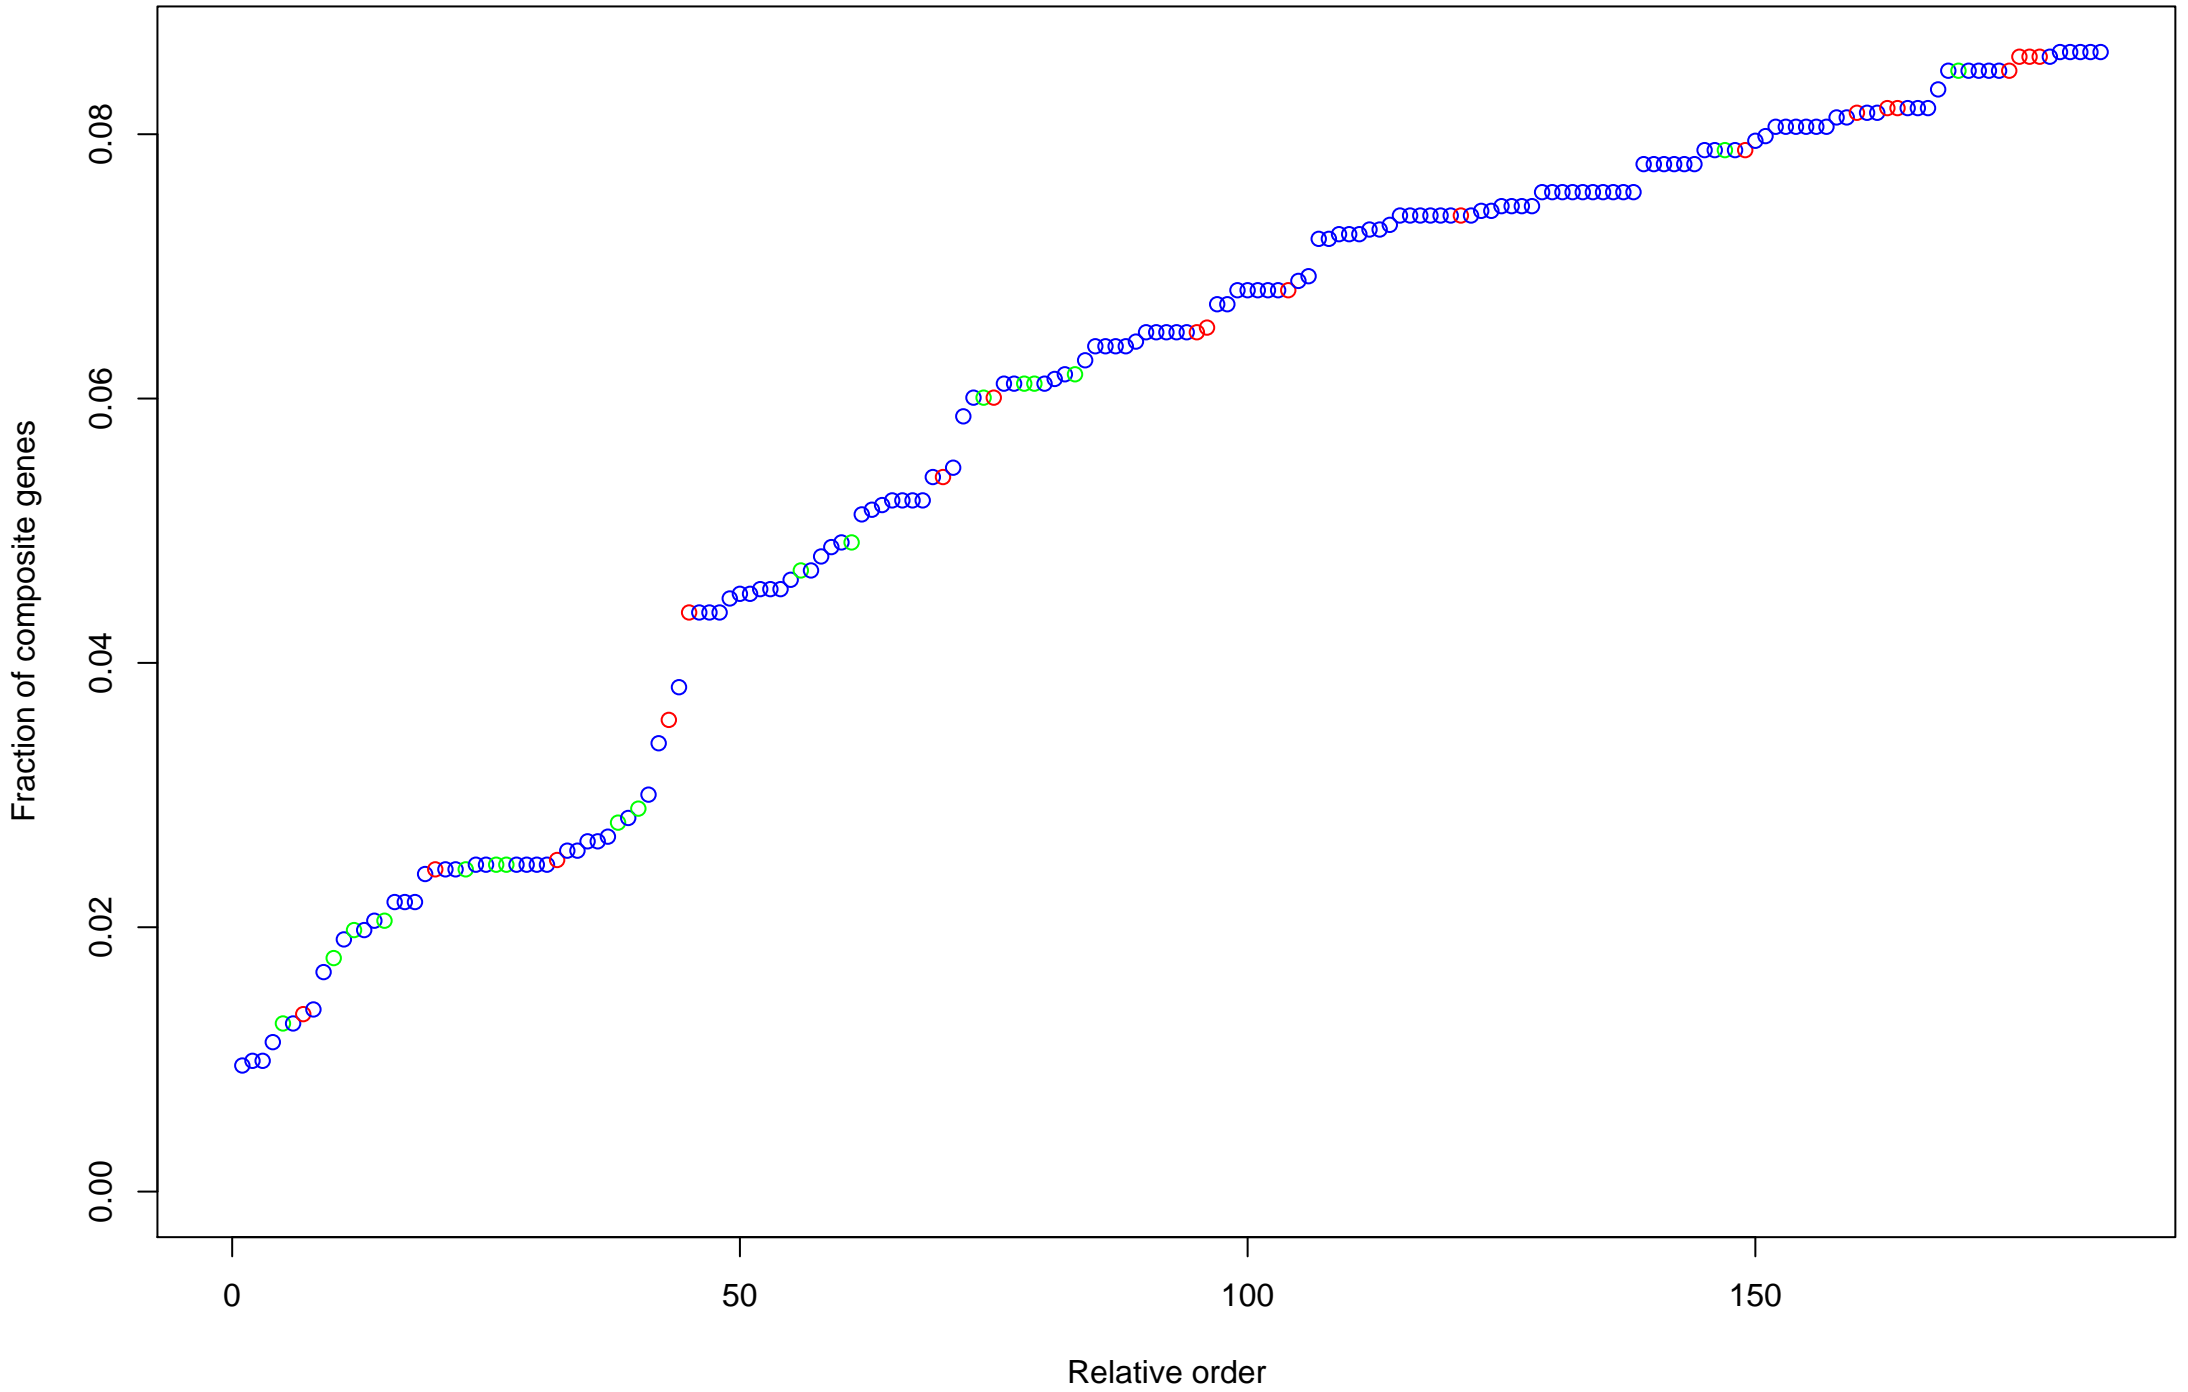

# VCHO-N16-01 (*Vibrio cholerae*)

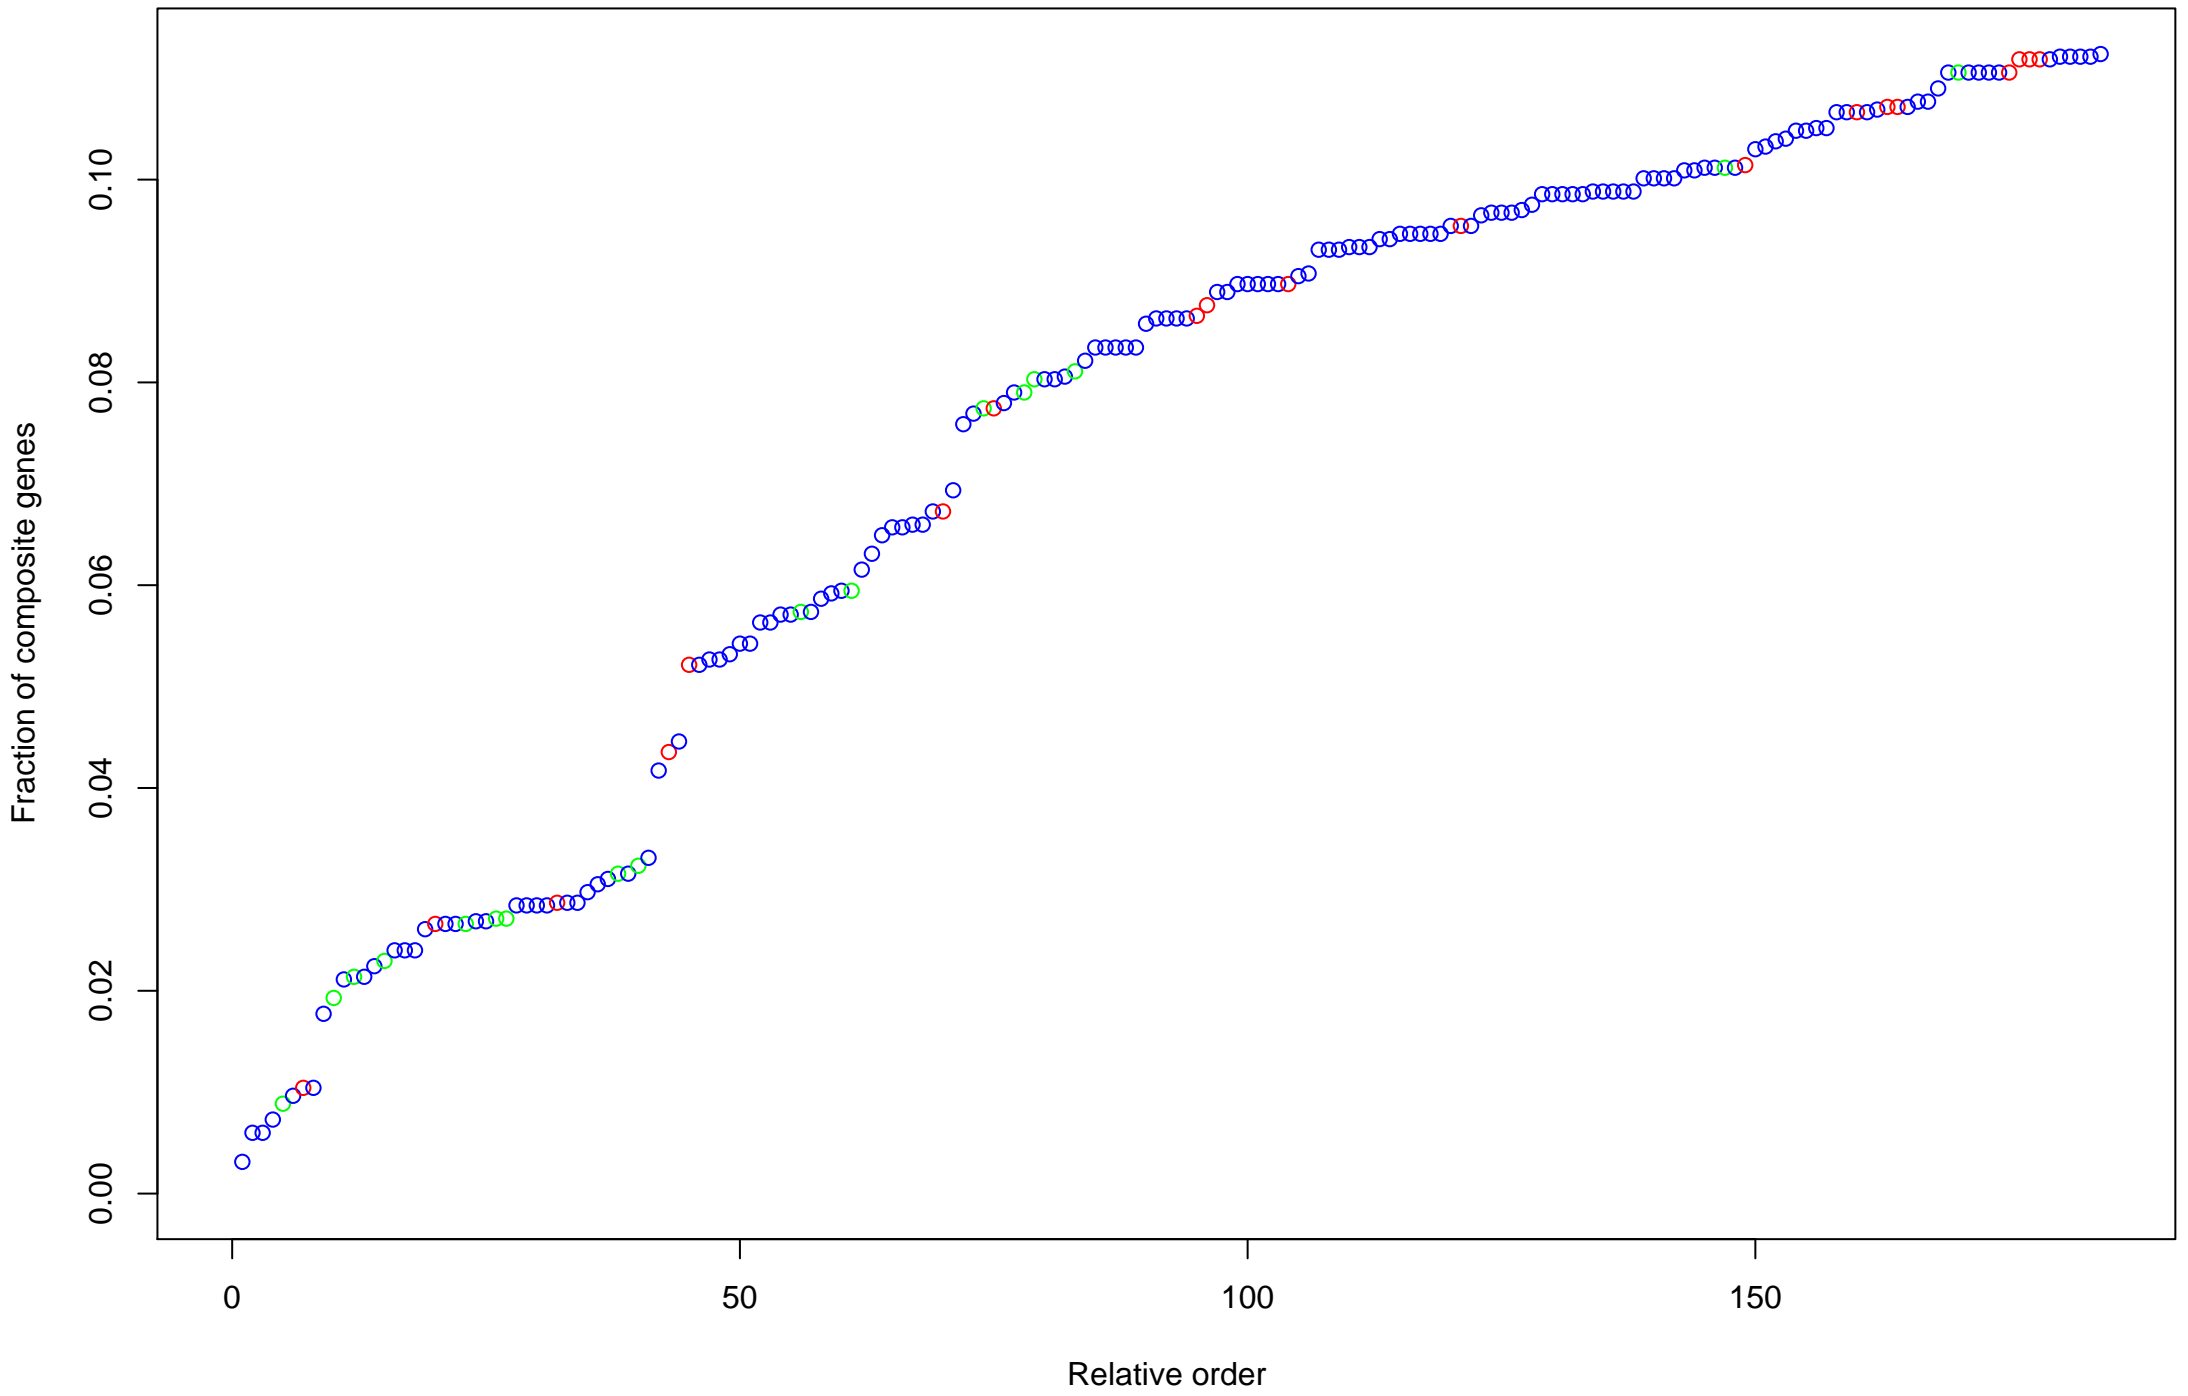

# PAER-PAO-01 (*Pseudomonas aeruginosa*)

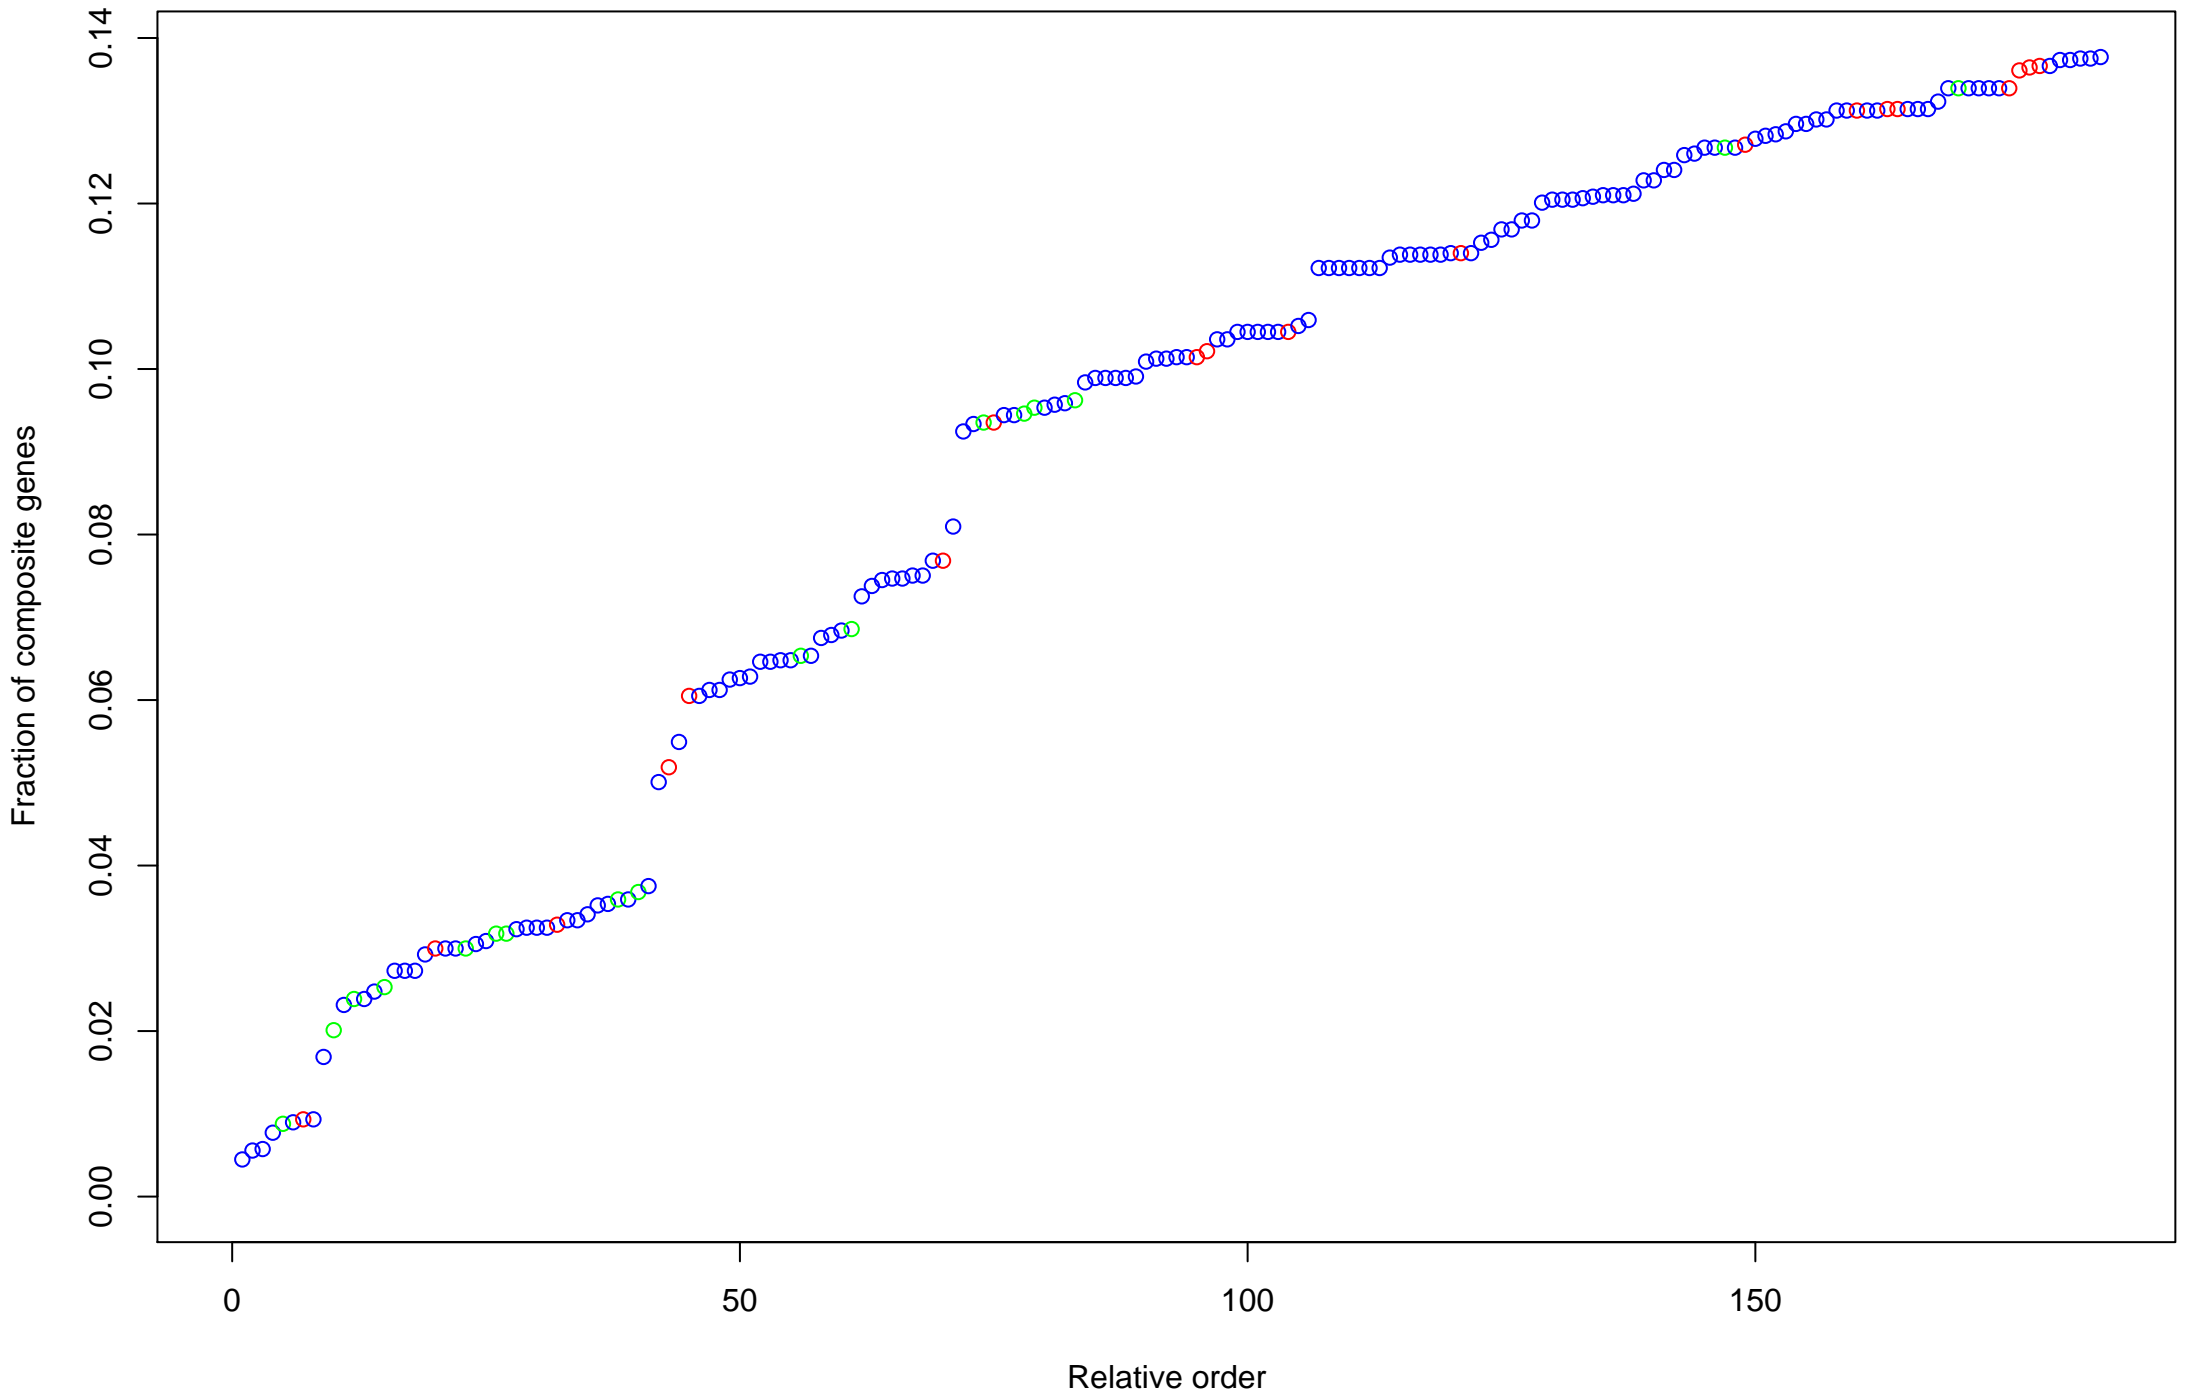

# BUCH-APS-01 (Buchnera sp.)

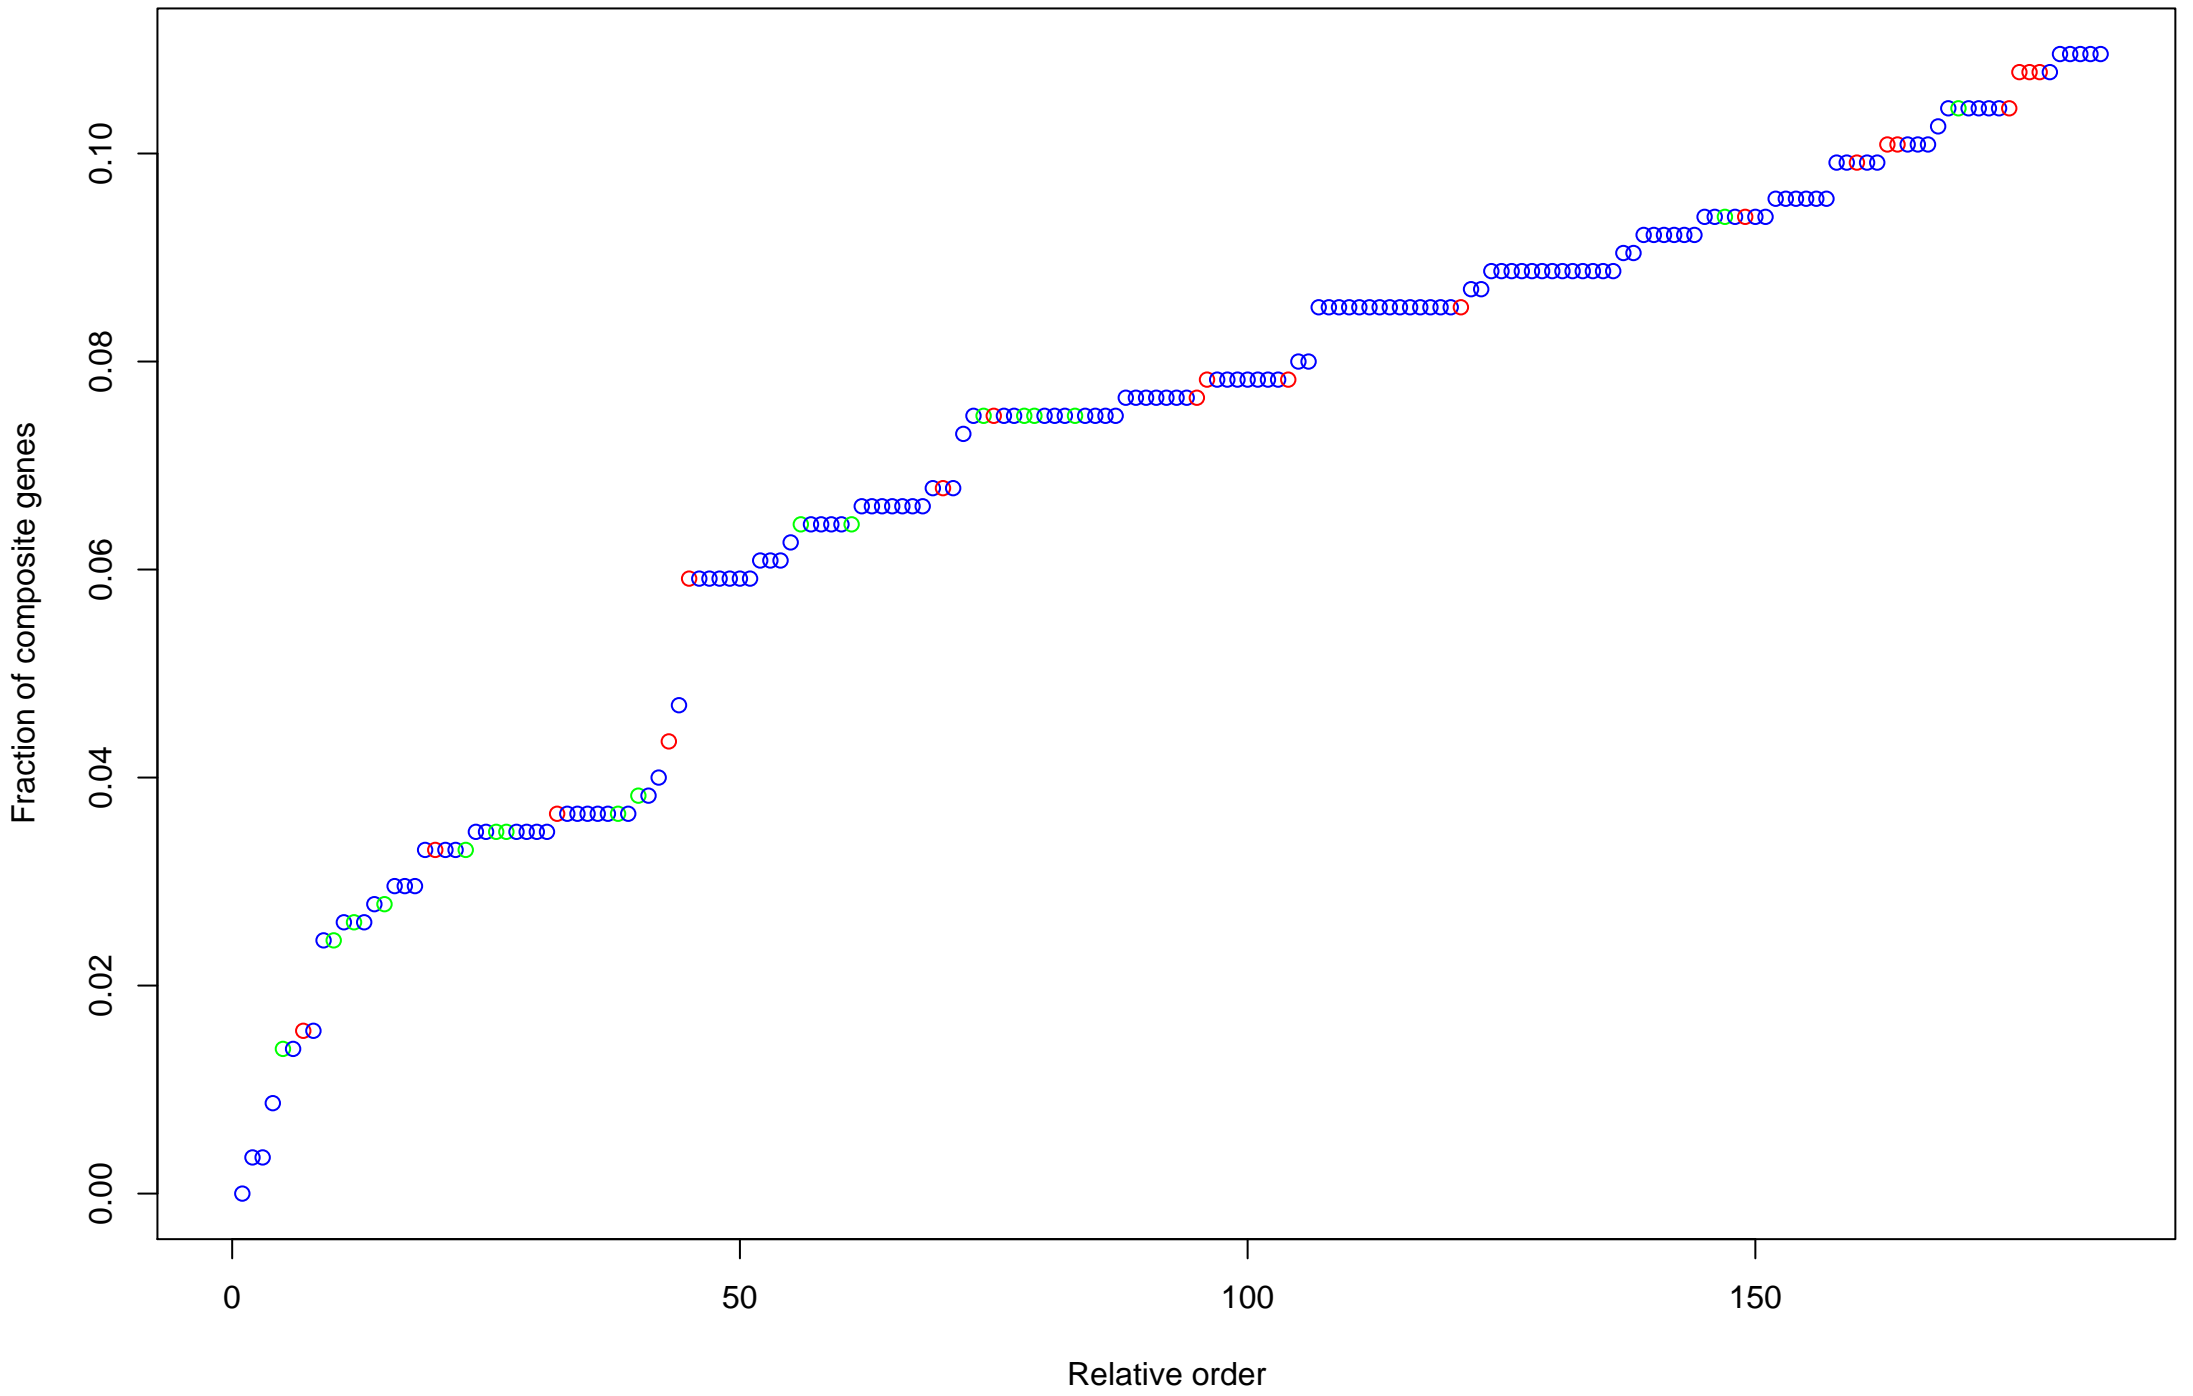

# TACI-DSM-01 (*Thermoplasma acidophilum*)

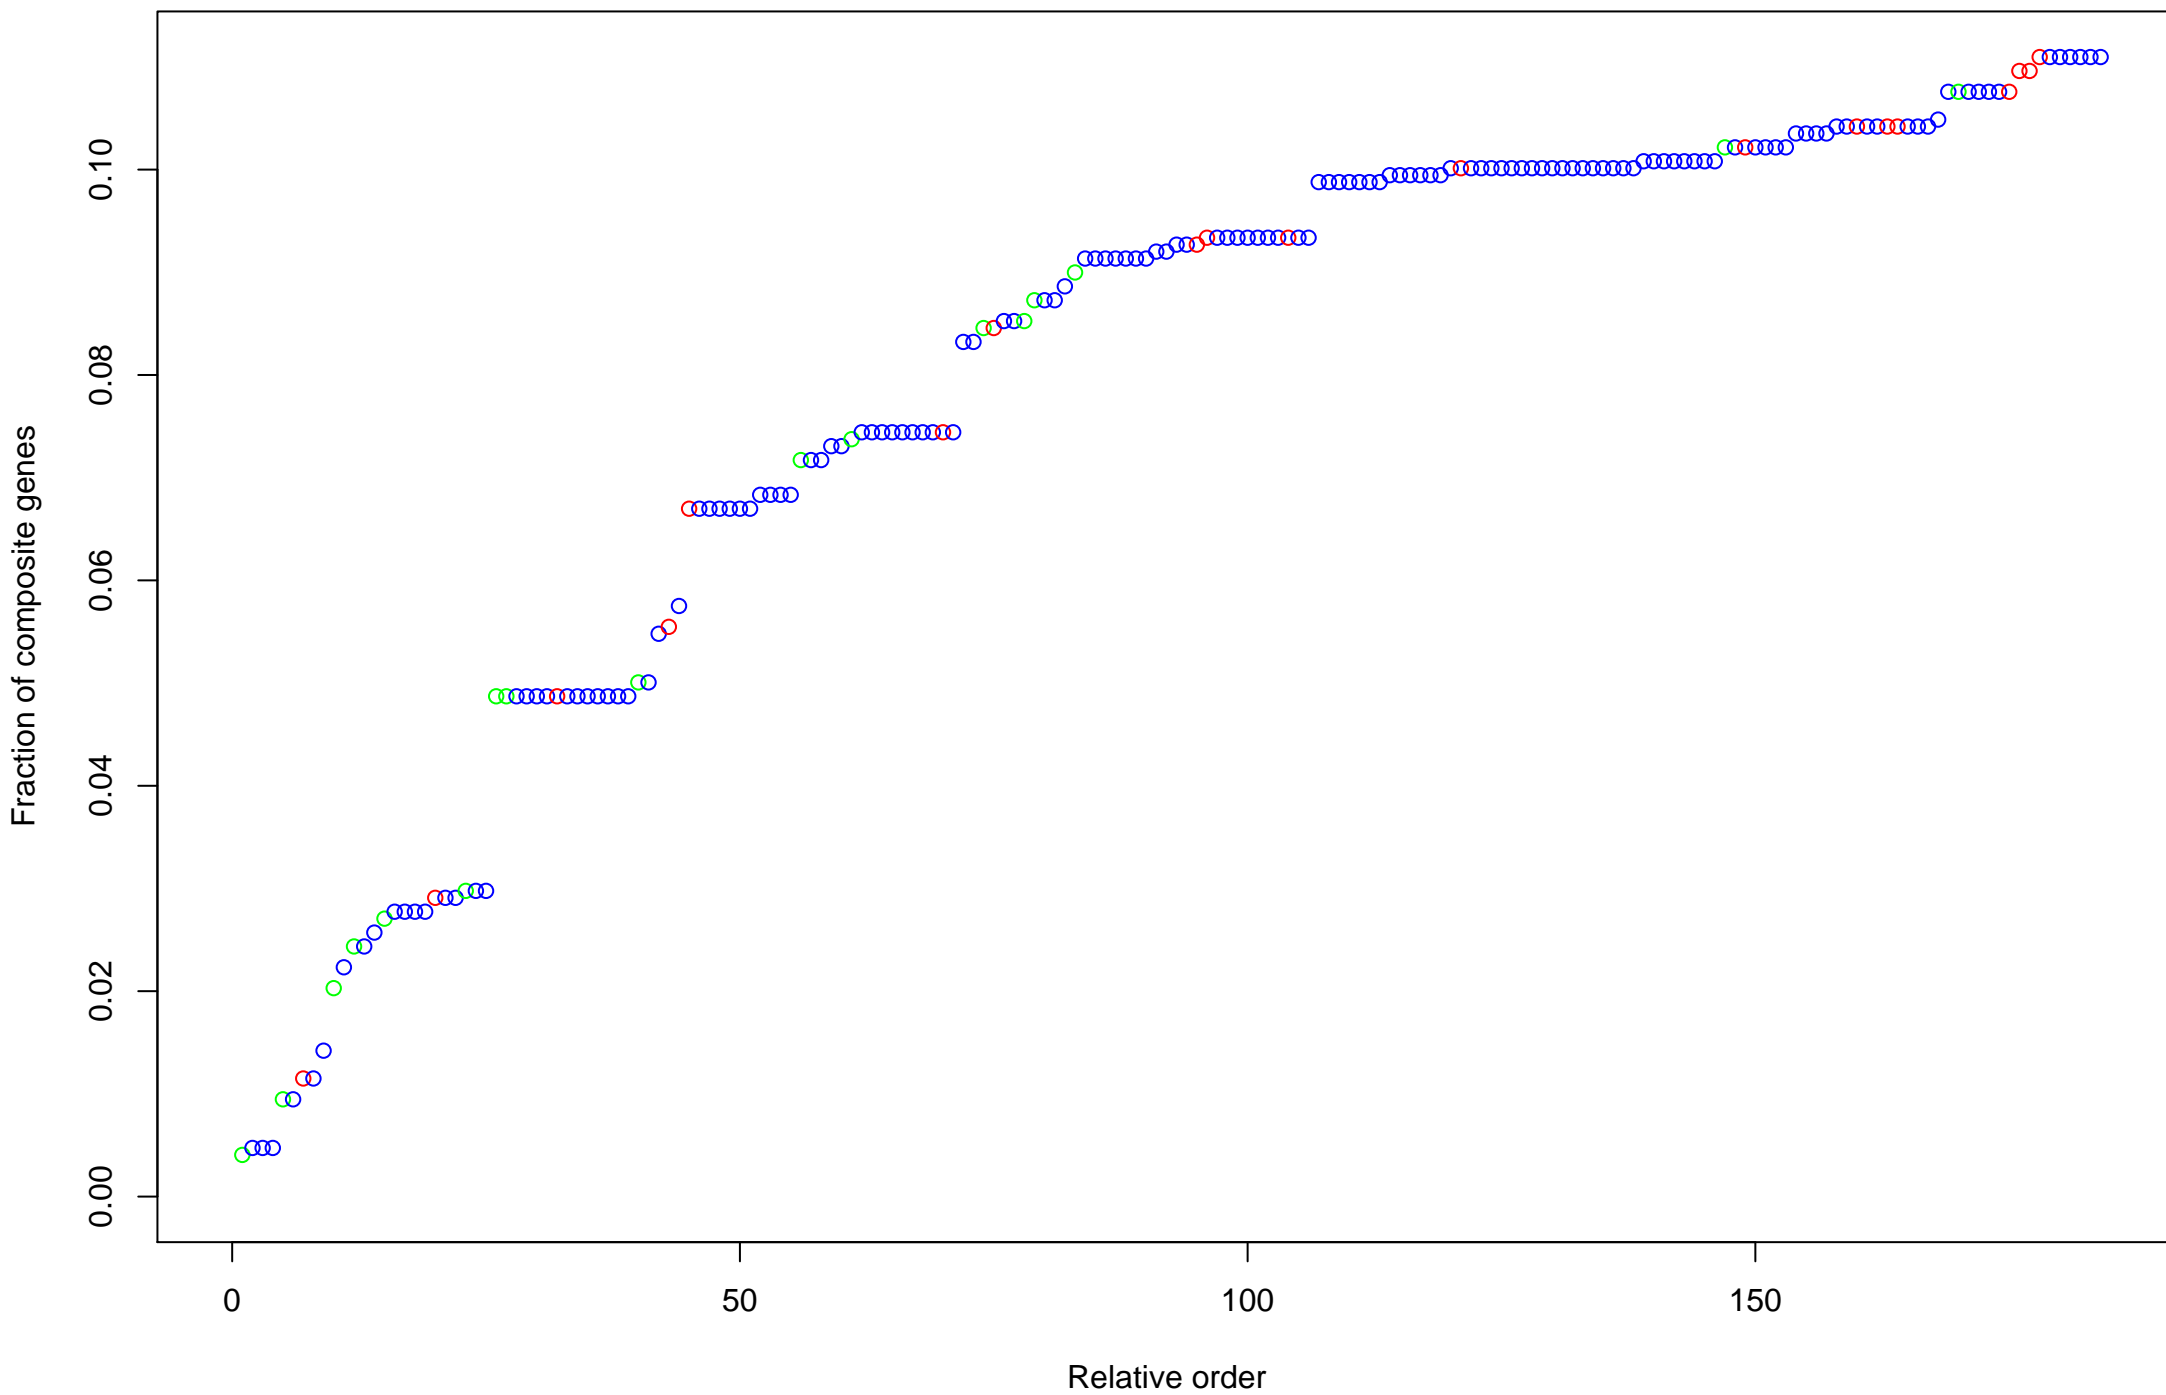

# UURE-SV3-01 (*Ureaplasma urealyticum*)

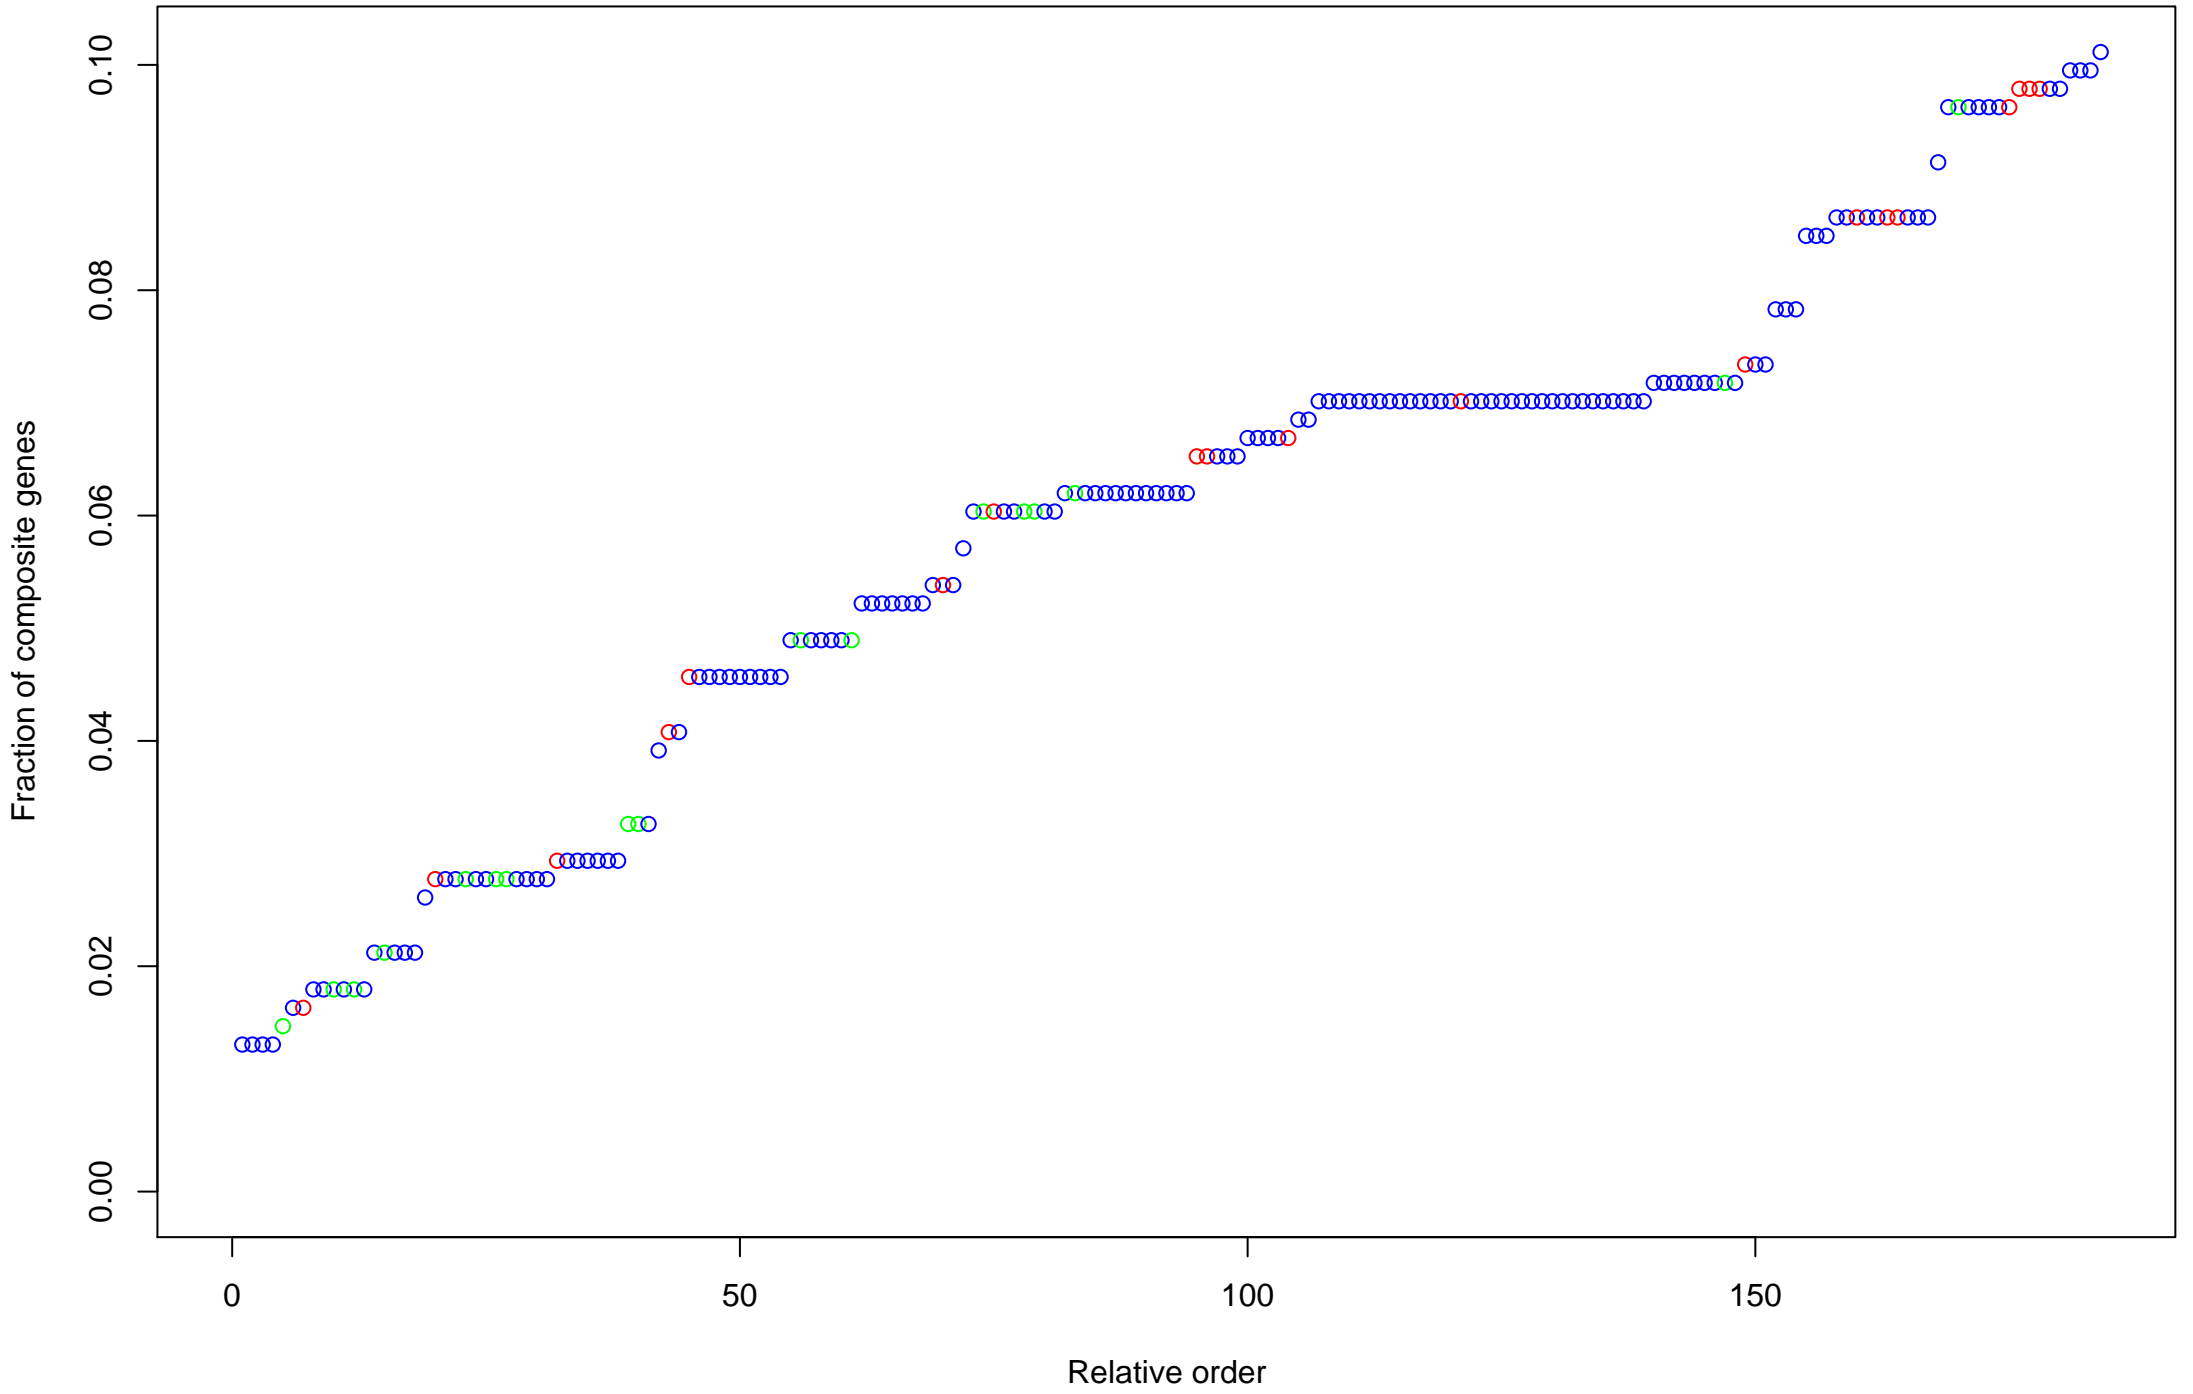

# HALO-NRC-01 (Halobacterium sp.)

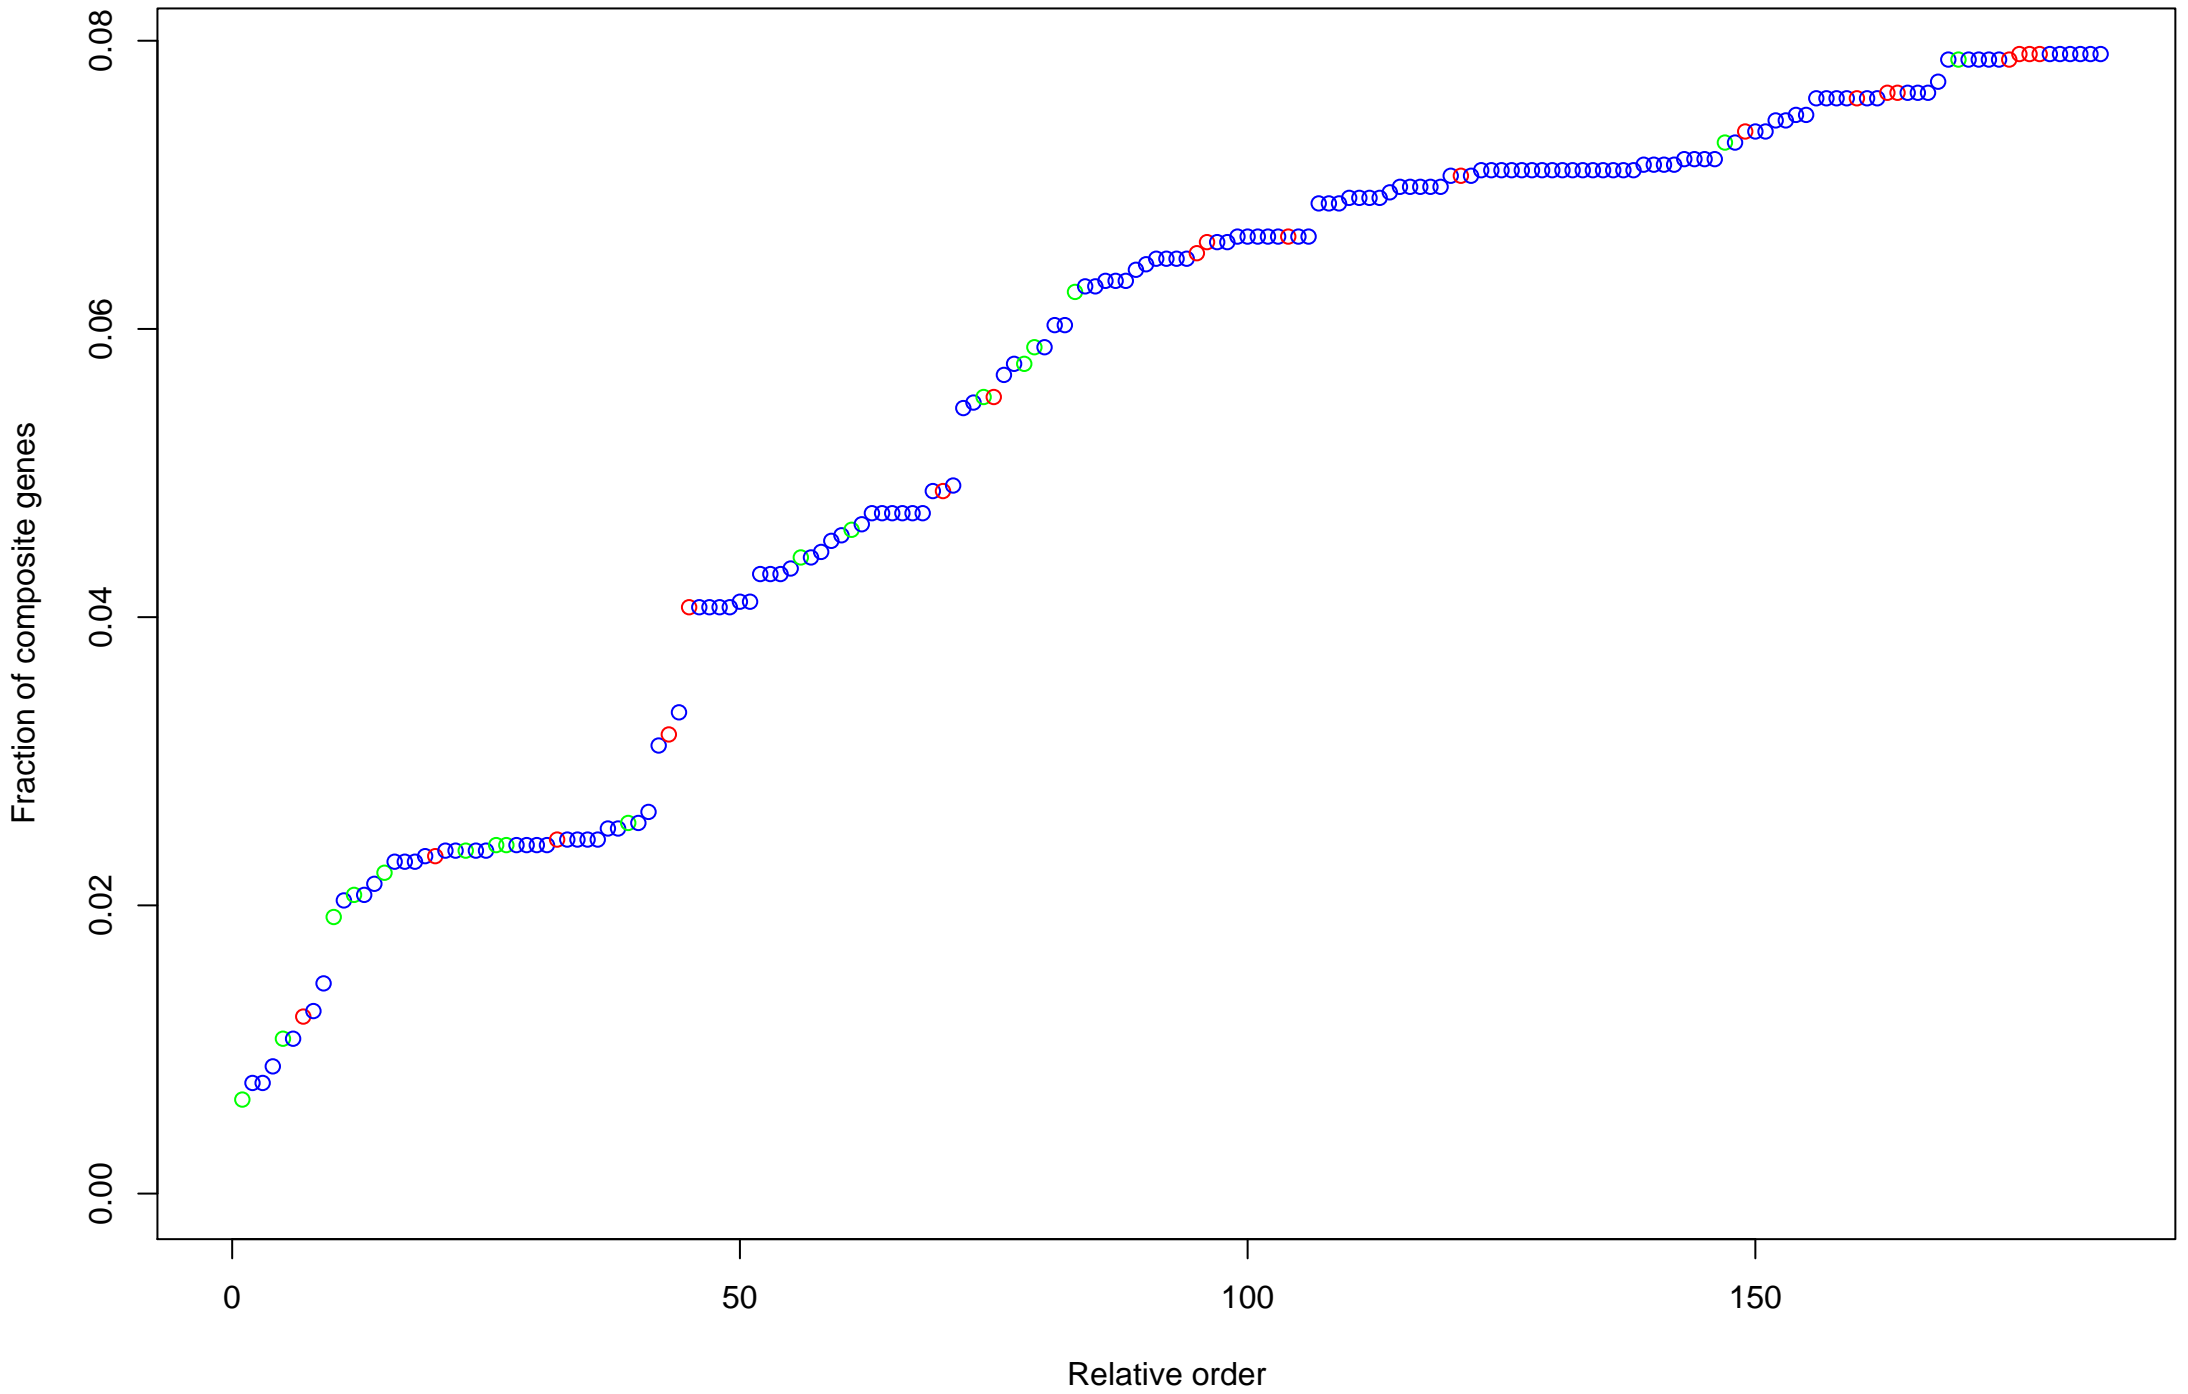



# BHAL-C12-01 (*Bacillus halodurans*)

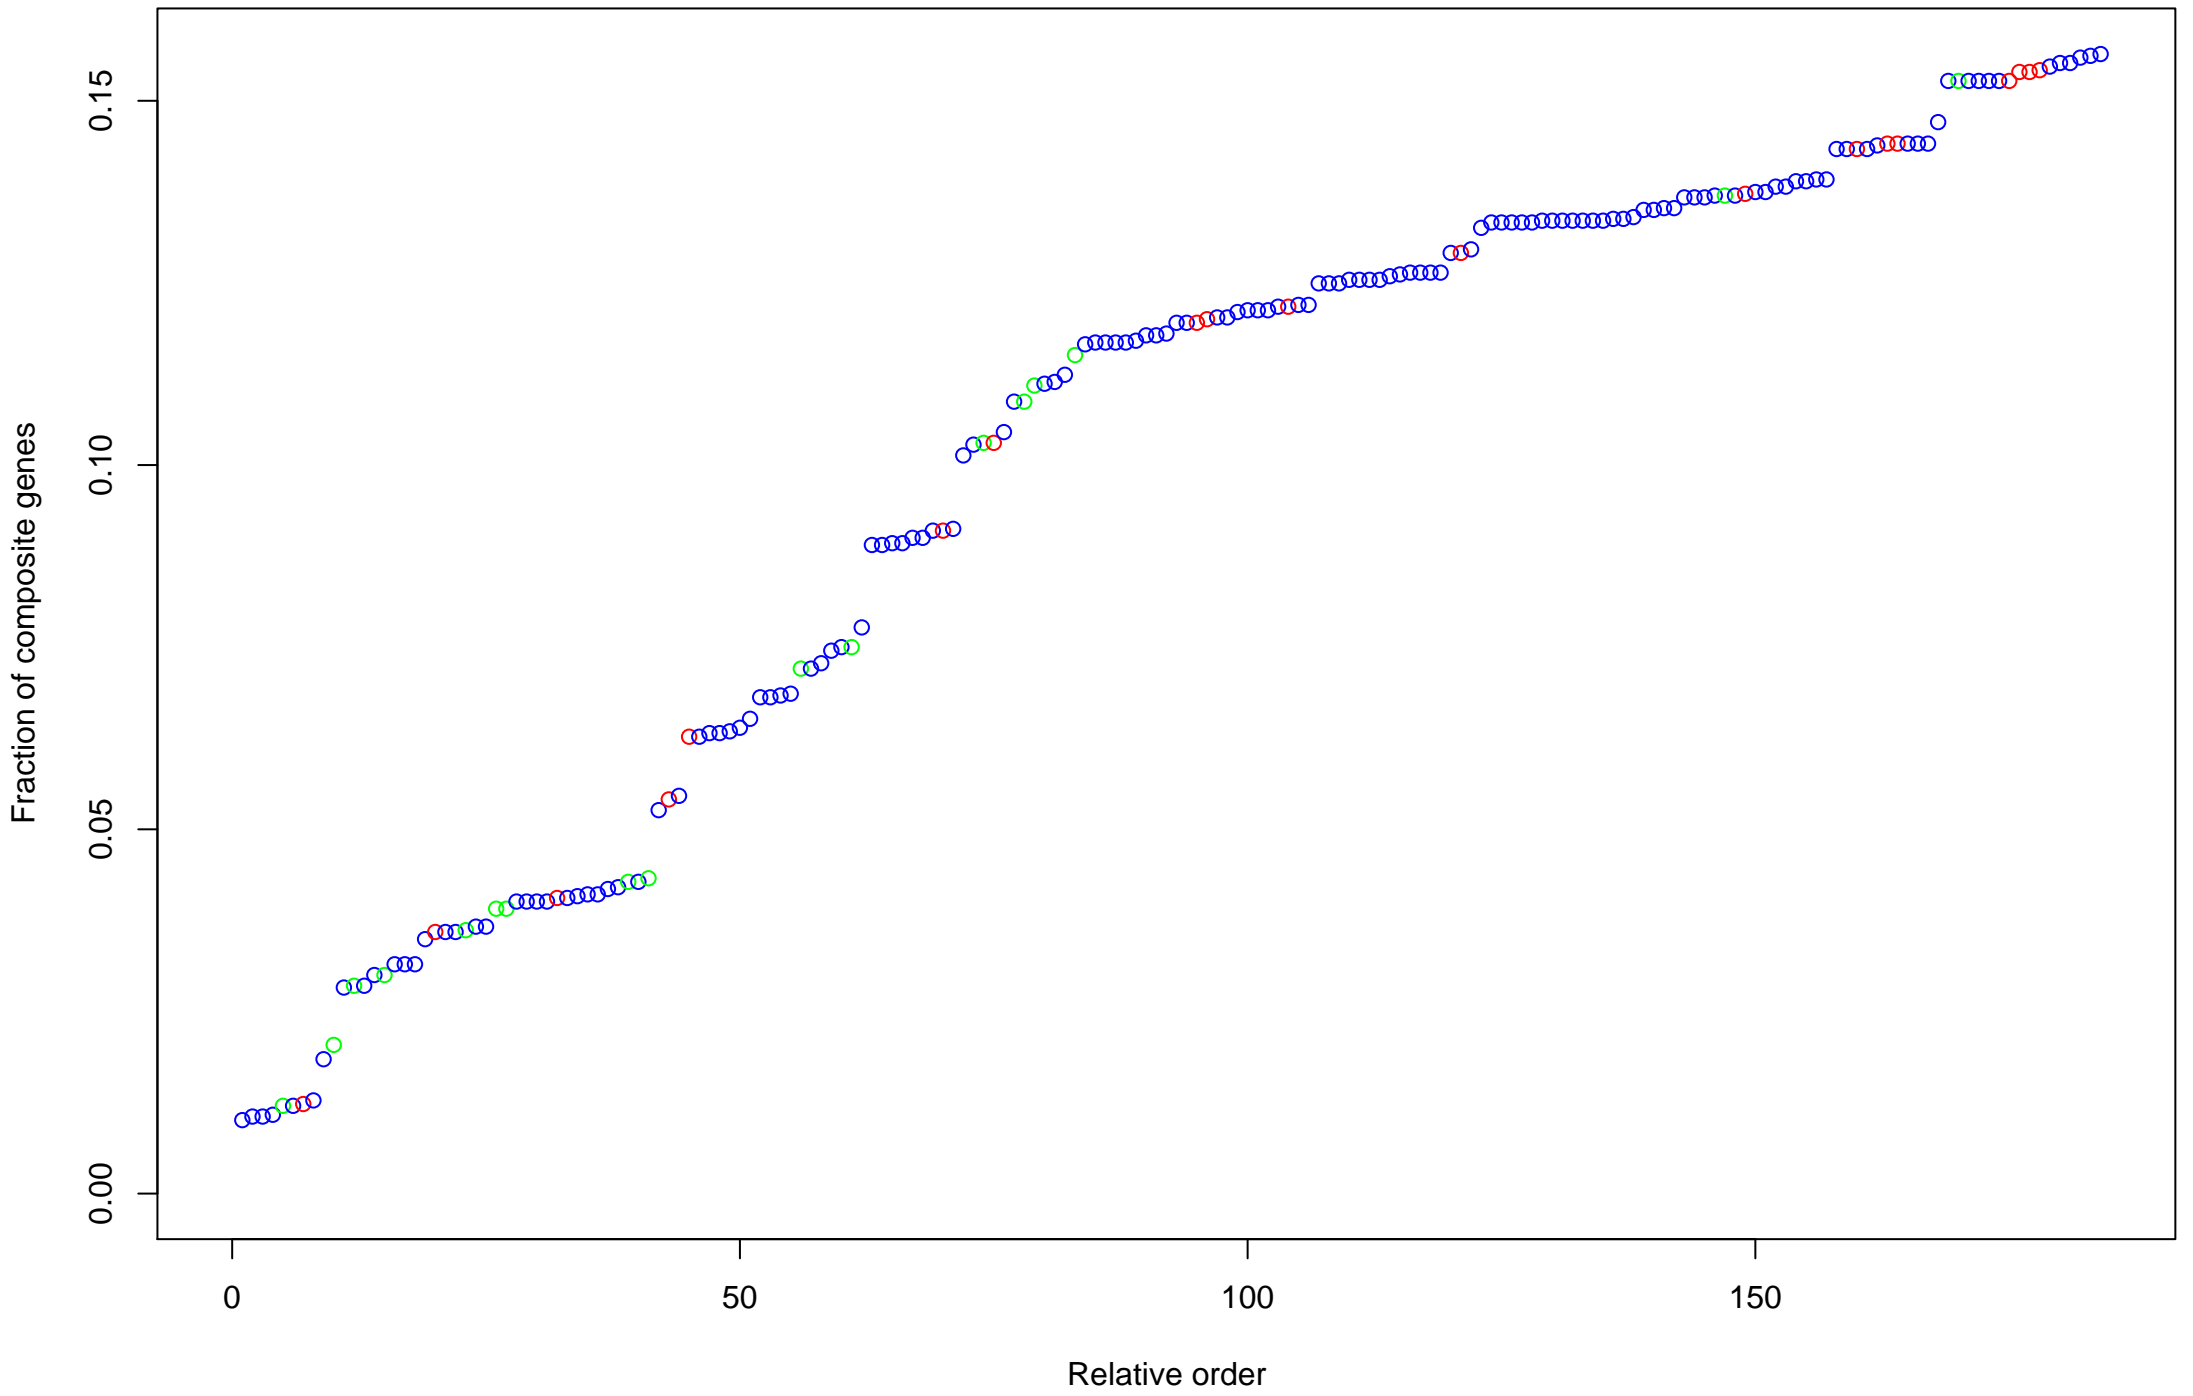

# MLOT-MAF-01 (*Mesorhizobium loti*)

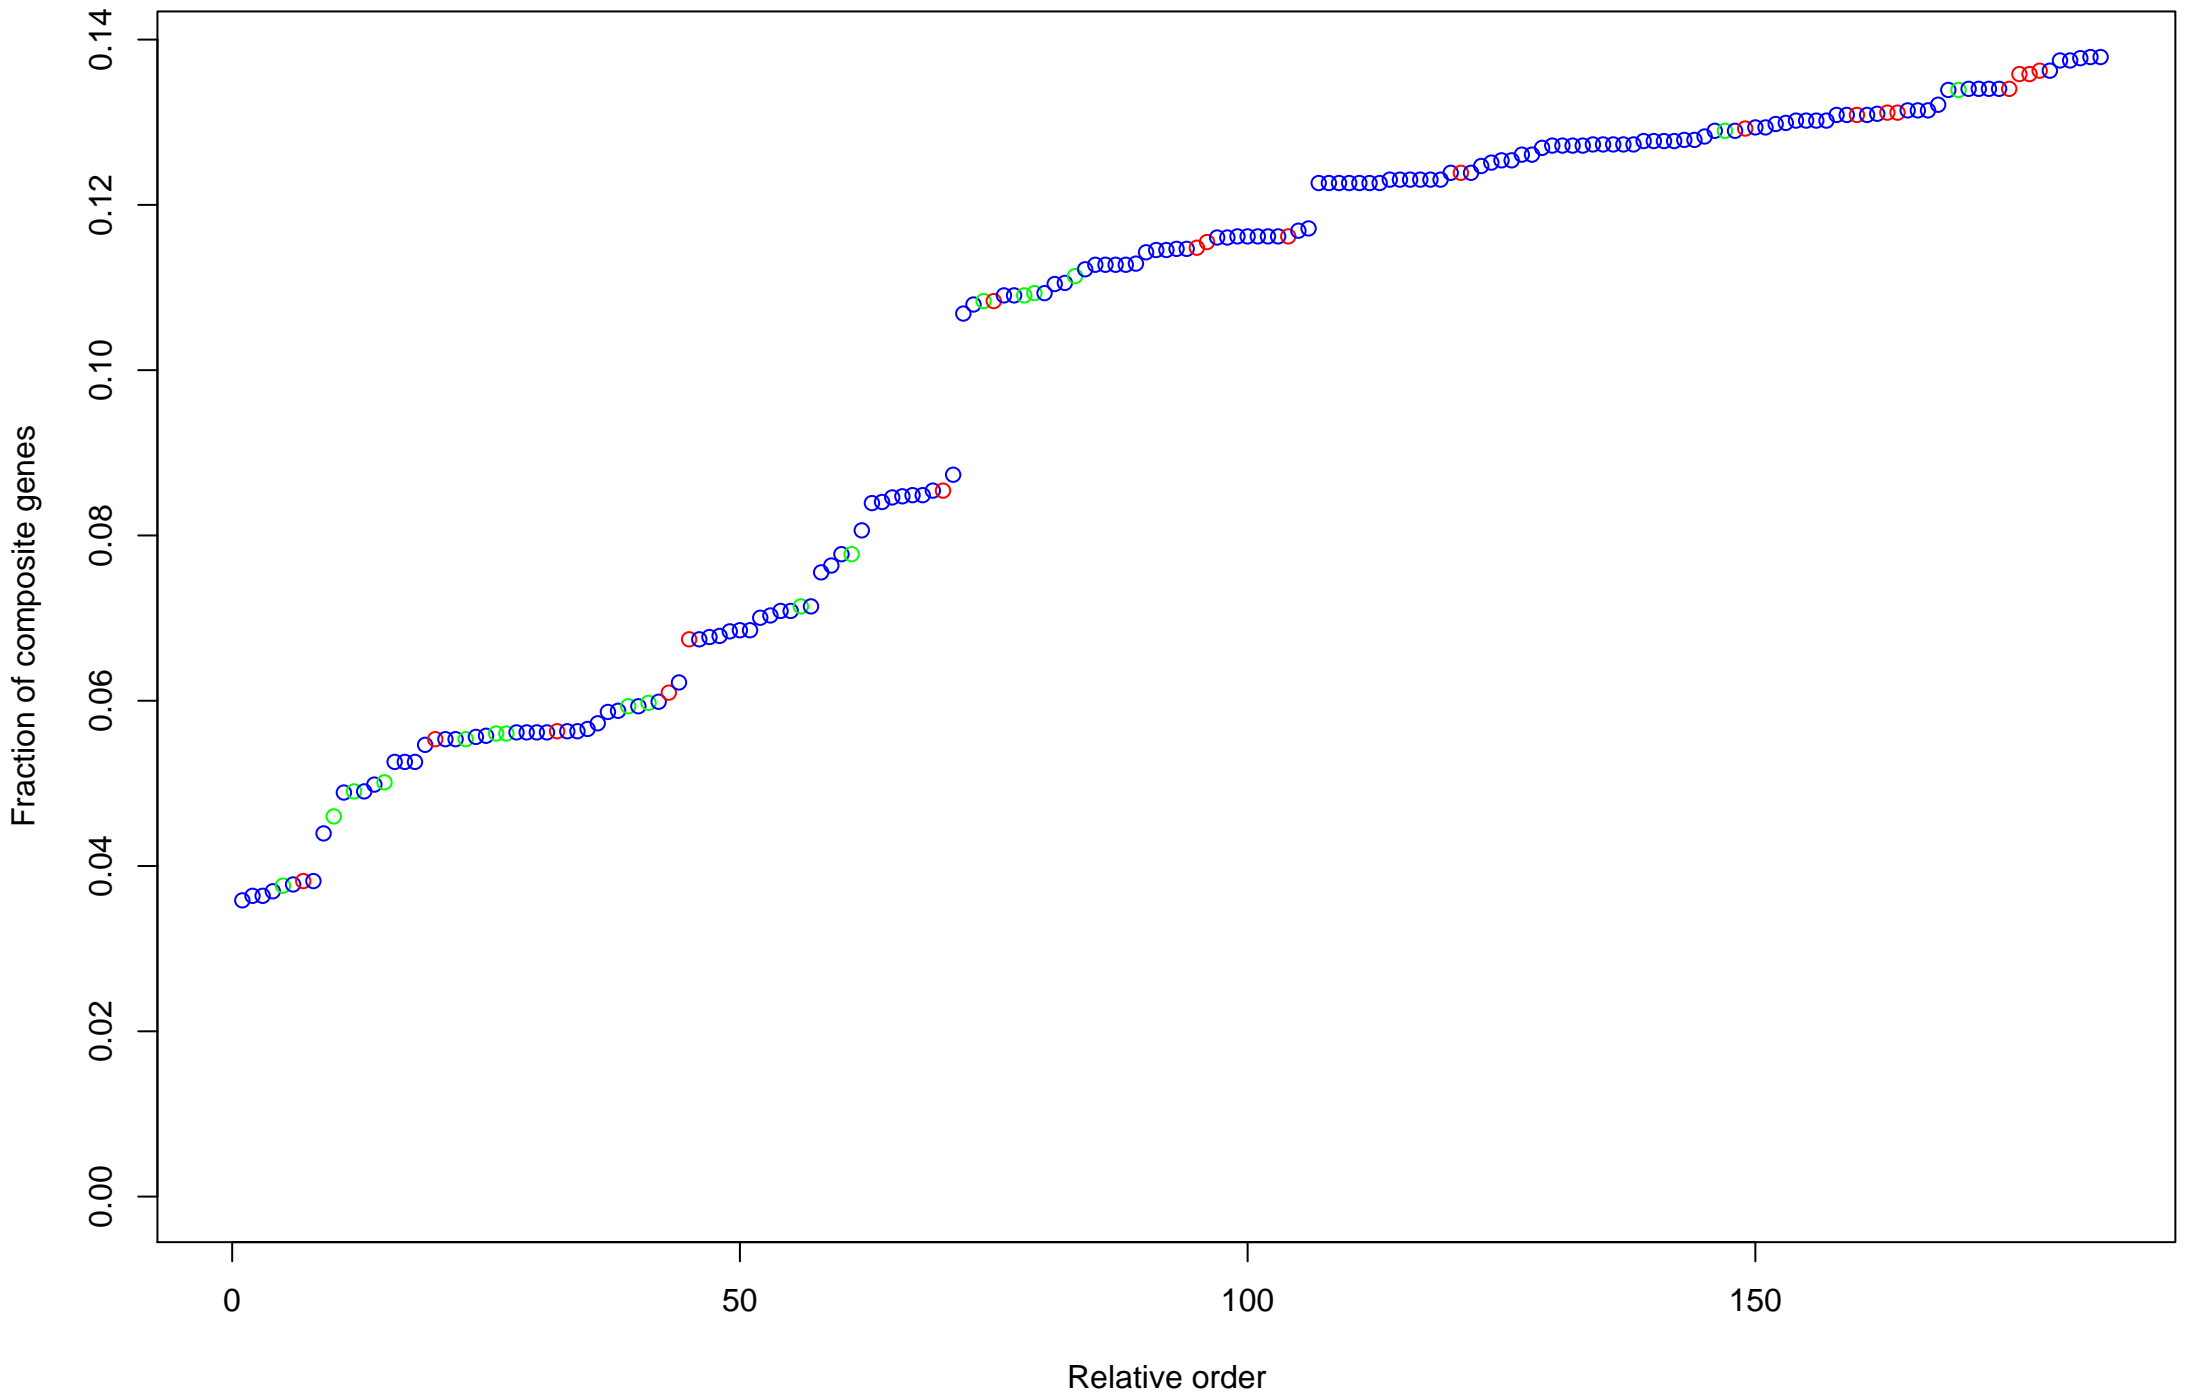

# ATHA-XXX-01 (*Arabidopsis thaliana*)

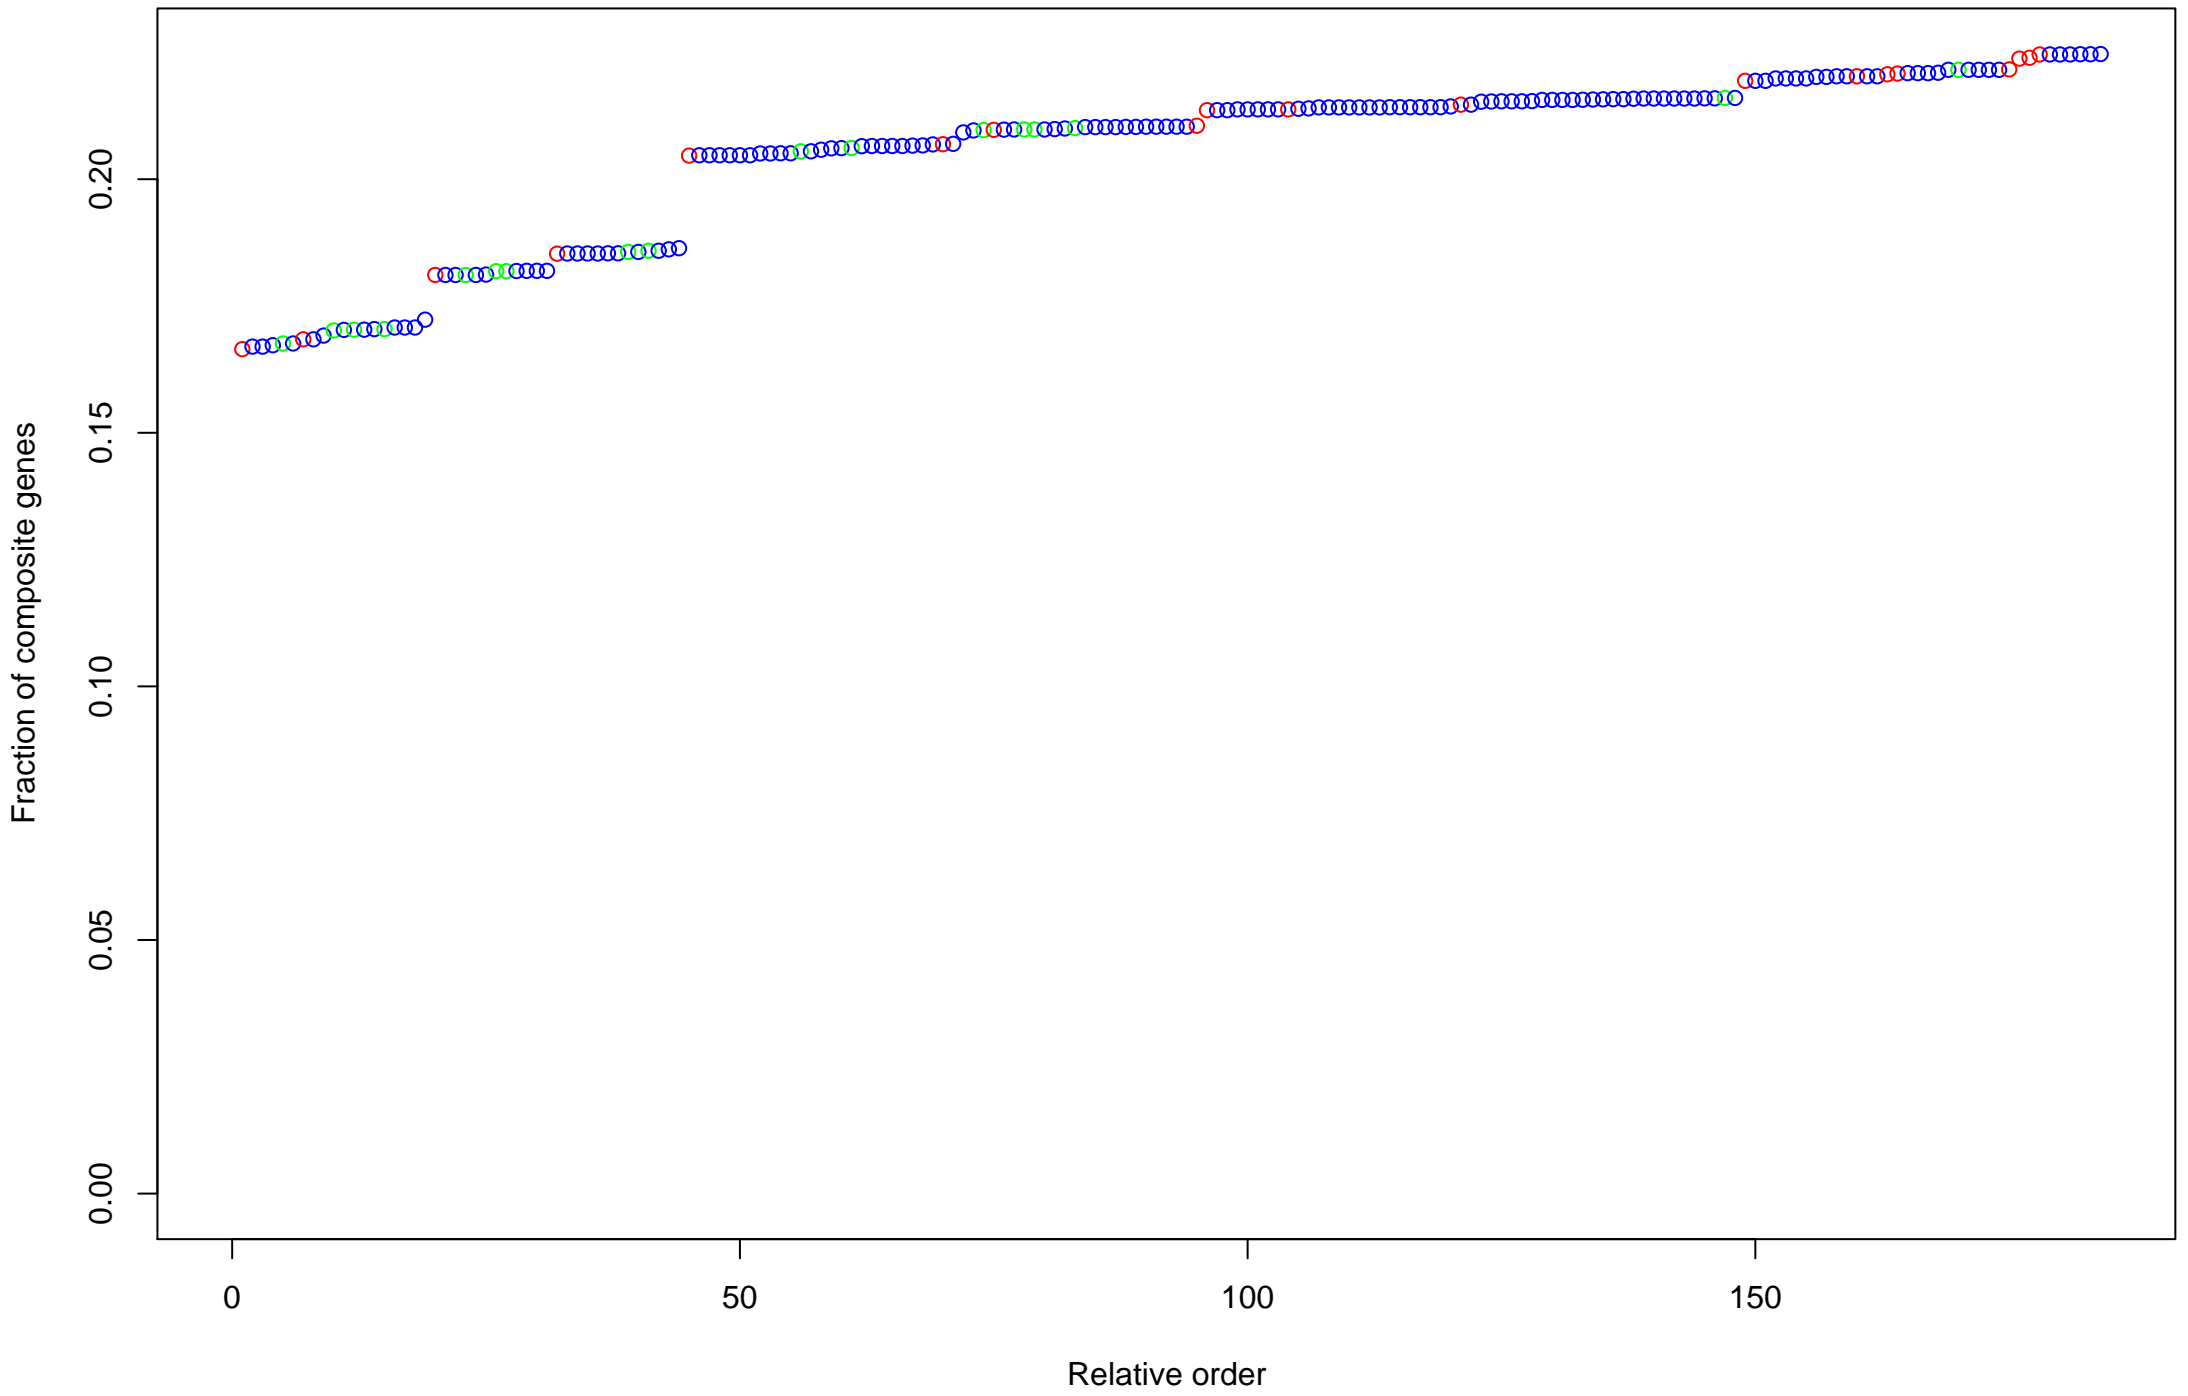

# ECOL-EDL-01 (Escherichia coli O157:H7)

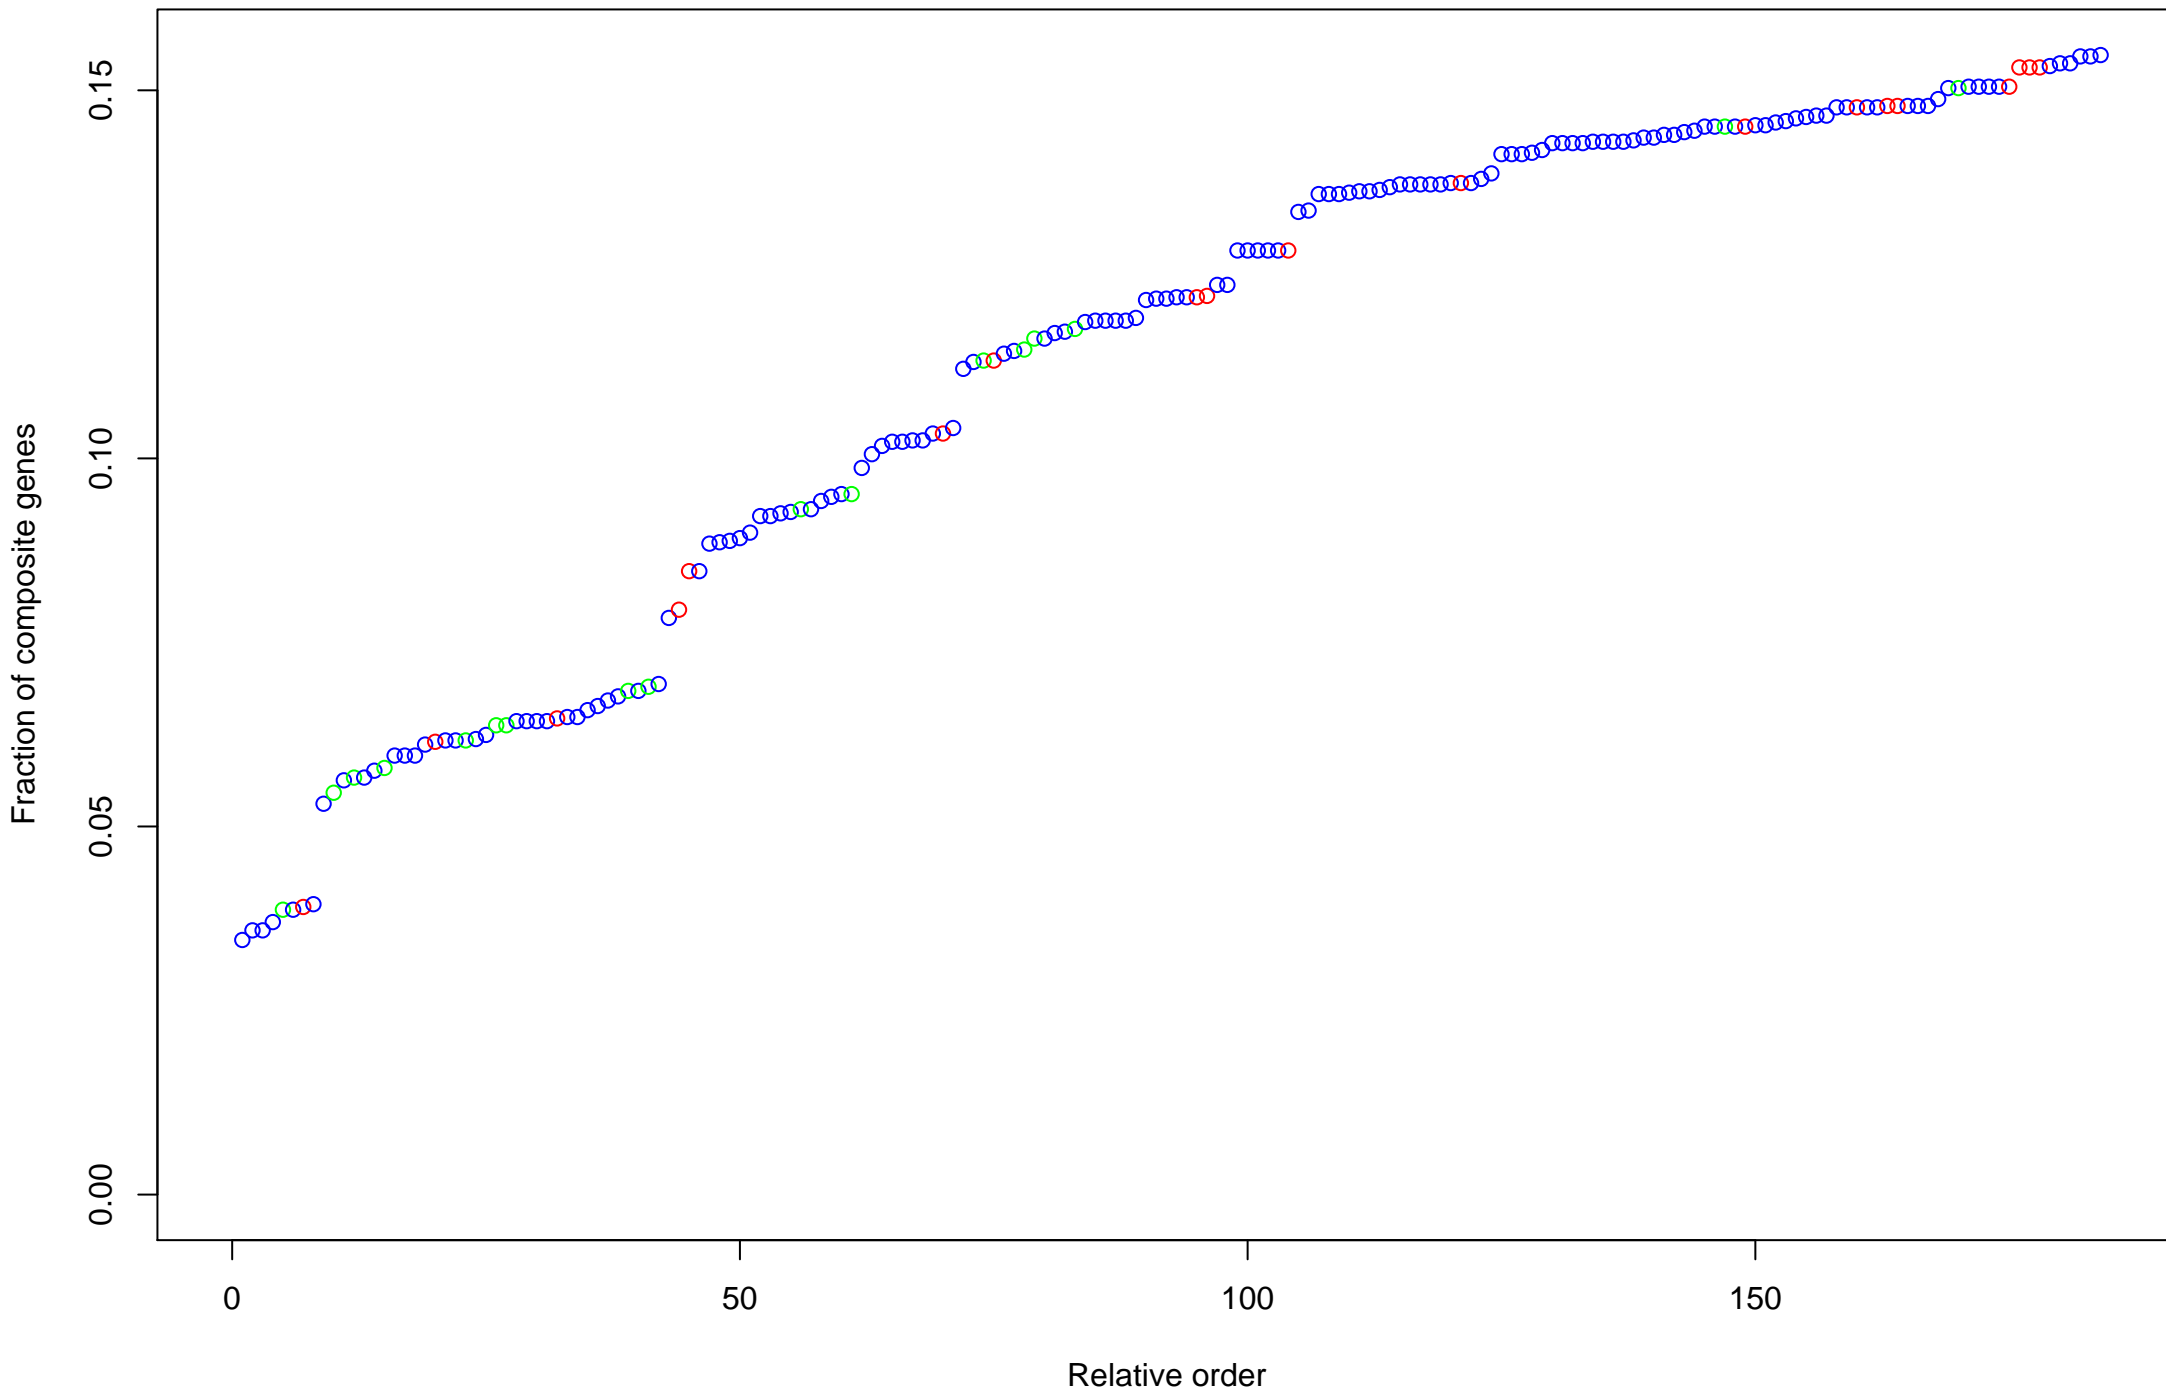

# HSAP-XXX-03 (Homo sapiens)

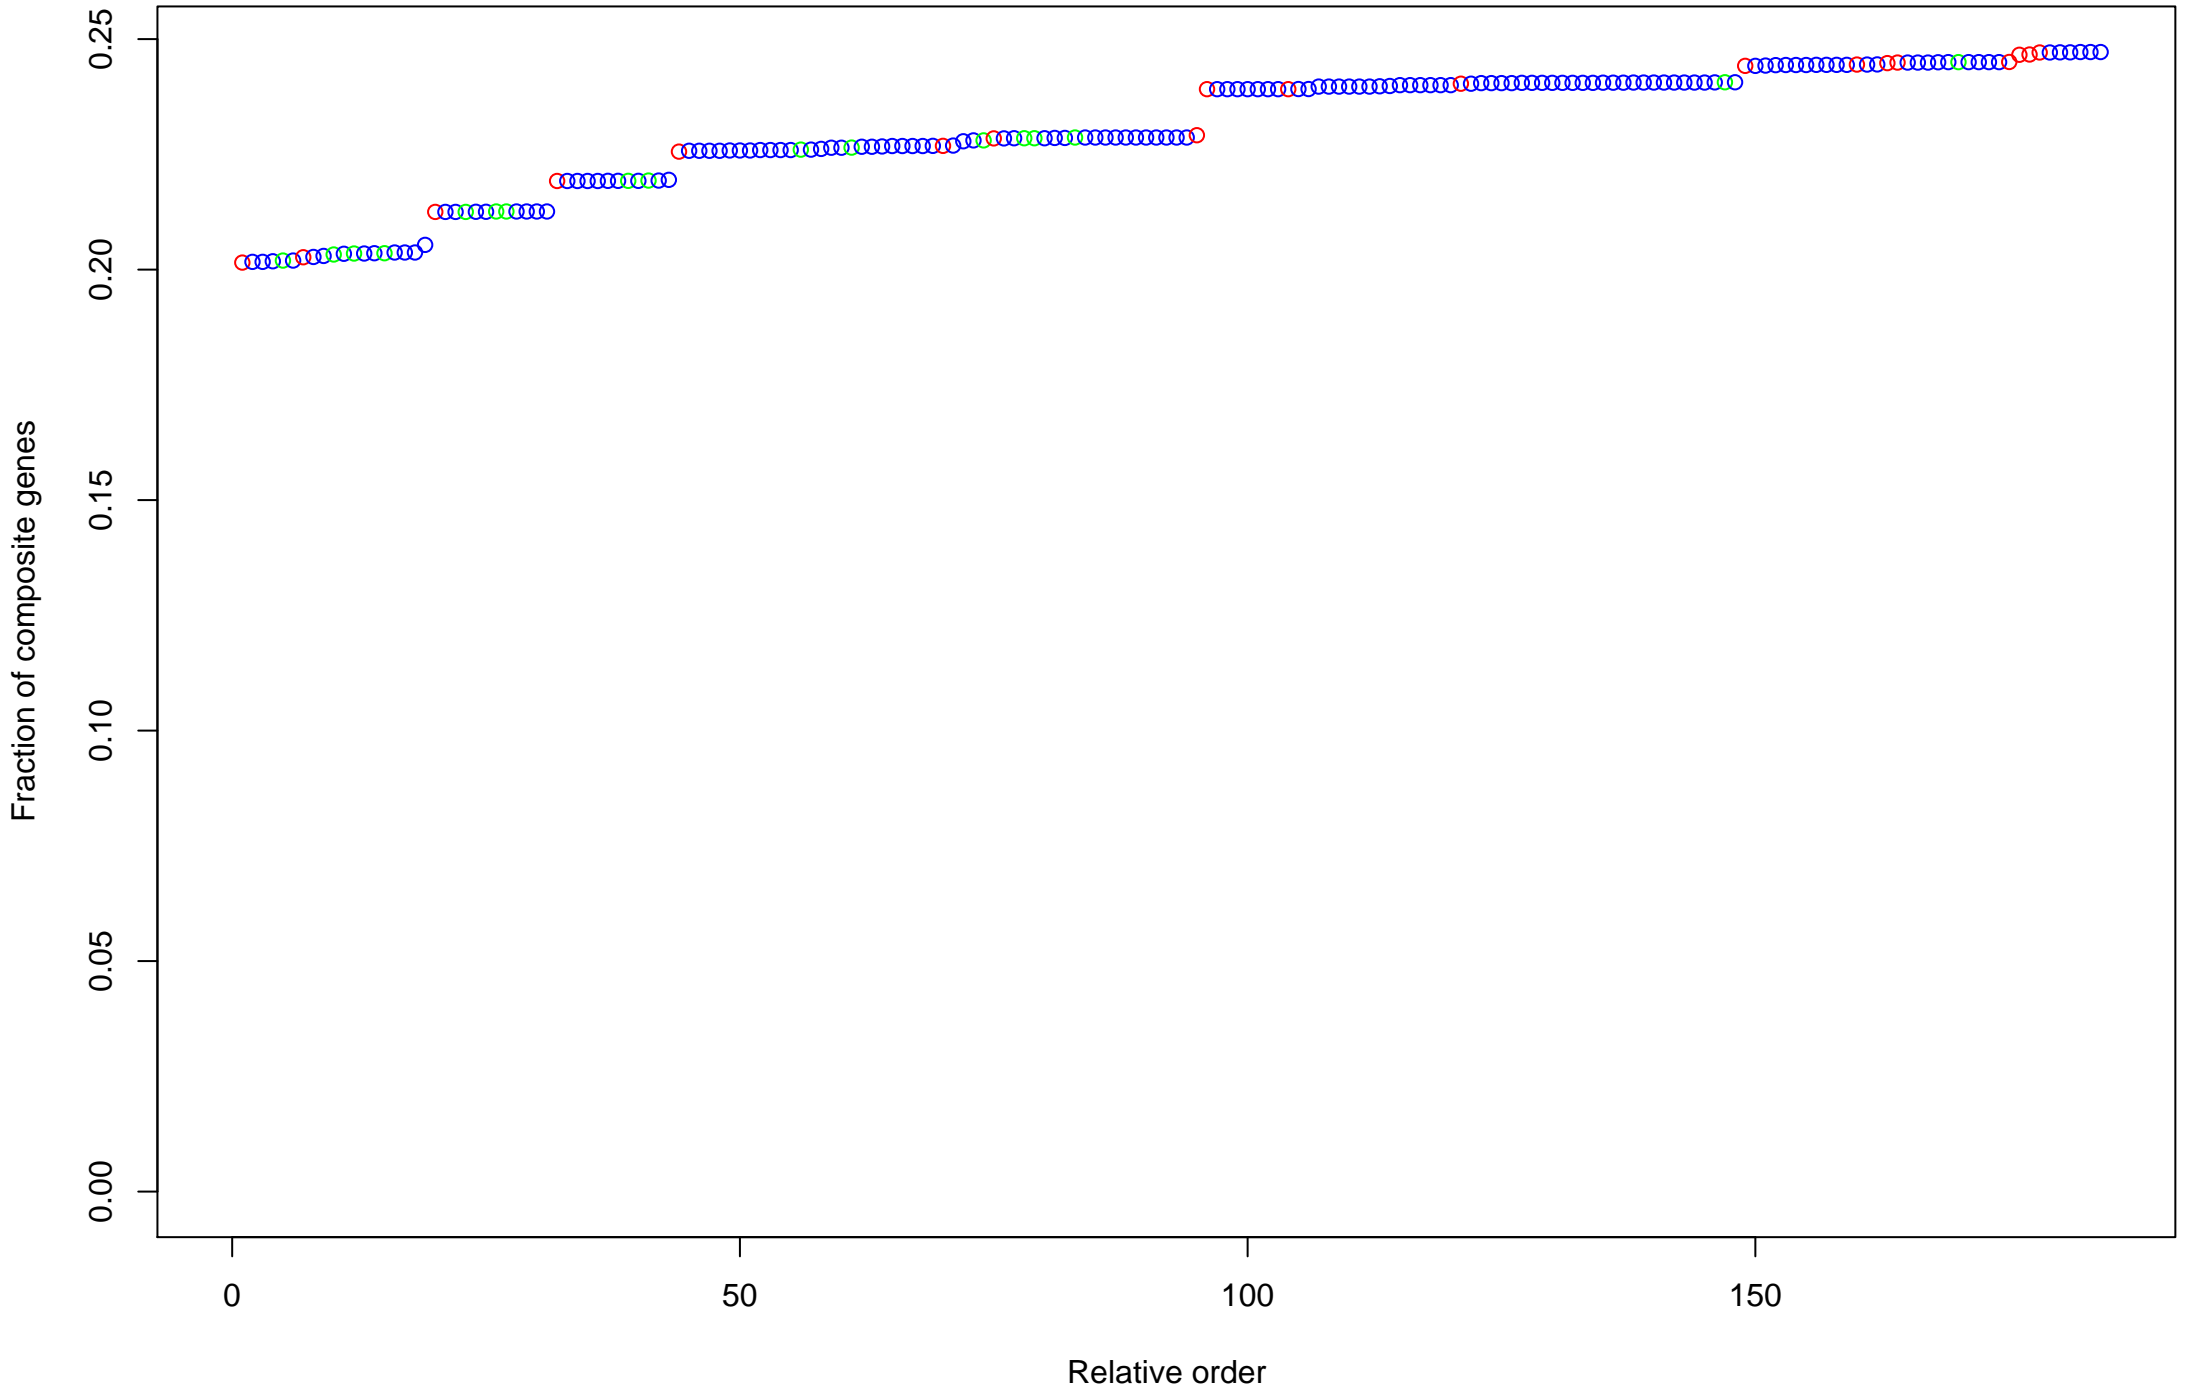

# MLEP-XTN-01 (*Mycobacterium leprae*)

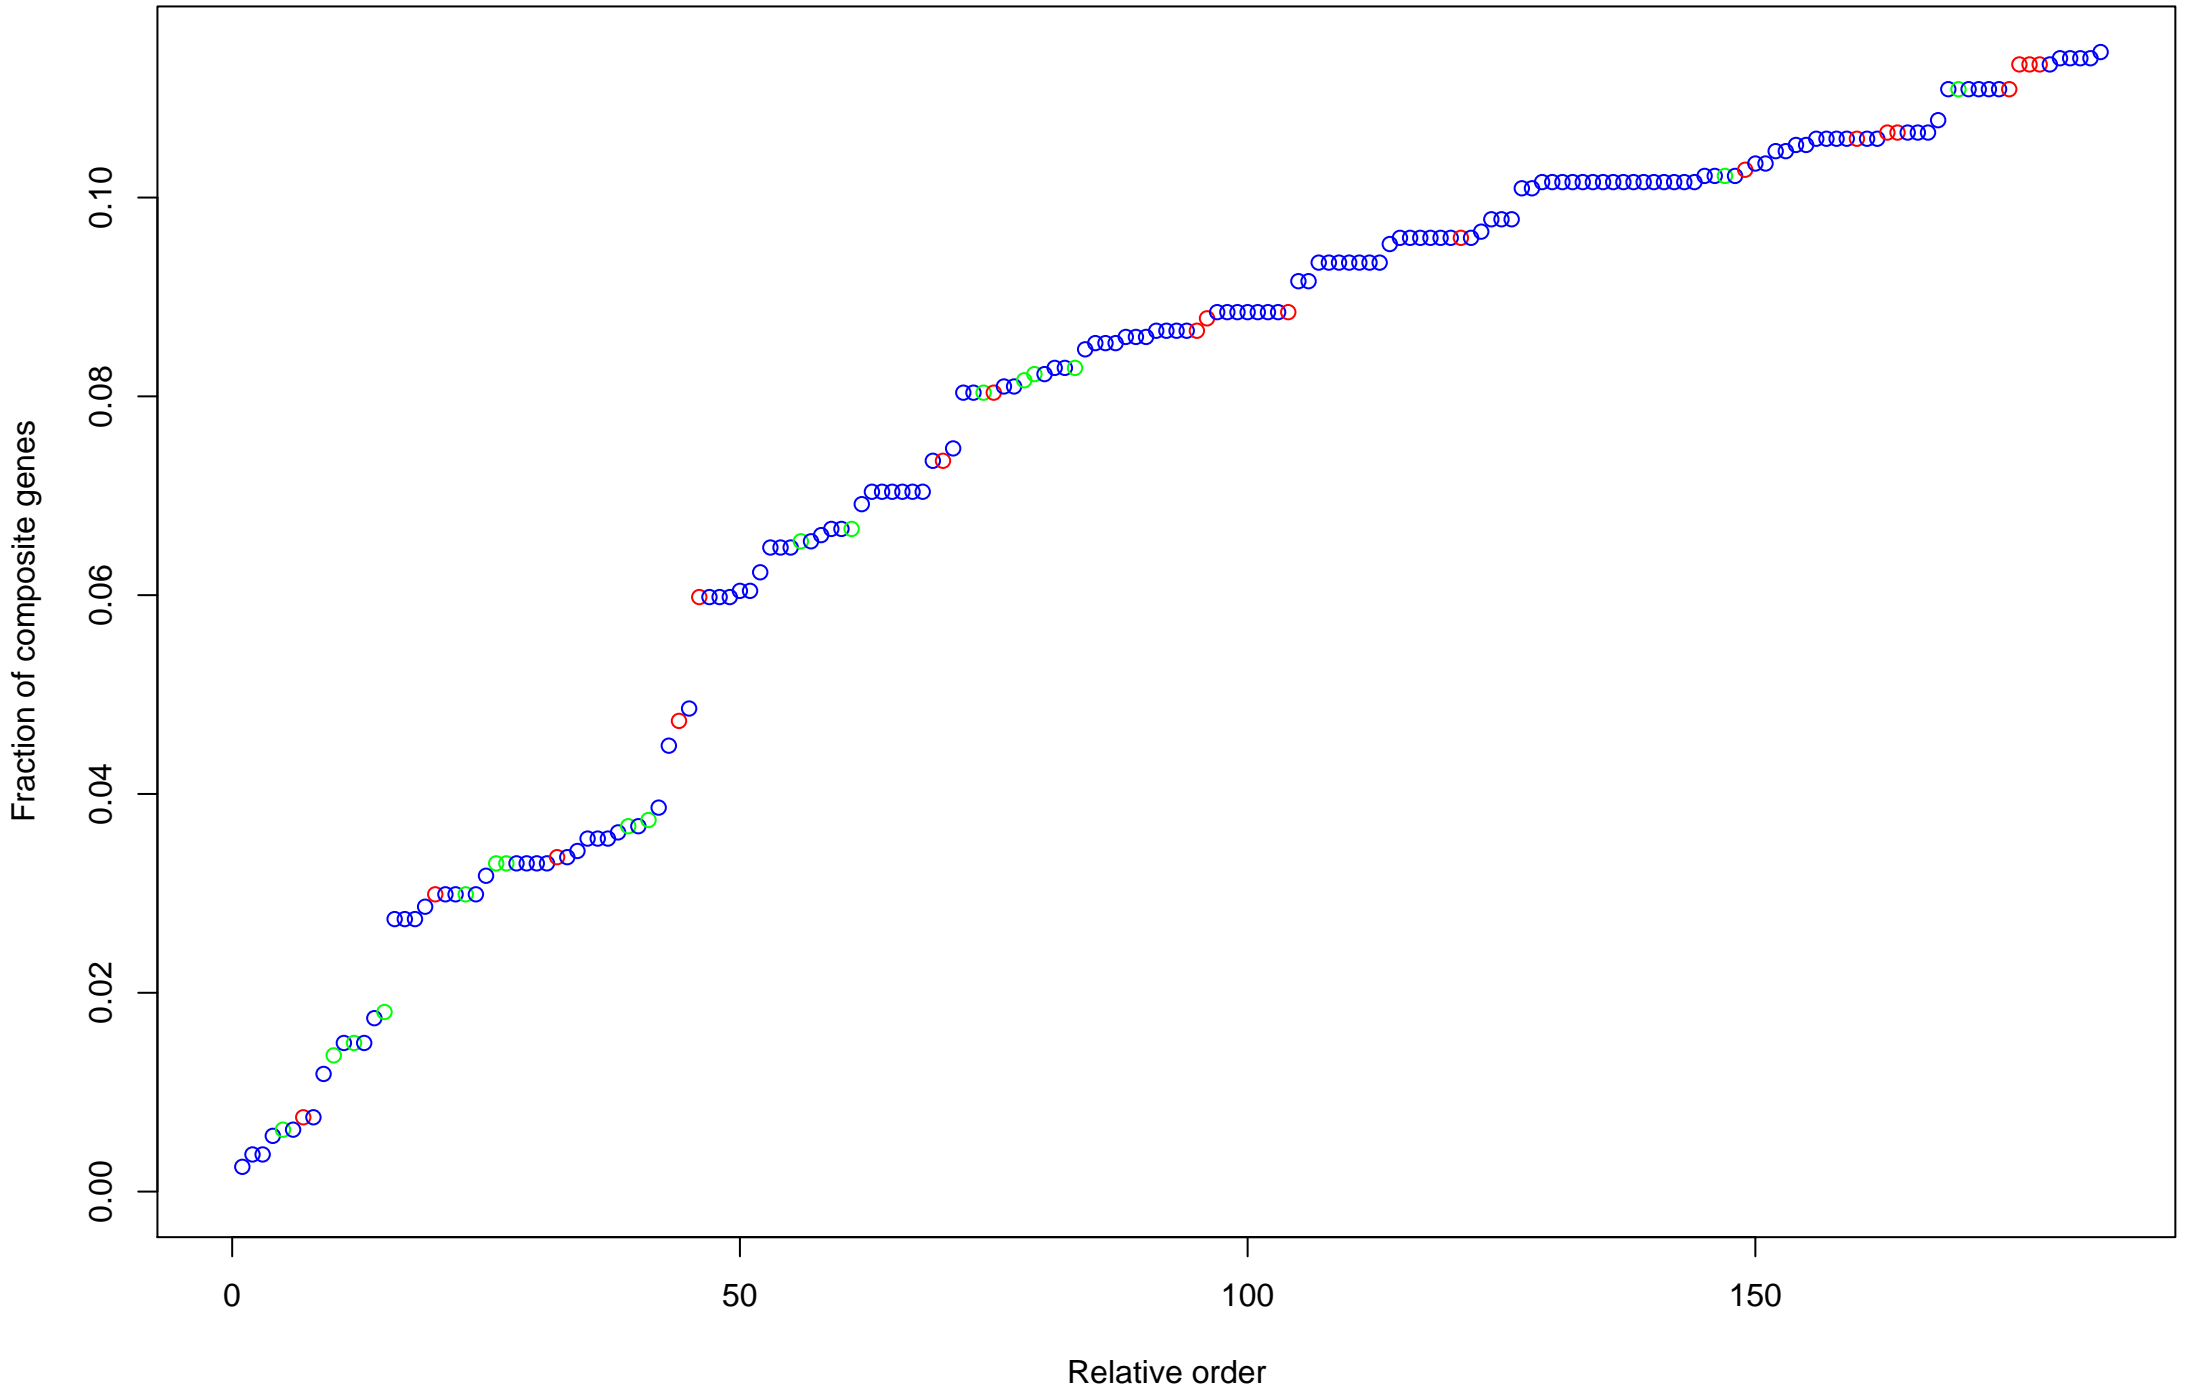

# ECOL-RIM-01 (Escherichia coli 0157:H7)

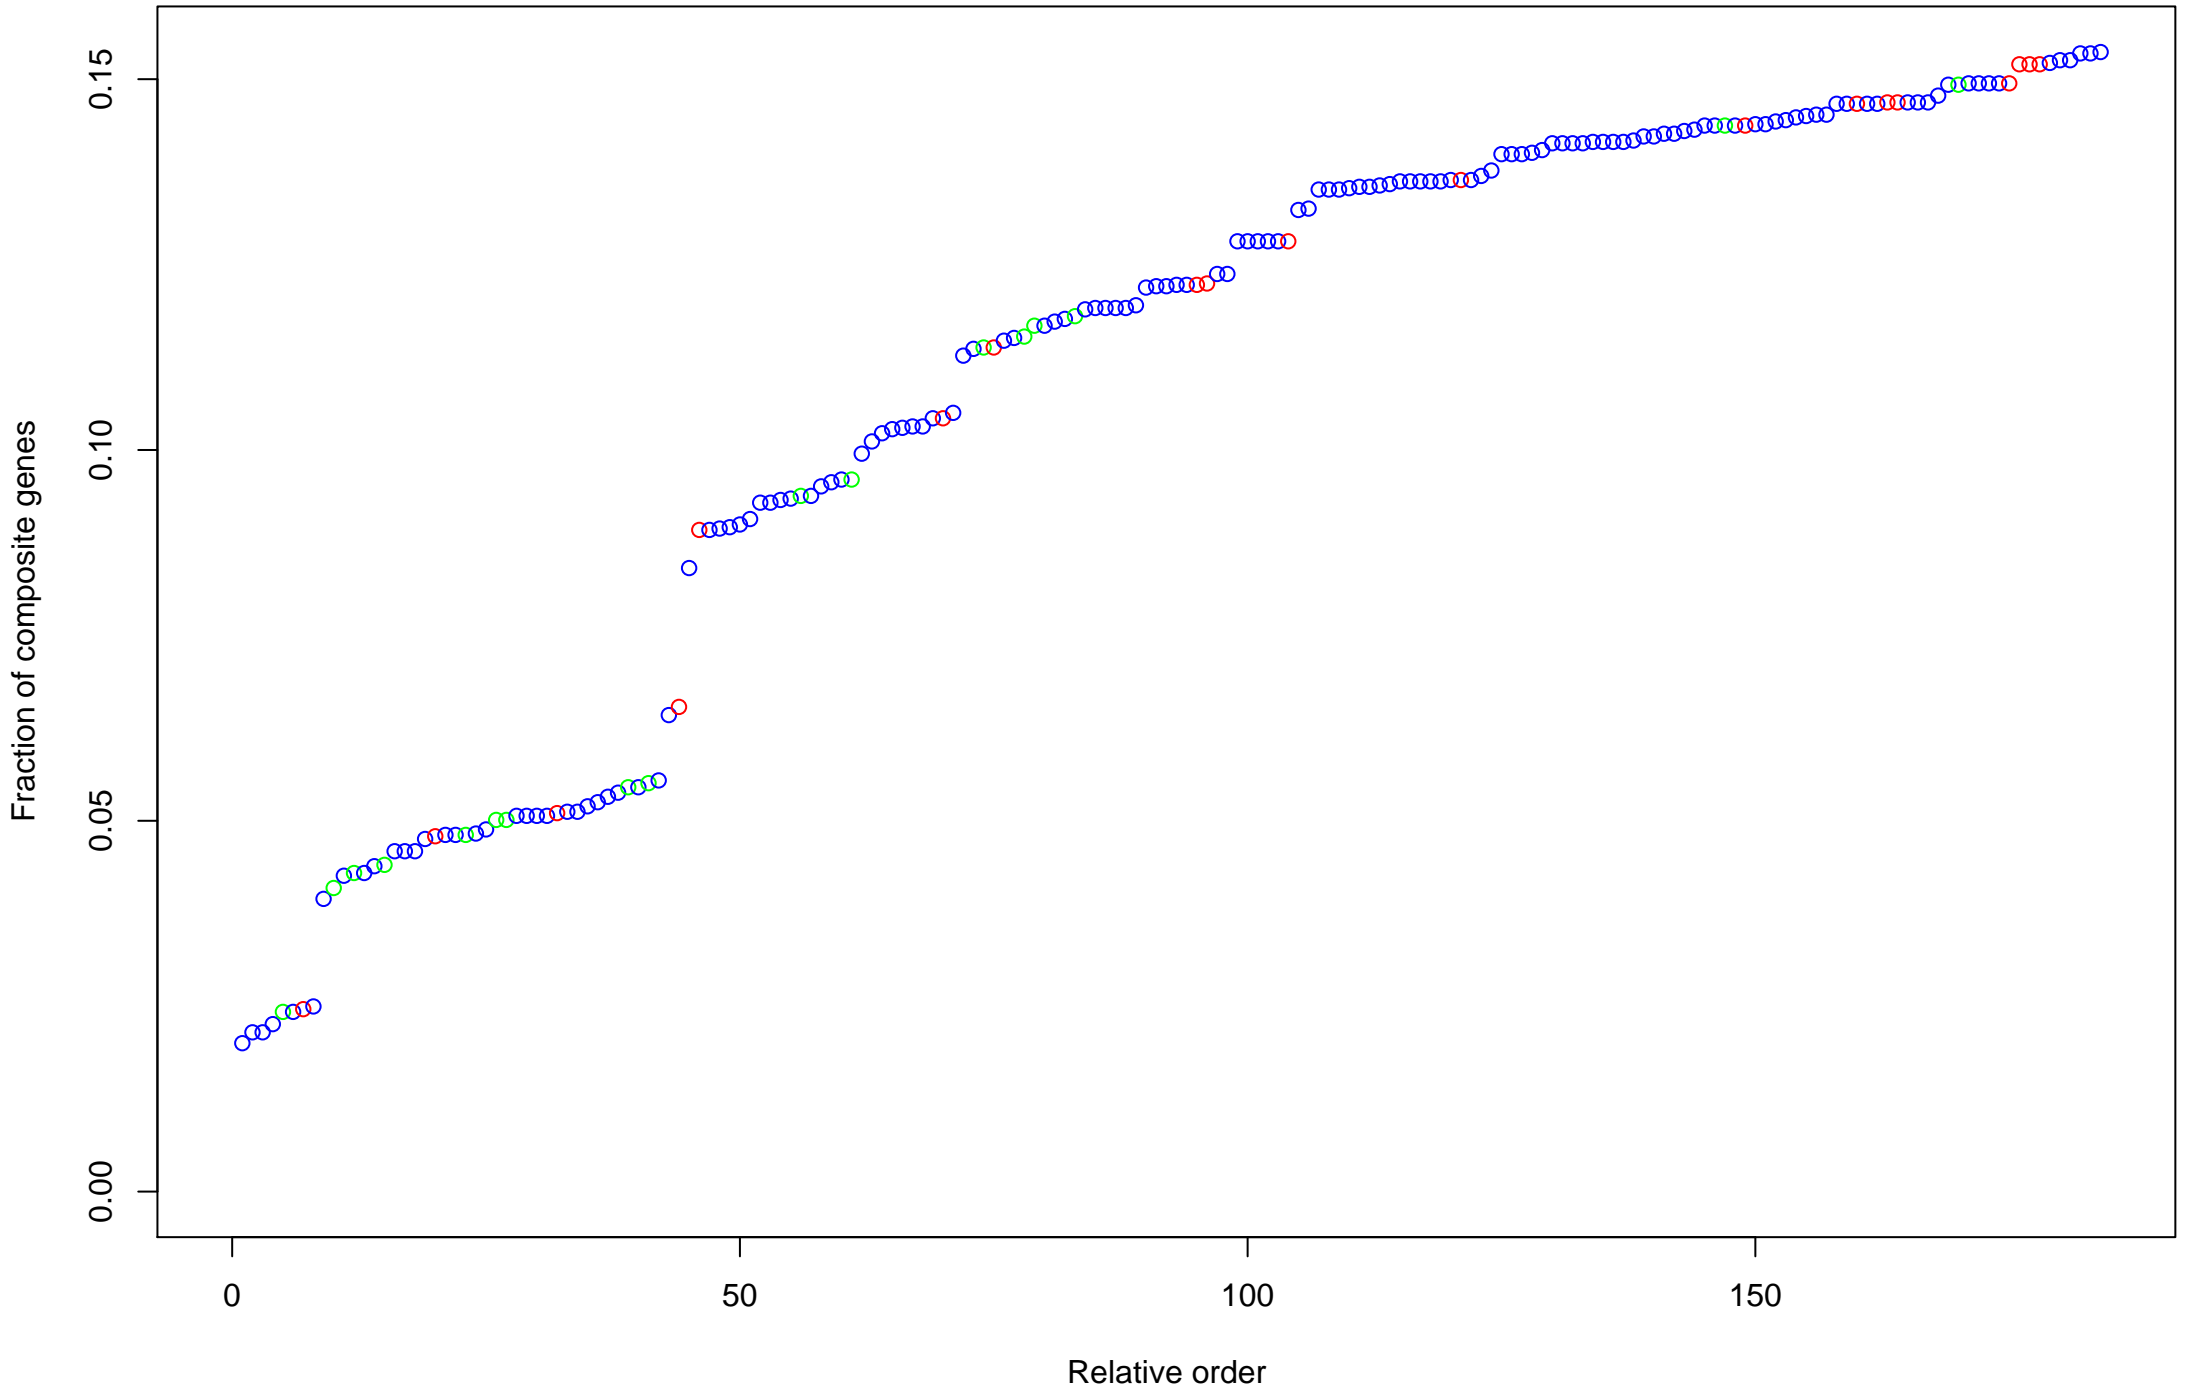

# PMUL-PM7-01 (*Pasteurella multocida*)

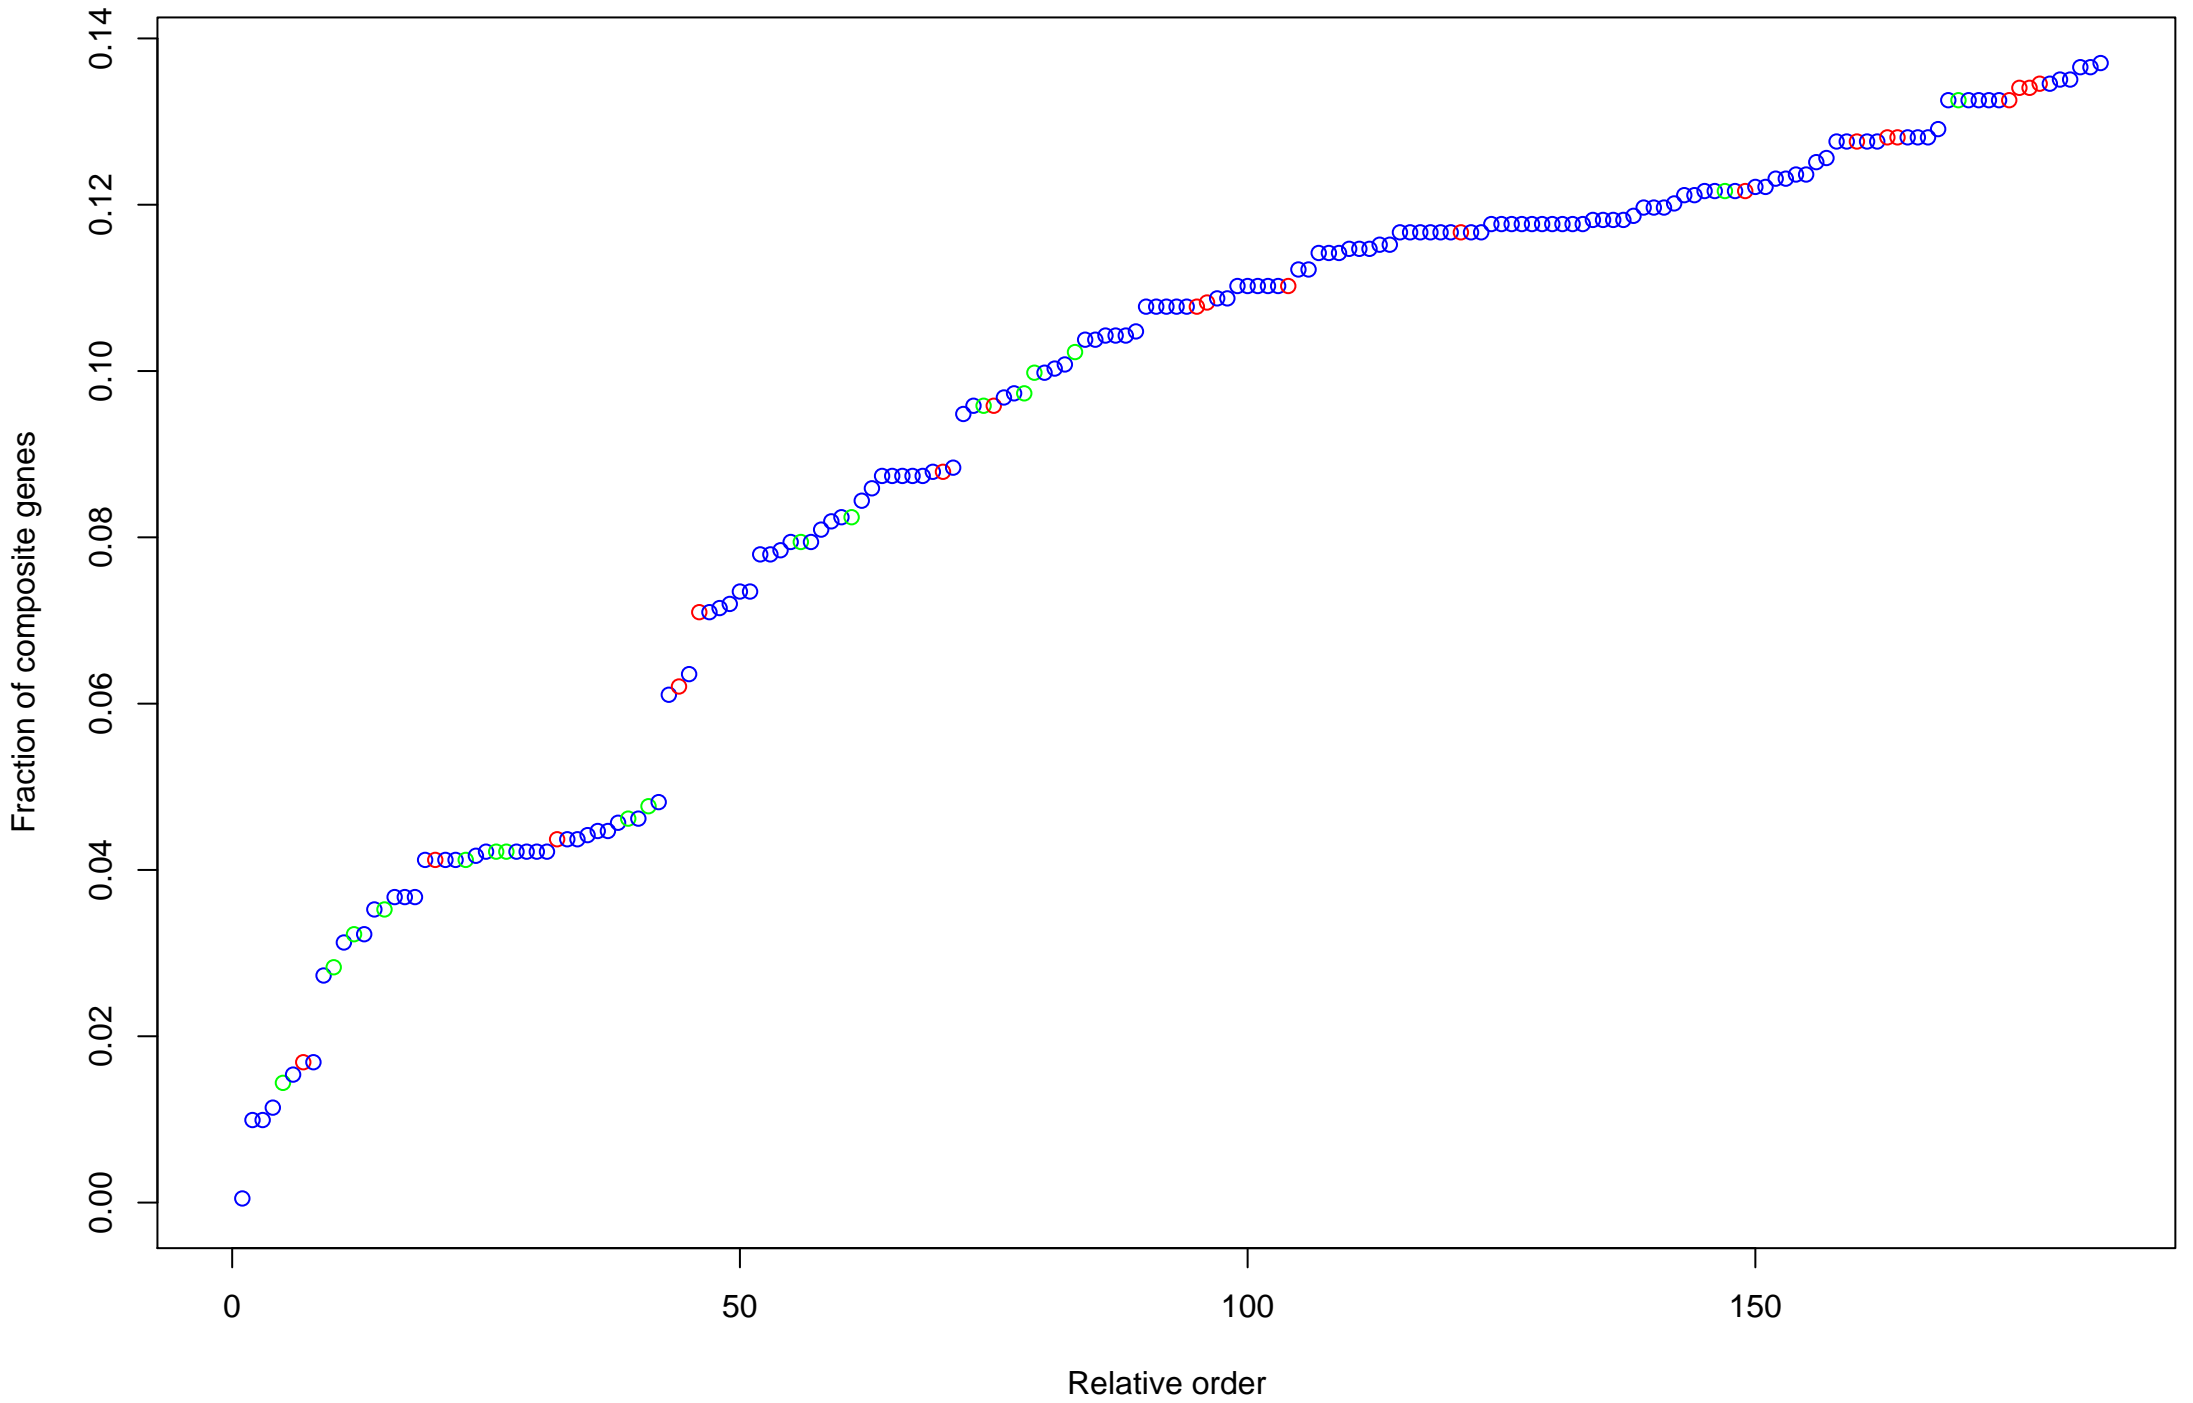



# CCRE-XXX-01 (*Caulobacter crescentus*)

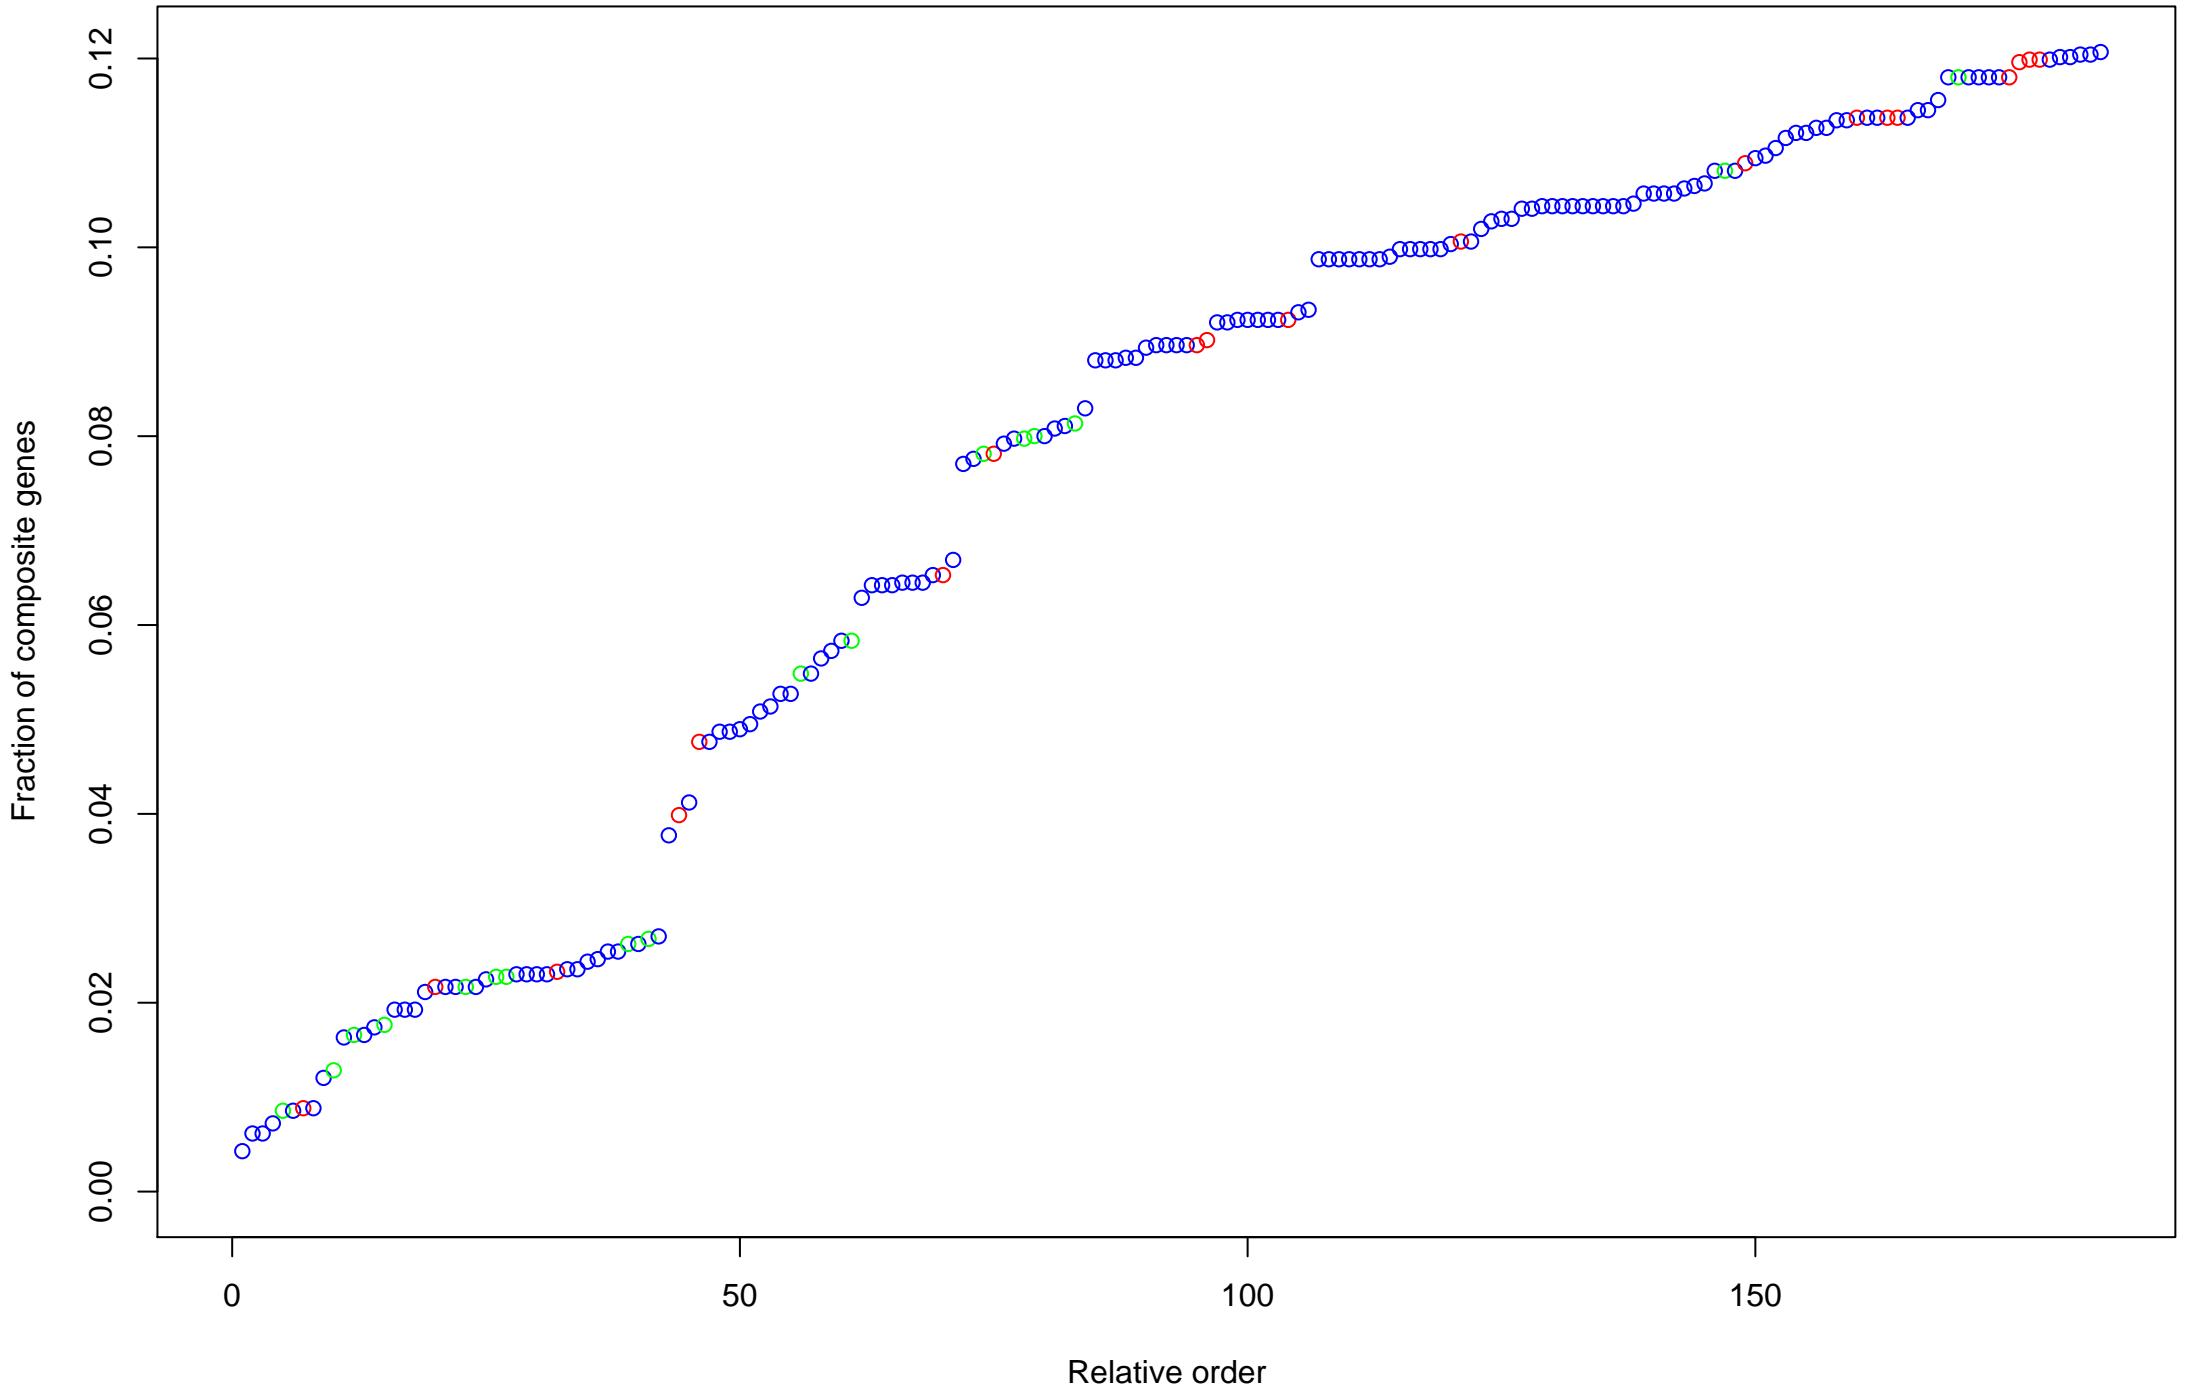

# SPYO-SF3-01 (Streptococcus pyogenes M1)

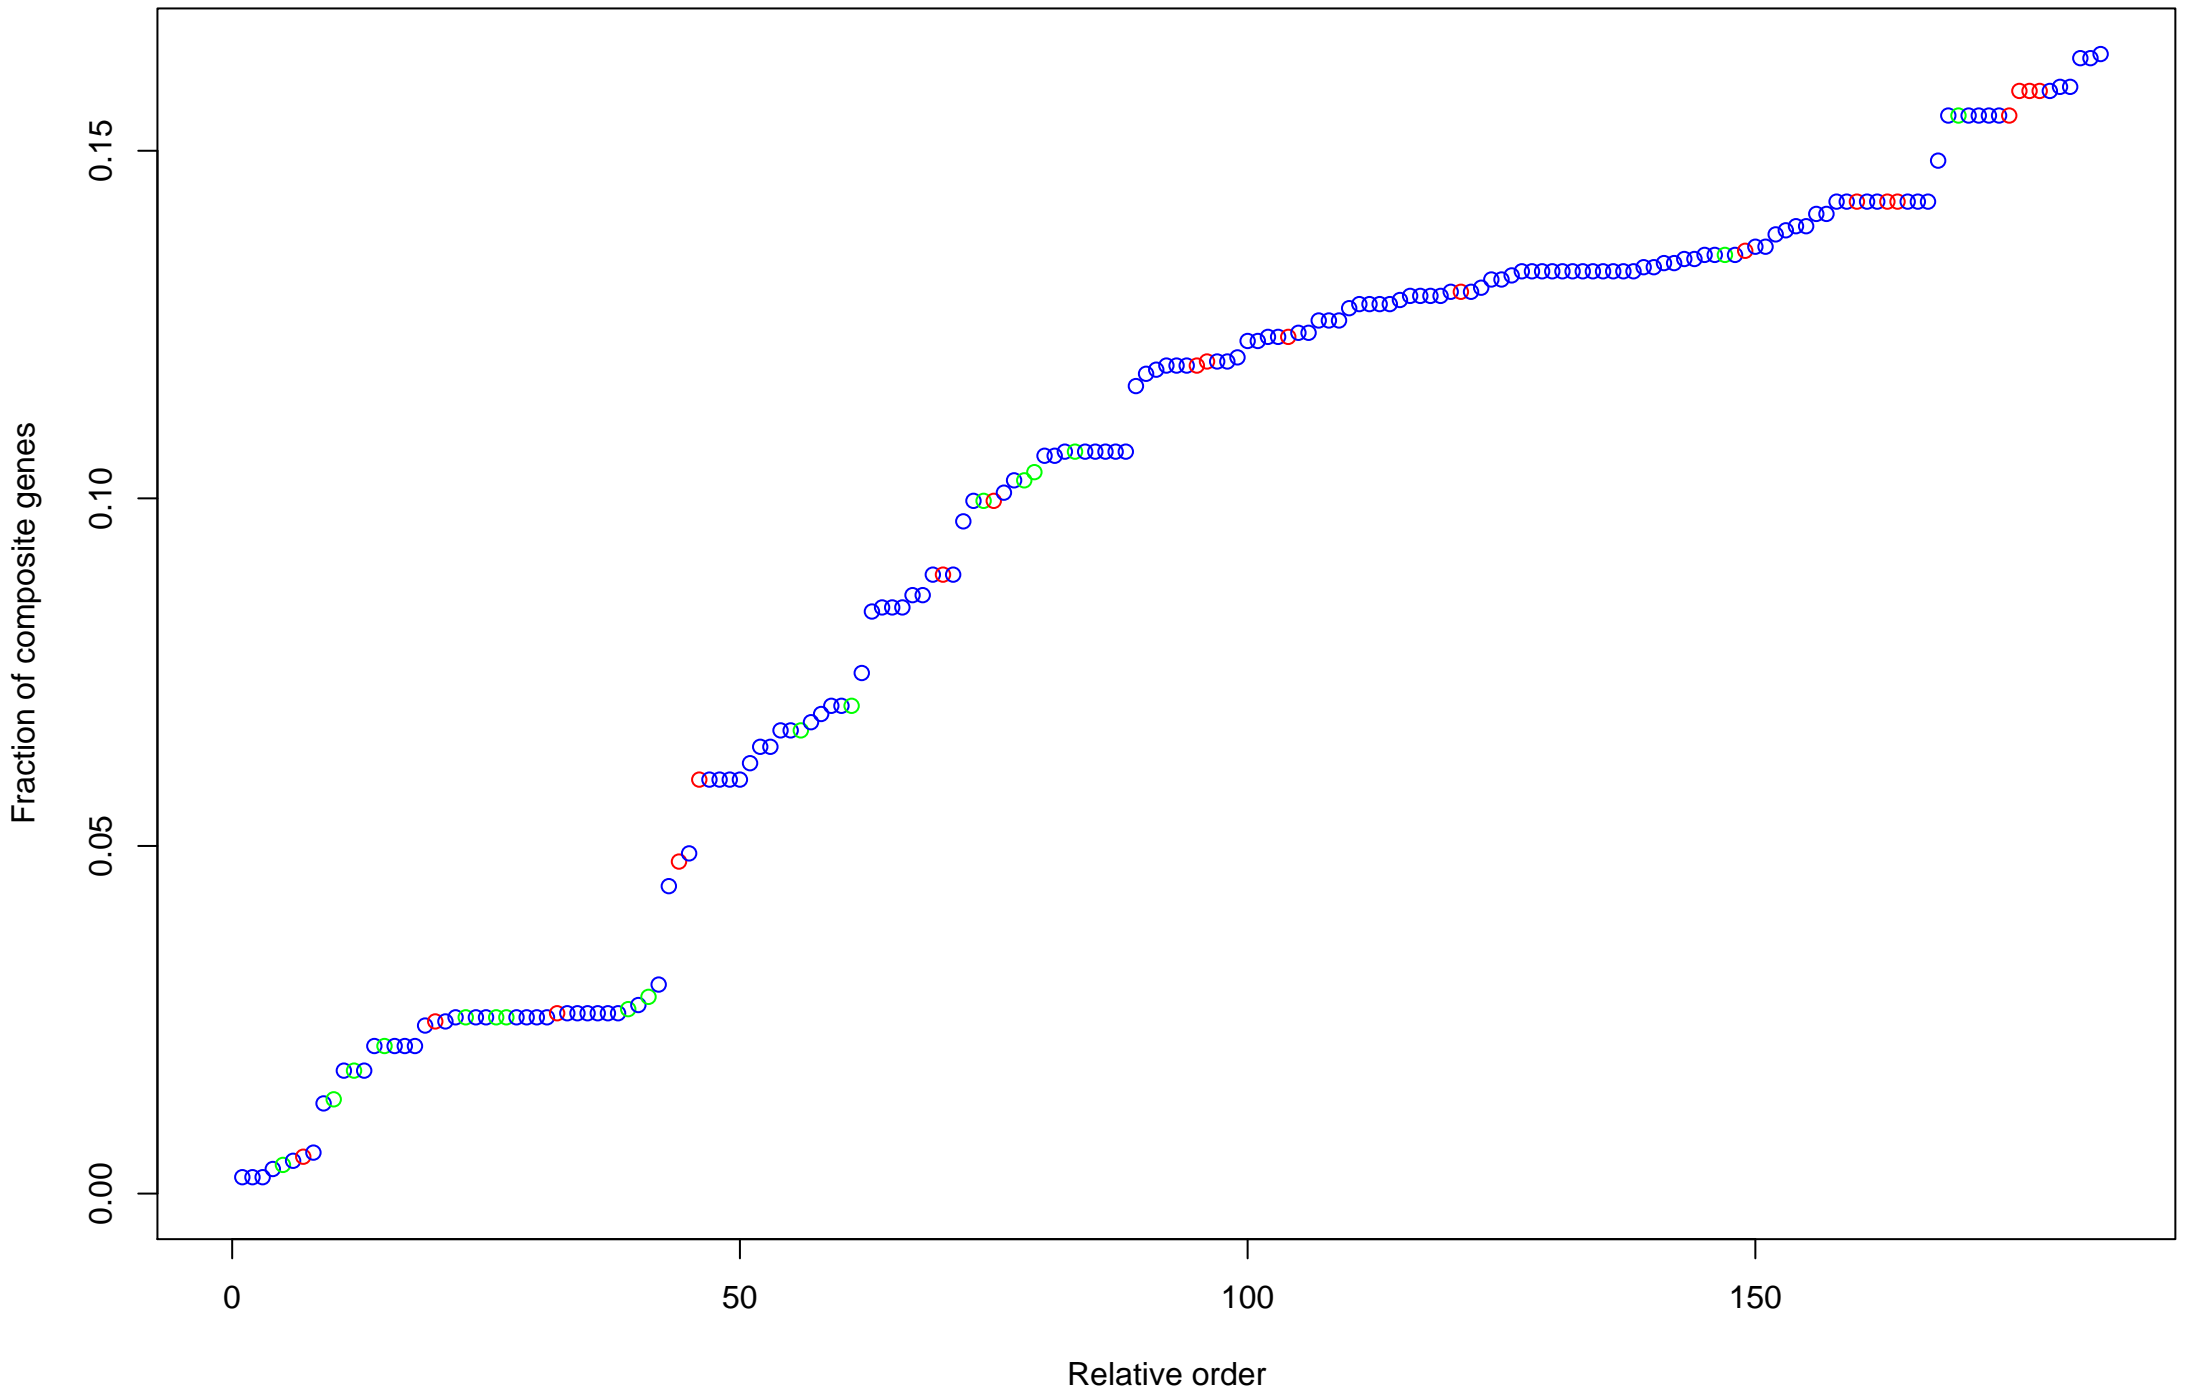

# SAUR-N13-01 (Staphylococcus aureus MRSA)

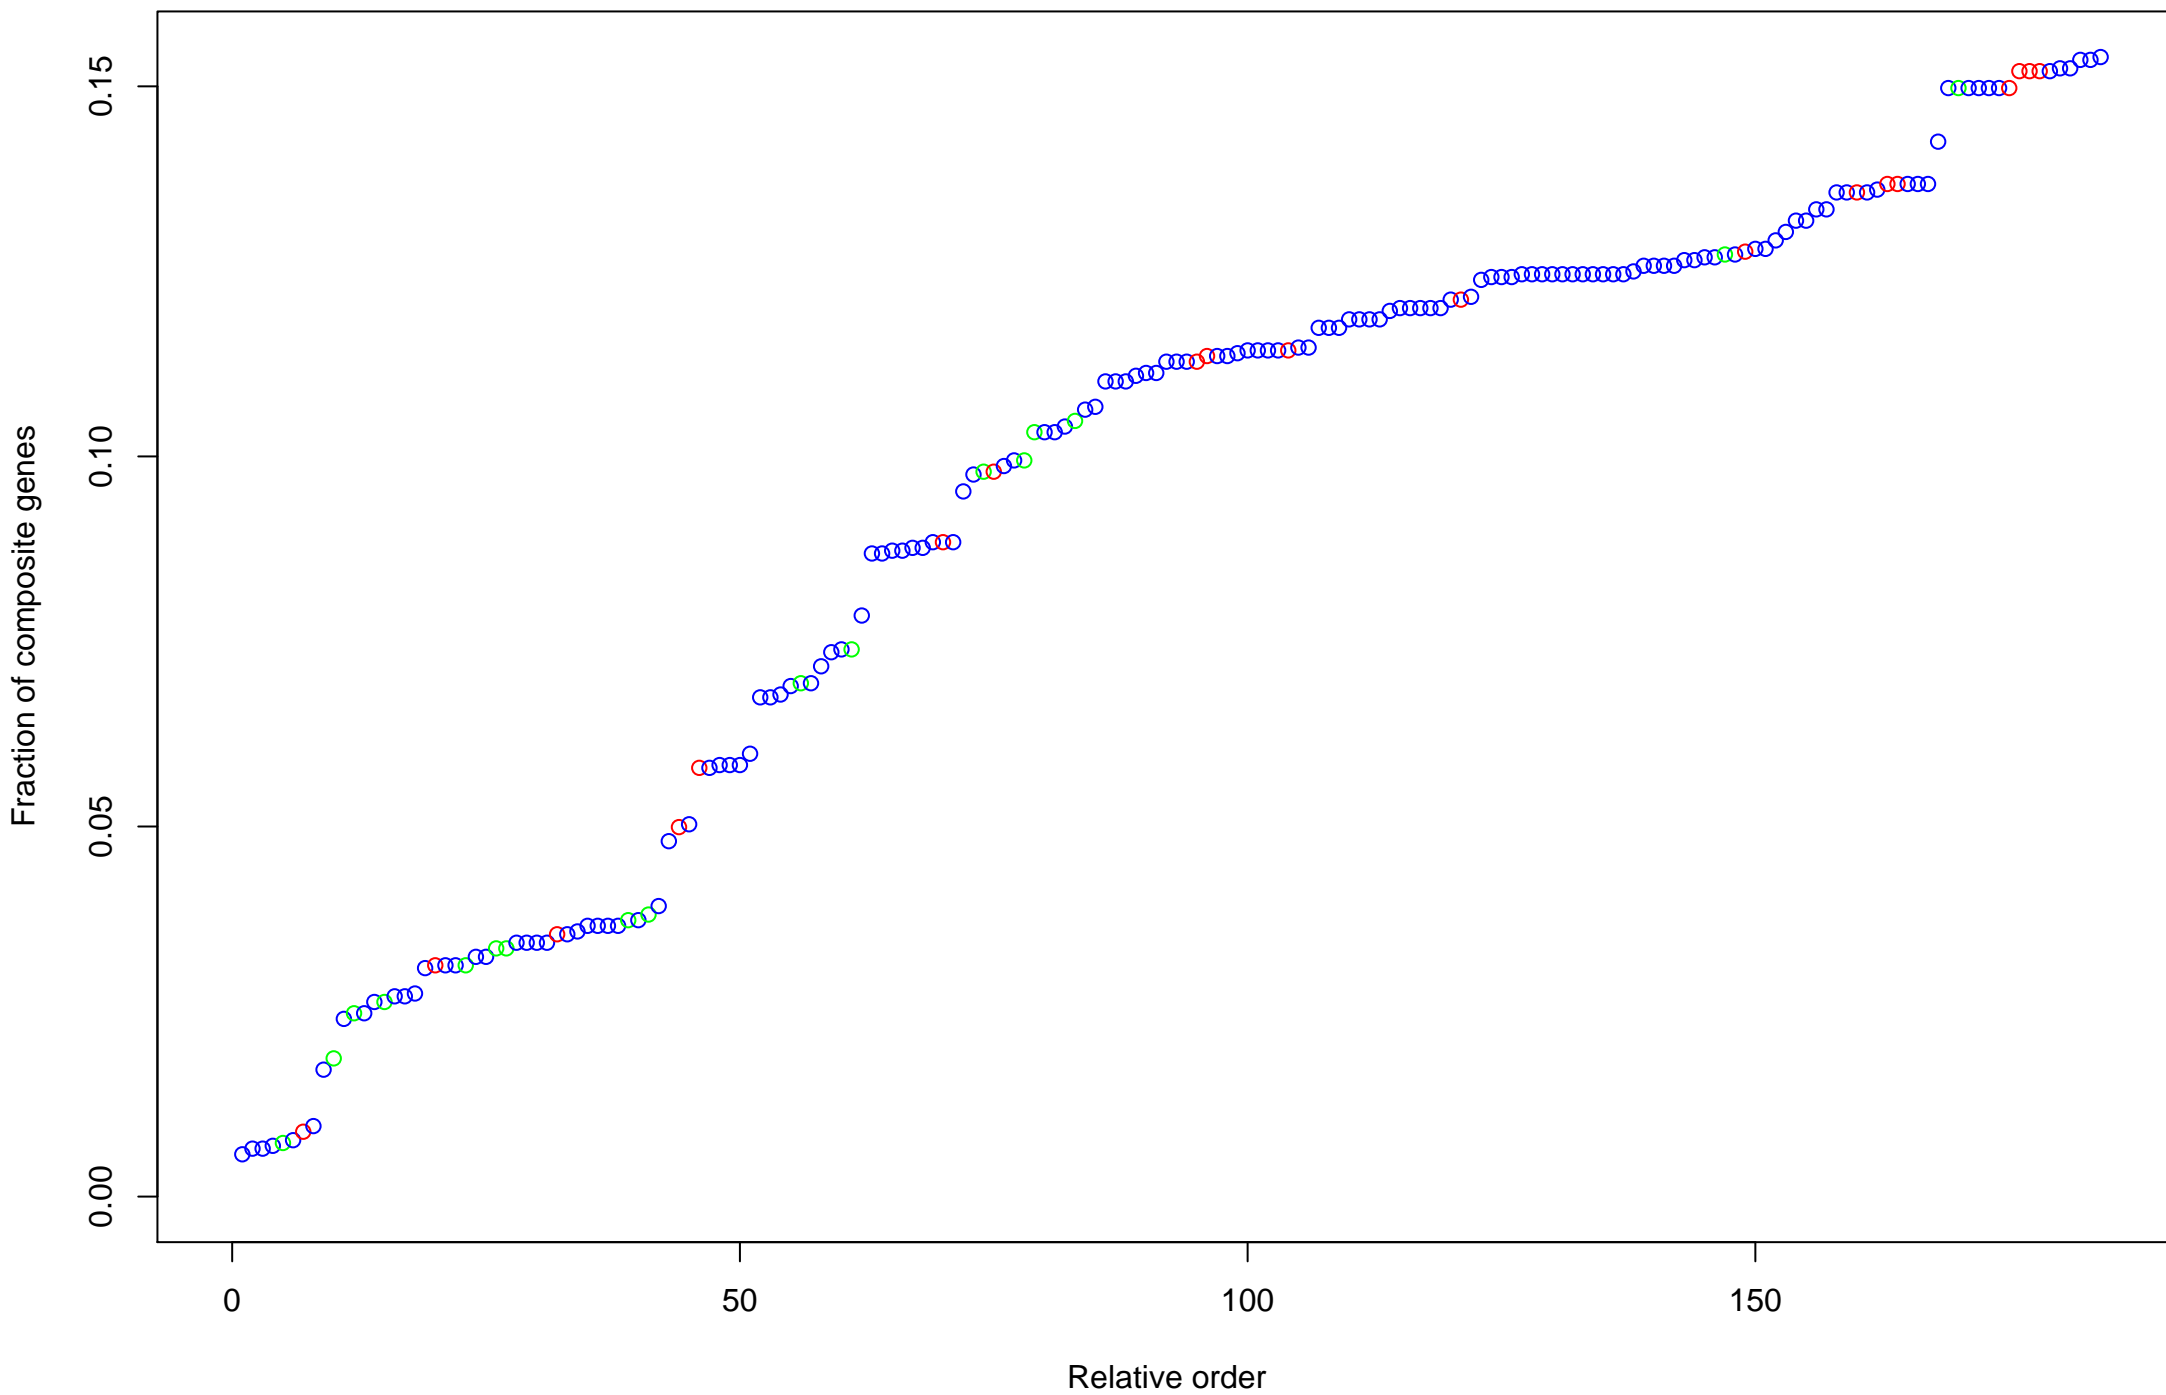

# SAUR-MU5-01 (Staphylococcus aureus VRSA)

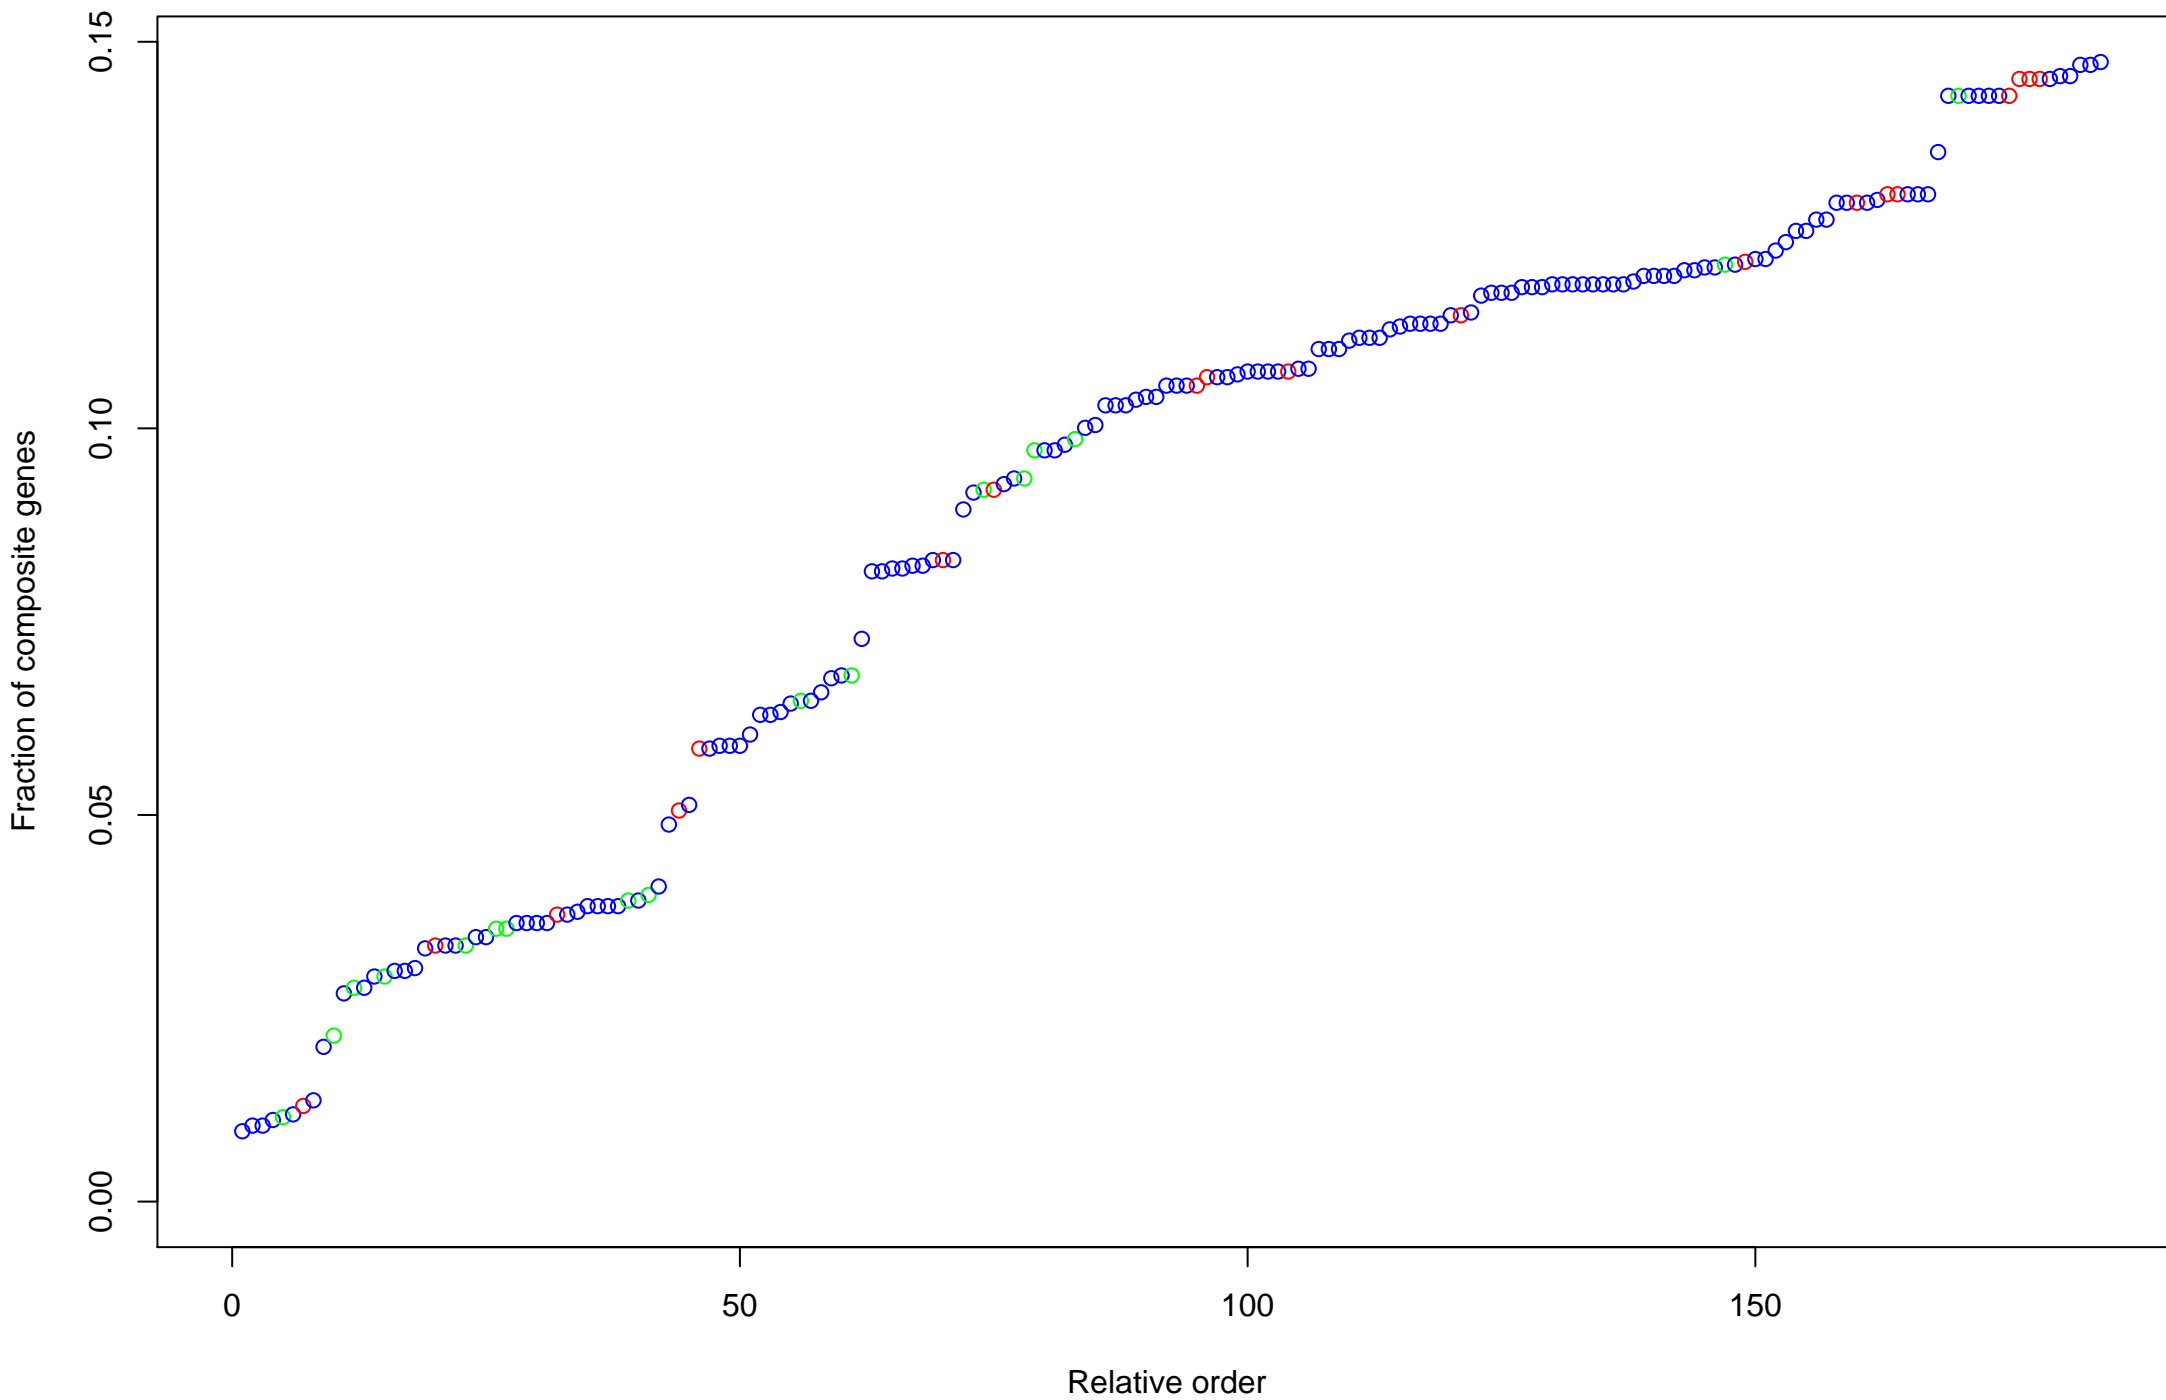

# MTUB-CDC-01 (*Mycobacterium tuberculosis*)

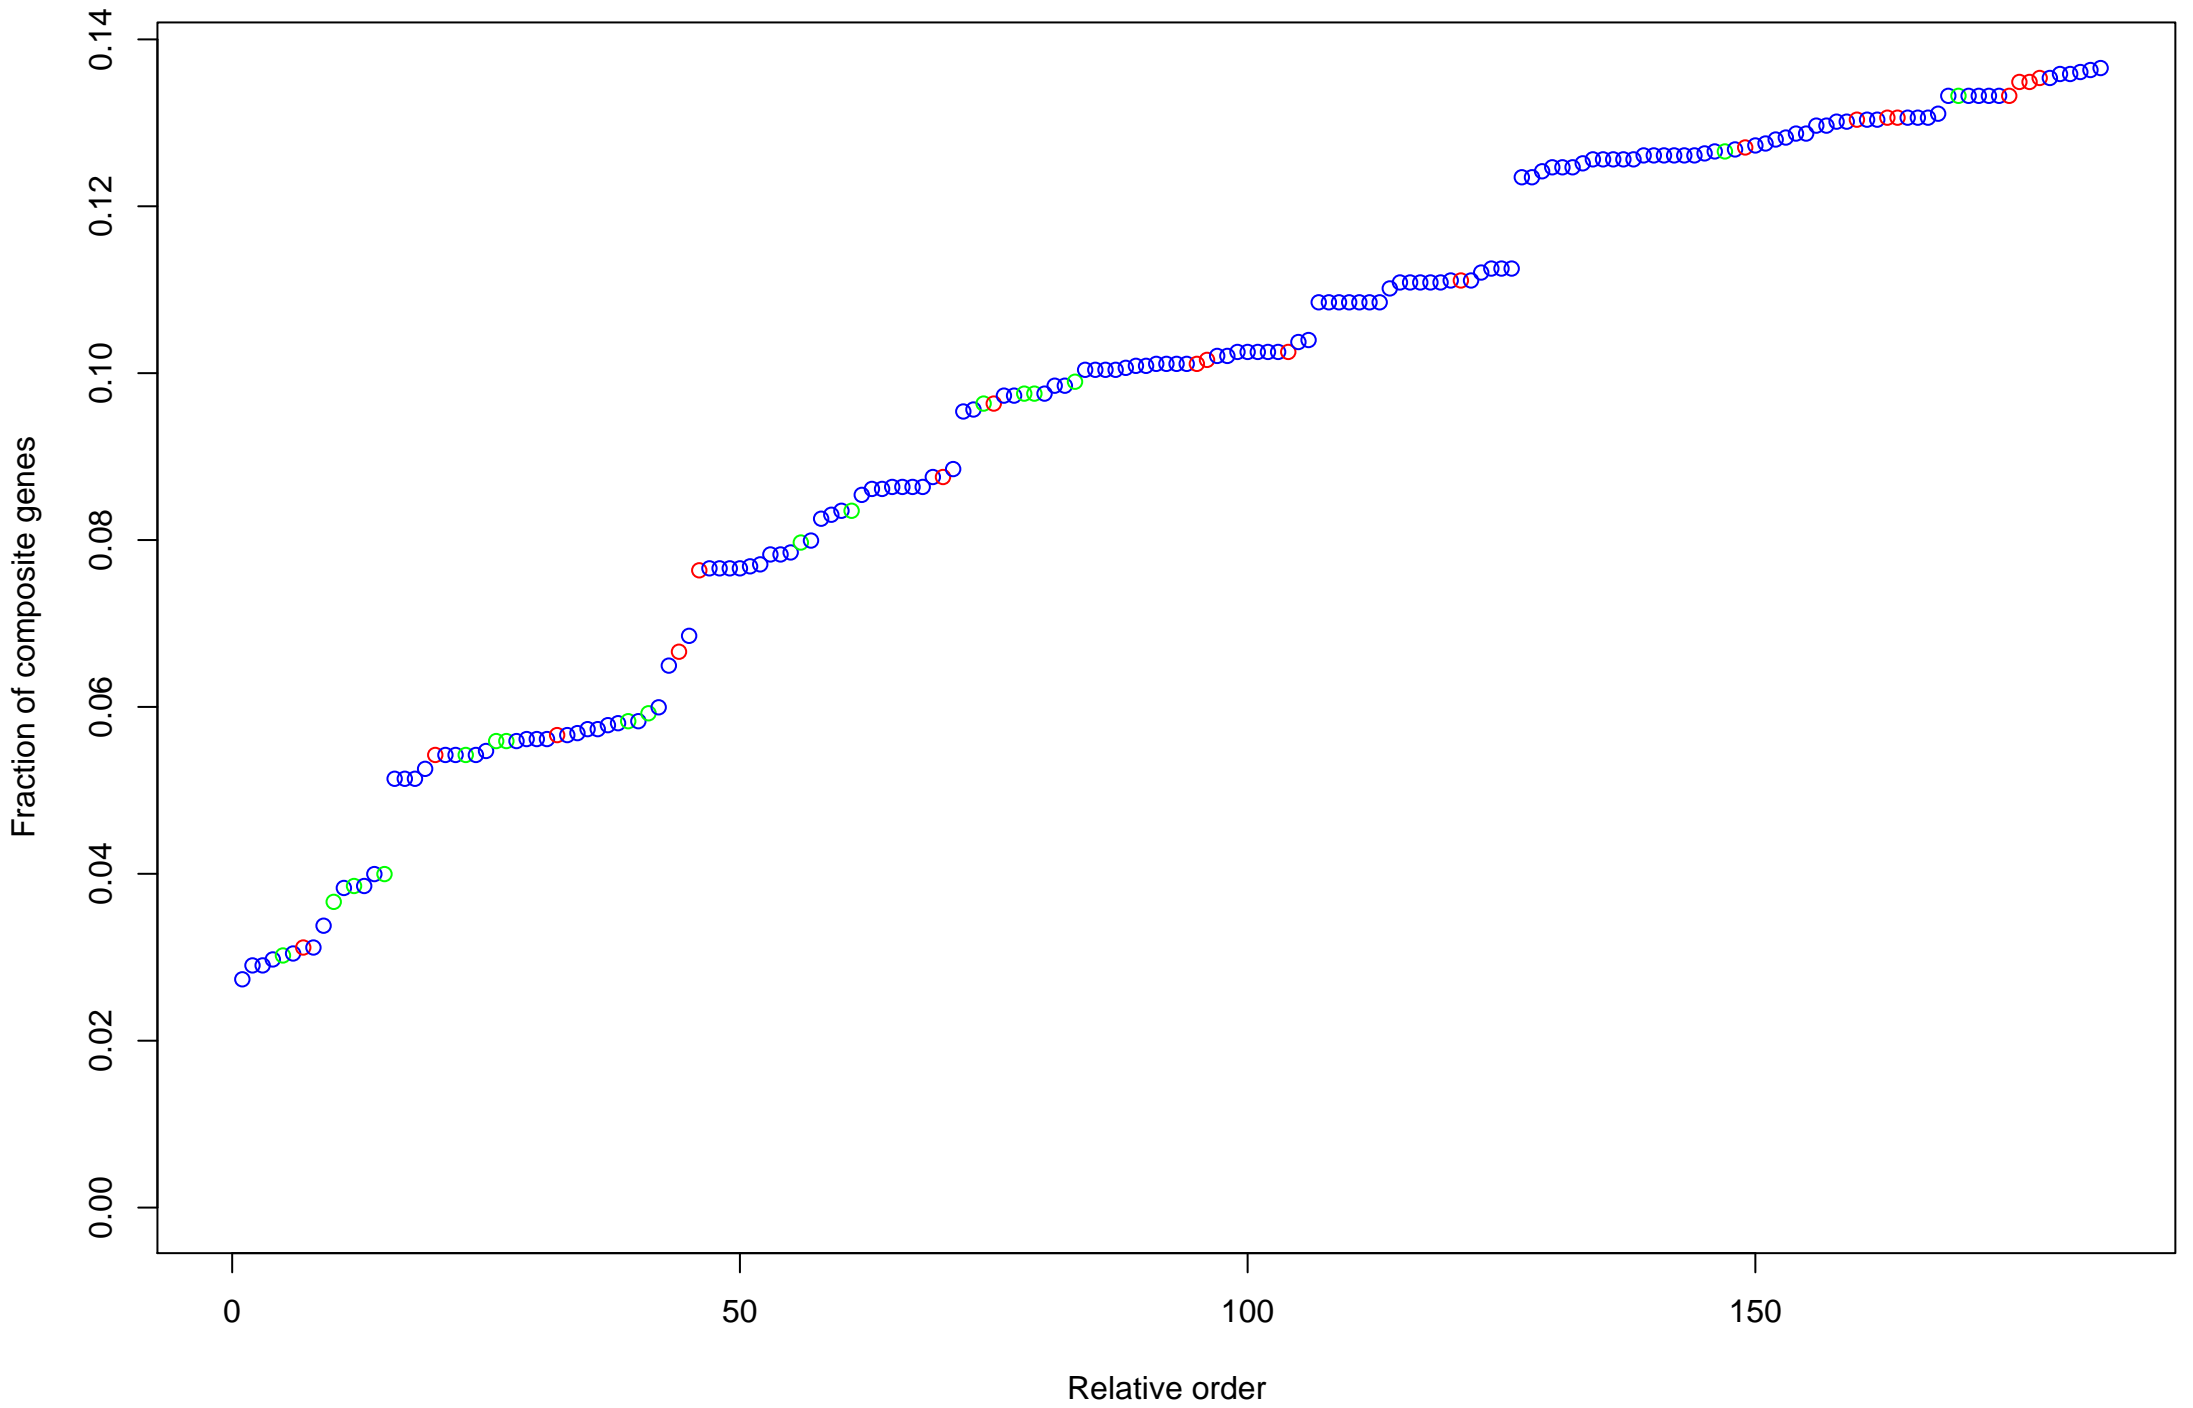

# LLAC-IL1-01 (*Lactococcus lactis*)

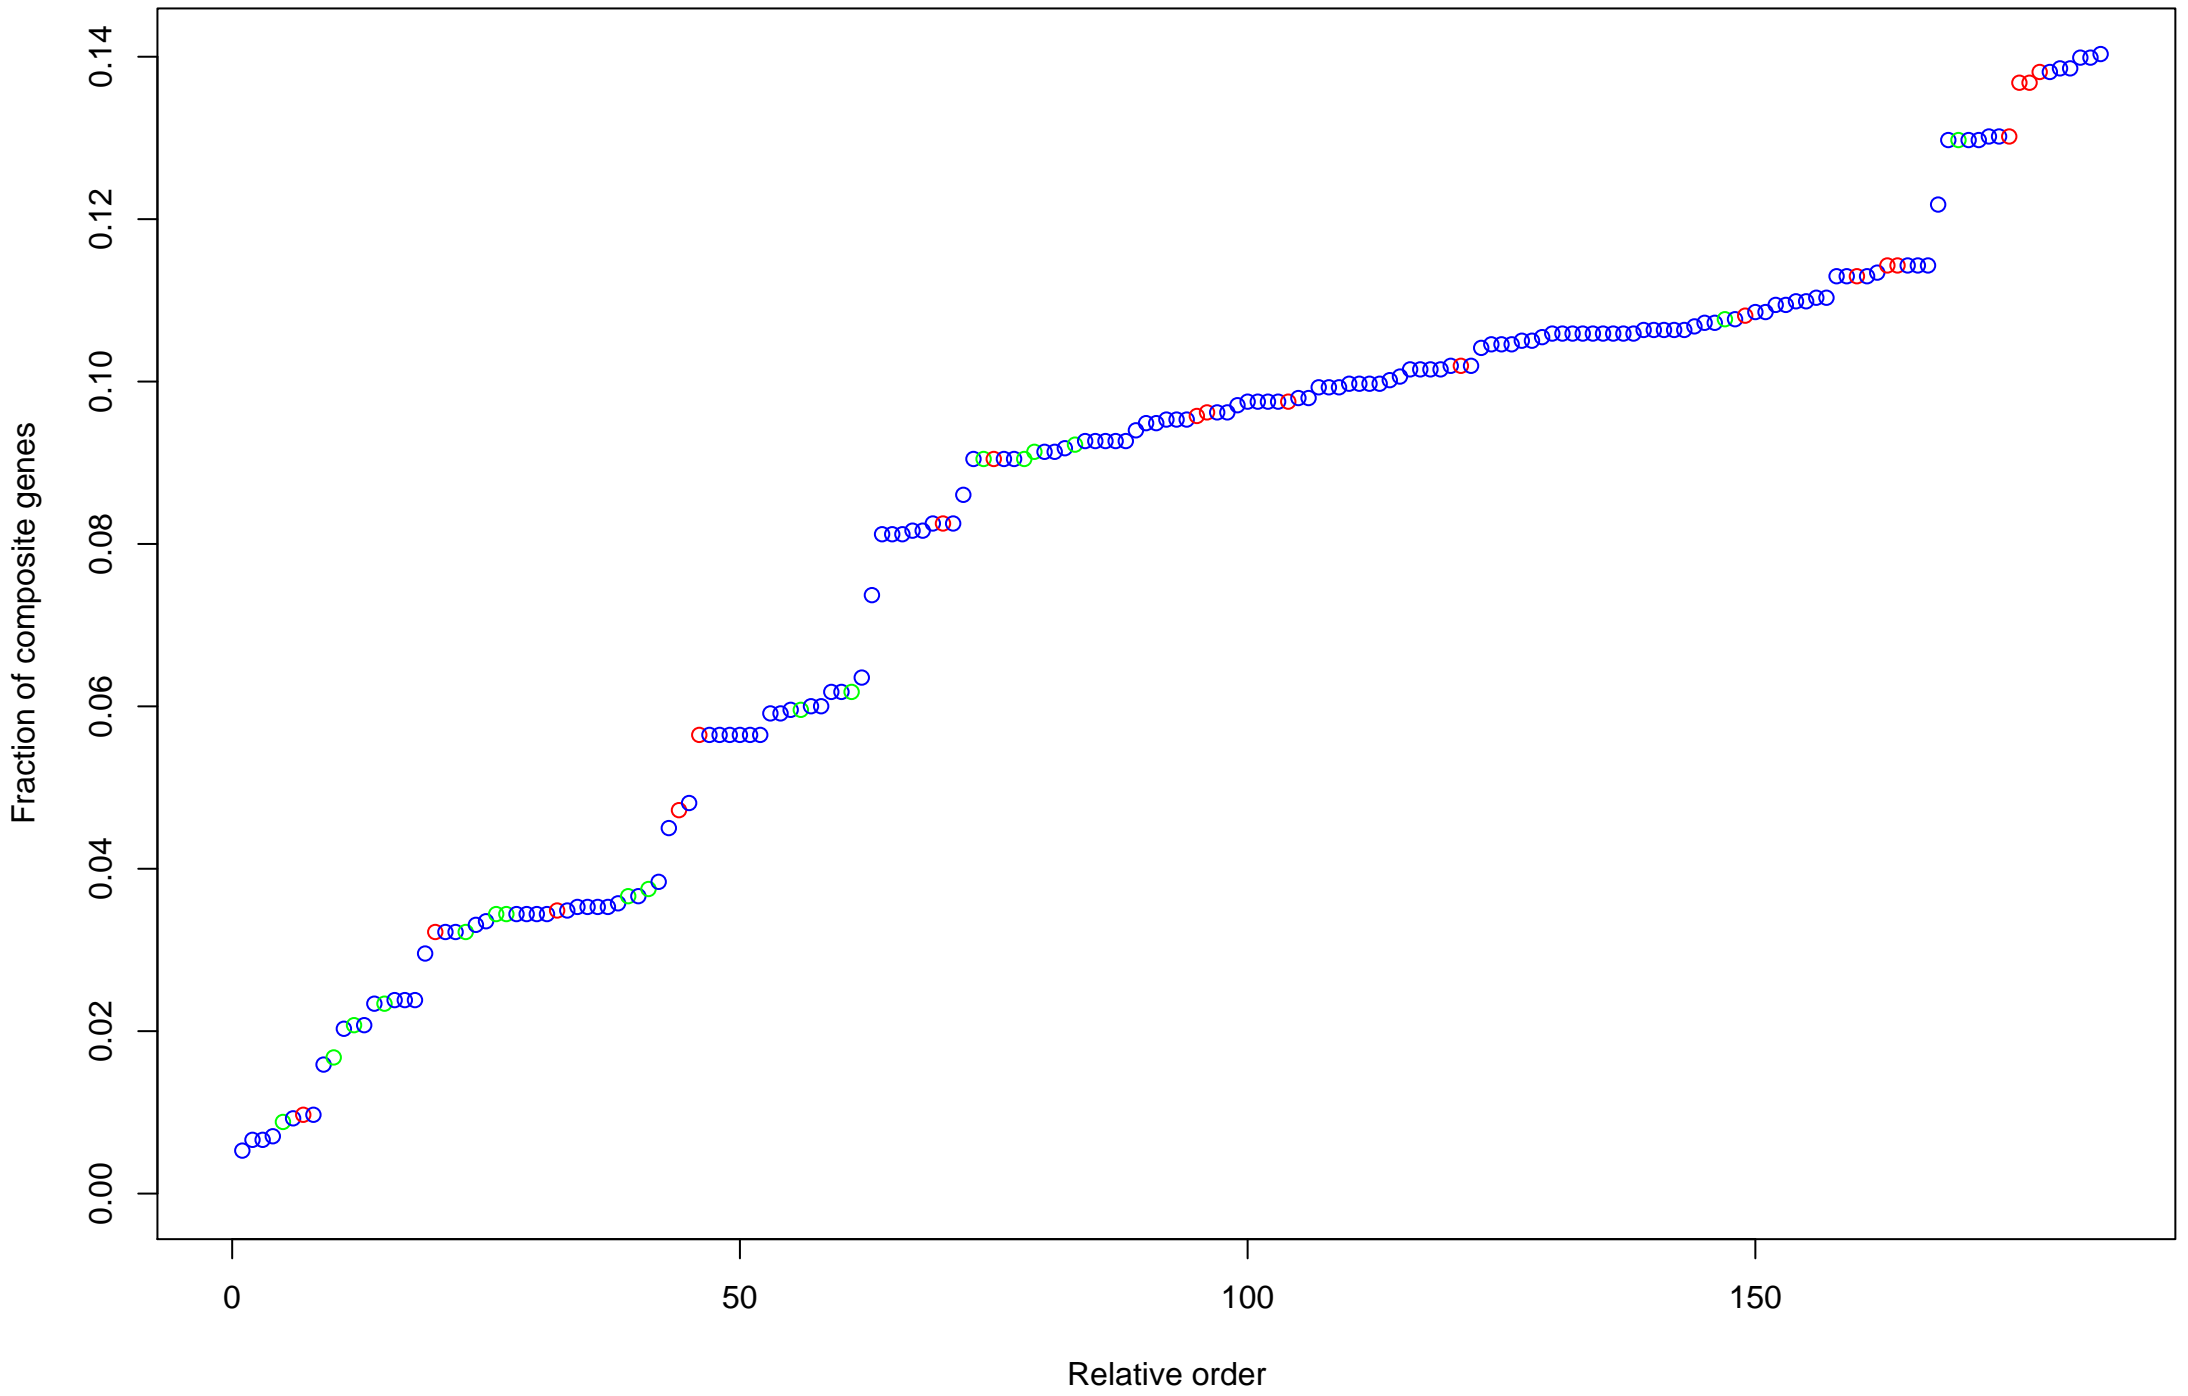

# MPUL-UAB-01 (*Mycoplasma pulmonis*)

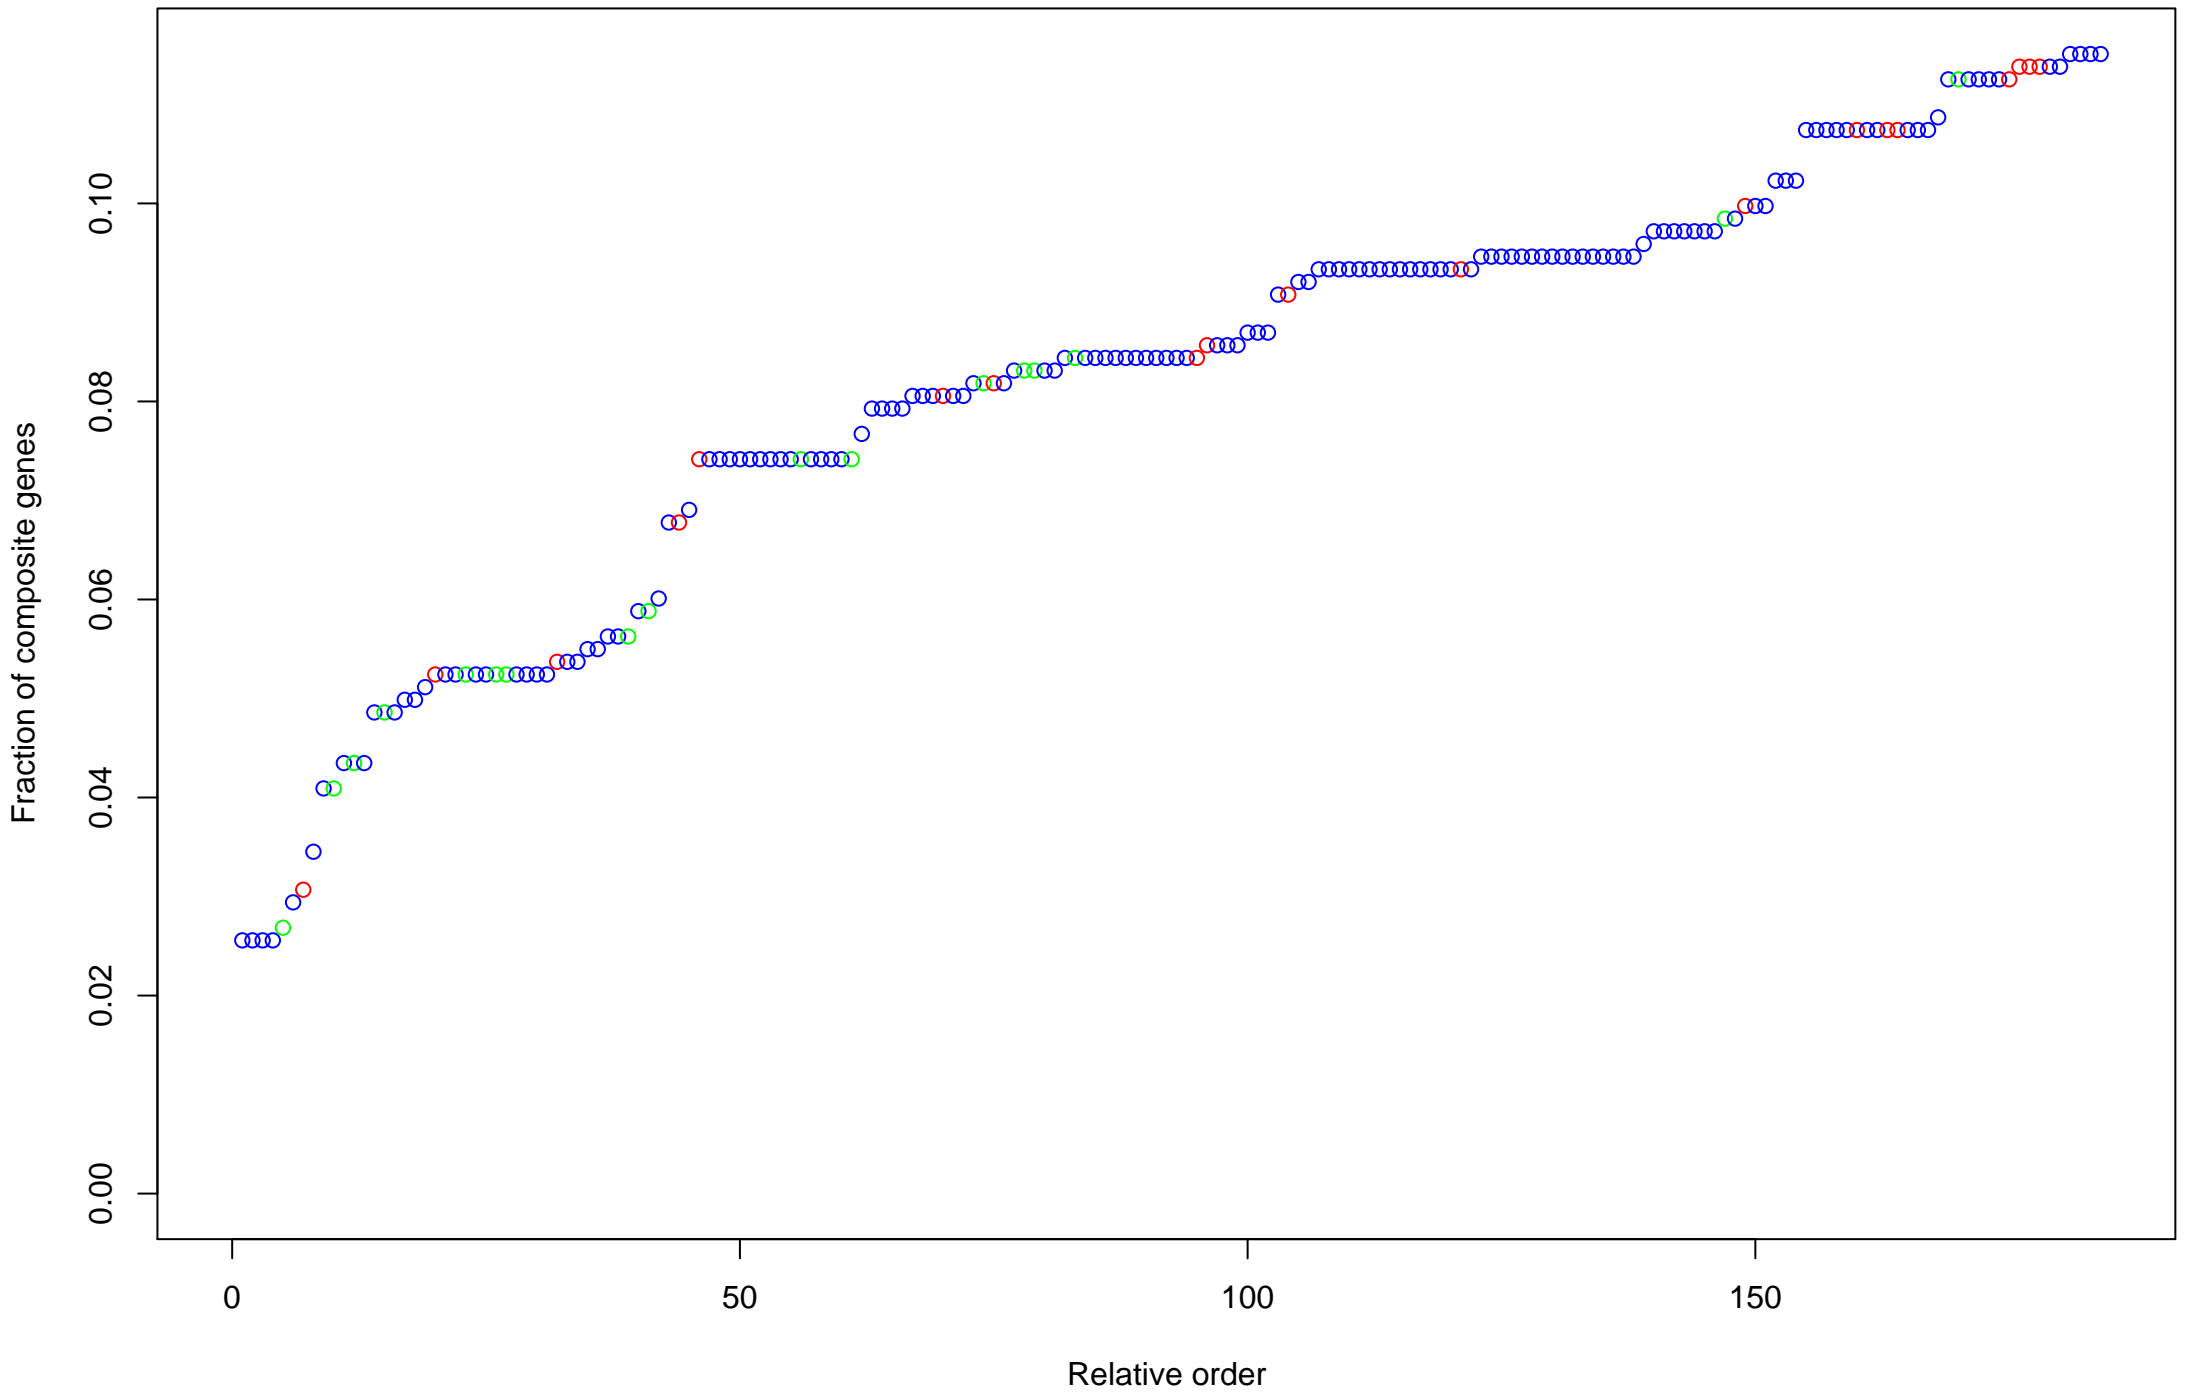

# SSOL-XP2-01 (*Sulfolobus solfataricus*)

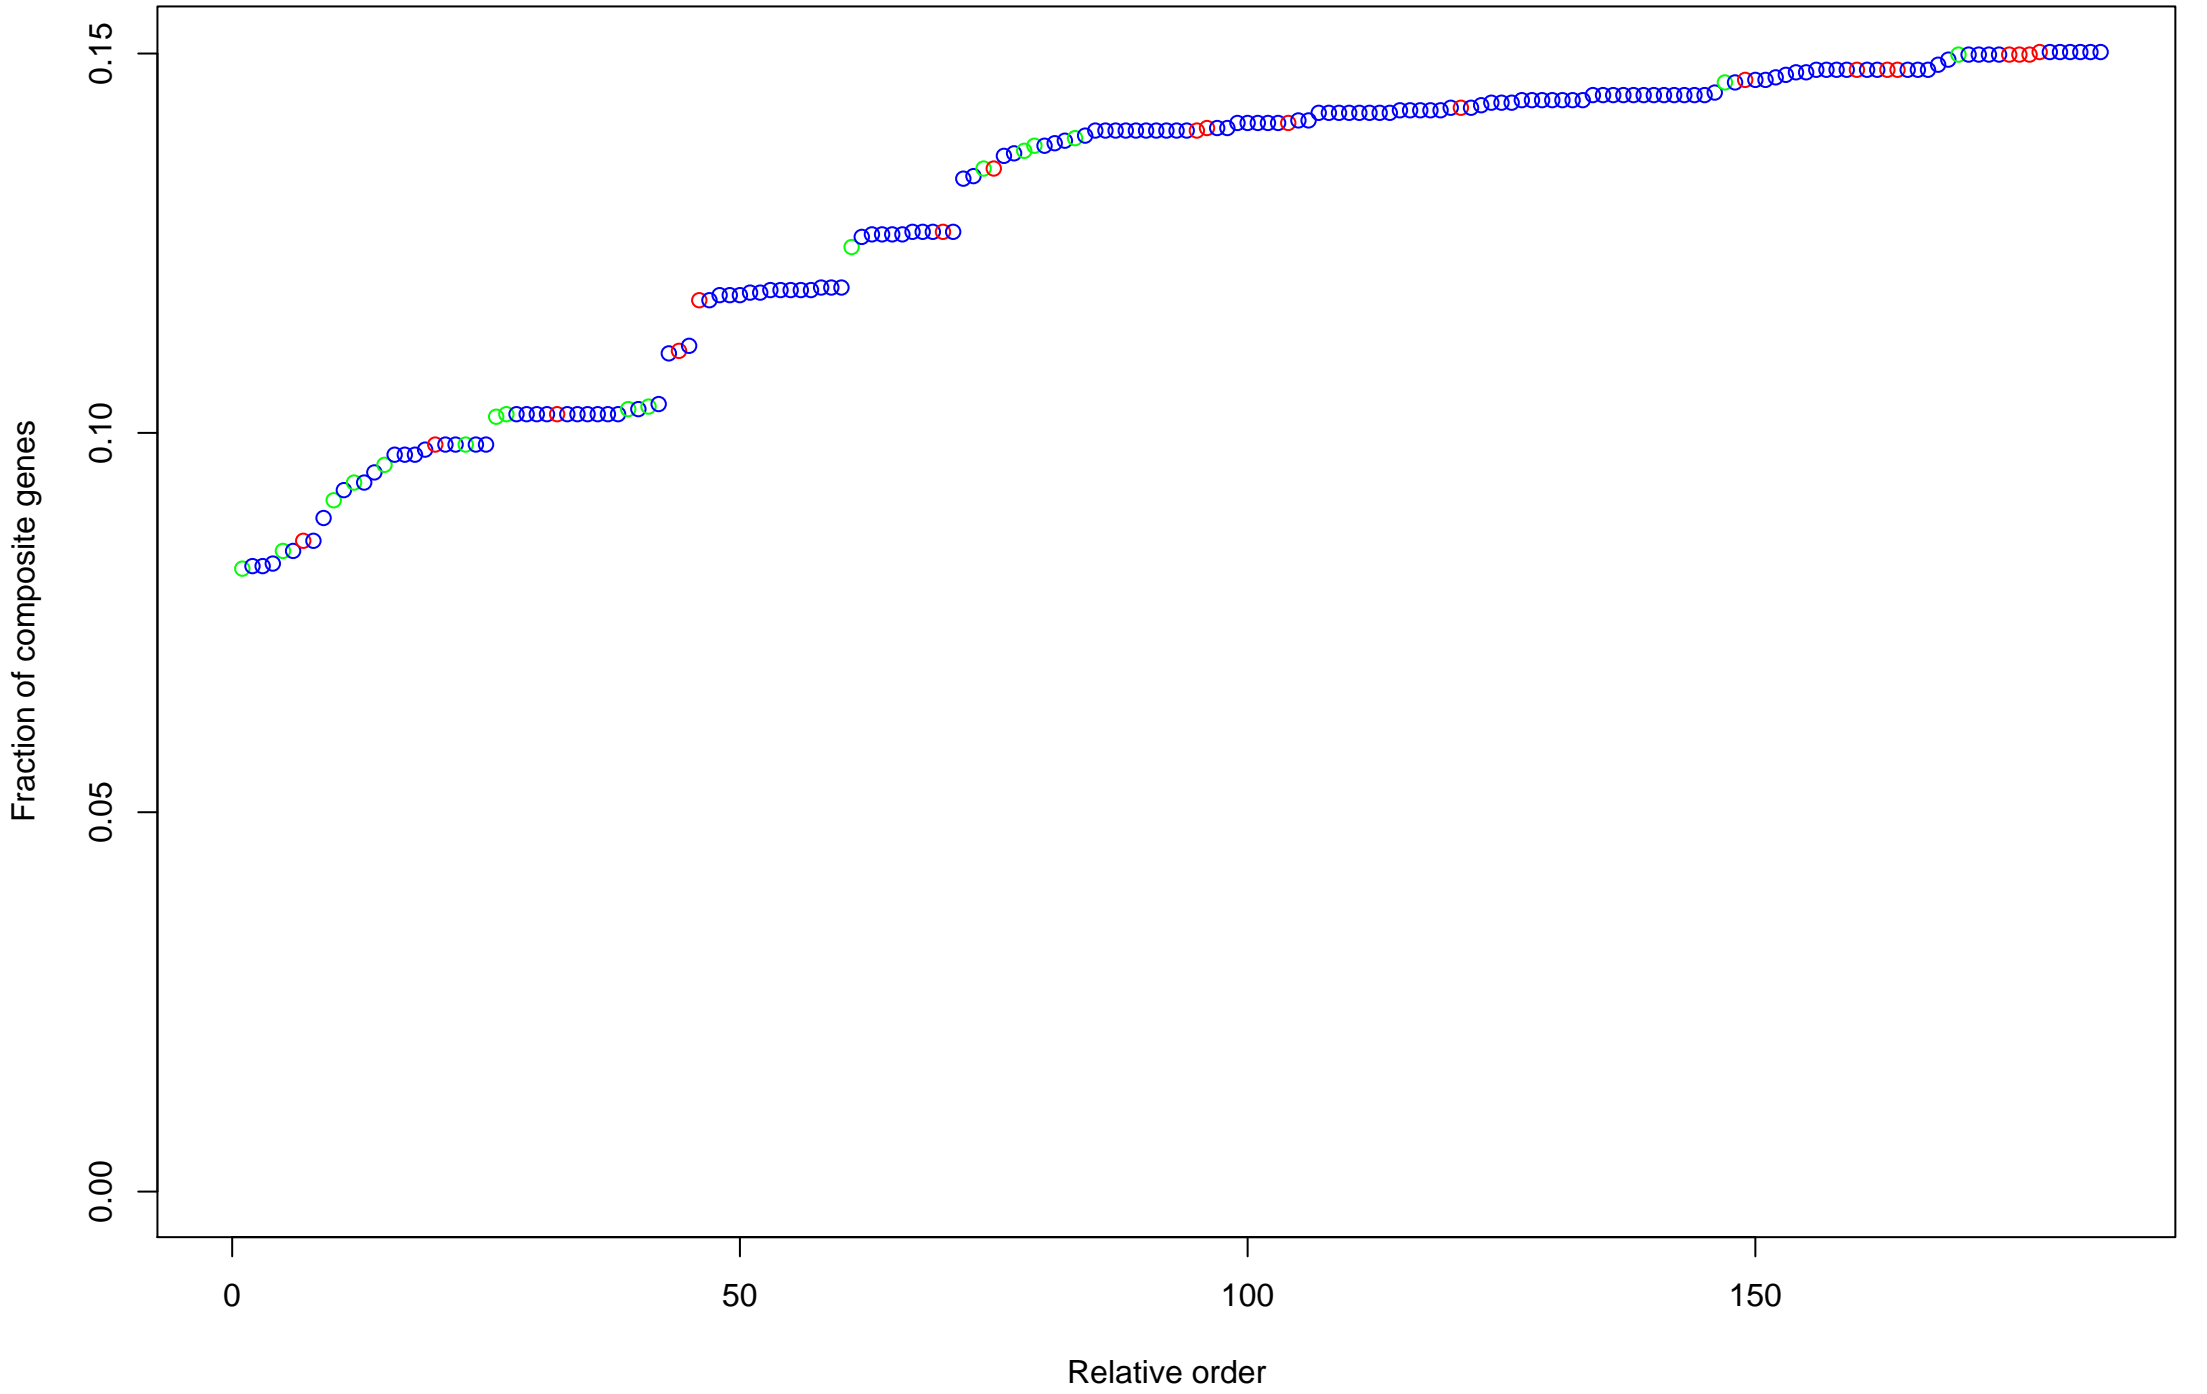



# SPNE-TIG-01 (*Streptococcus pneumoniae*)

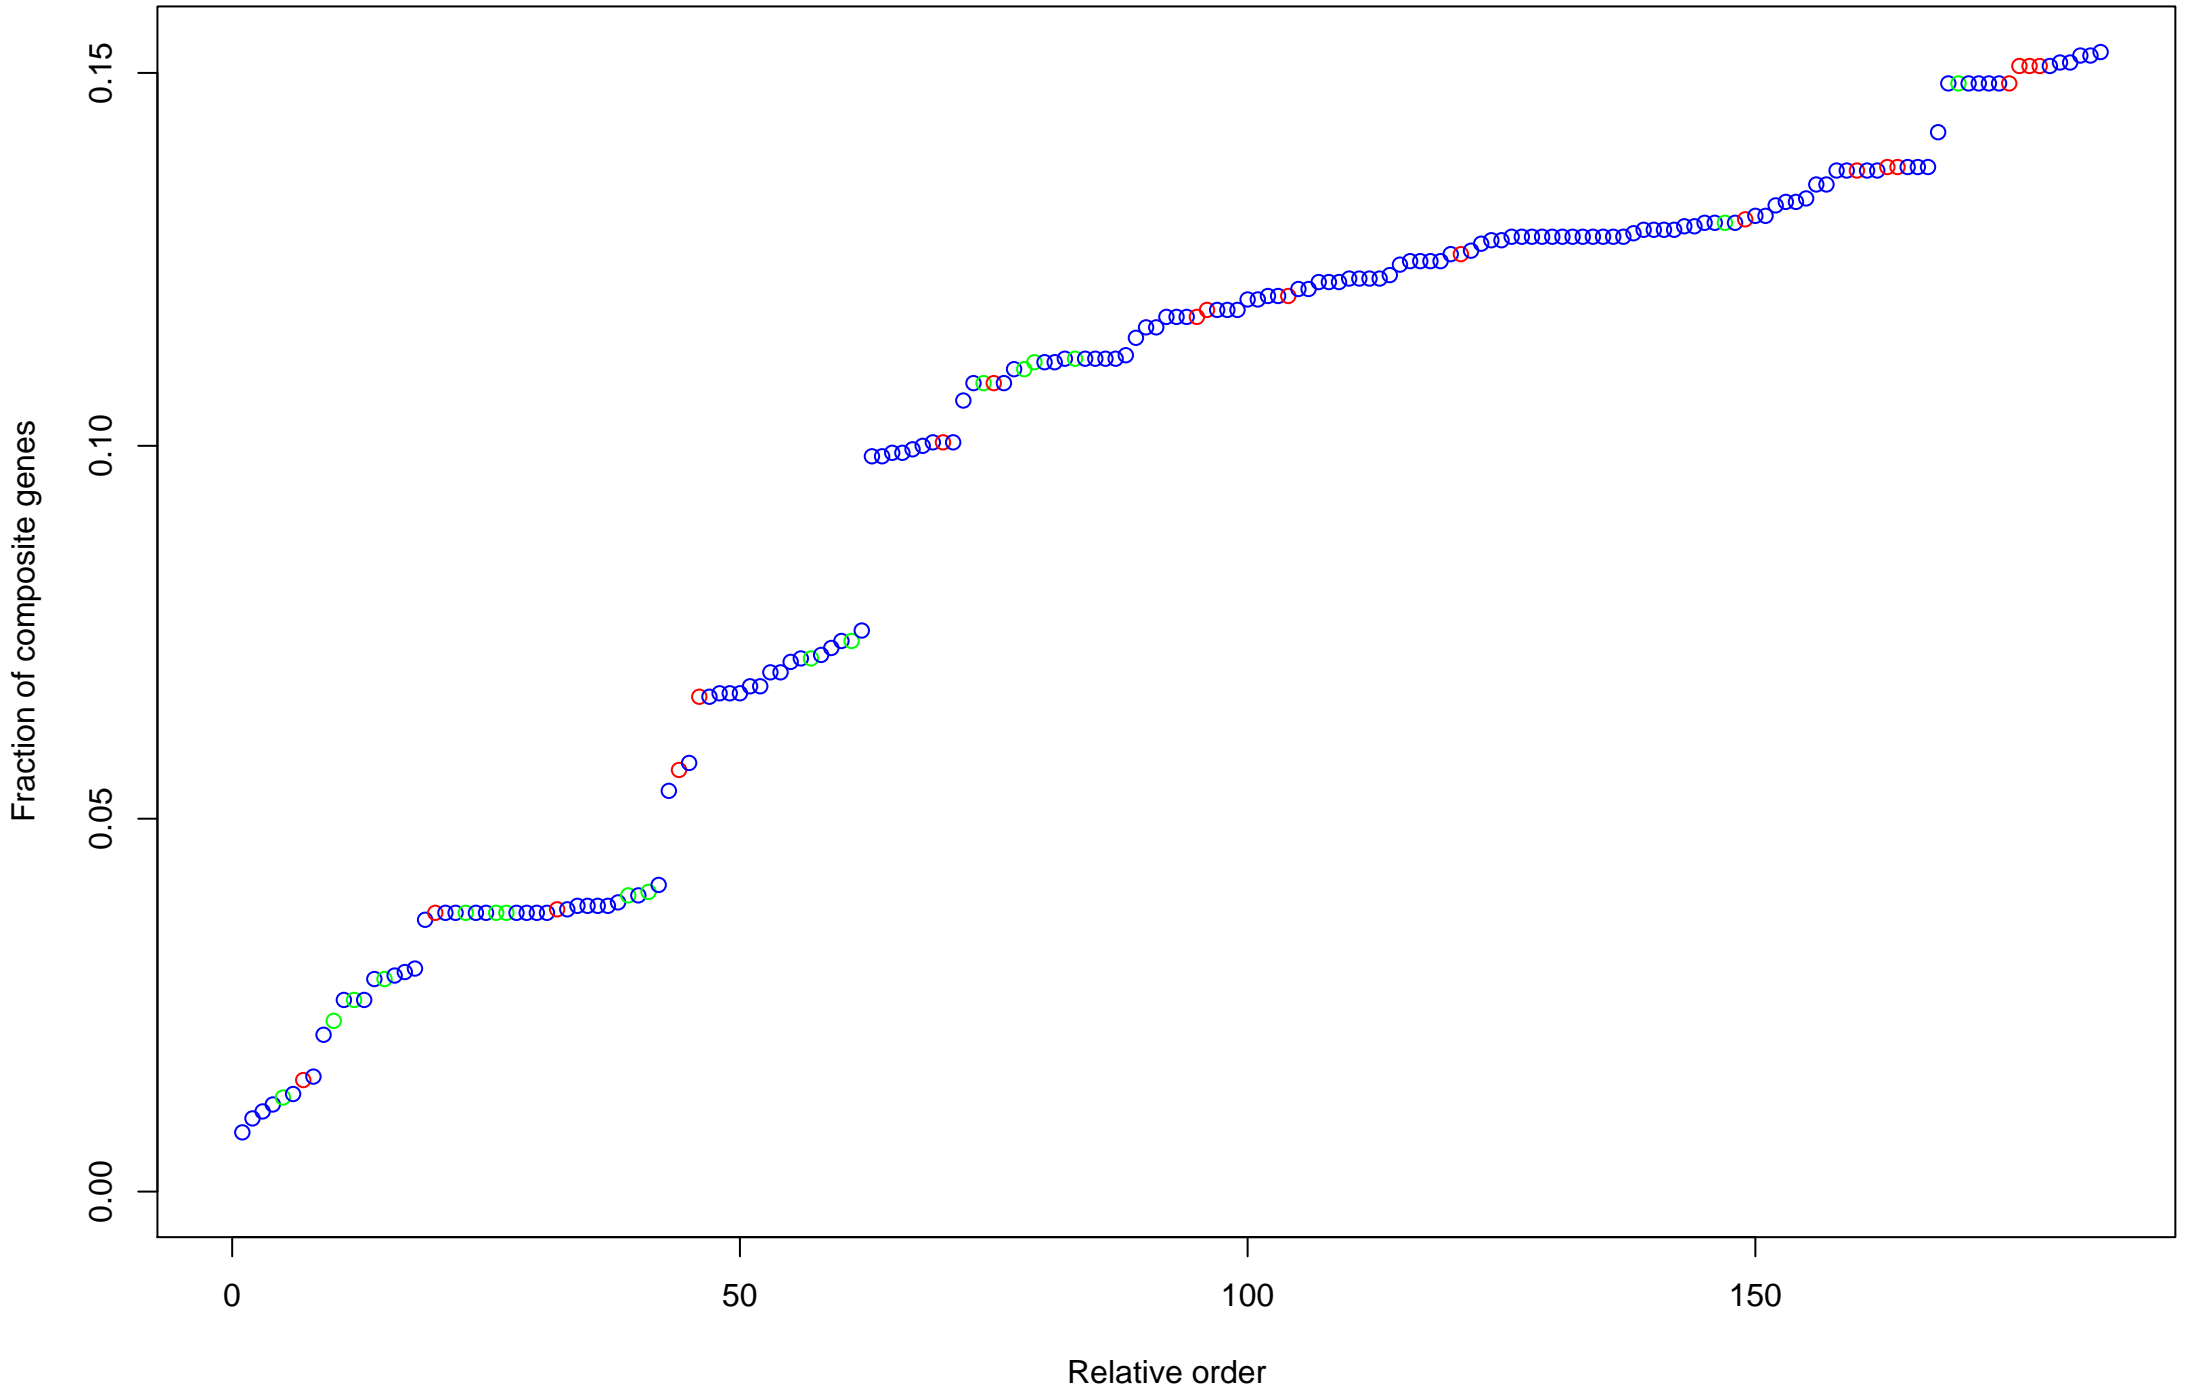

# SMEL-102-01 (*Sinorhizobium meliloti*)

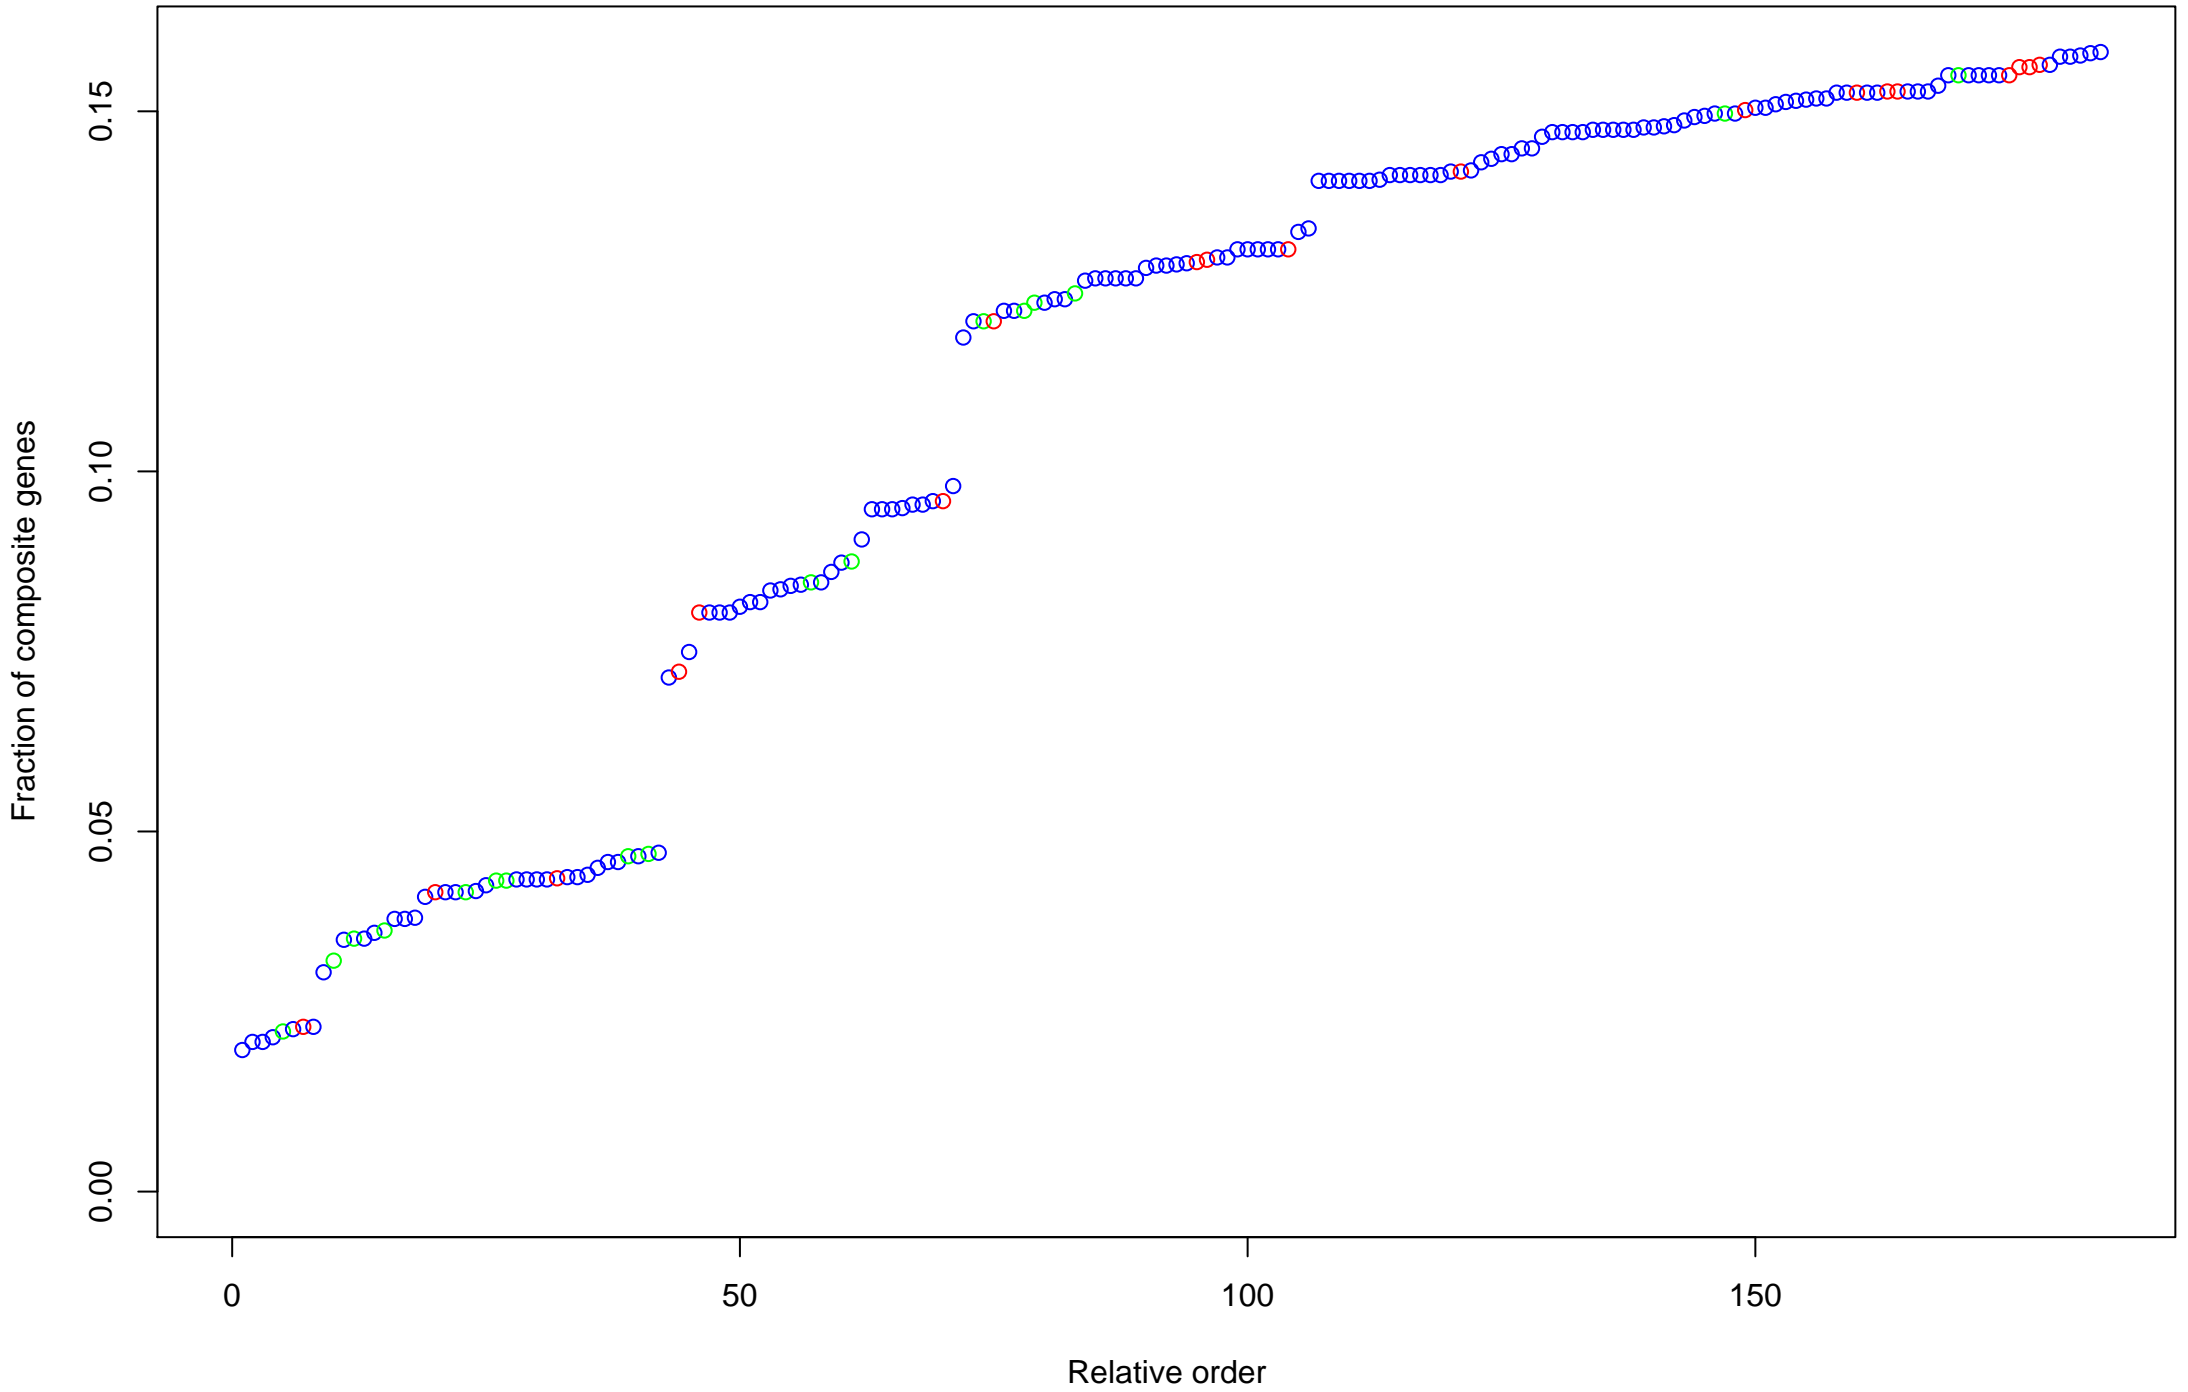

# CACE-ATC-01 (*Clostridium acetobutylicum*)

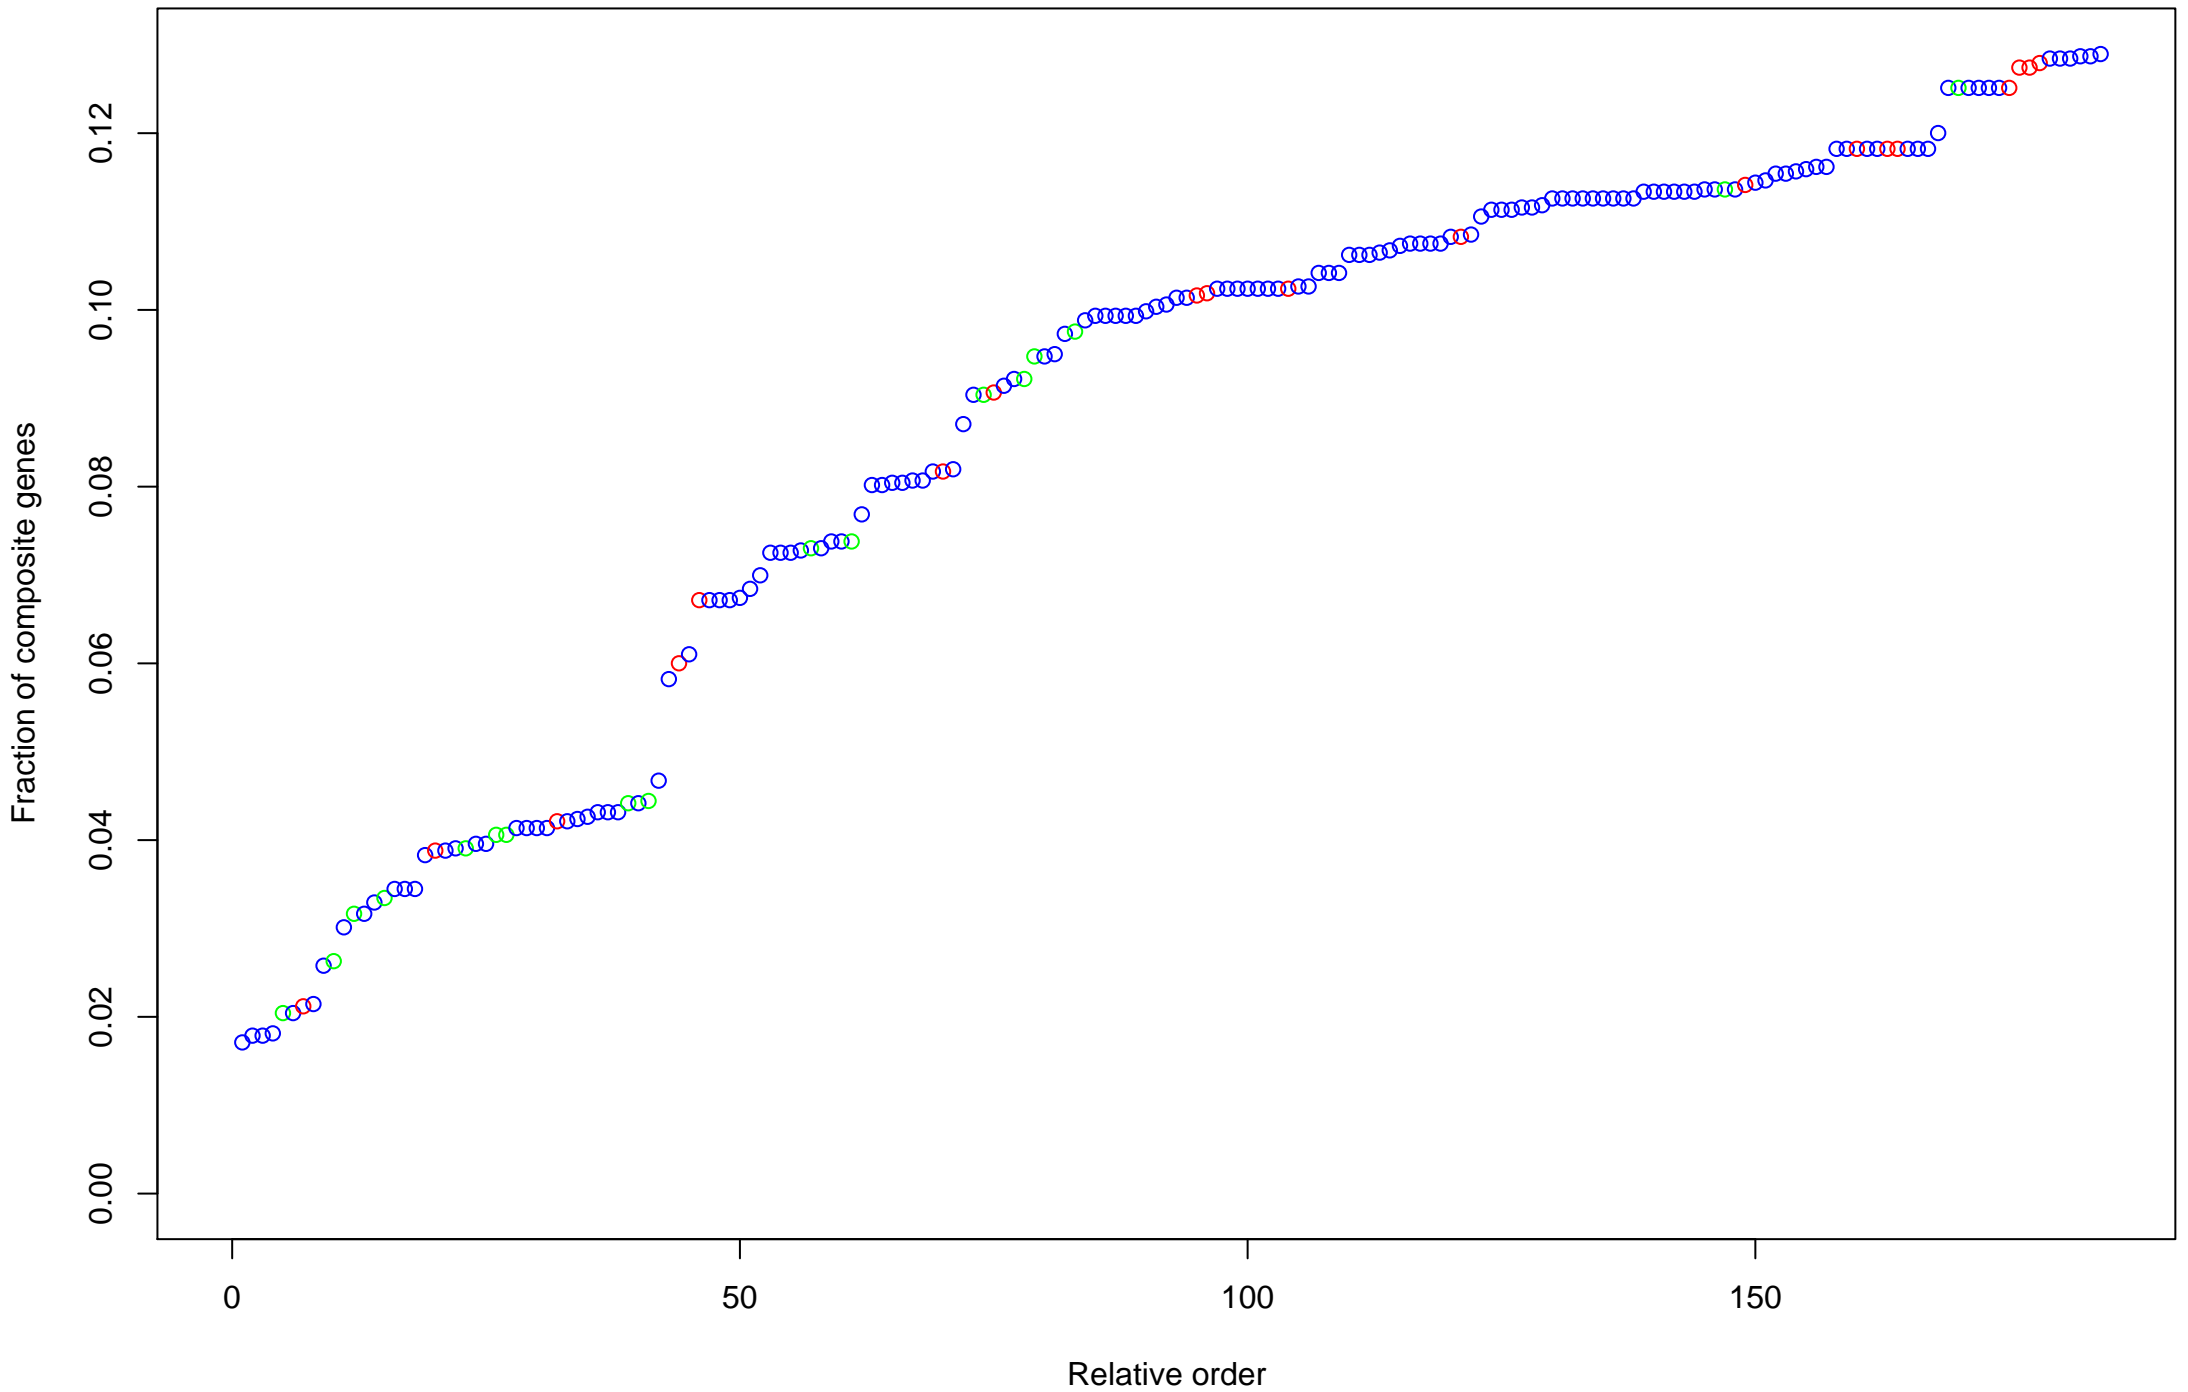

# ATUM-C58-01 (*Agrobacterium tumefaciens*)

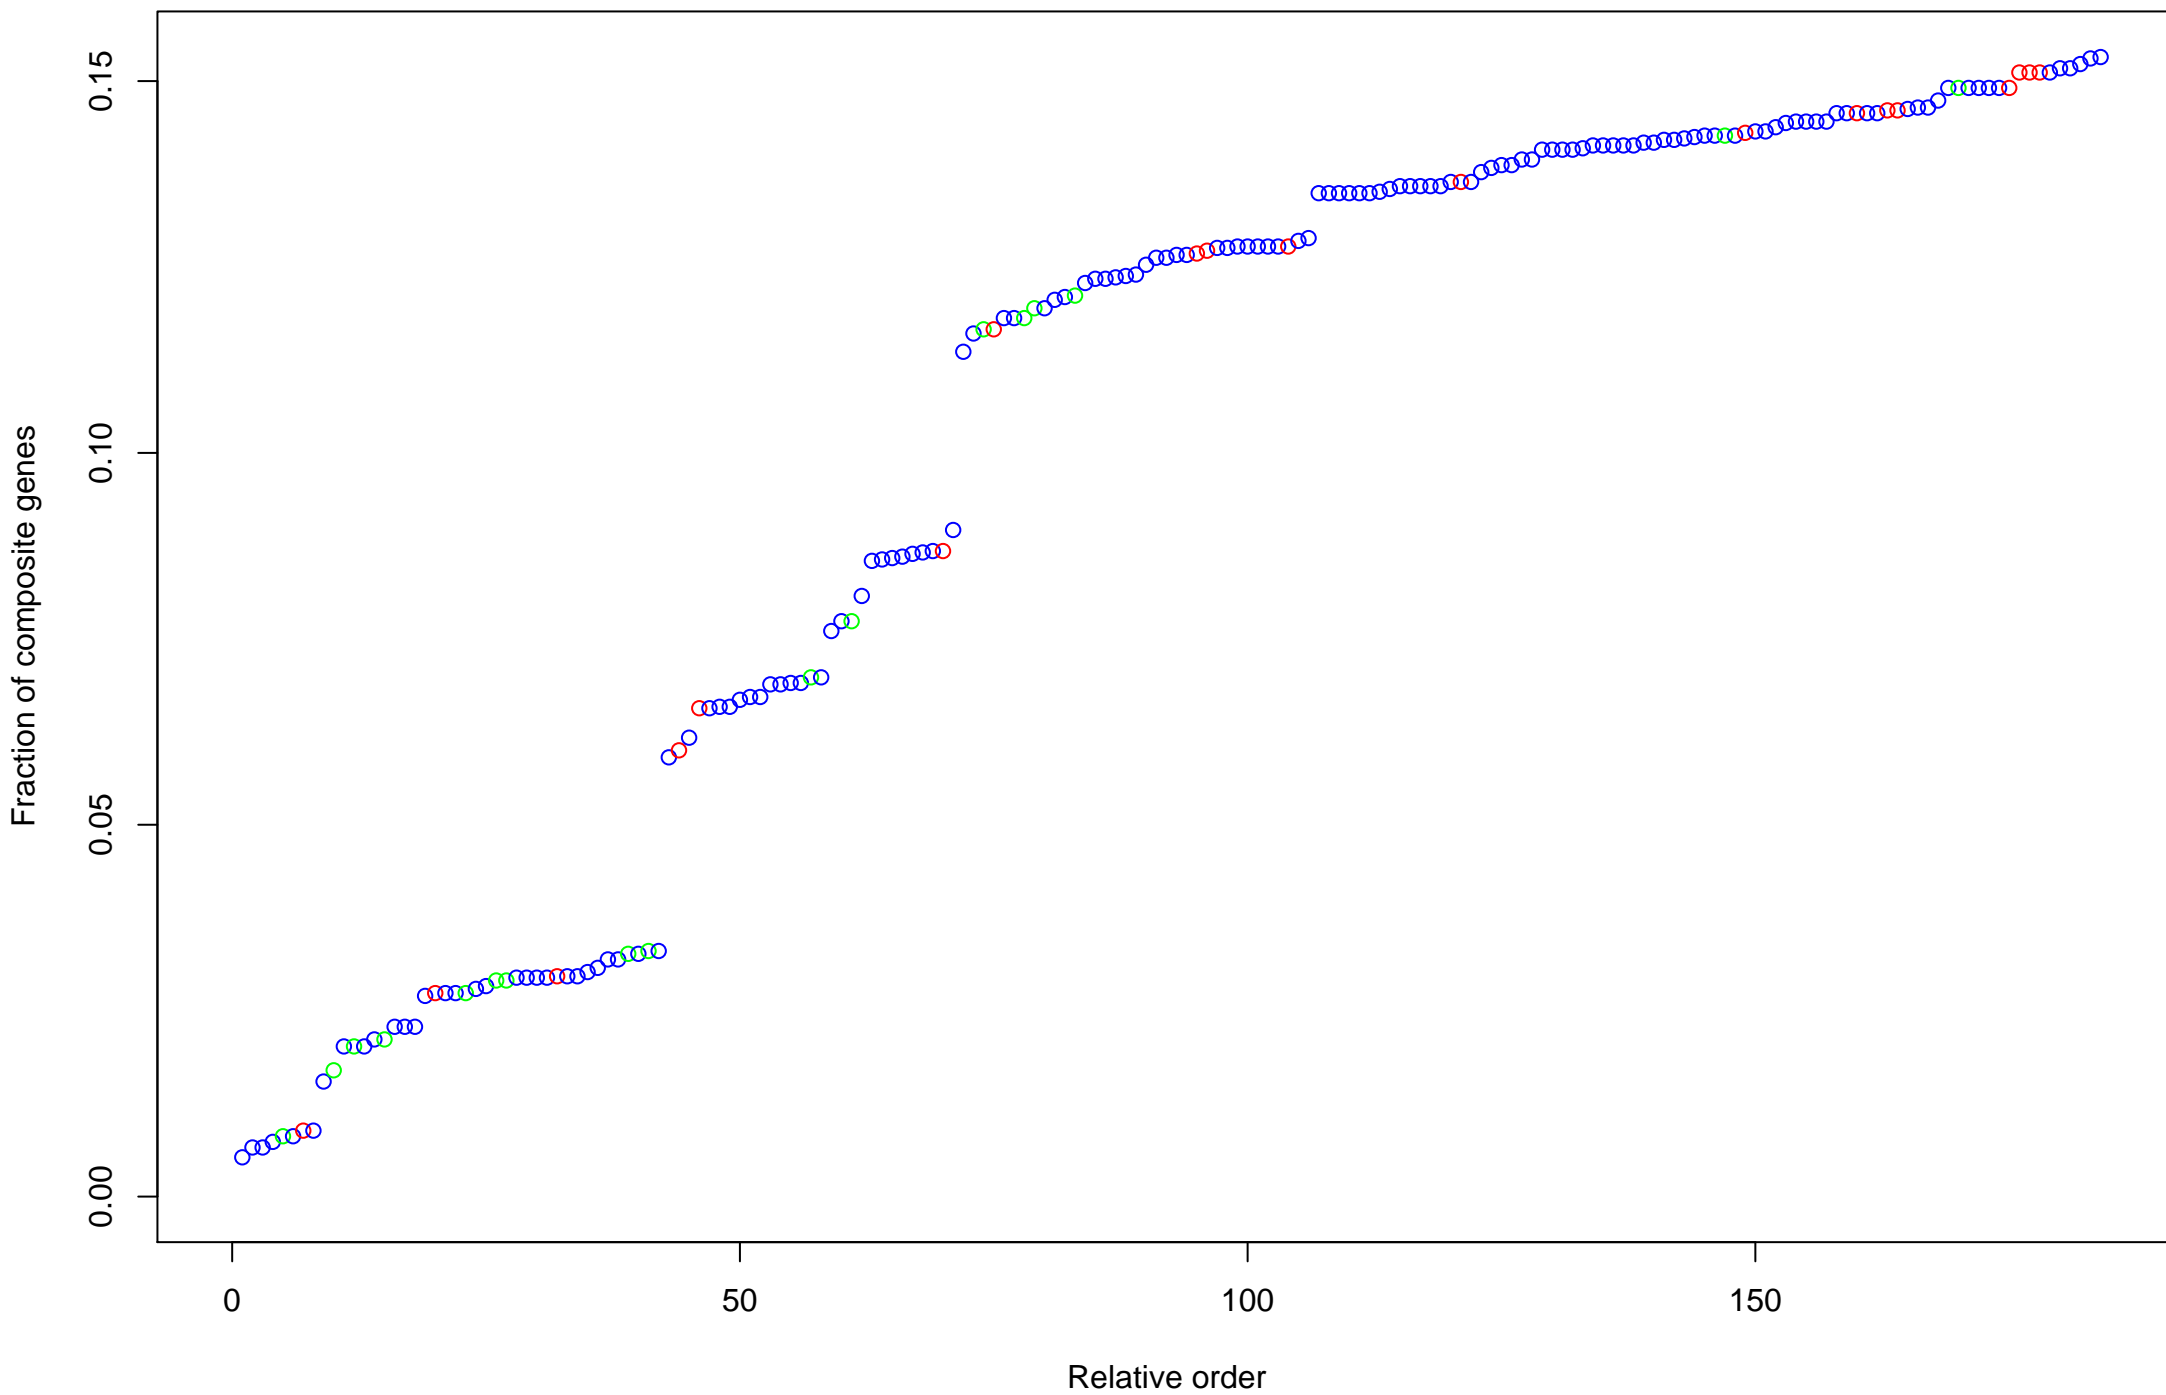

# STOK-XX7-01 (*Sulfolobus tokodaii*)

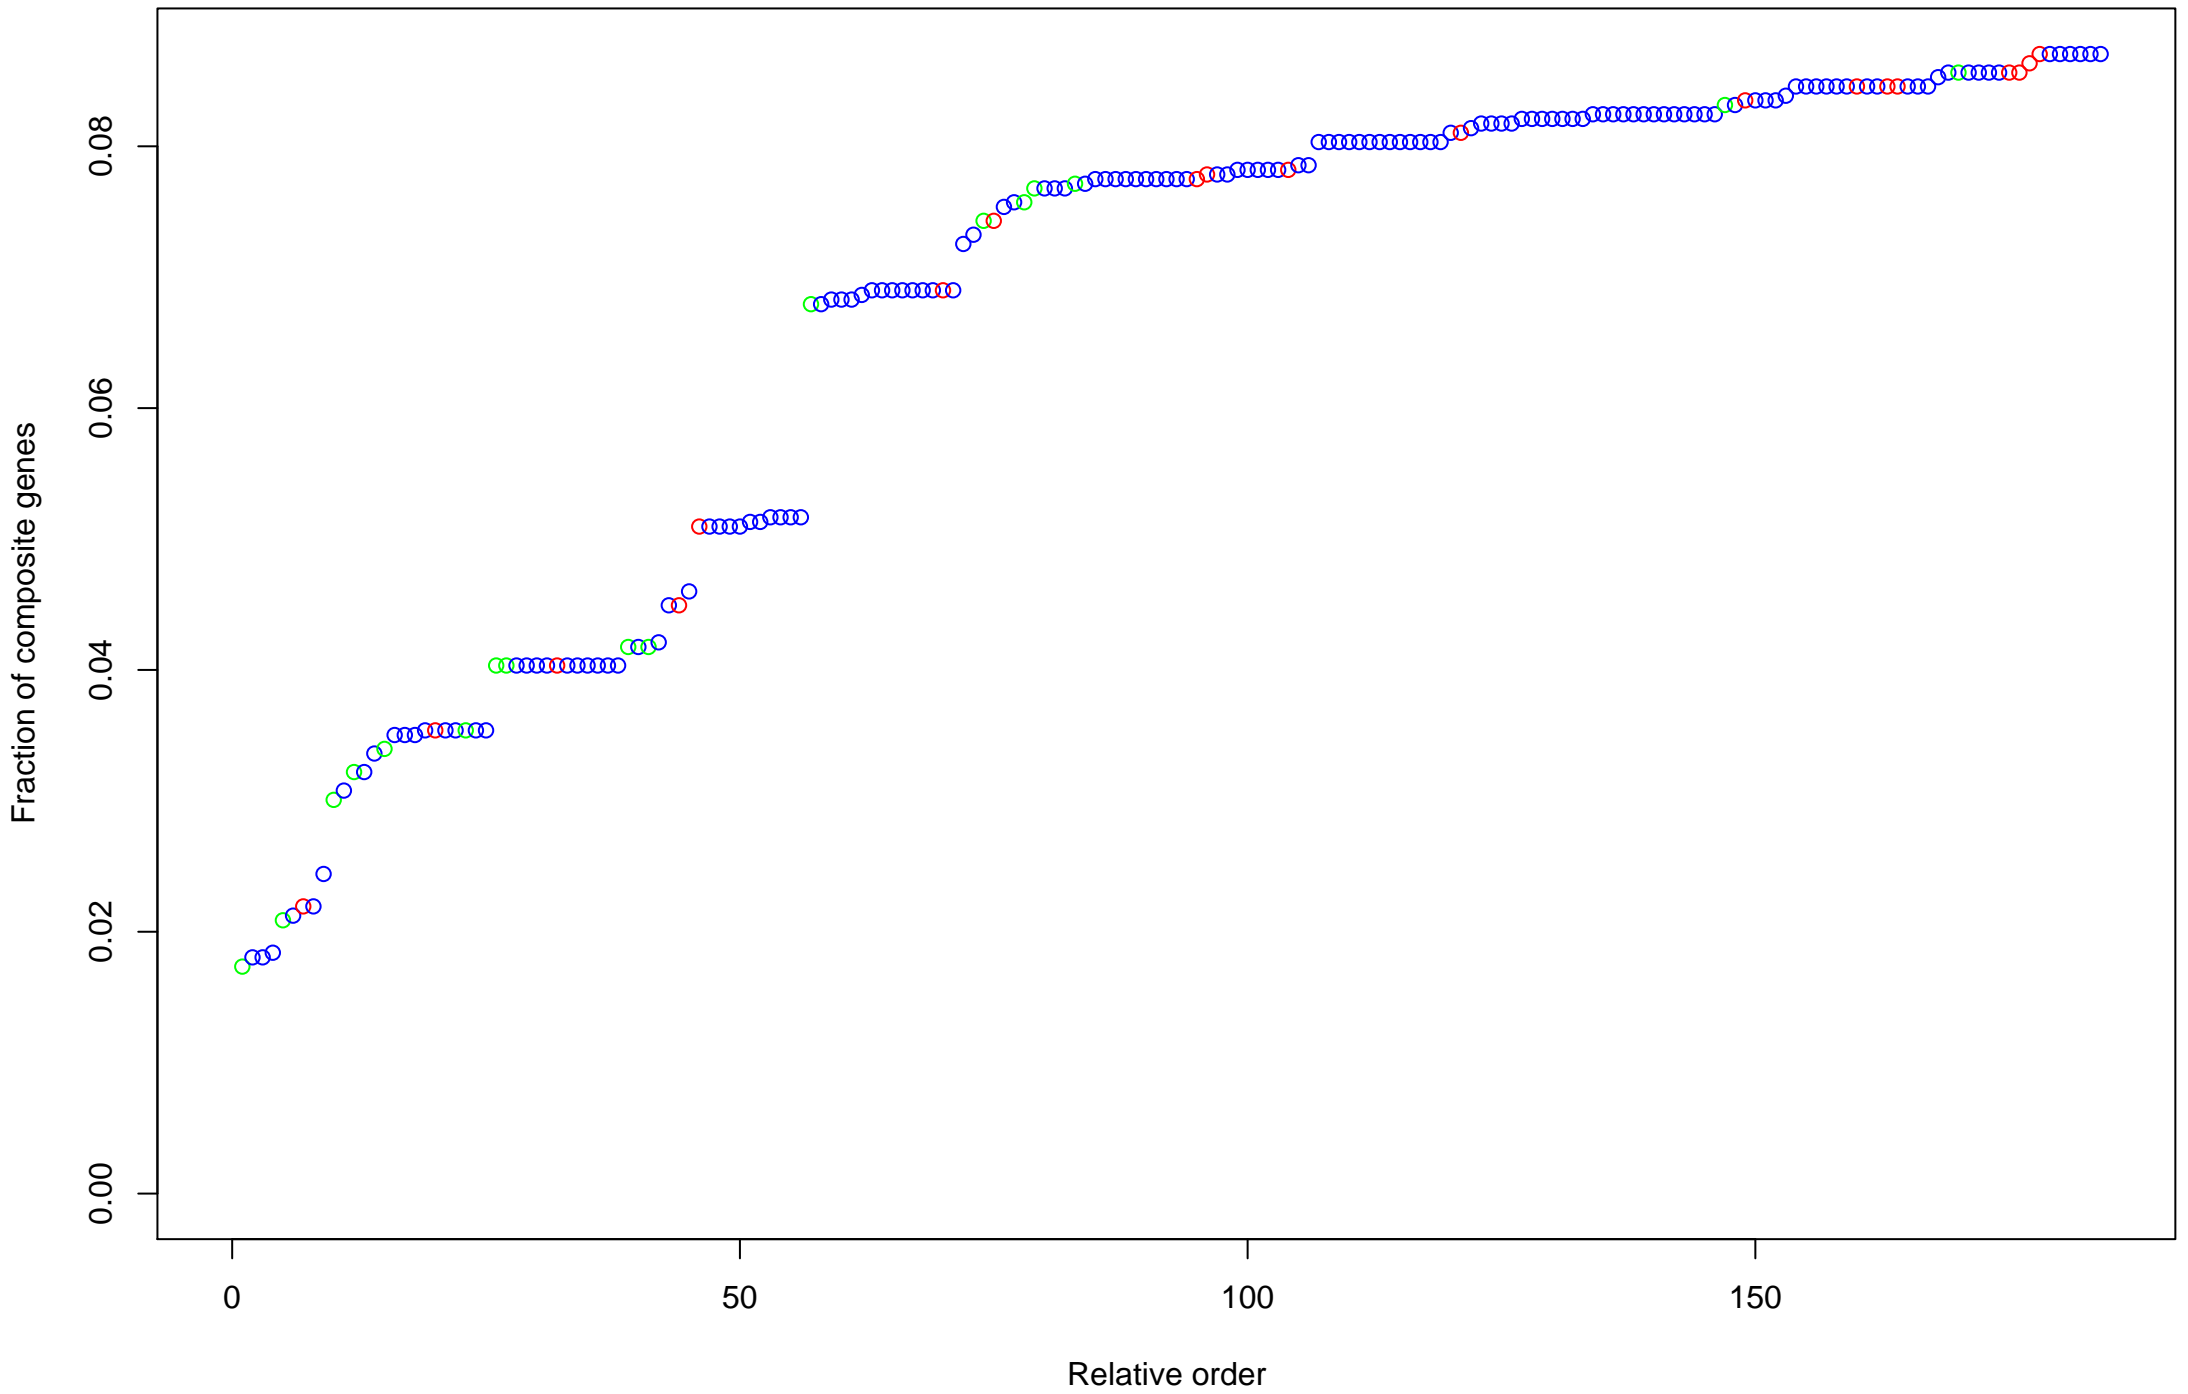

# RCON-MAL-01 (*Rickettsia conorii*)

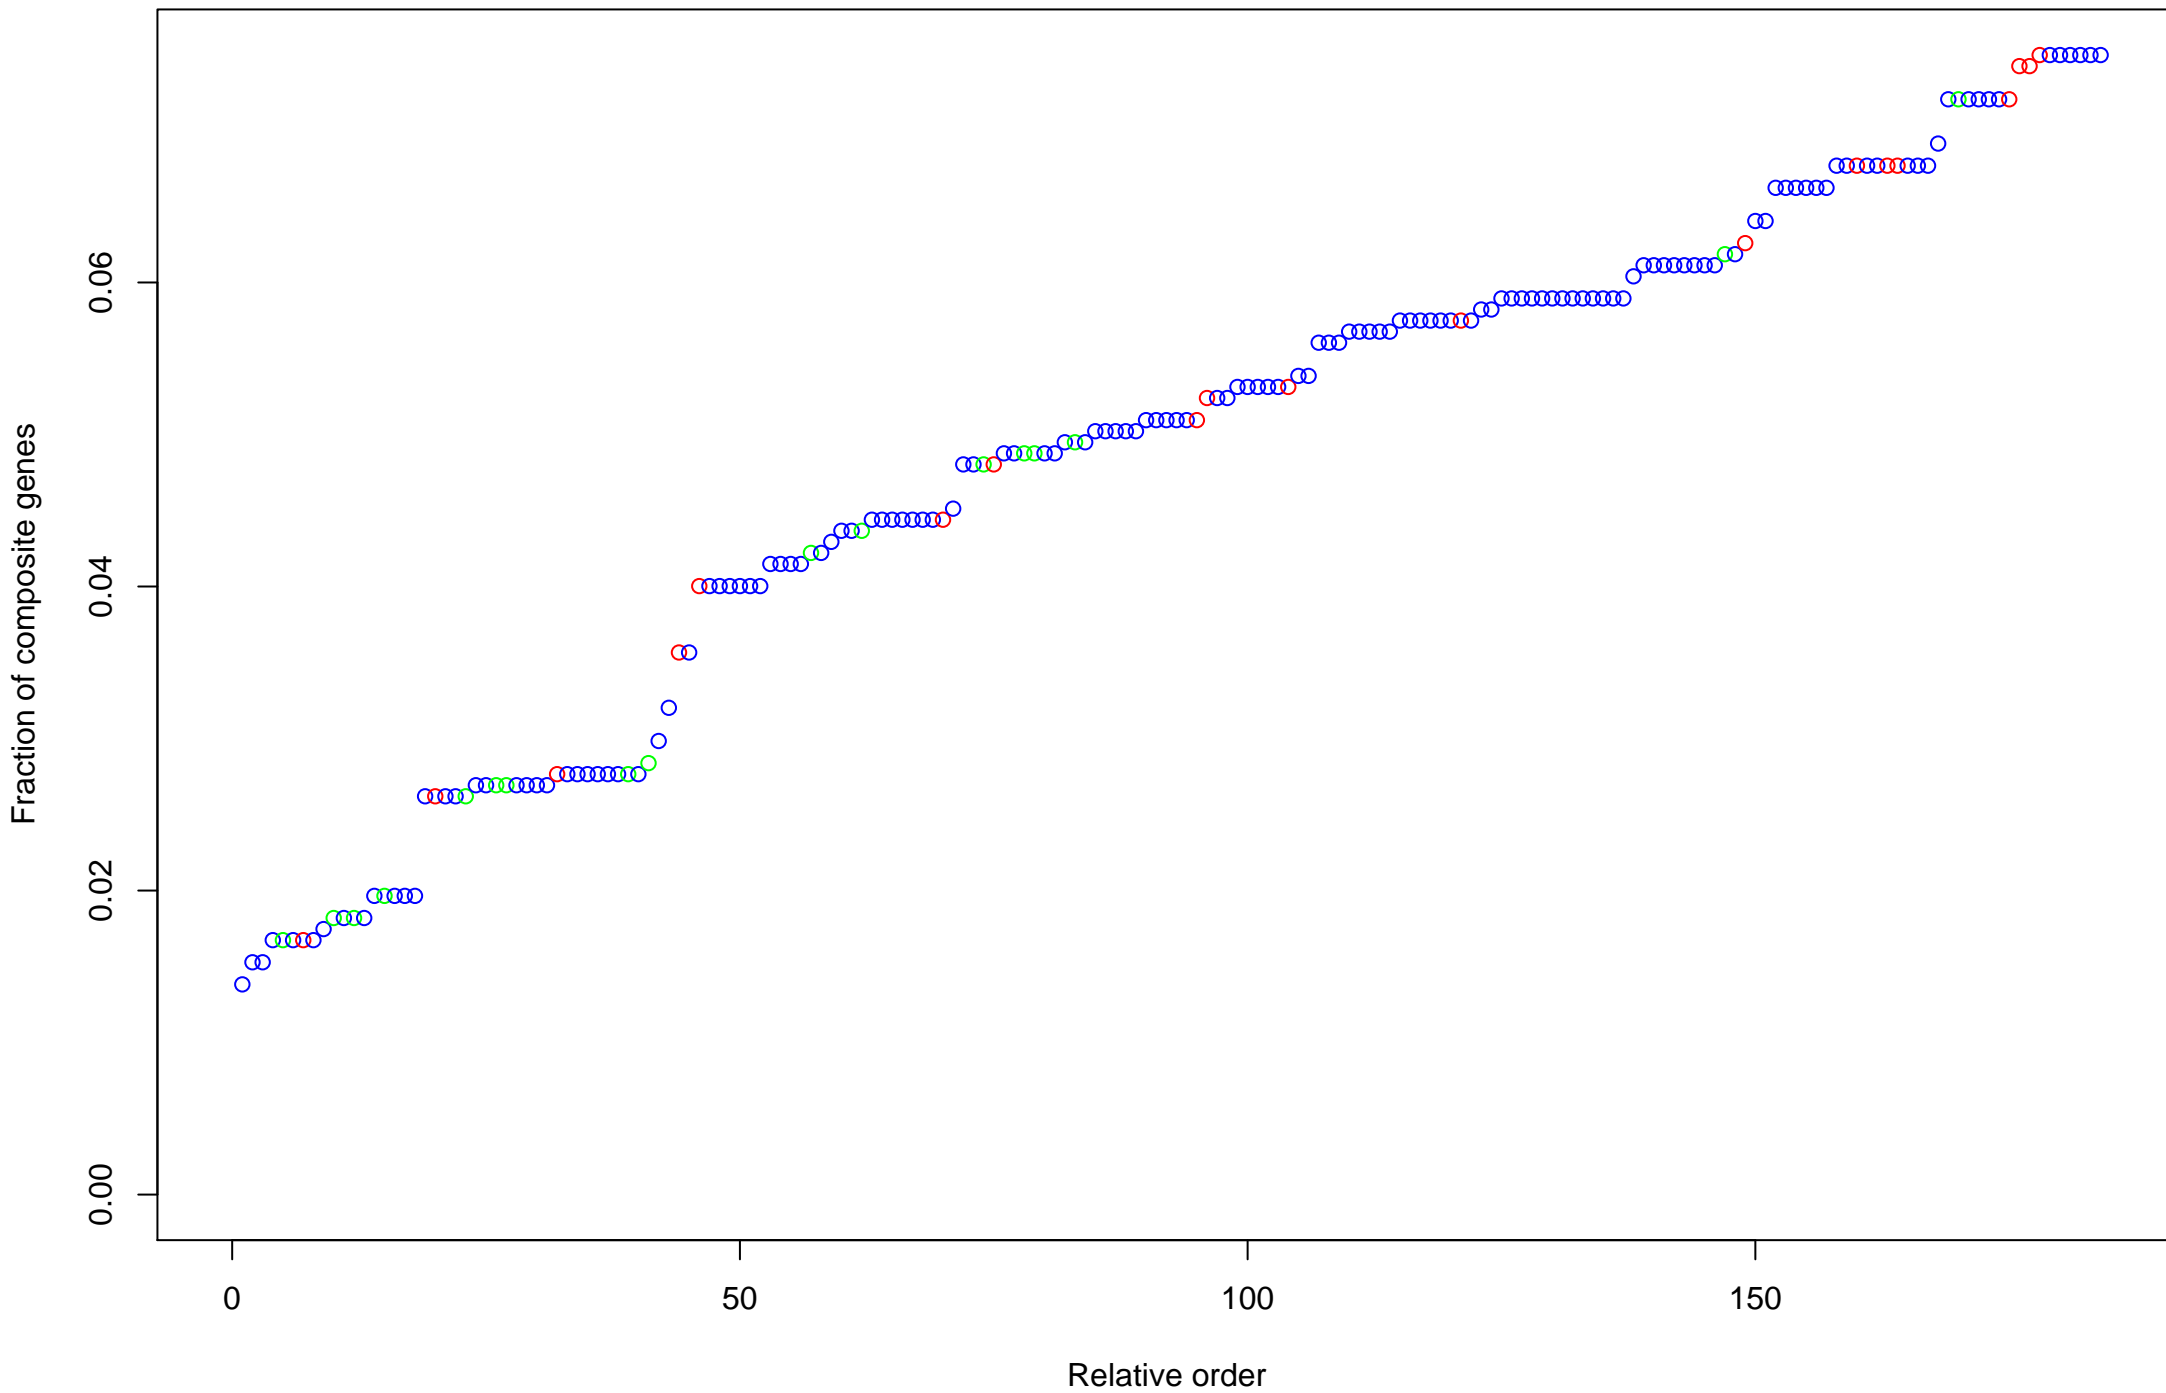

# SPNE-XR6-01 (*Streptococcus pneumoniae*)

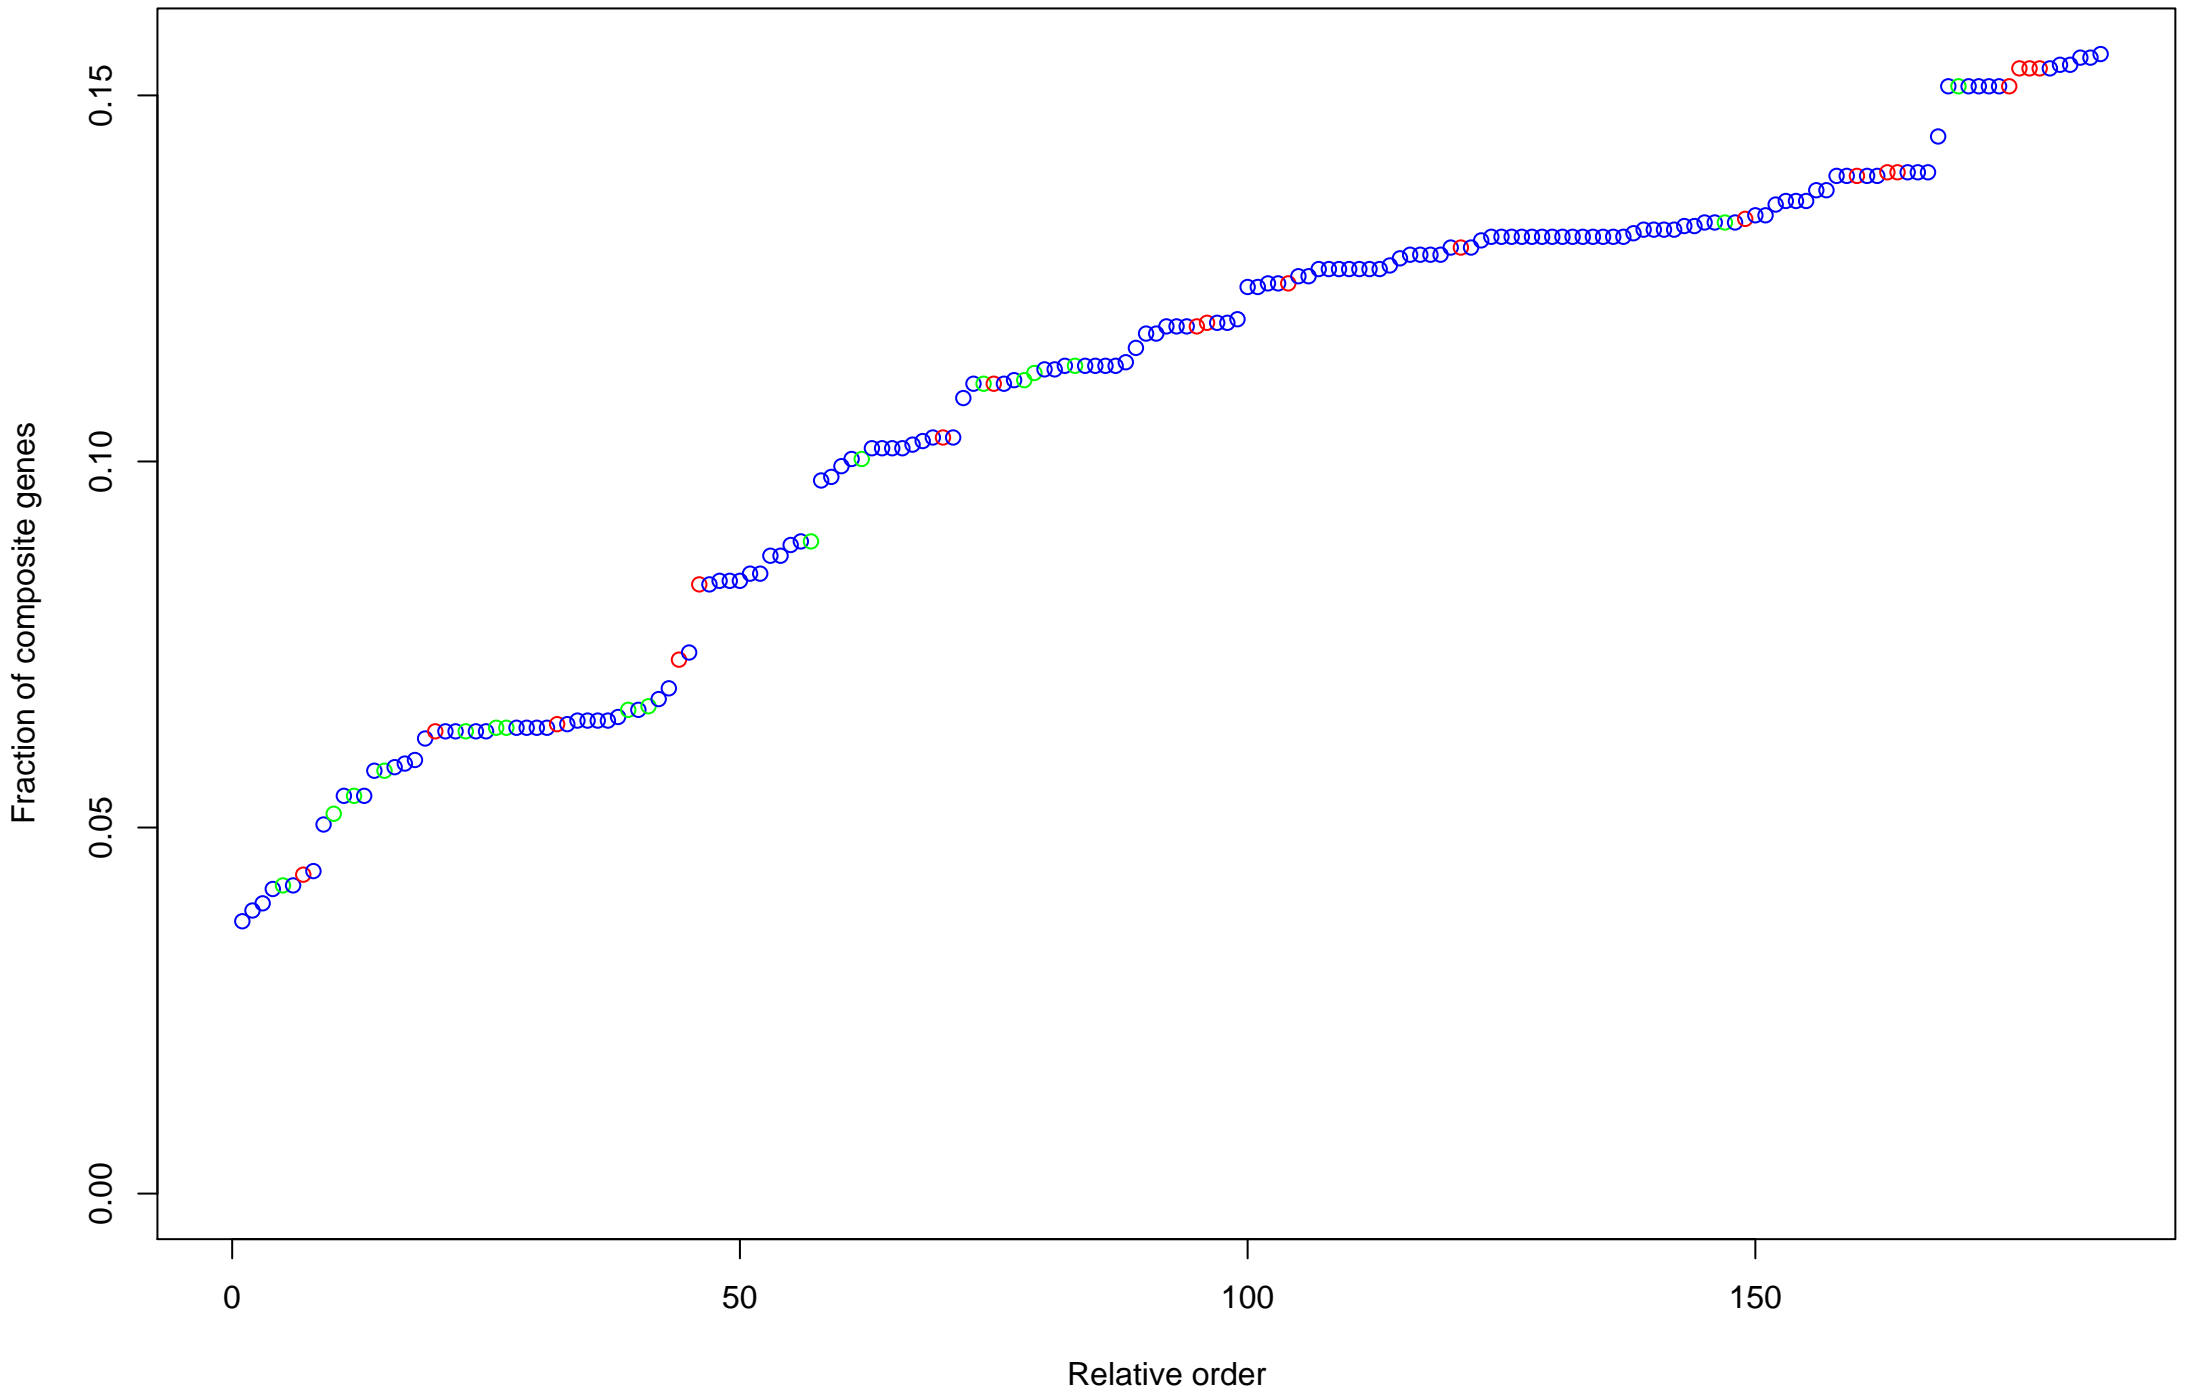

# YPES-CO9-01 (*Yersinia pestis*)

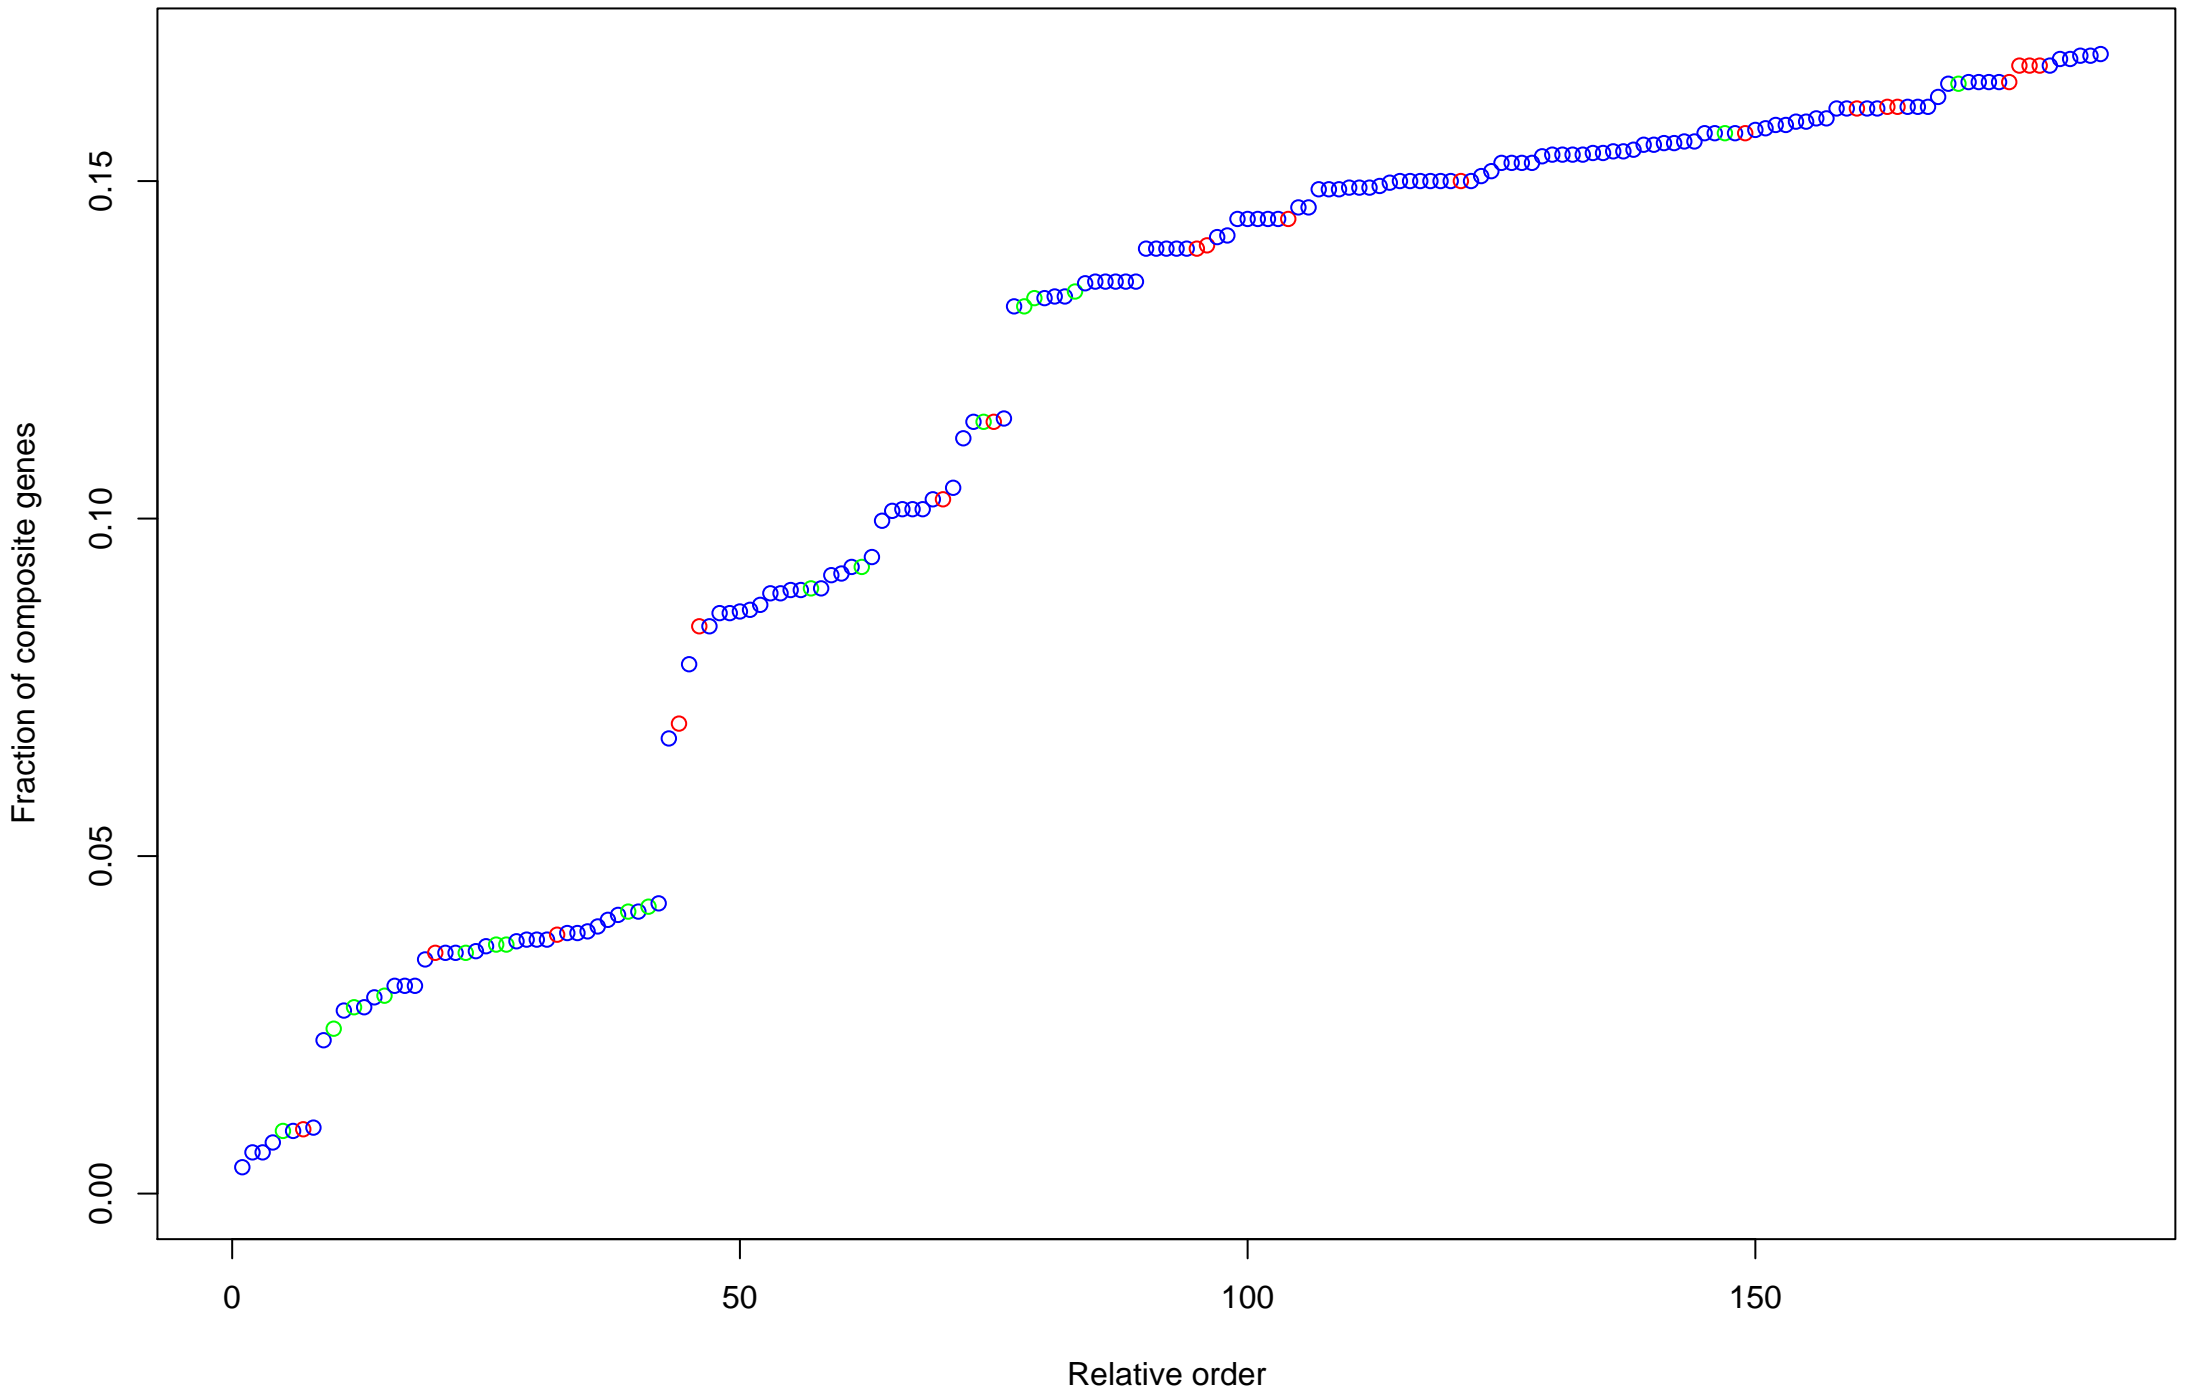



# SENT-CT1-02 (*Salmonella enterica* serovar Typhi)

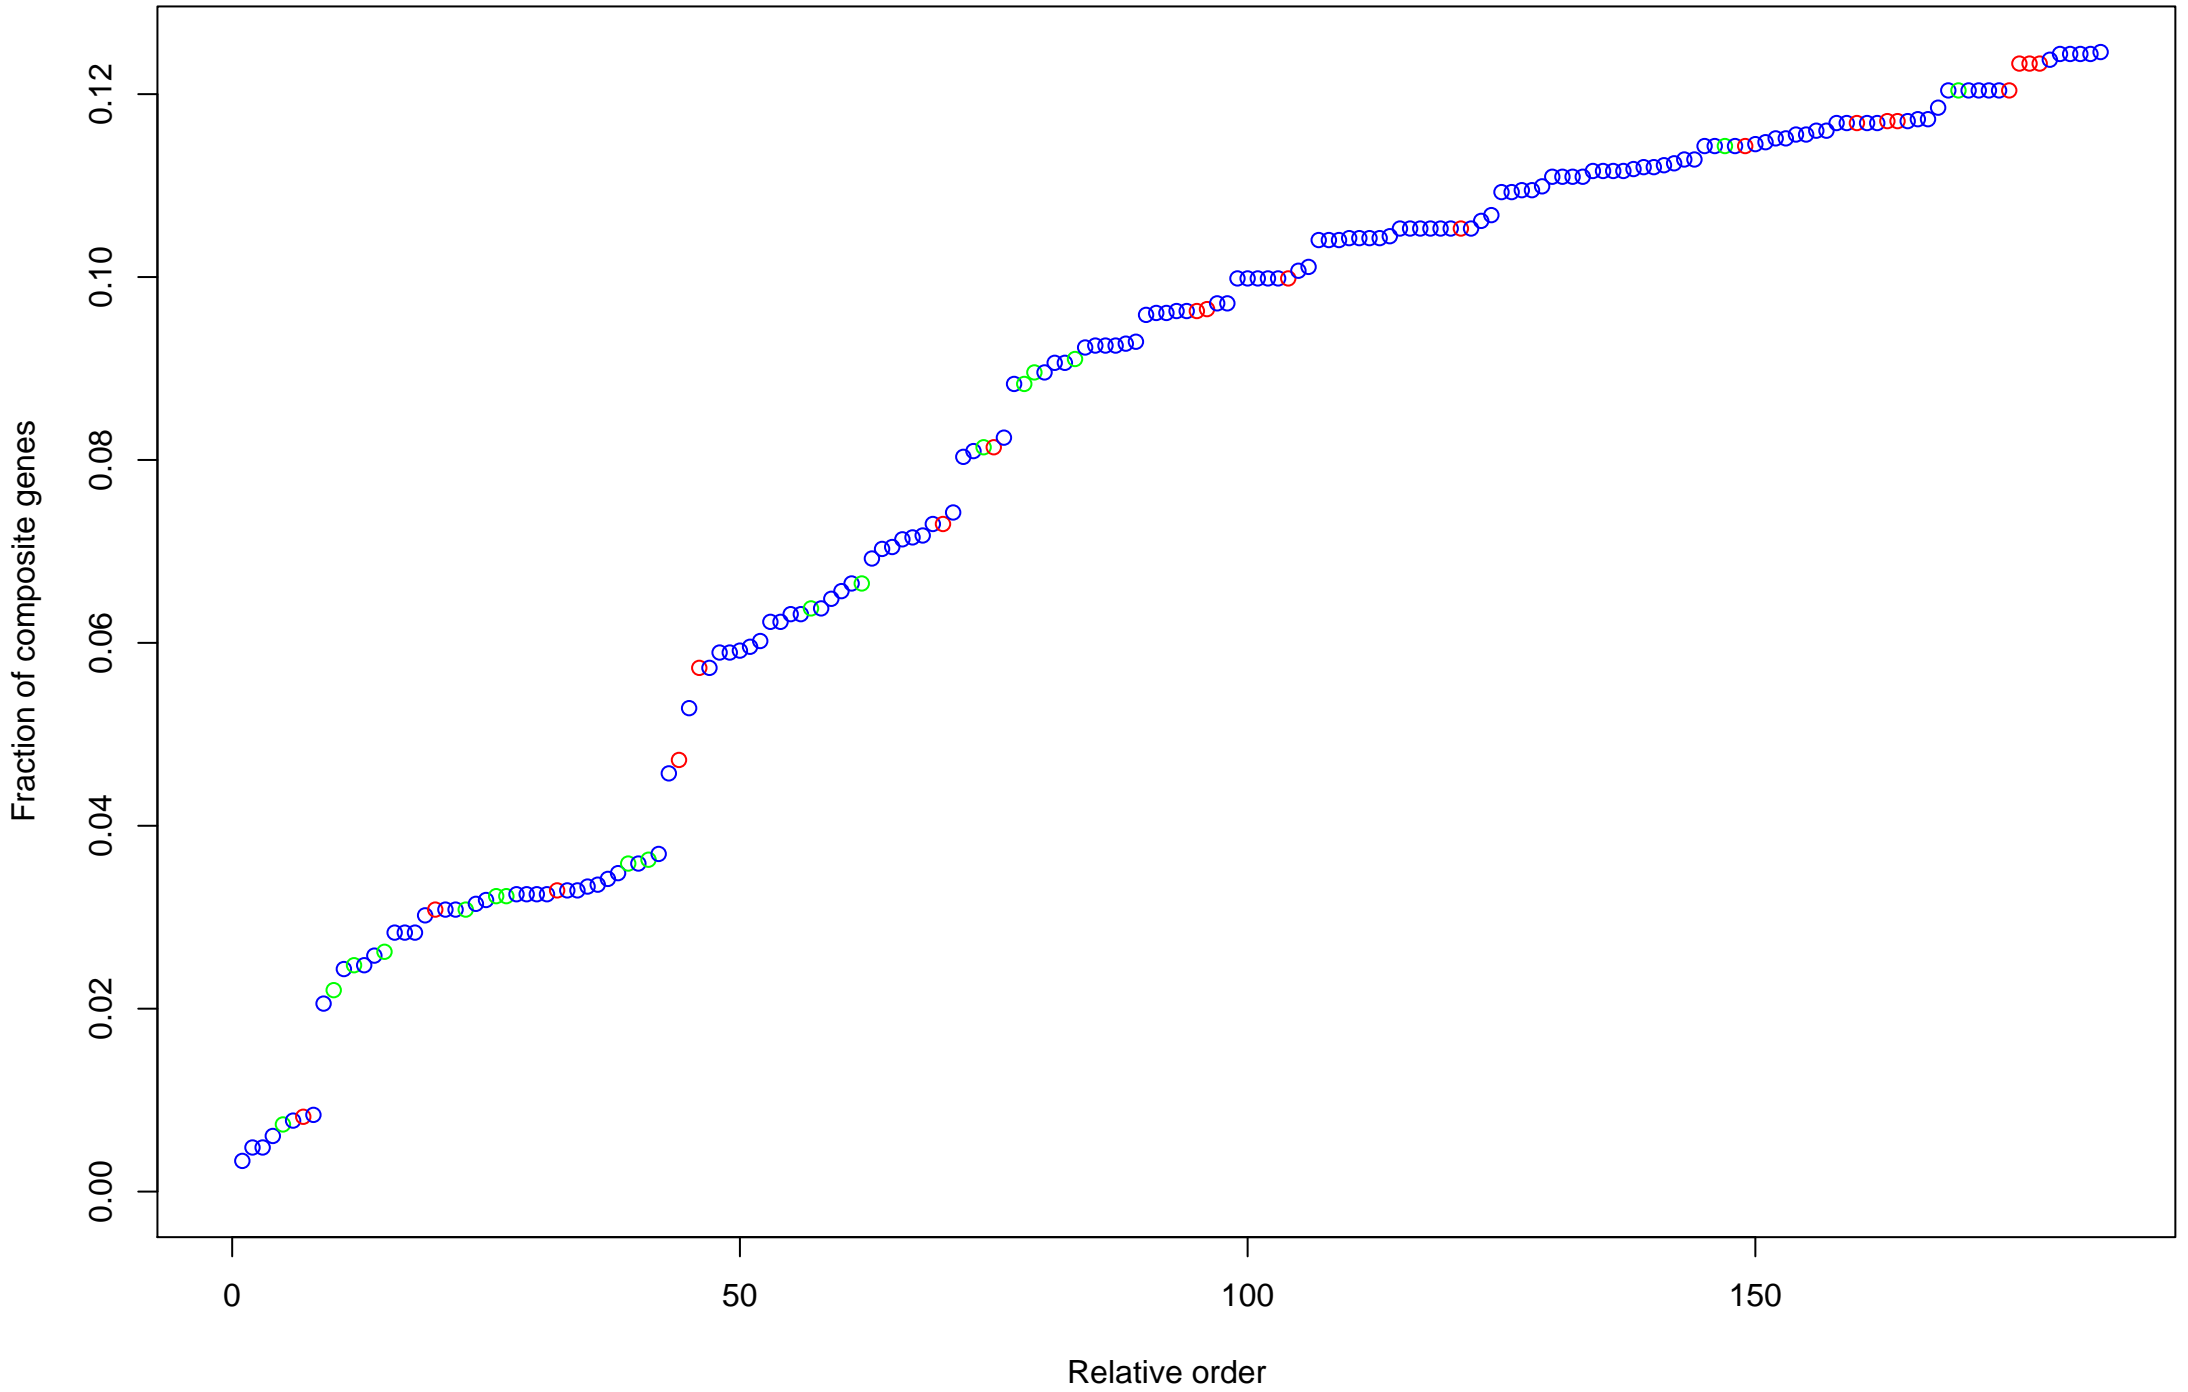

# SENT-LT2-01 (*Salmonella enterica* serovar Typhimurium)

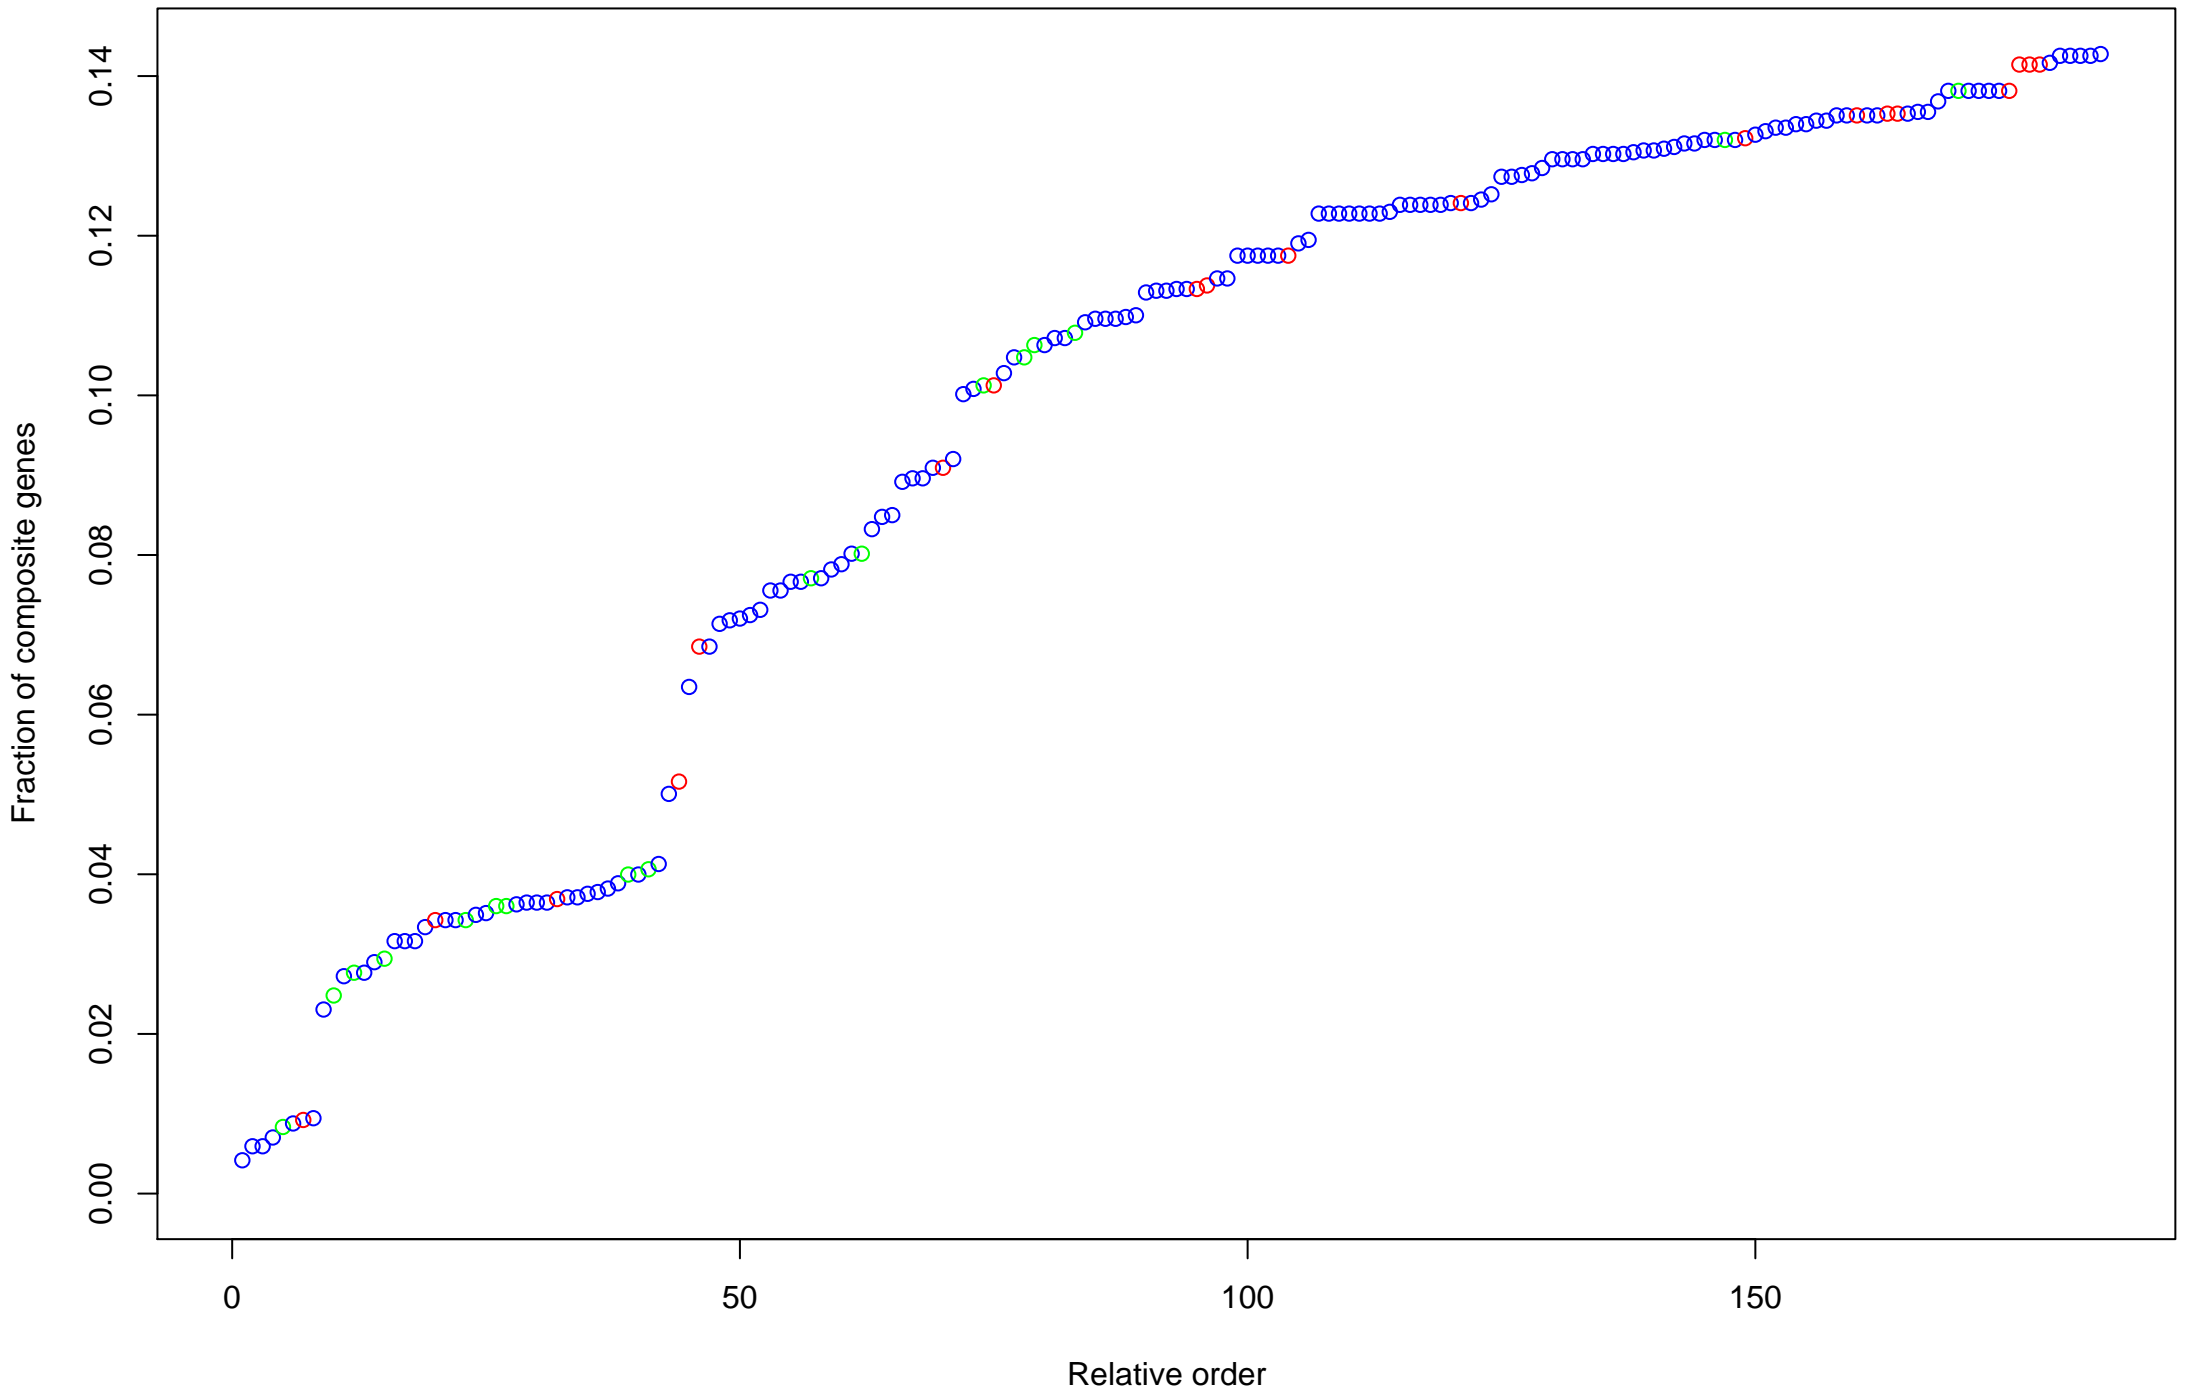

# LINN-CLI-01 (*Listeria innocua*)

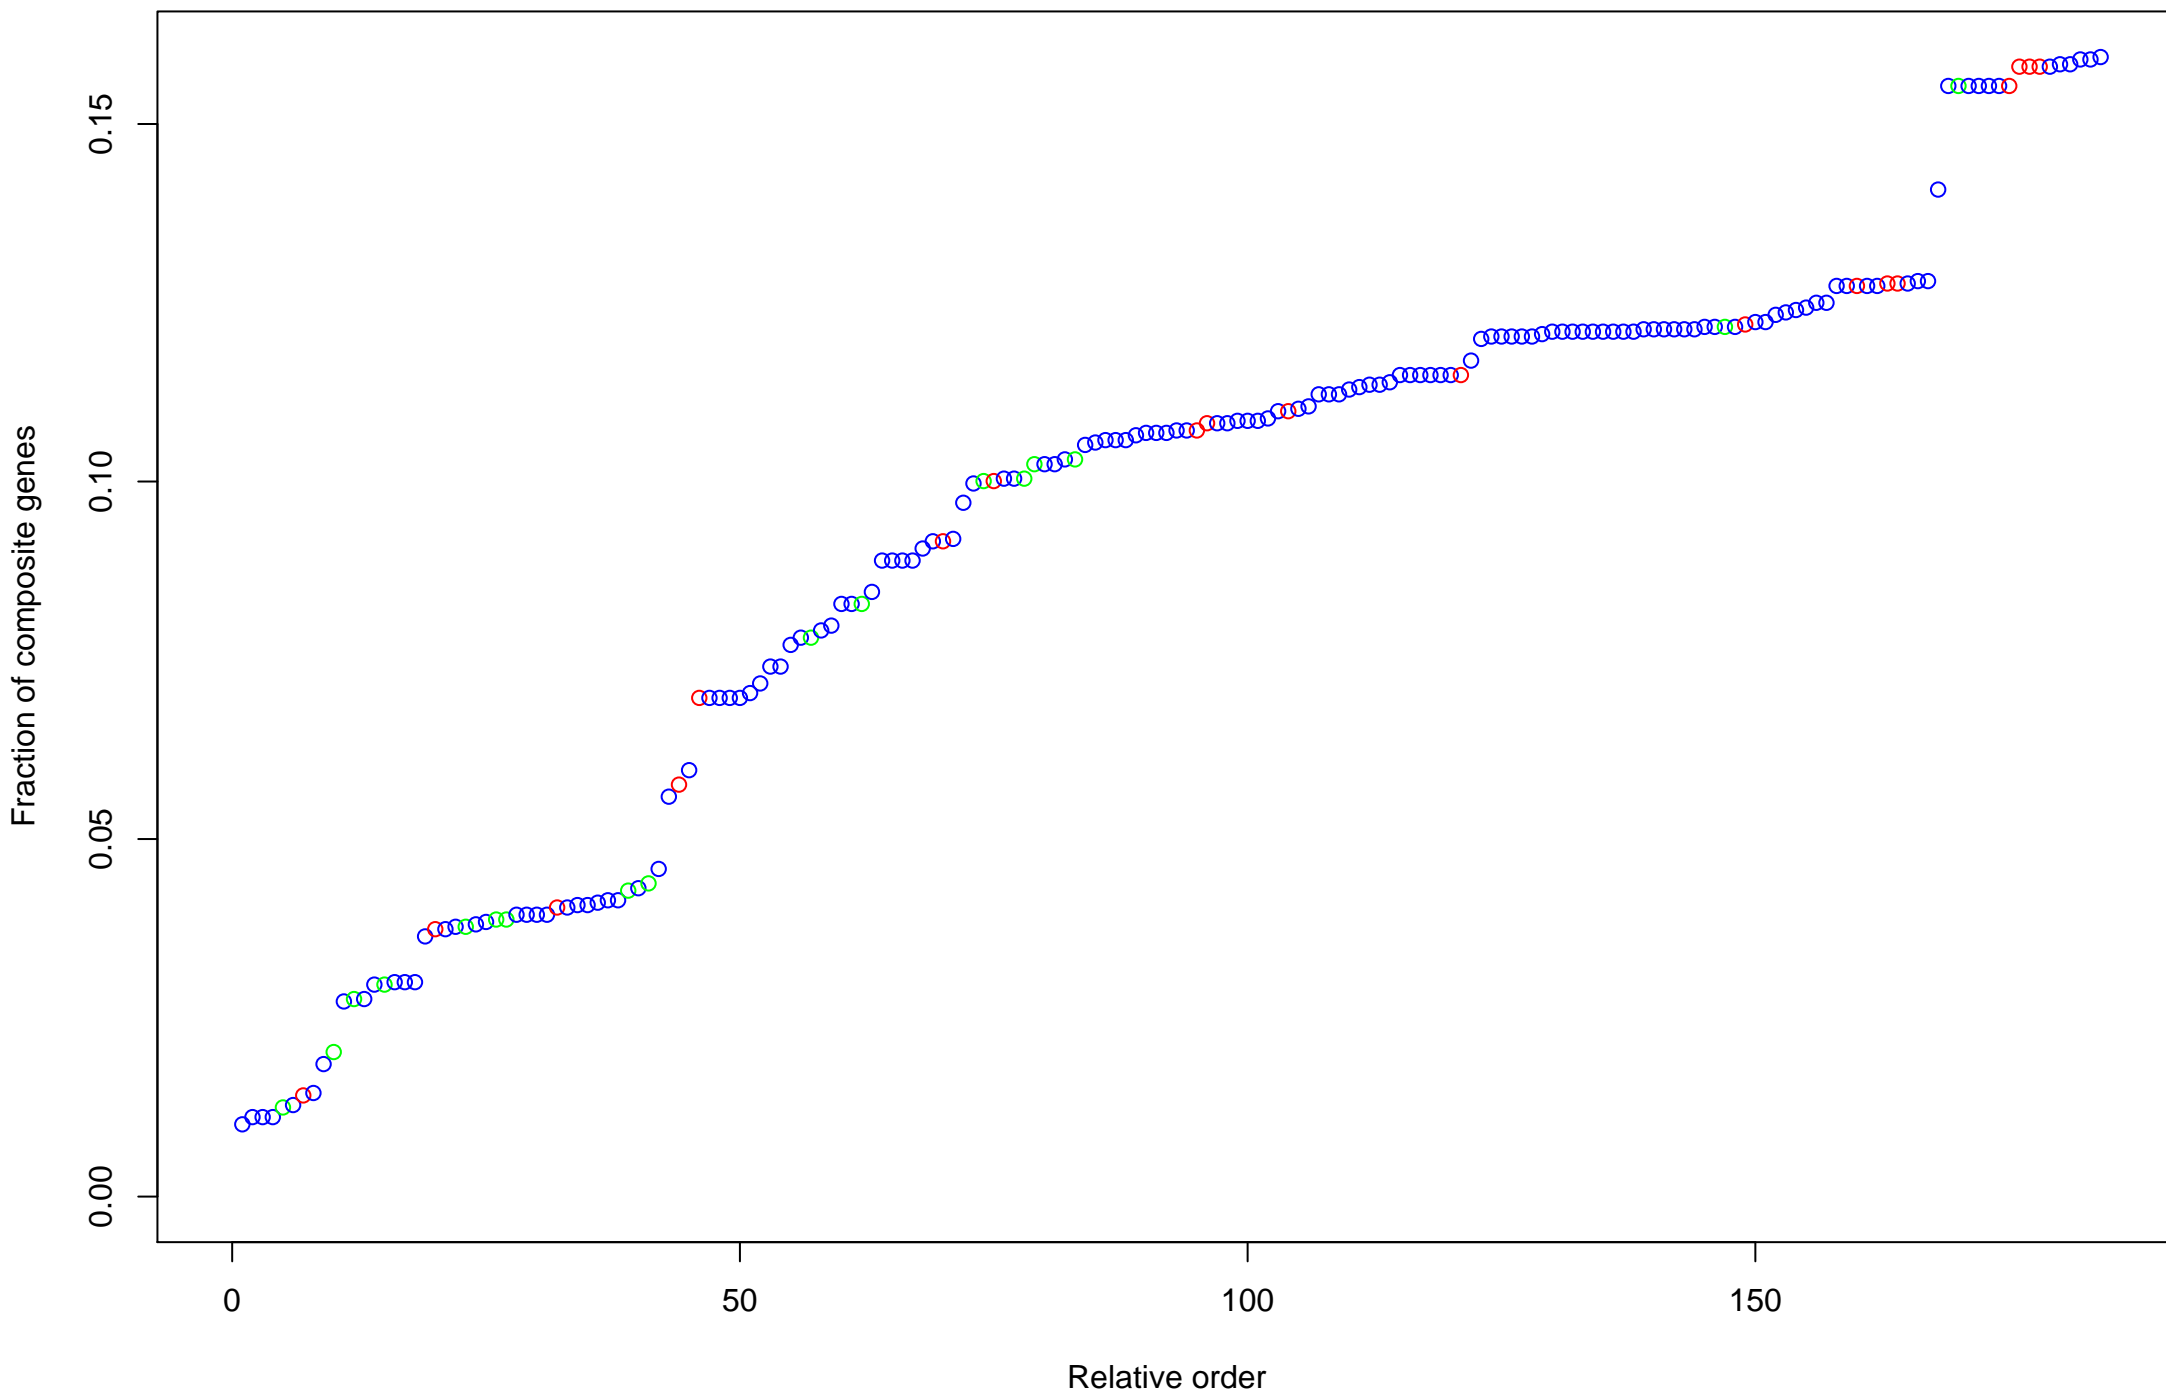

# LMON-EGD-01 (*Listeria monocytogenes*)

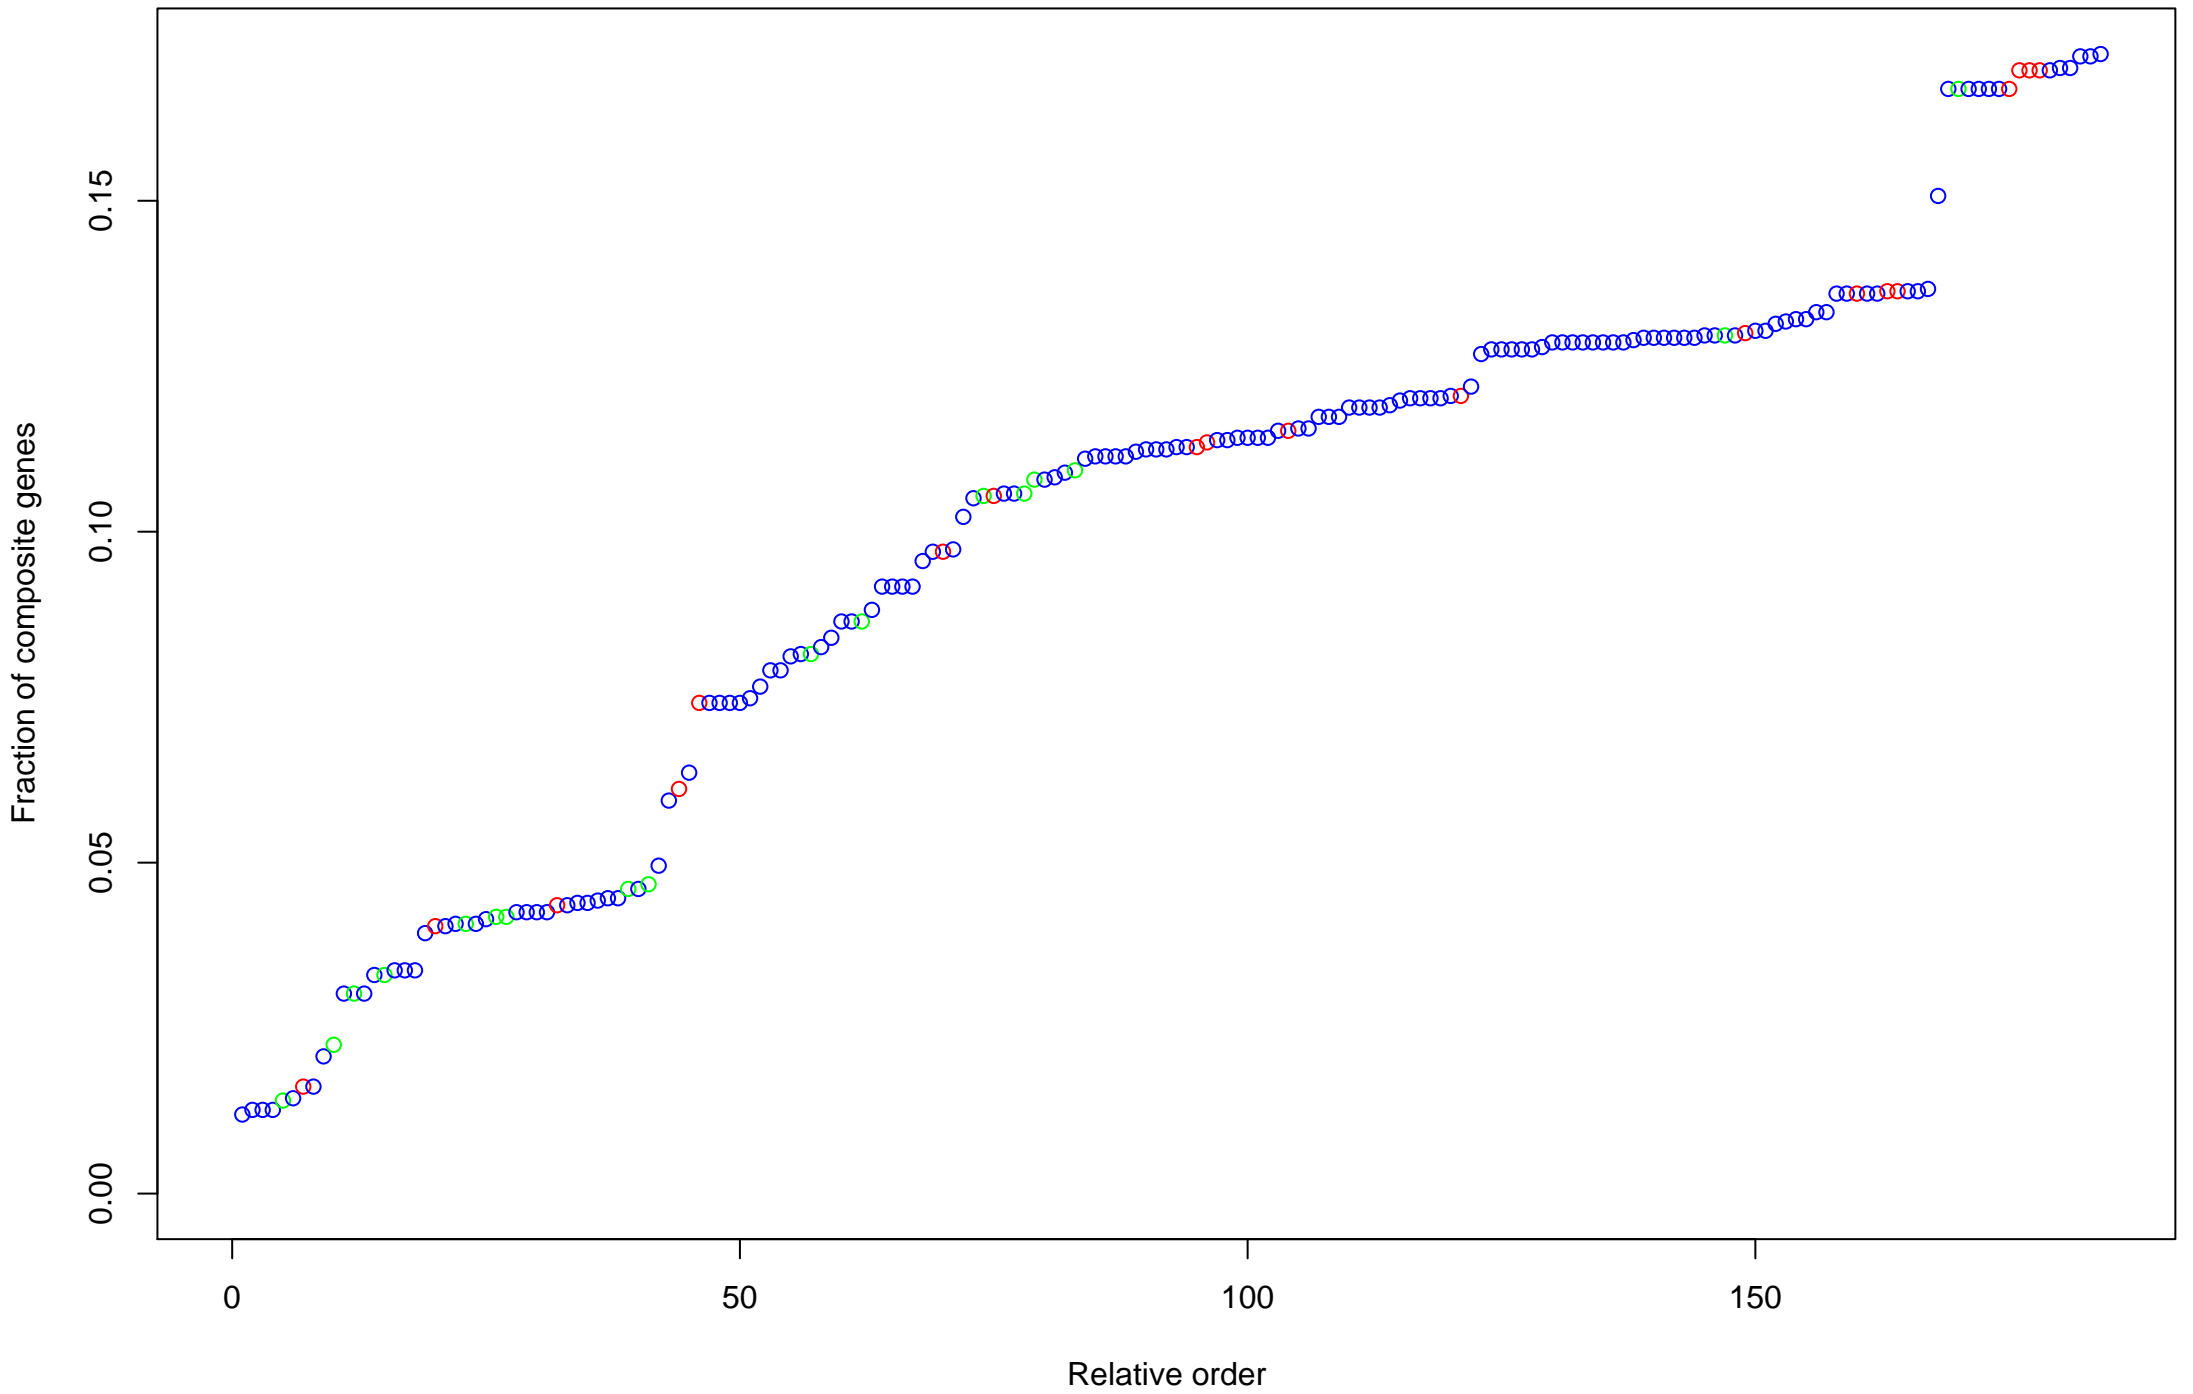

# NOST-PCC-01 (*Anabaena* sp.)

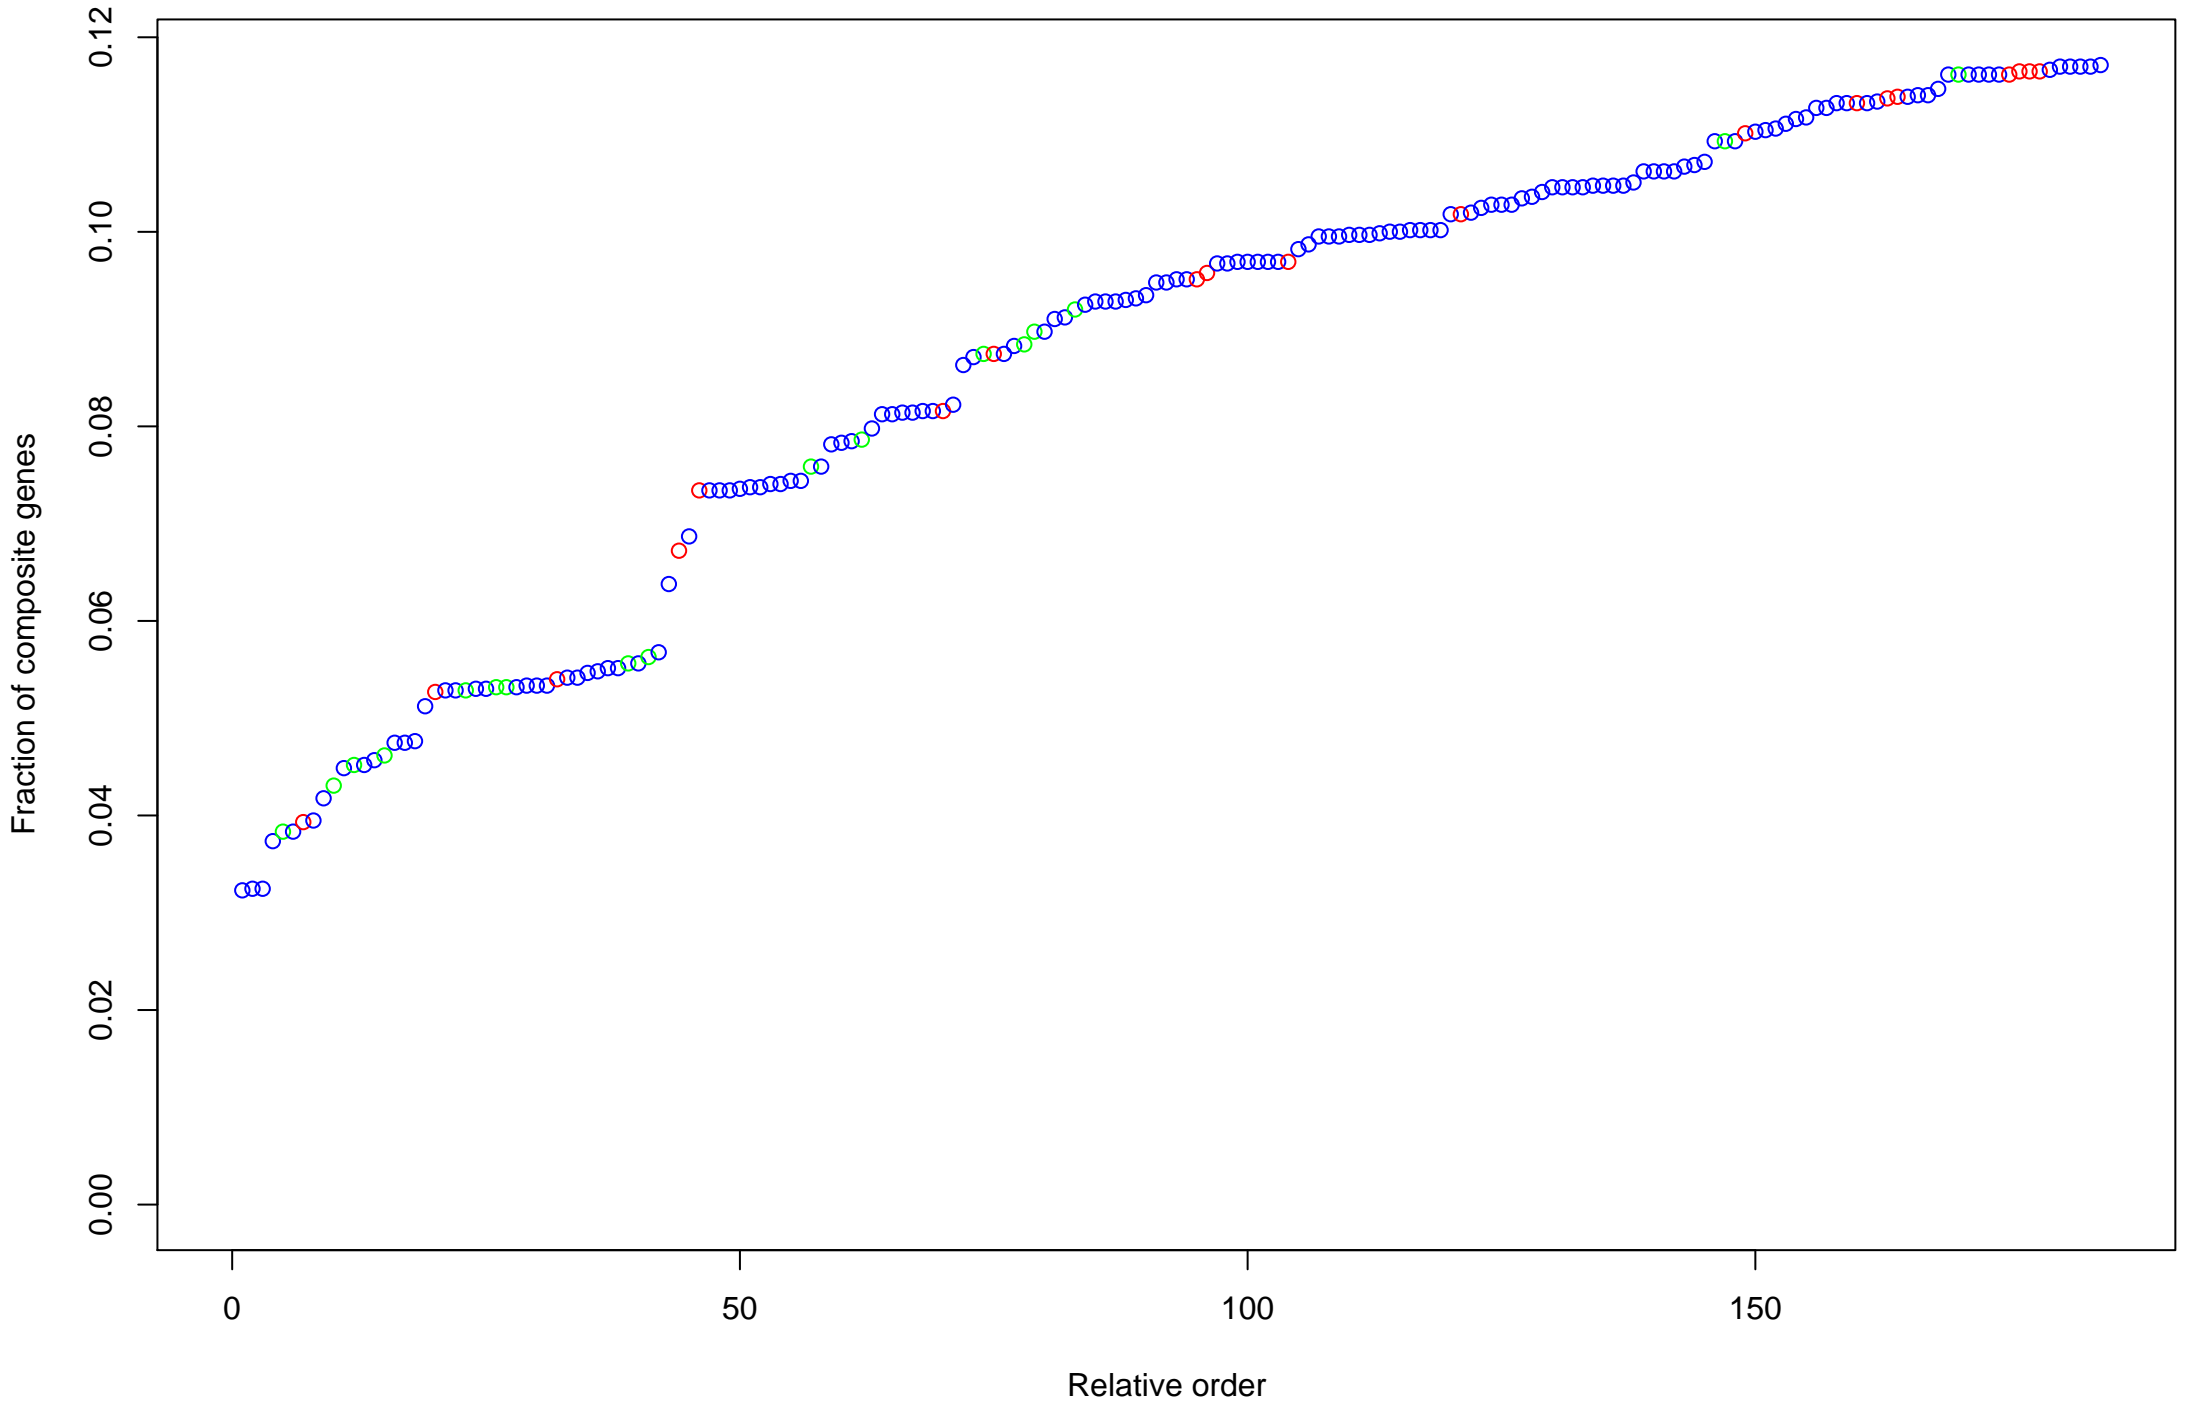

# ECUN-XXX-01 (Encephalitozoon cuniculi)

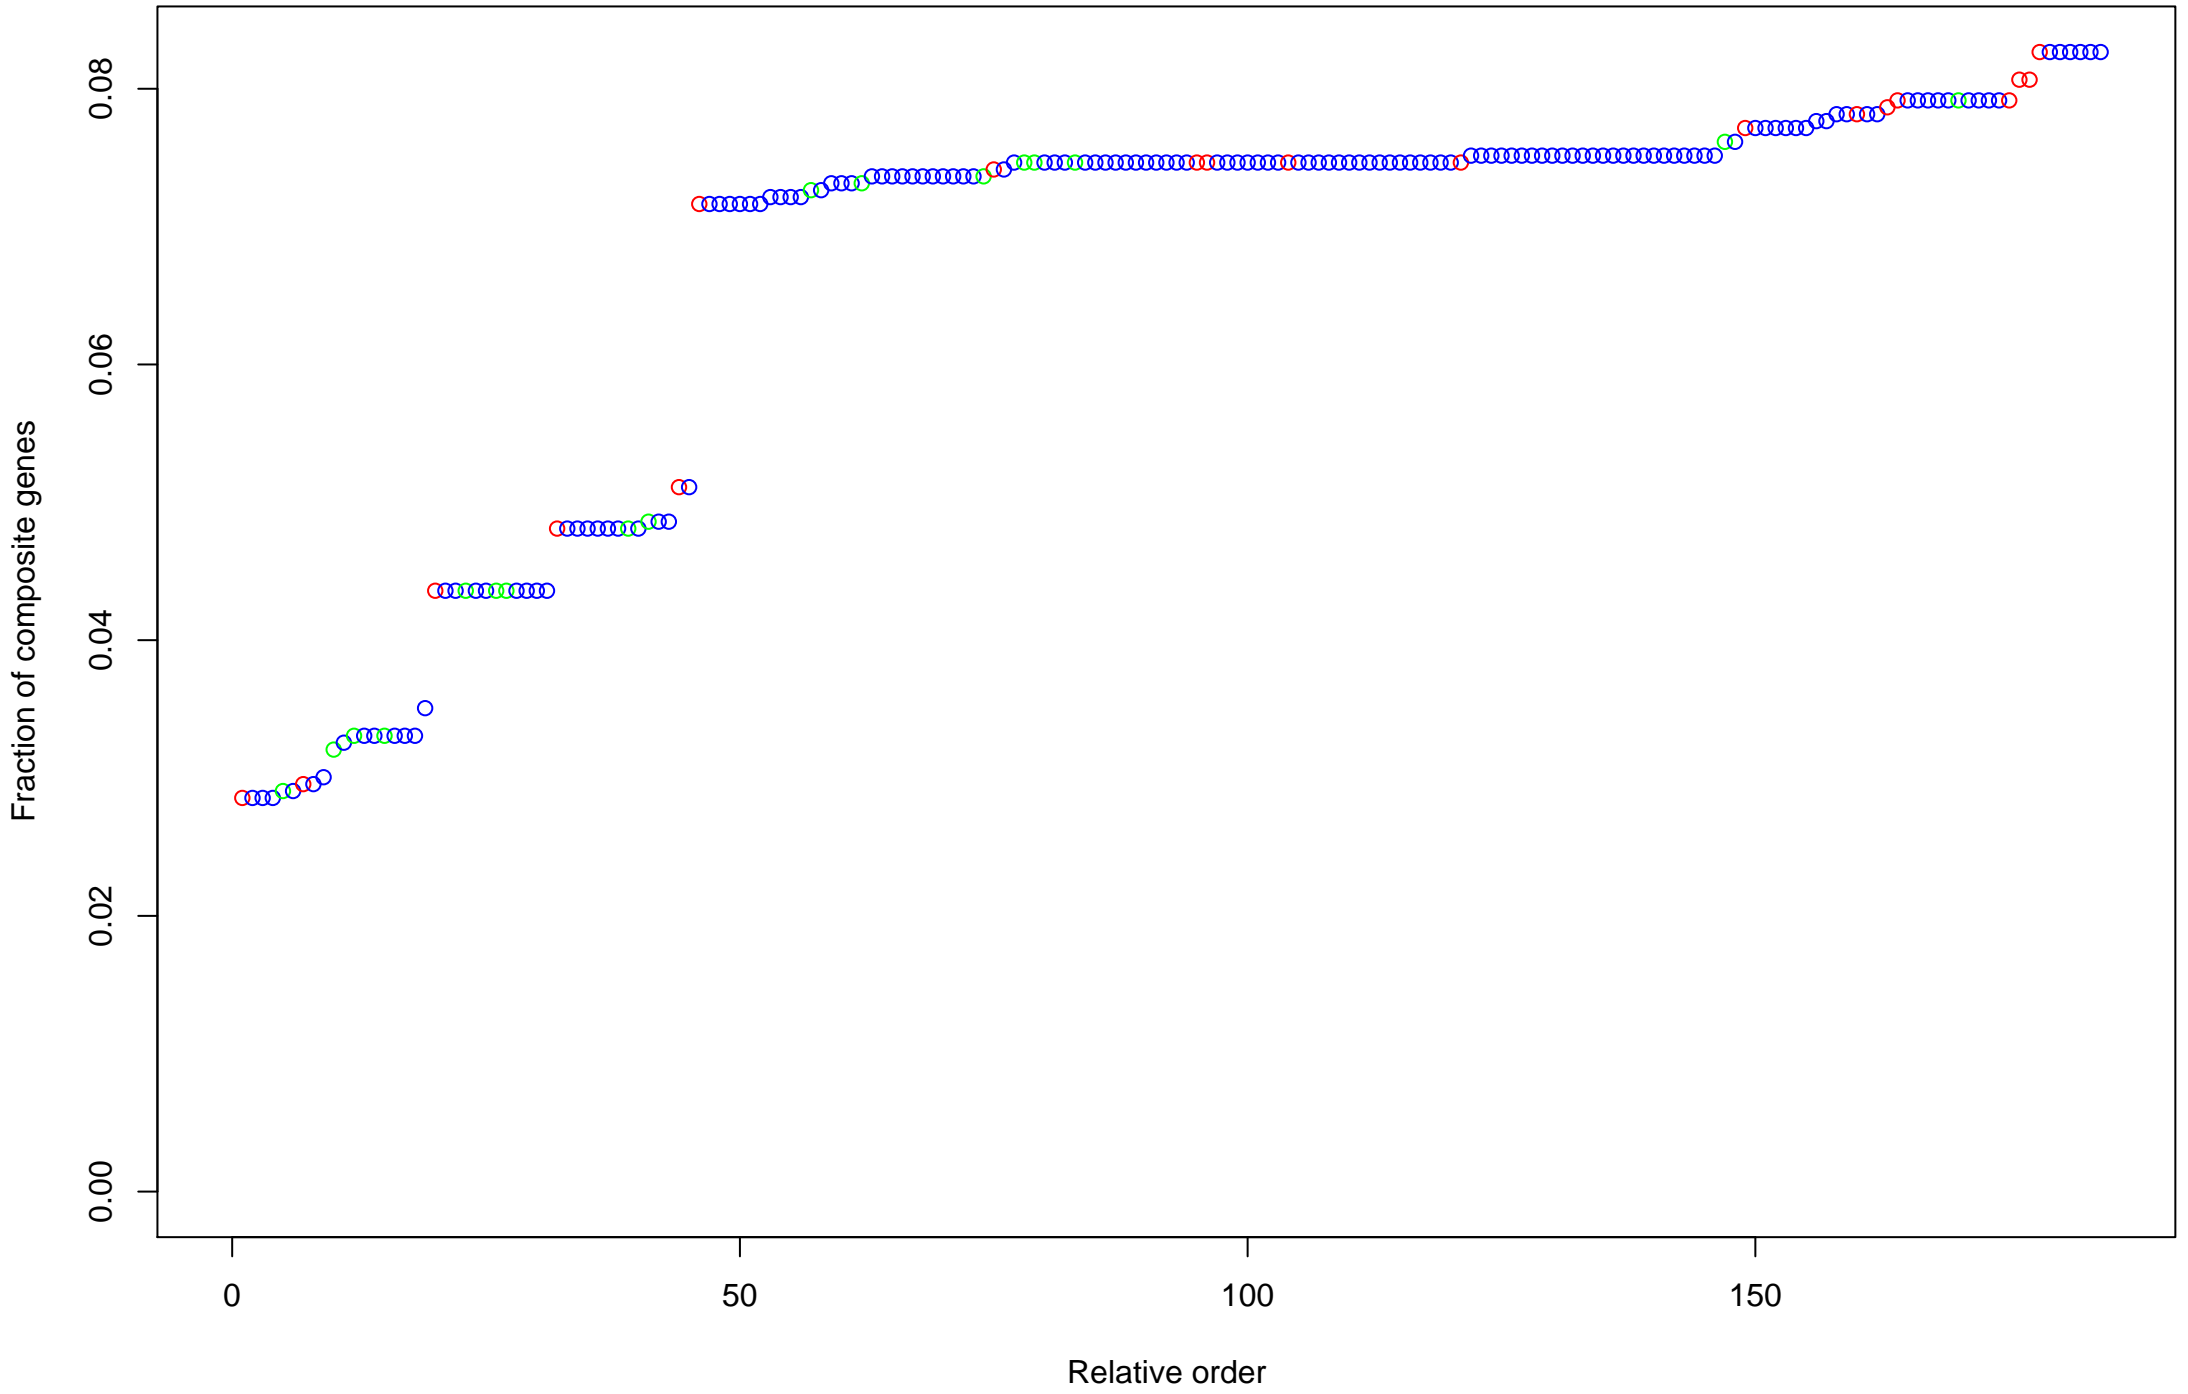

# RSOL-XXX-01 (*Ralstonia solanacearum*)

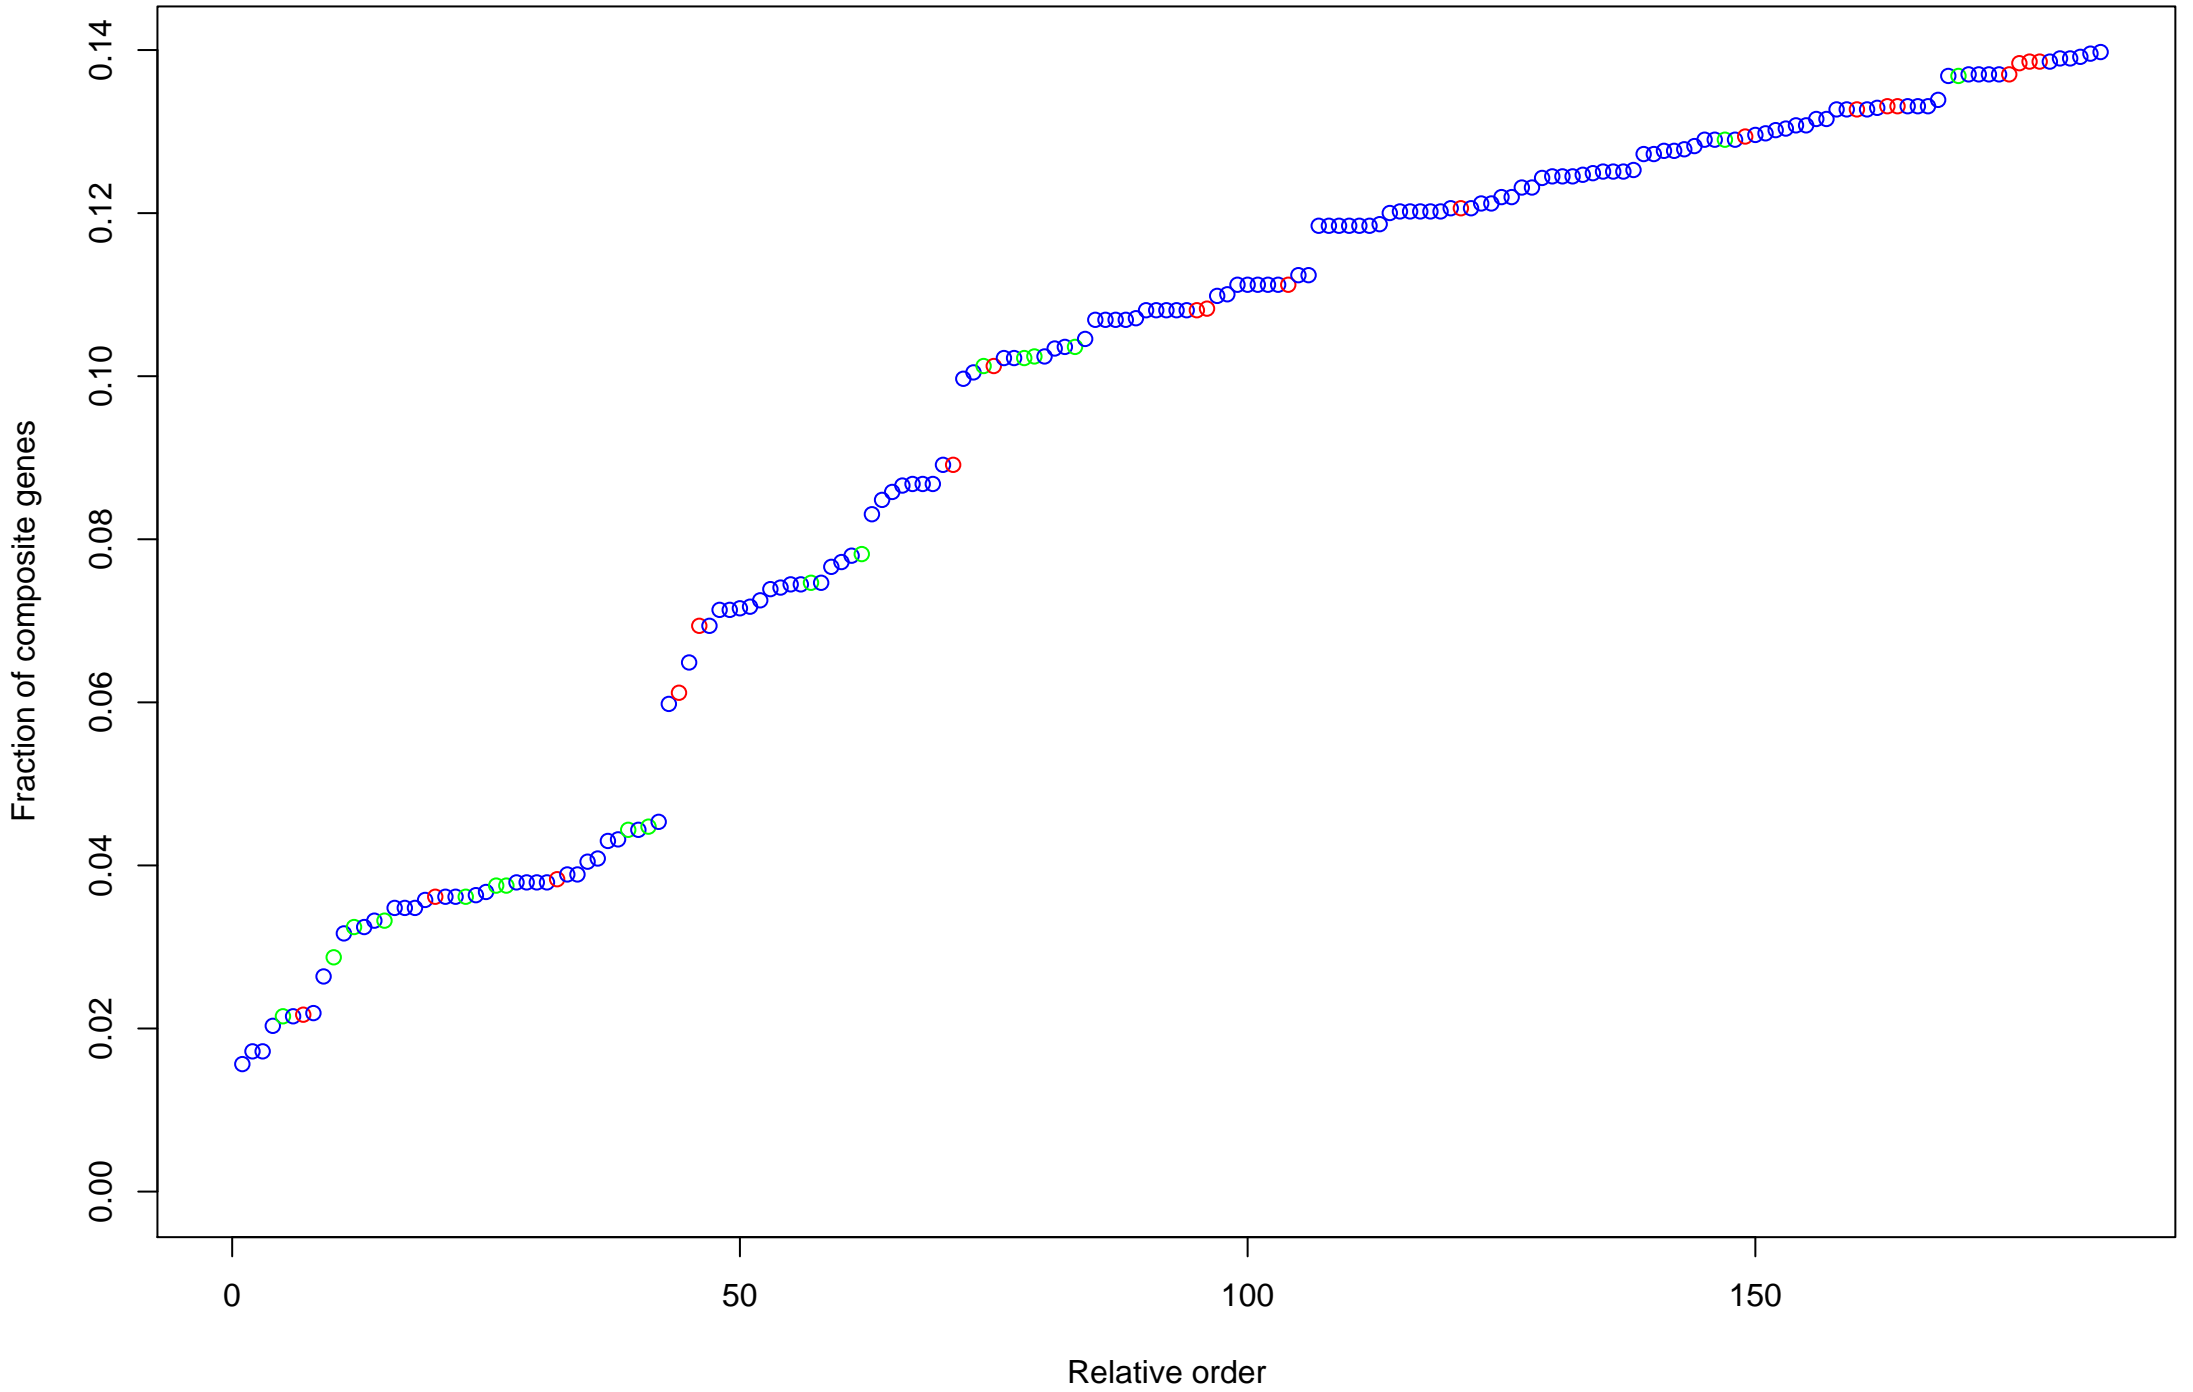

# BMEL-M16-01 (*Brucella melitensis*)

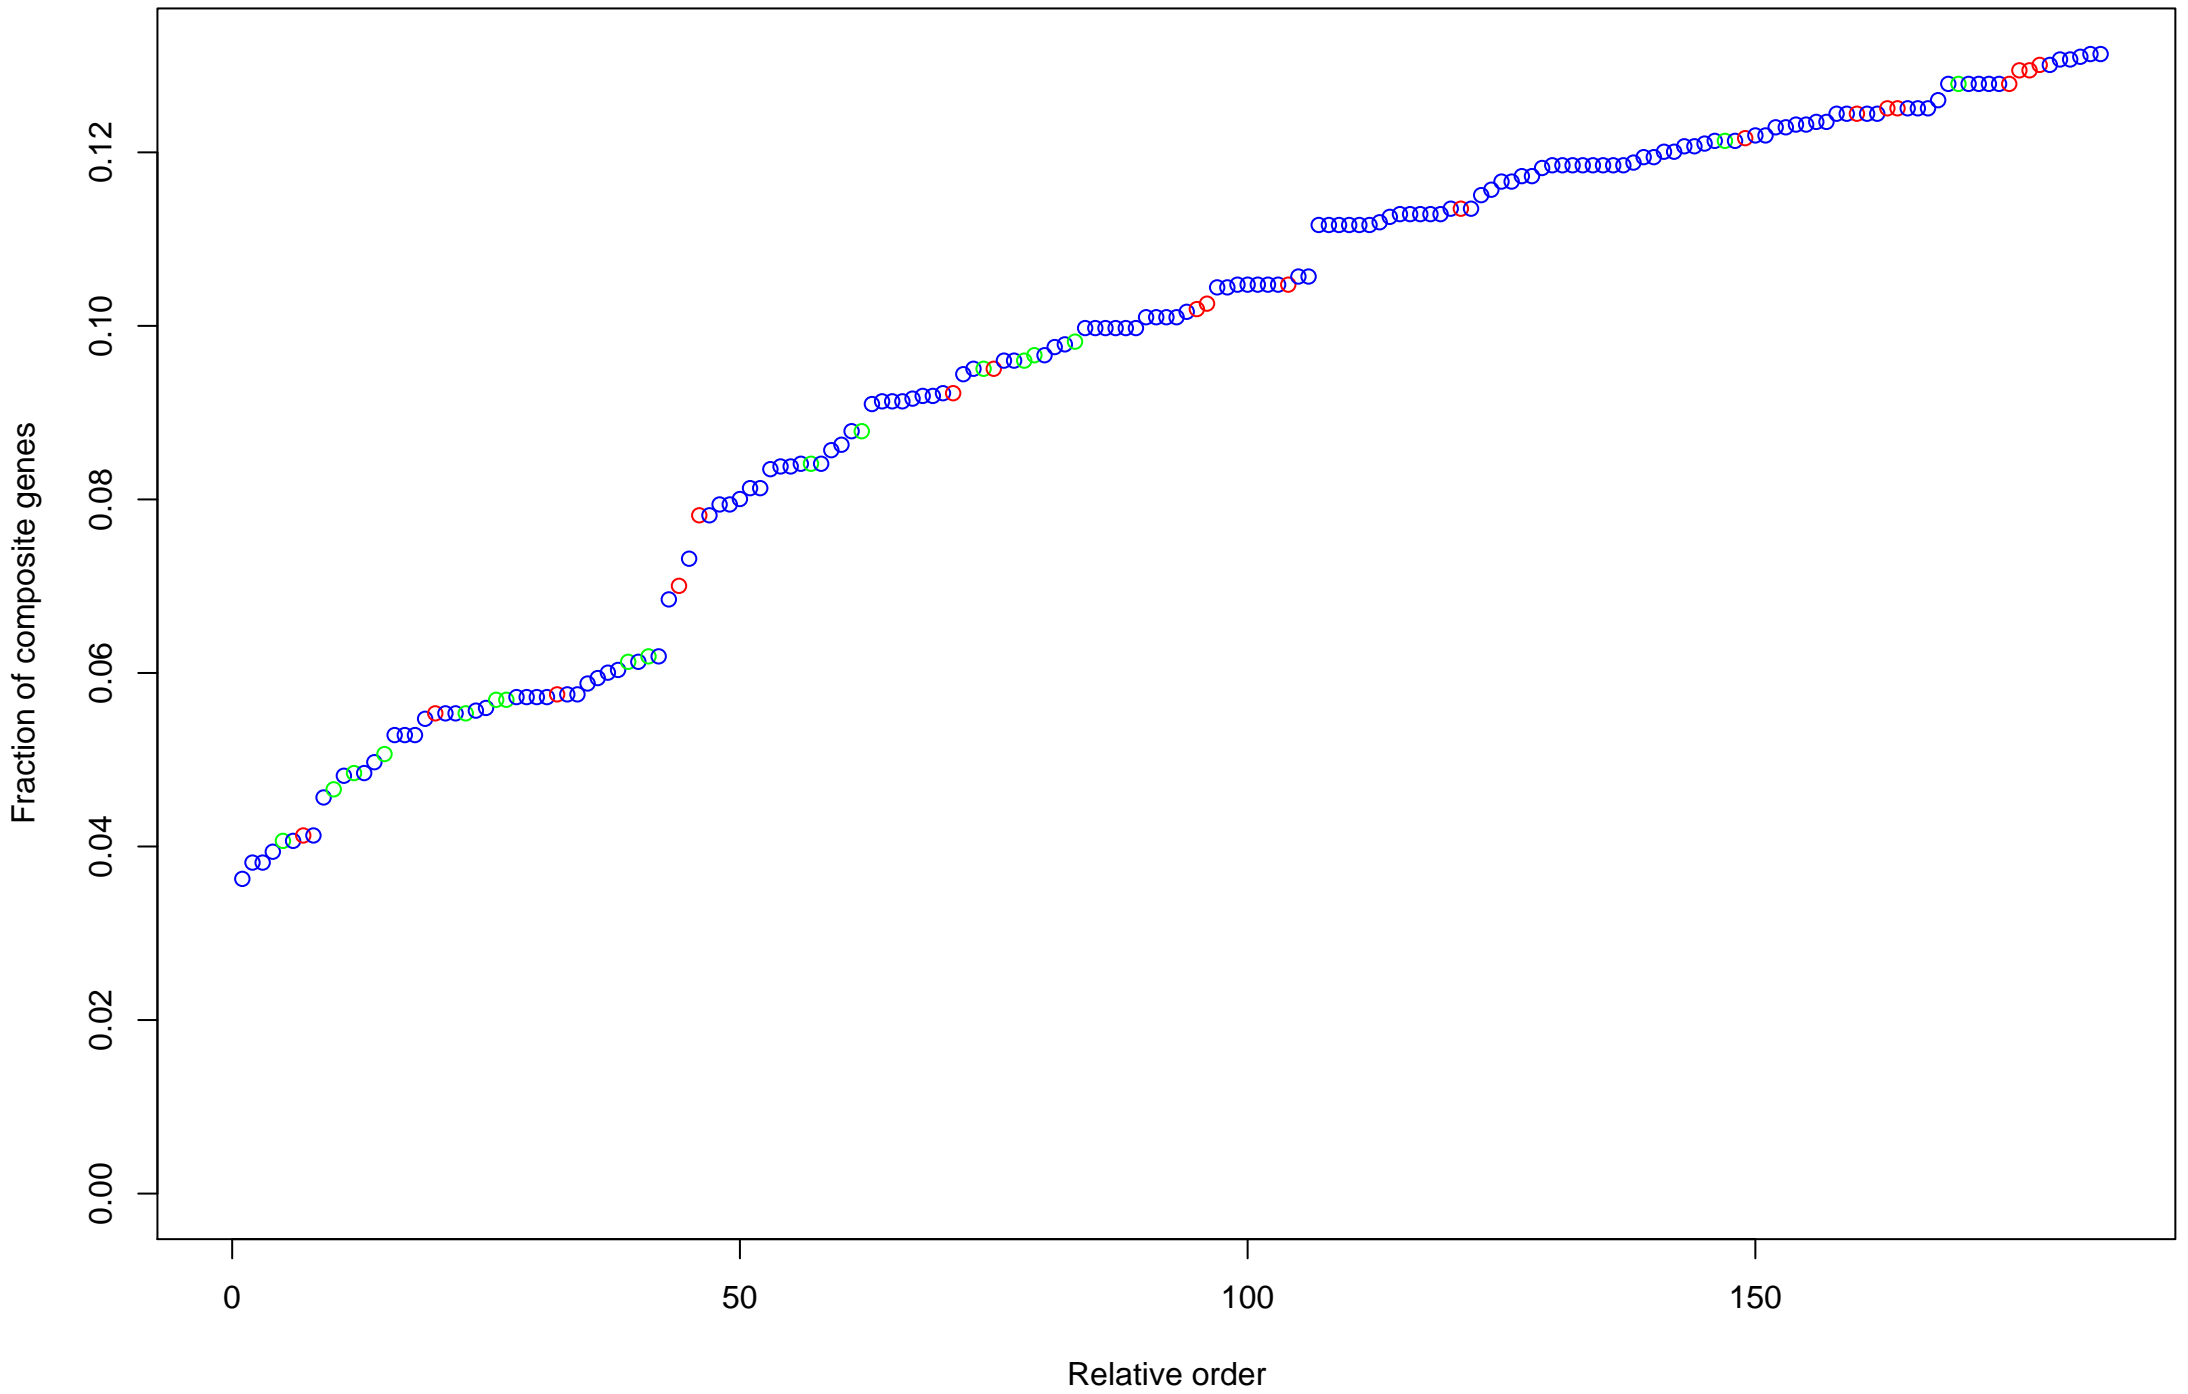



# CPER-X13-01 (*Clostridium perfringens*)

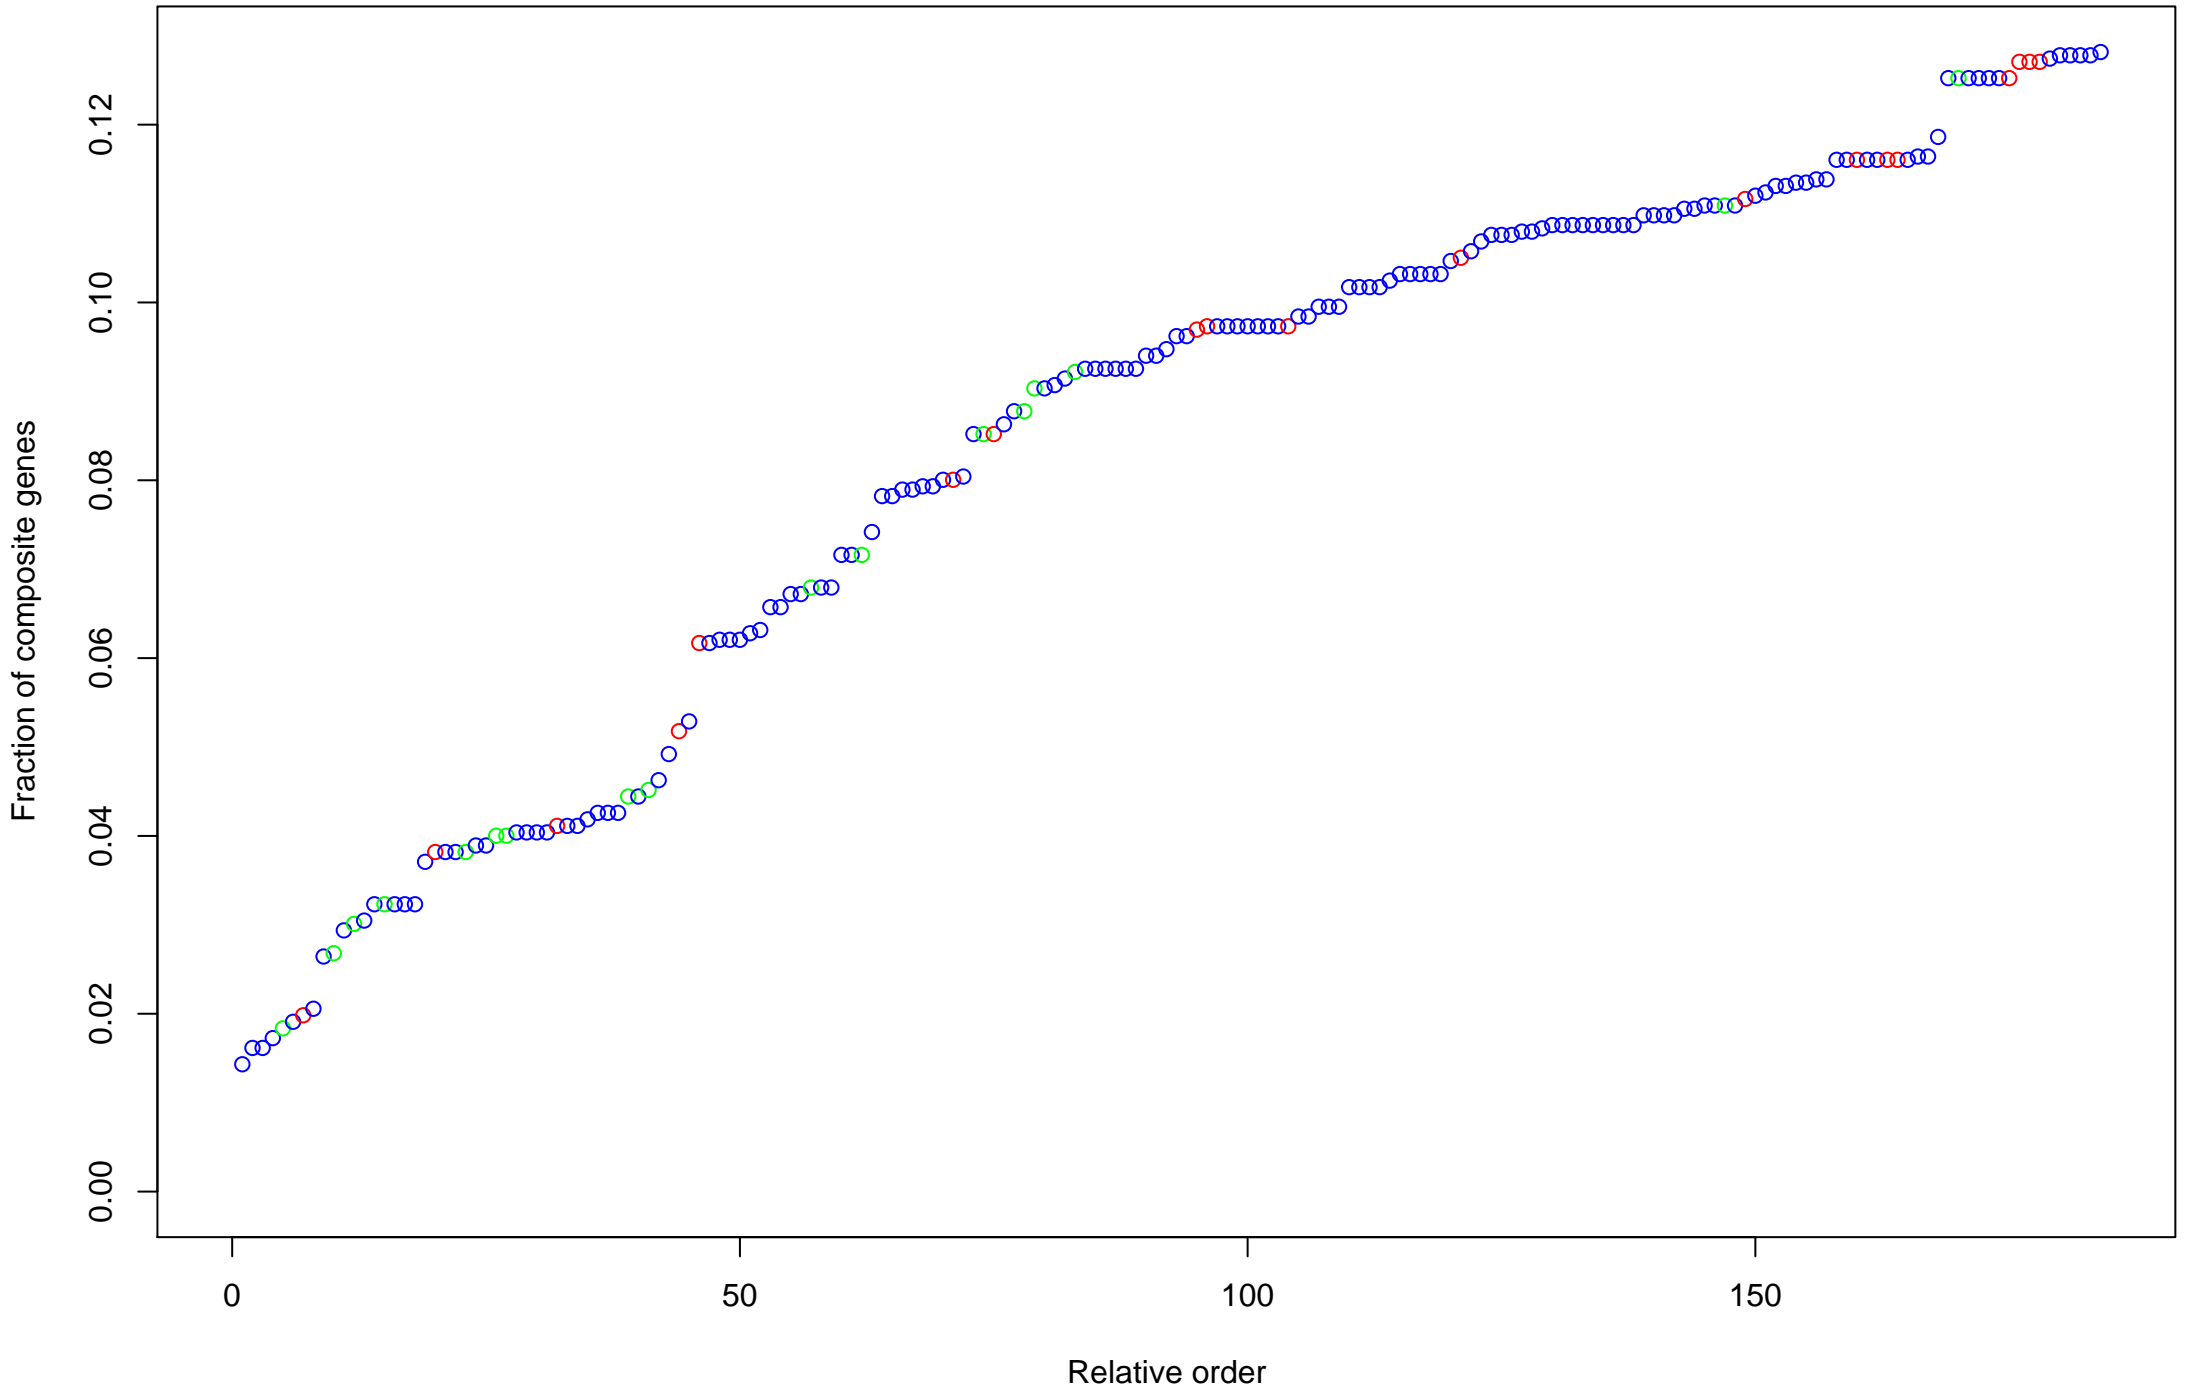

# PAER-IM2-01 (*Pyrobaculum aerophilum*)

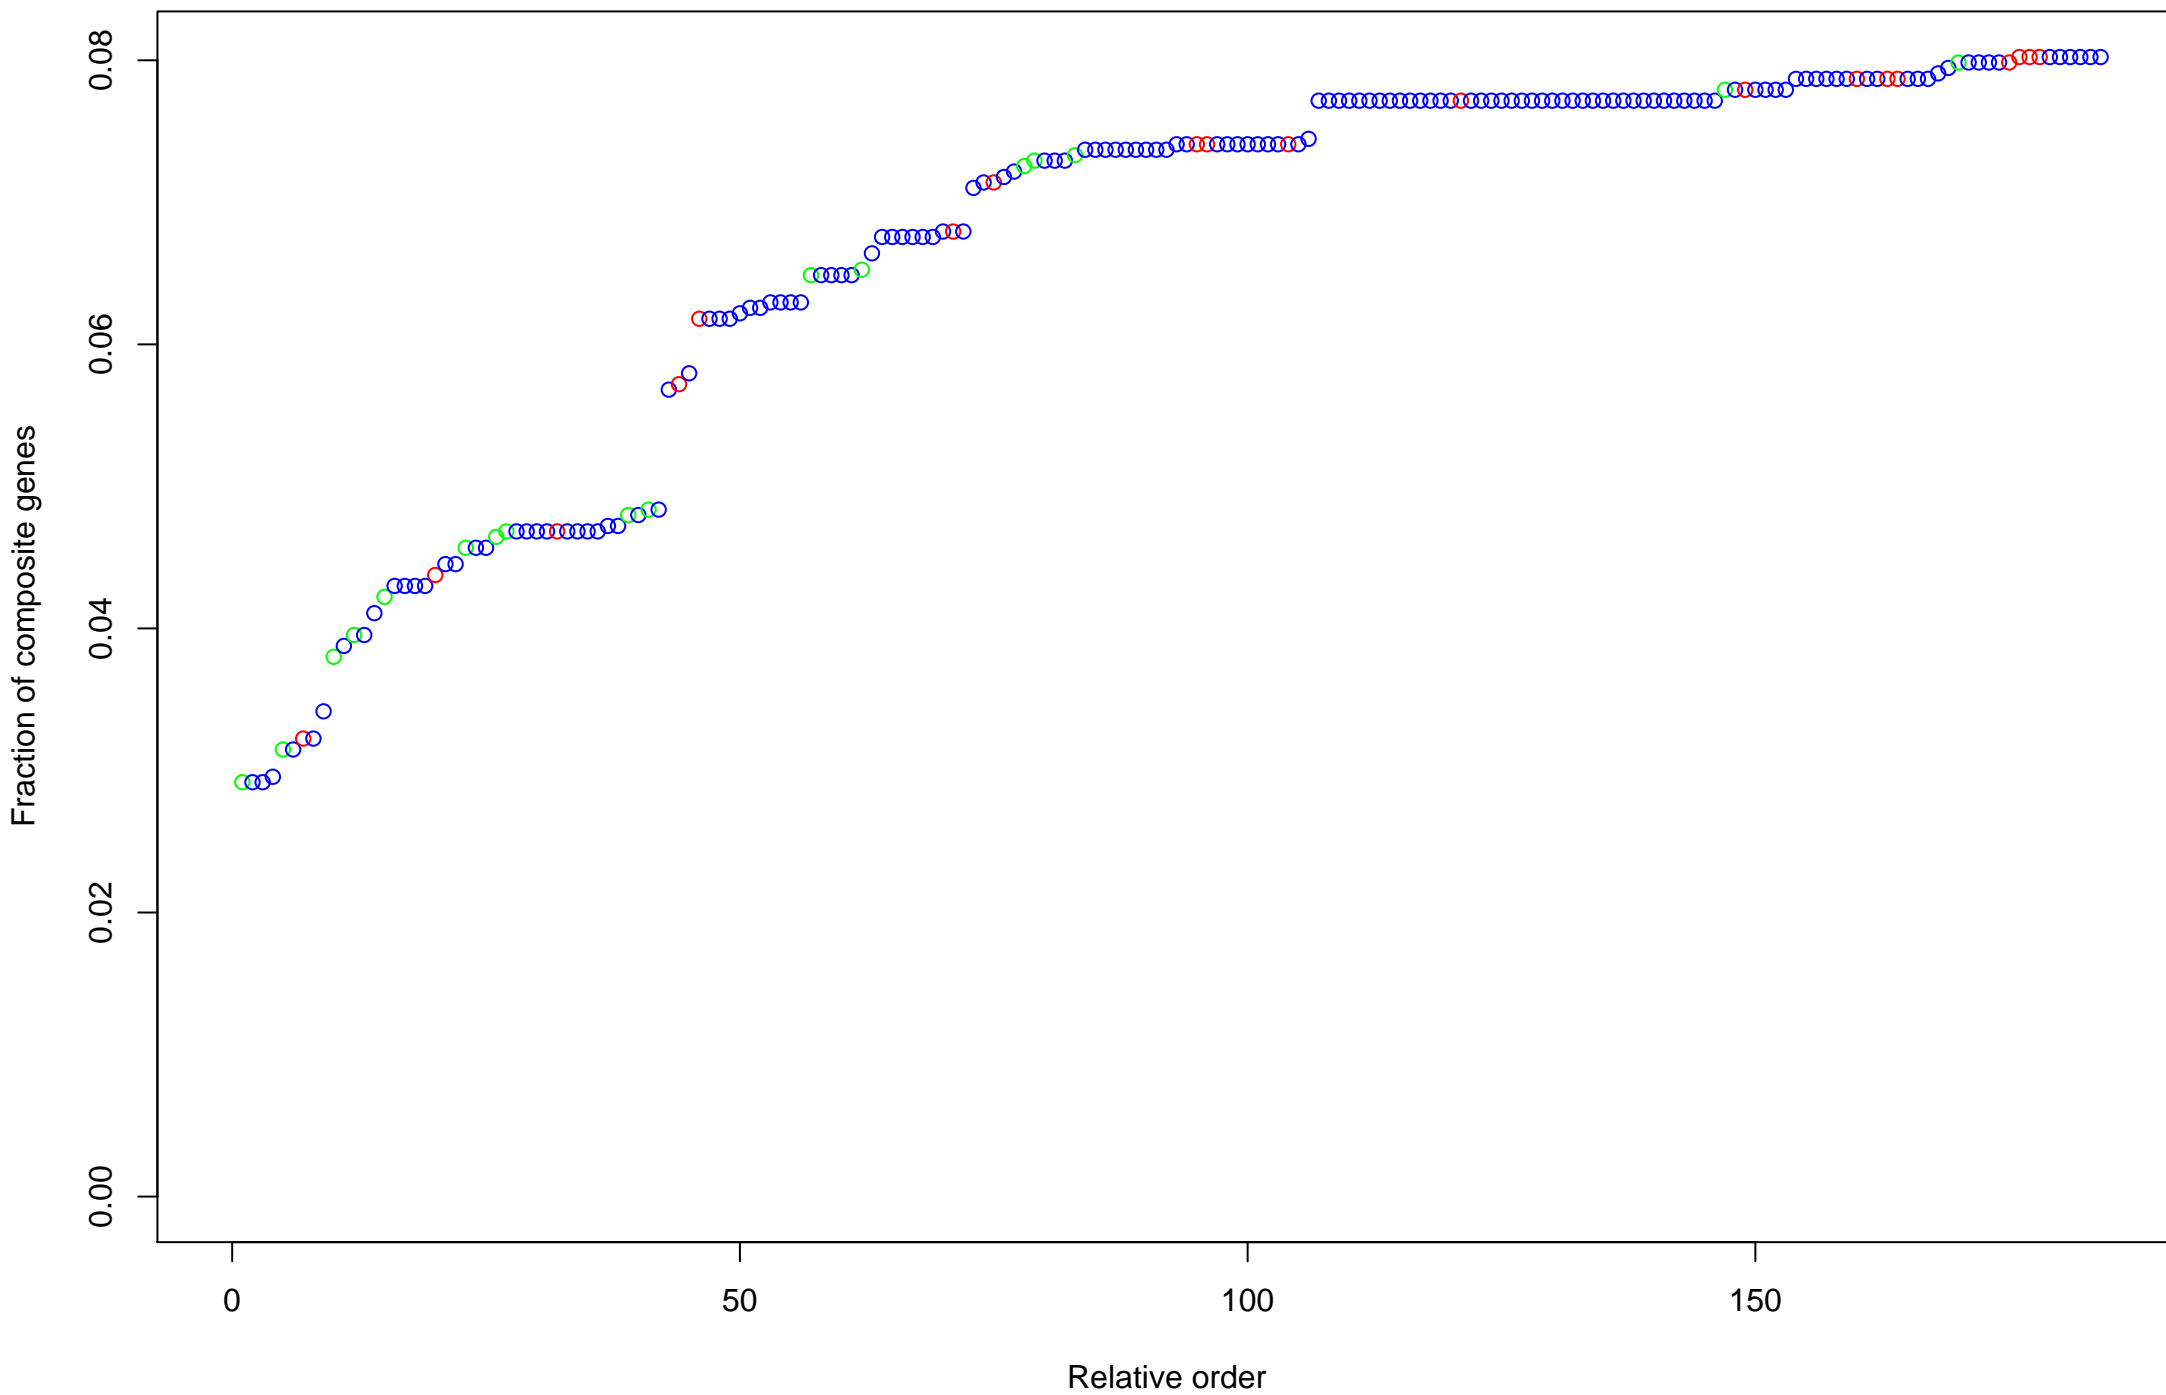

# SPOM-XXX-01 (*Schizosaccharomyces pombe*)

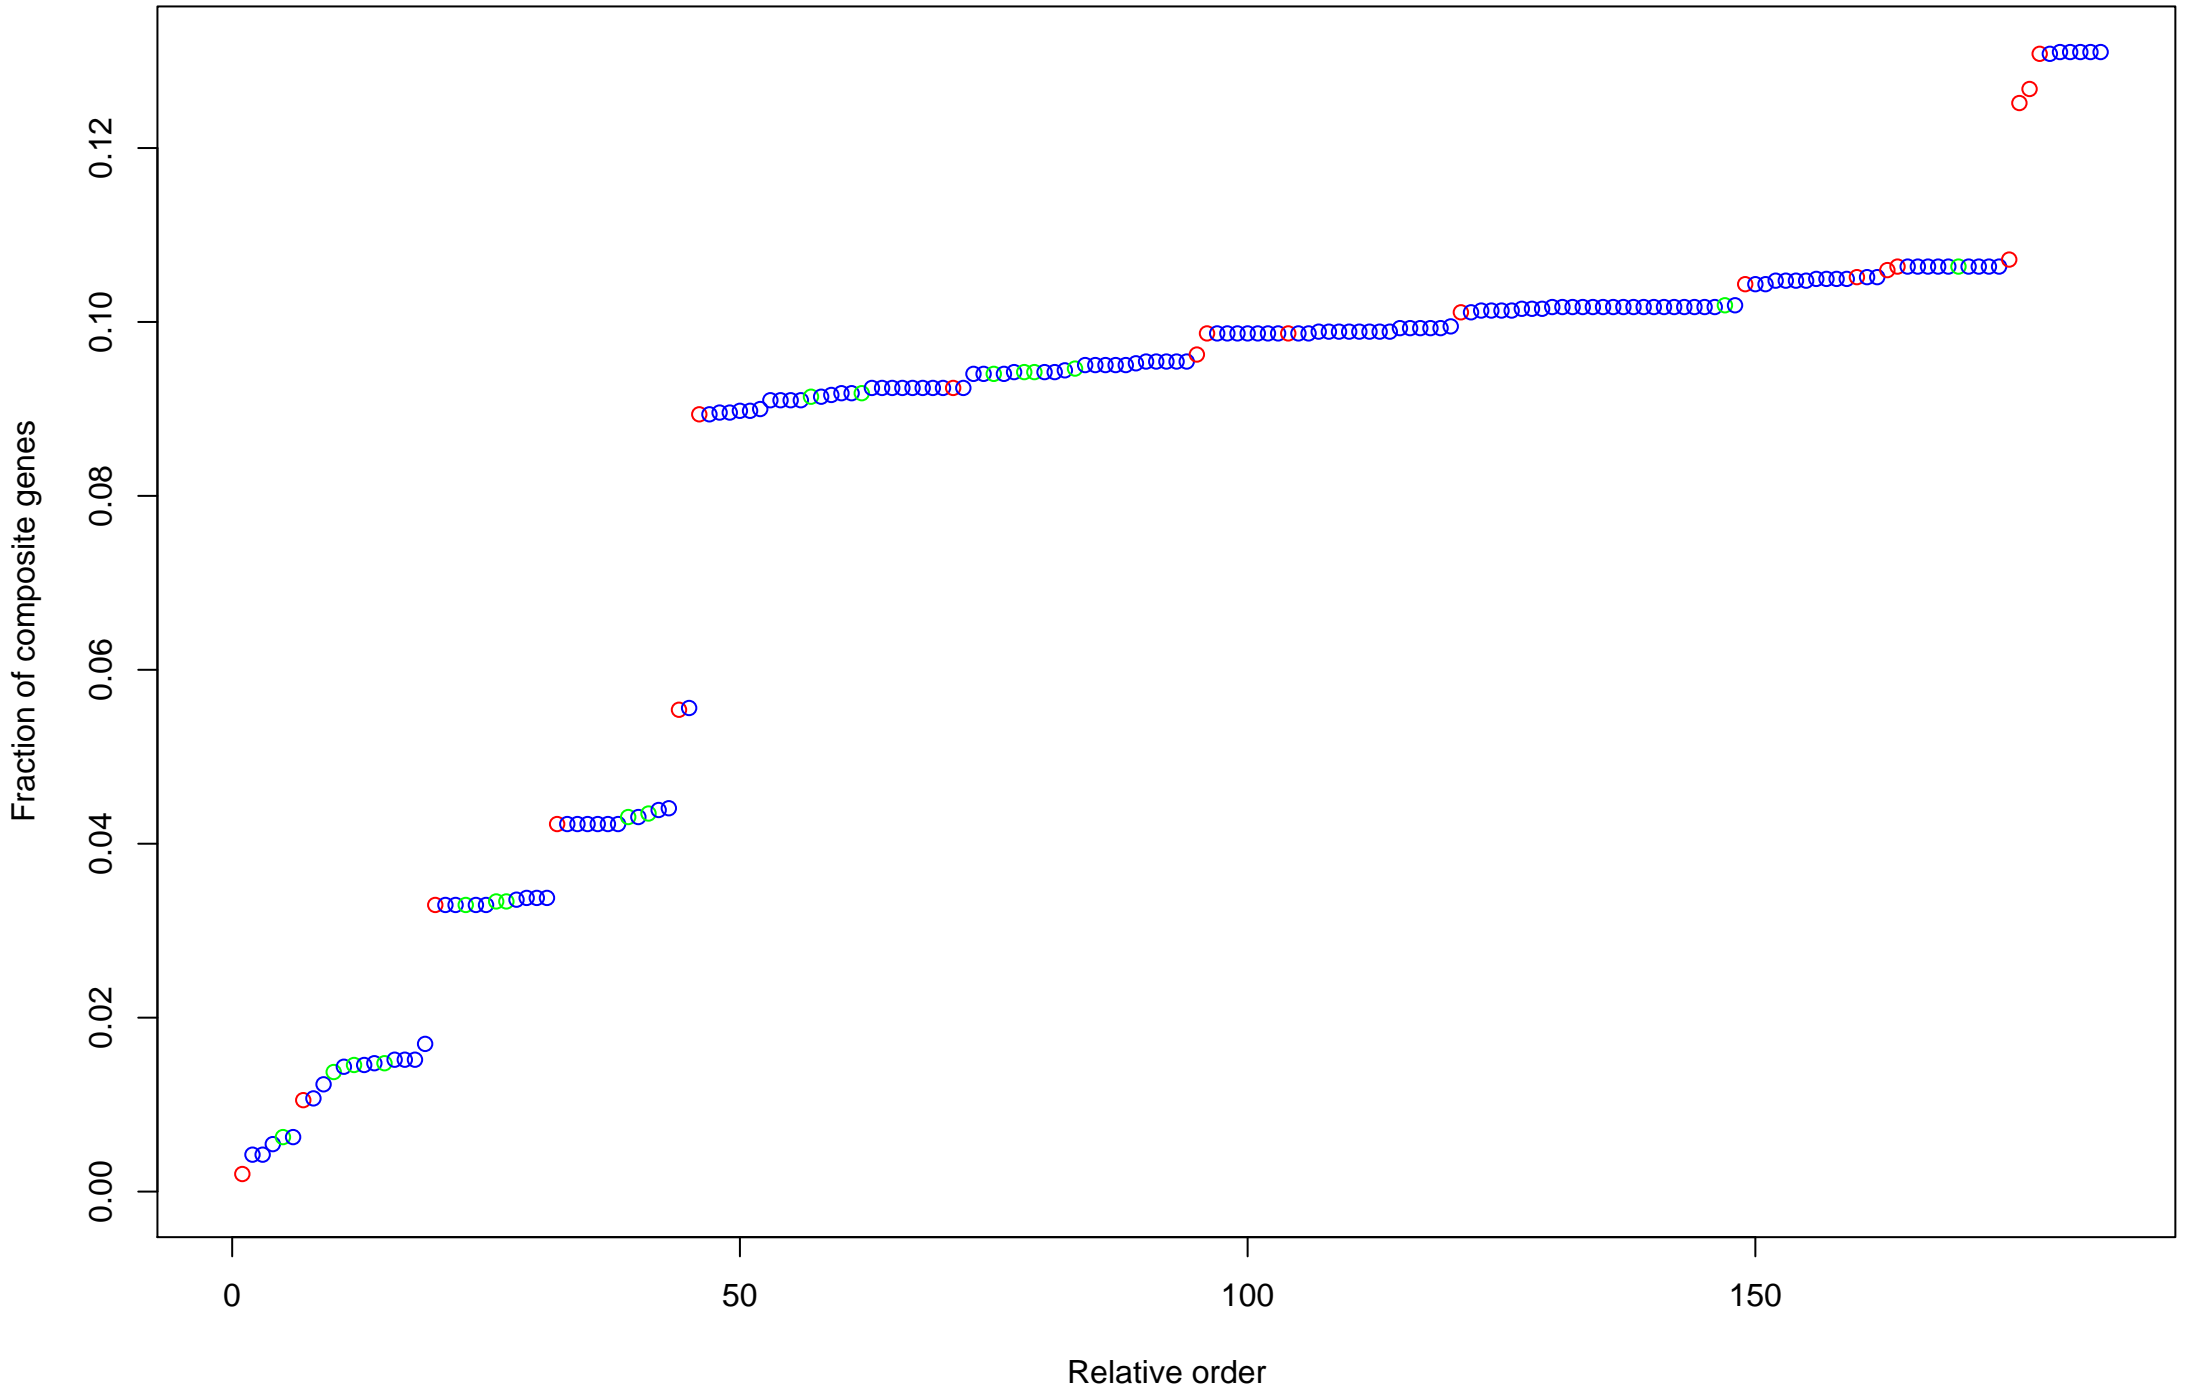

# CGLU-XXX-01 (*Corynebacterium glutamicum*)

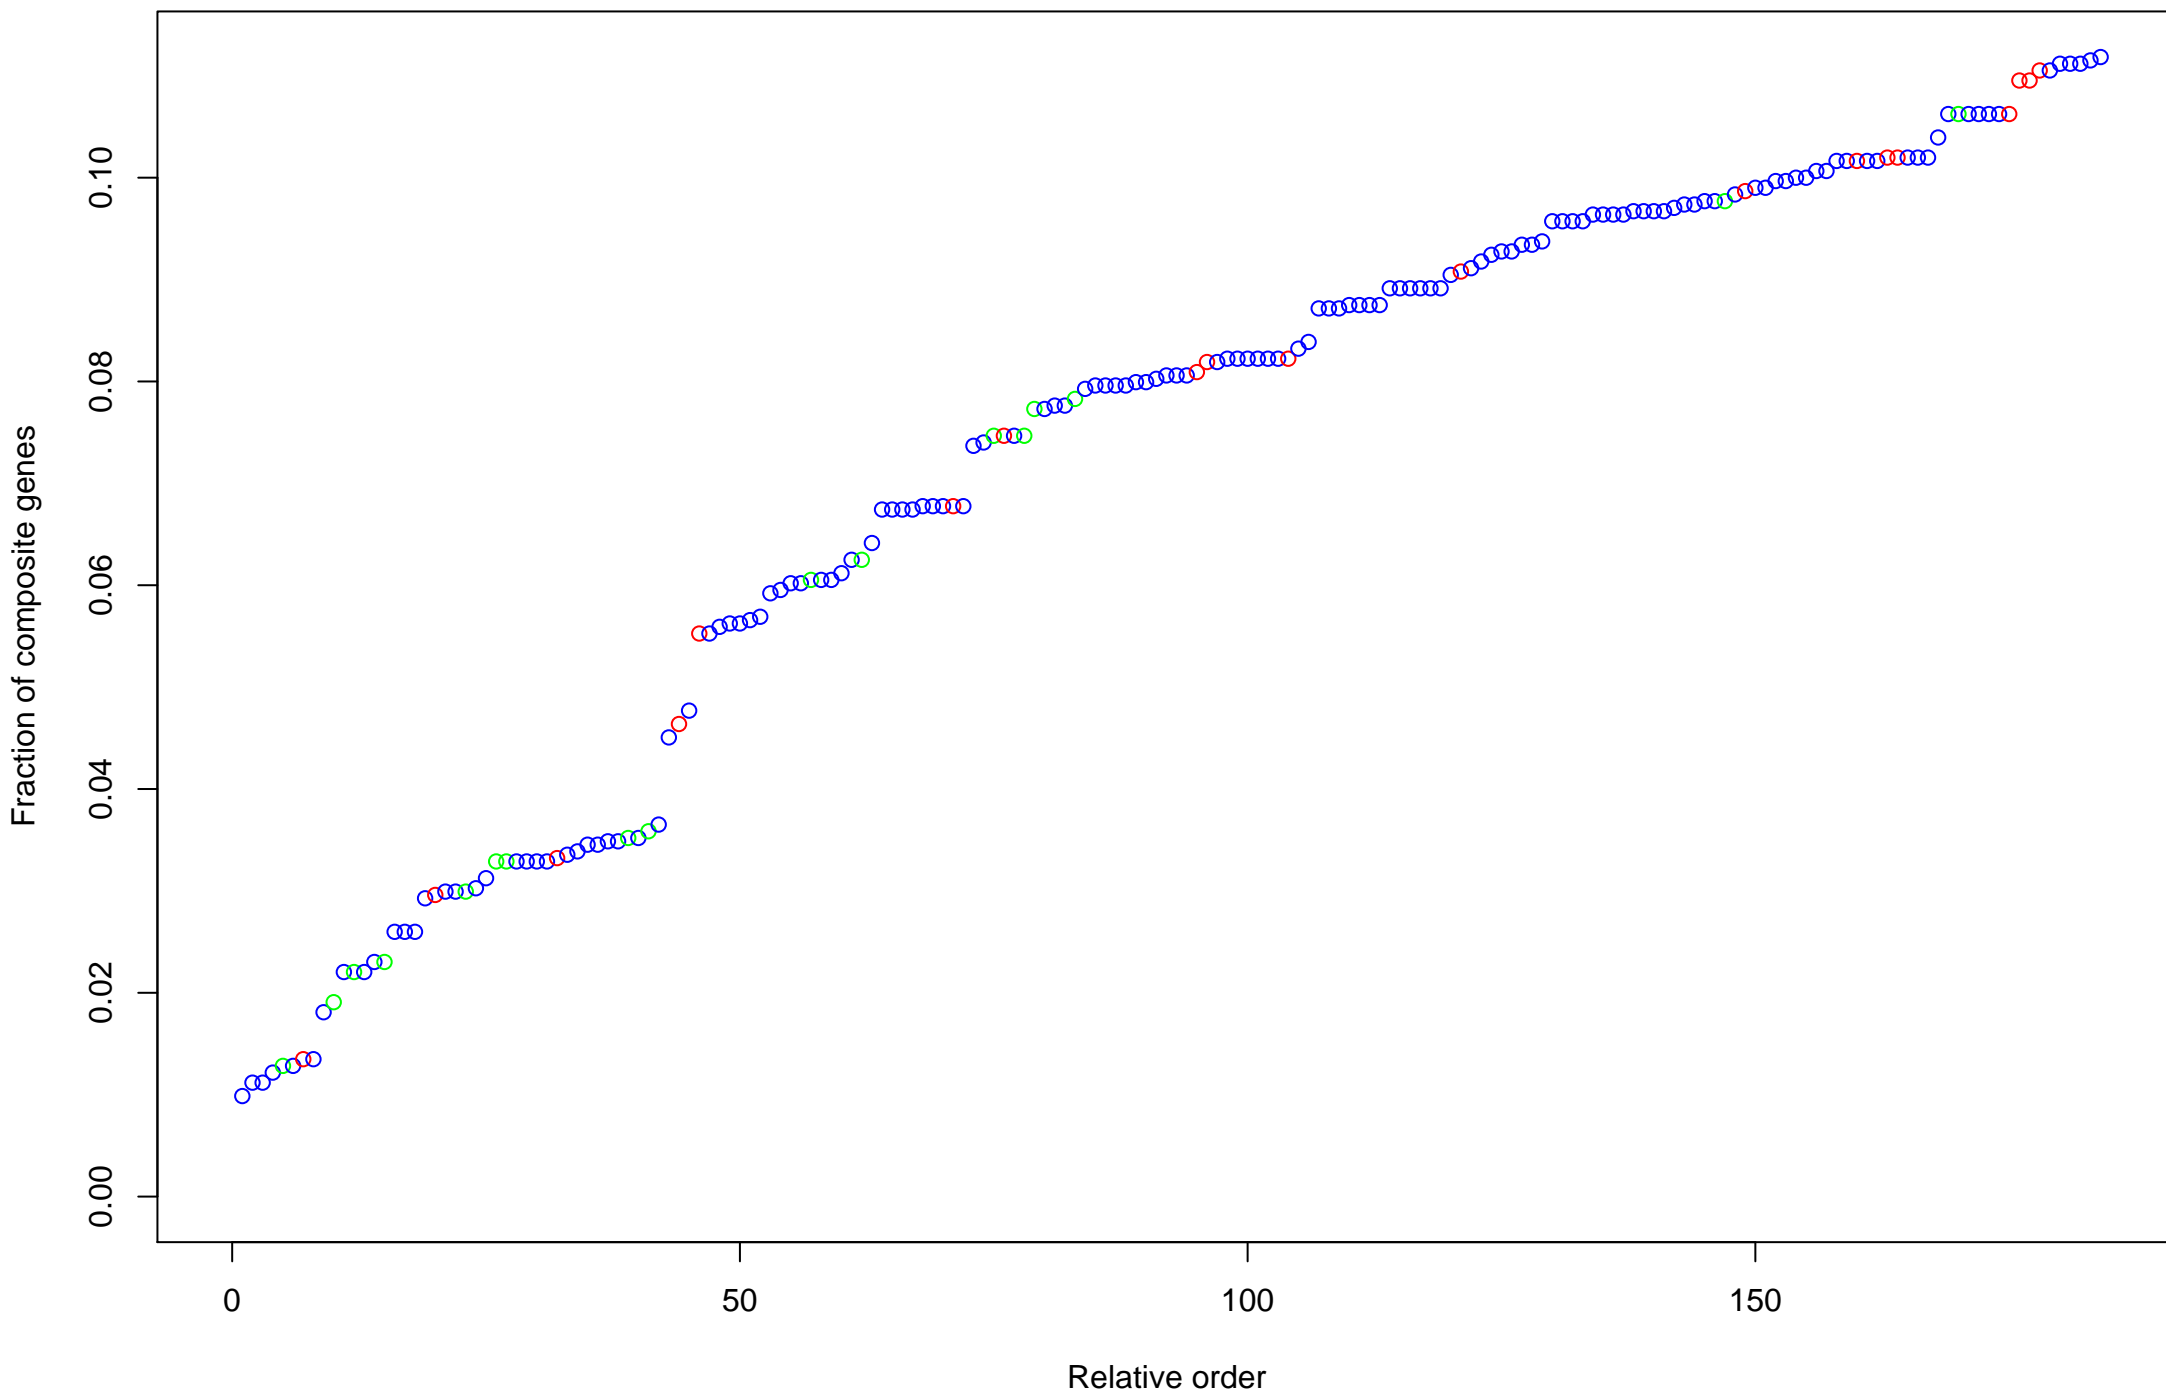

# FNUC-ATC-01 (*Fusobacterium nucleatum*)

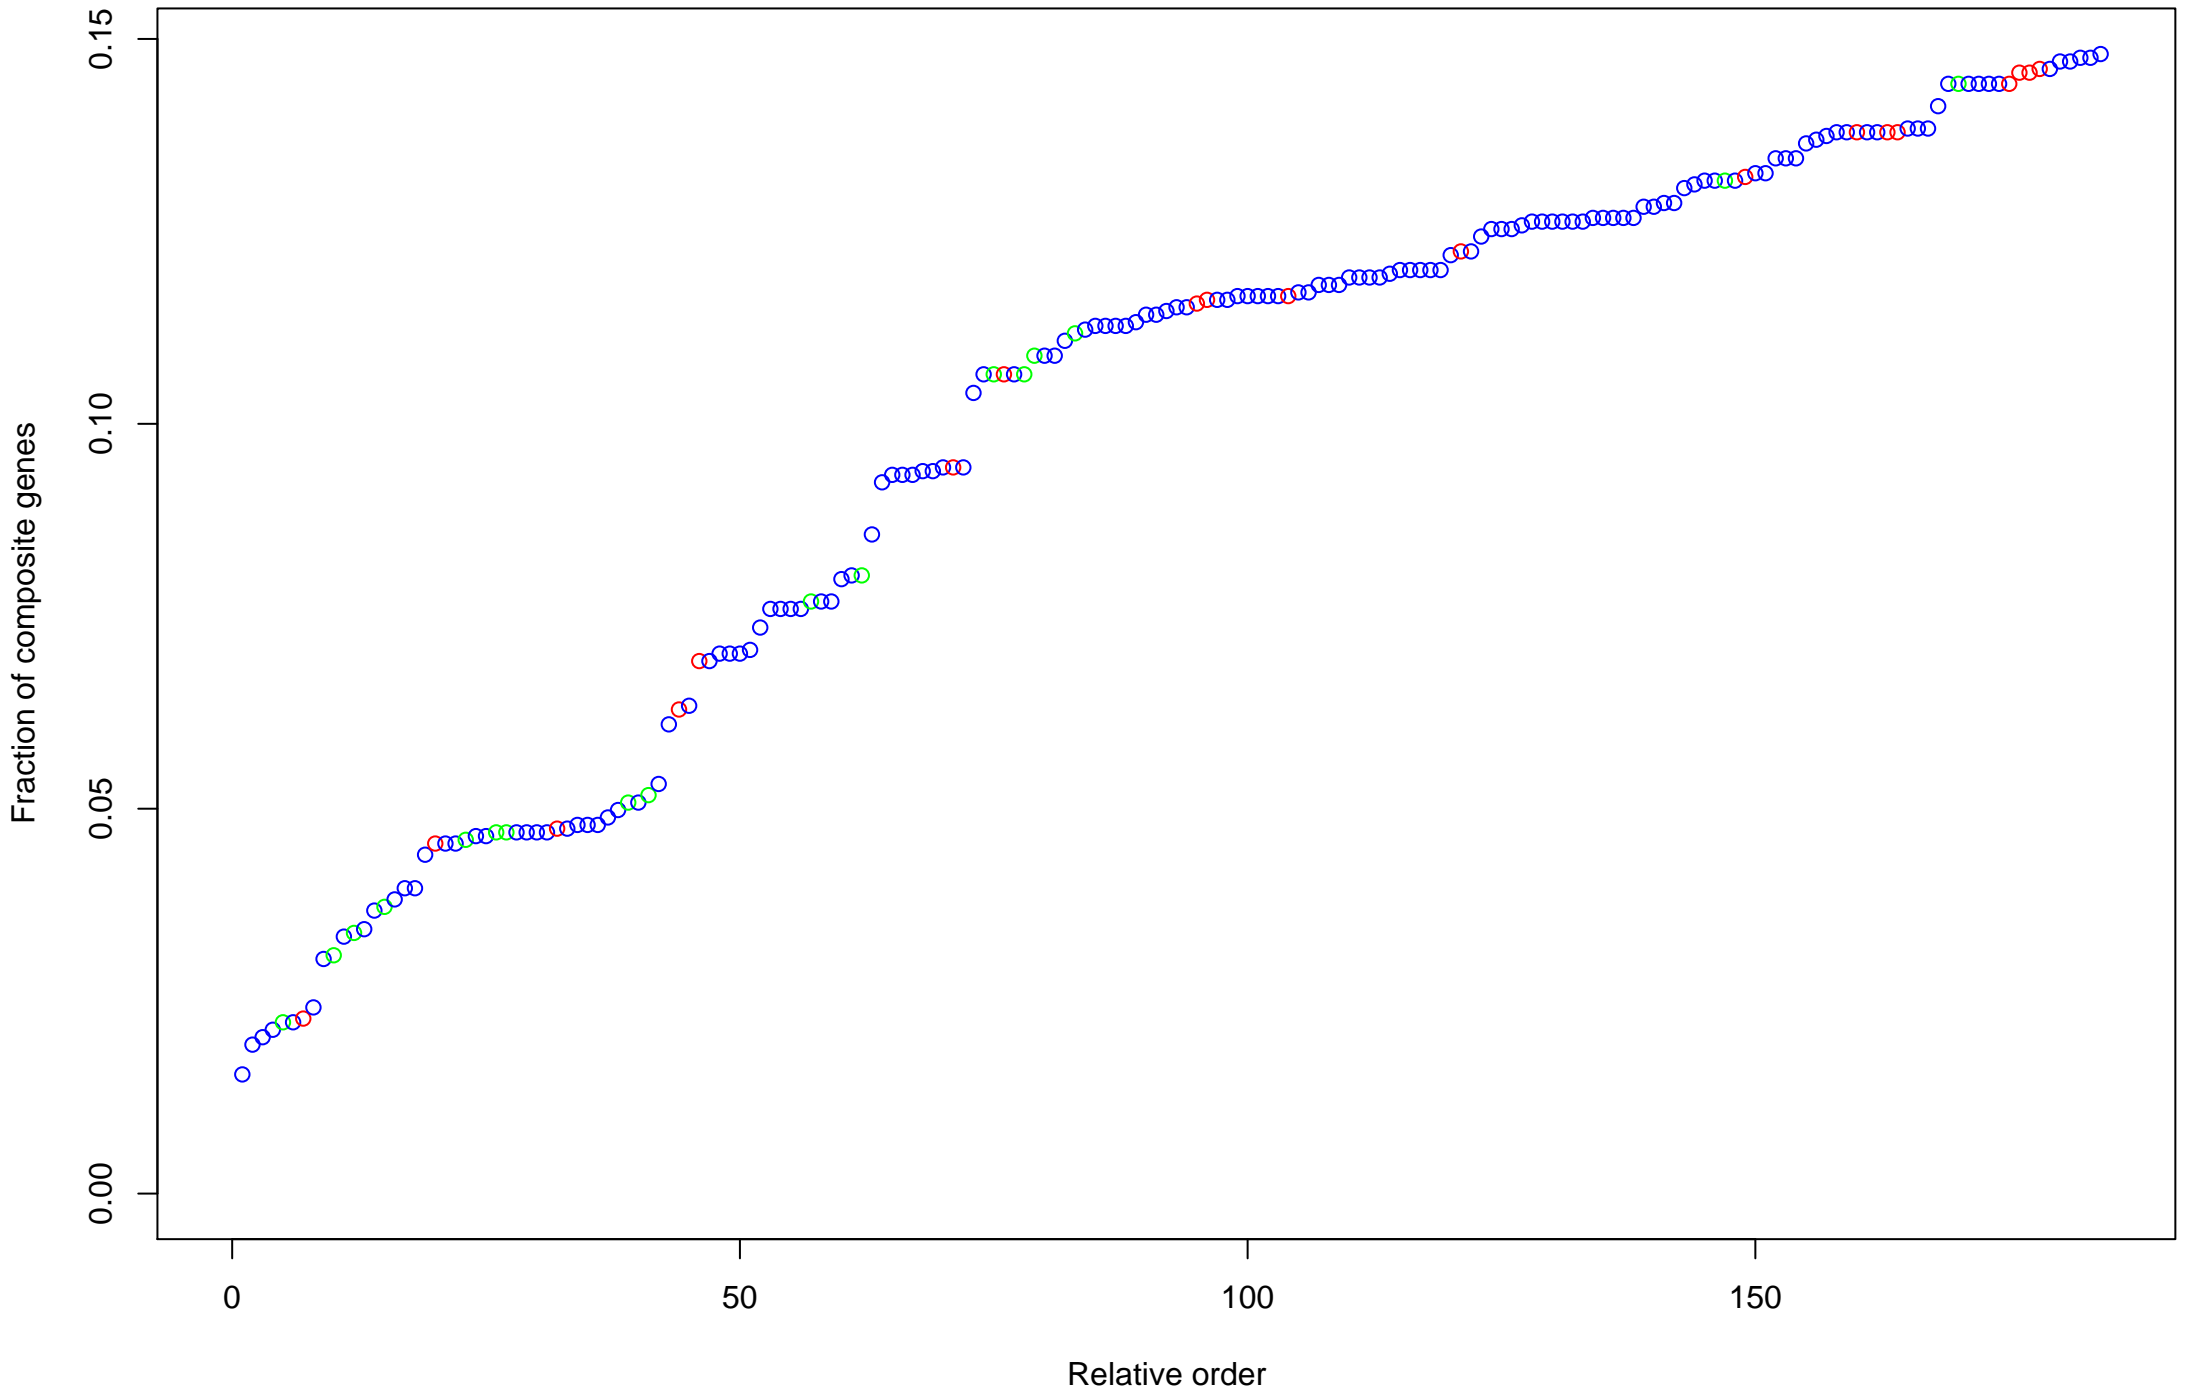

# MKAN-AV1-01 (*Methanopyrus kandleri*)

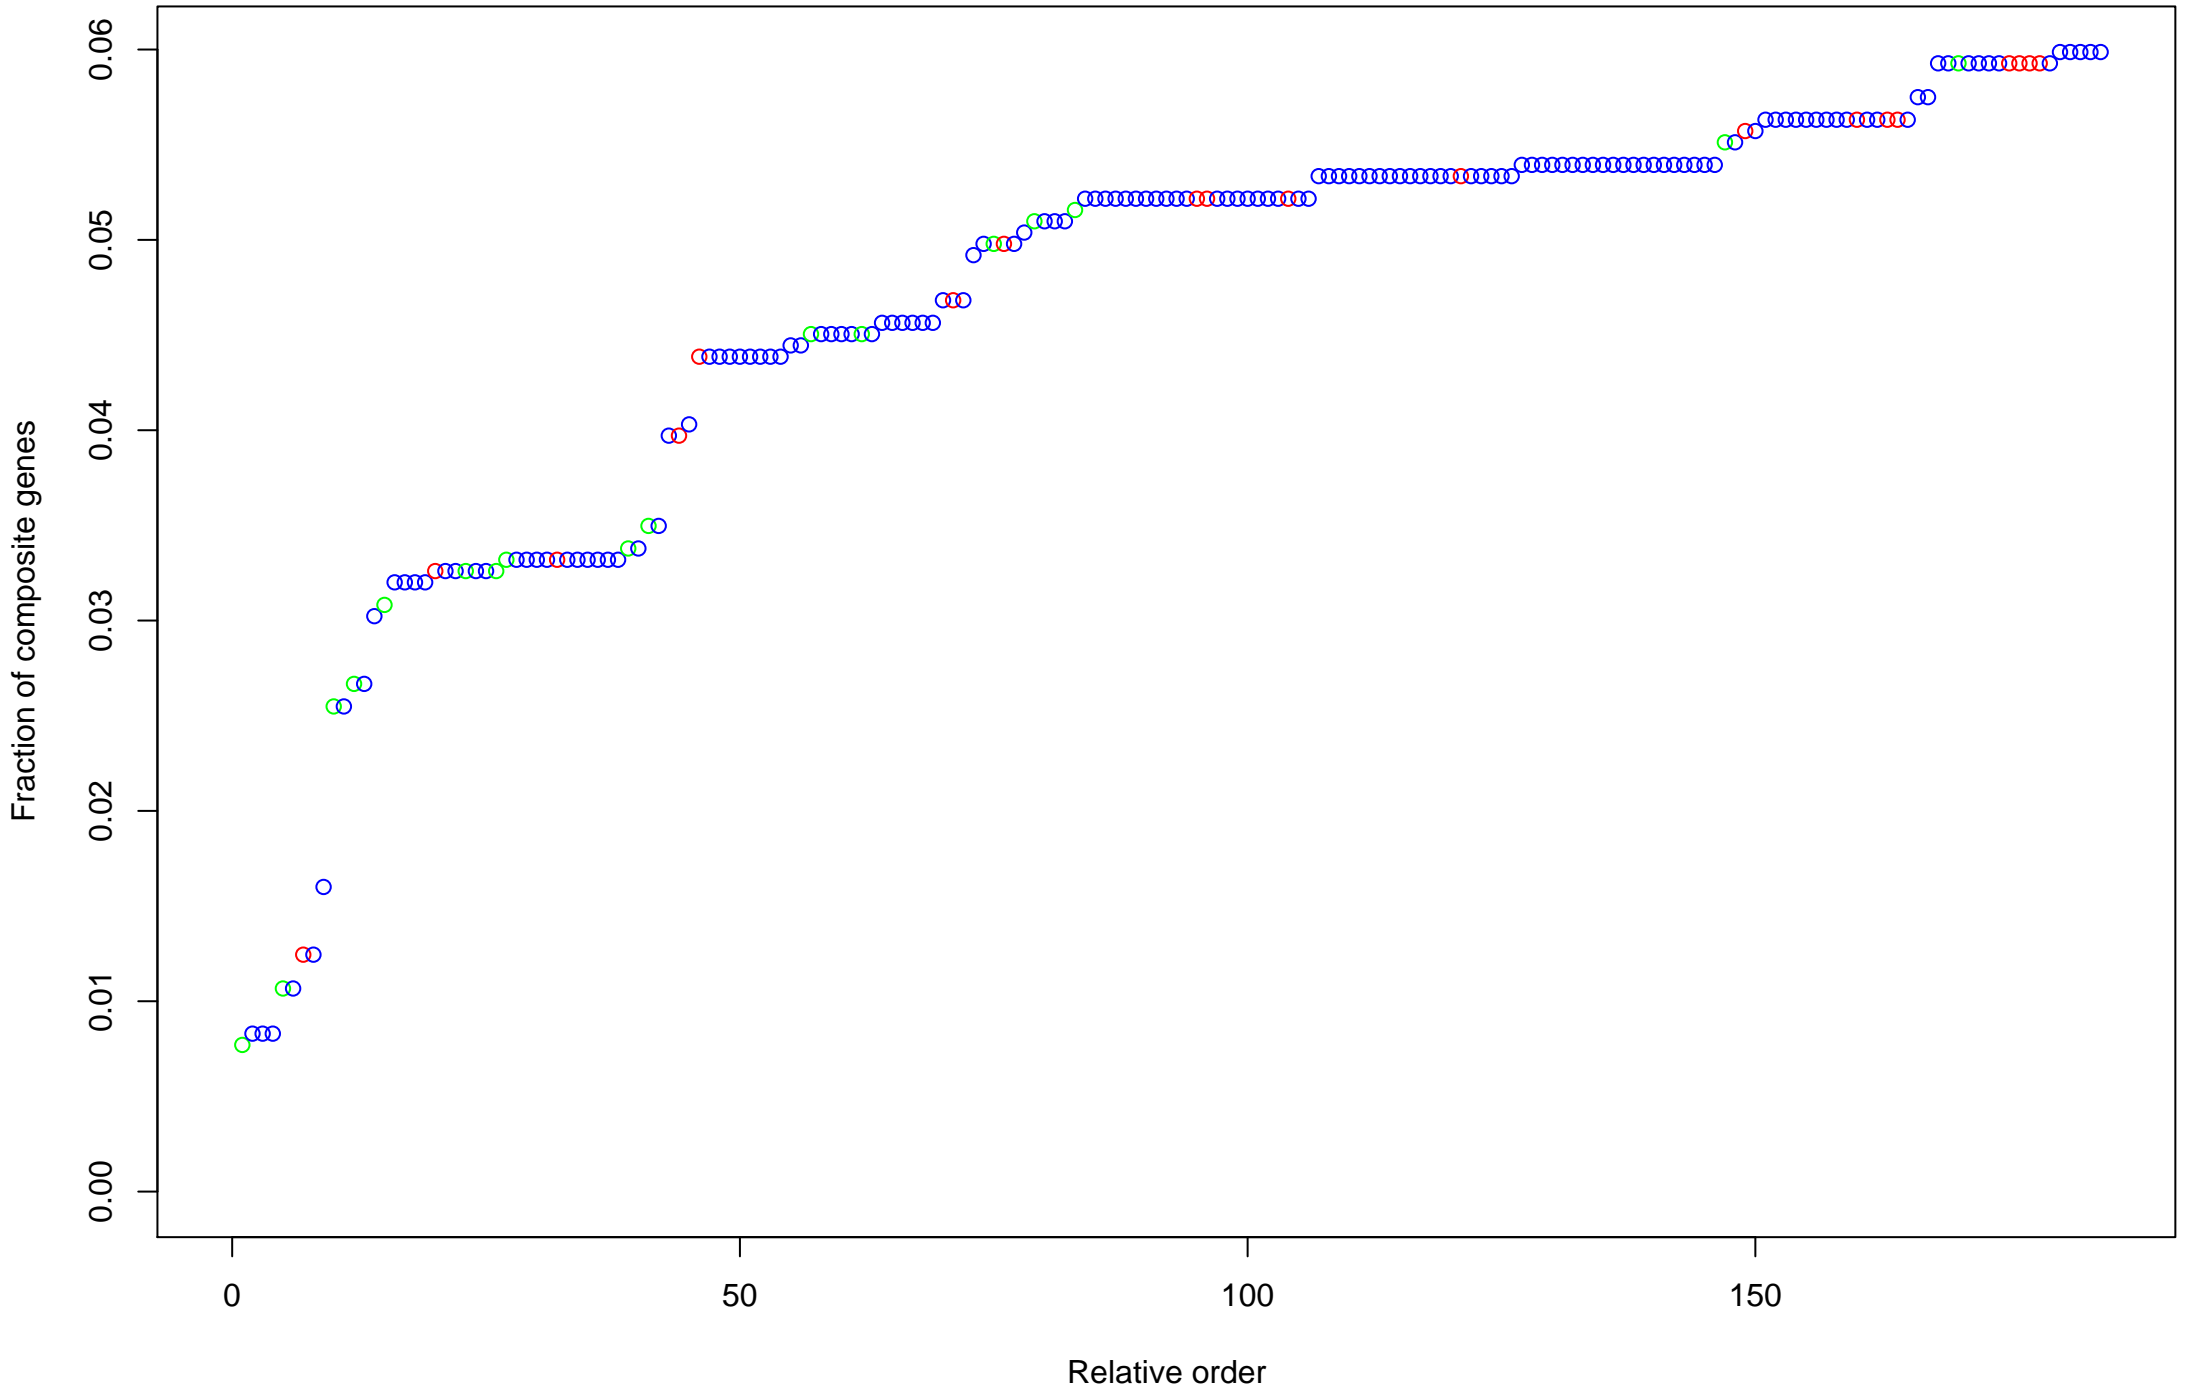

# MACE-C2A-01 (*Methanosarcina acetivorans*)

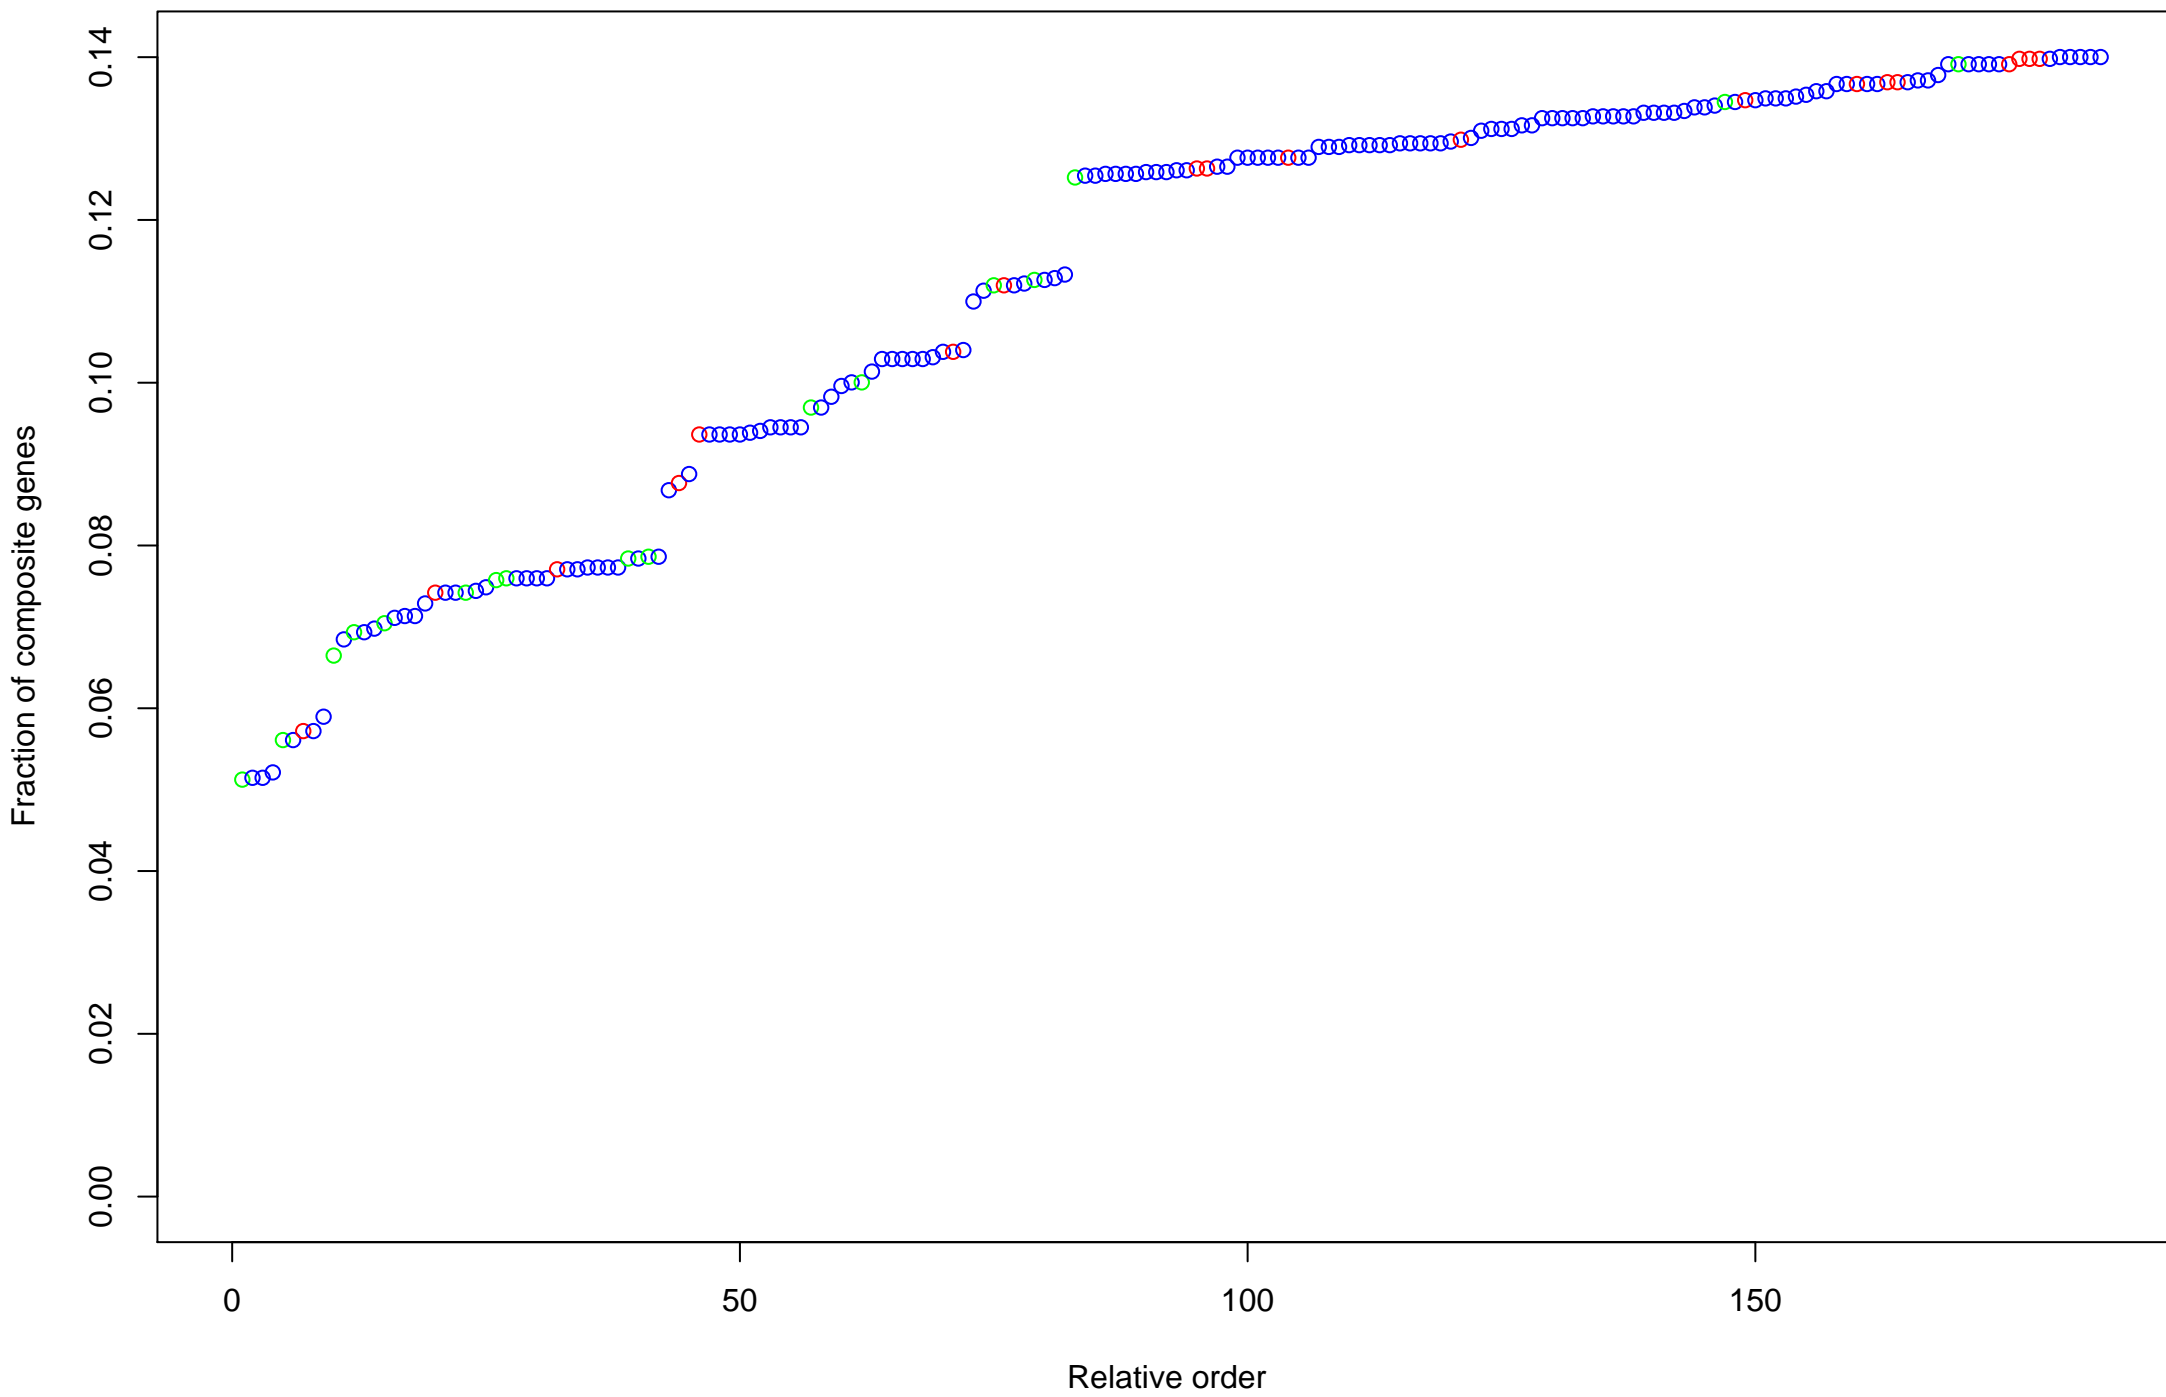

# SPYO-MGA-01 (*Streptococcus pyogenes* M18)

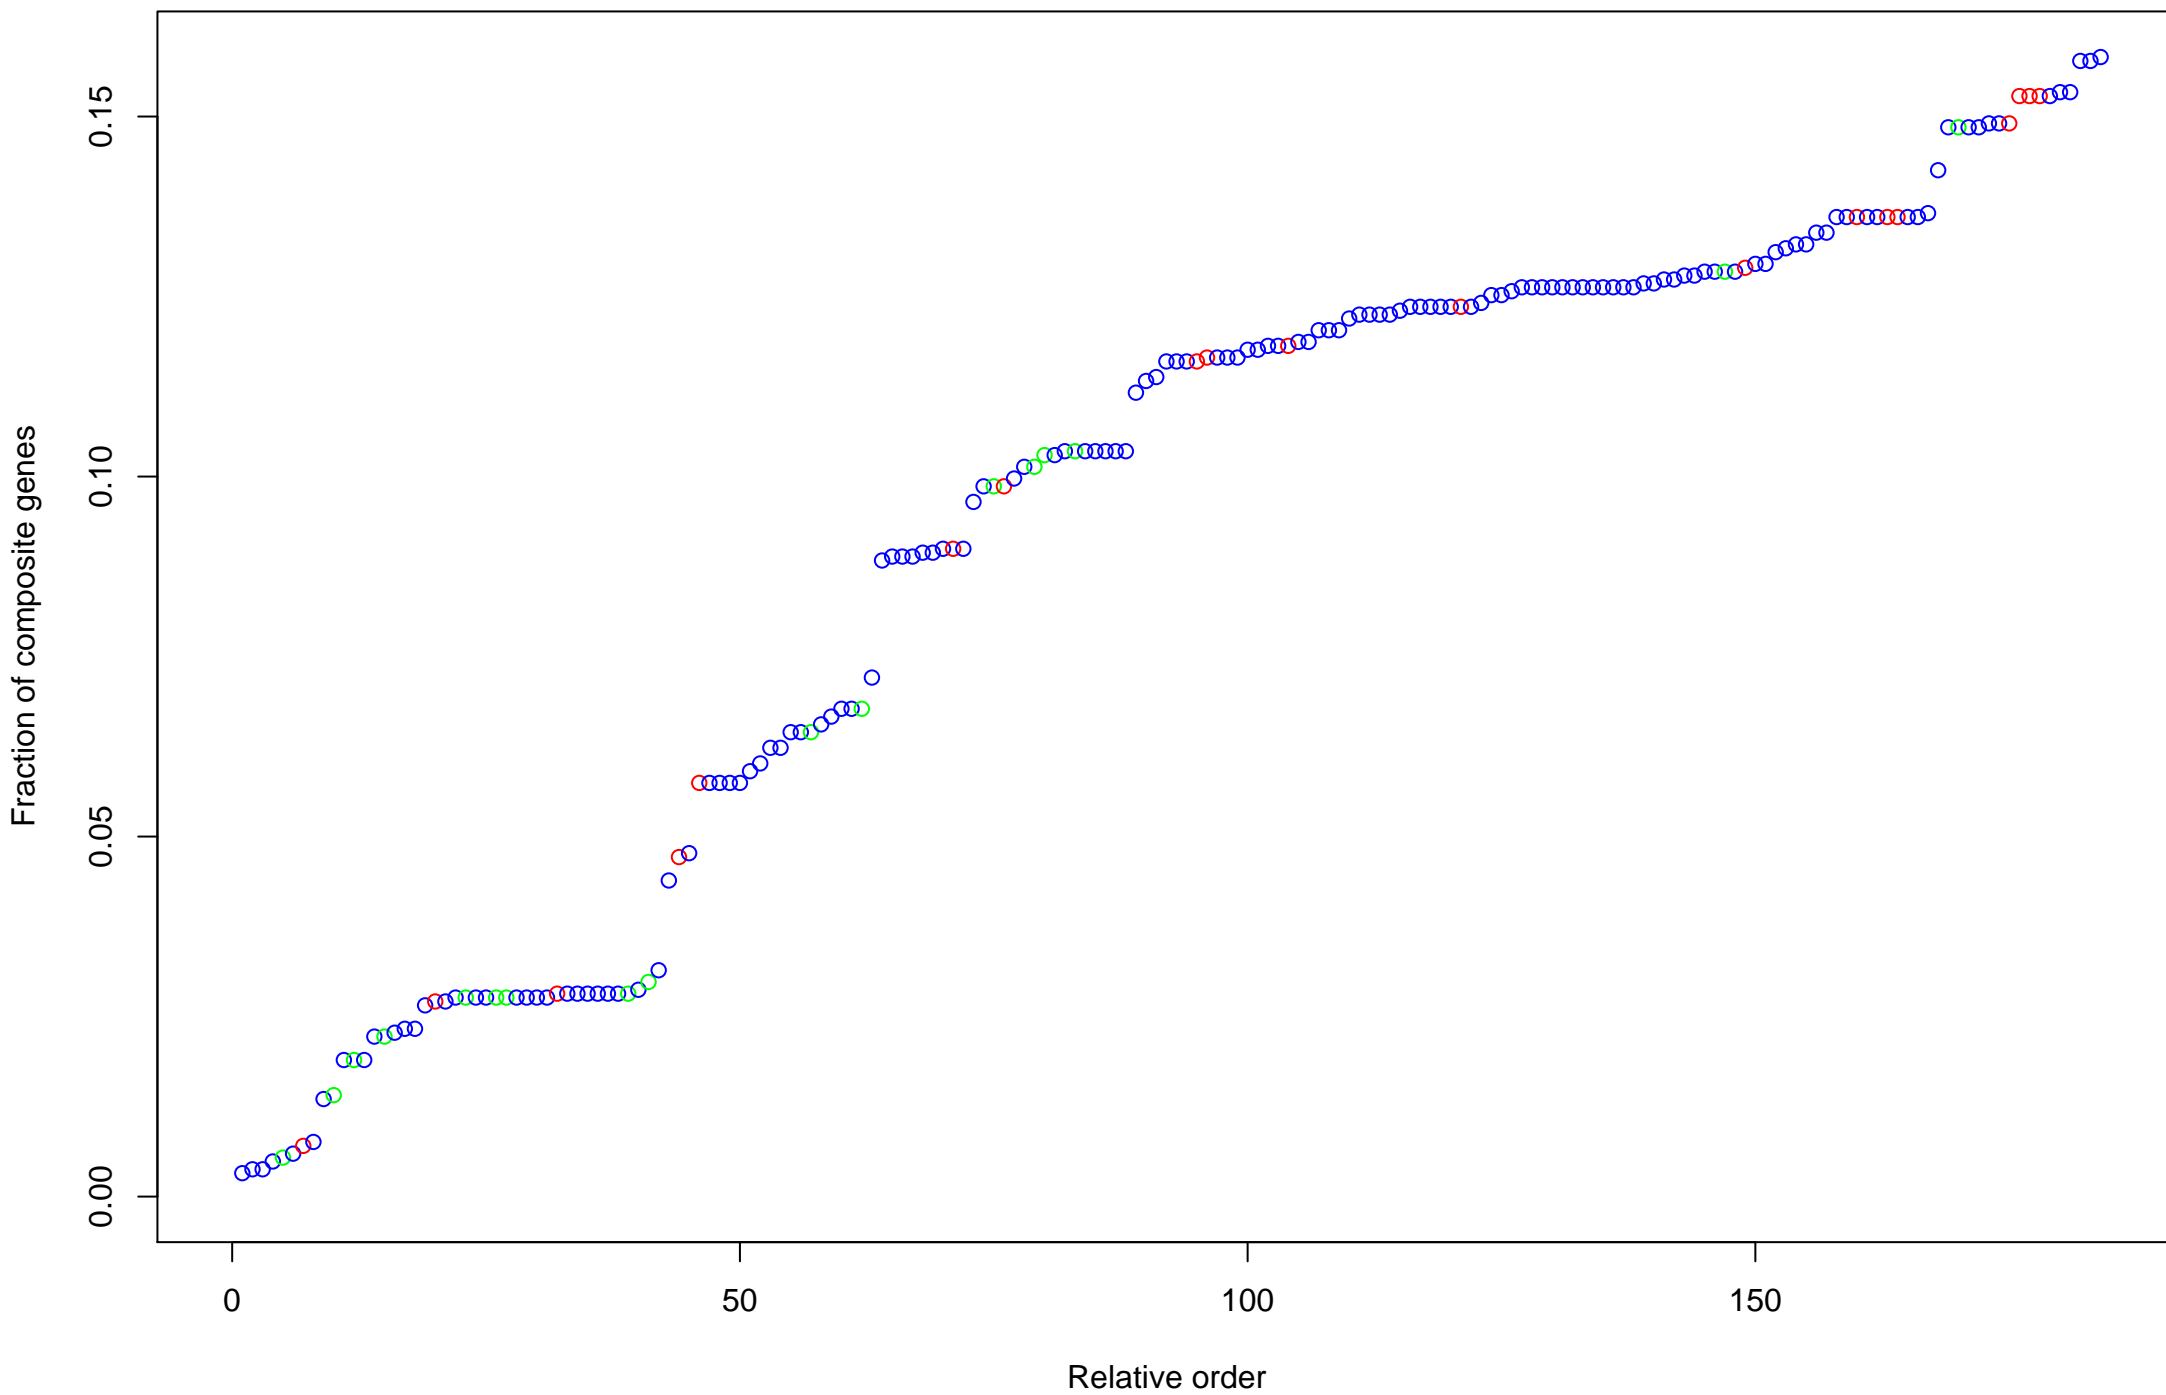



# SCOE-A32-01 (*Streptomyces coelicolor*)

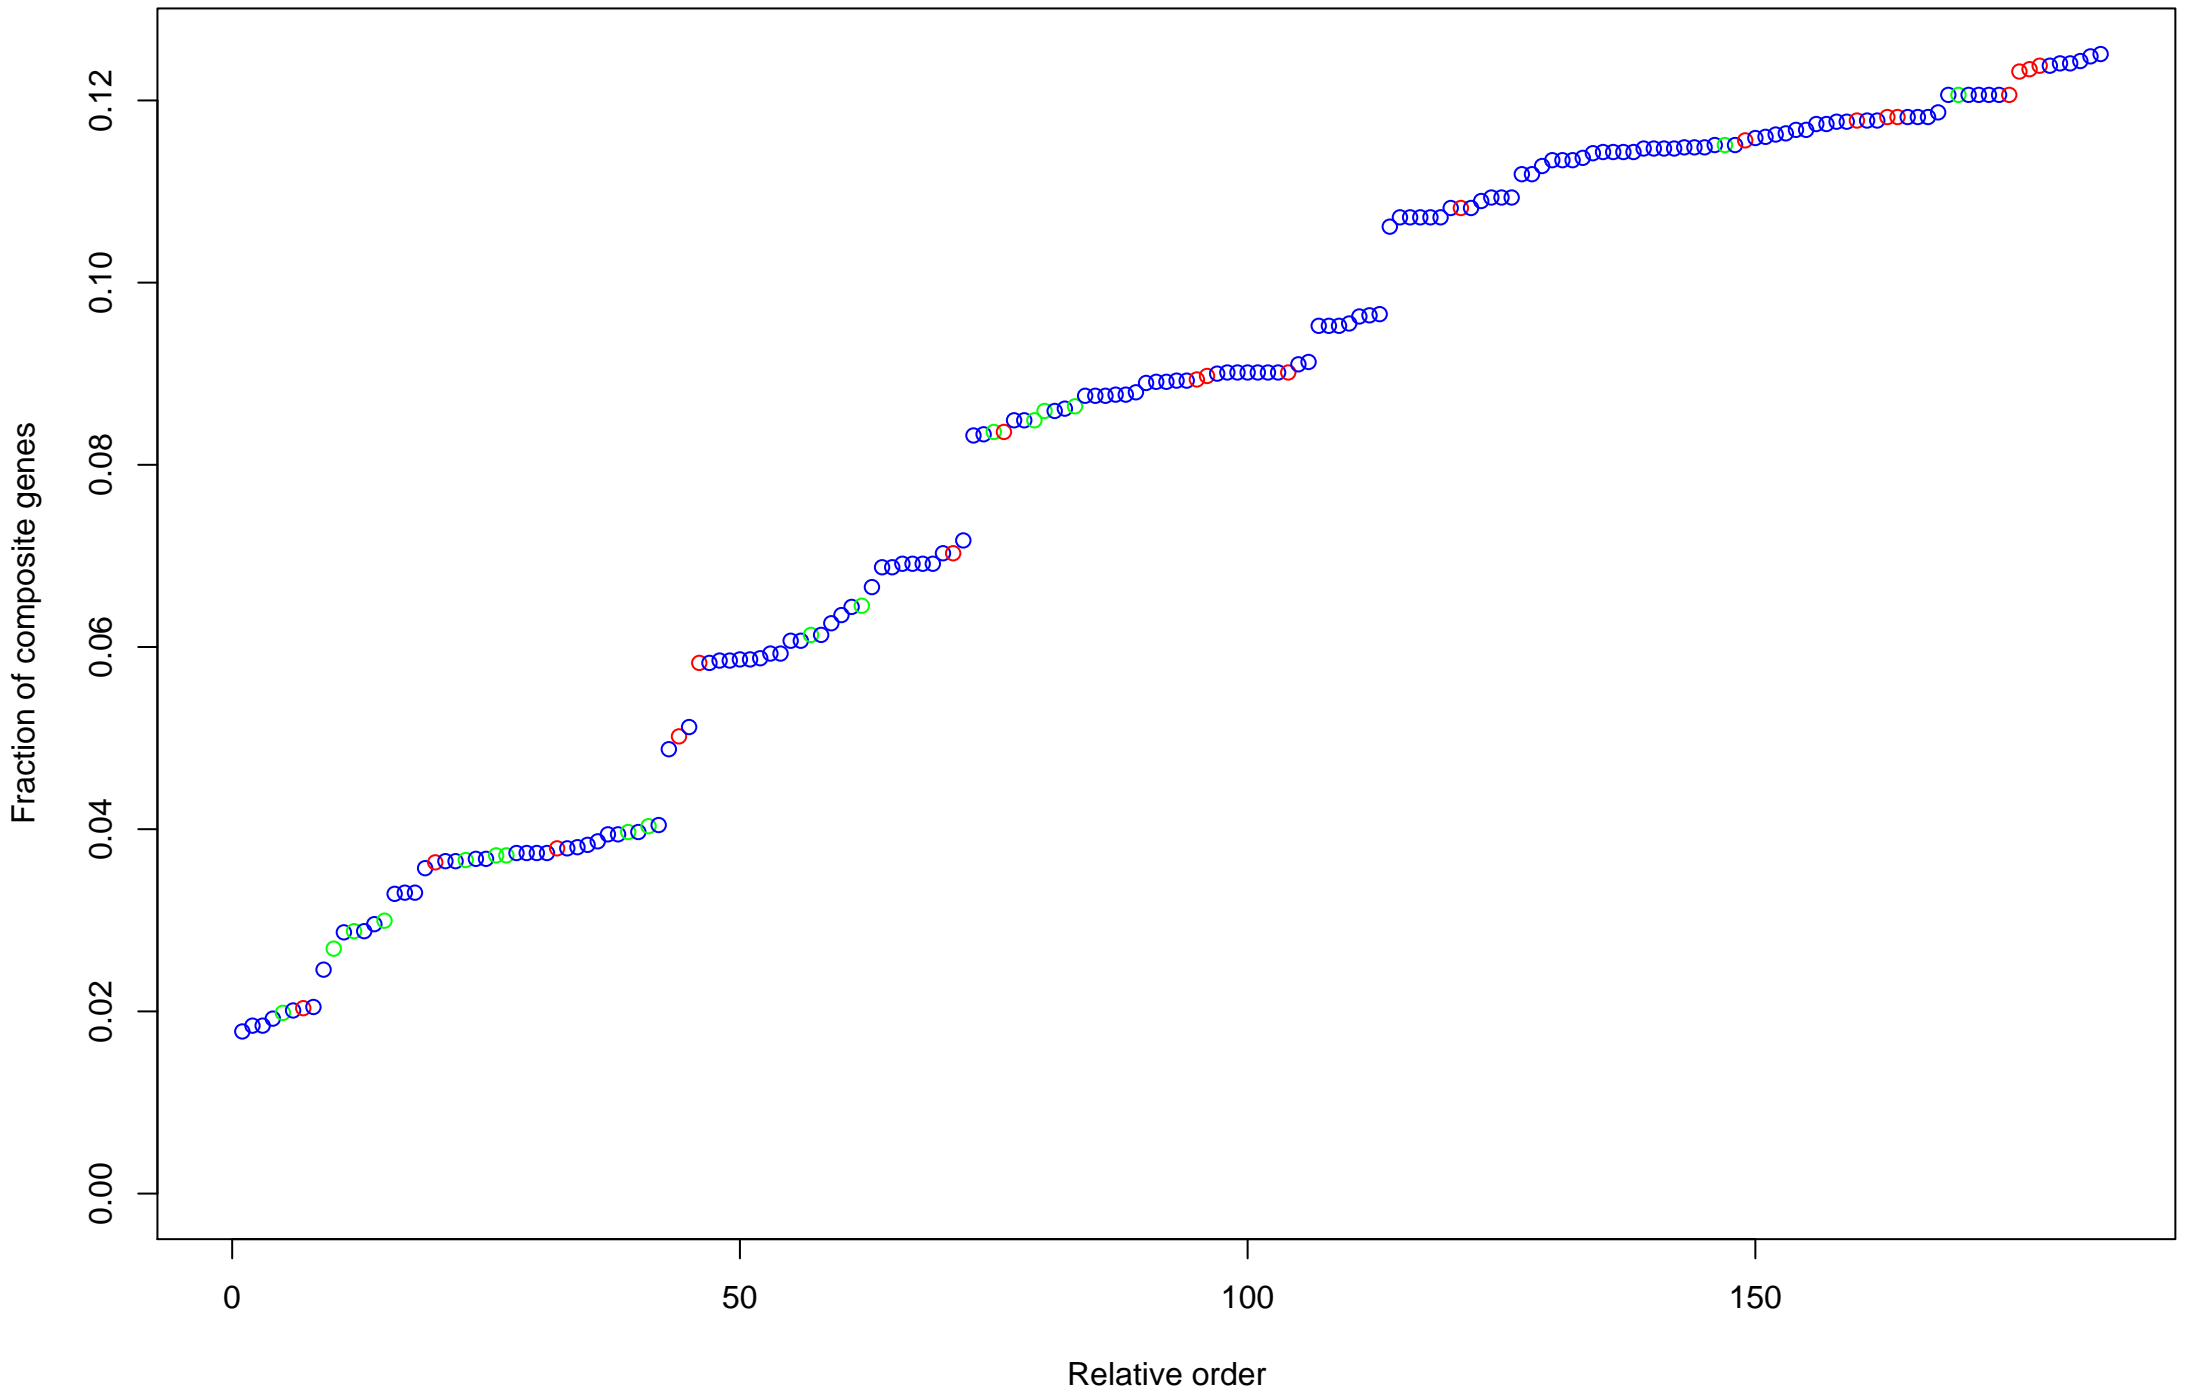

# TTEN-MB4-01 (*Thermoanaerobacter tengcongensis*)

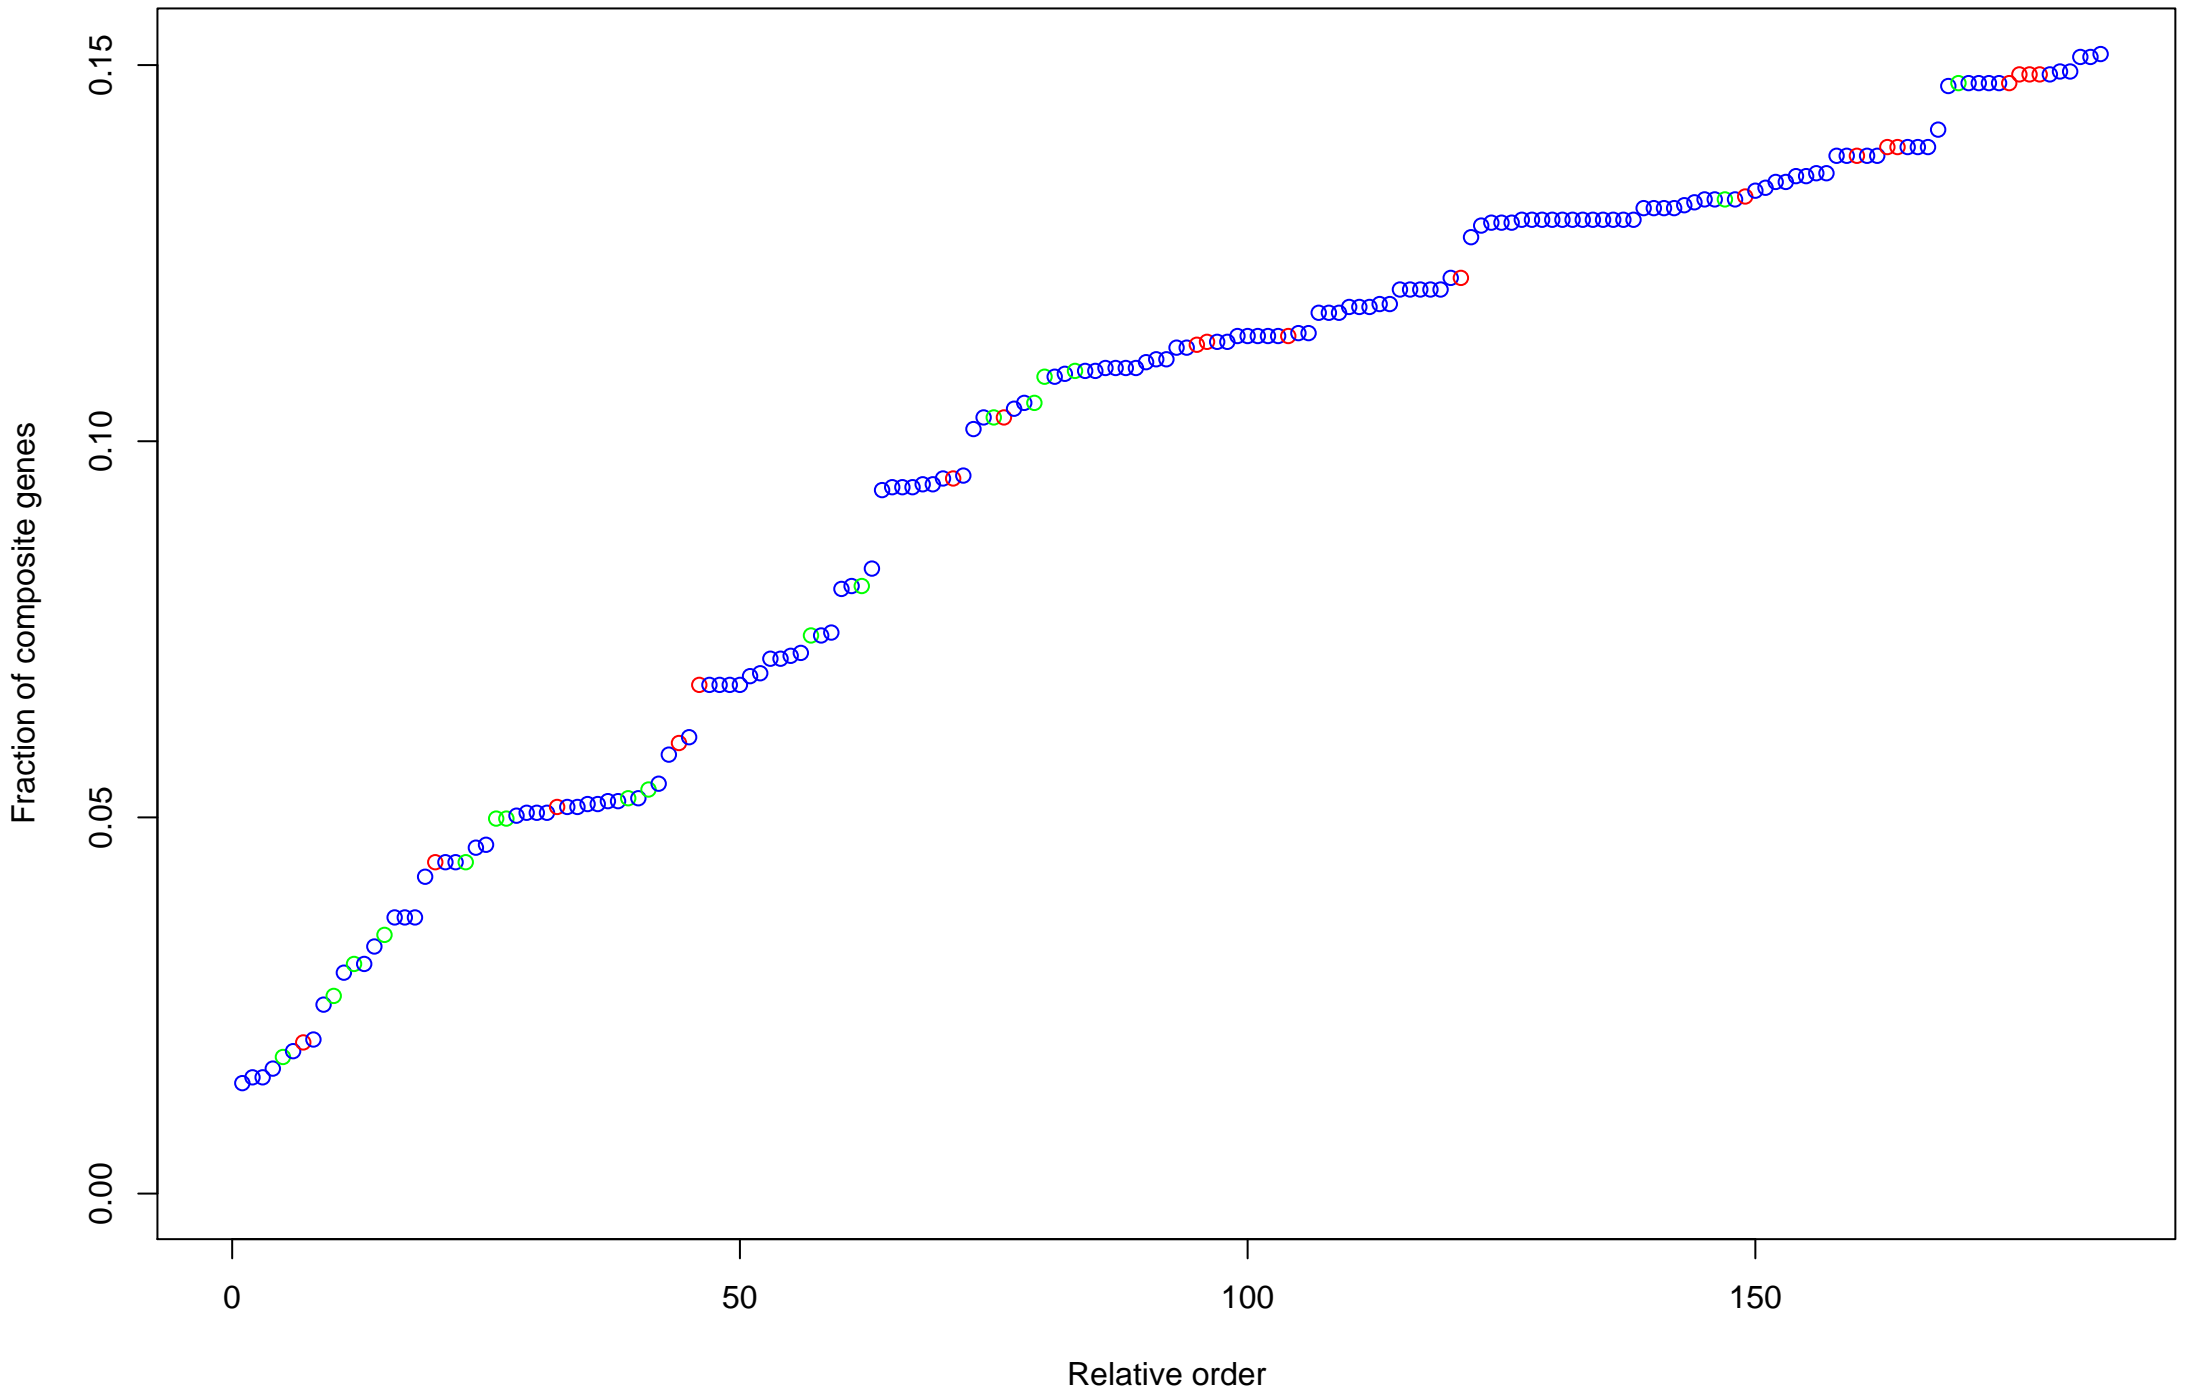

# MMAZ-GO1-01 (*Methanosarcina mazei*)

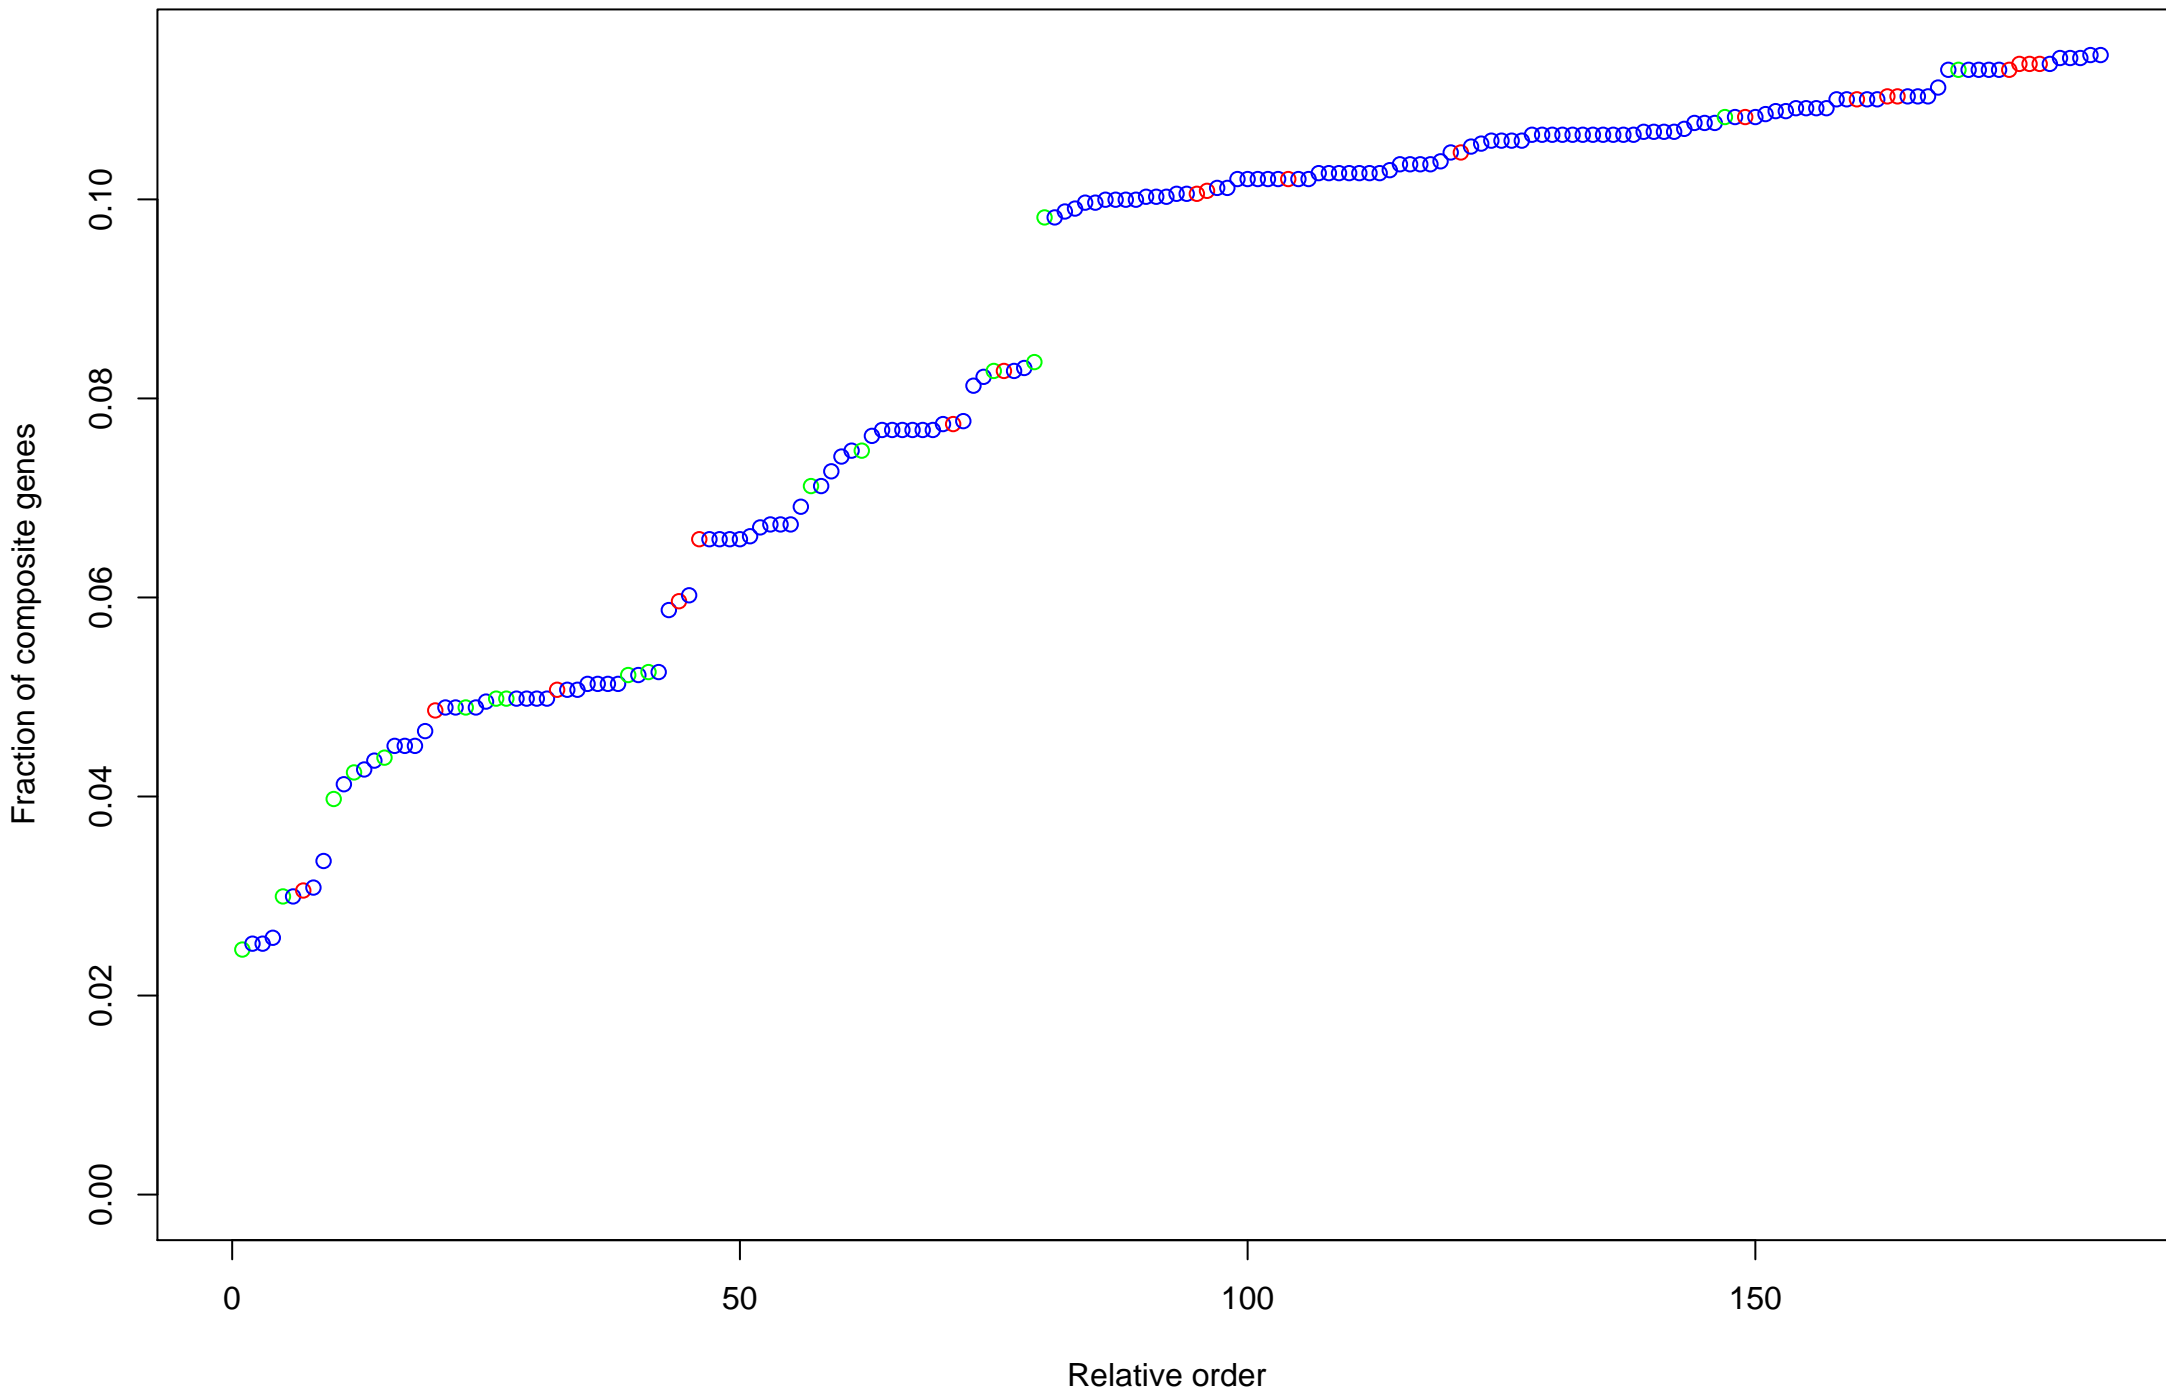

# XAXO-306-02 (*Xanthomonas axonopodis* pv. *citri*)

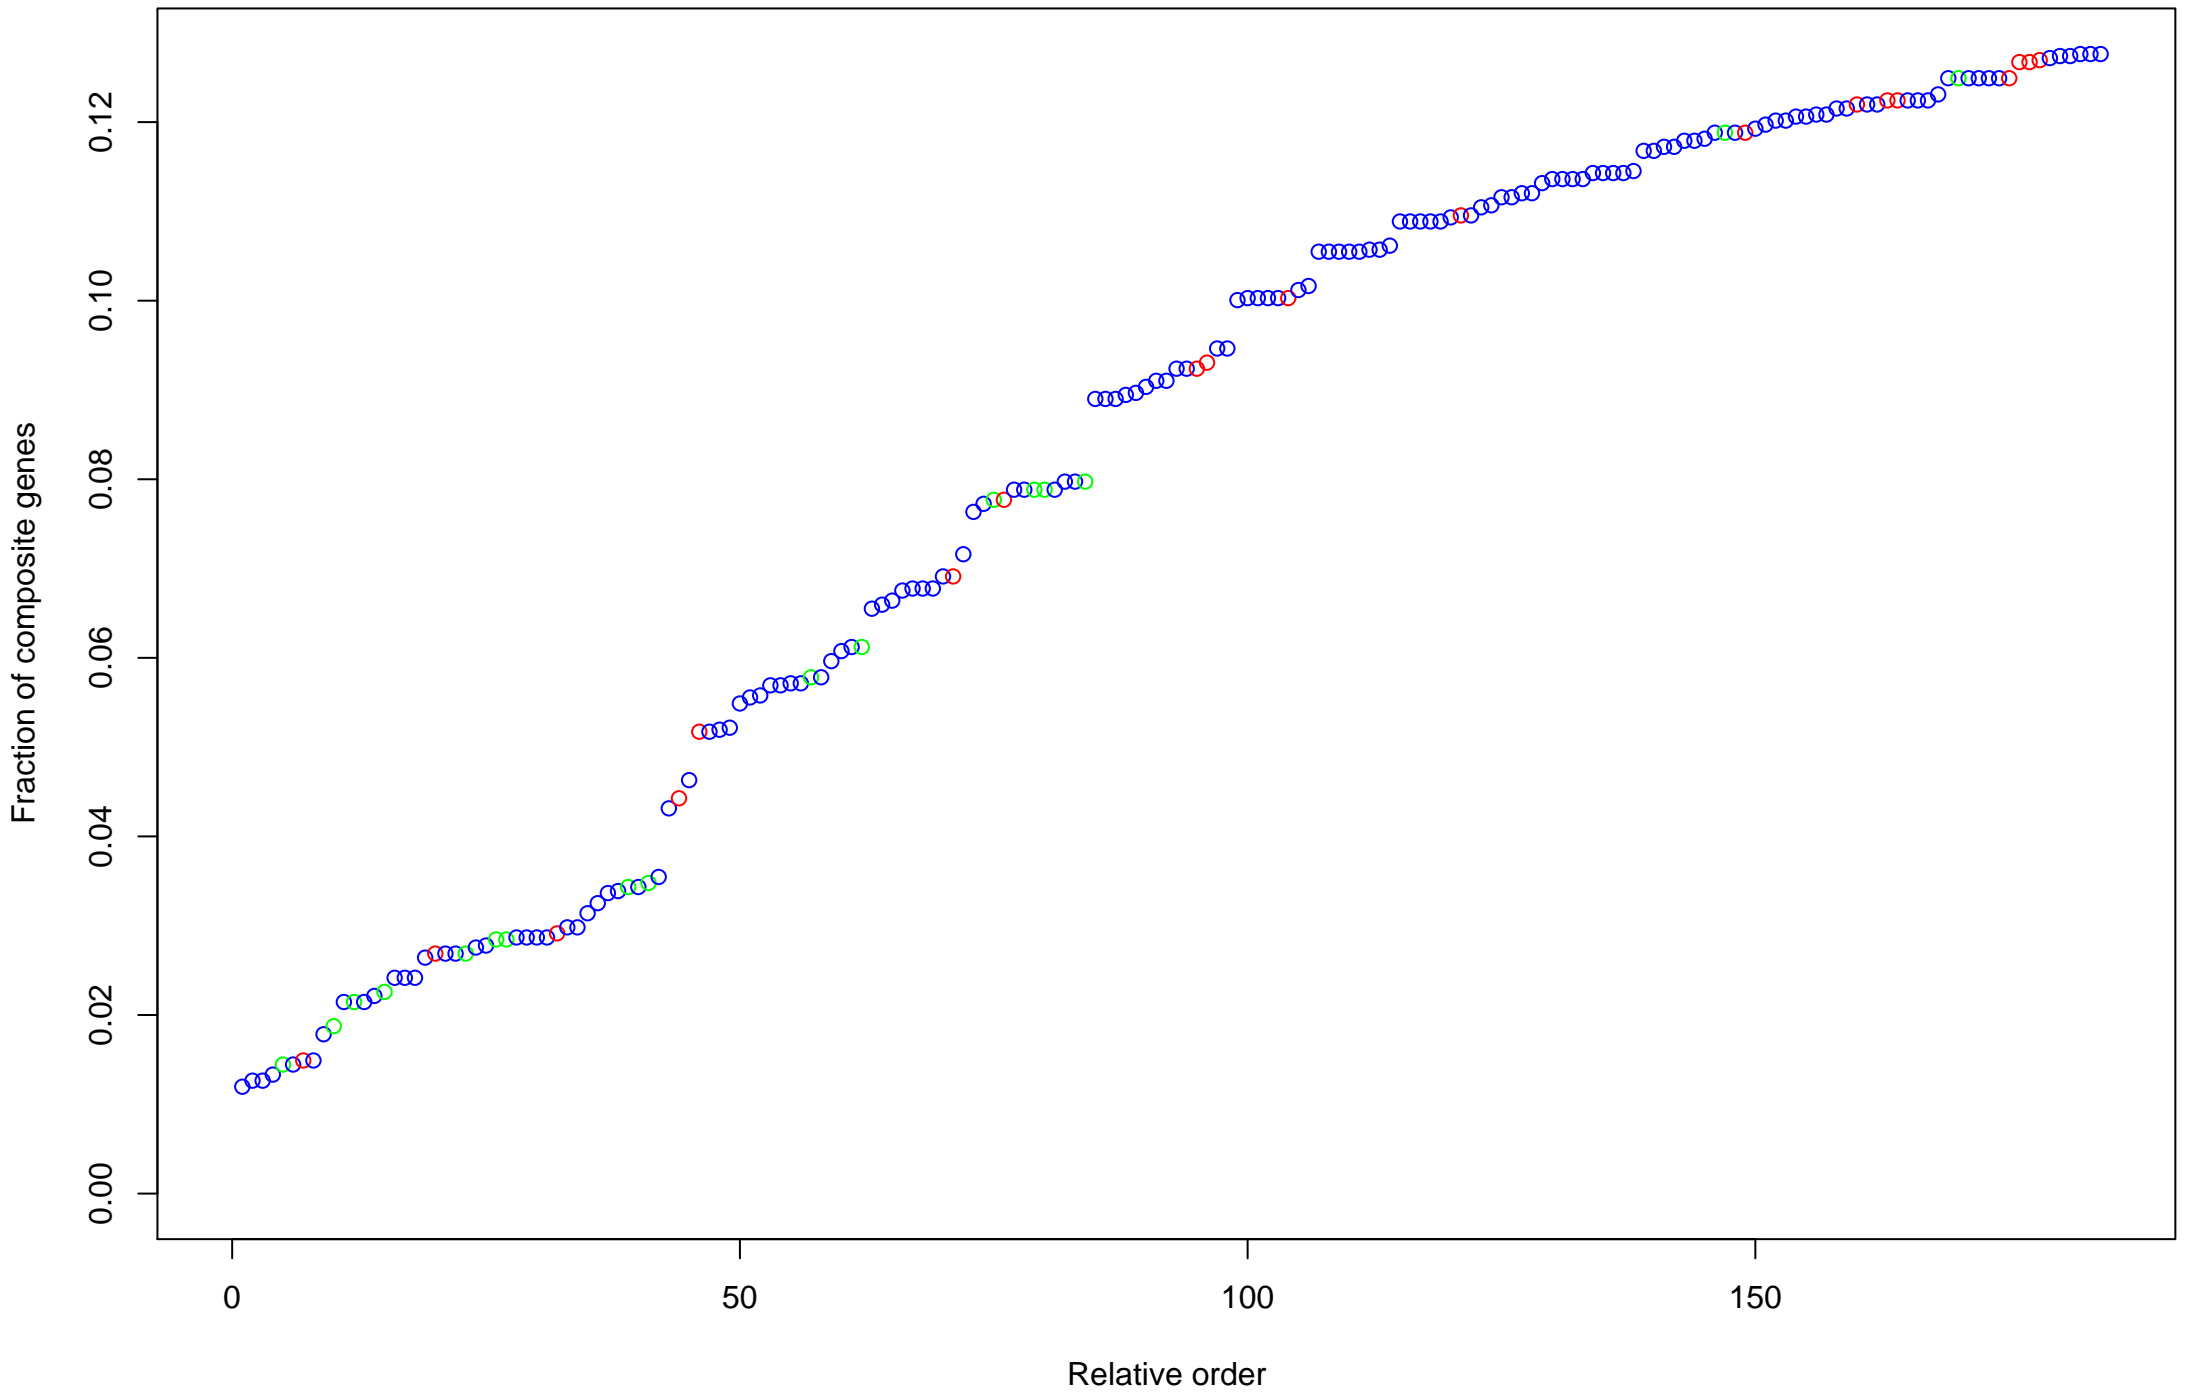

# XCAM-AT3-01 (*Xanthomonas campestris* pv. *campestris*)

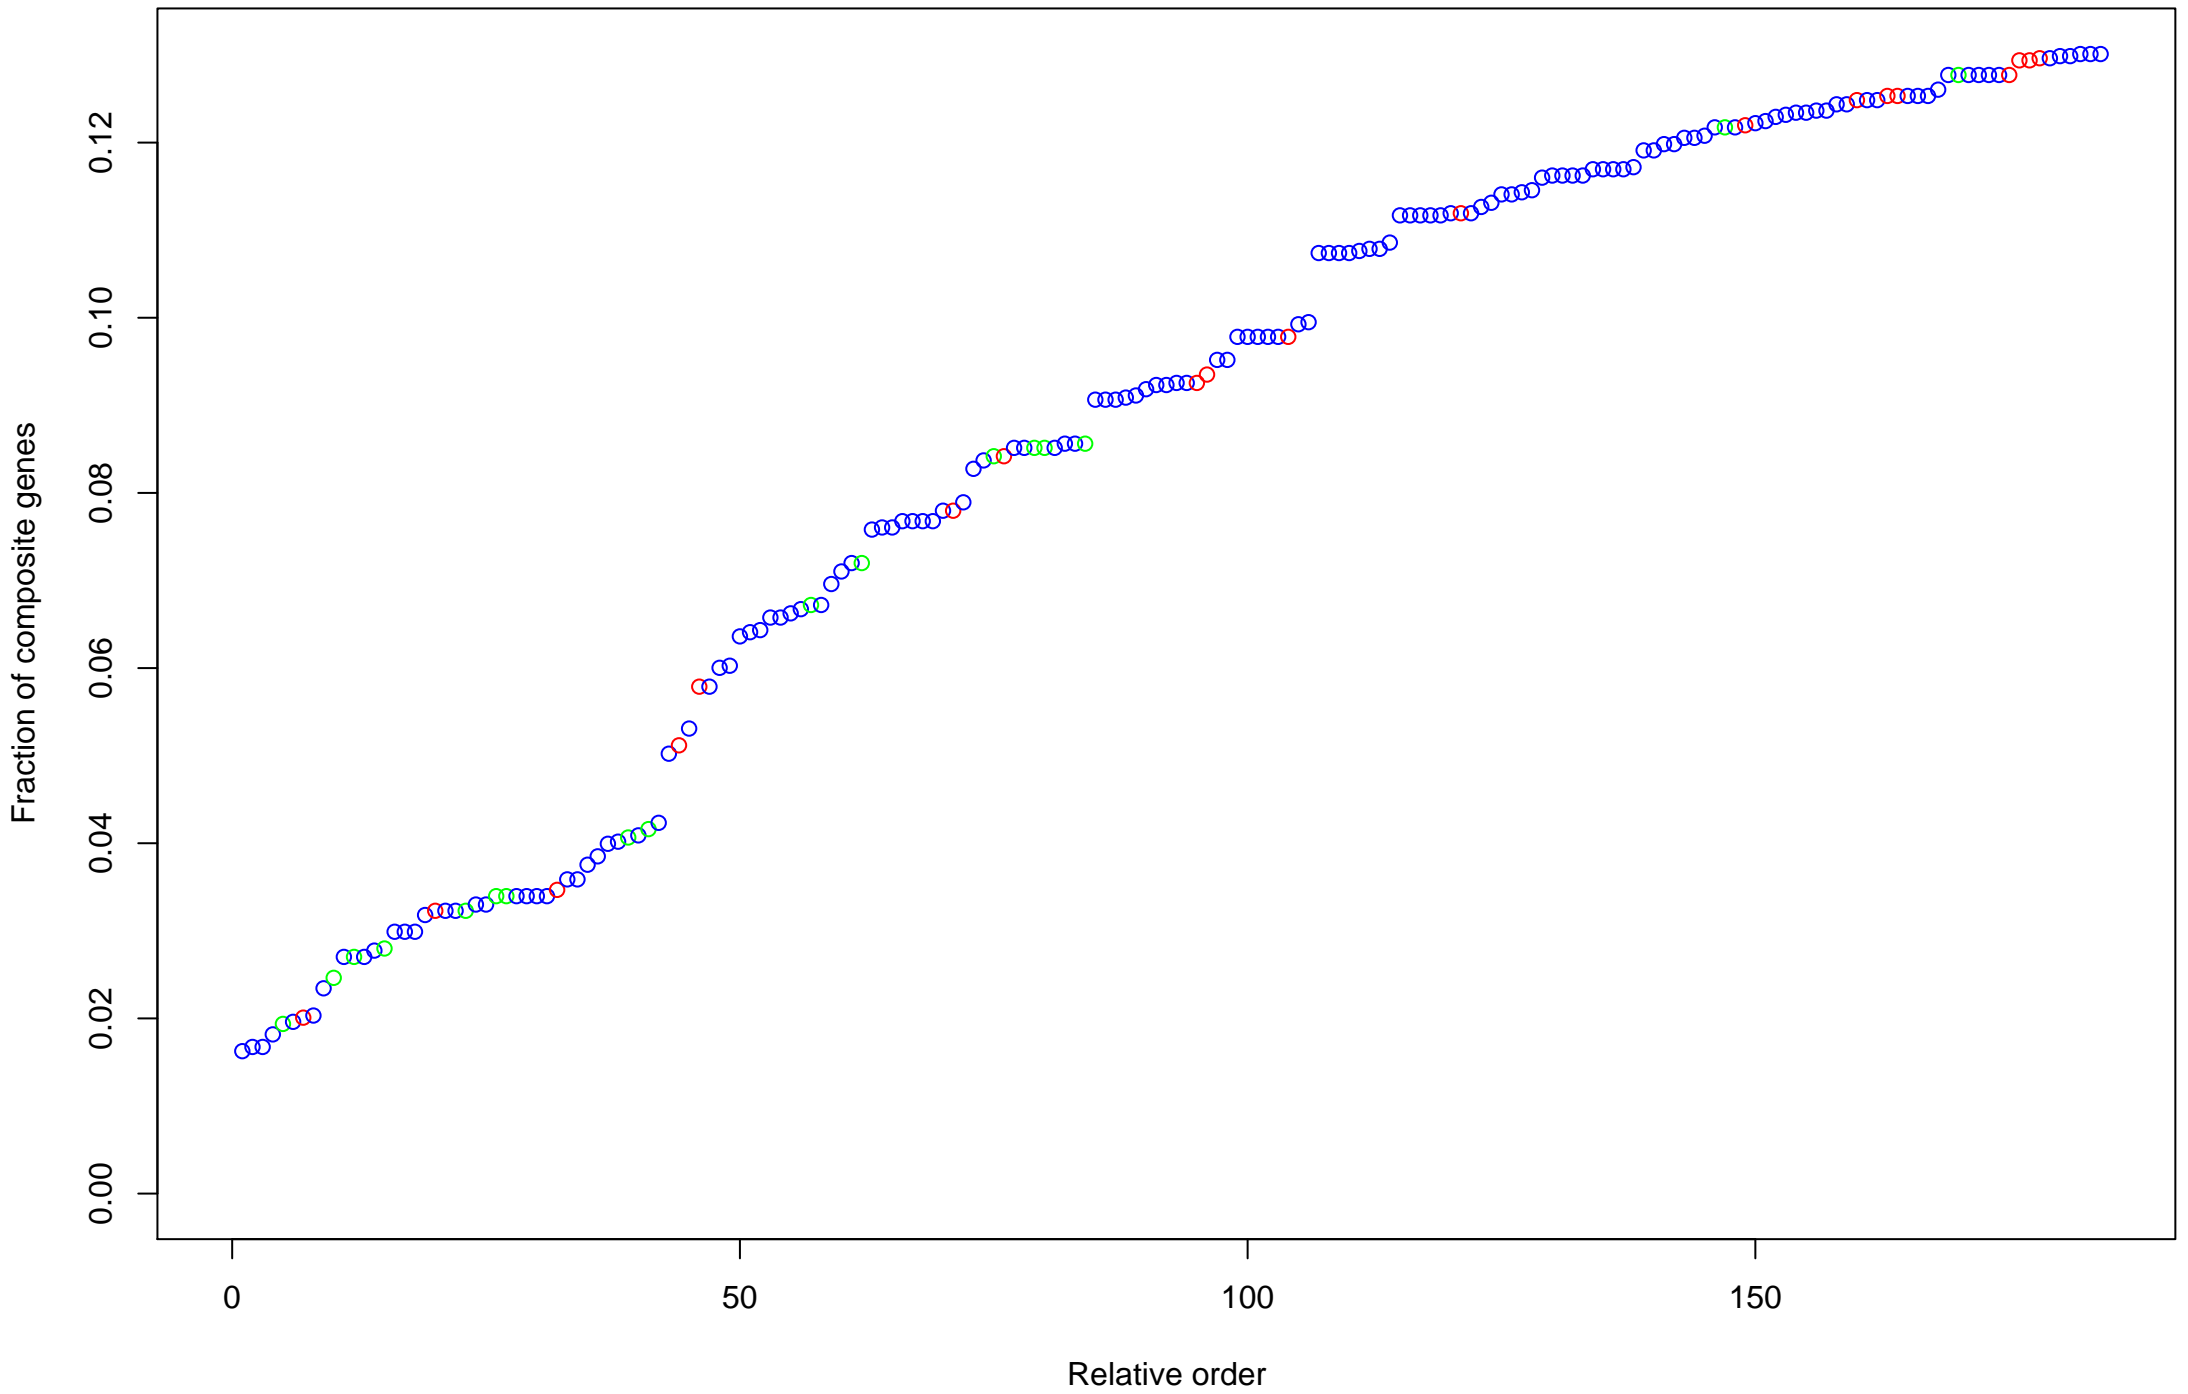

# SAUR-MW2-01 (Staphylococcus aureus MRSA)

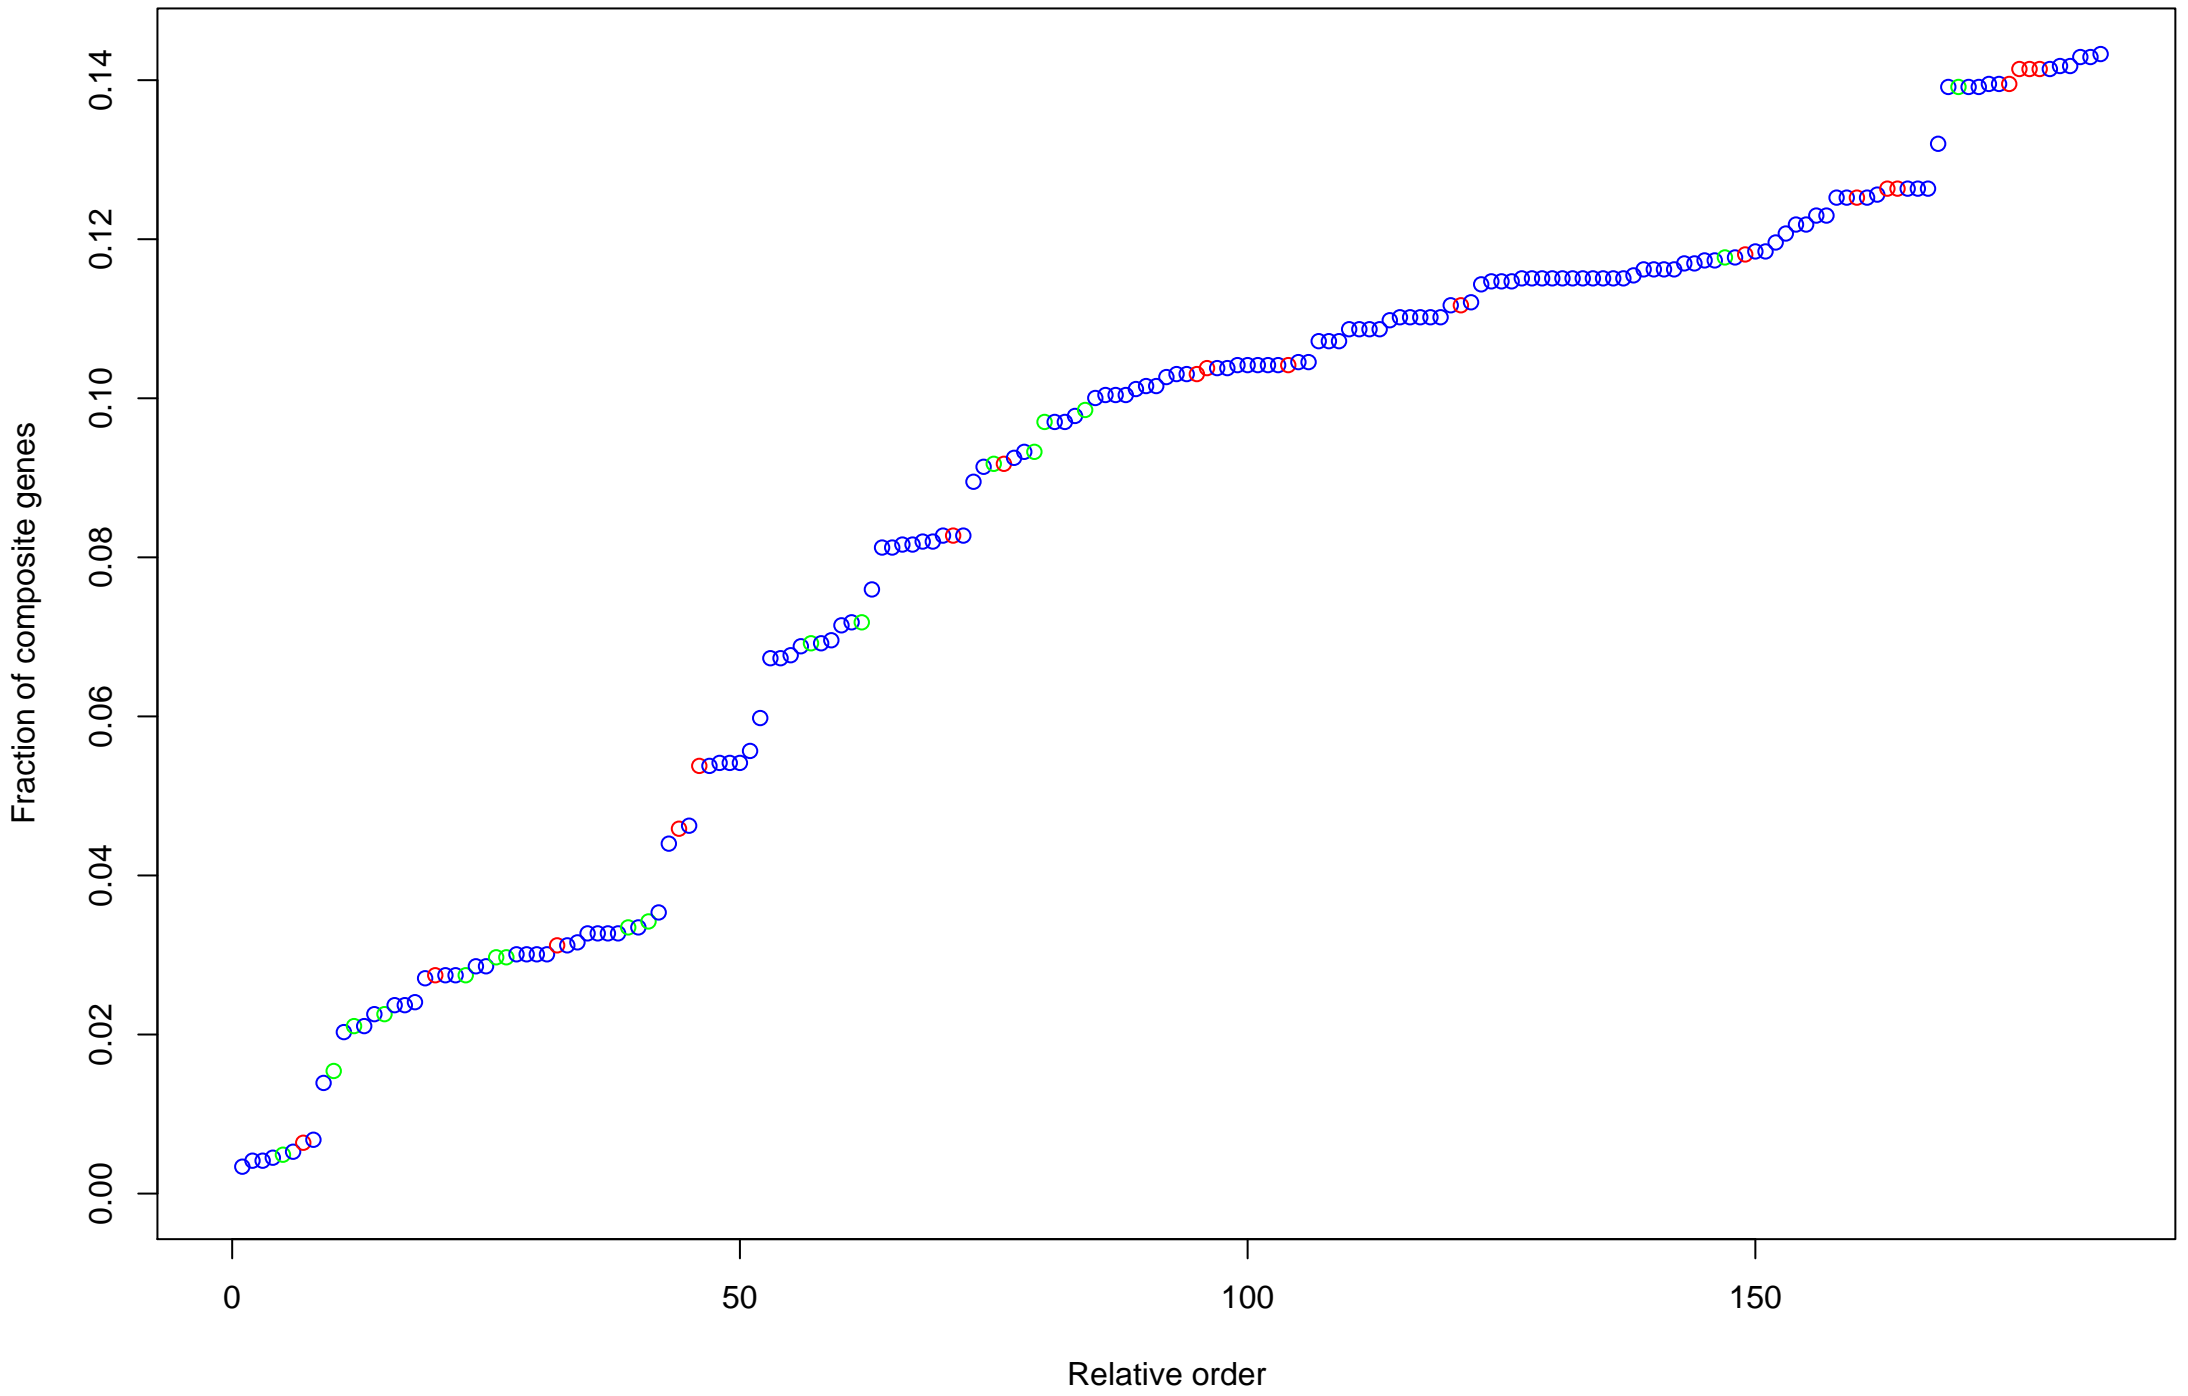

# BAPH-XSG-01 (*Buchnera aphidicola*)

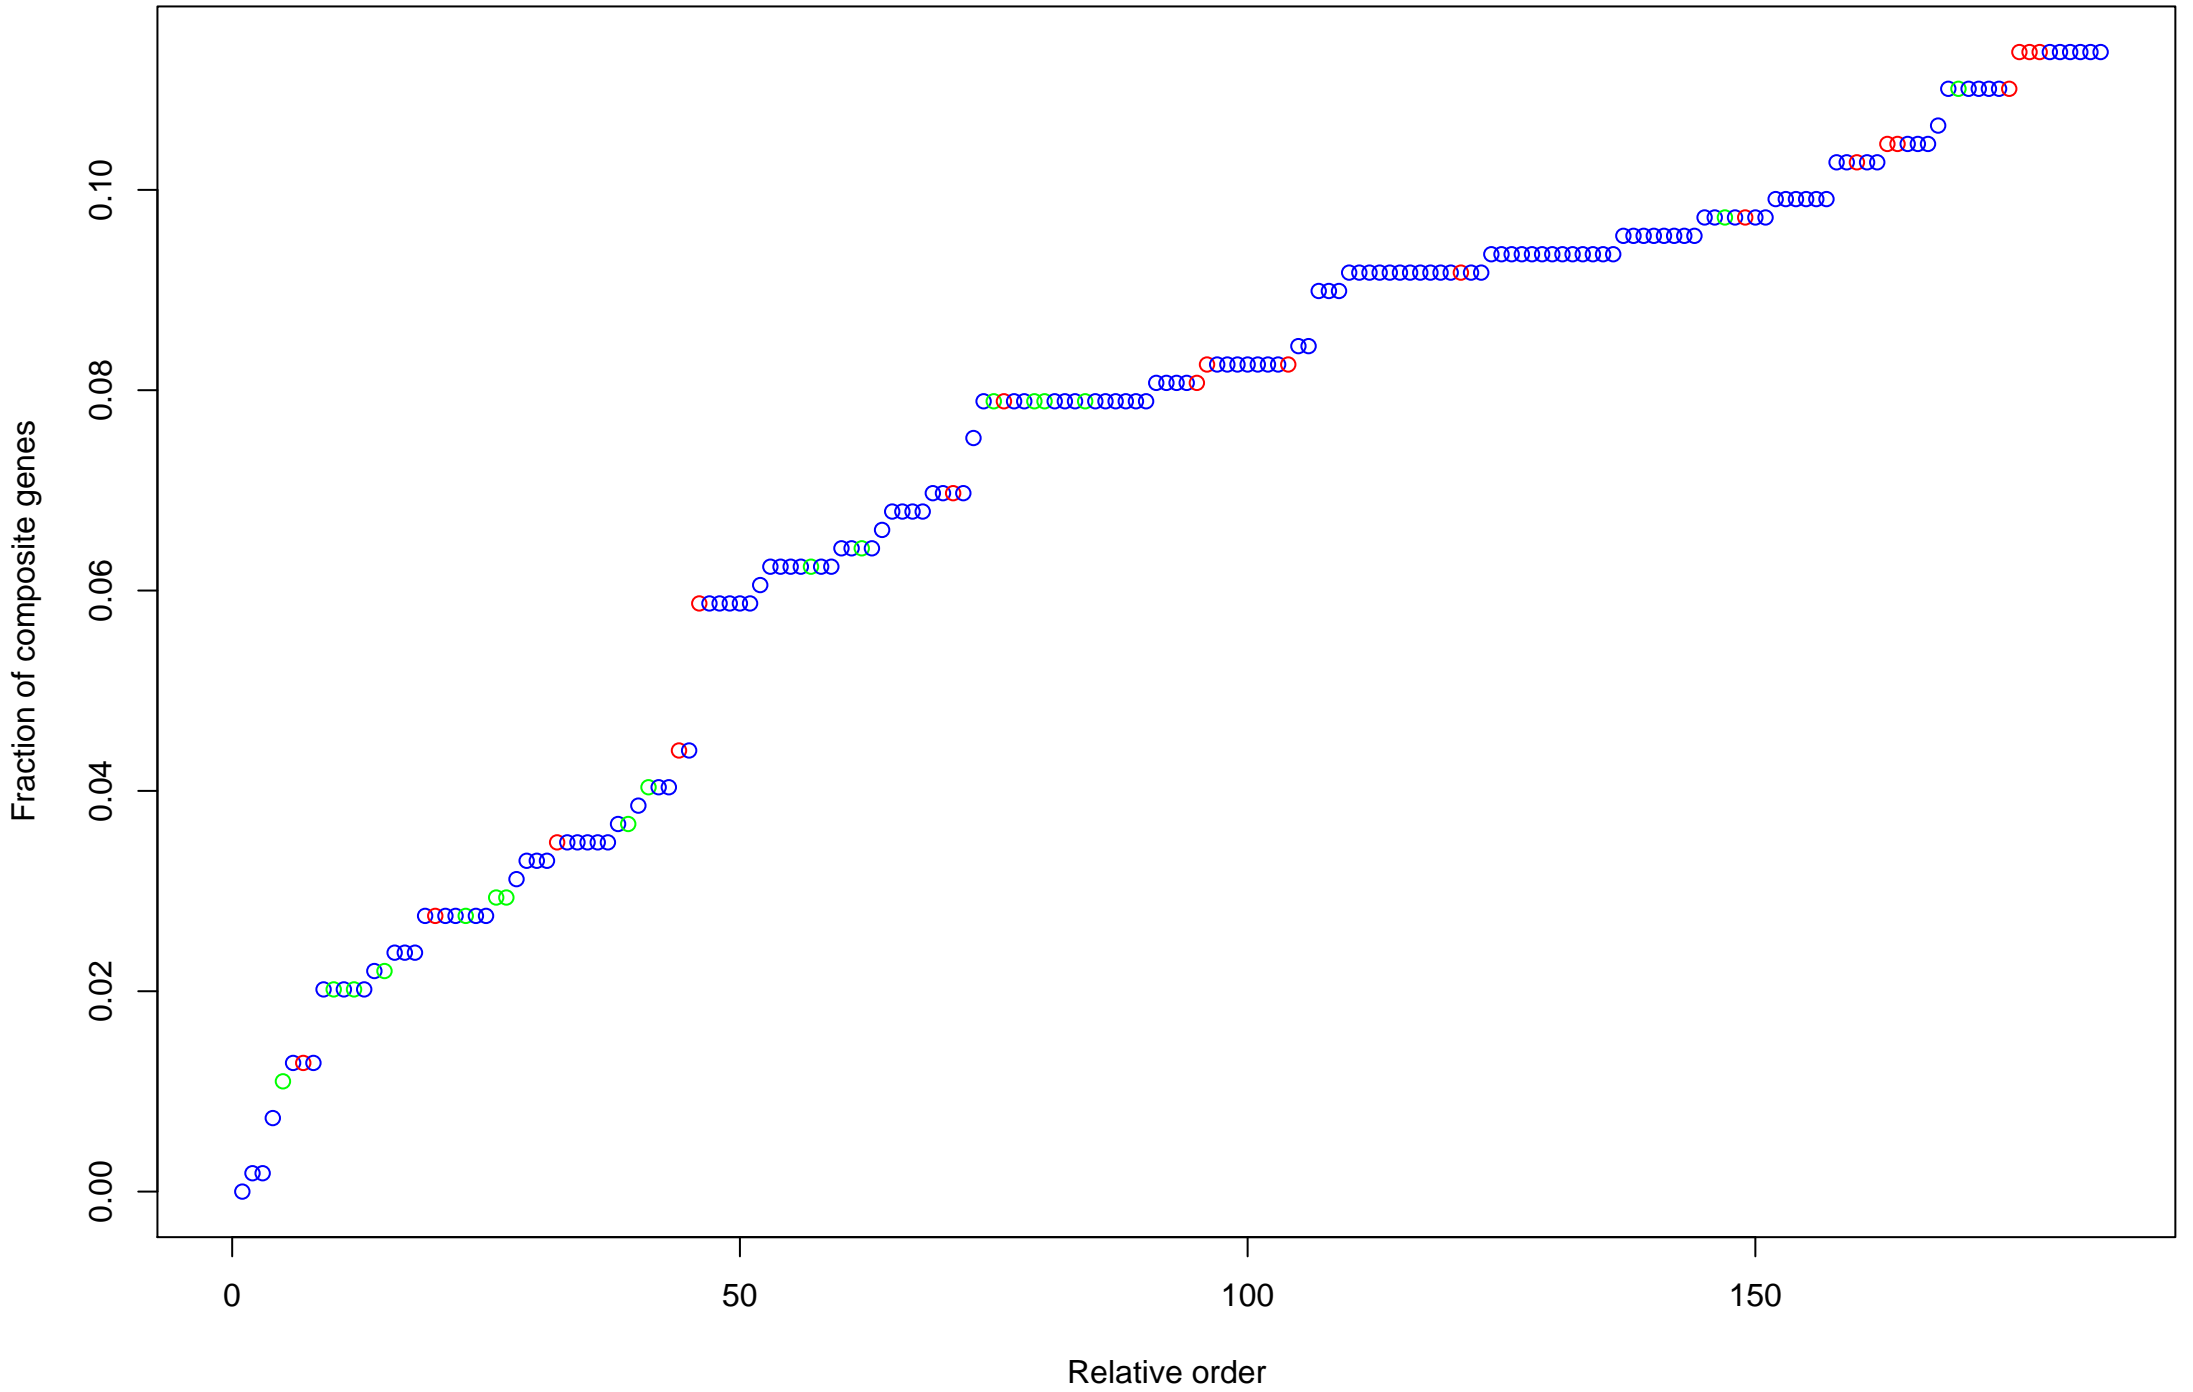

### CTEP-TLS-01 (*Chlorobium tepidum*)

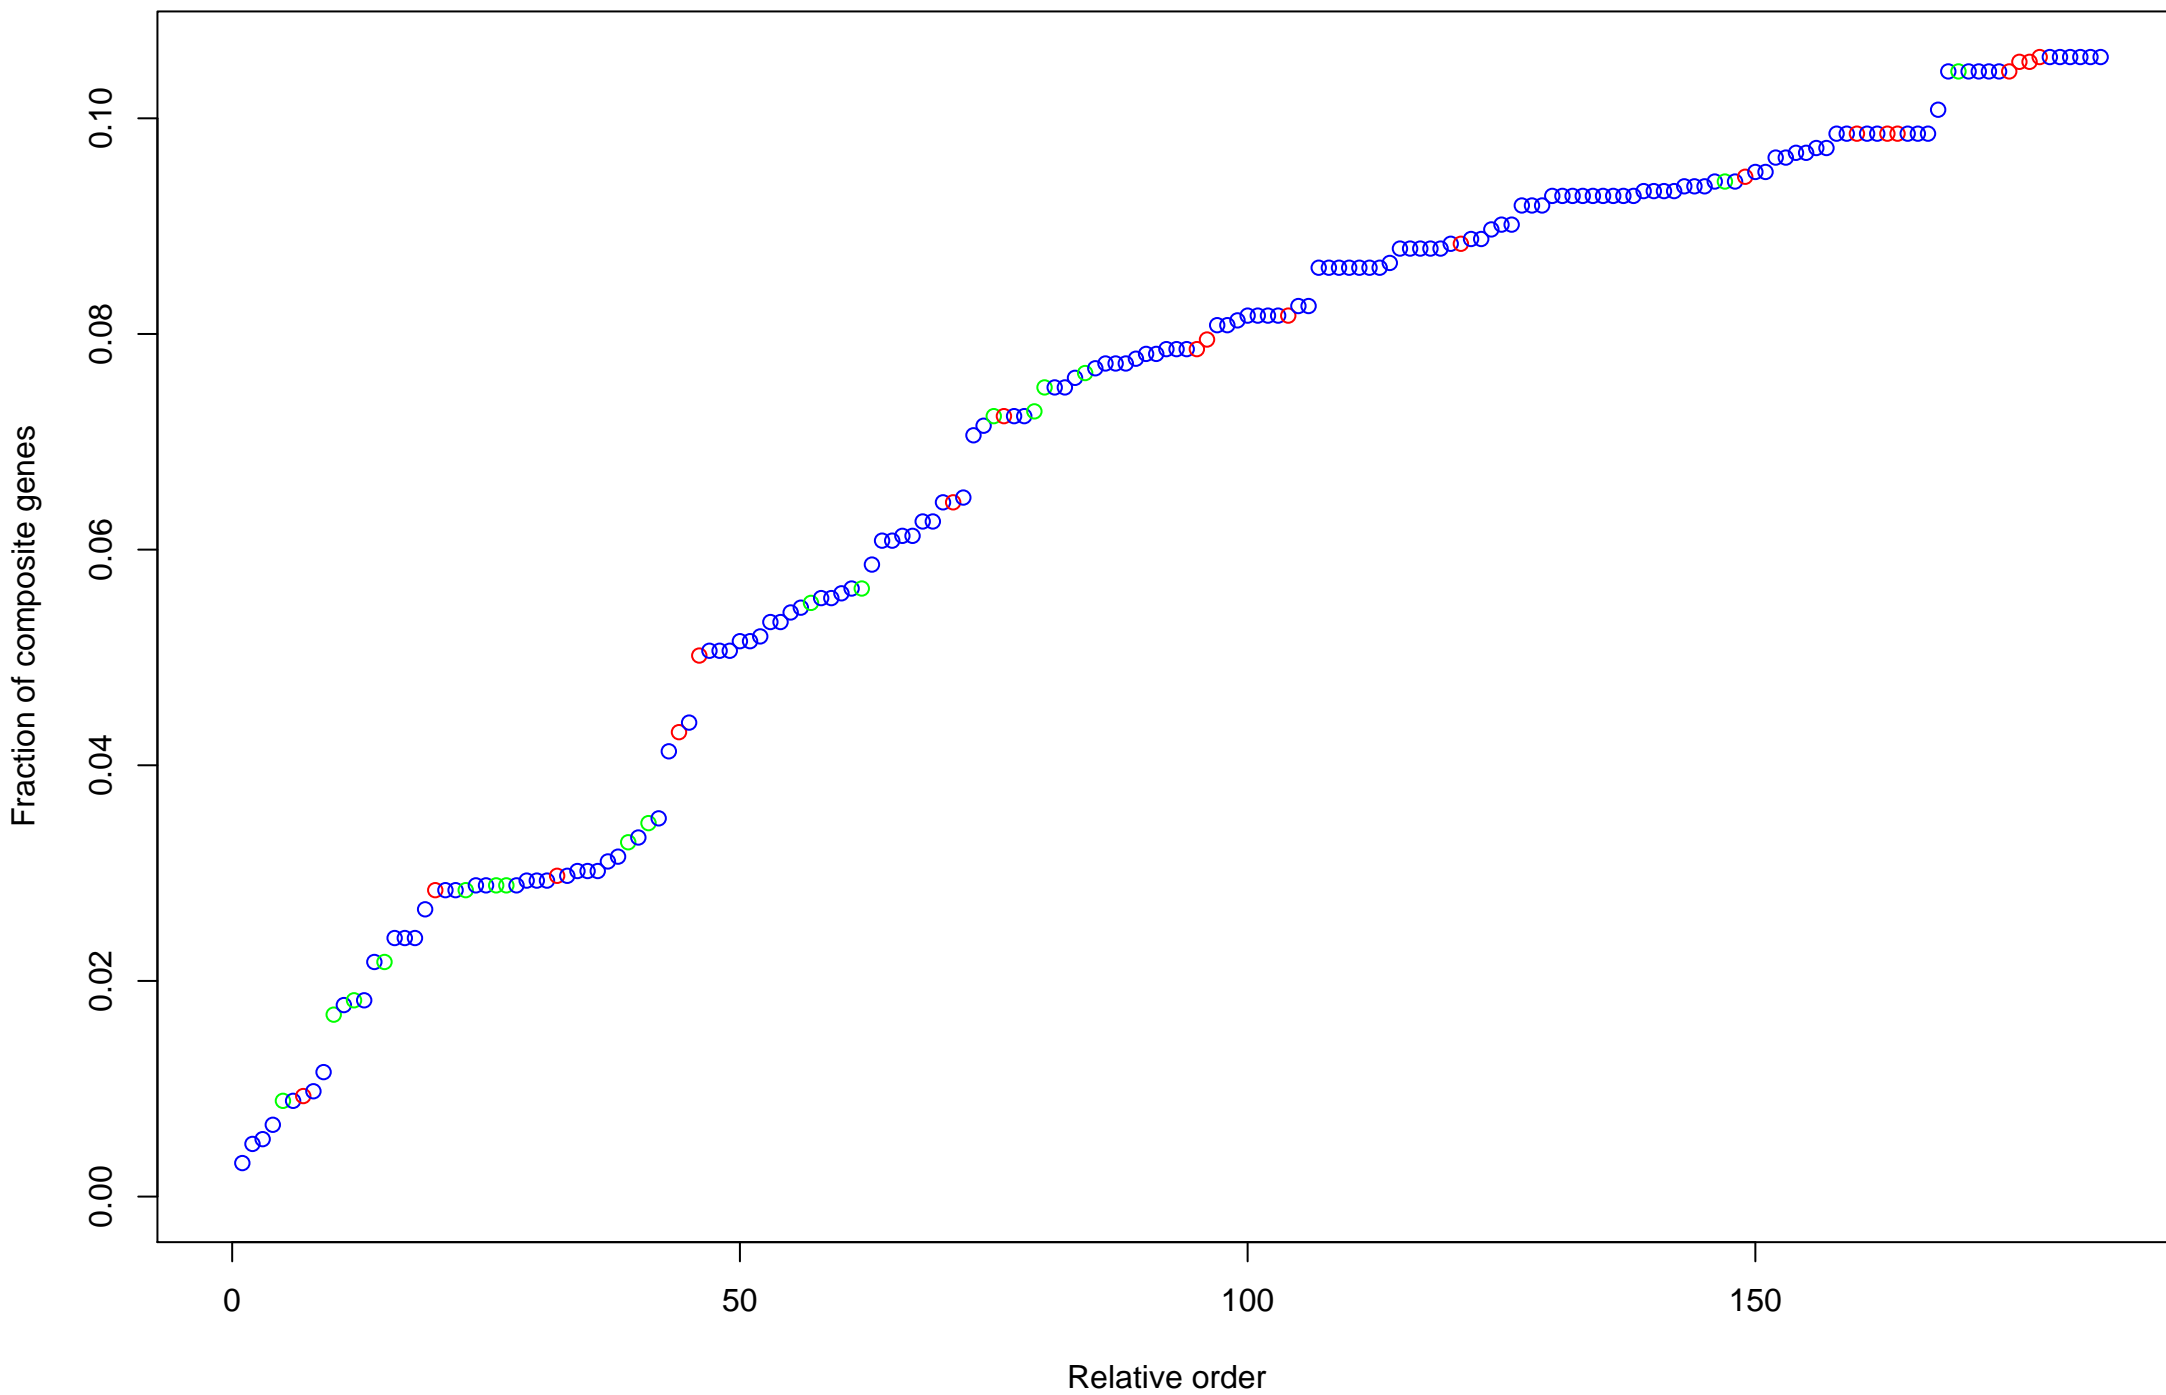



# SPYO-XM3-01 (Streptococcus pyogenes M3)

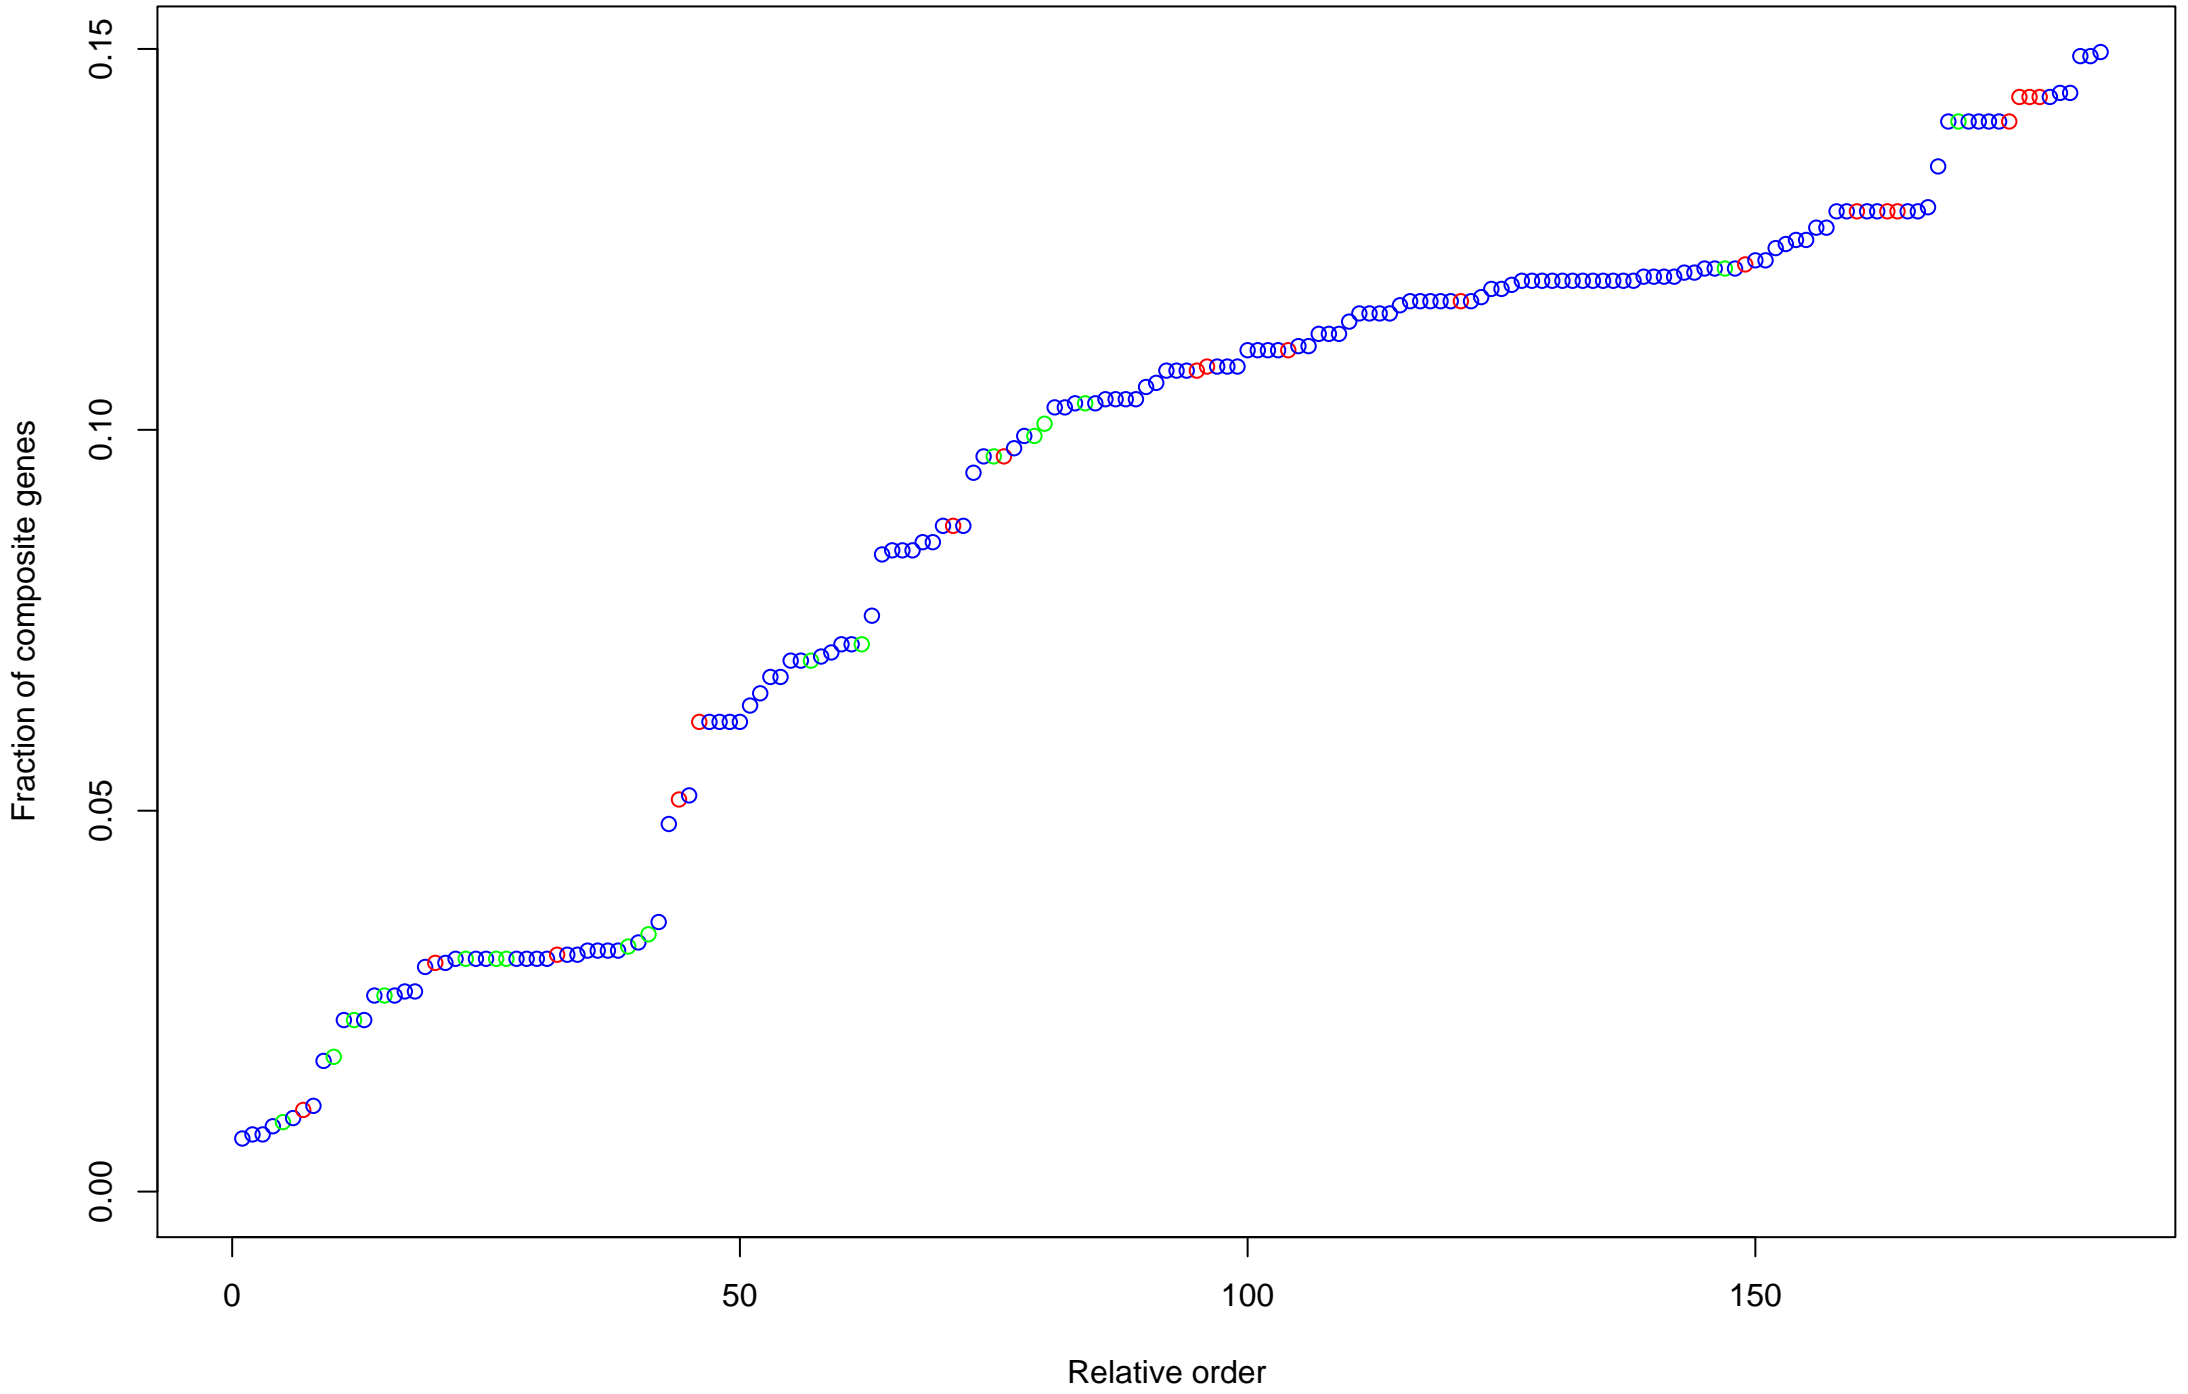

# YPES-KIM-01 (*Yersinia pestis*)

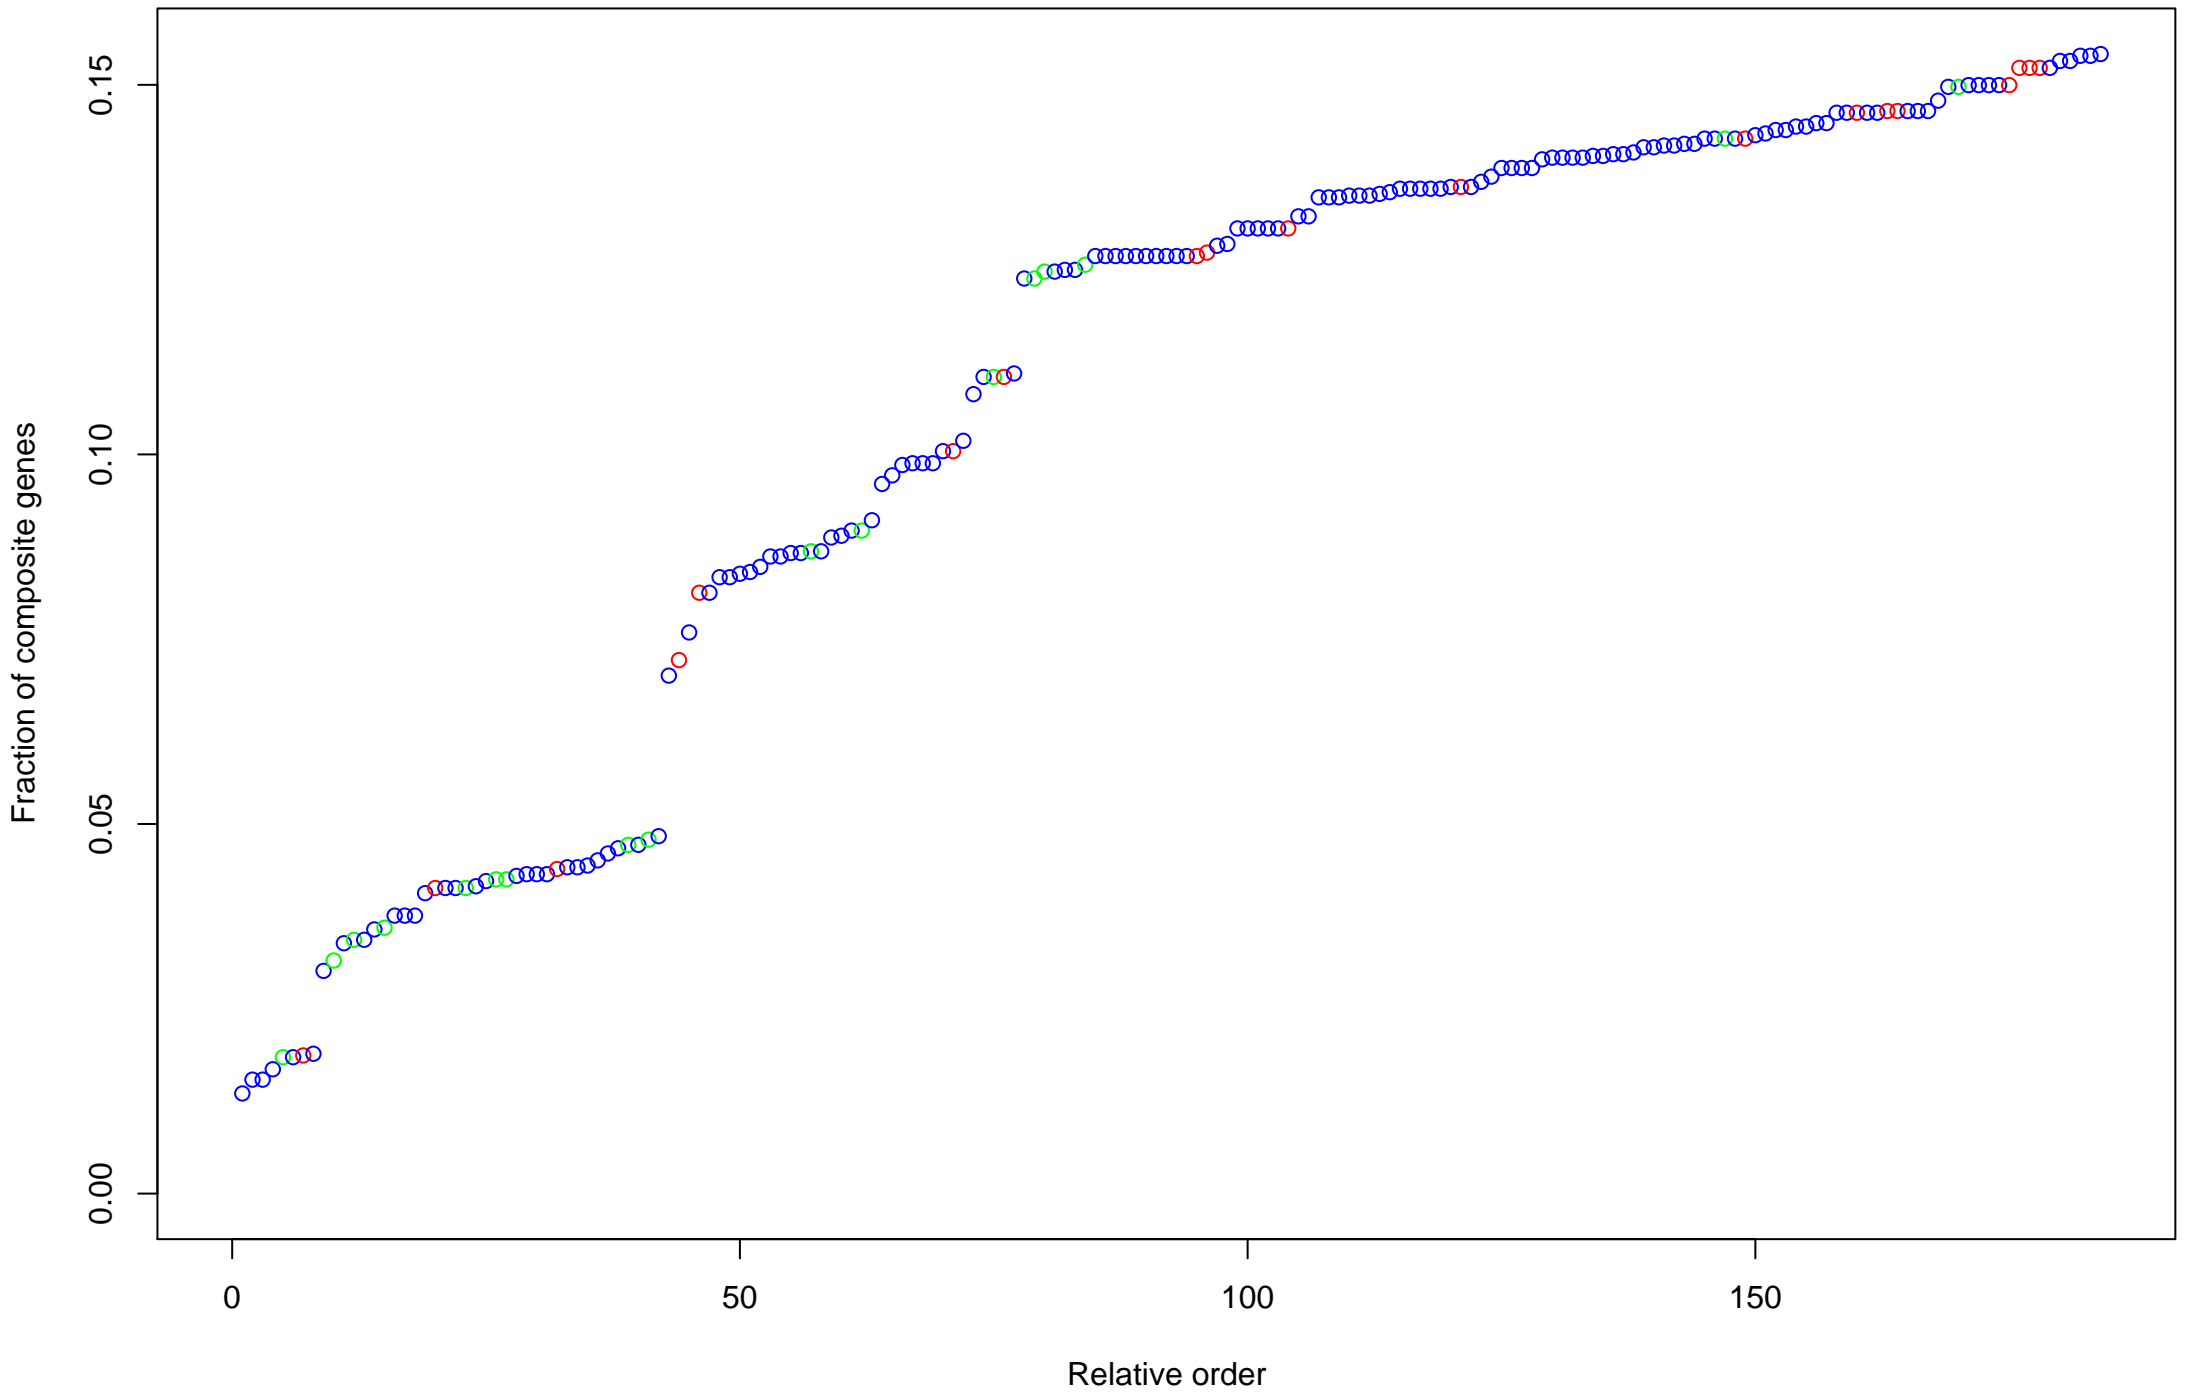

# TELO-BP1-01 (*Thermosynechococcus elongatus*)

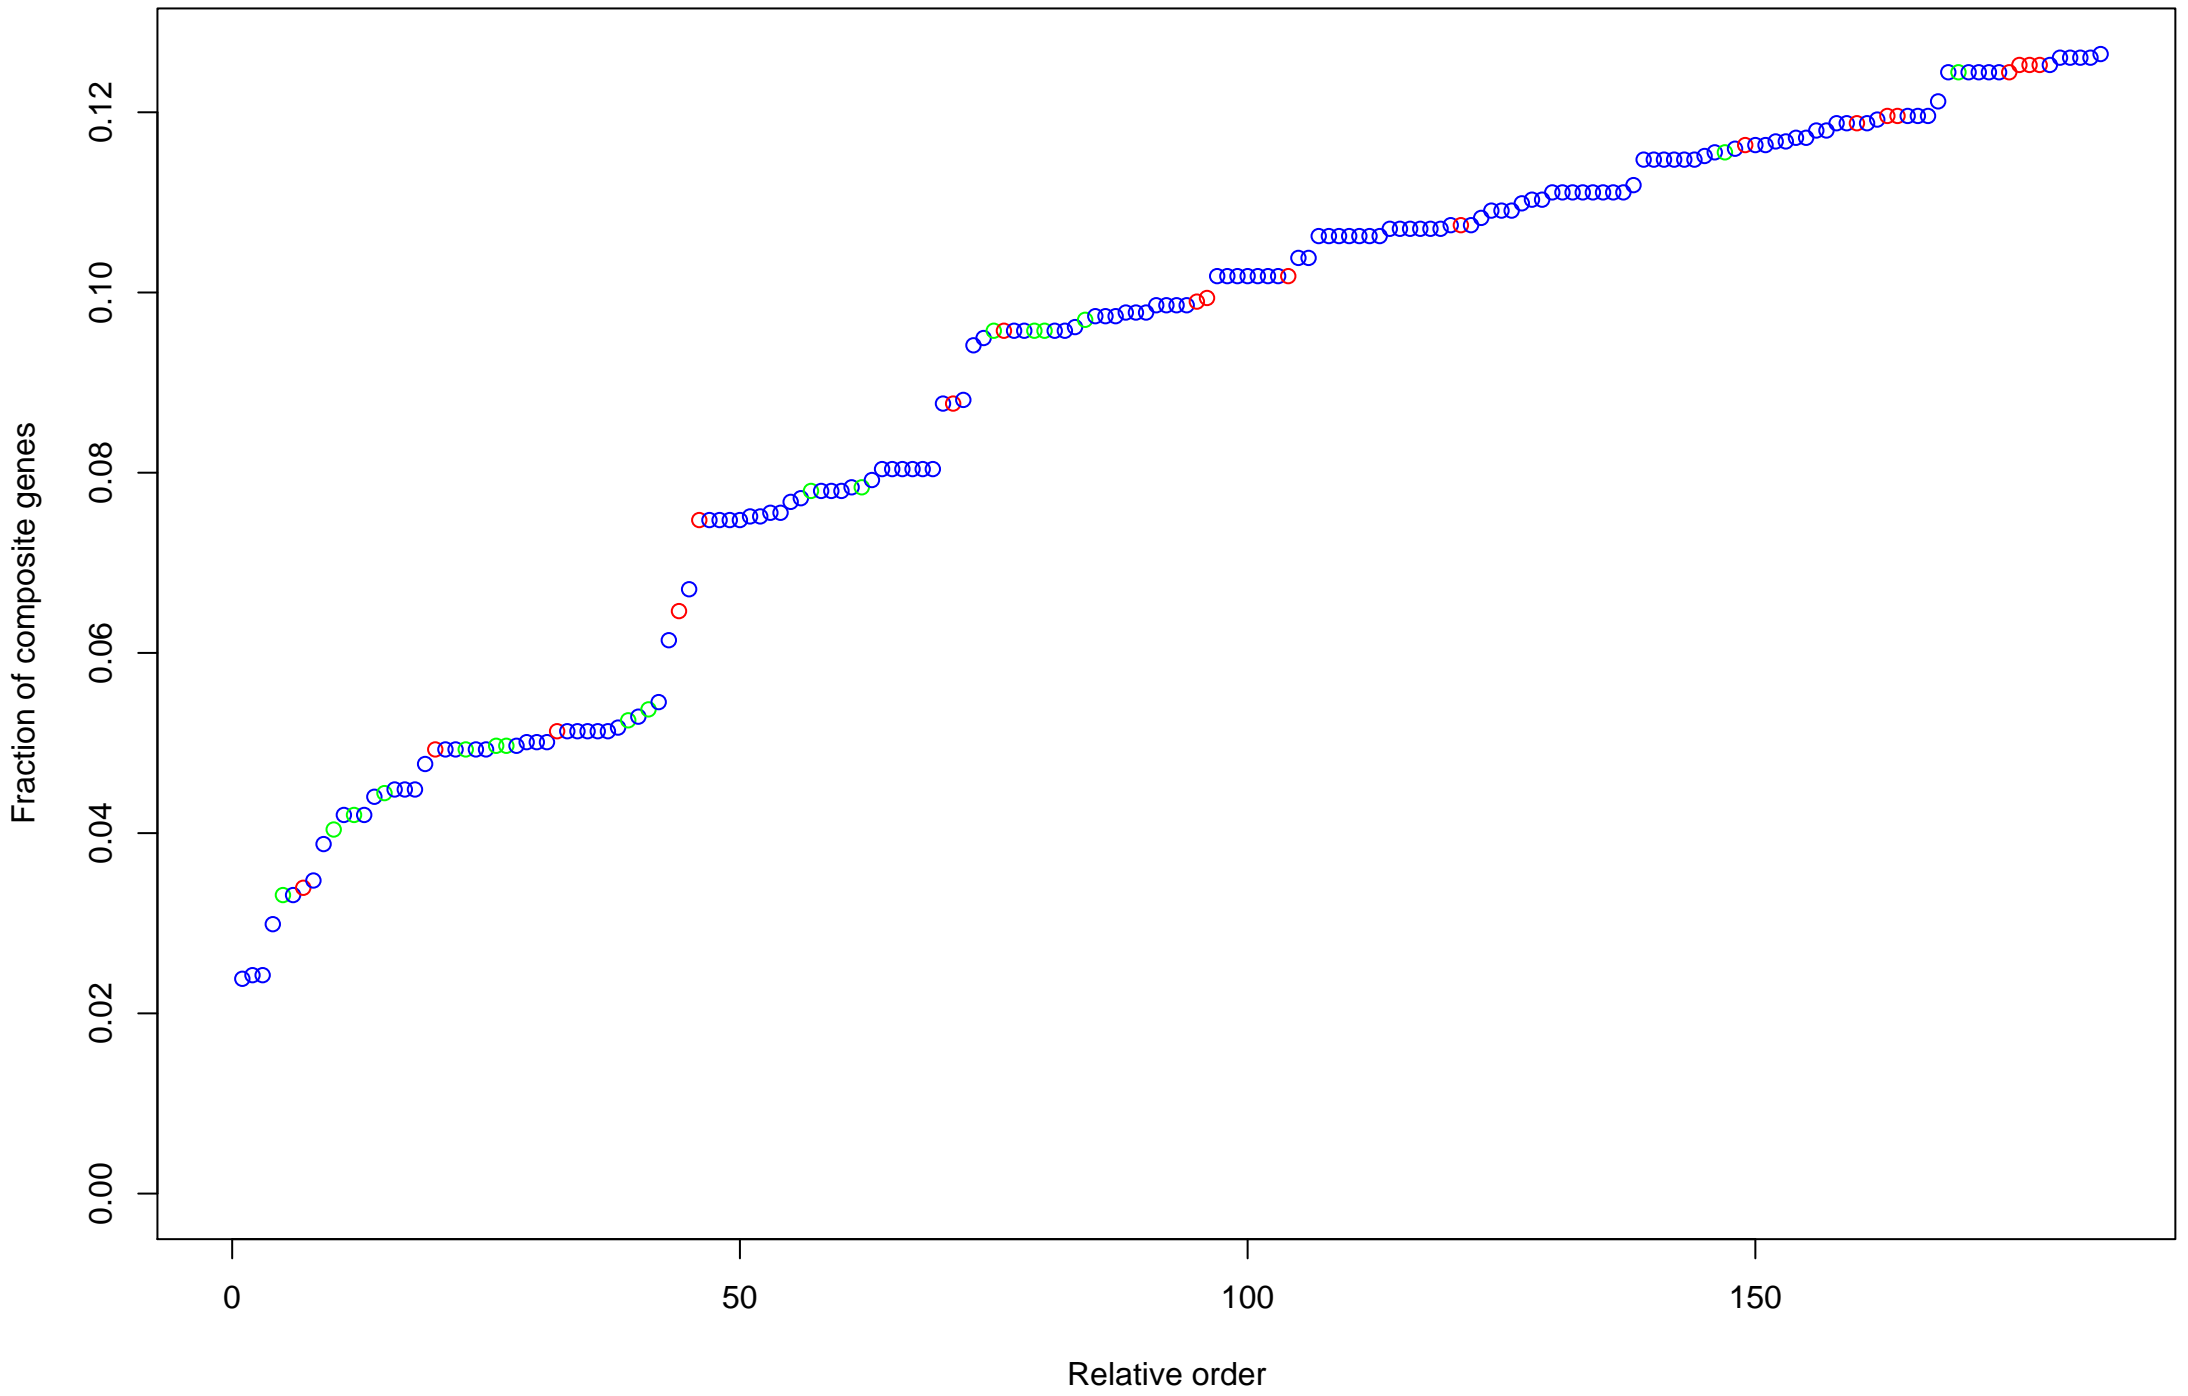

# SAGA-260-01 (*Streptococcus agalactiae*)

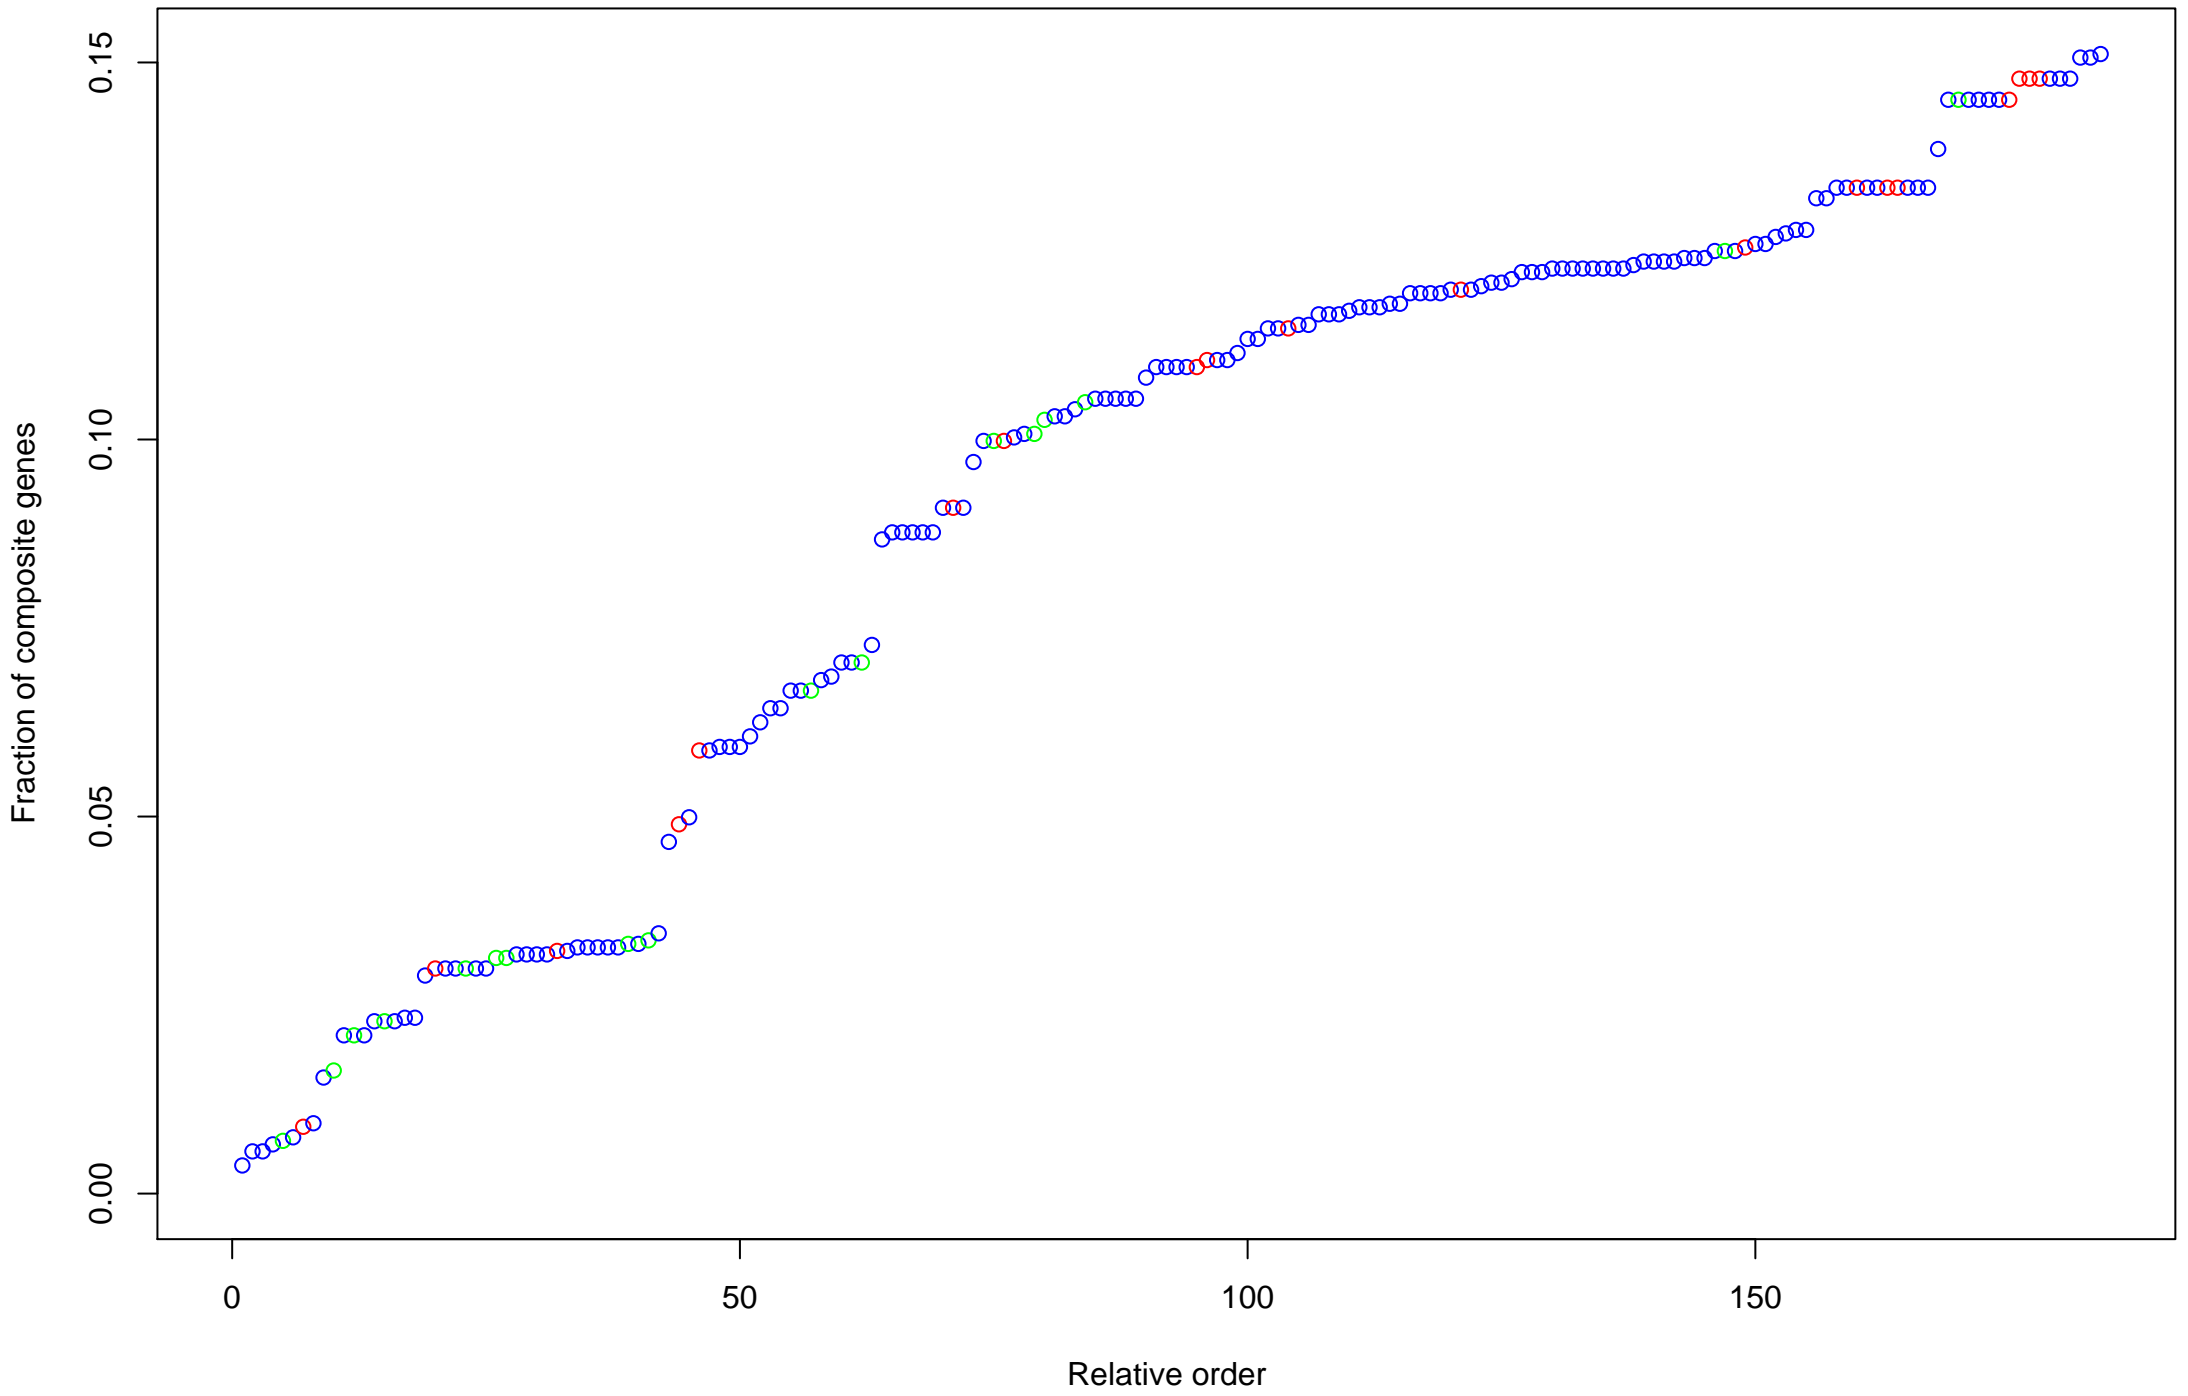

# OIHE-HET-01 (*Oceanobacillus iheyensis*)

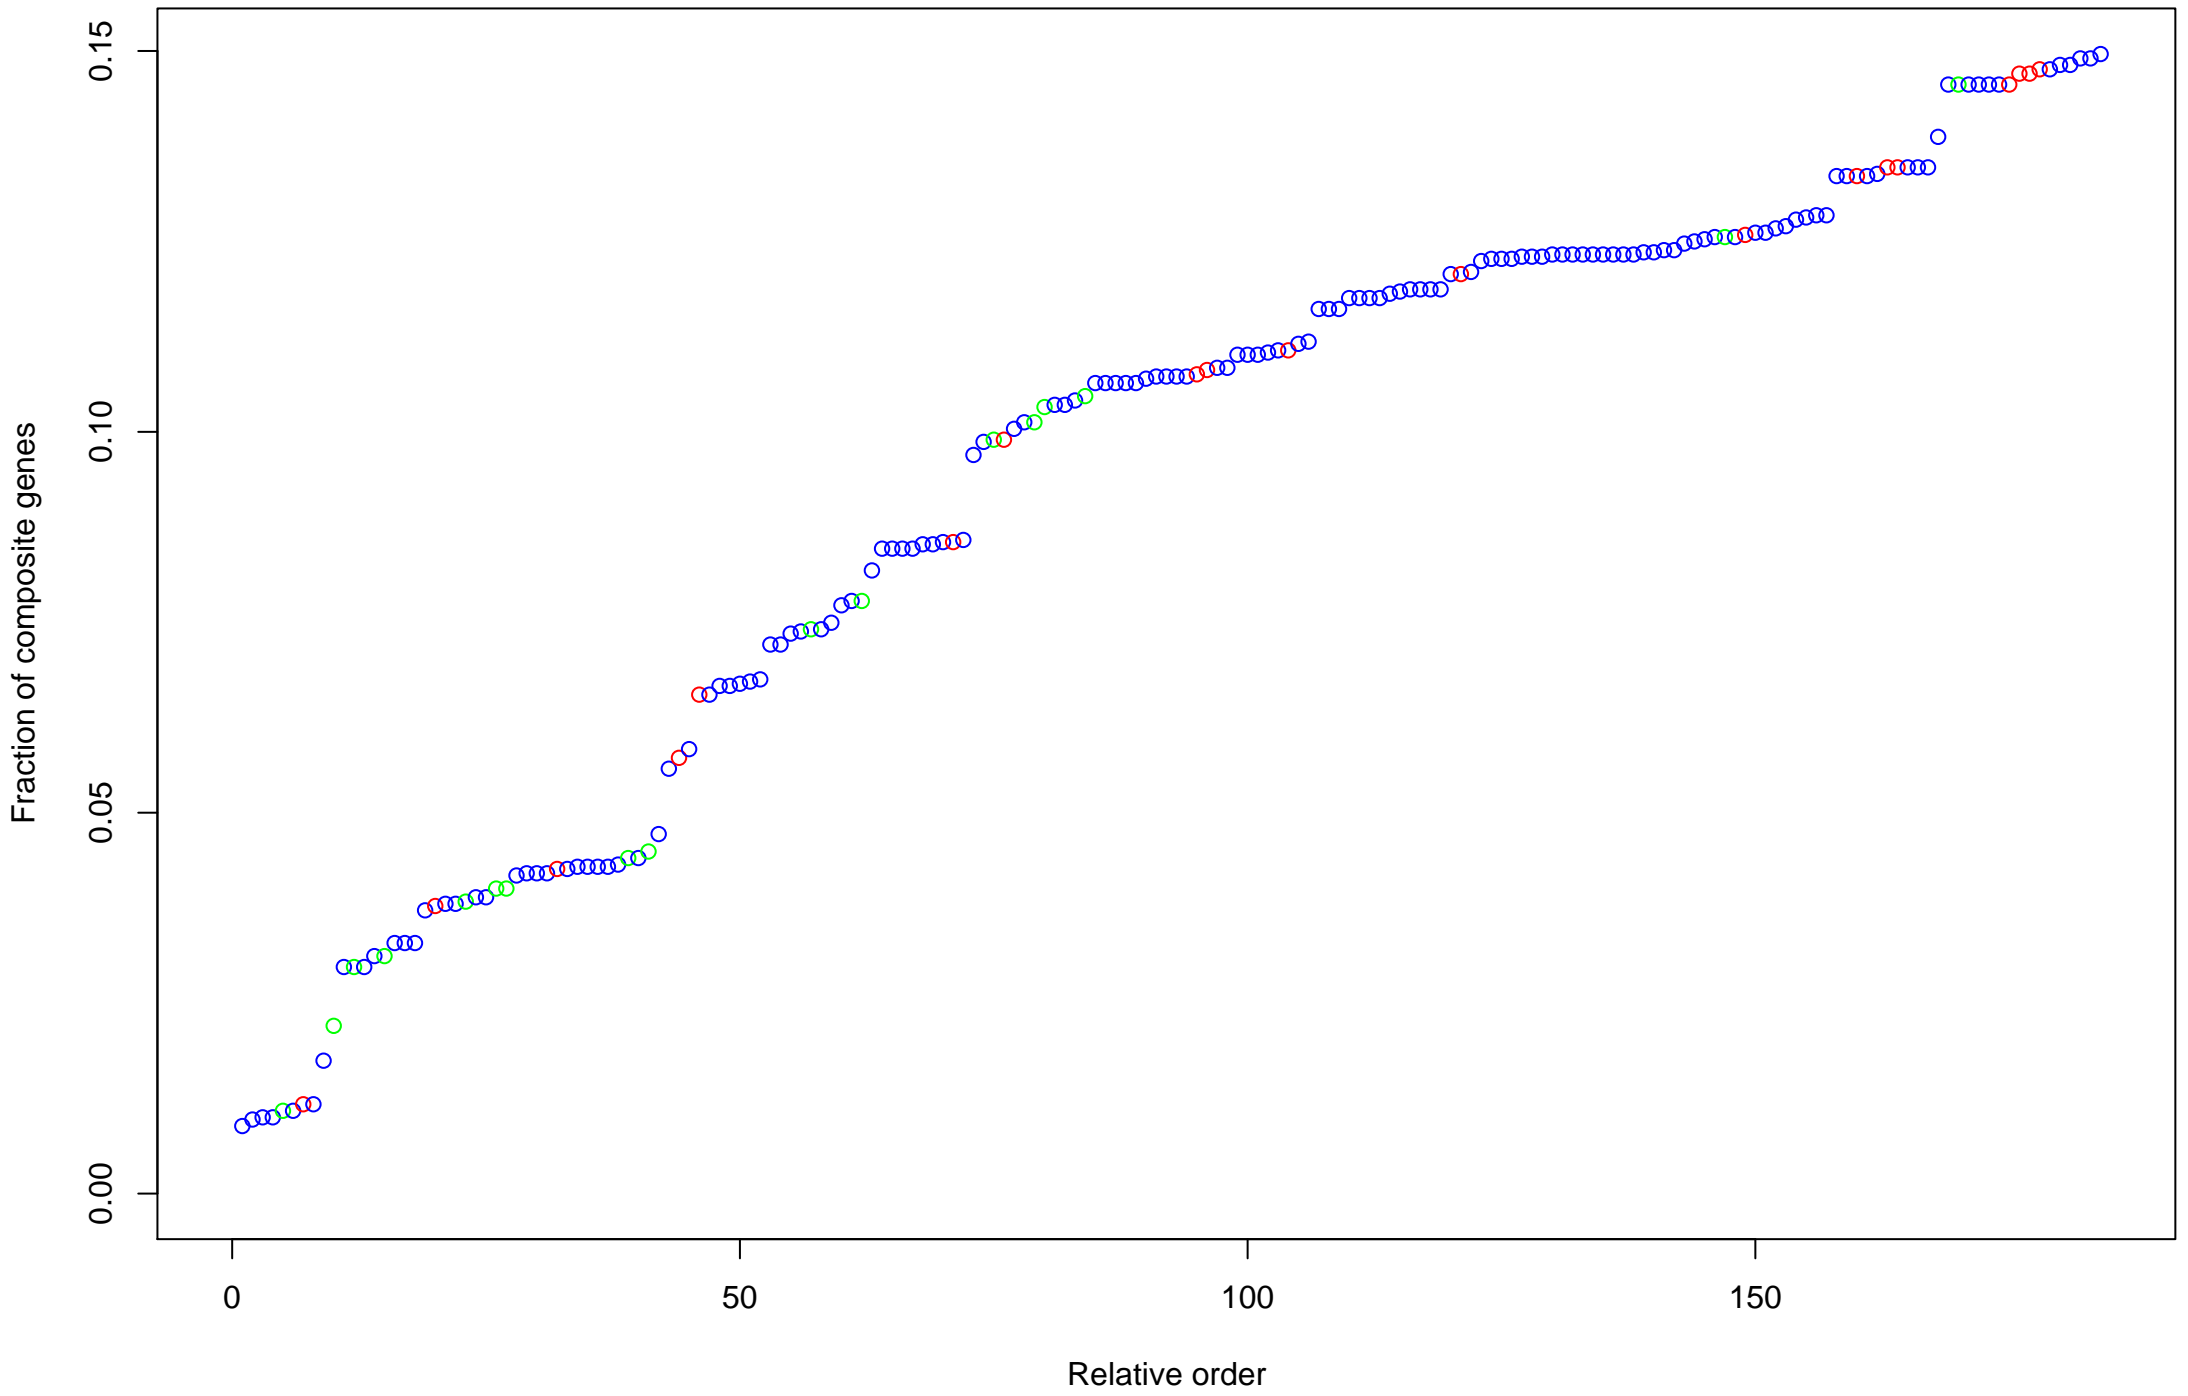

# BSUI-133-01 (*Brucella suis*)

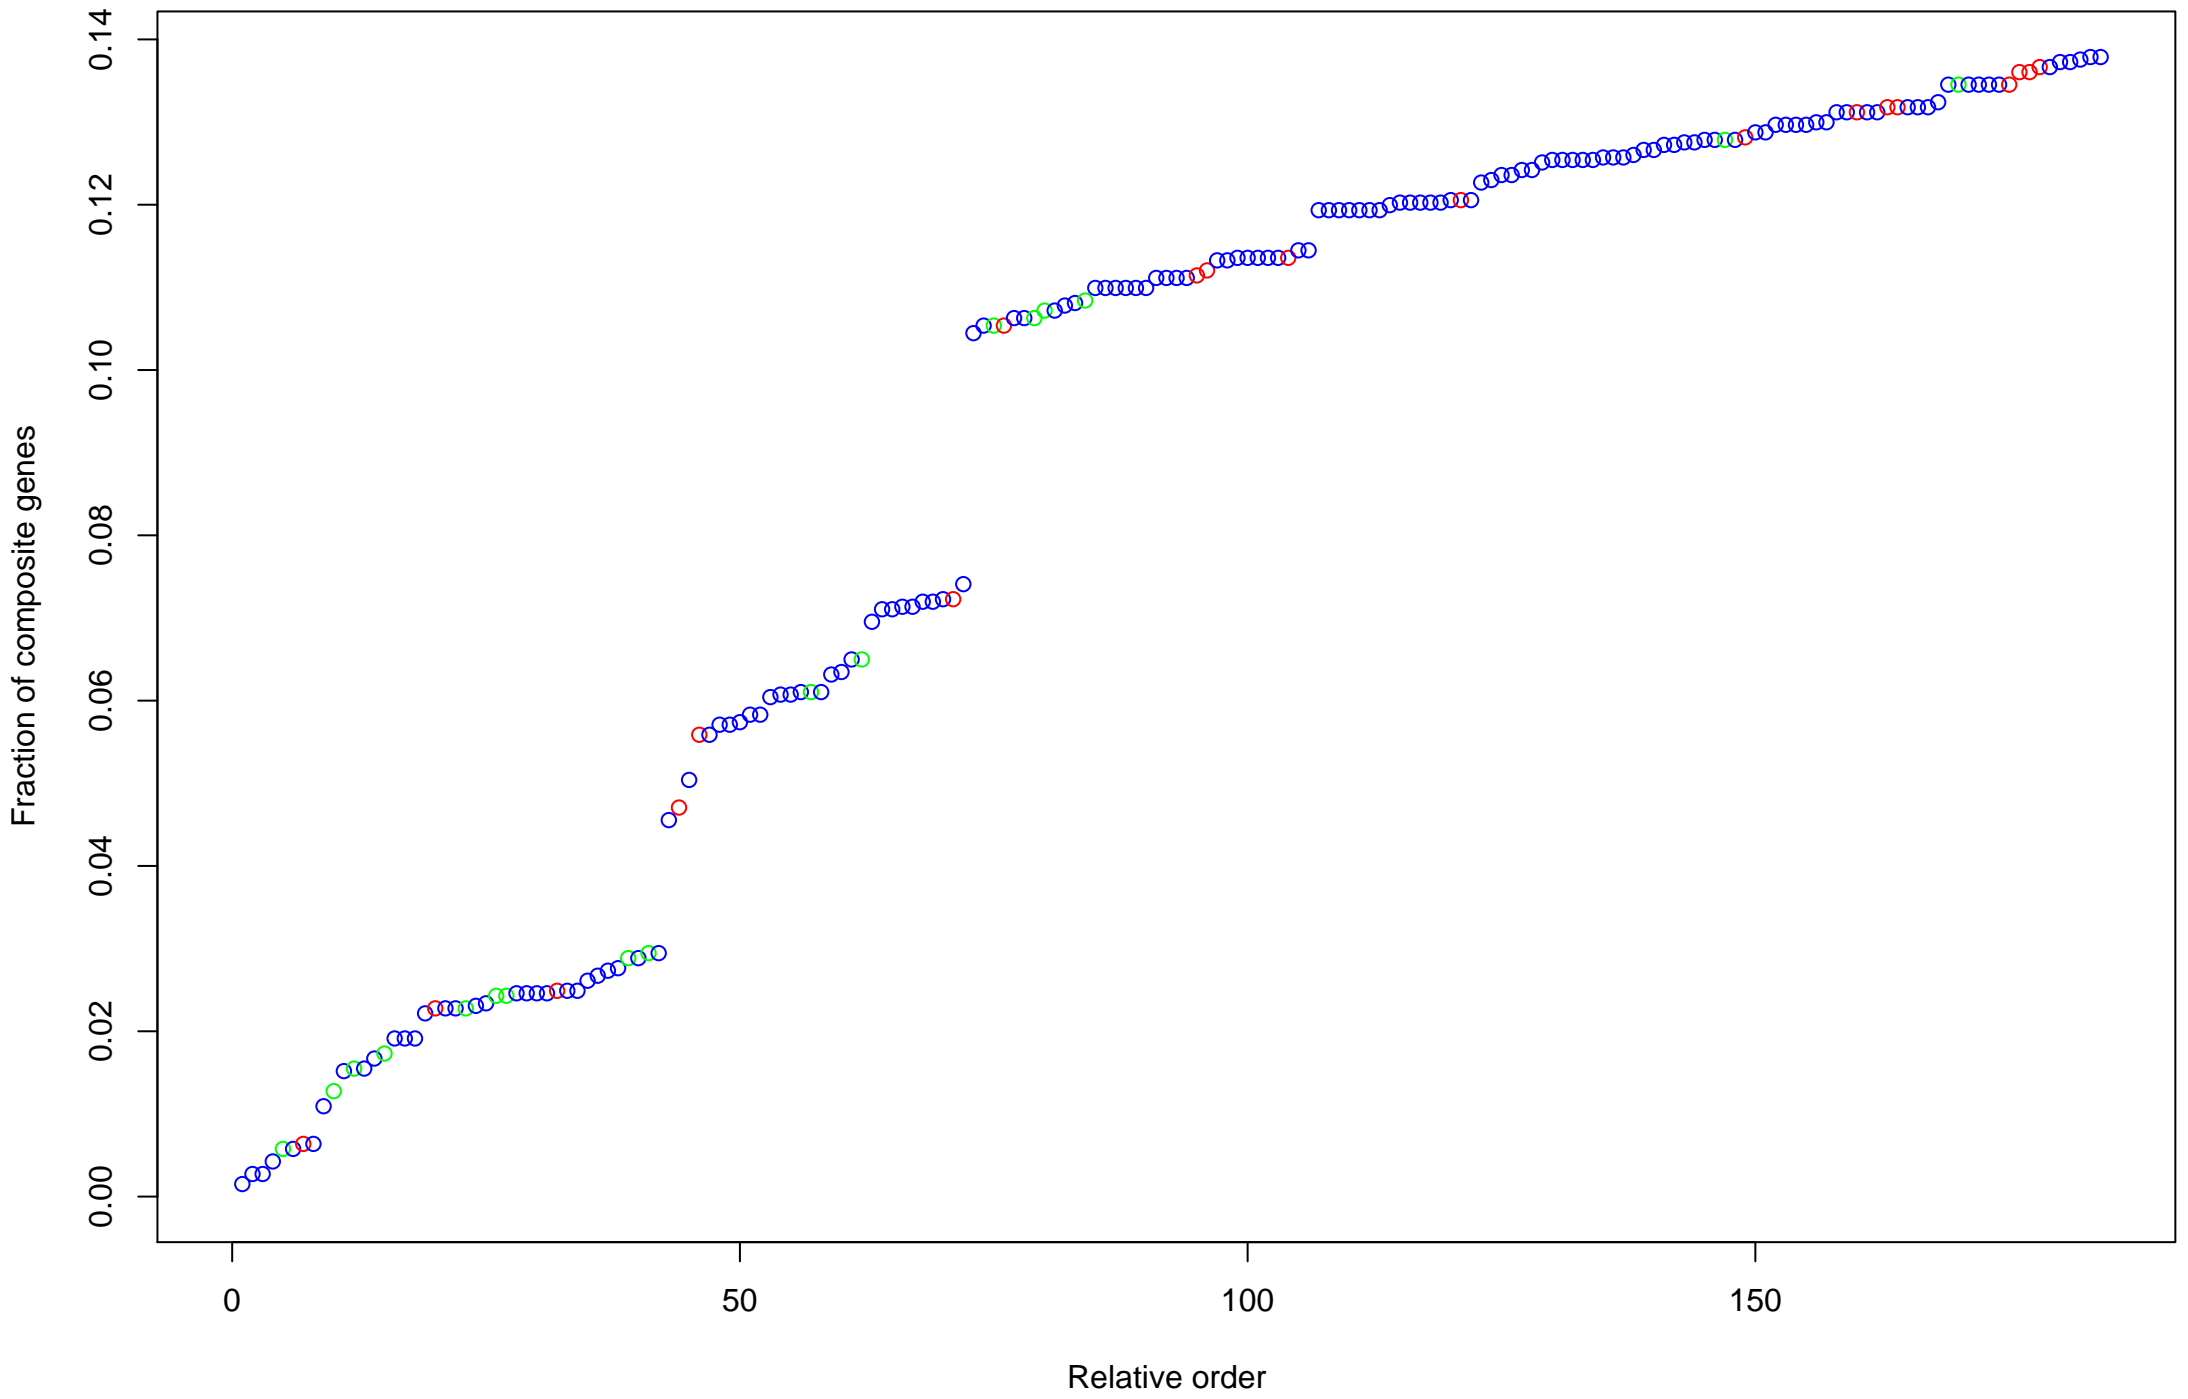

# PFAL-3D7-01 (*Plasmodium falciparum*)

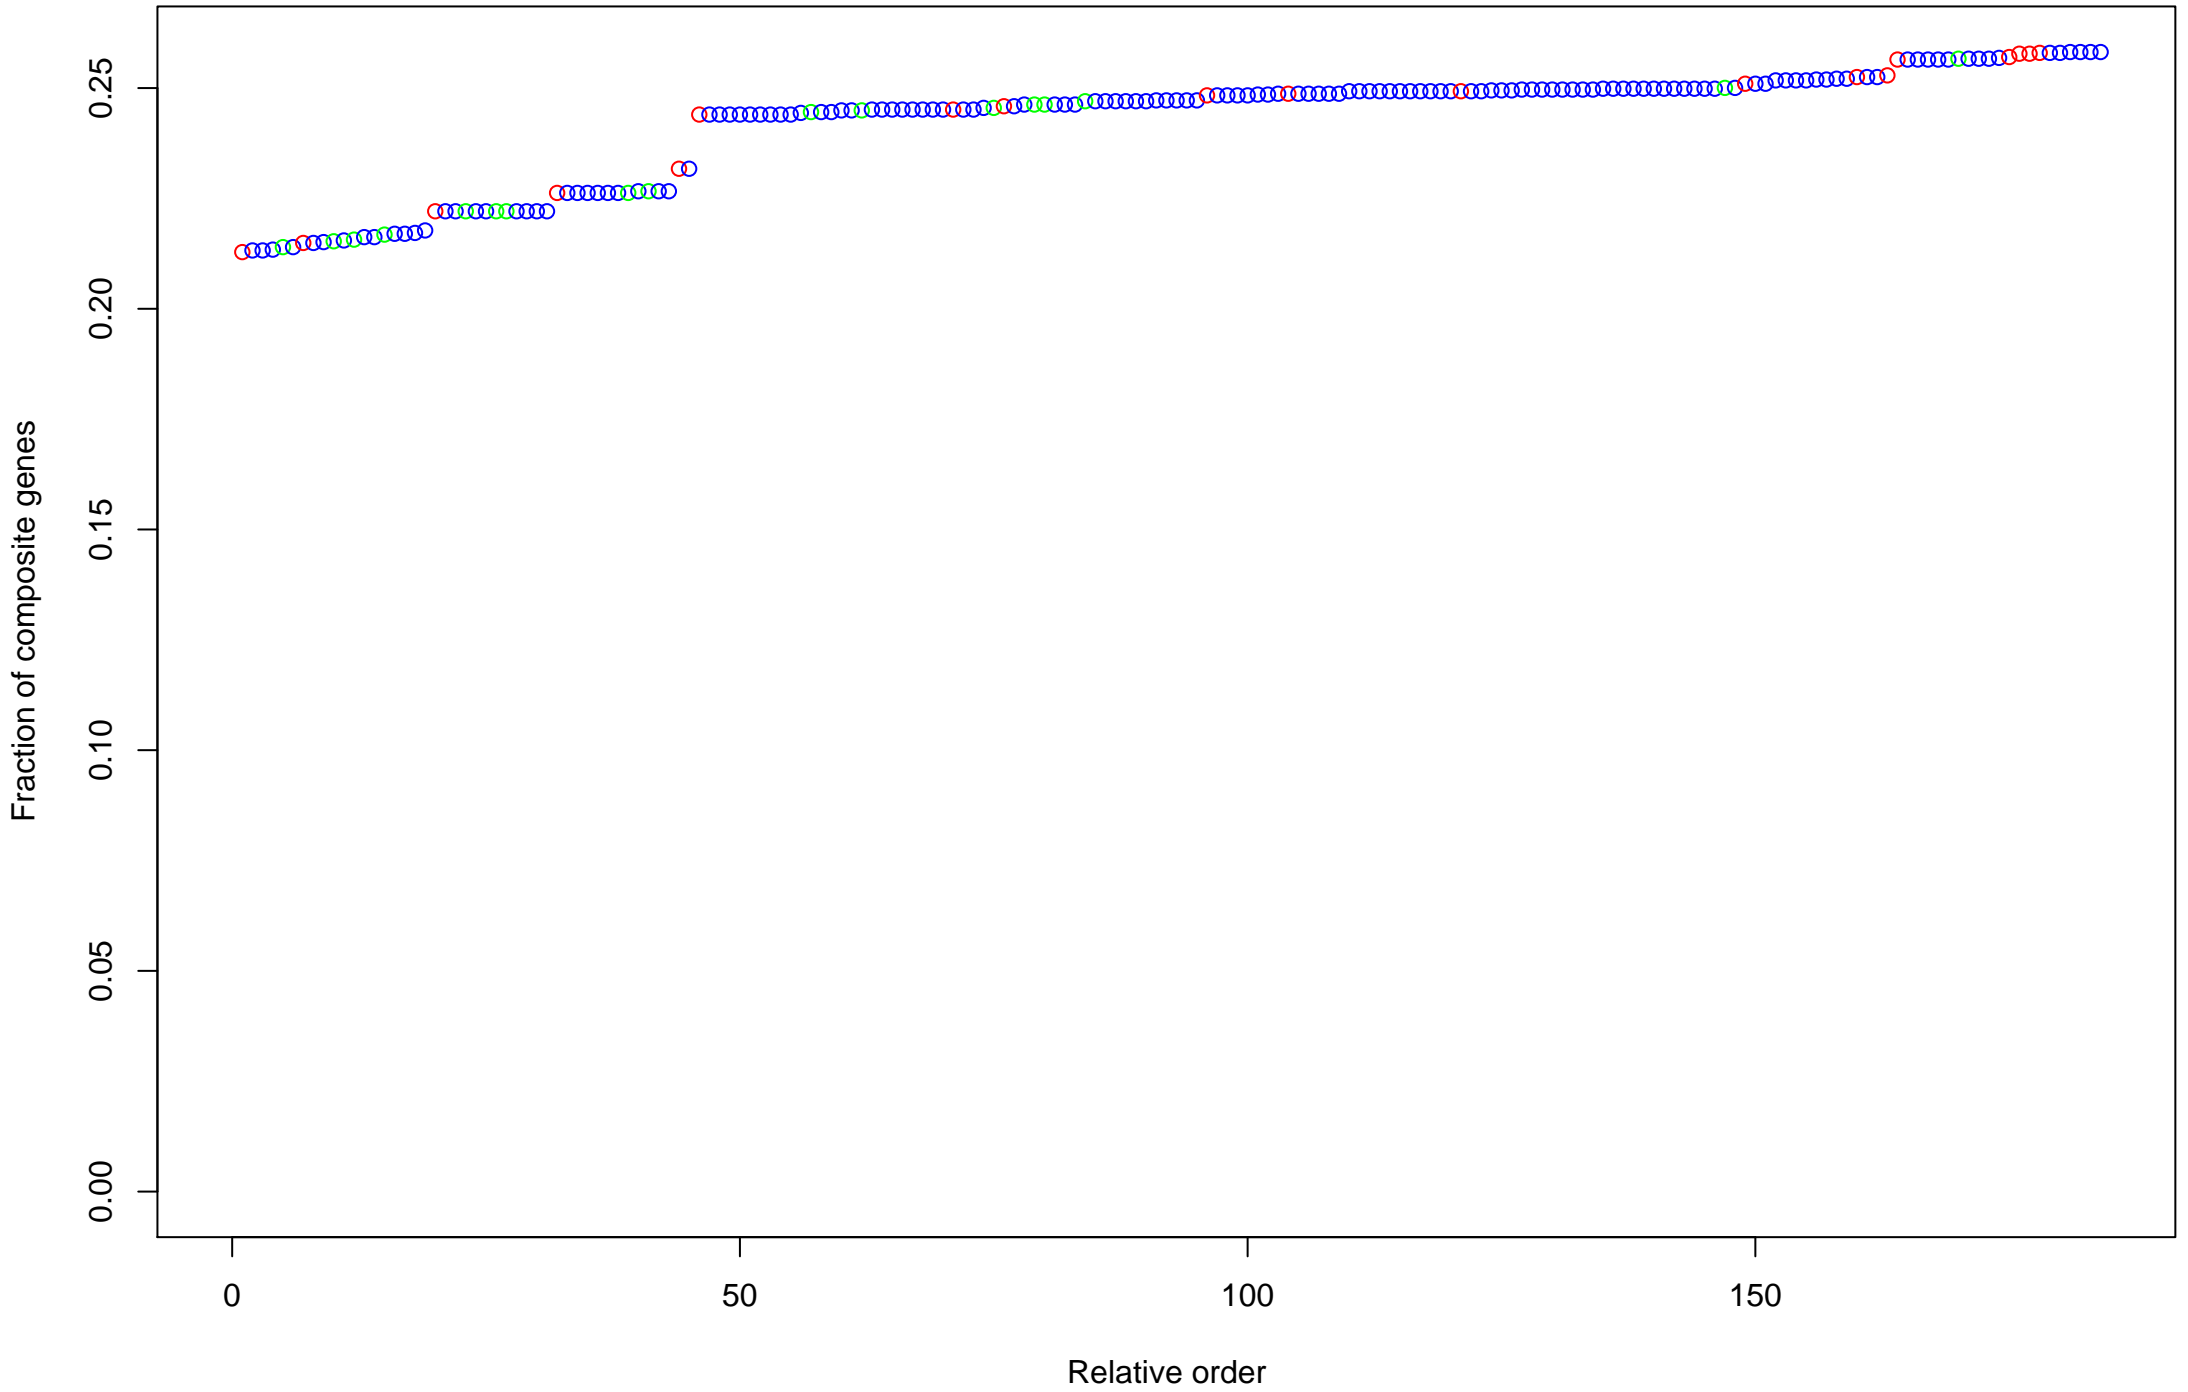

# AGAM-PES-01 (*Anopheles gambiae*)

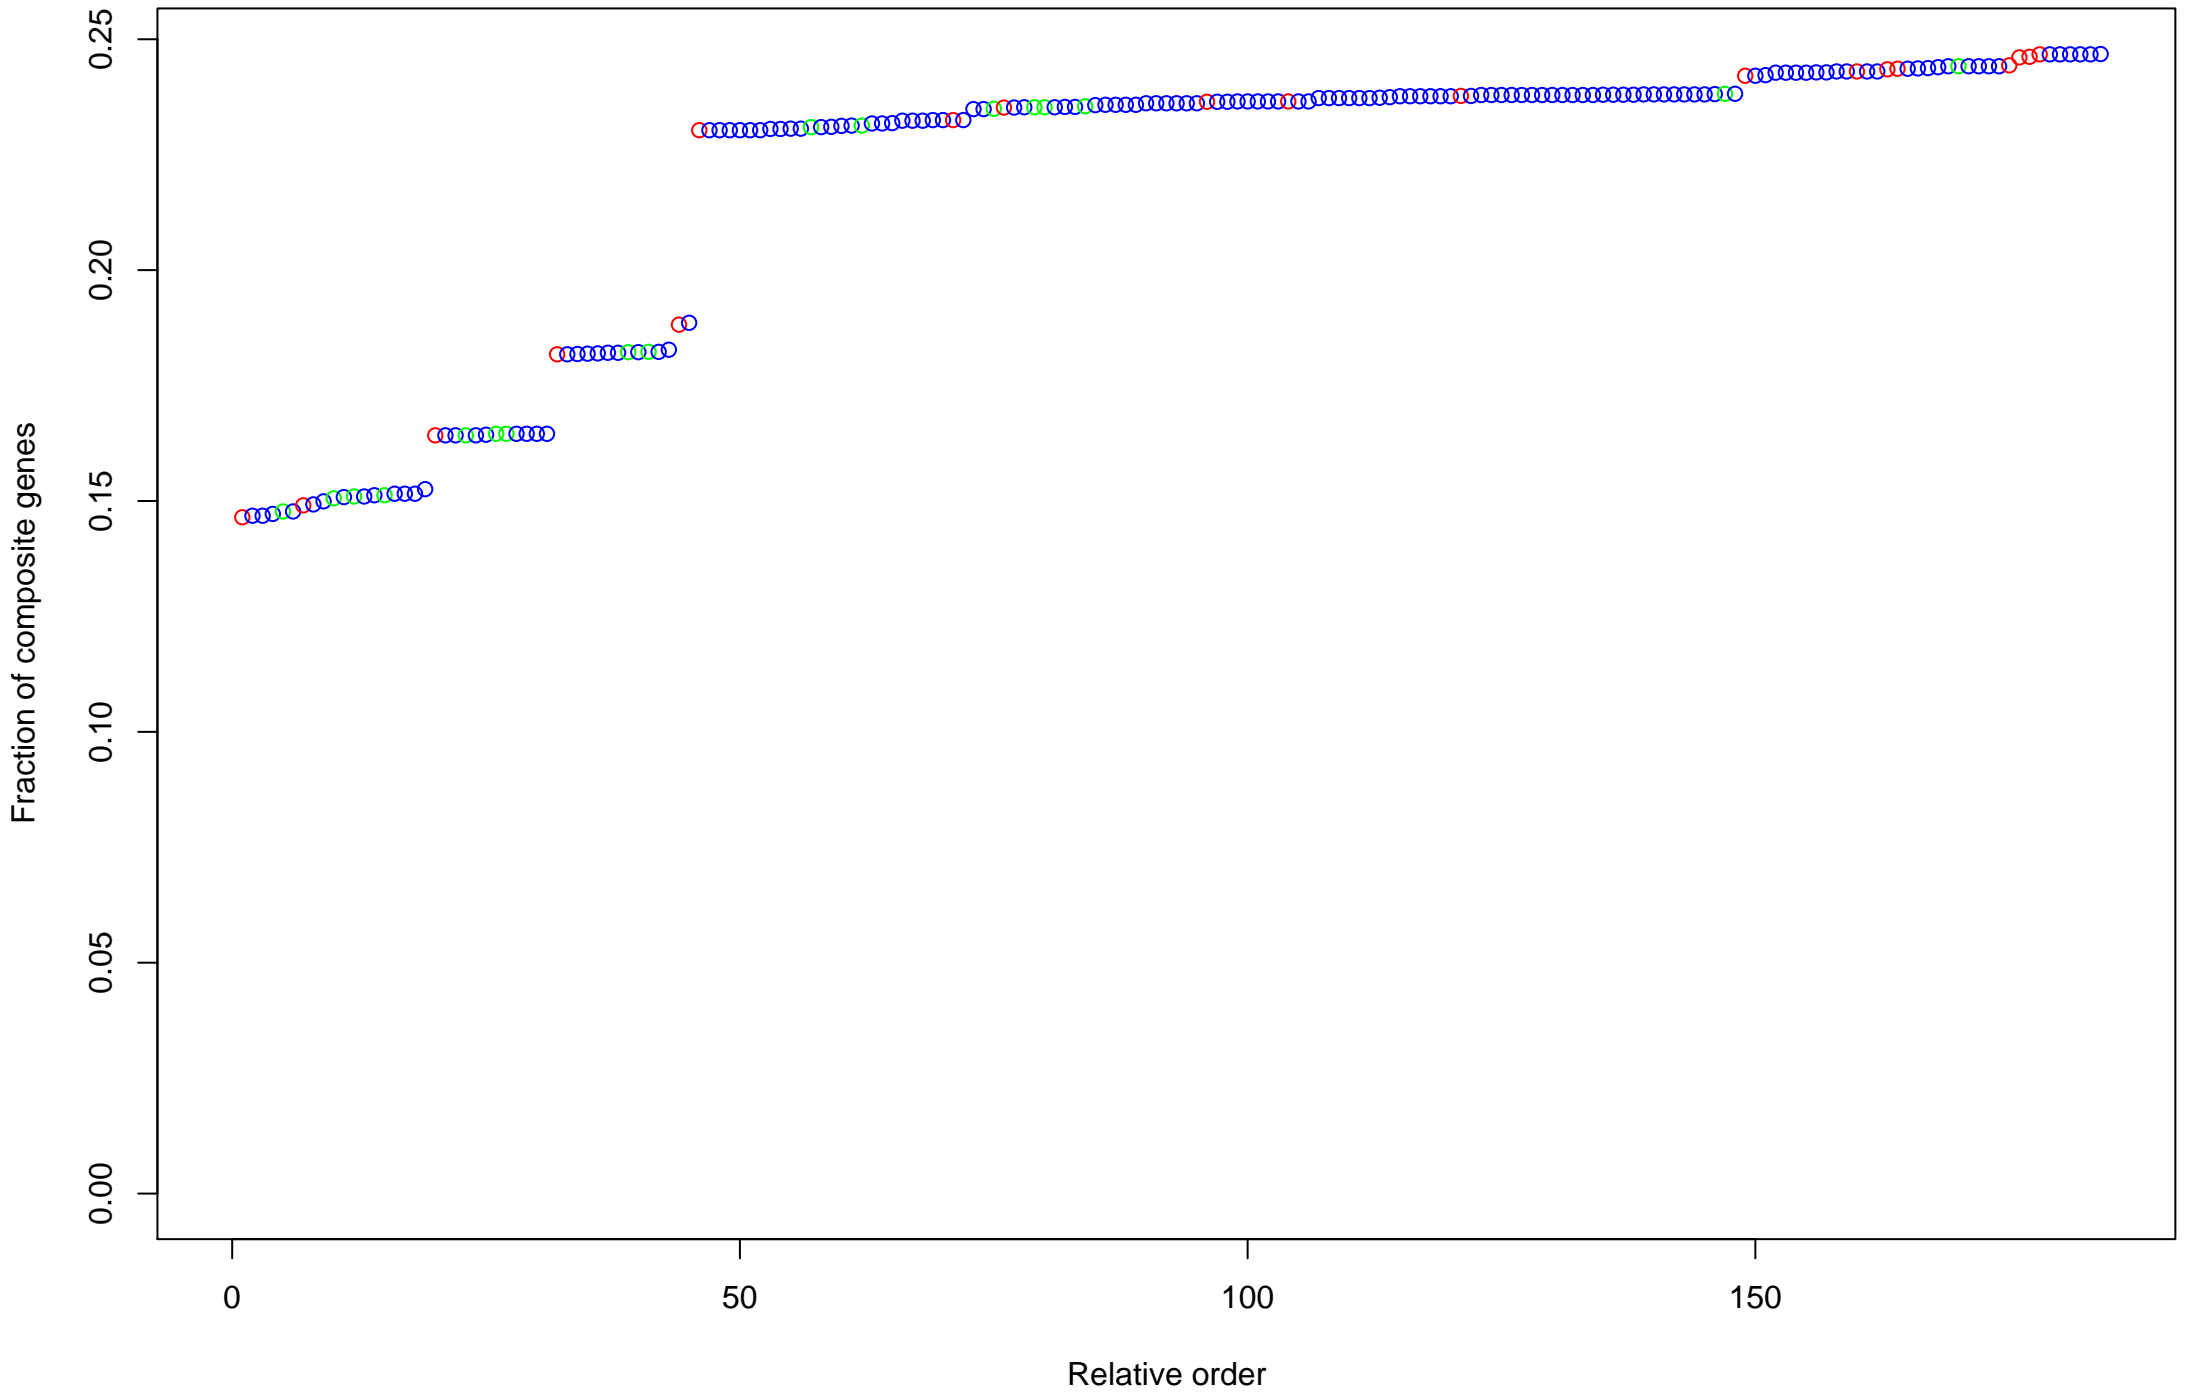



# SONE-MR1-01 (*Shewanella oneidensis*)

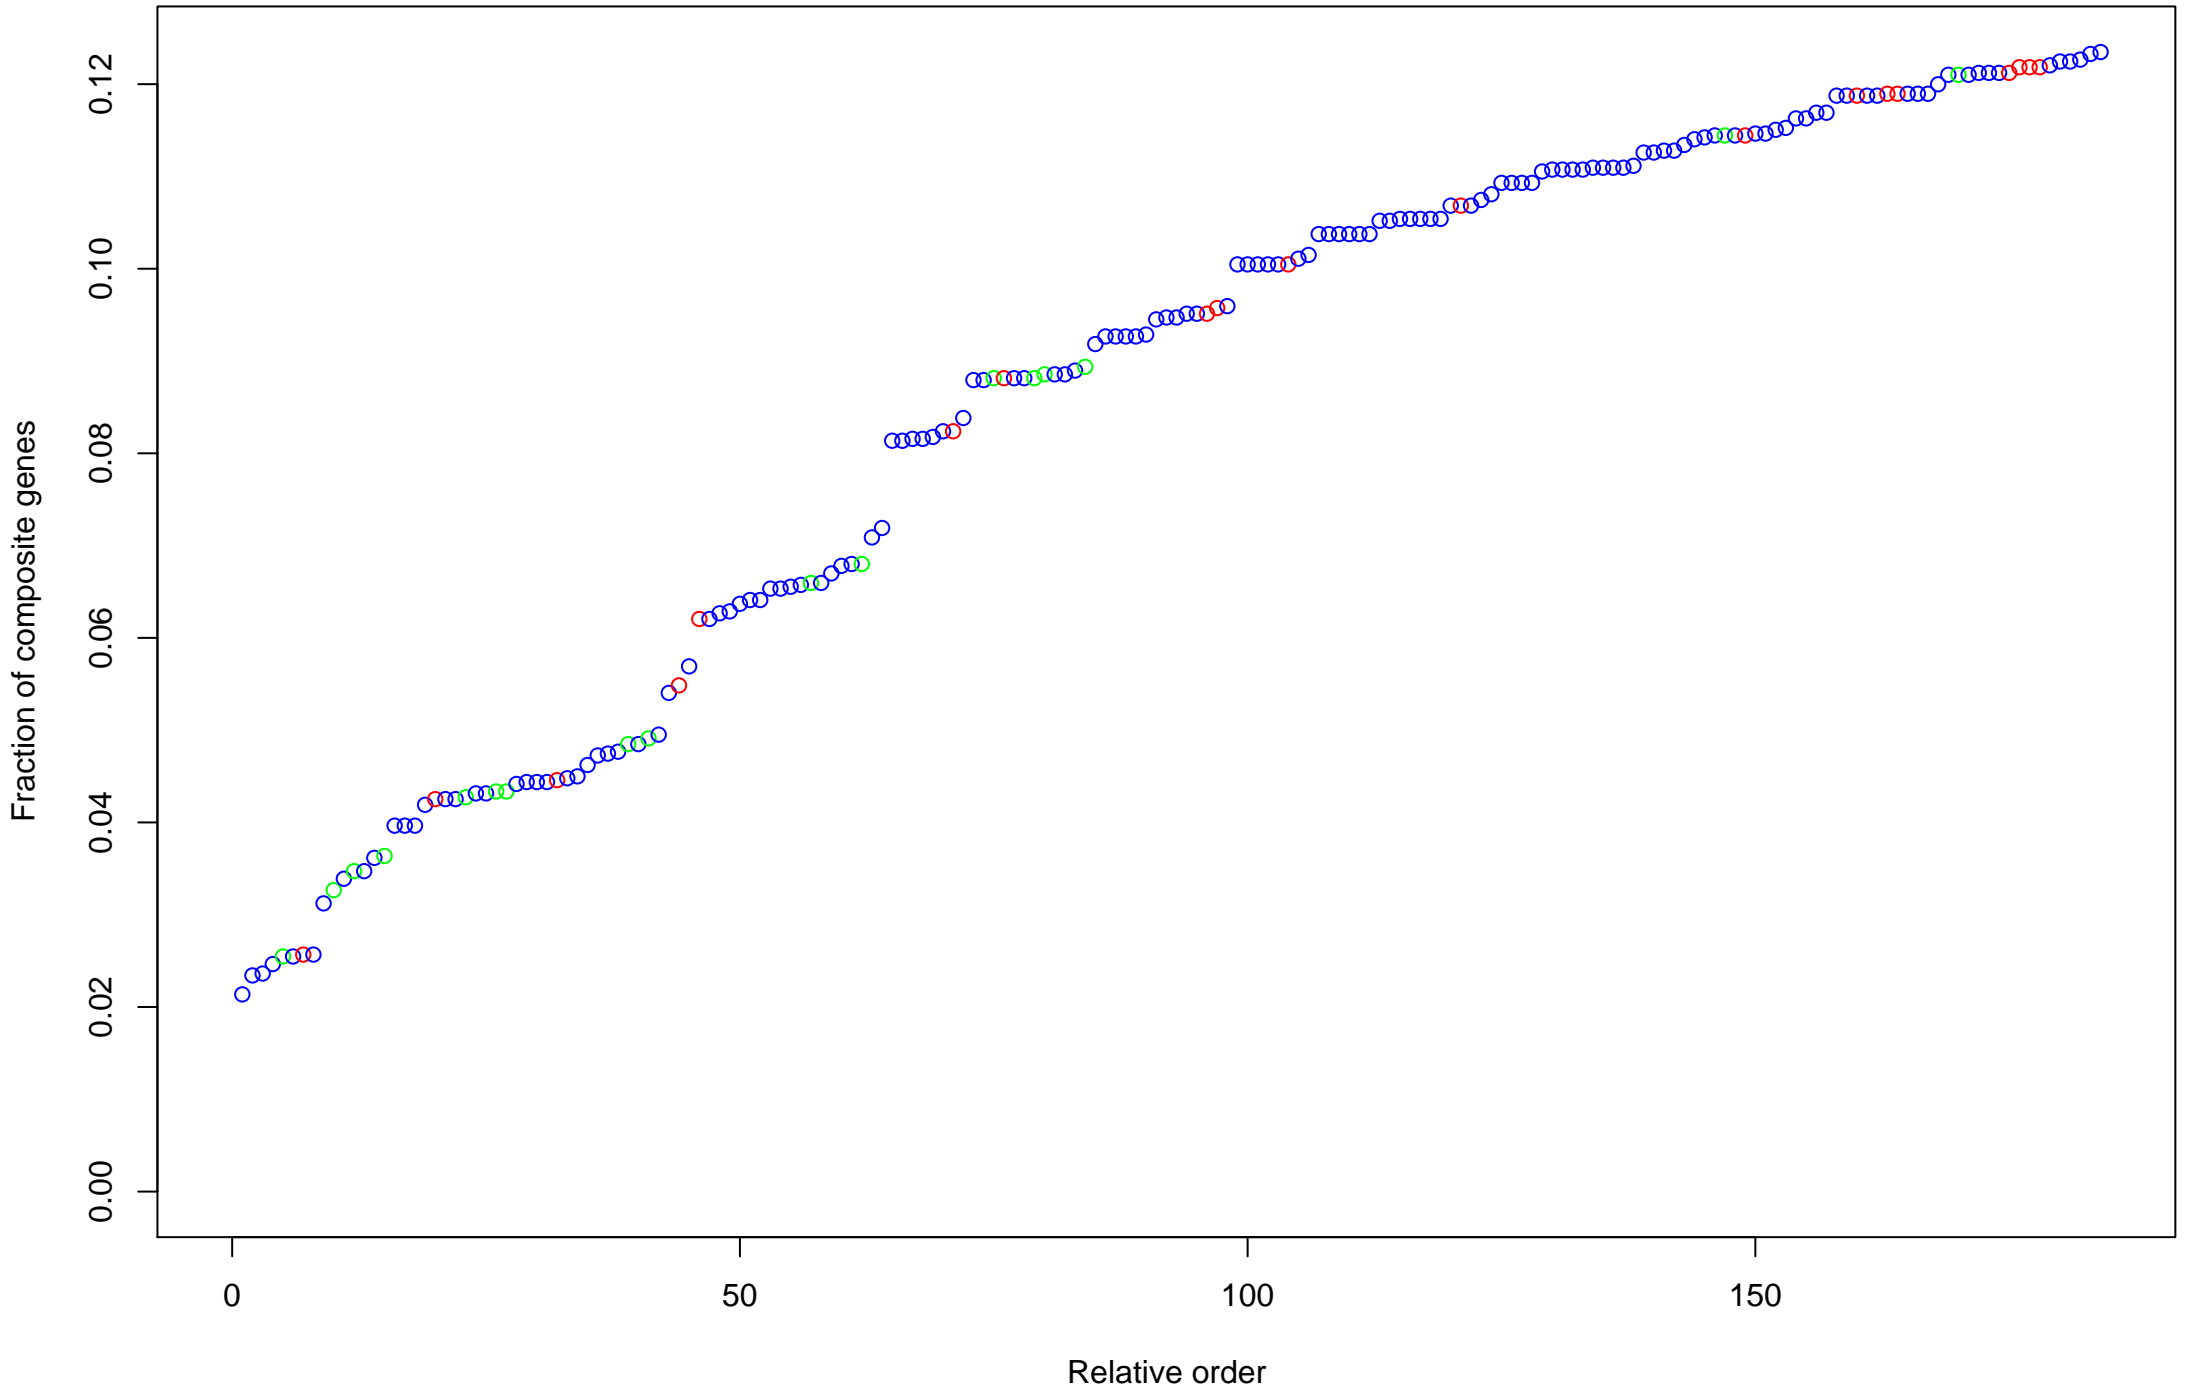

# BLON-NCC-01 (*Bifidobacterium longum*)

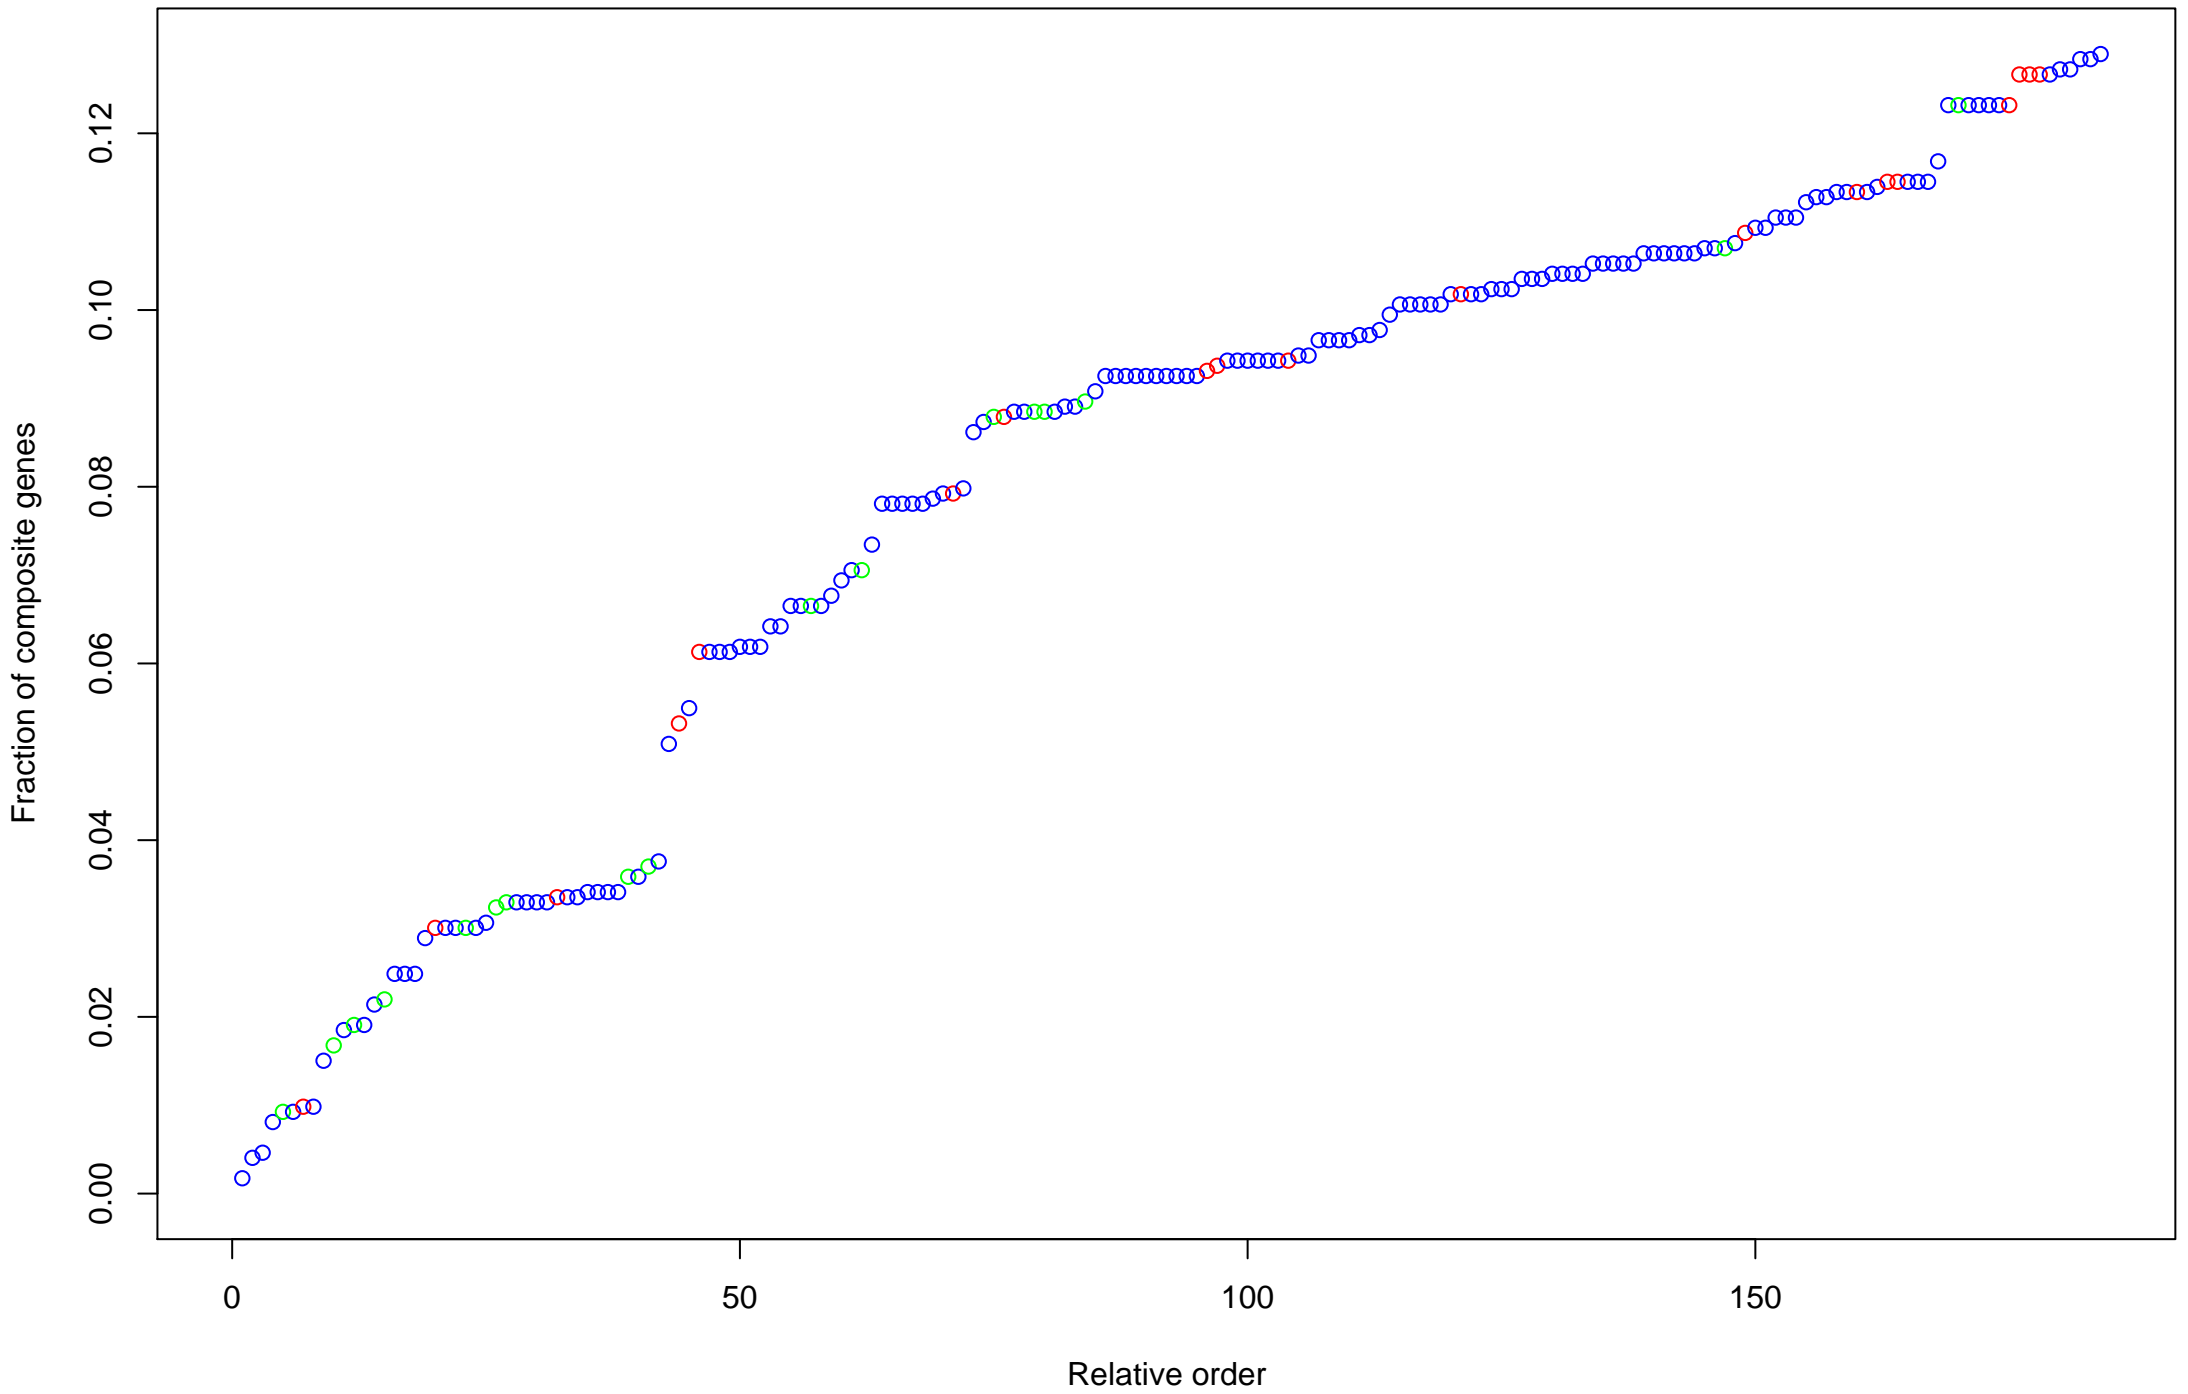

# SFLE-301-01 (*Shigella flexneri* (serotype 2a))

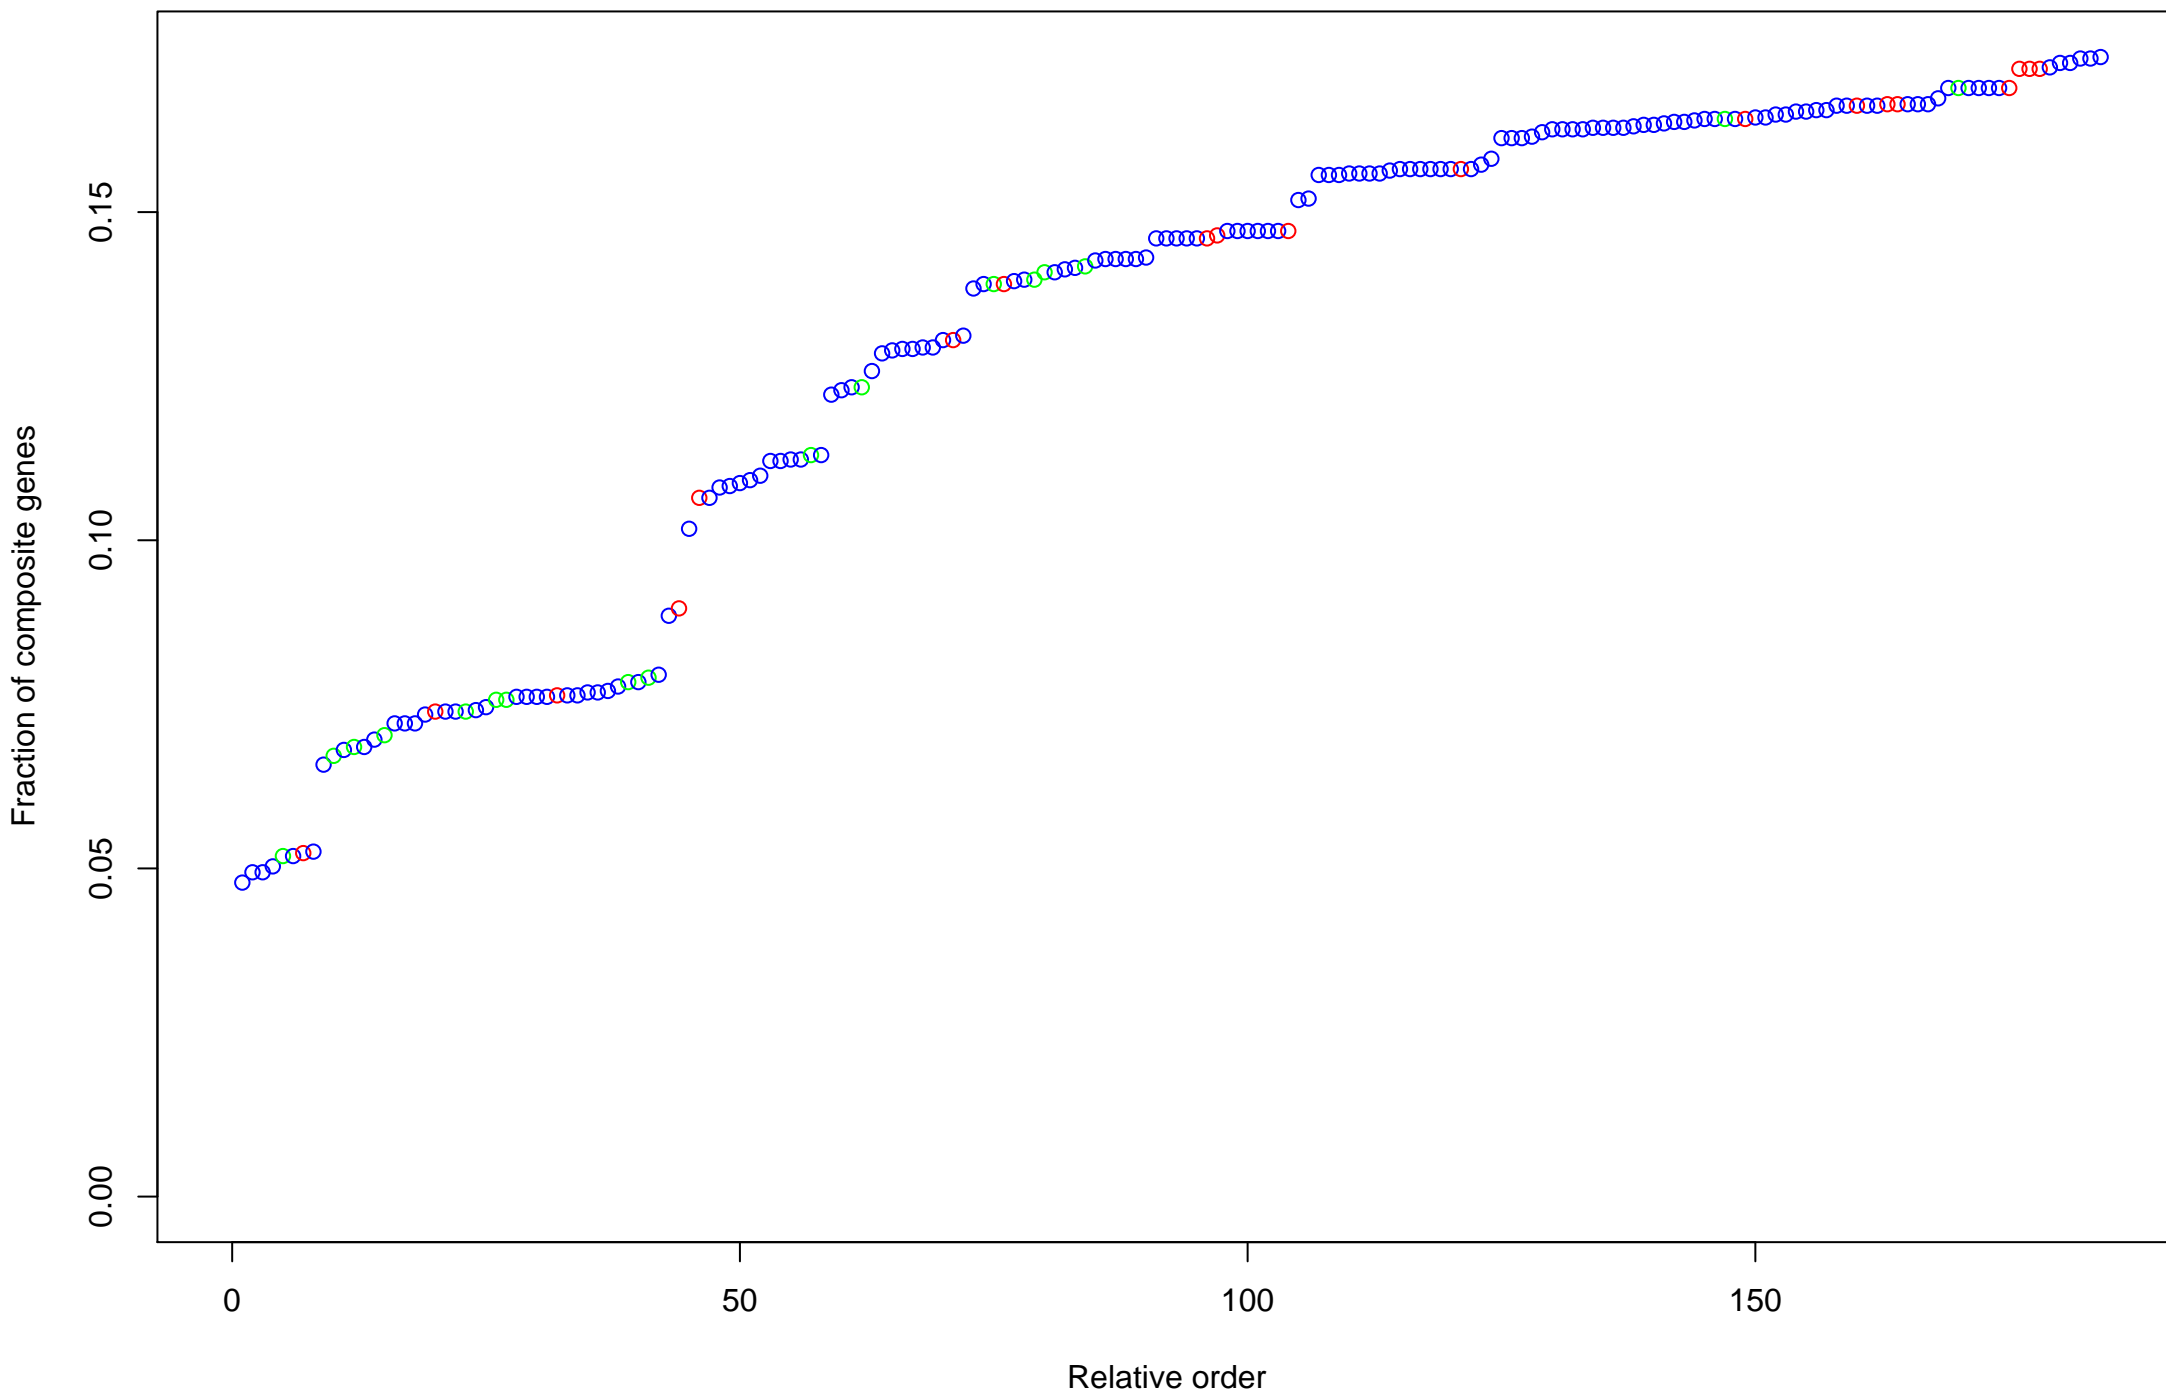

# SMUT-UA1-01 (Streptococcus mutans)

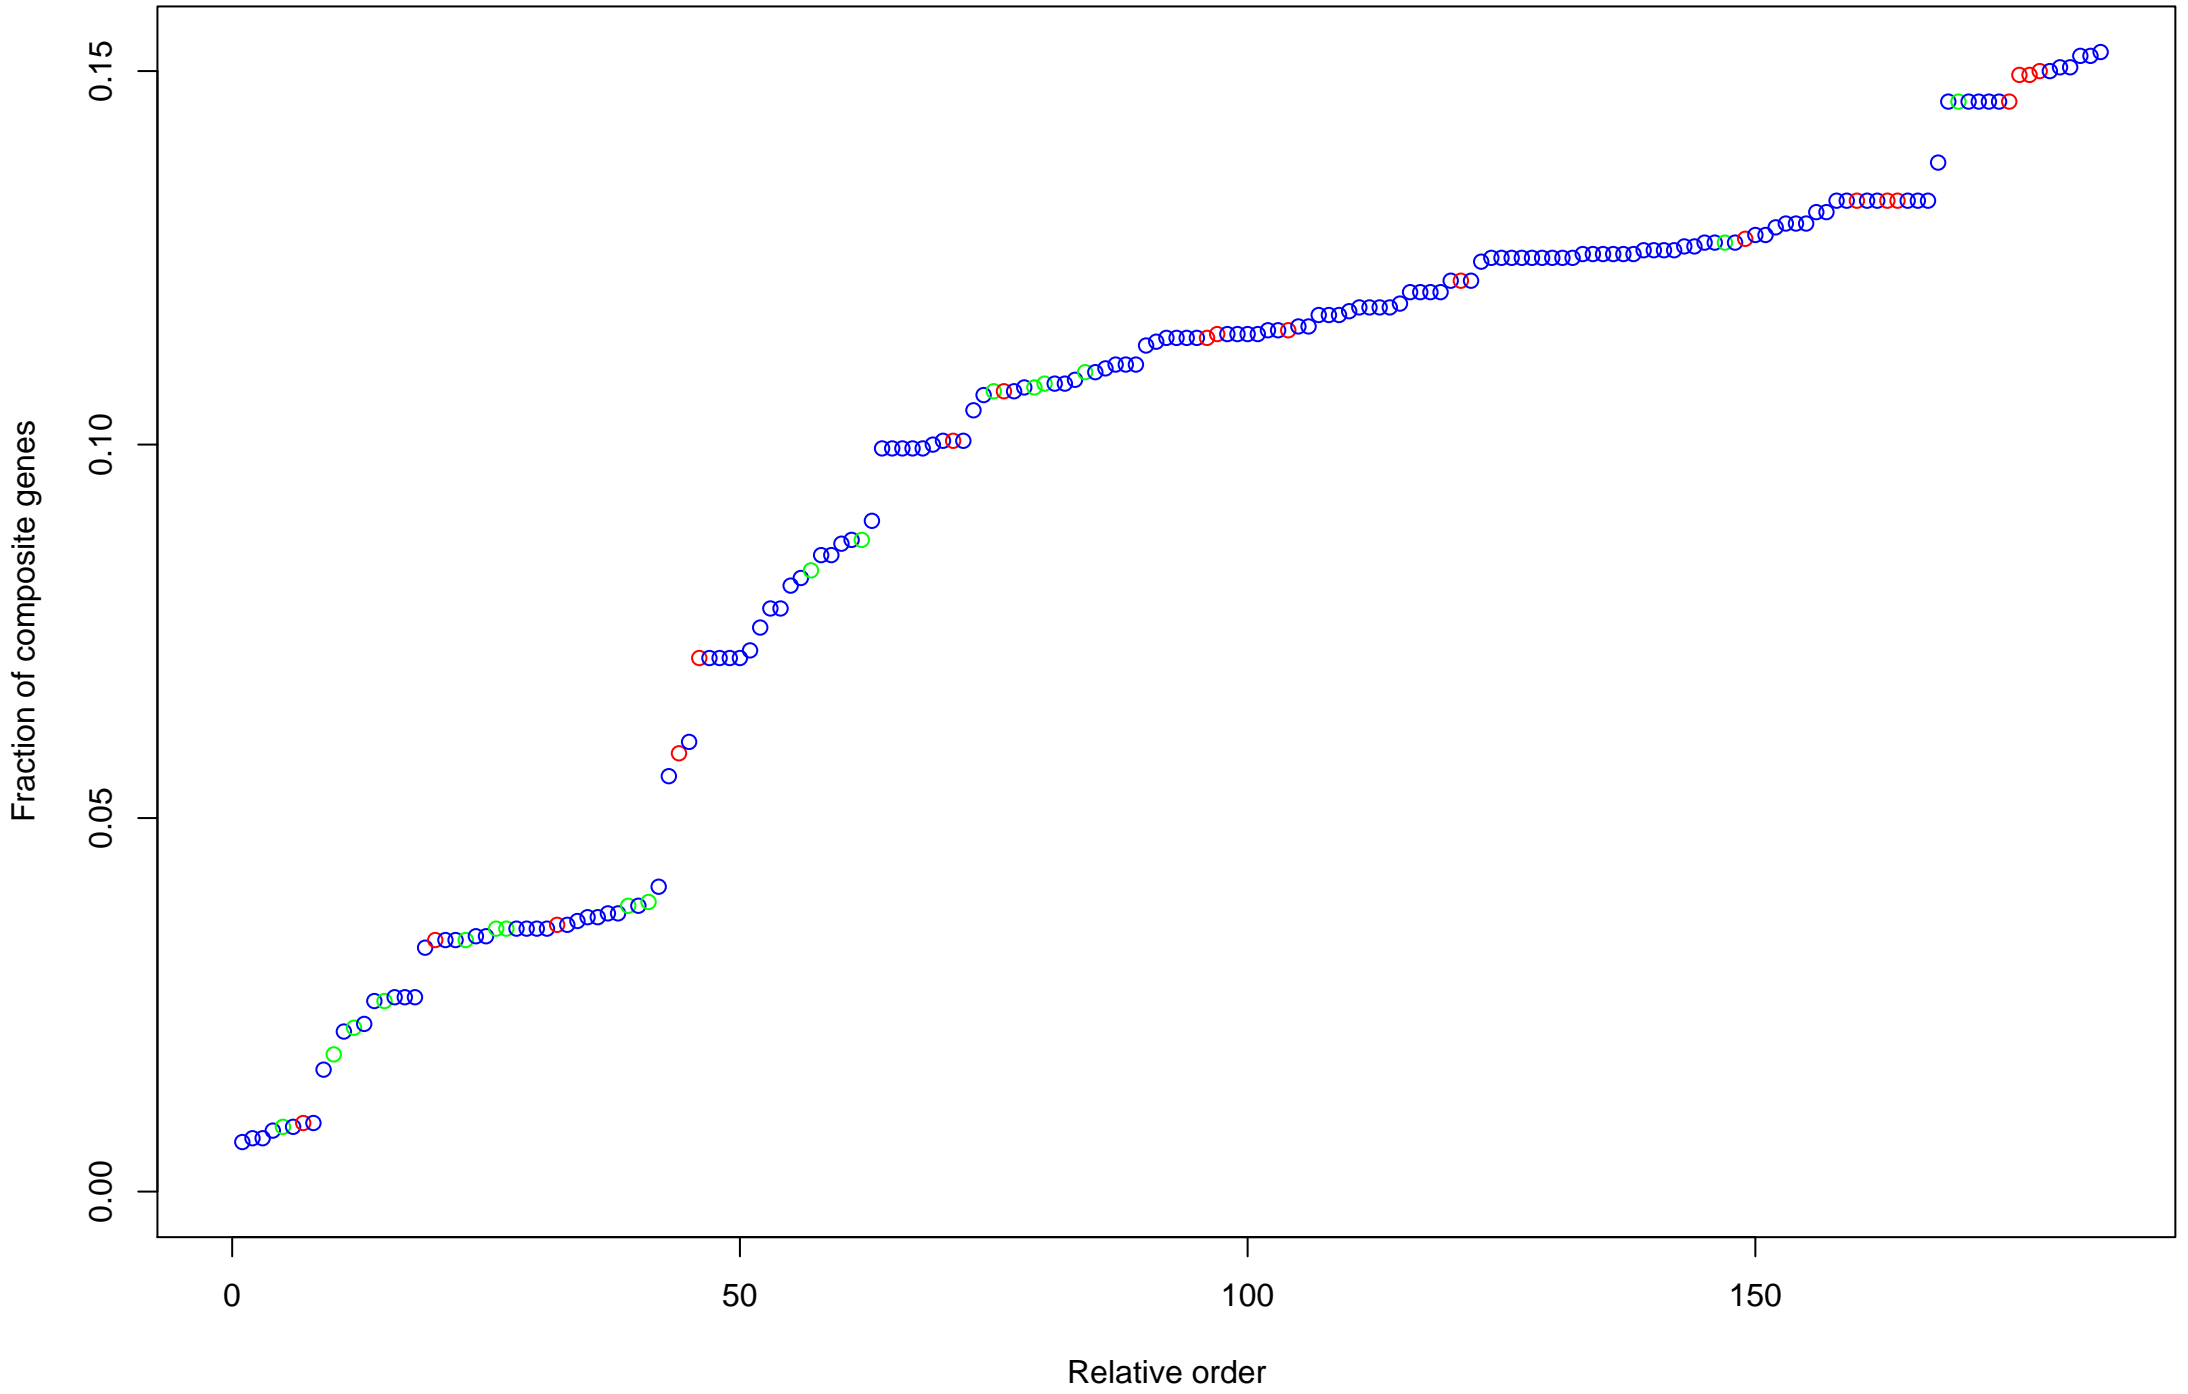

# WGLO-BRE-01 (*Wigglesworthia glossinidia* (*brevipalpis*))

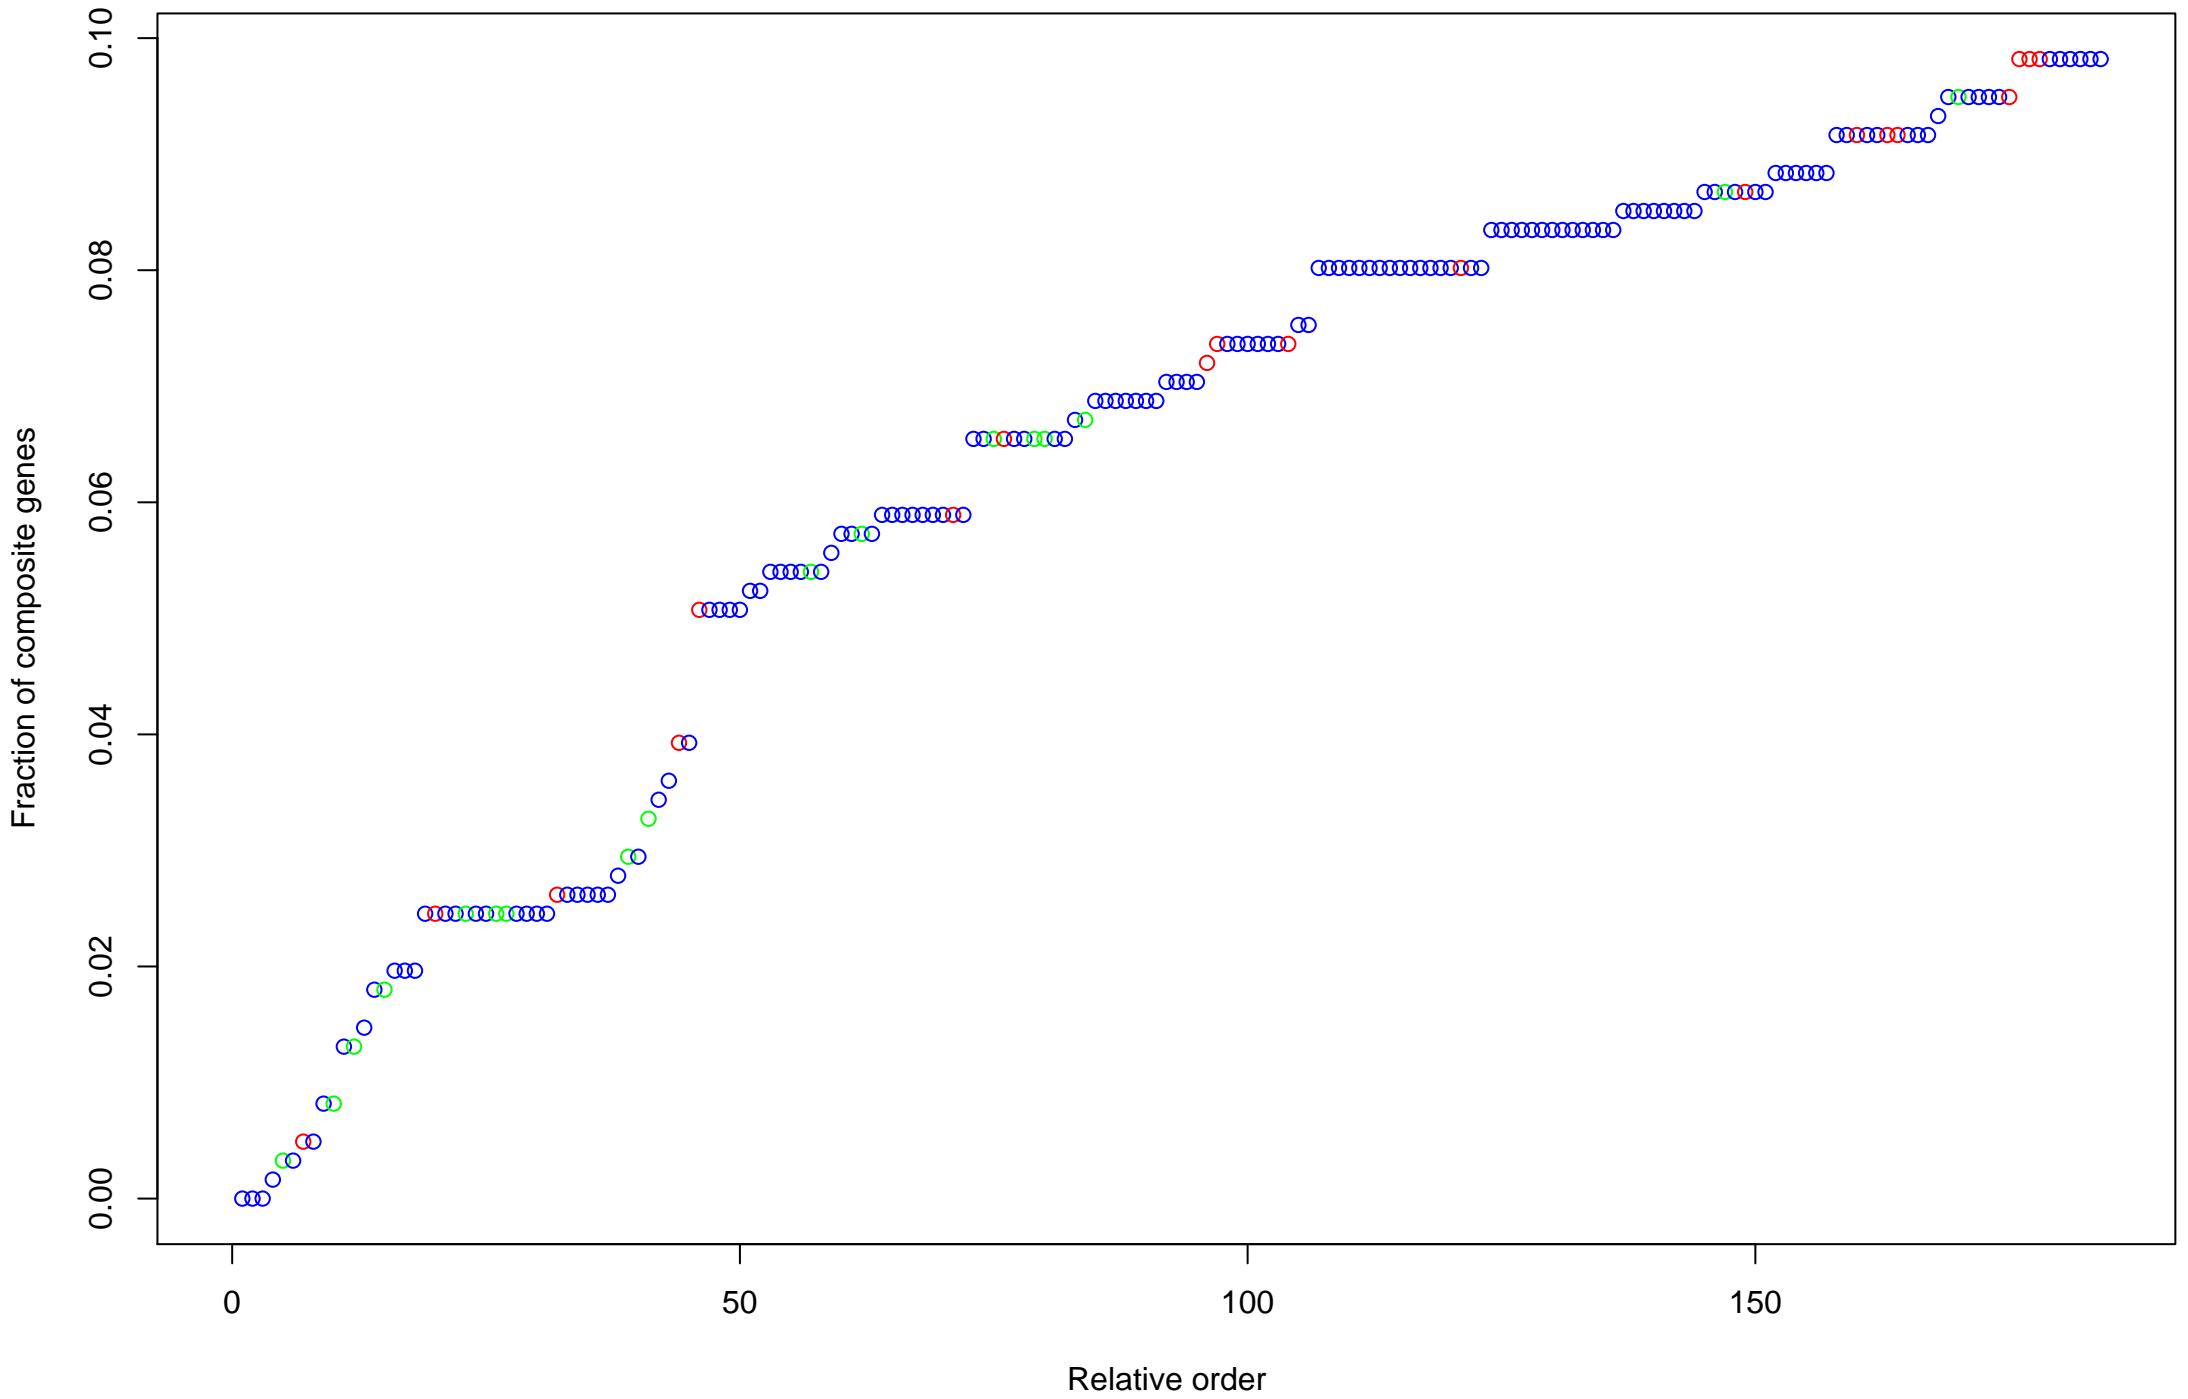

# SAGA-NEM-01 (*Streptococcus agalactiae*)

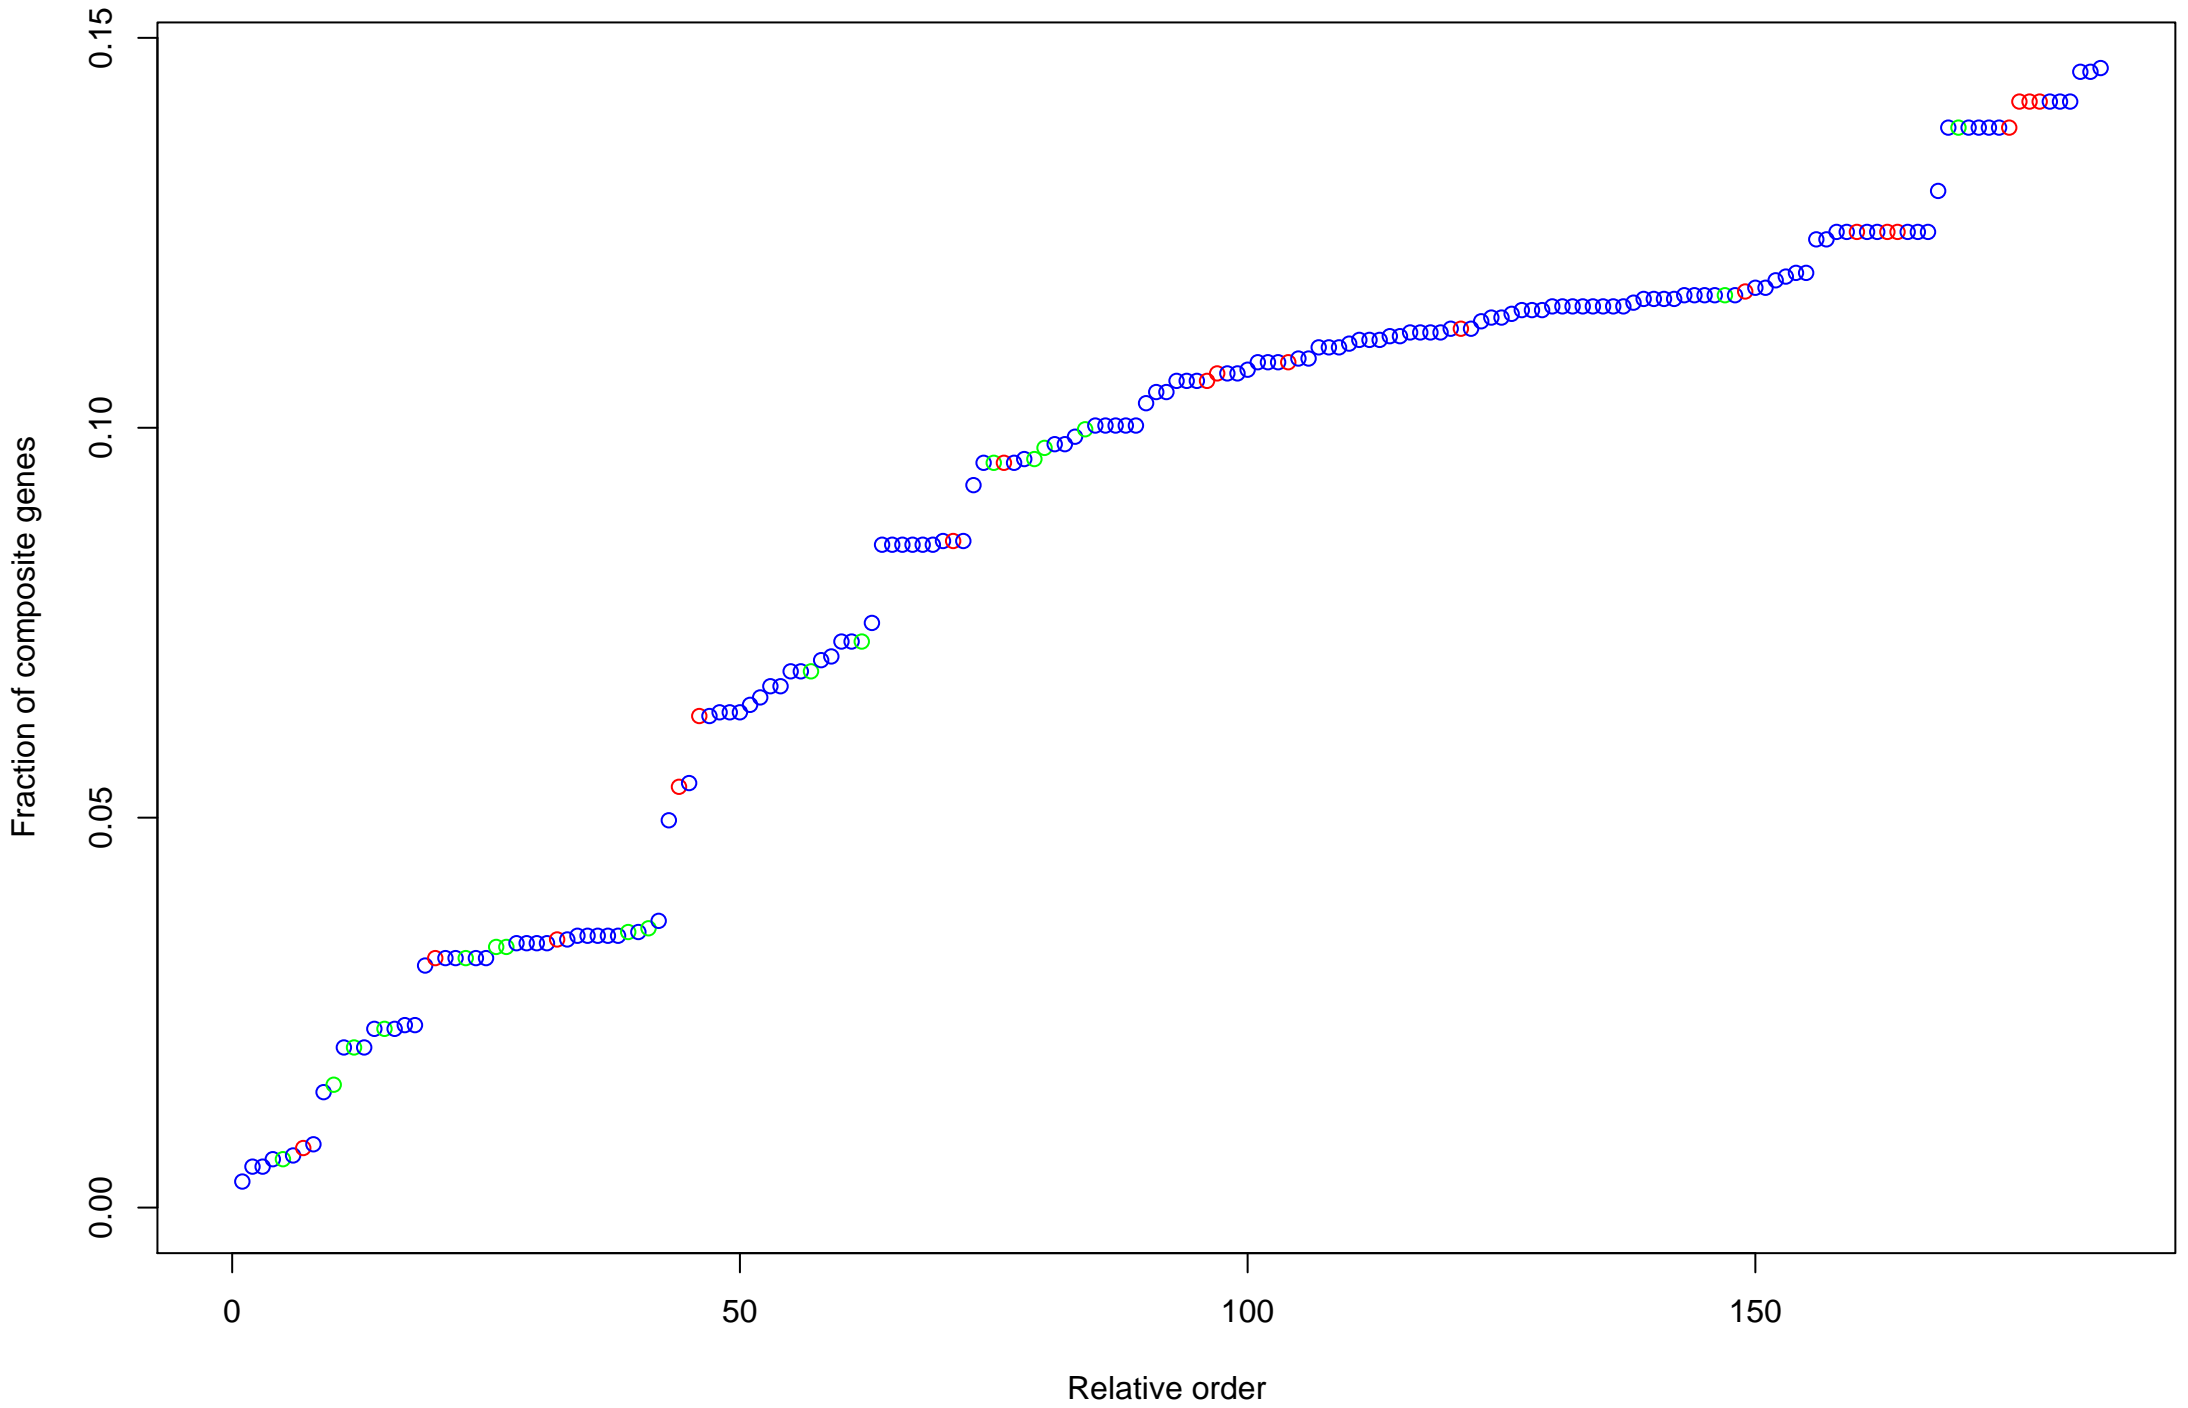

# MPEN-HF2-01 (*Mycoplasma penetrans*)

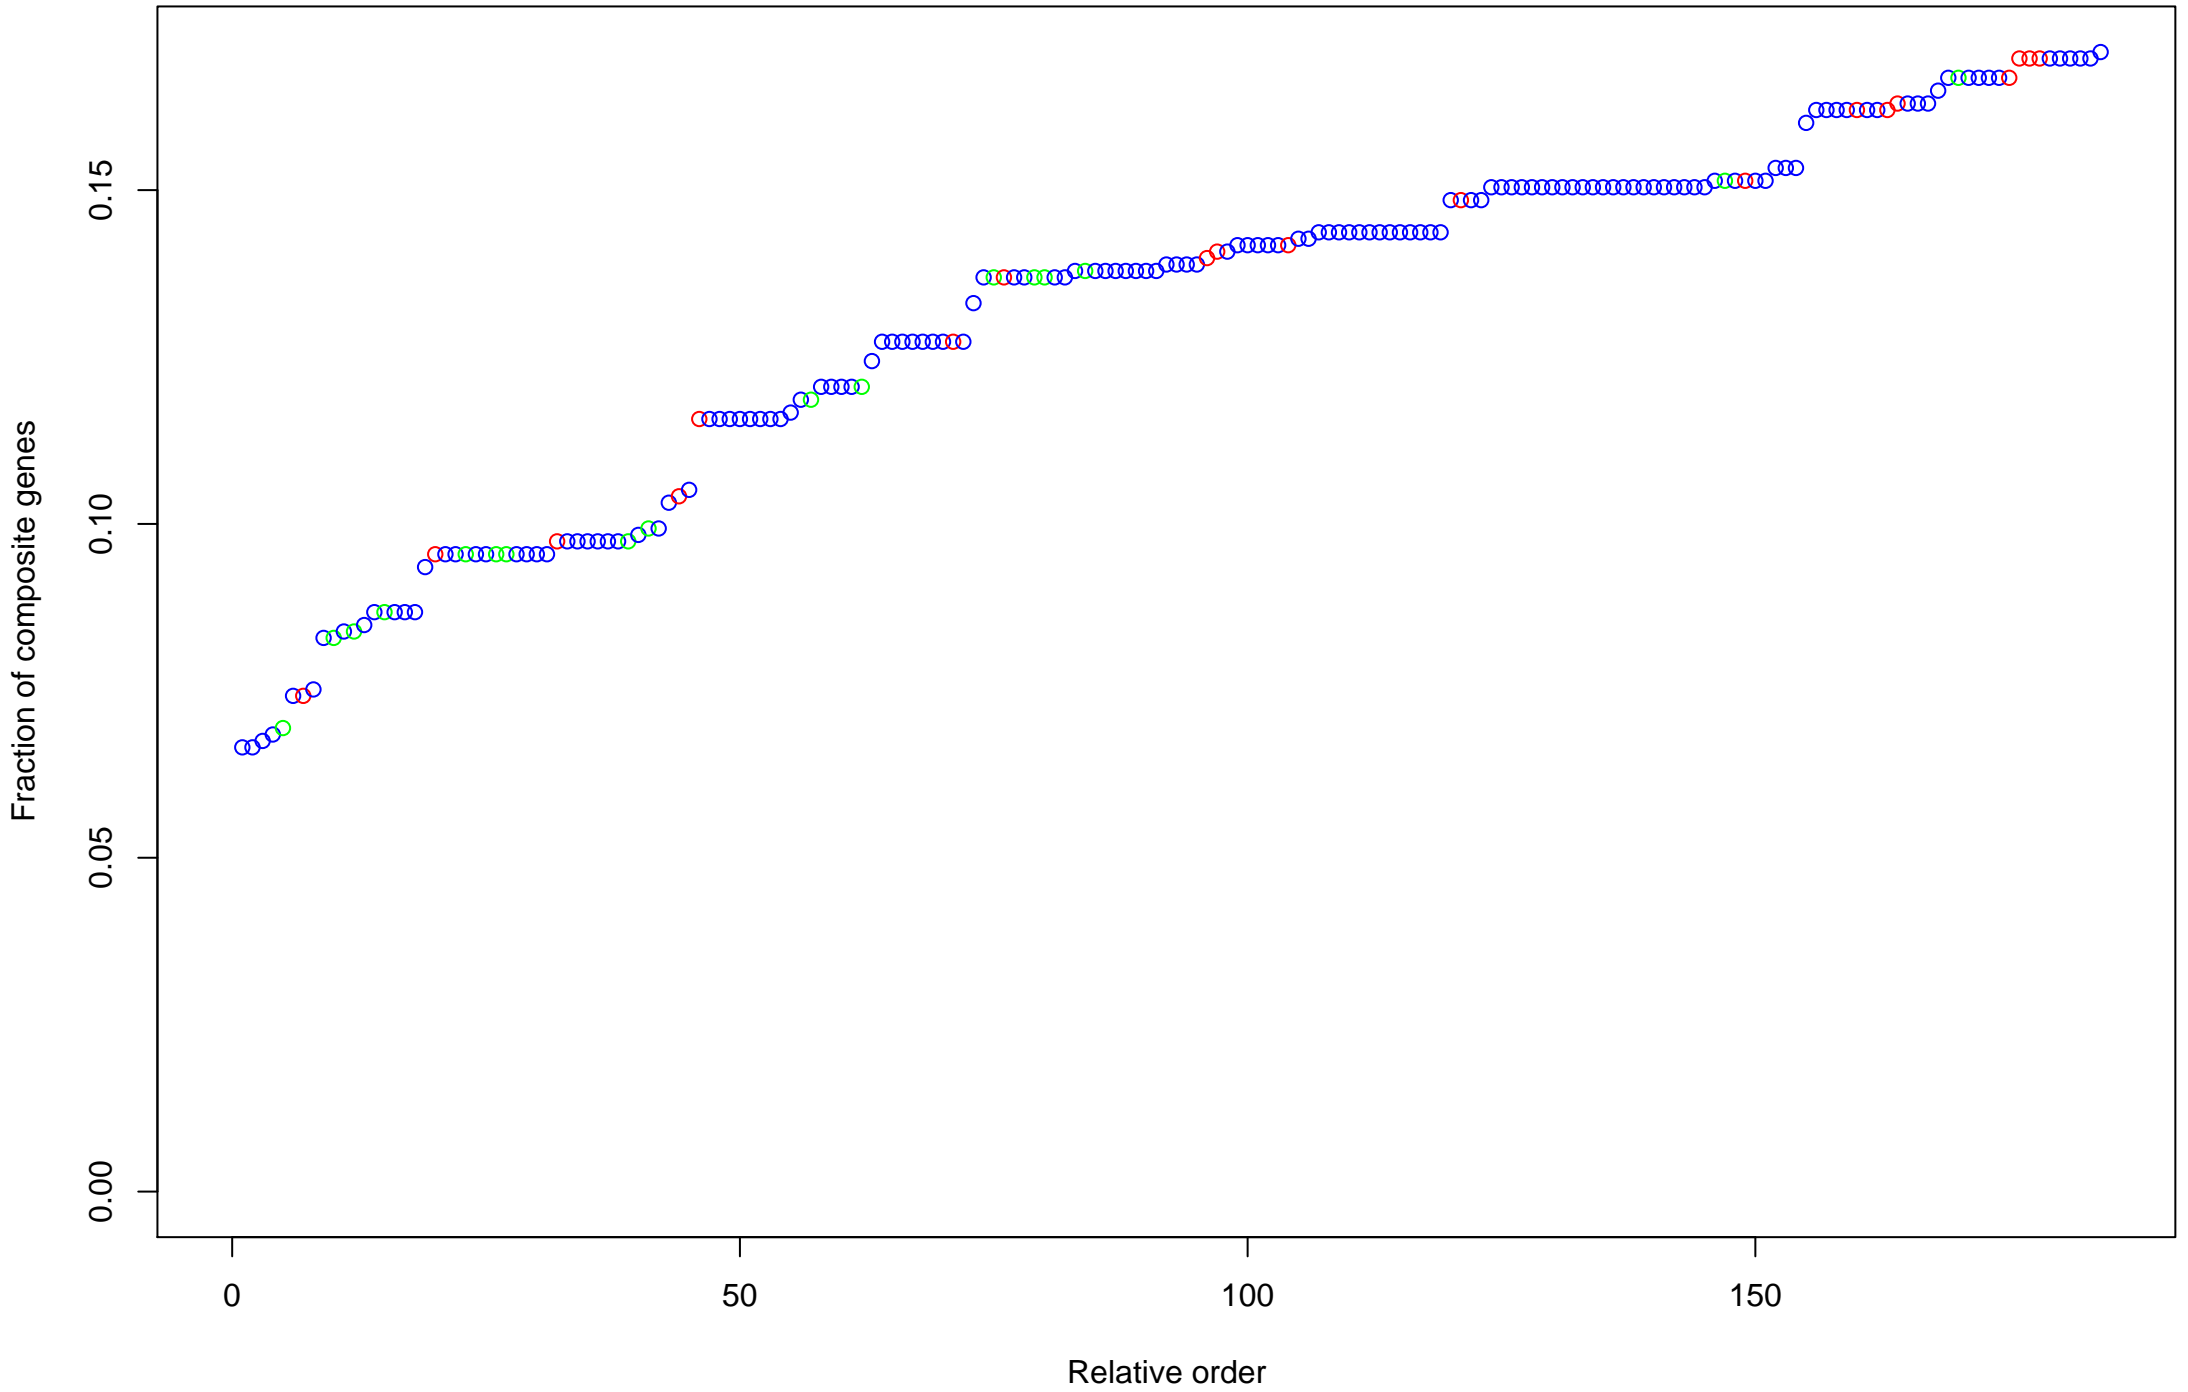

# MMUS-XXX-02 (*Mus musculus*)

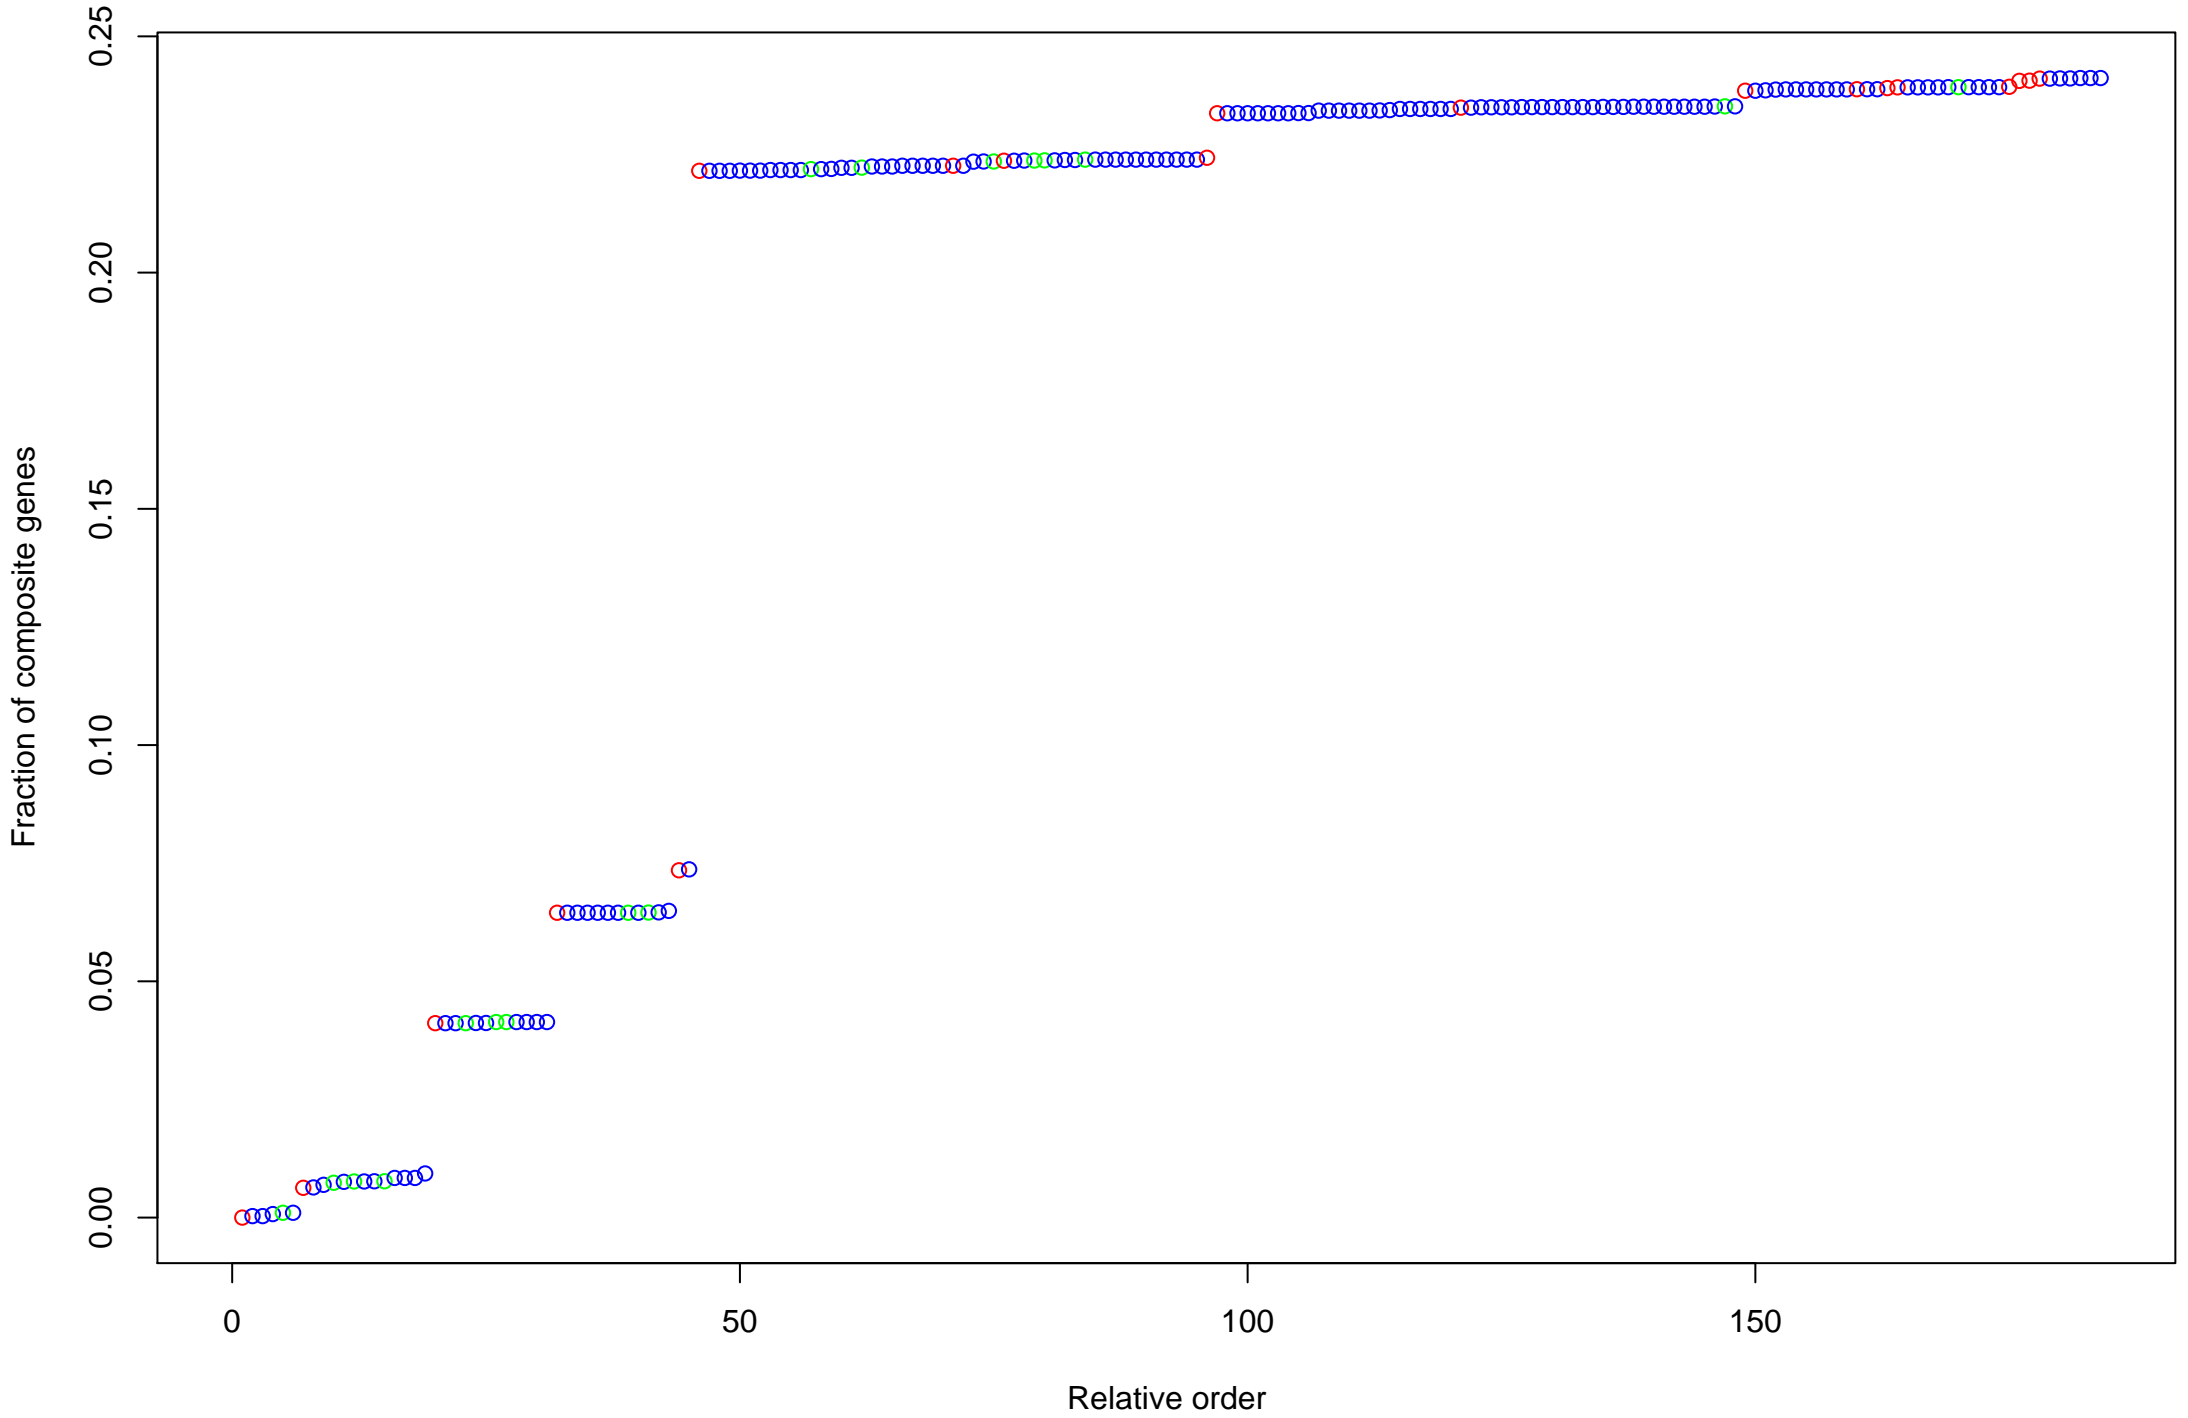



# ECOL-CFT-01 (Escherichia coli)

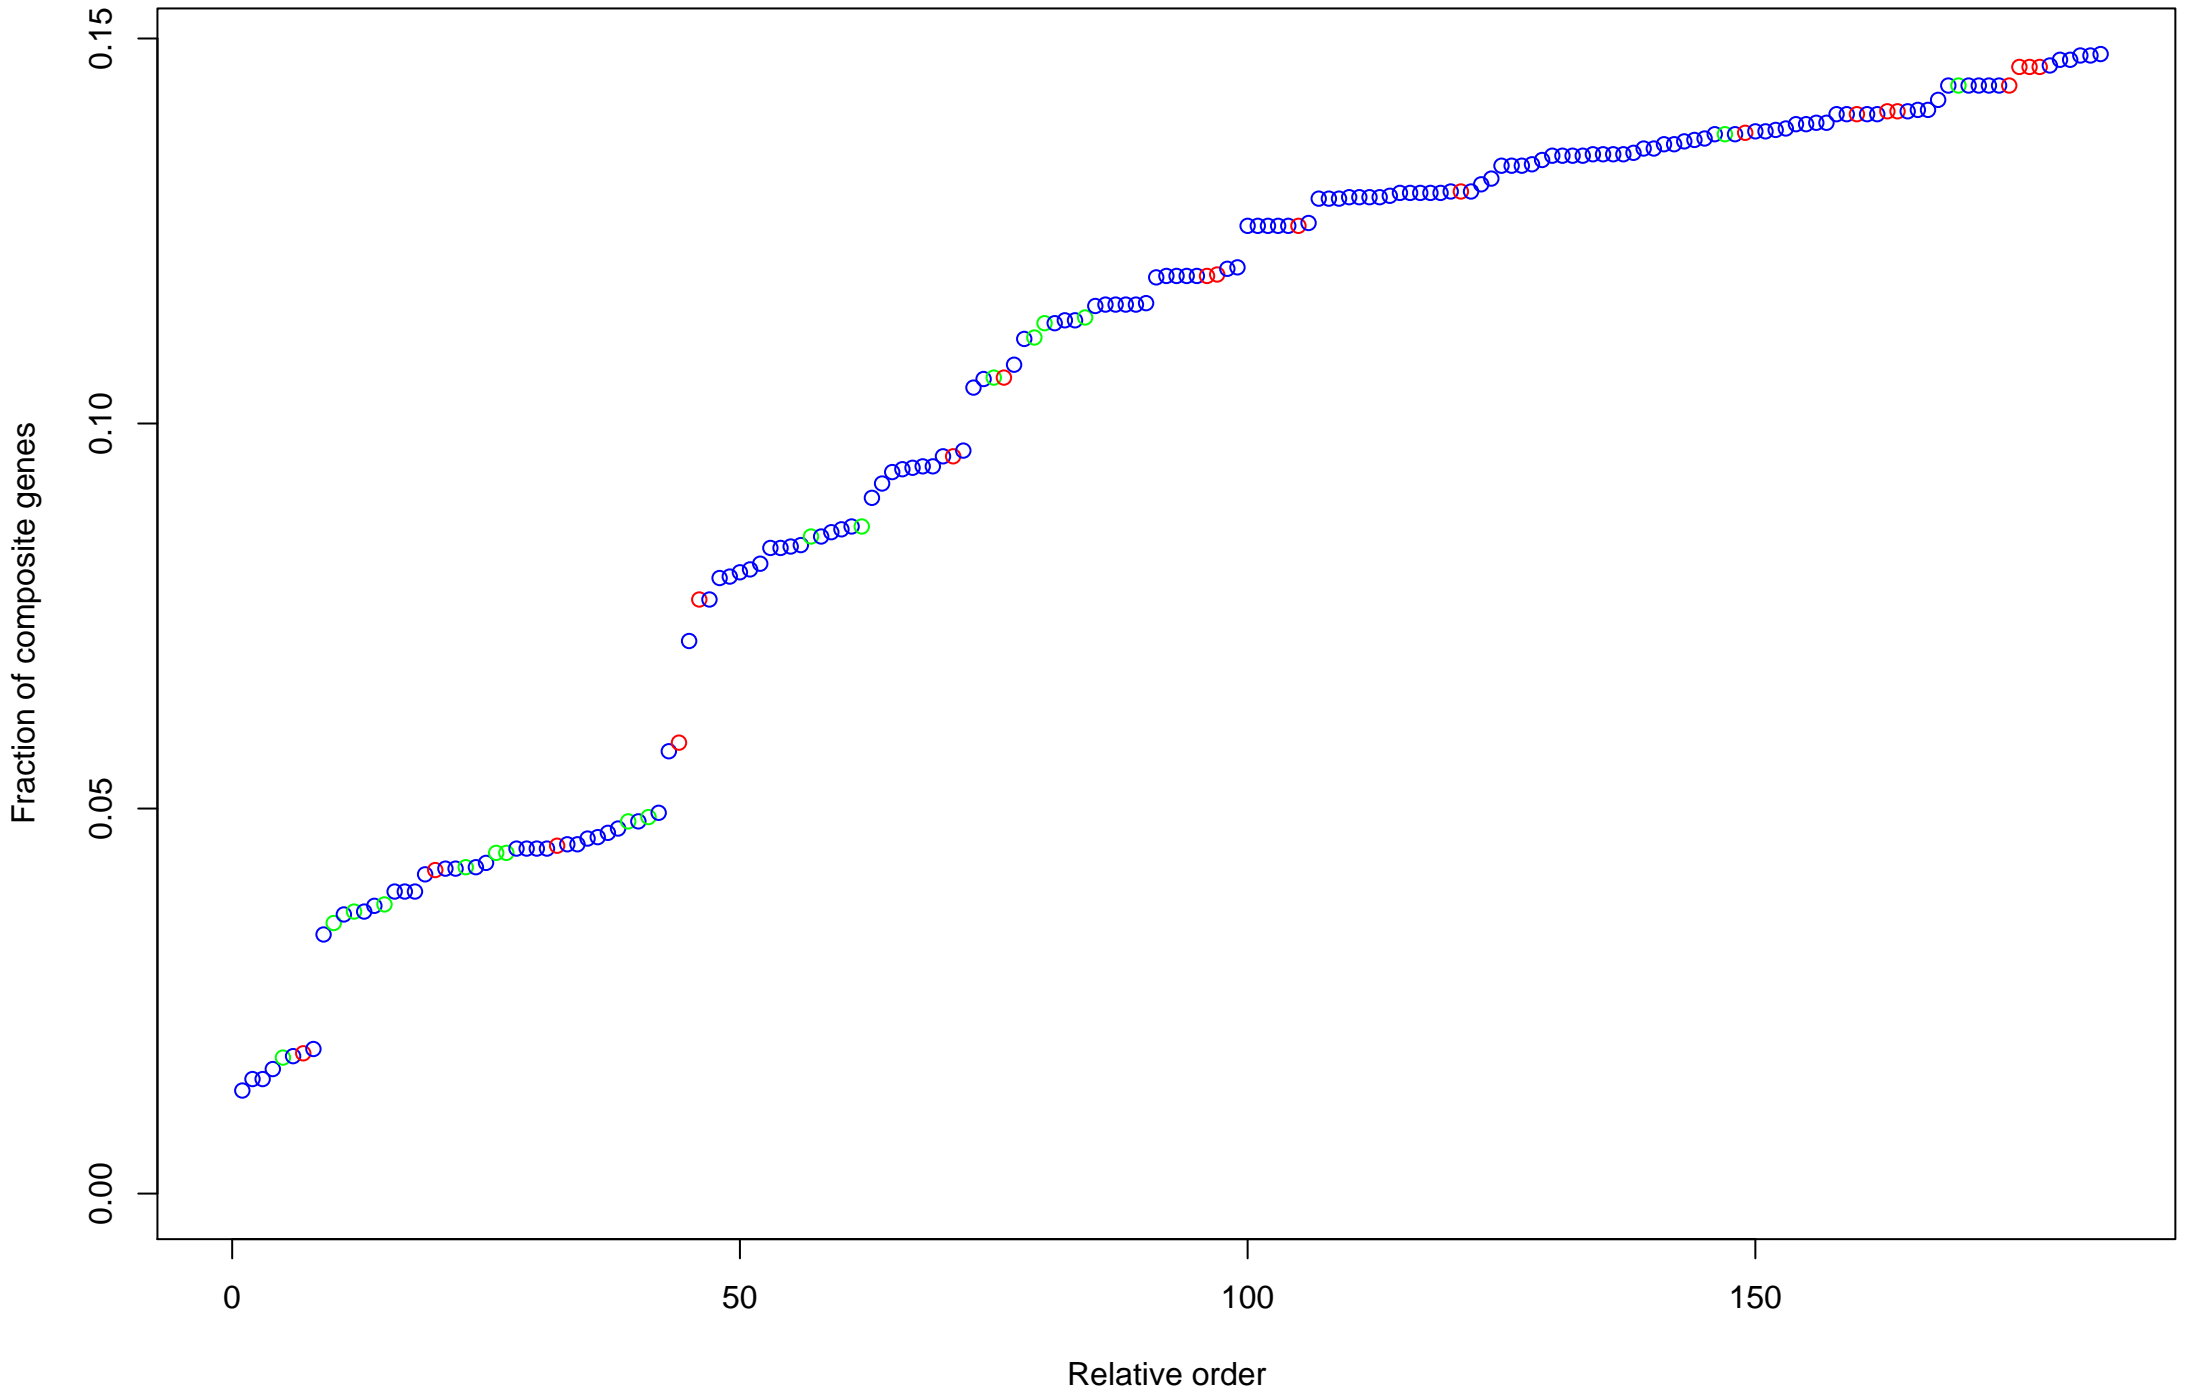

# PPUT-KT2-01 (*Pseudomonas putida*)

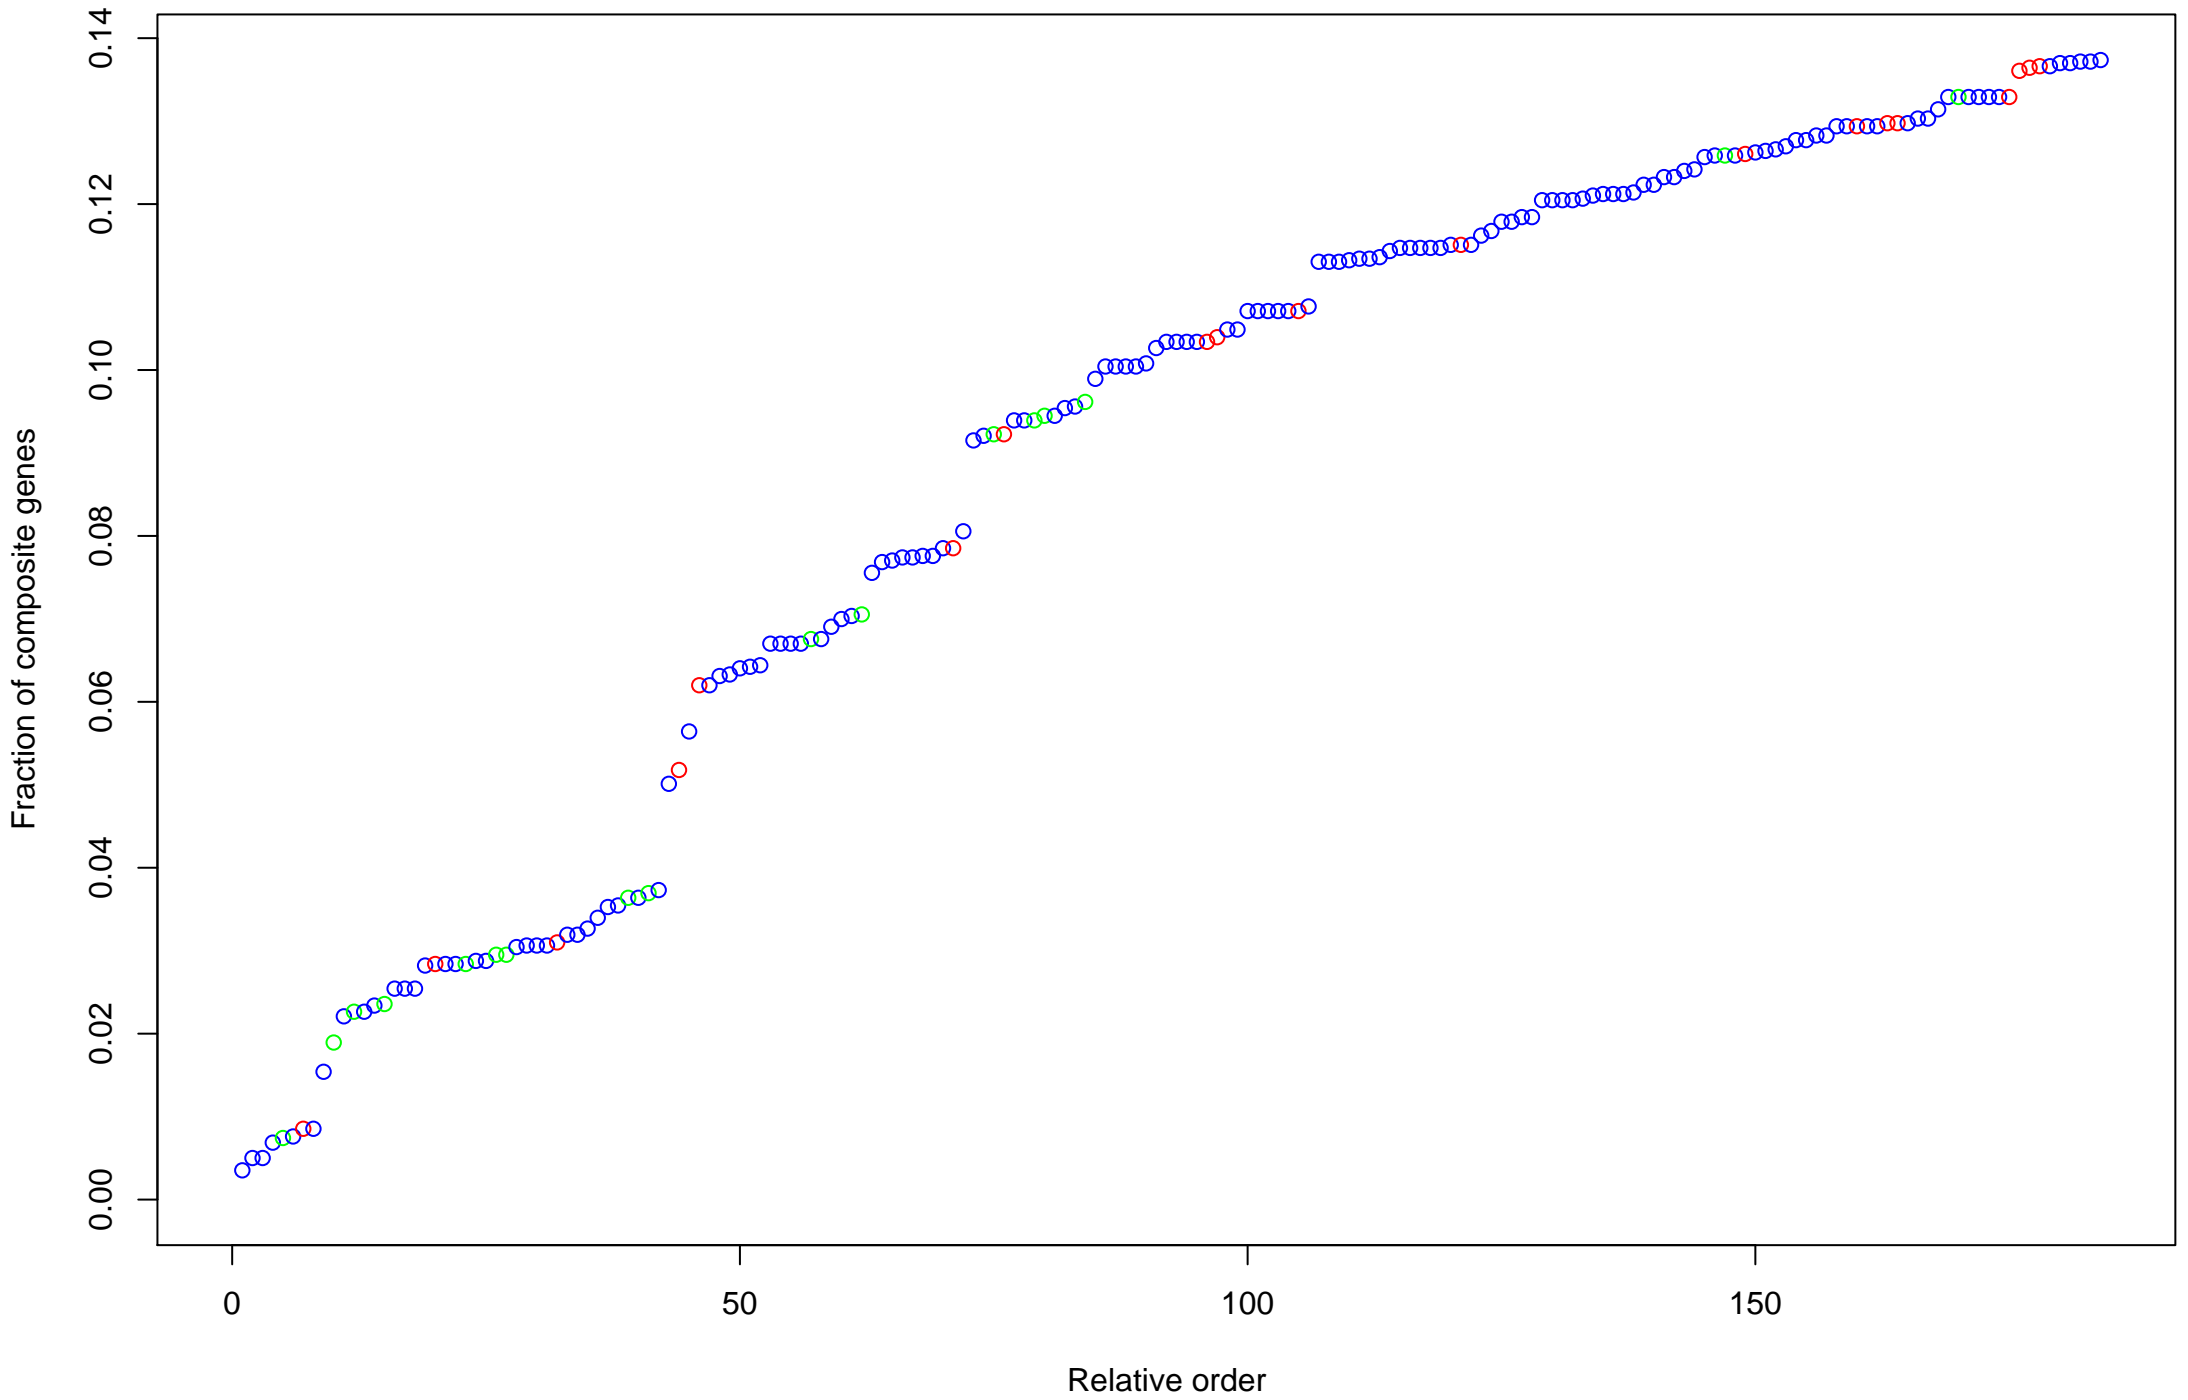

# BJAP-USD-01 (*Bradyrhizobium japonicum*)

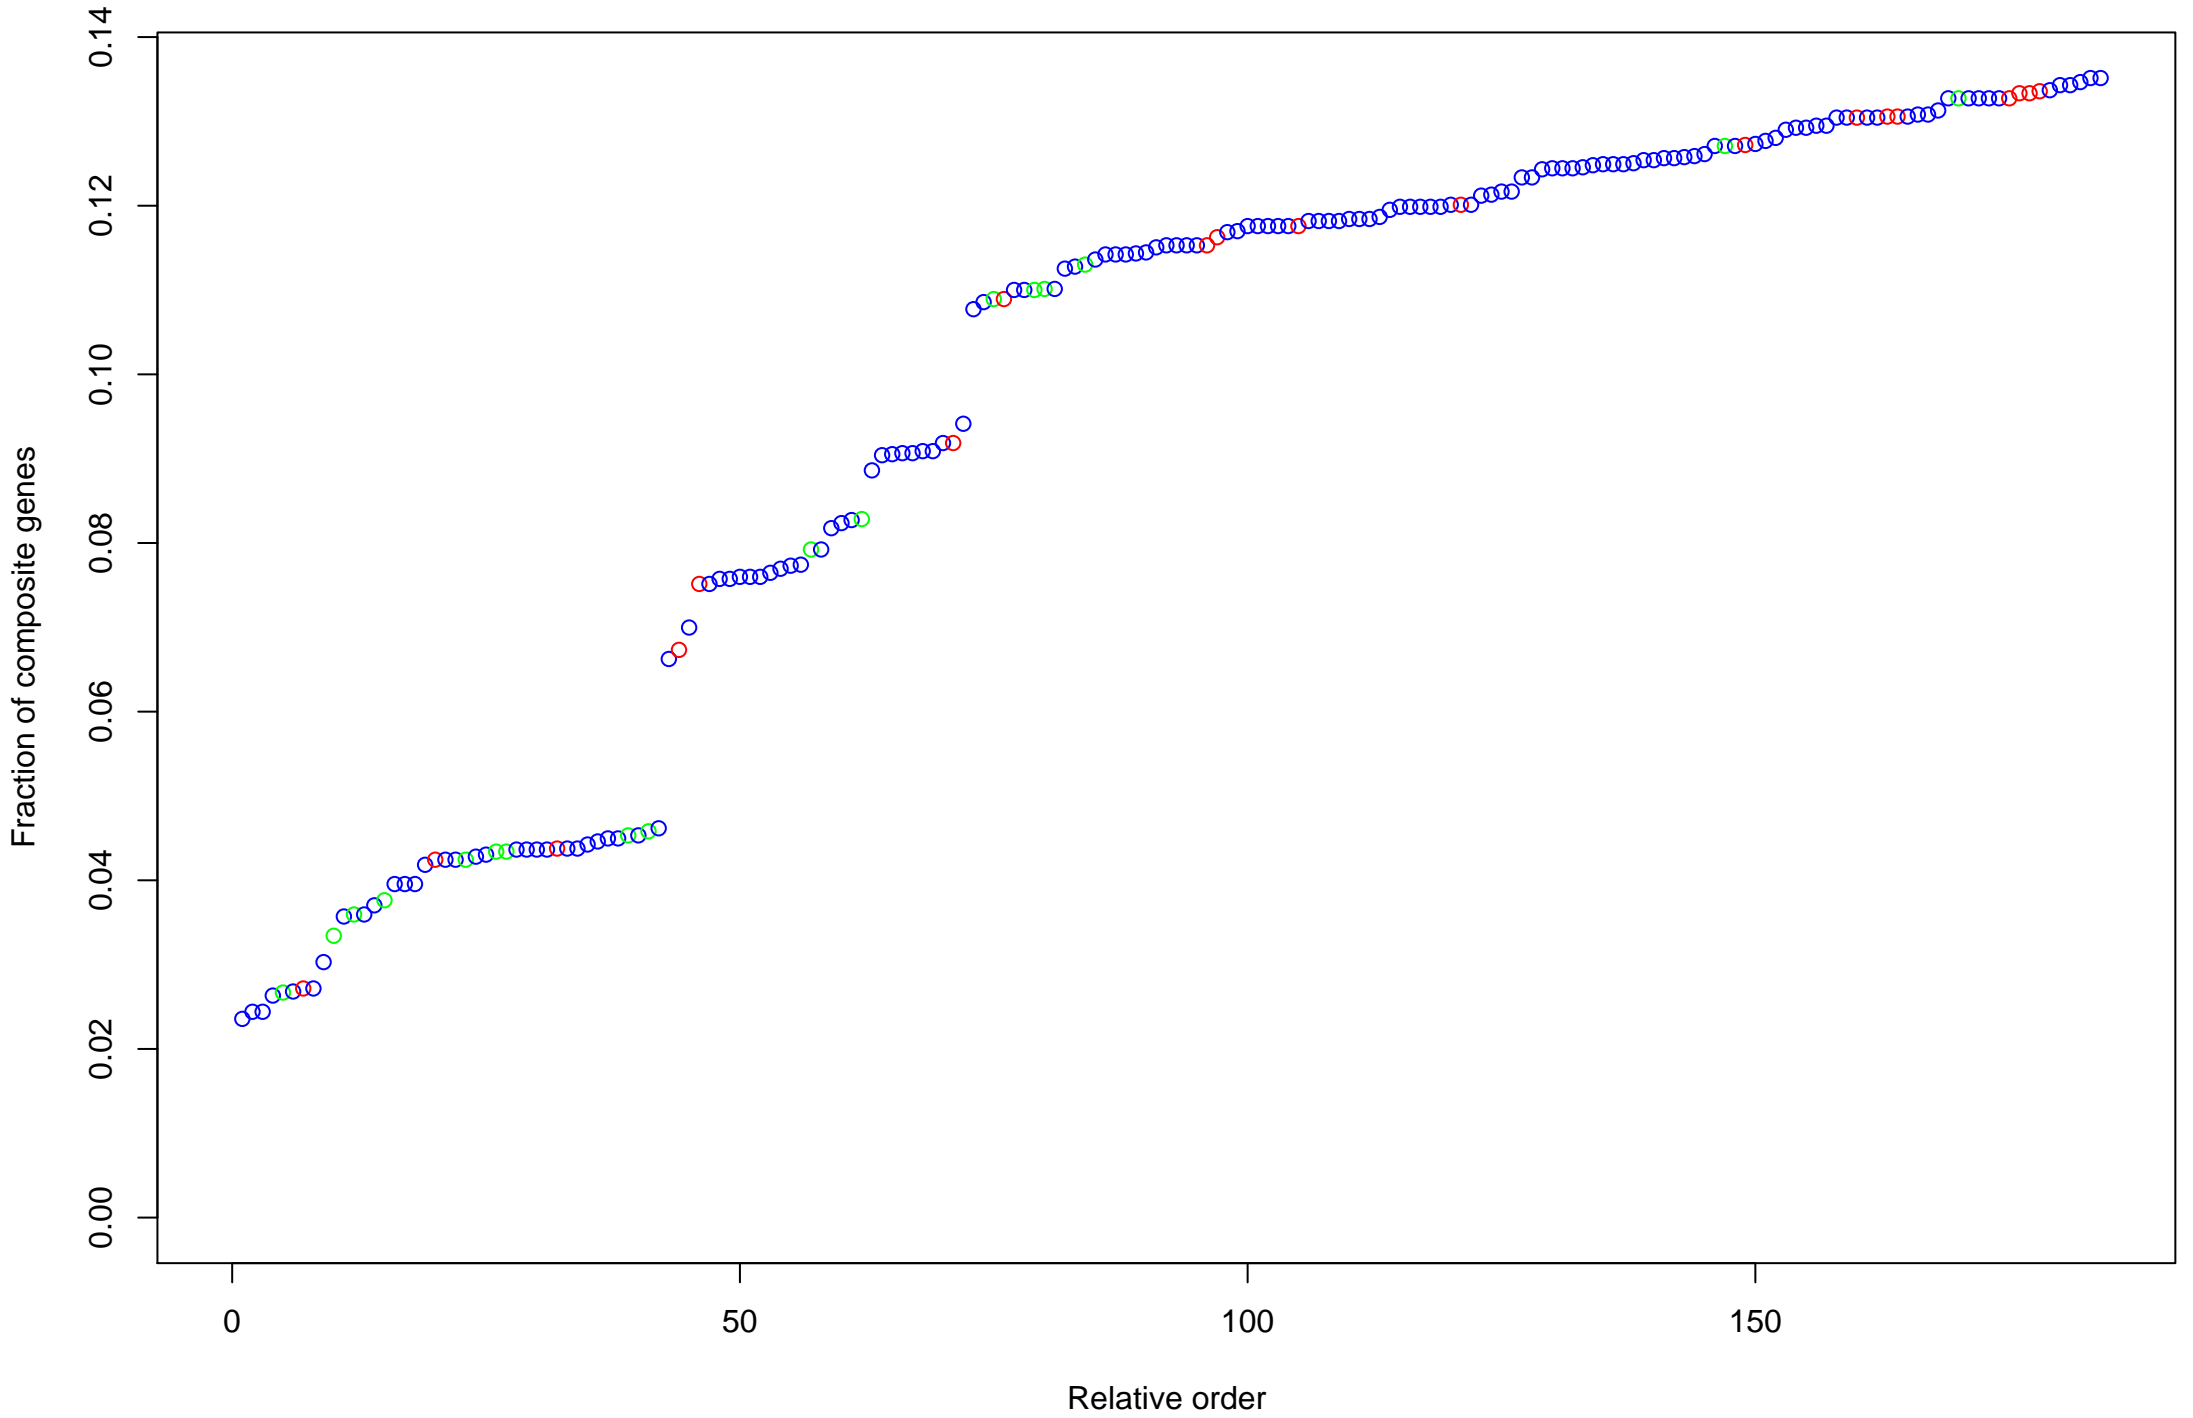

# BAPH-XBP-01 (*Buchnera aphidicola*)

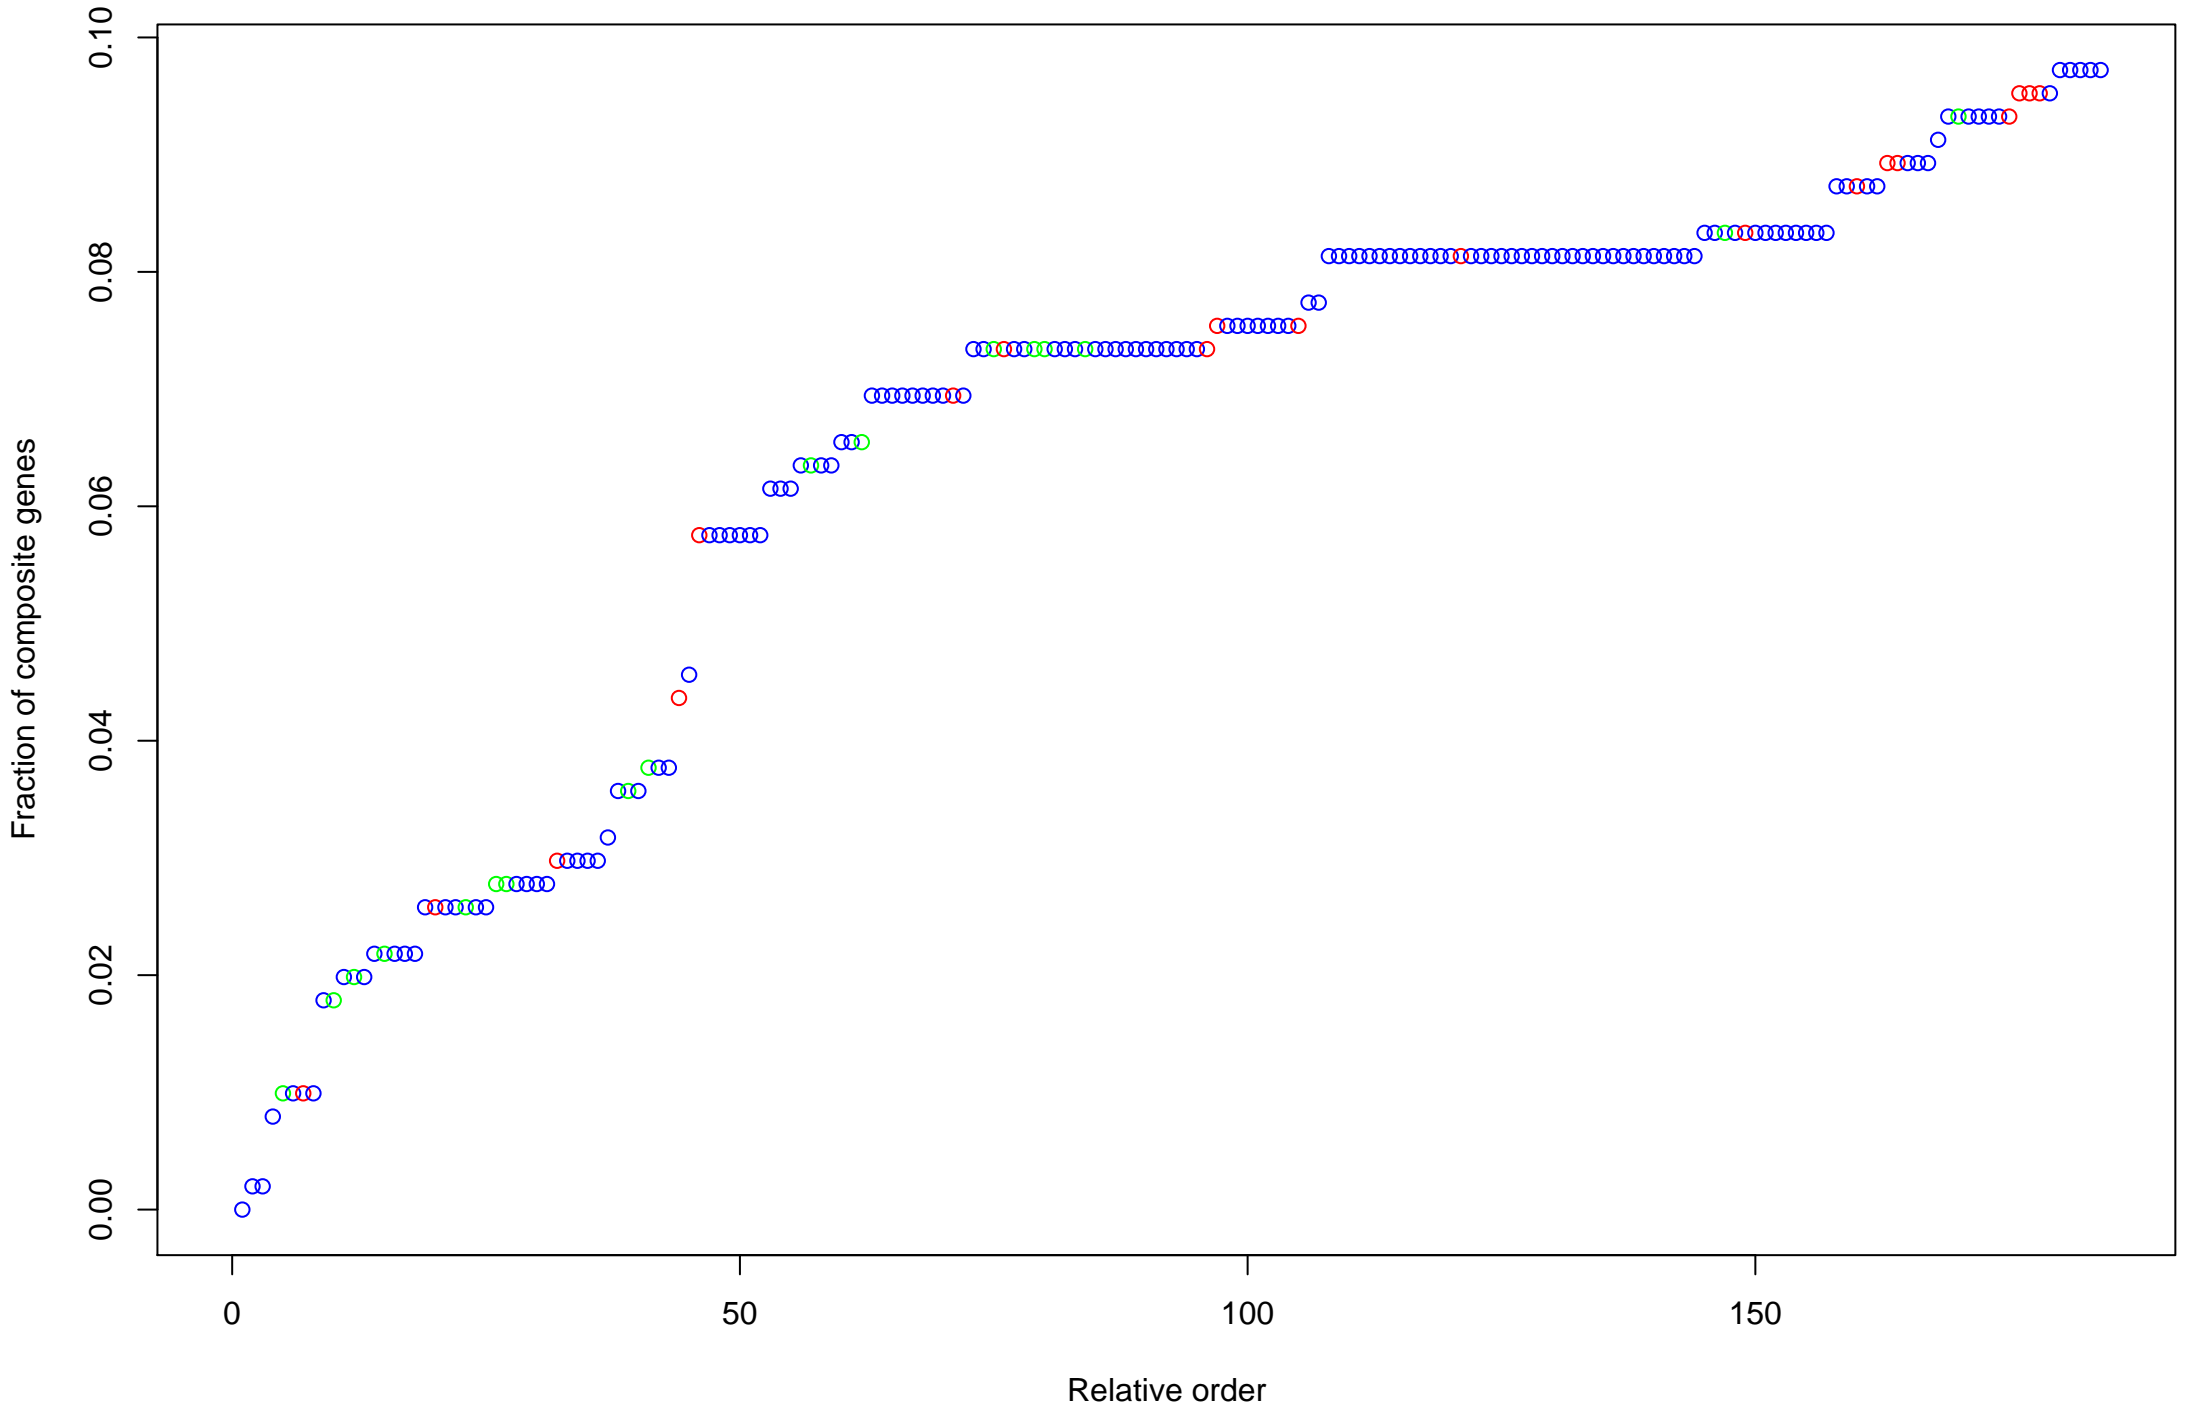

# XFAS-XPB-01 (*Xylella fastidiosa*)

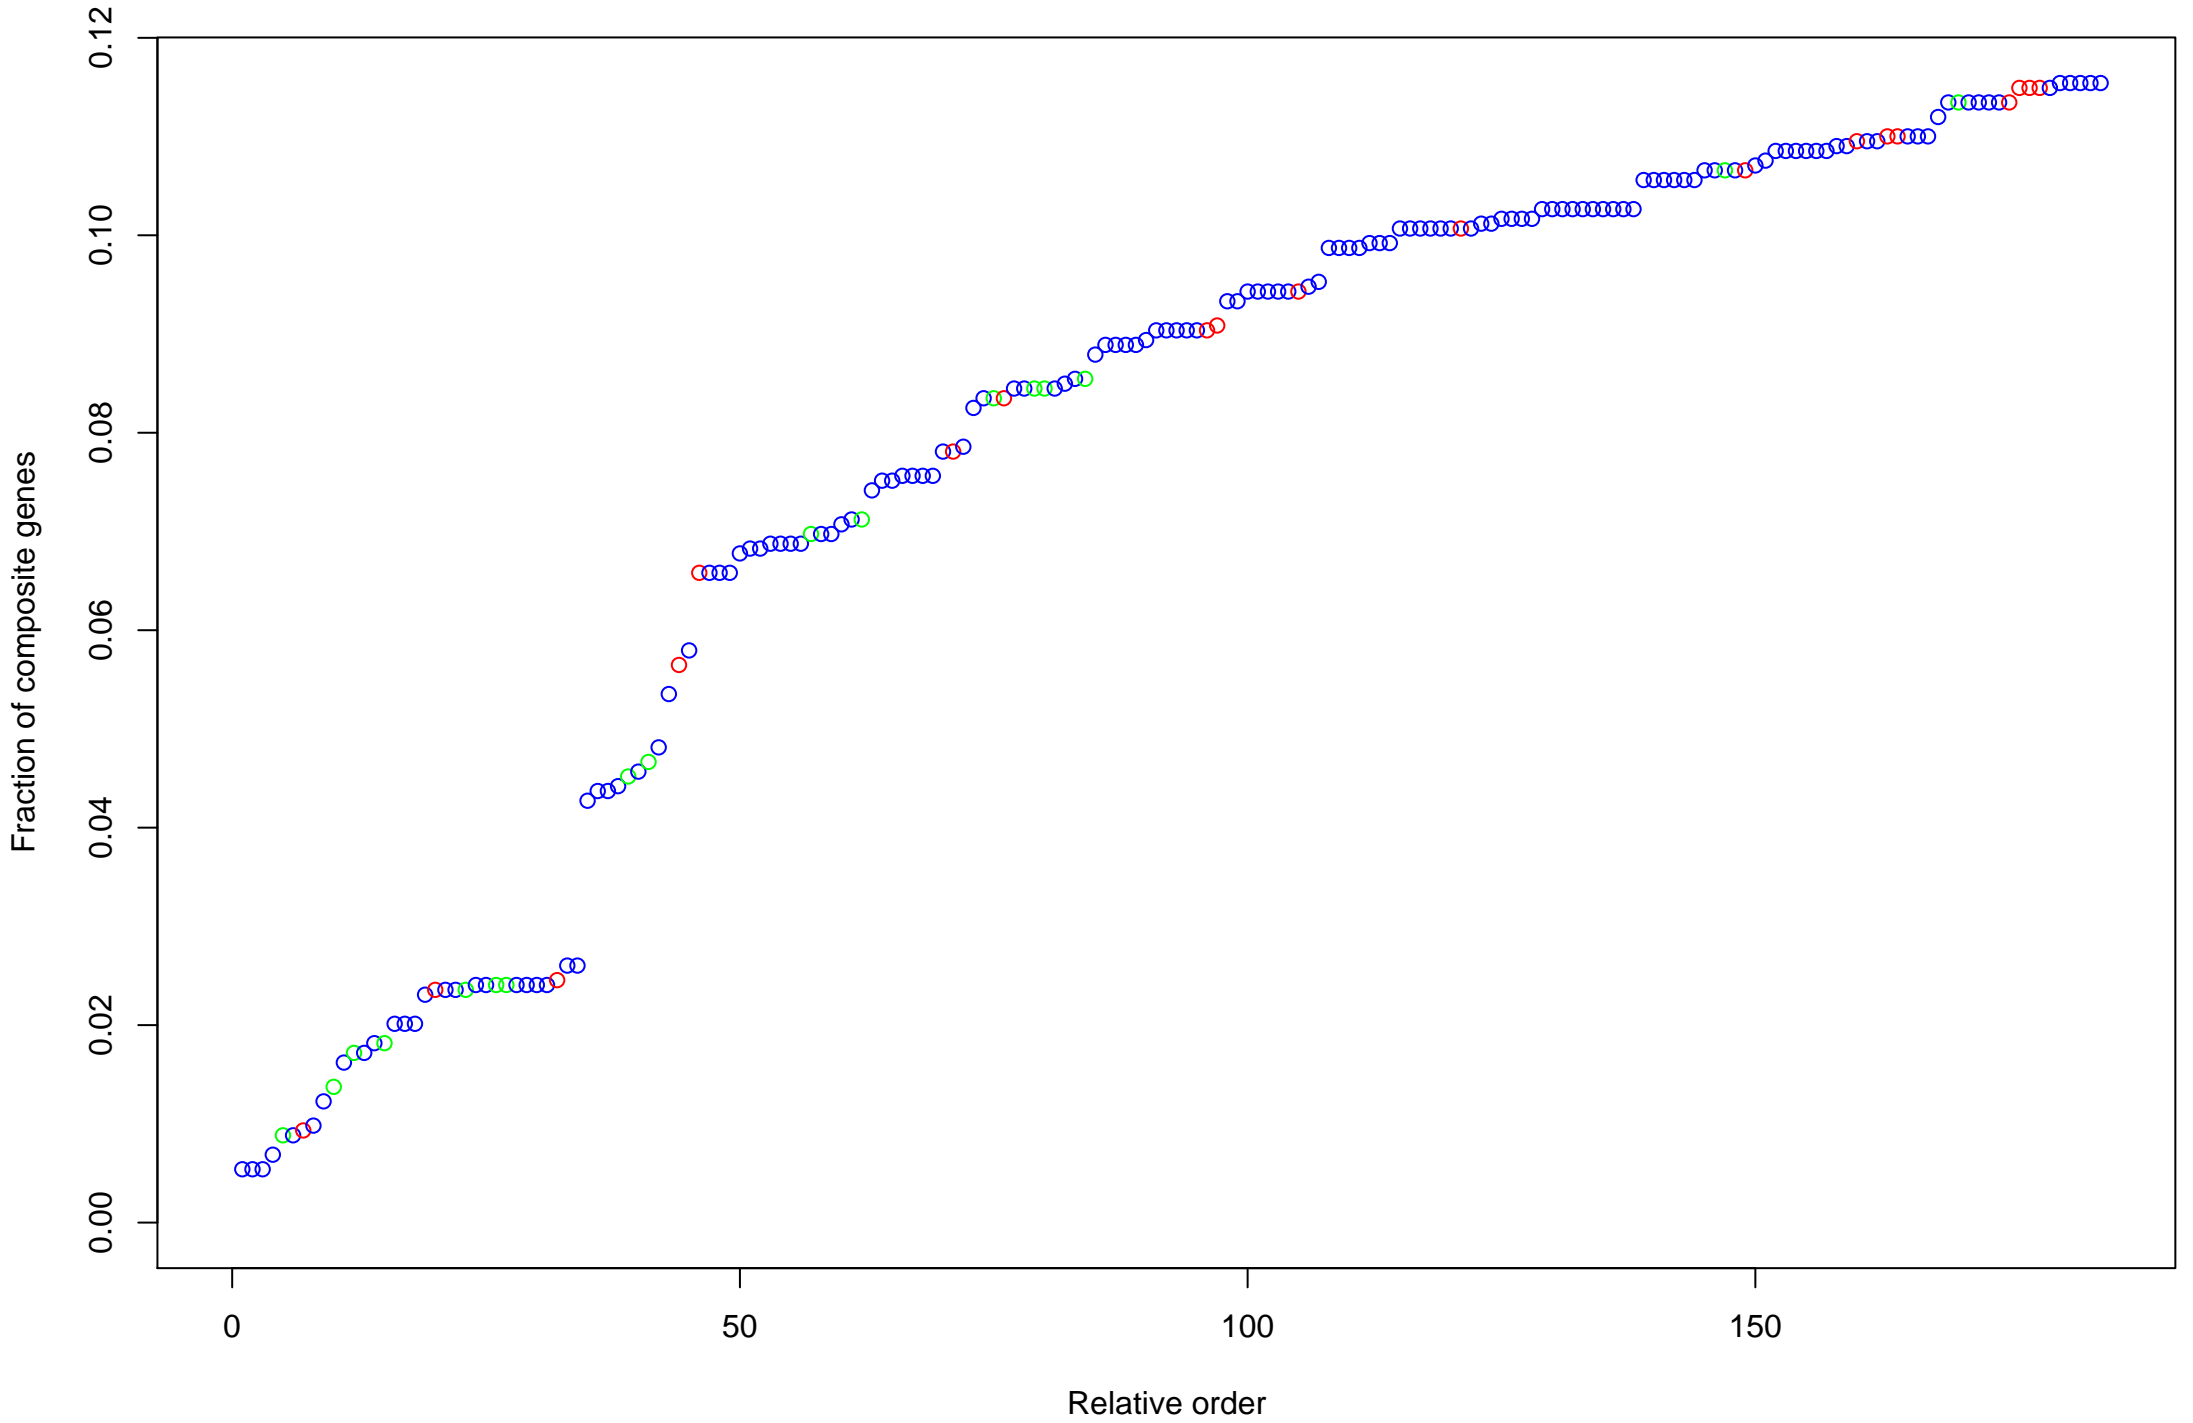

# CTET-E88-01 (*Clostridium tetani*)

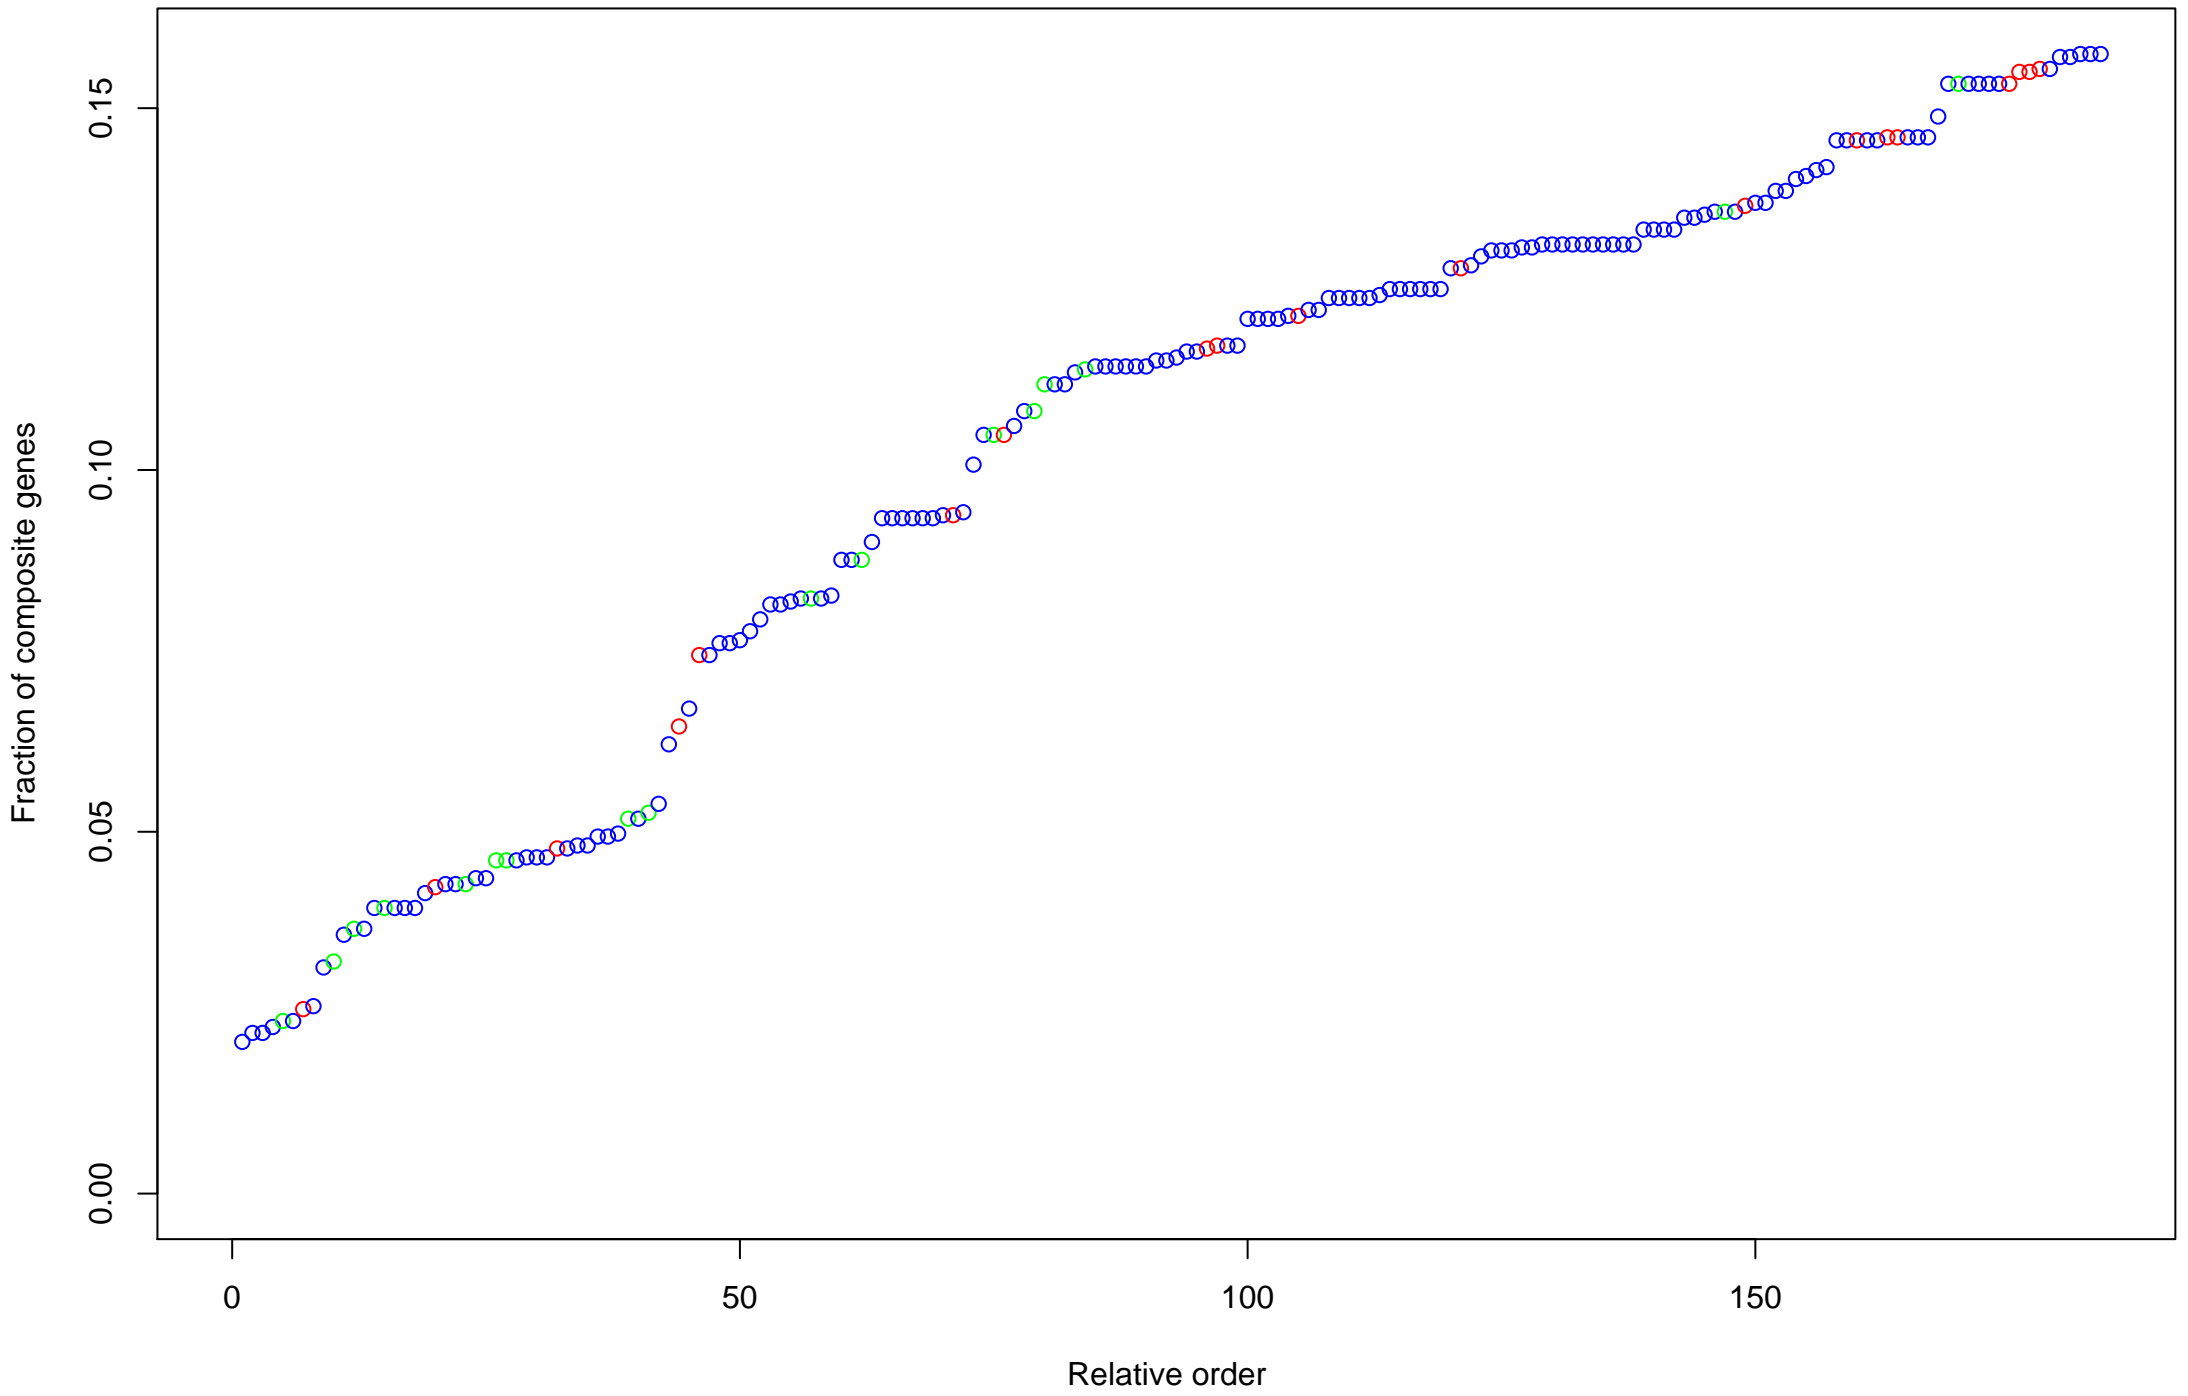

# LPLA-WCF-01 (*Lactobacillus plantarum*)

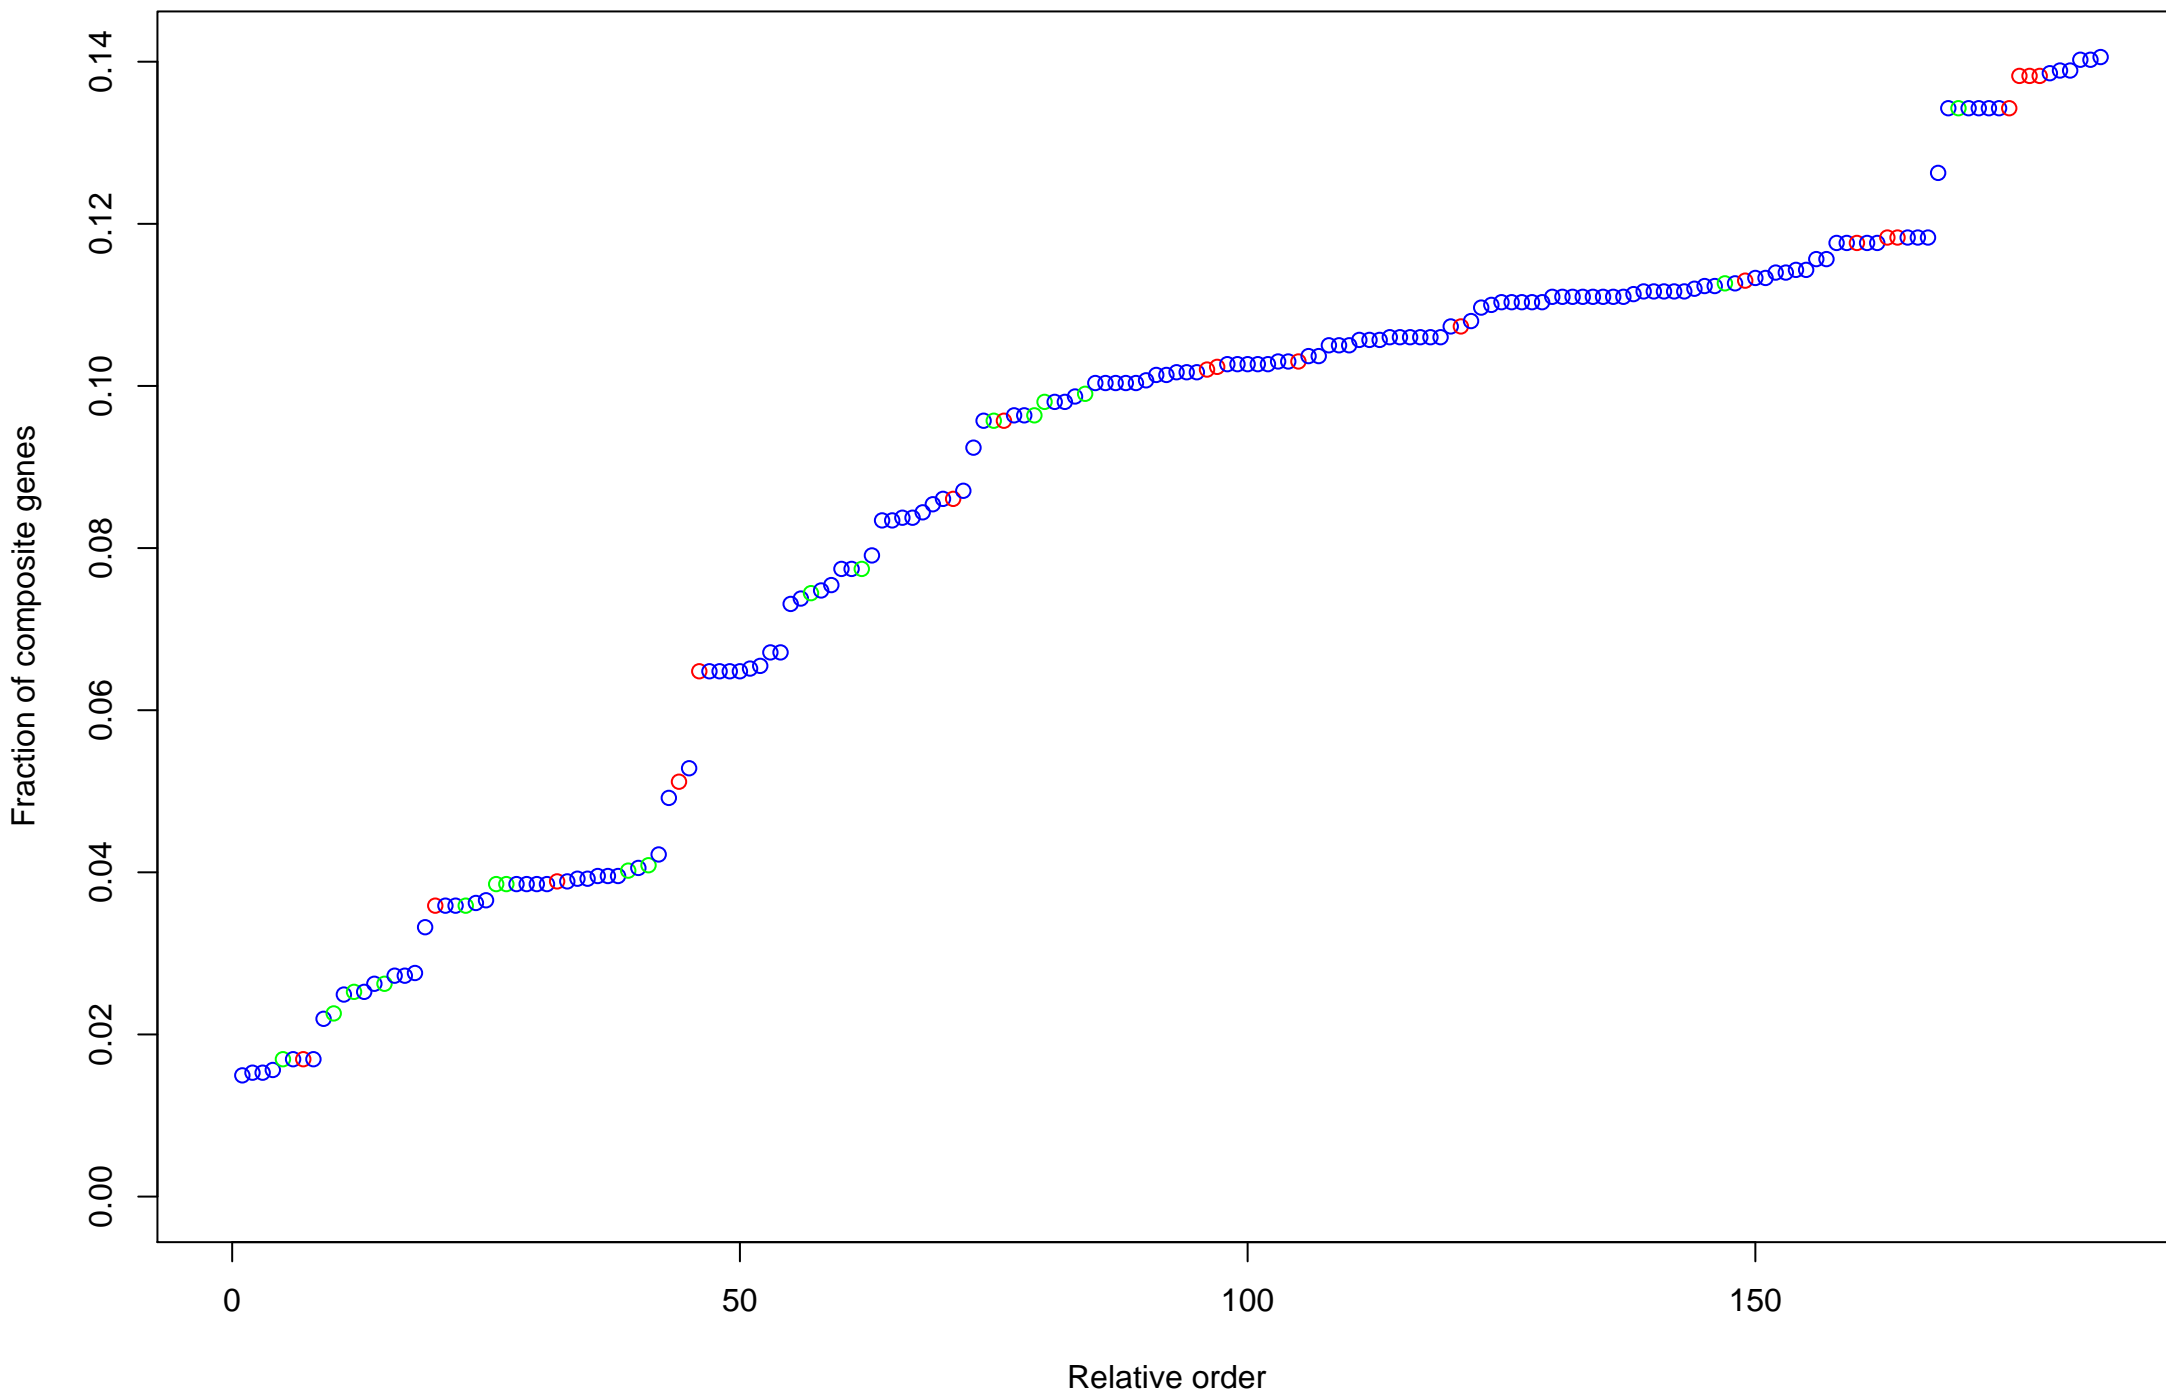

# TWHI-TW0-01 (*Tropheryma whipplei*)

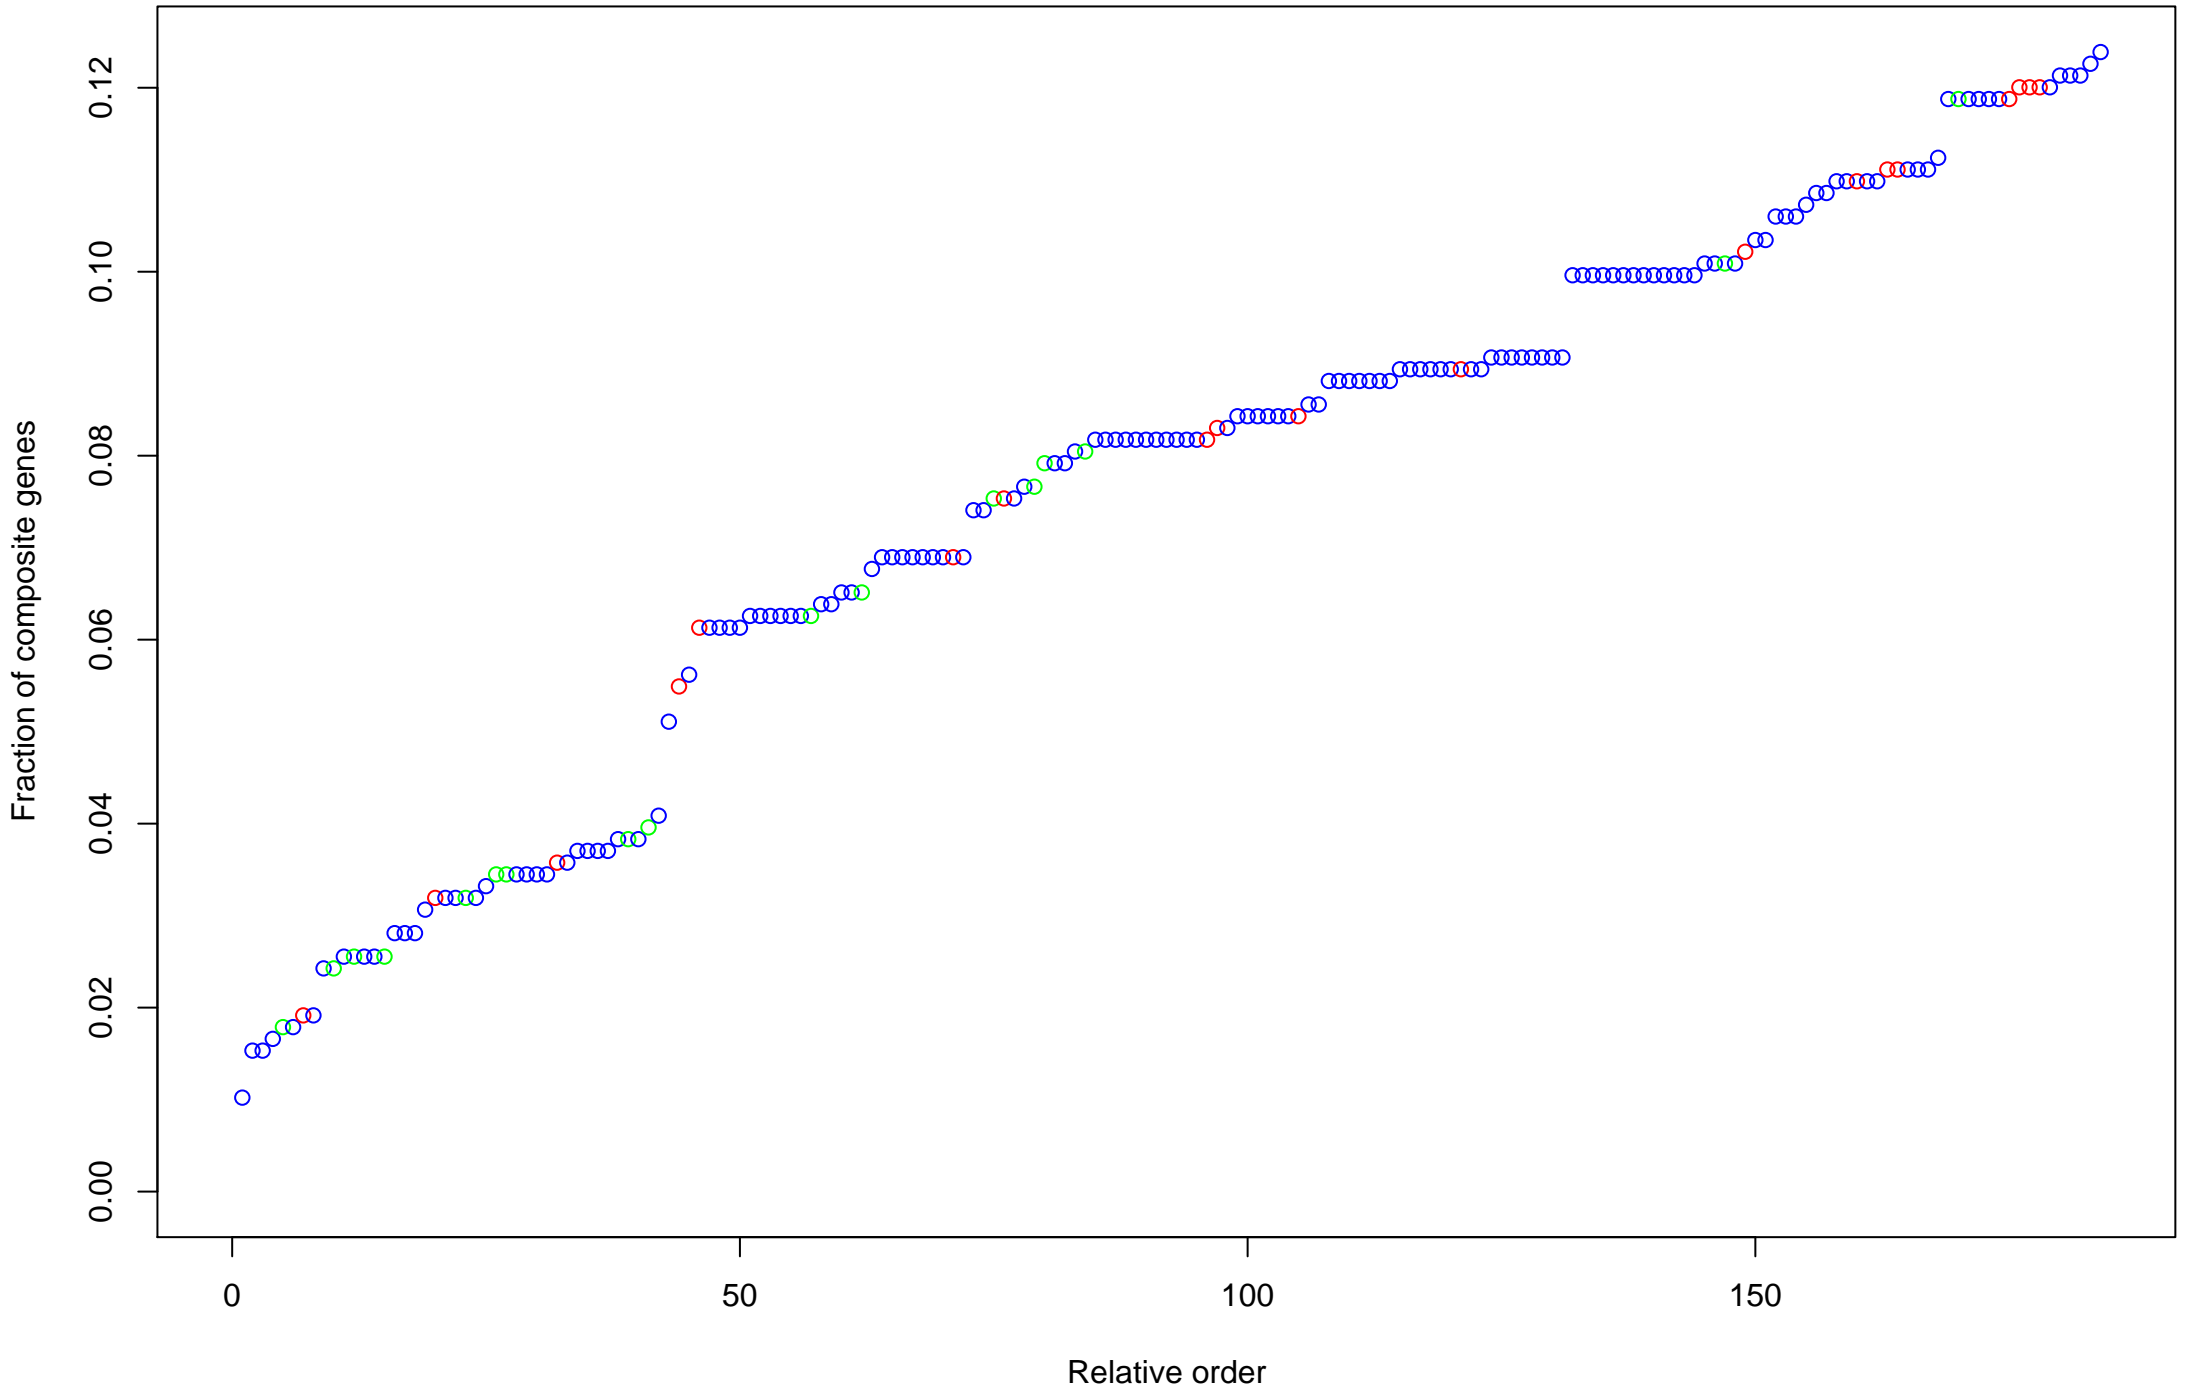



# VPAR-RIM-01 (*Vibrio parahaemolyticus*)

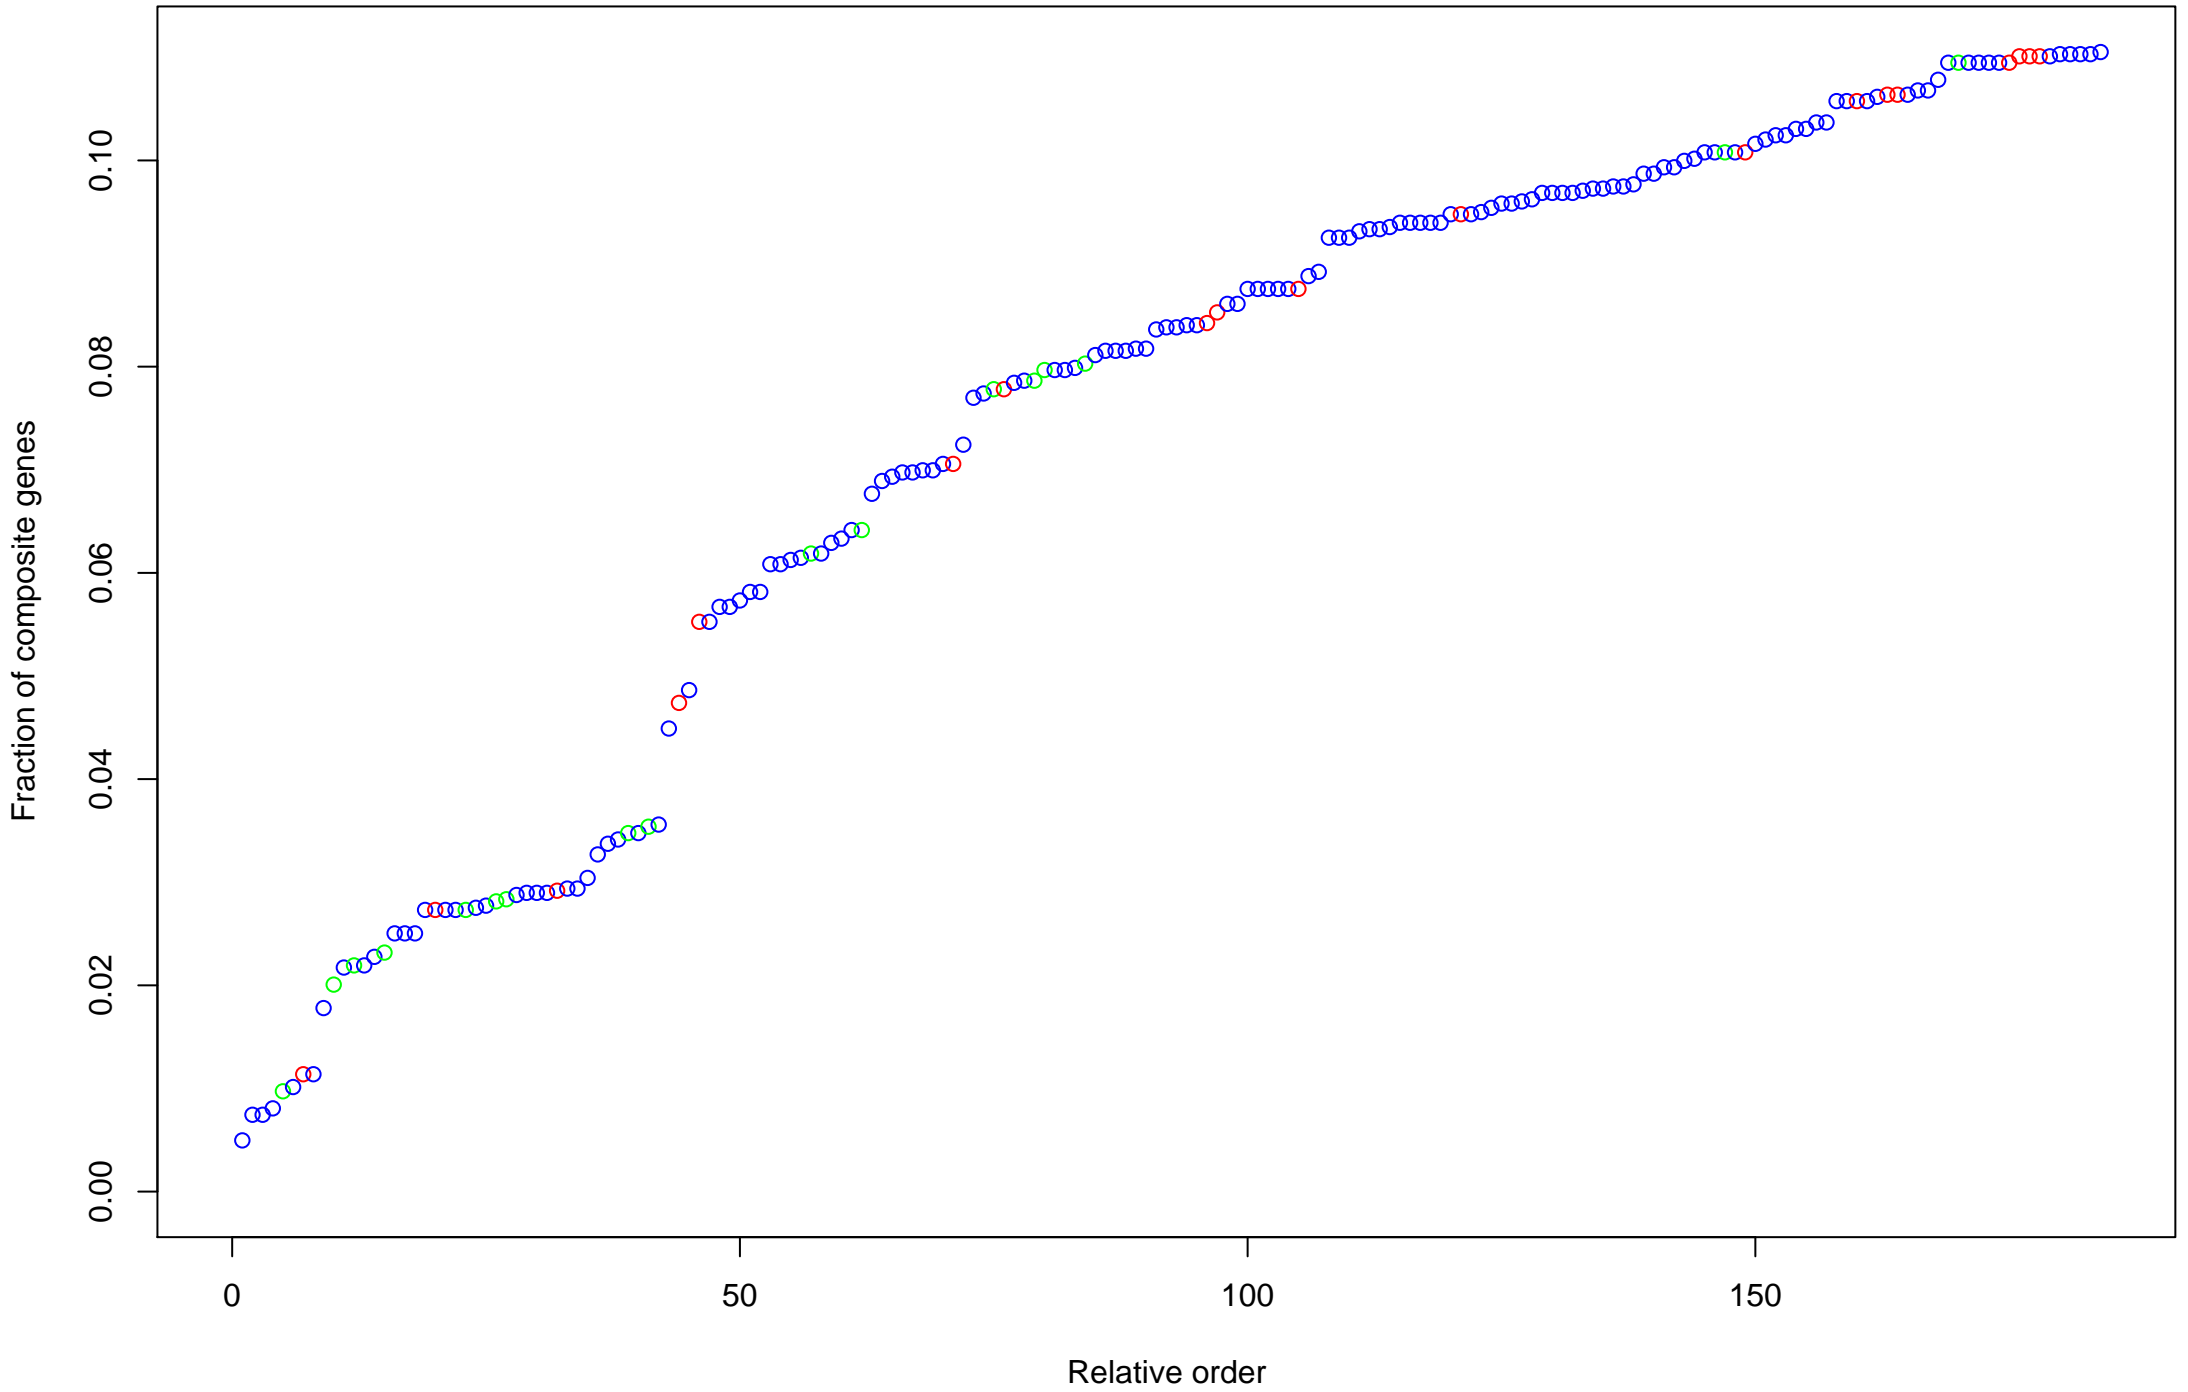

# SAVE-XXX-01 (*Streptomyces avermitilis*)

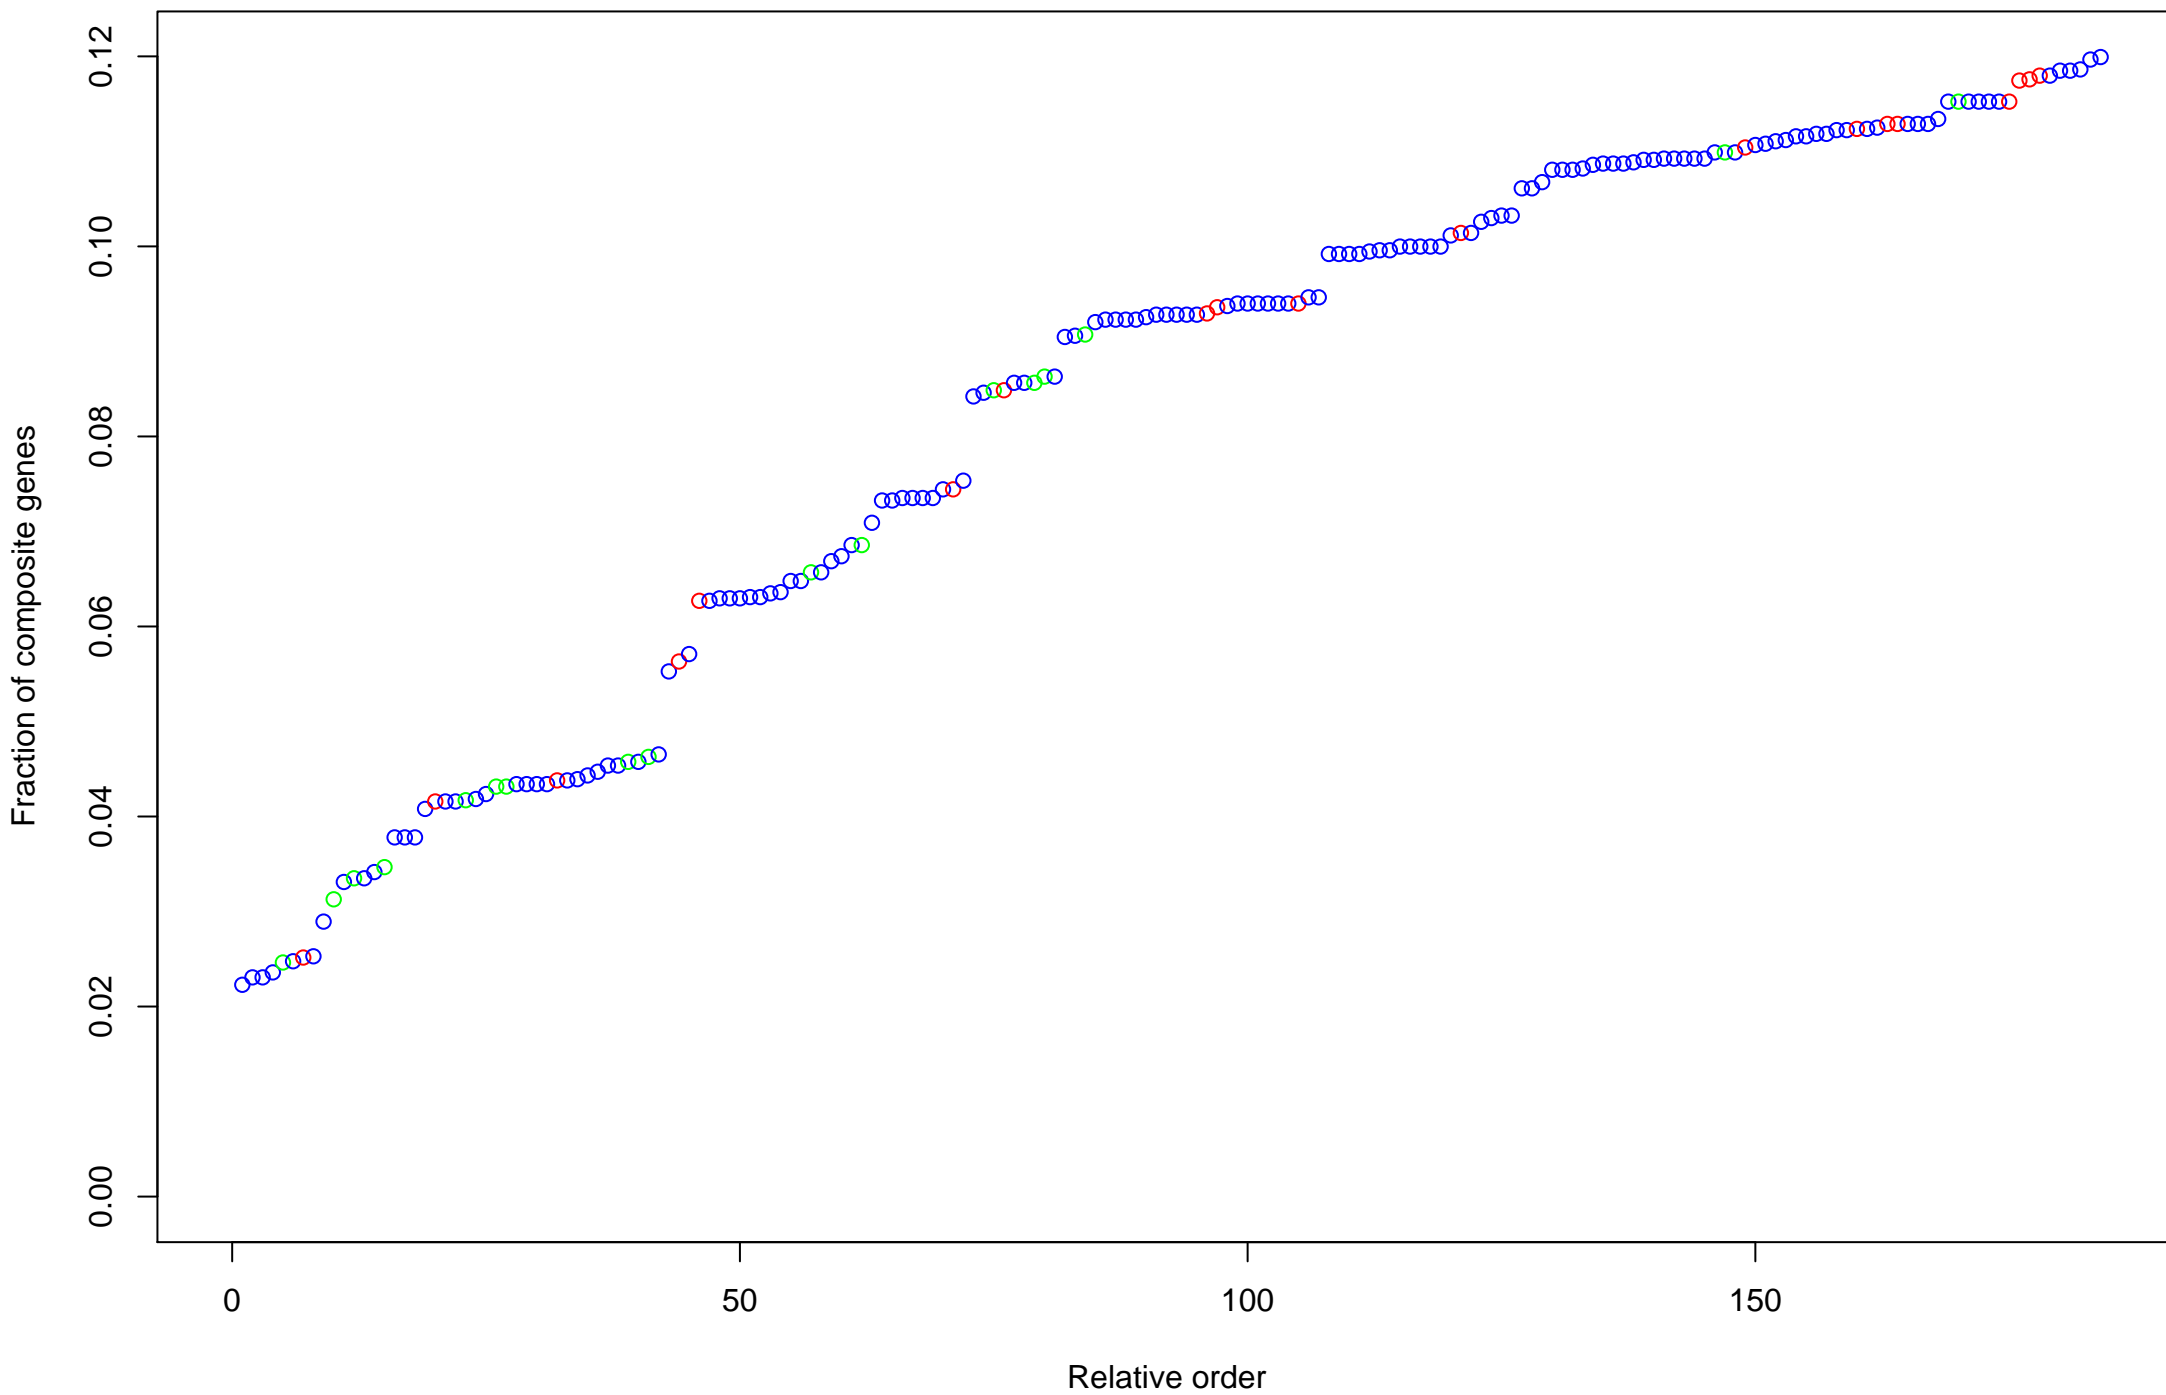

# BTHE-VPI-01 (*Bacteroides thetaiotaomicron*)

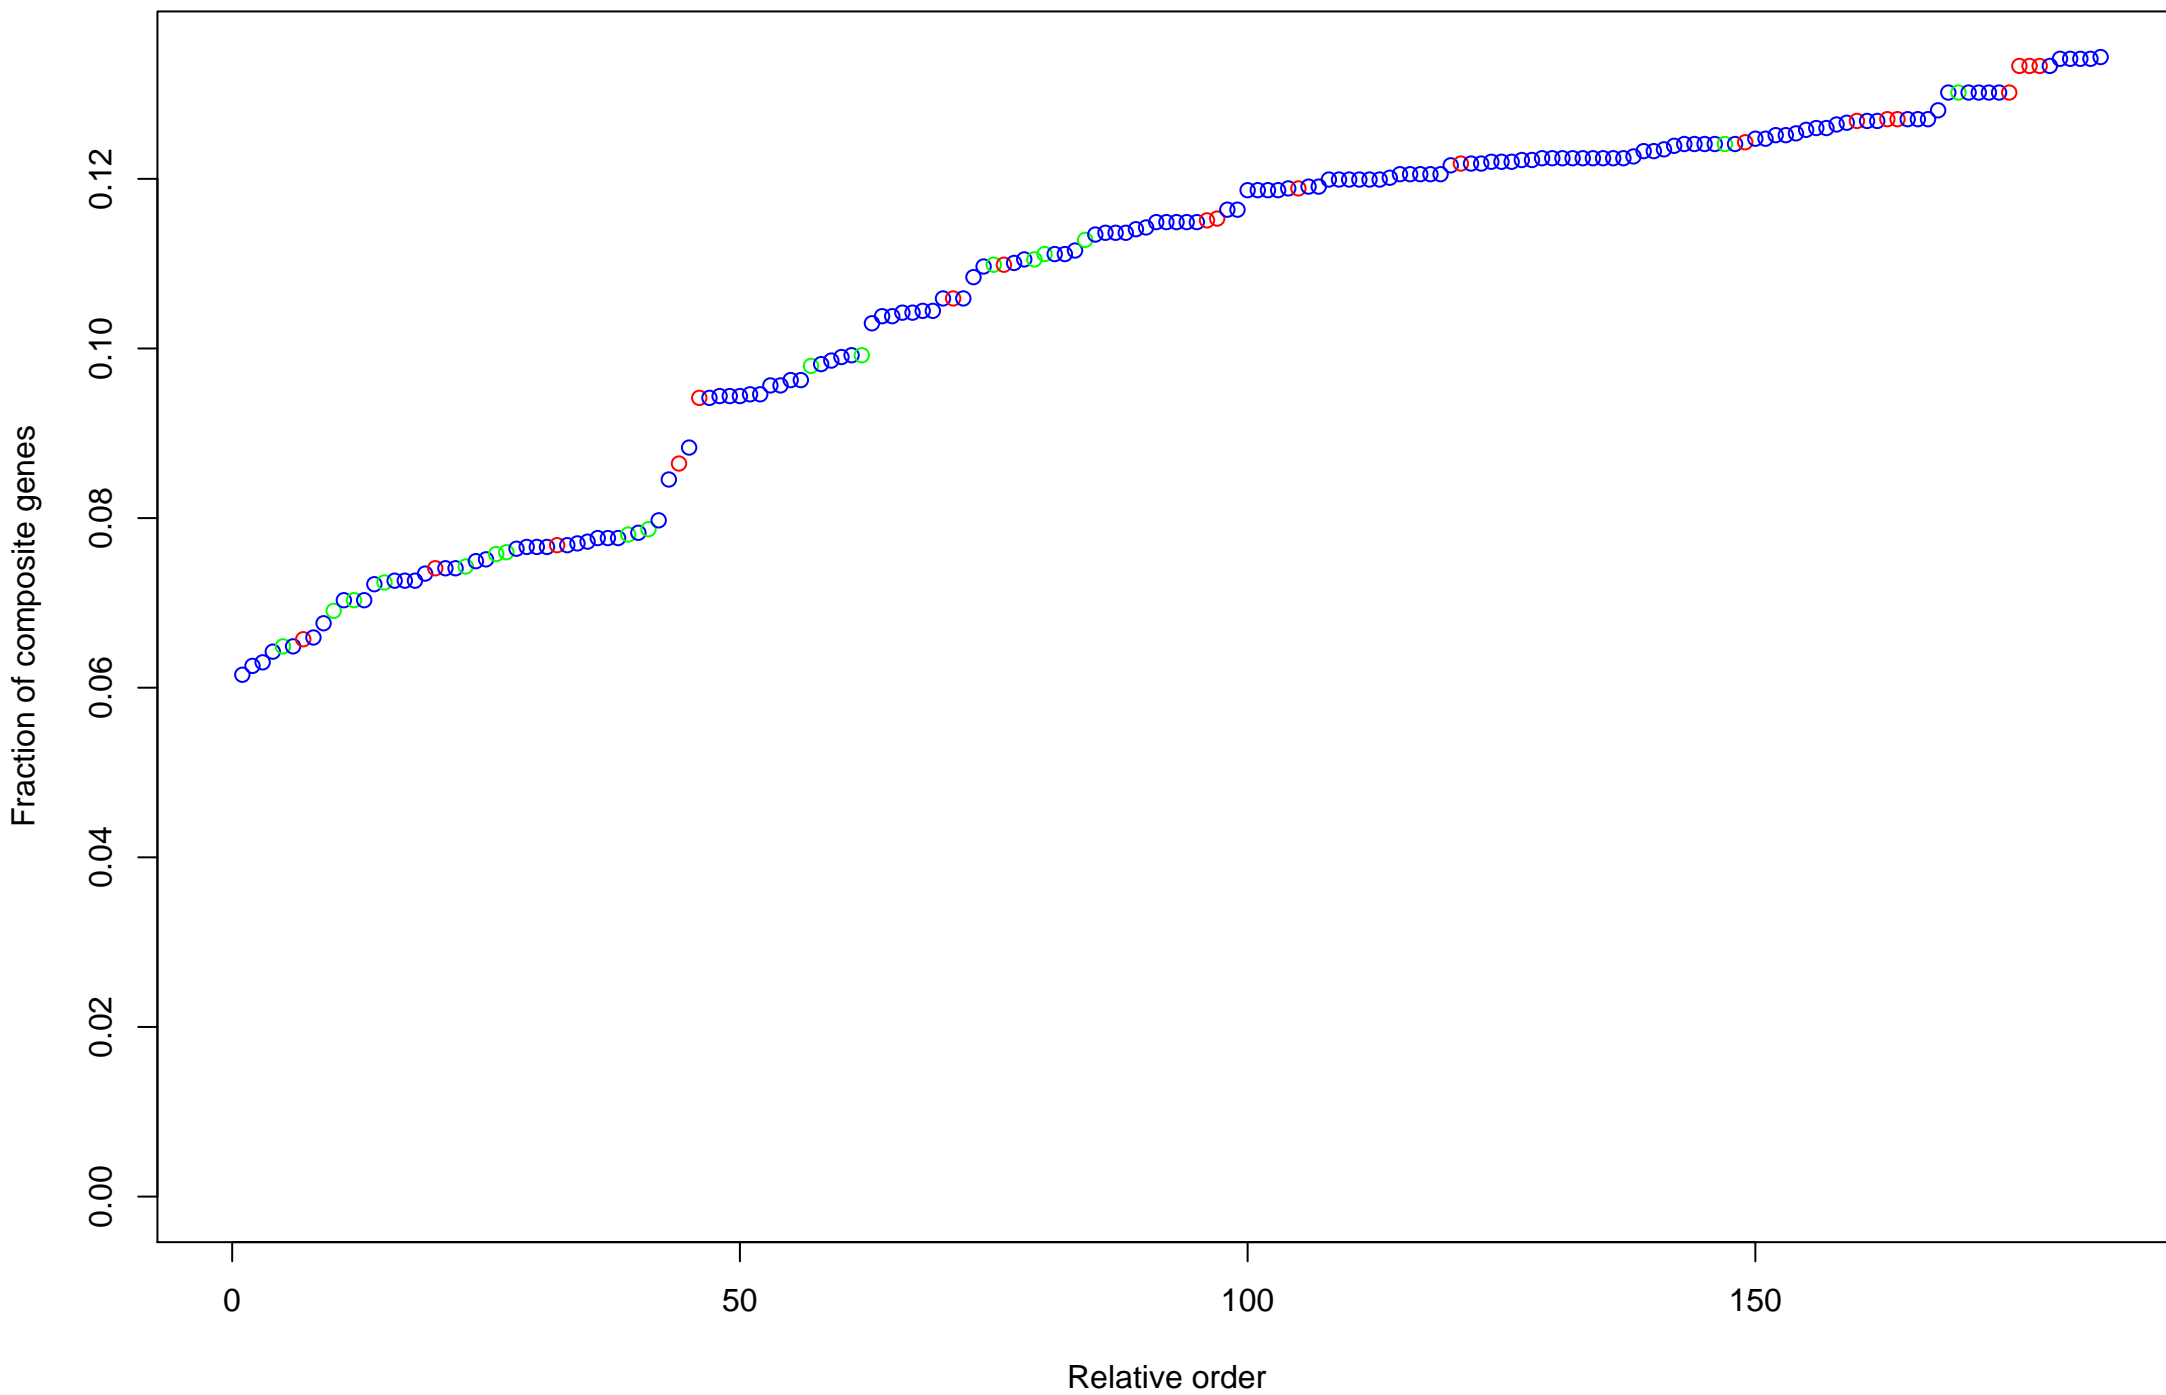

# EFAE-V58-01 (Enterococcus faecalis )

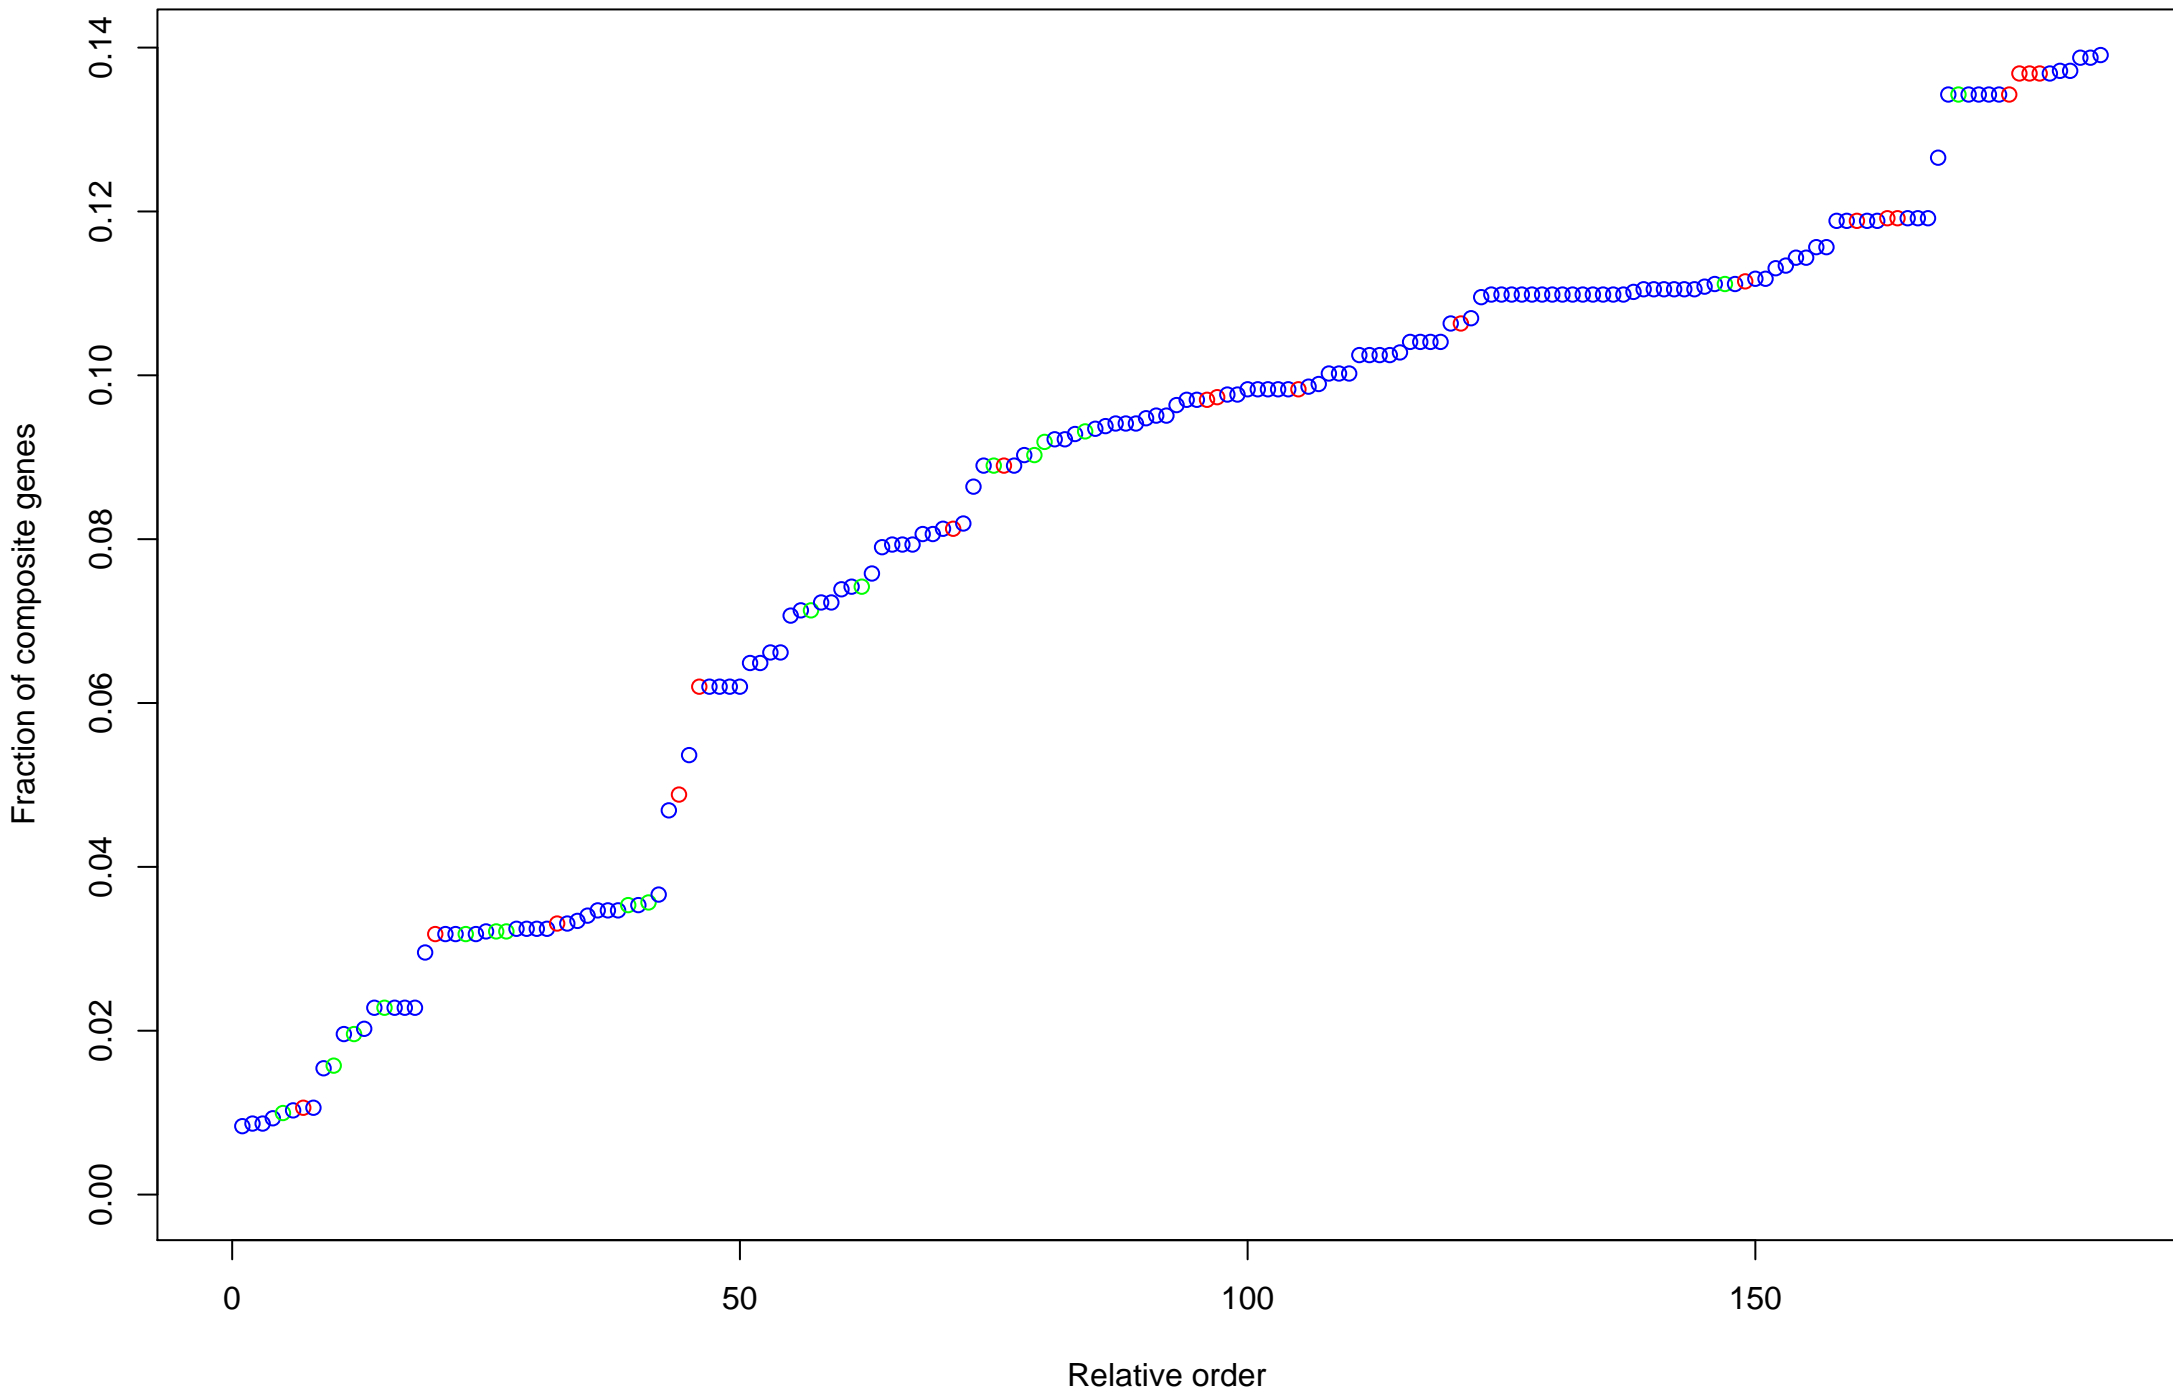

# SENT-TY2-01 (*Salmonella enterica*)

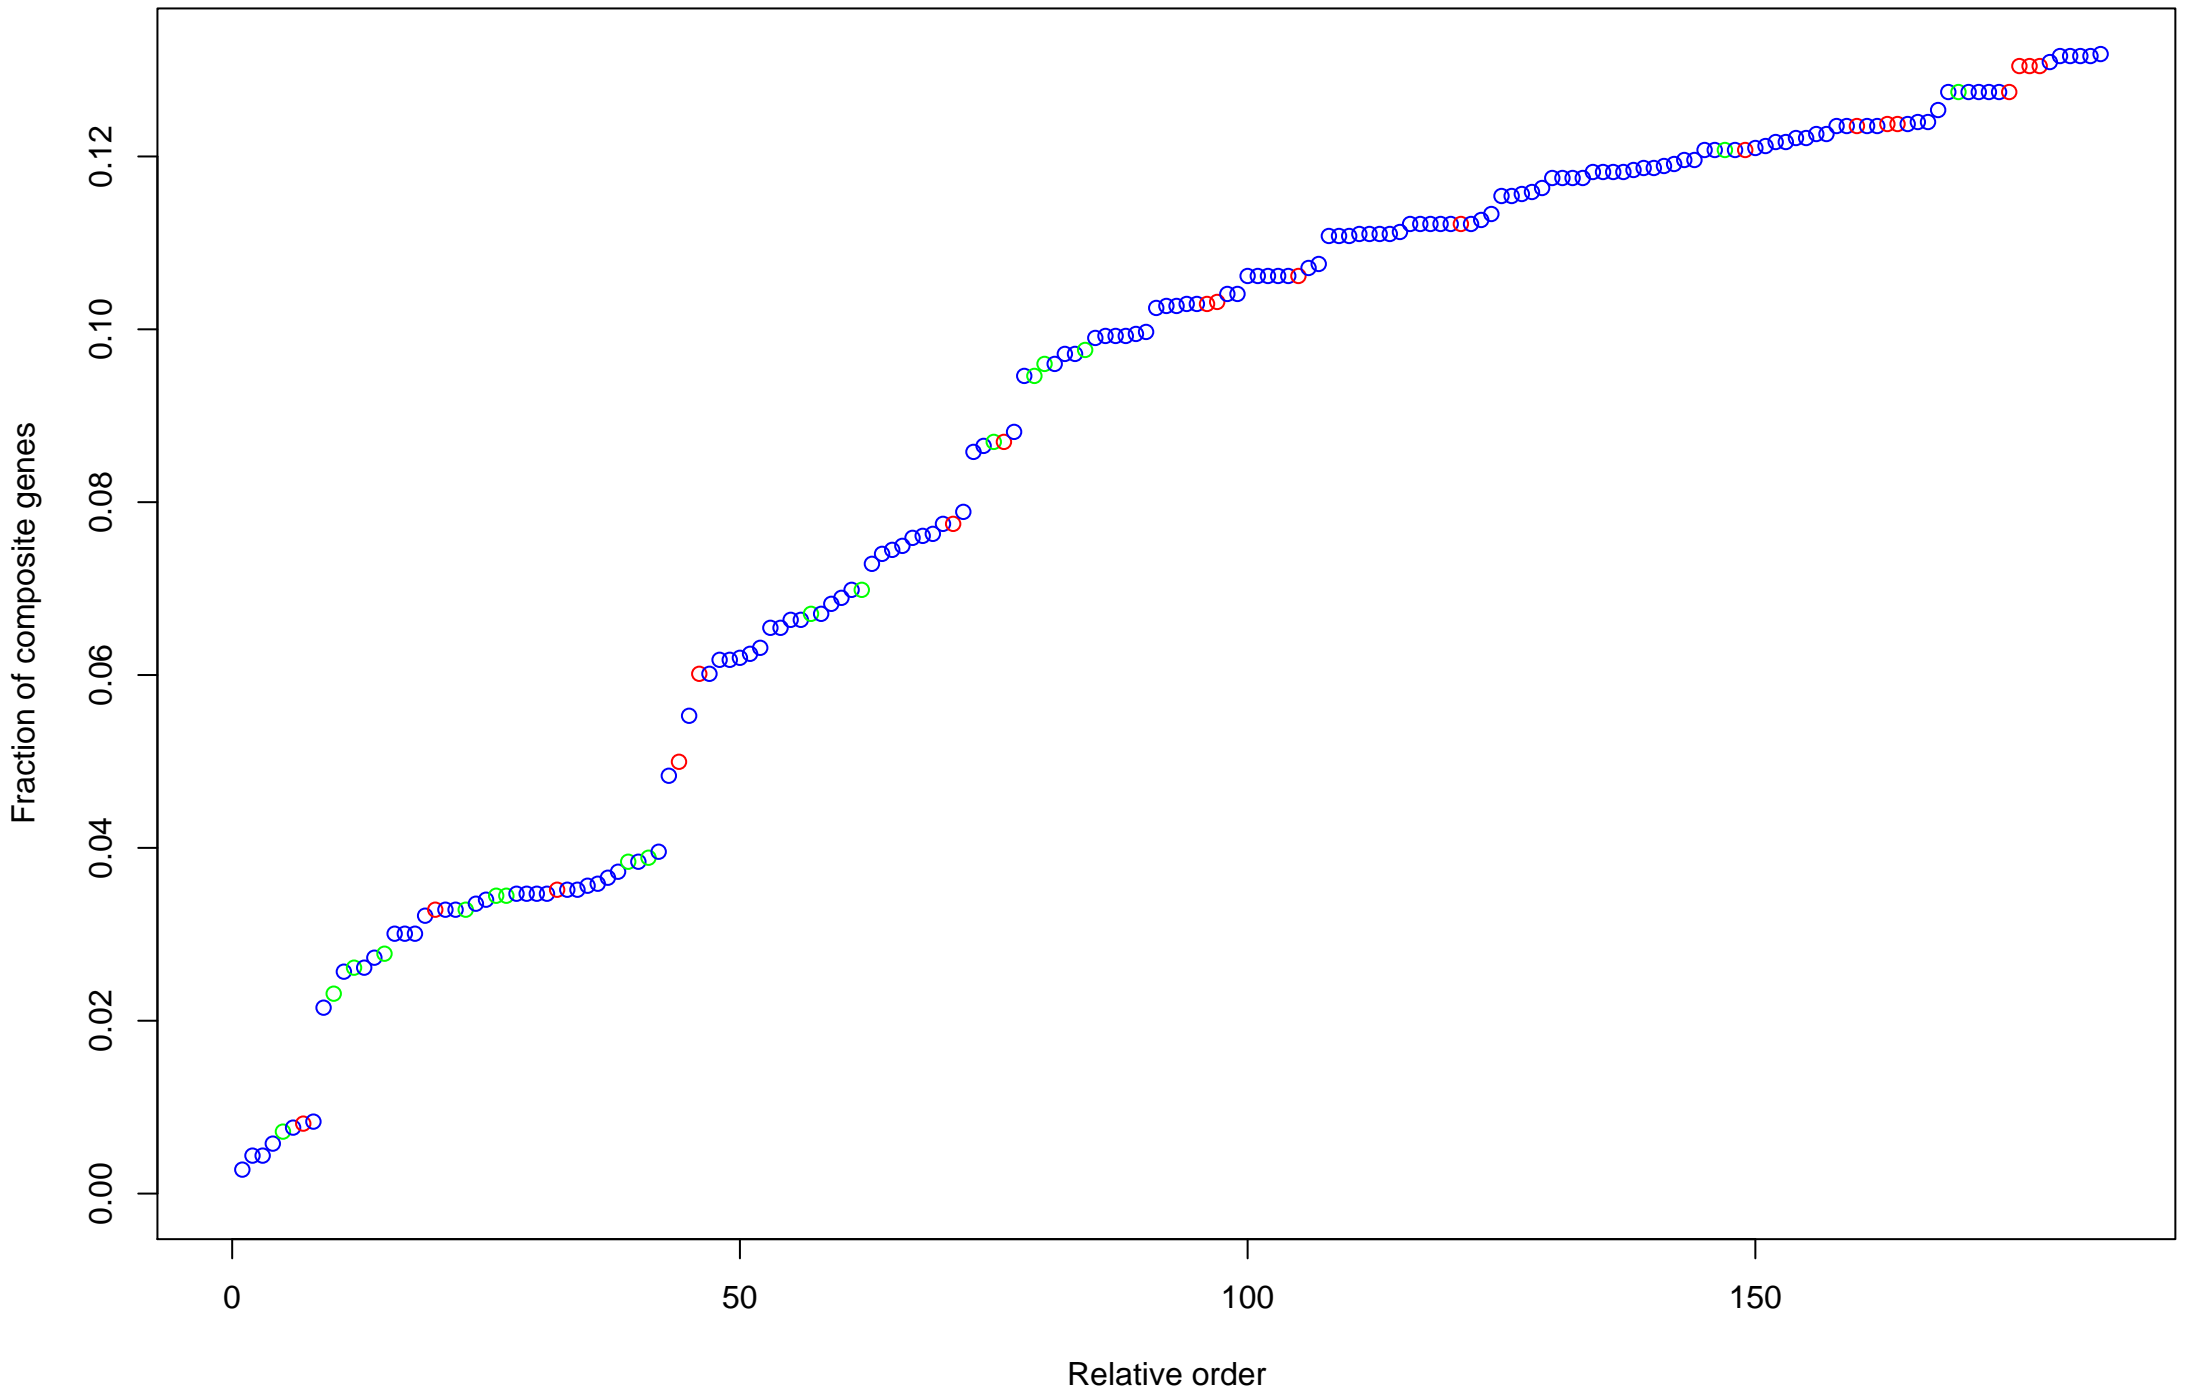

# CCAV-GPI-01 (*Chlamydomonas reinhardtii*)

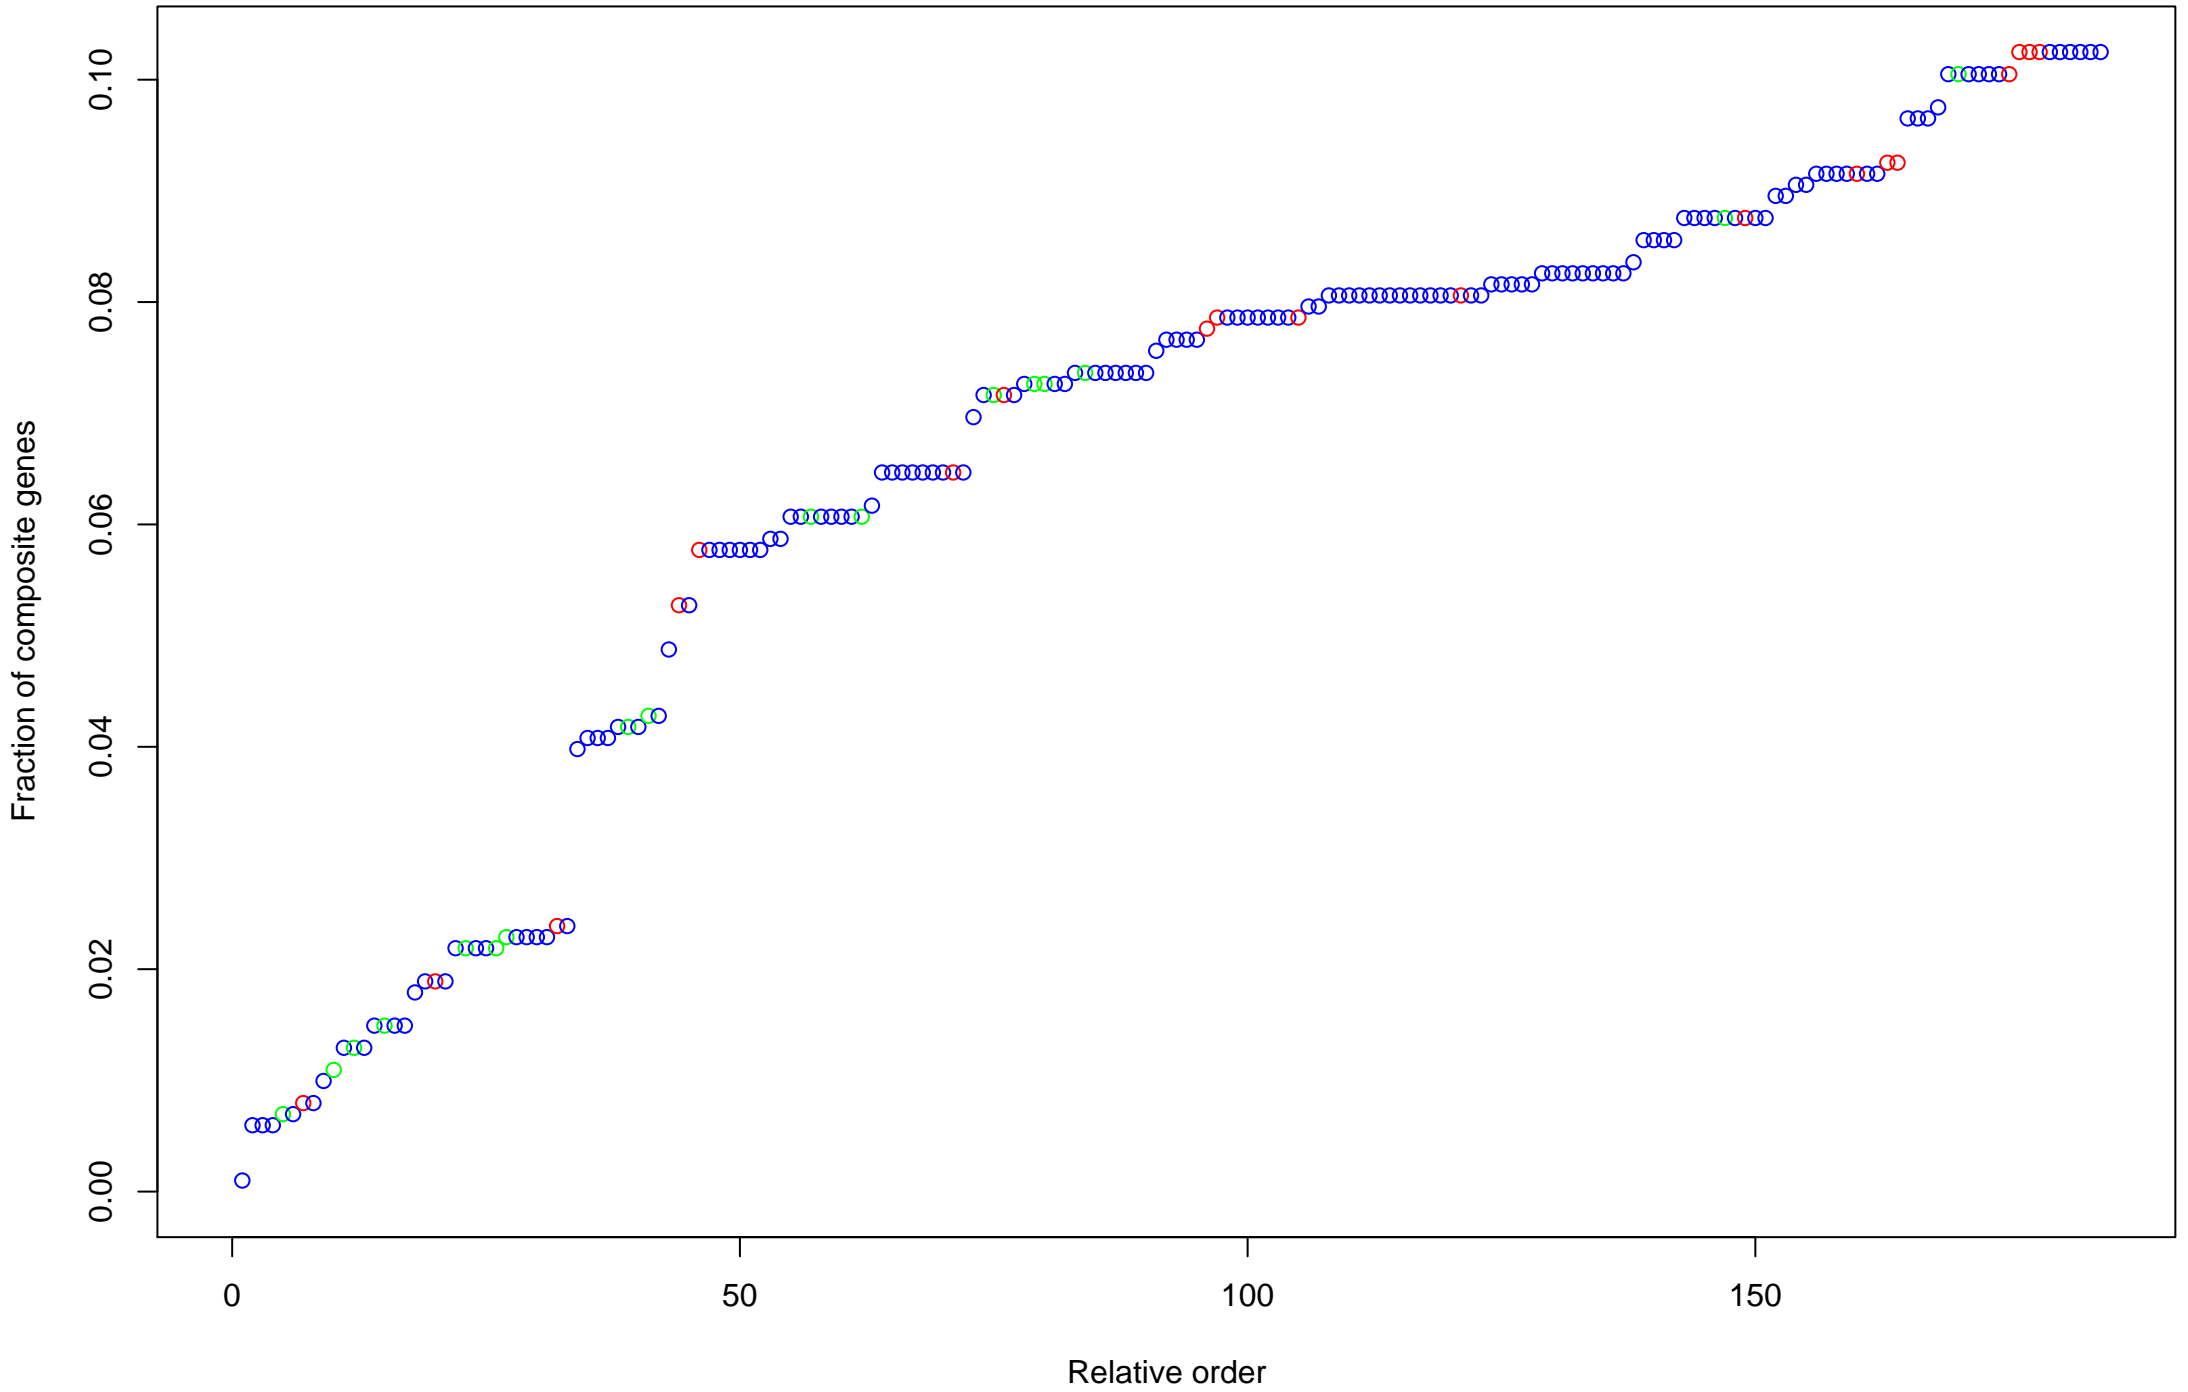

# CBUR-RSA-01 (*Coxiella burnetii*)

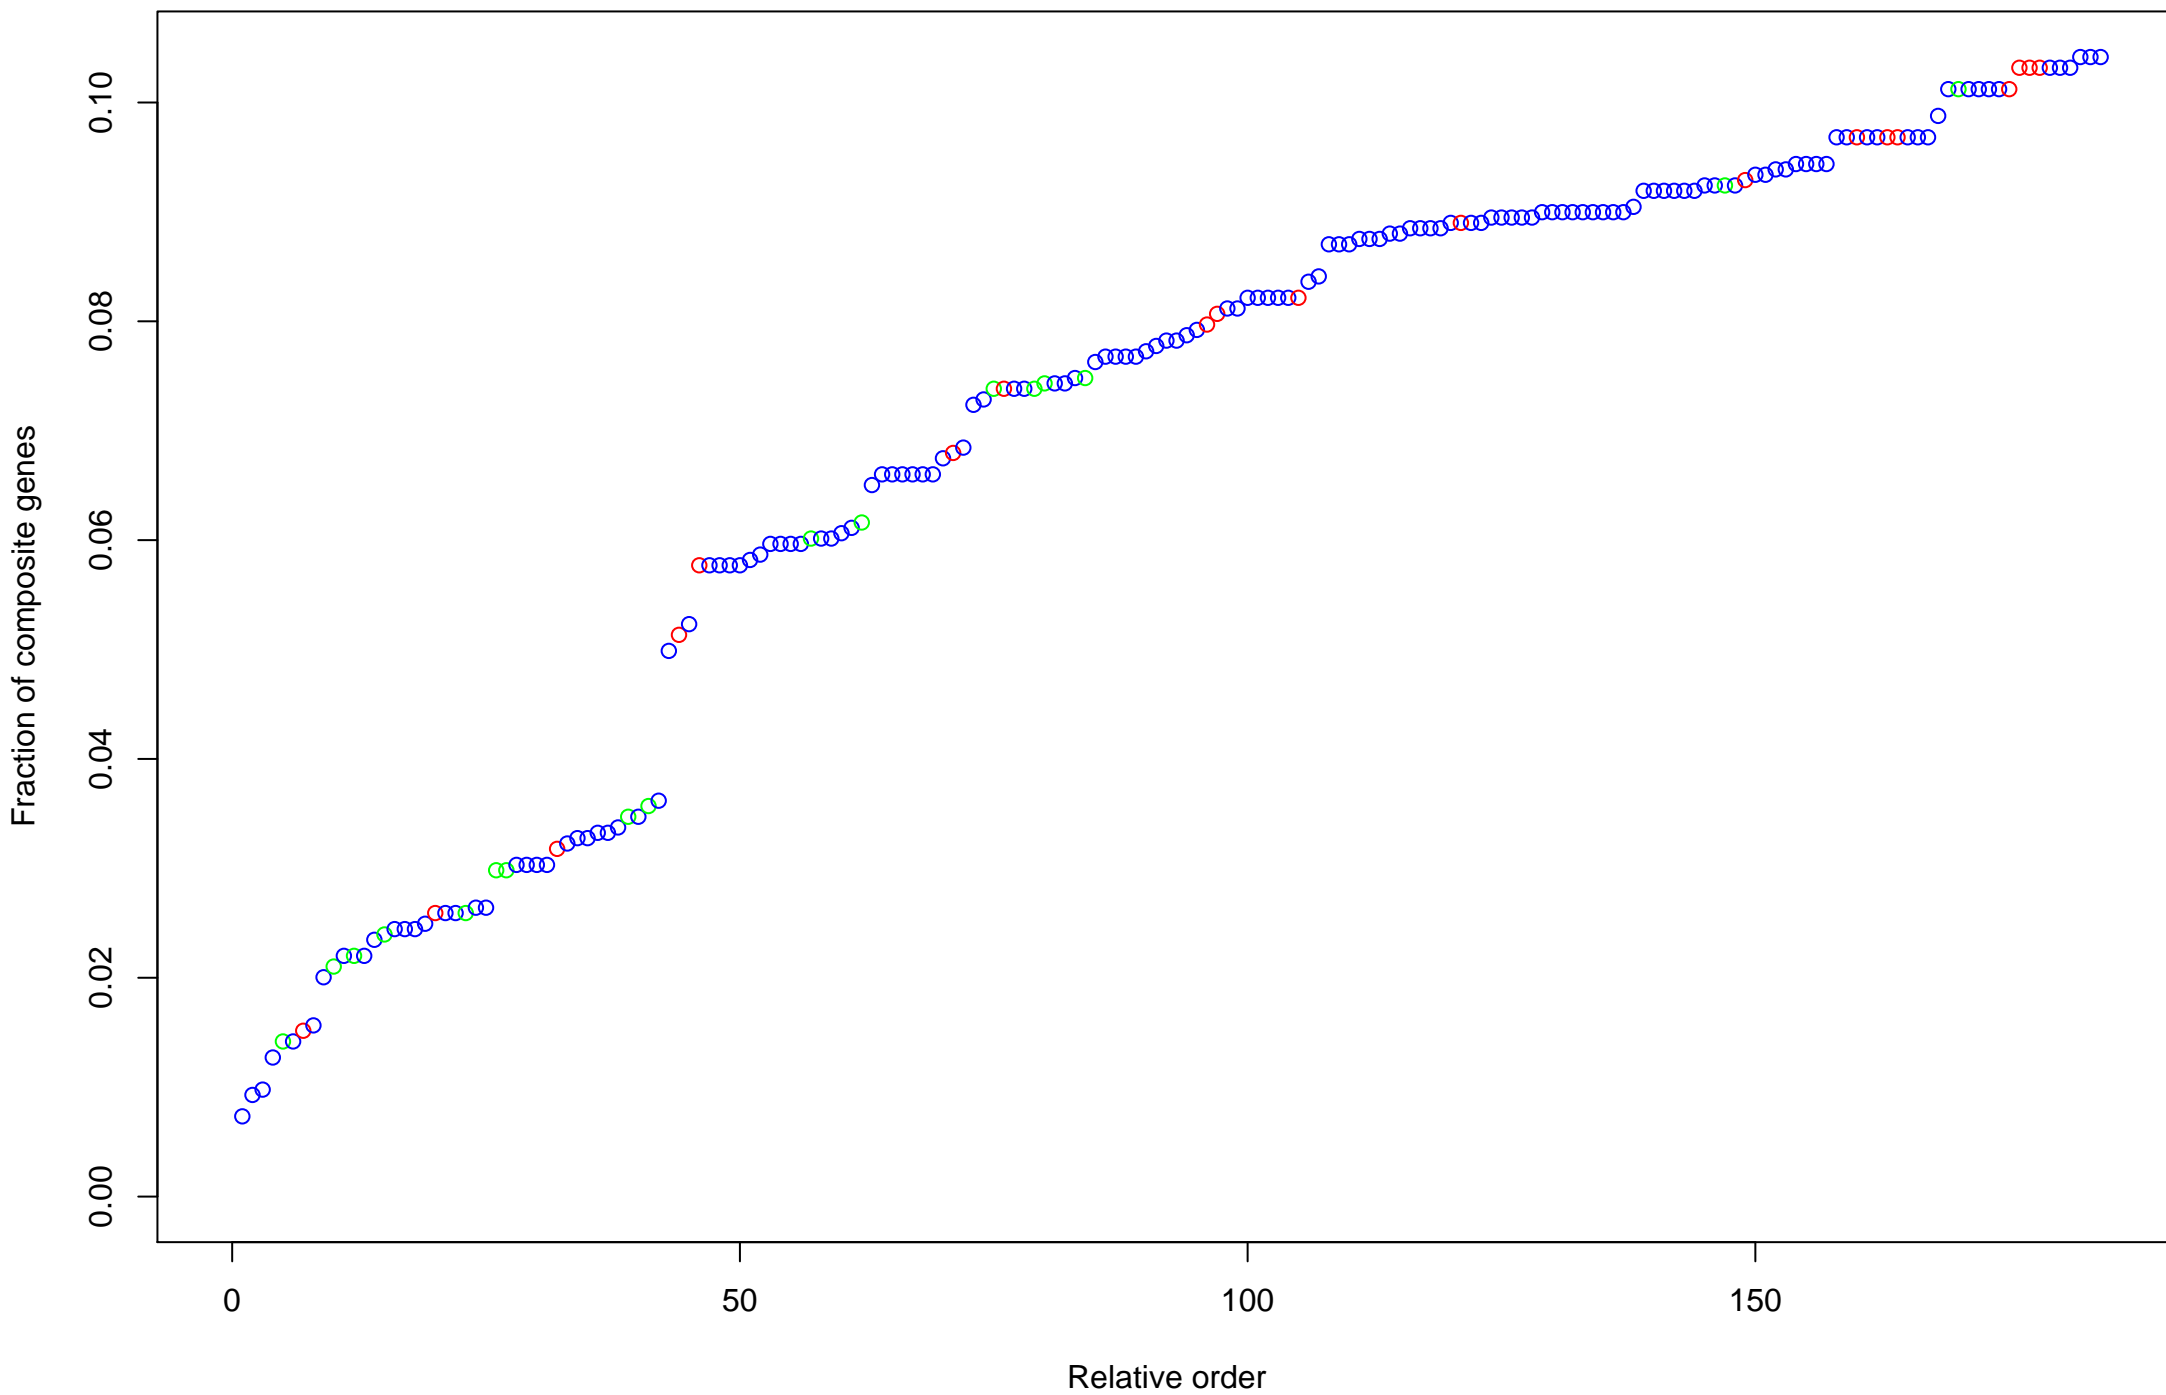

# LINT-566-01 (*Leptospira interrogans*)

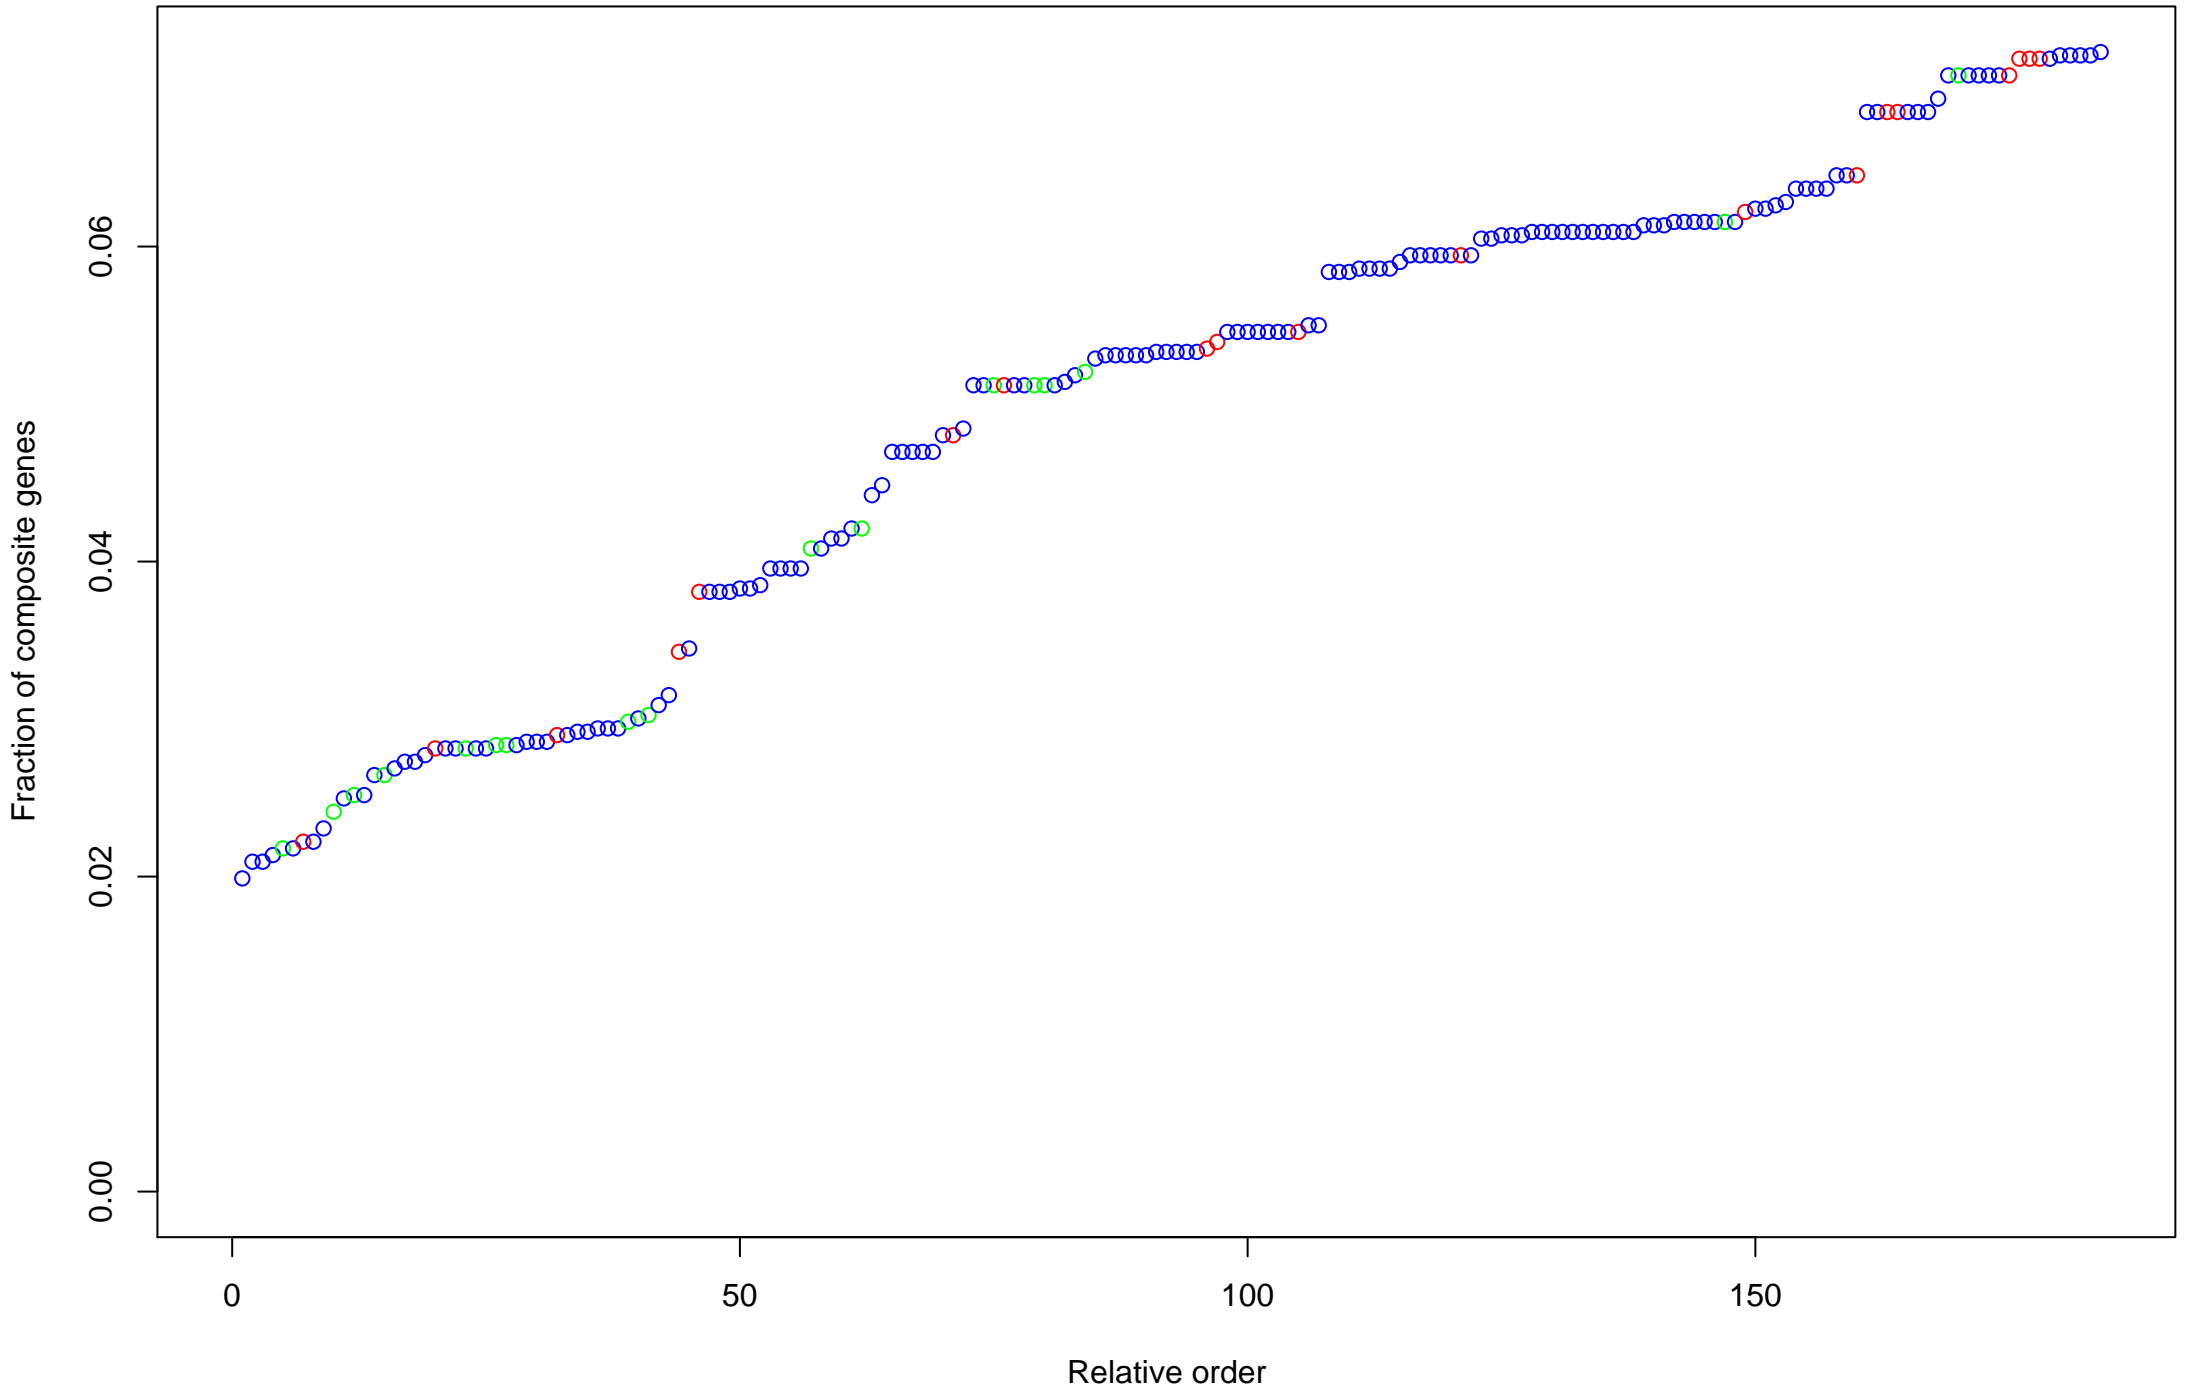



# NCRA-XX3-01 (*Neurospora crassa*)

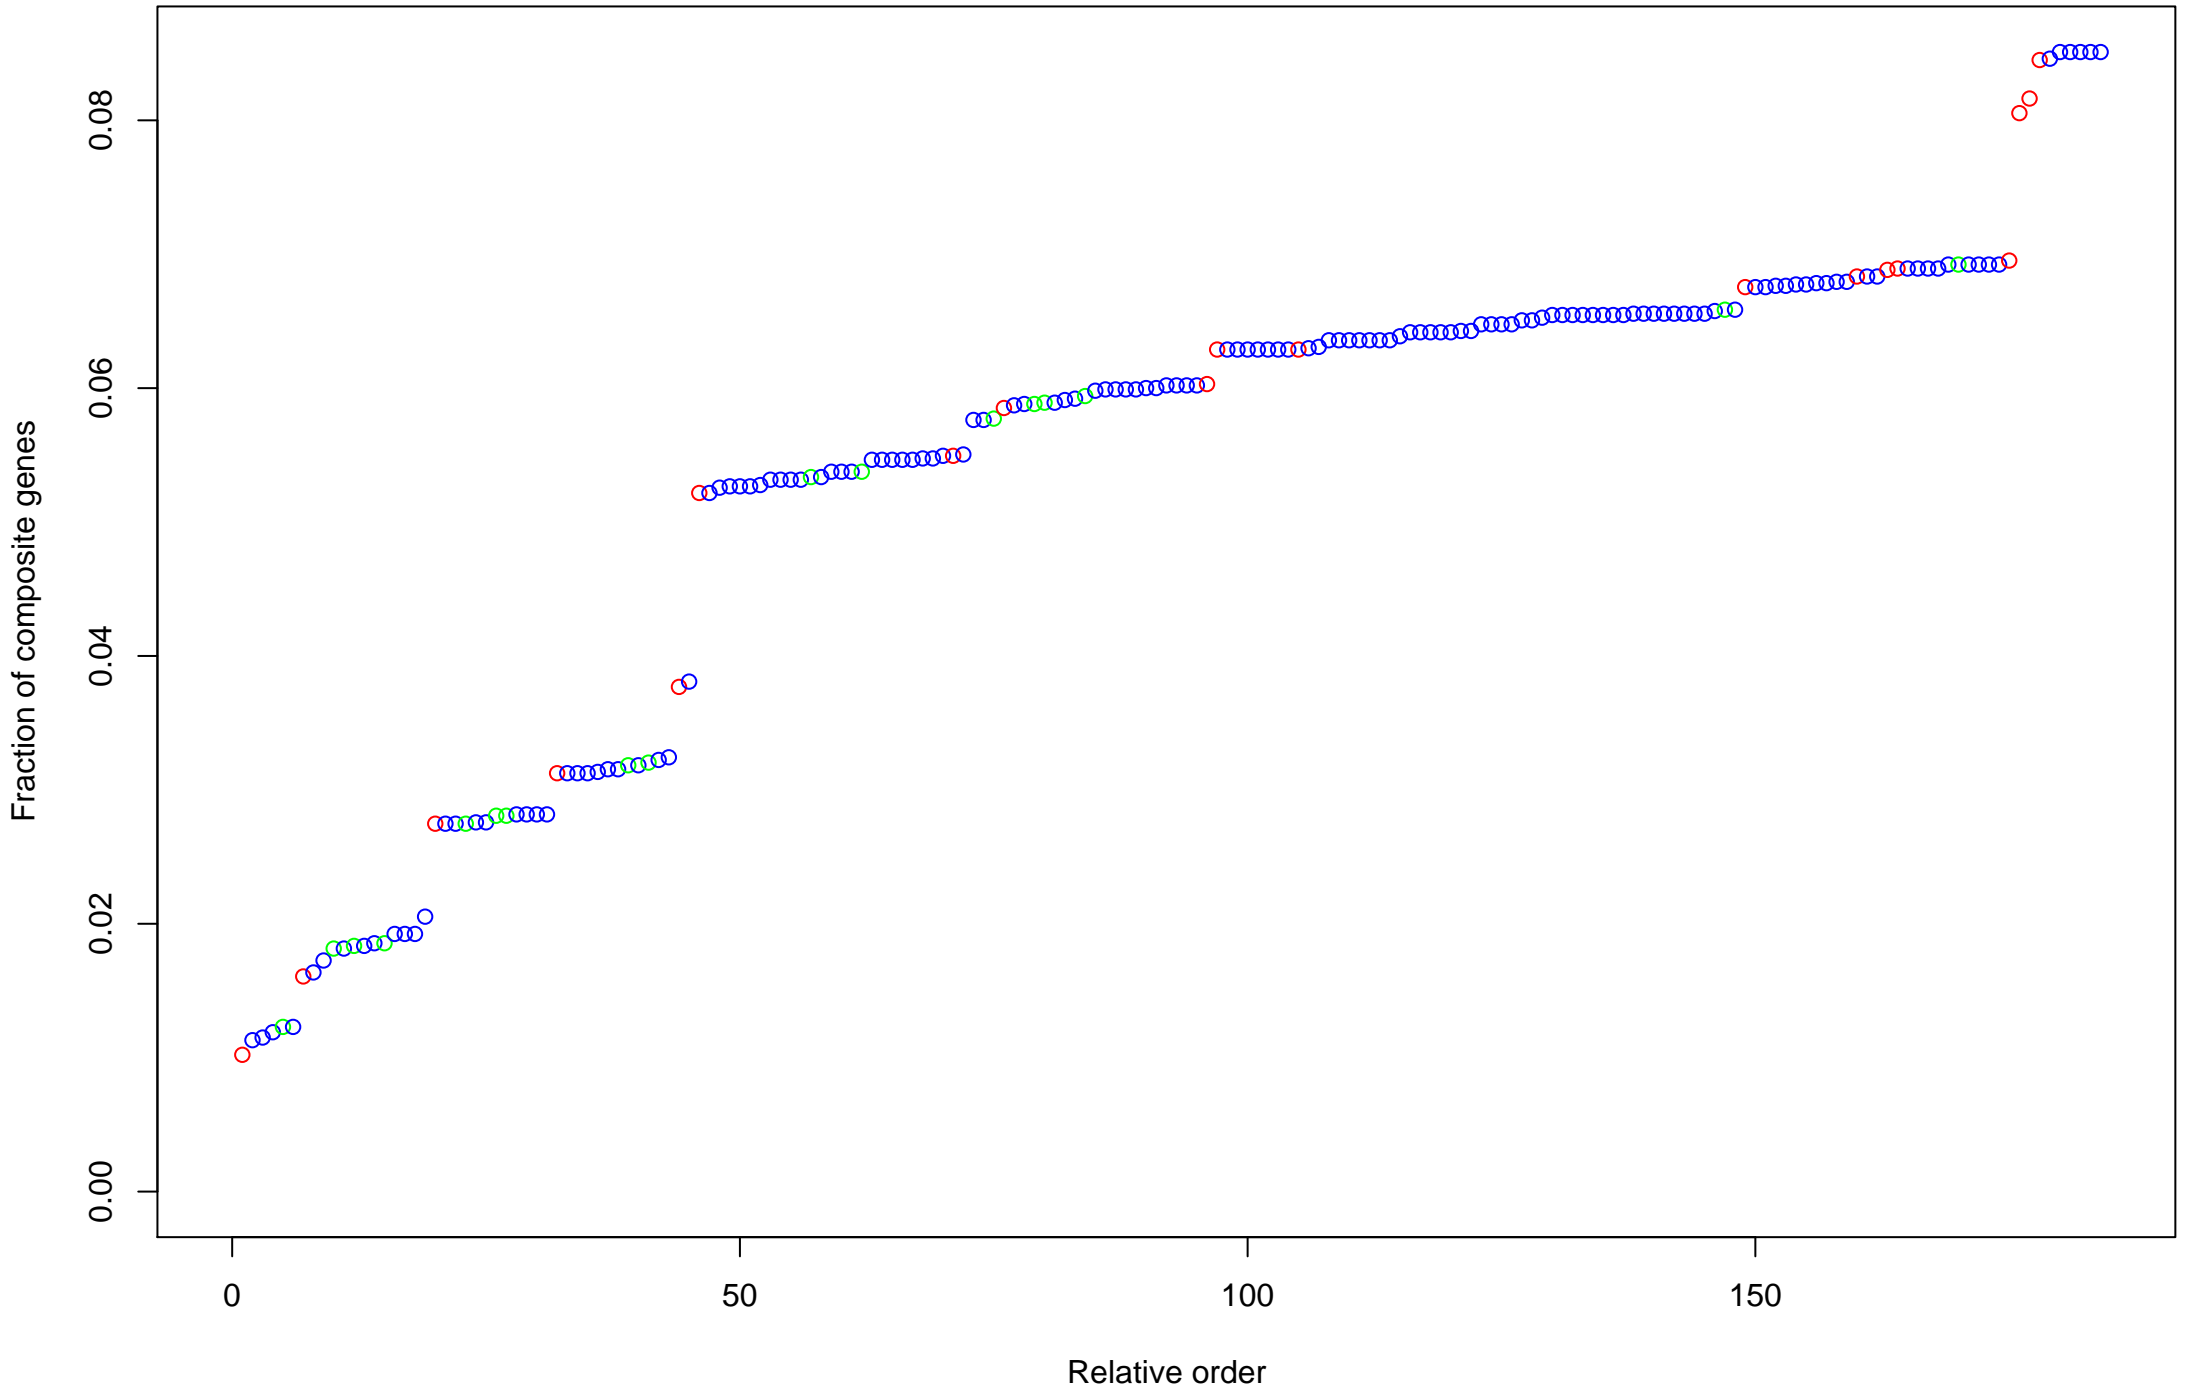

# BANT-AME-01 (*Bacillus anthracis*)

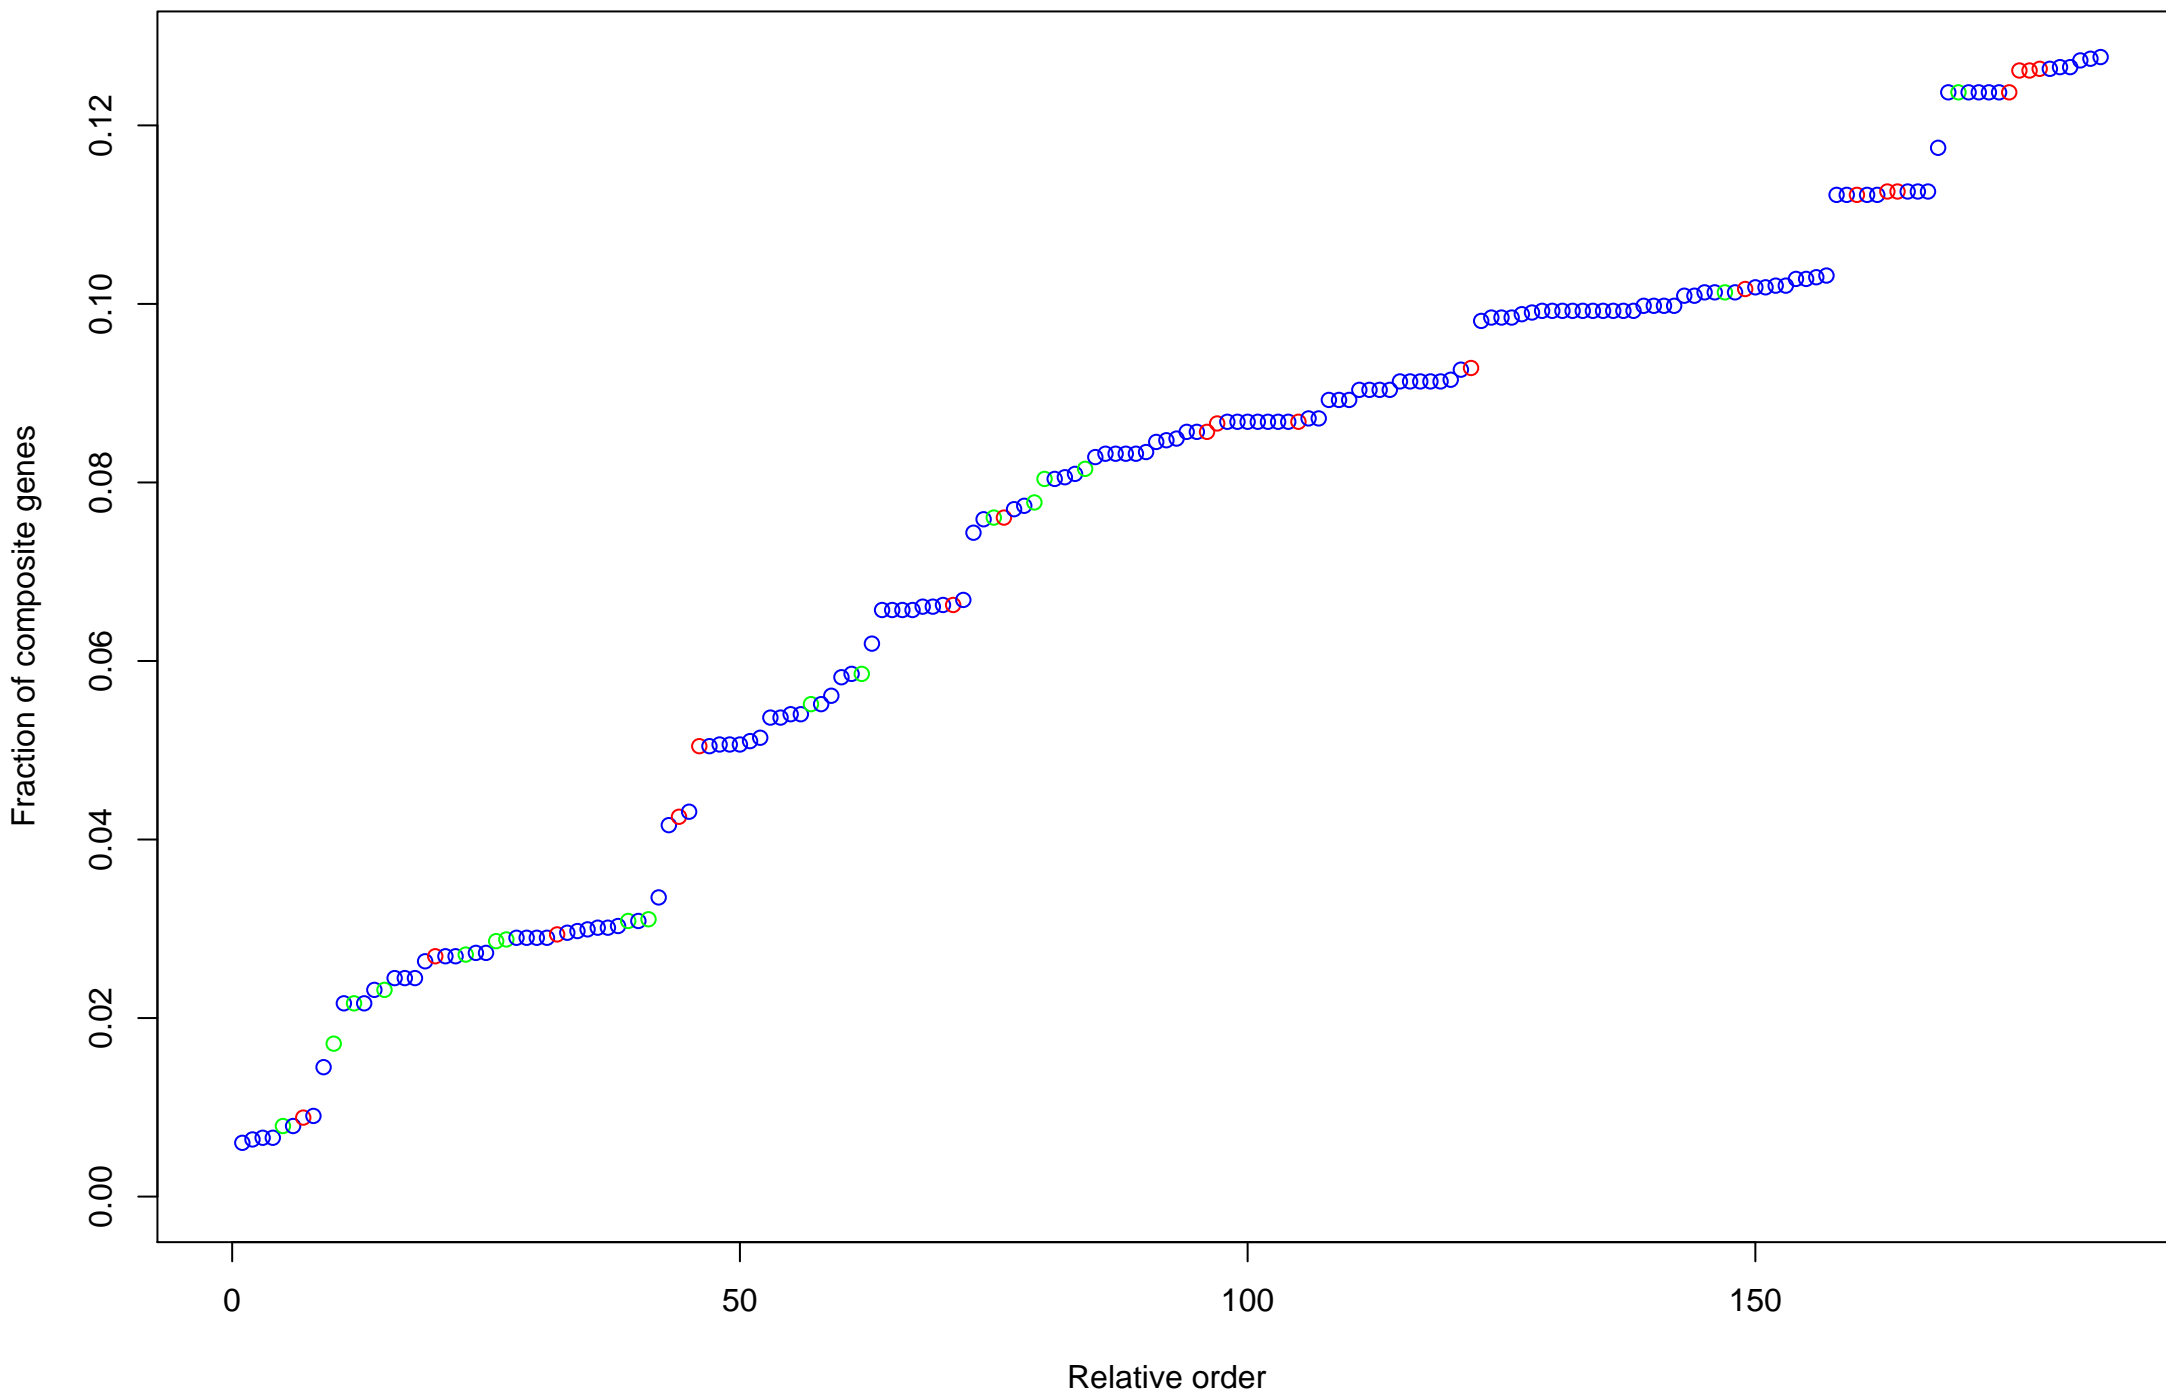

# BCER-579-01 (*Bacillus cereus*)

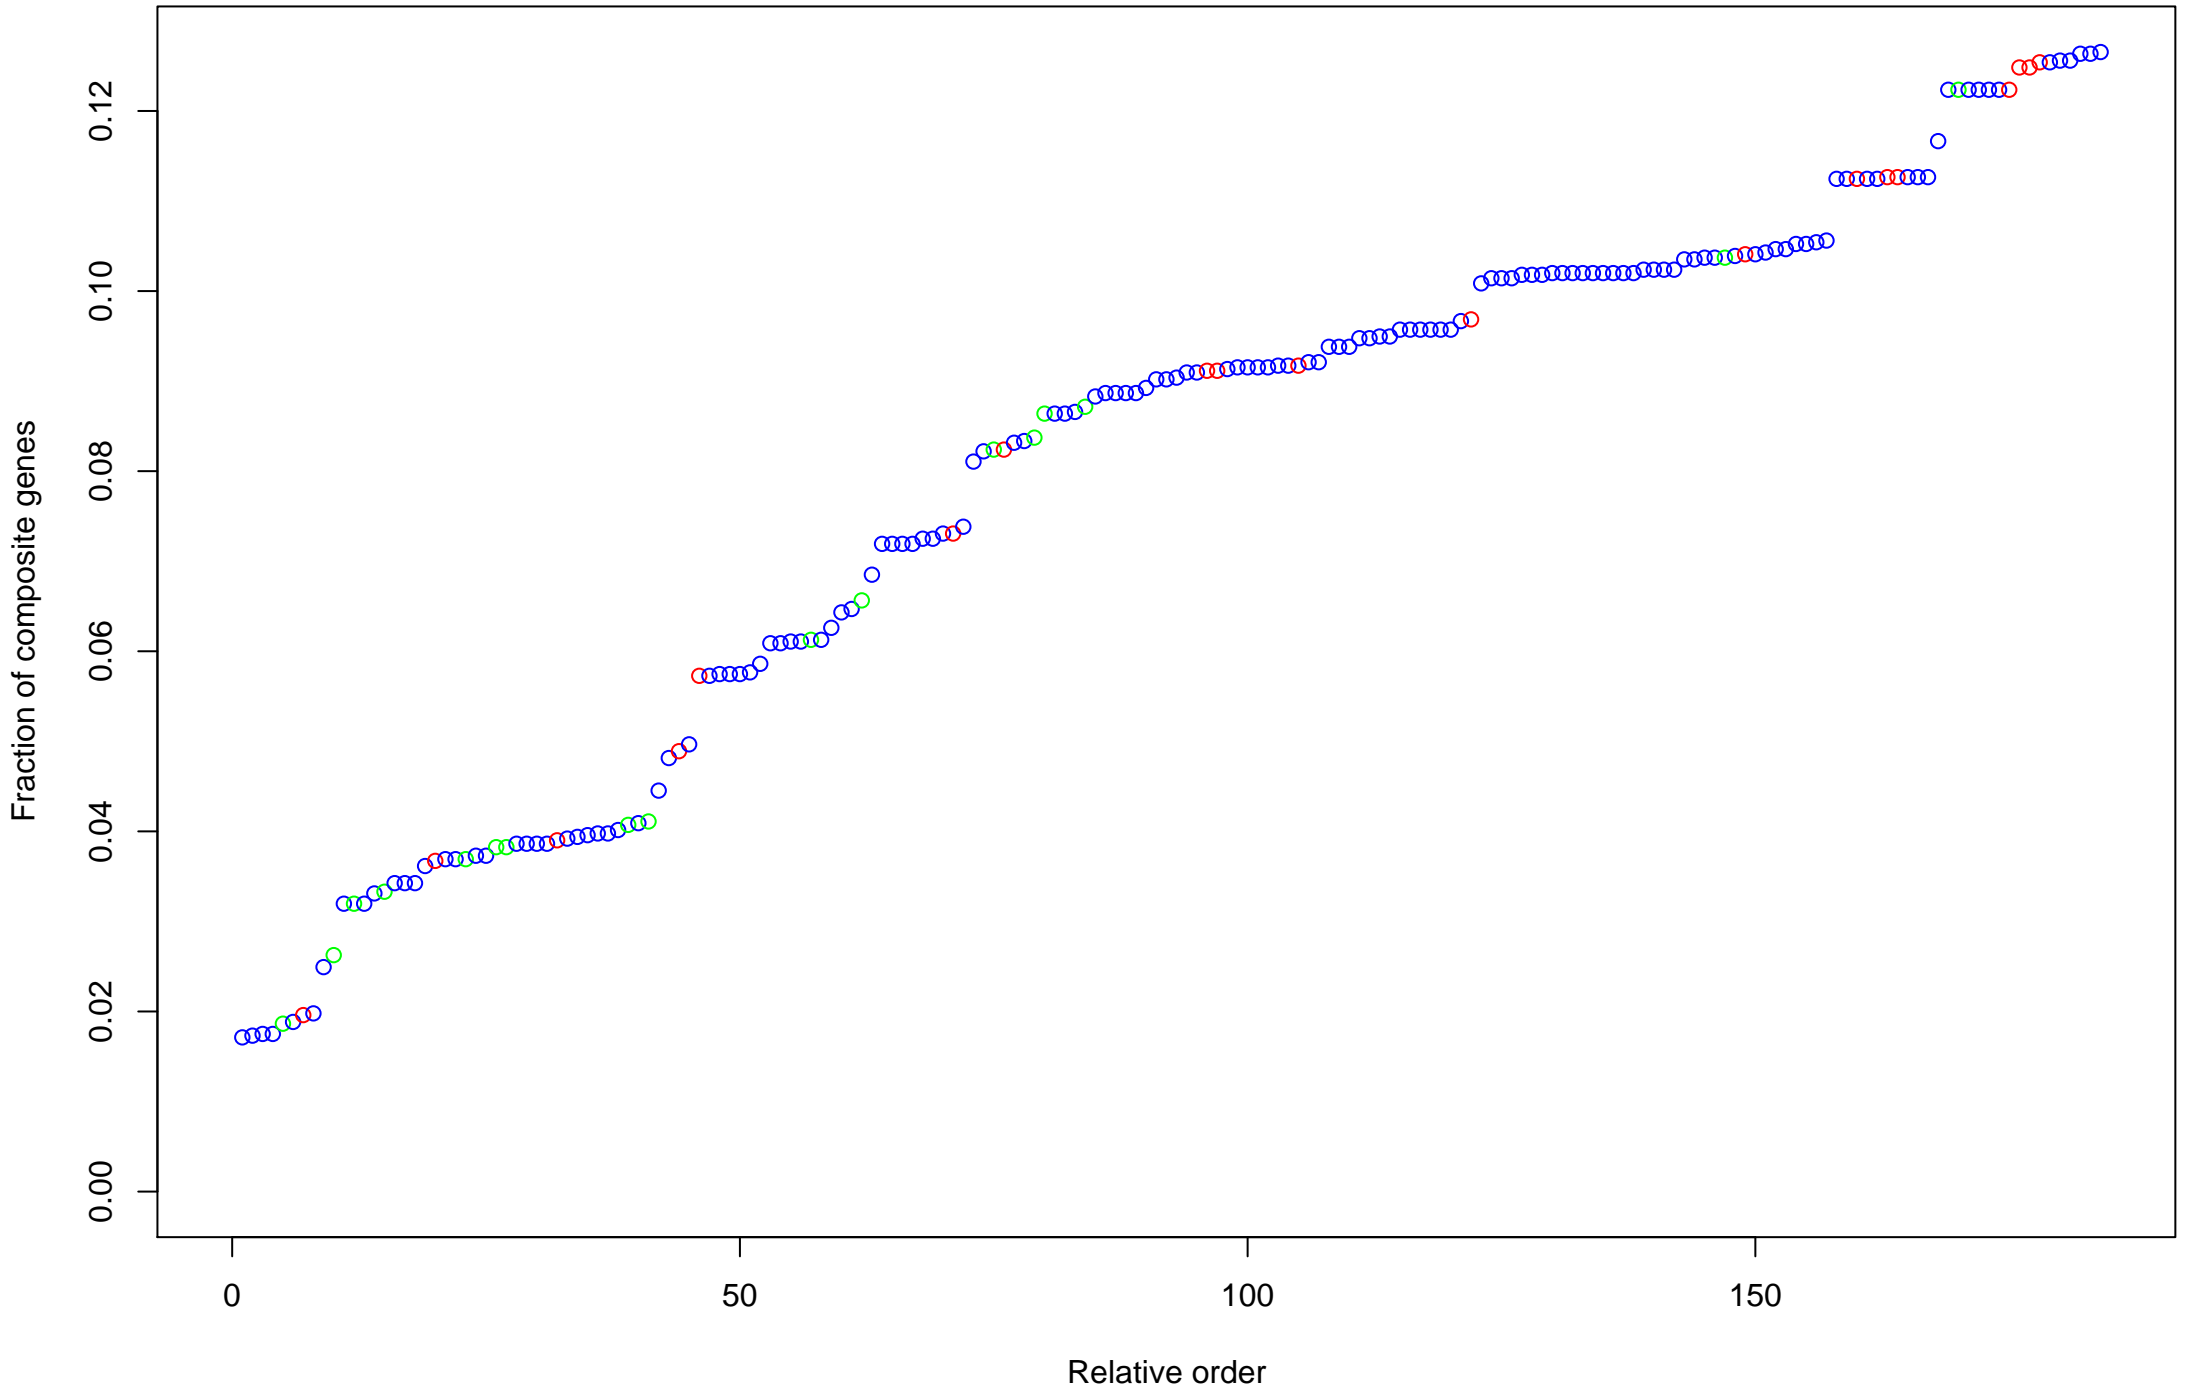

# NEUR-718-01 (*Nitrosomonas europaea*)

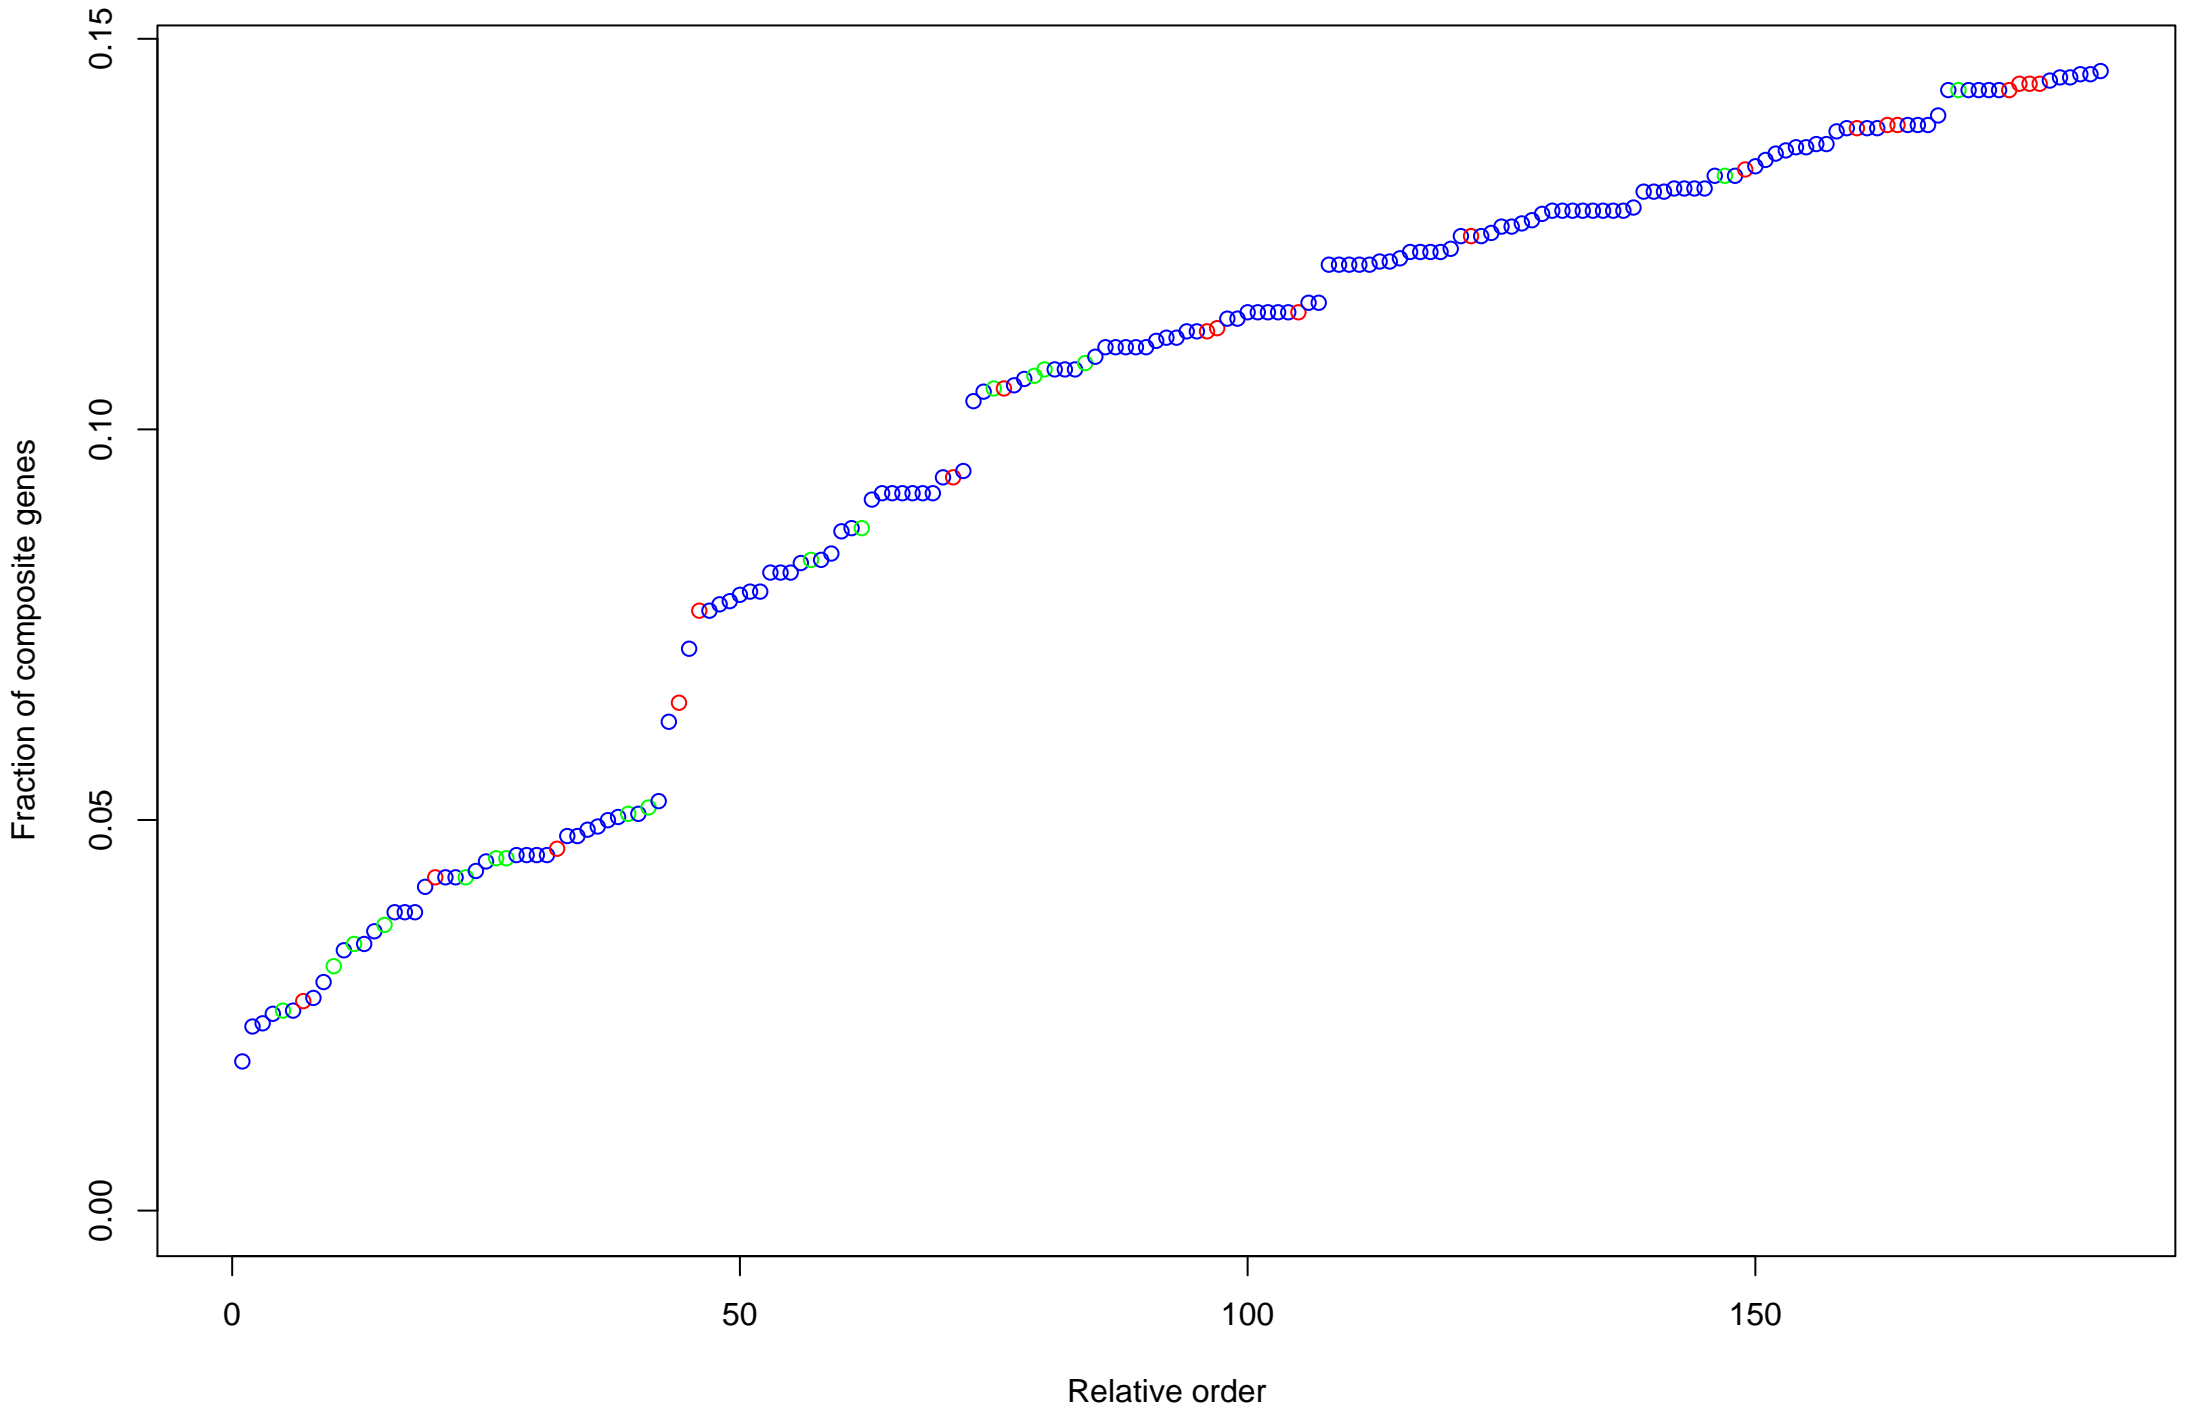

# SFLE-457-01 (*Shigella flexneri*)

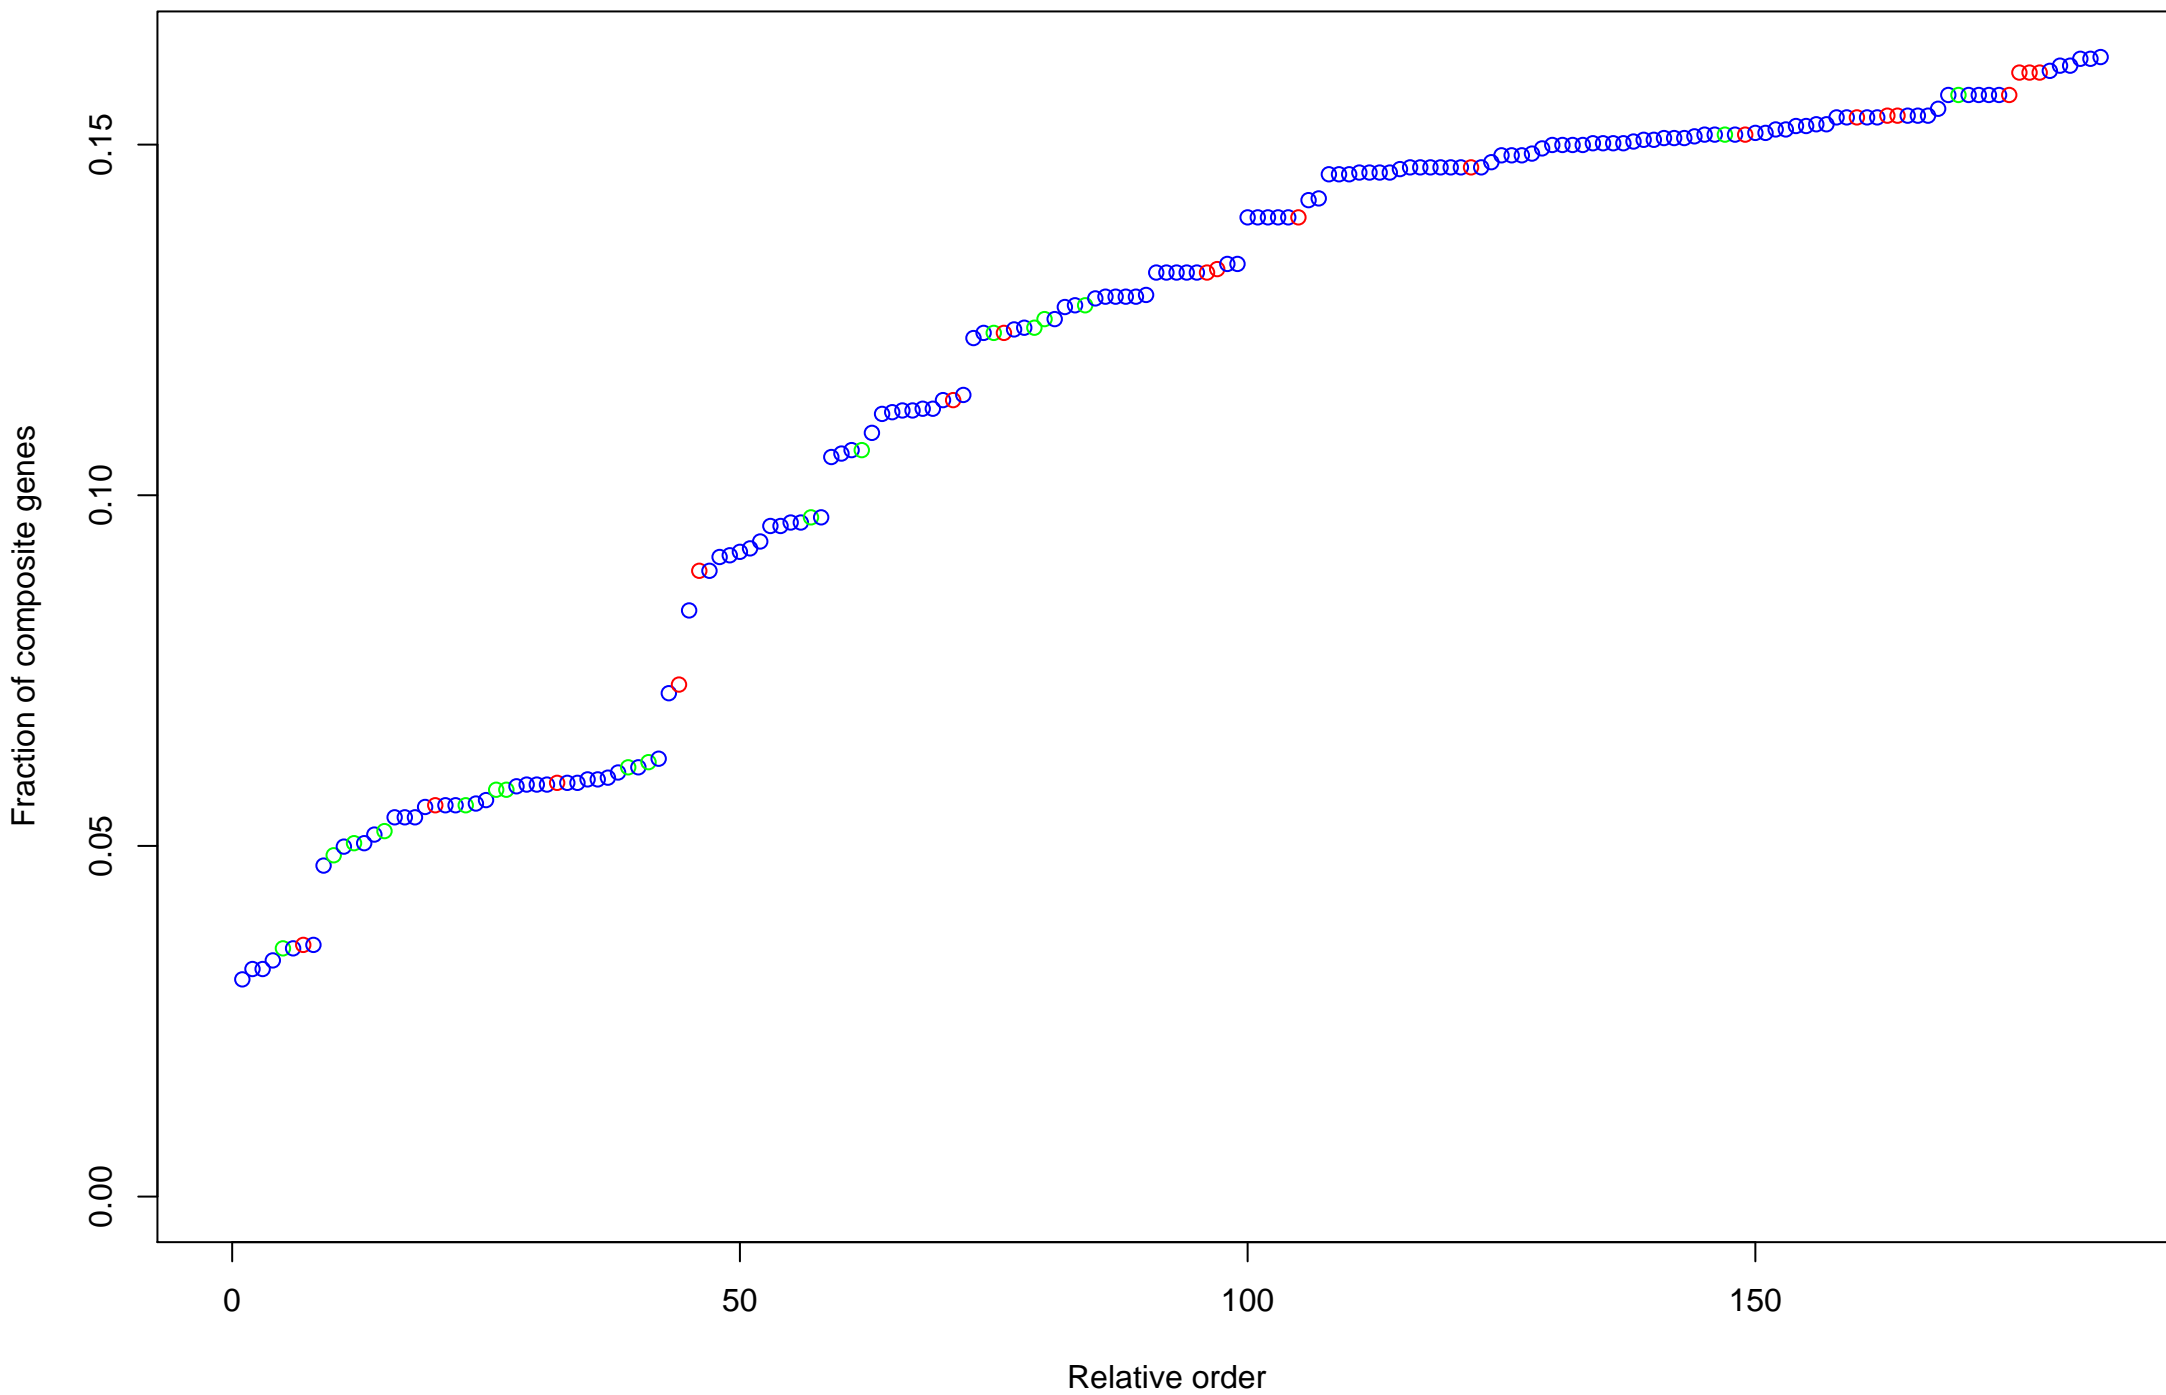

# SPYO-SSI-01 (Streptococcus pyogenes M3)

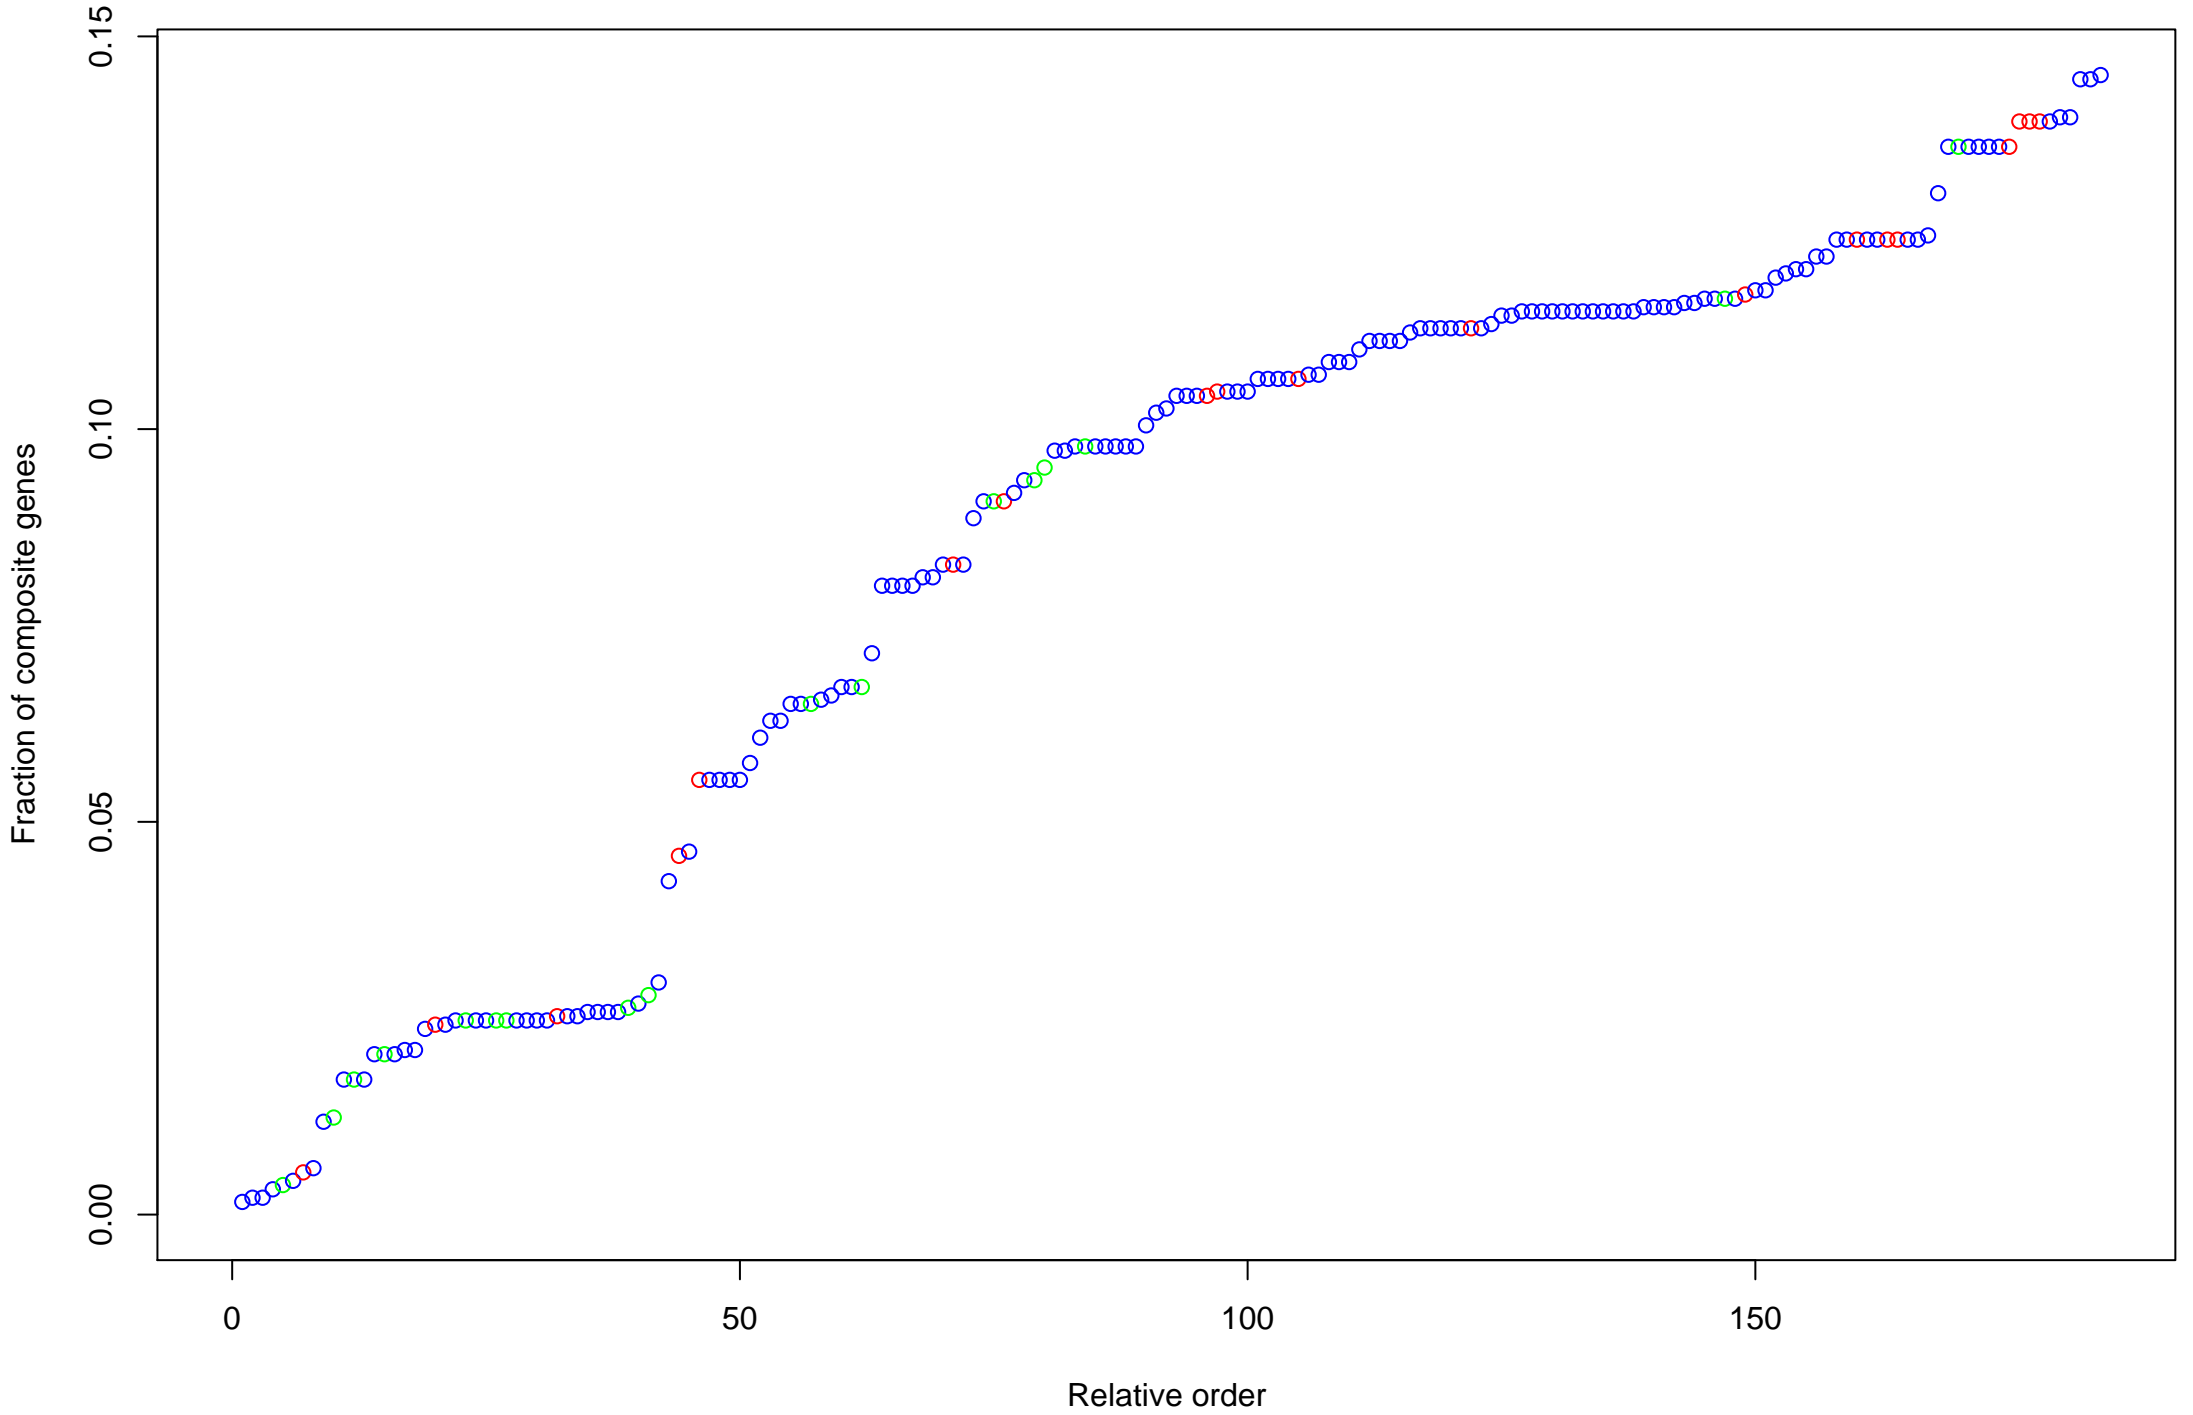

# MBOV-AF2-01 (*Mycobacterium bovis*)

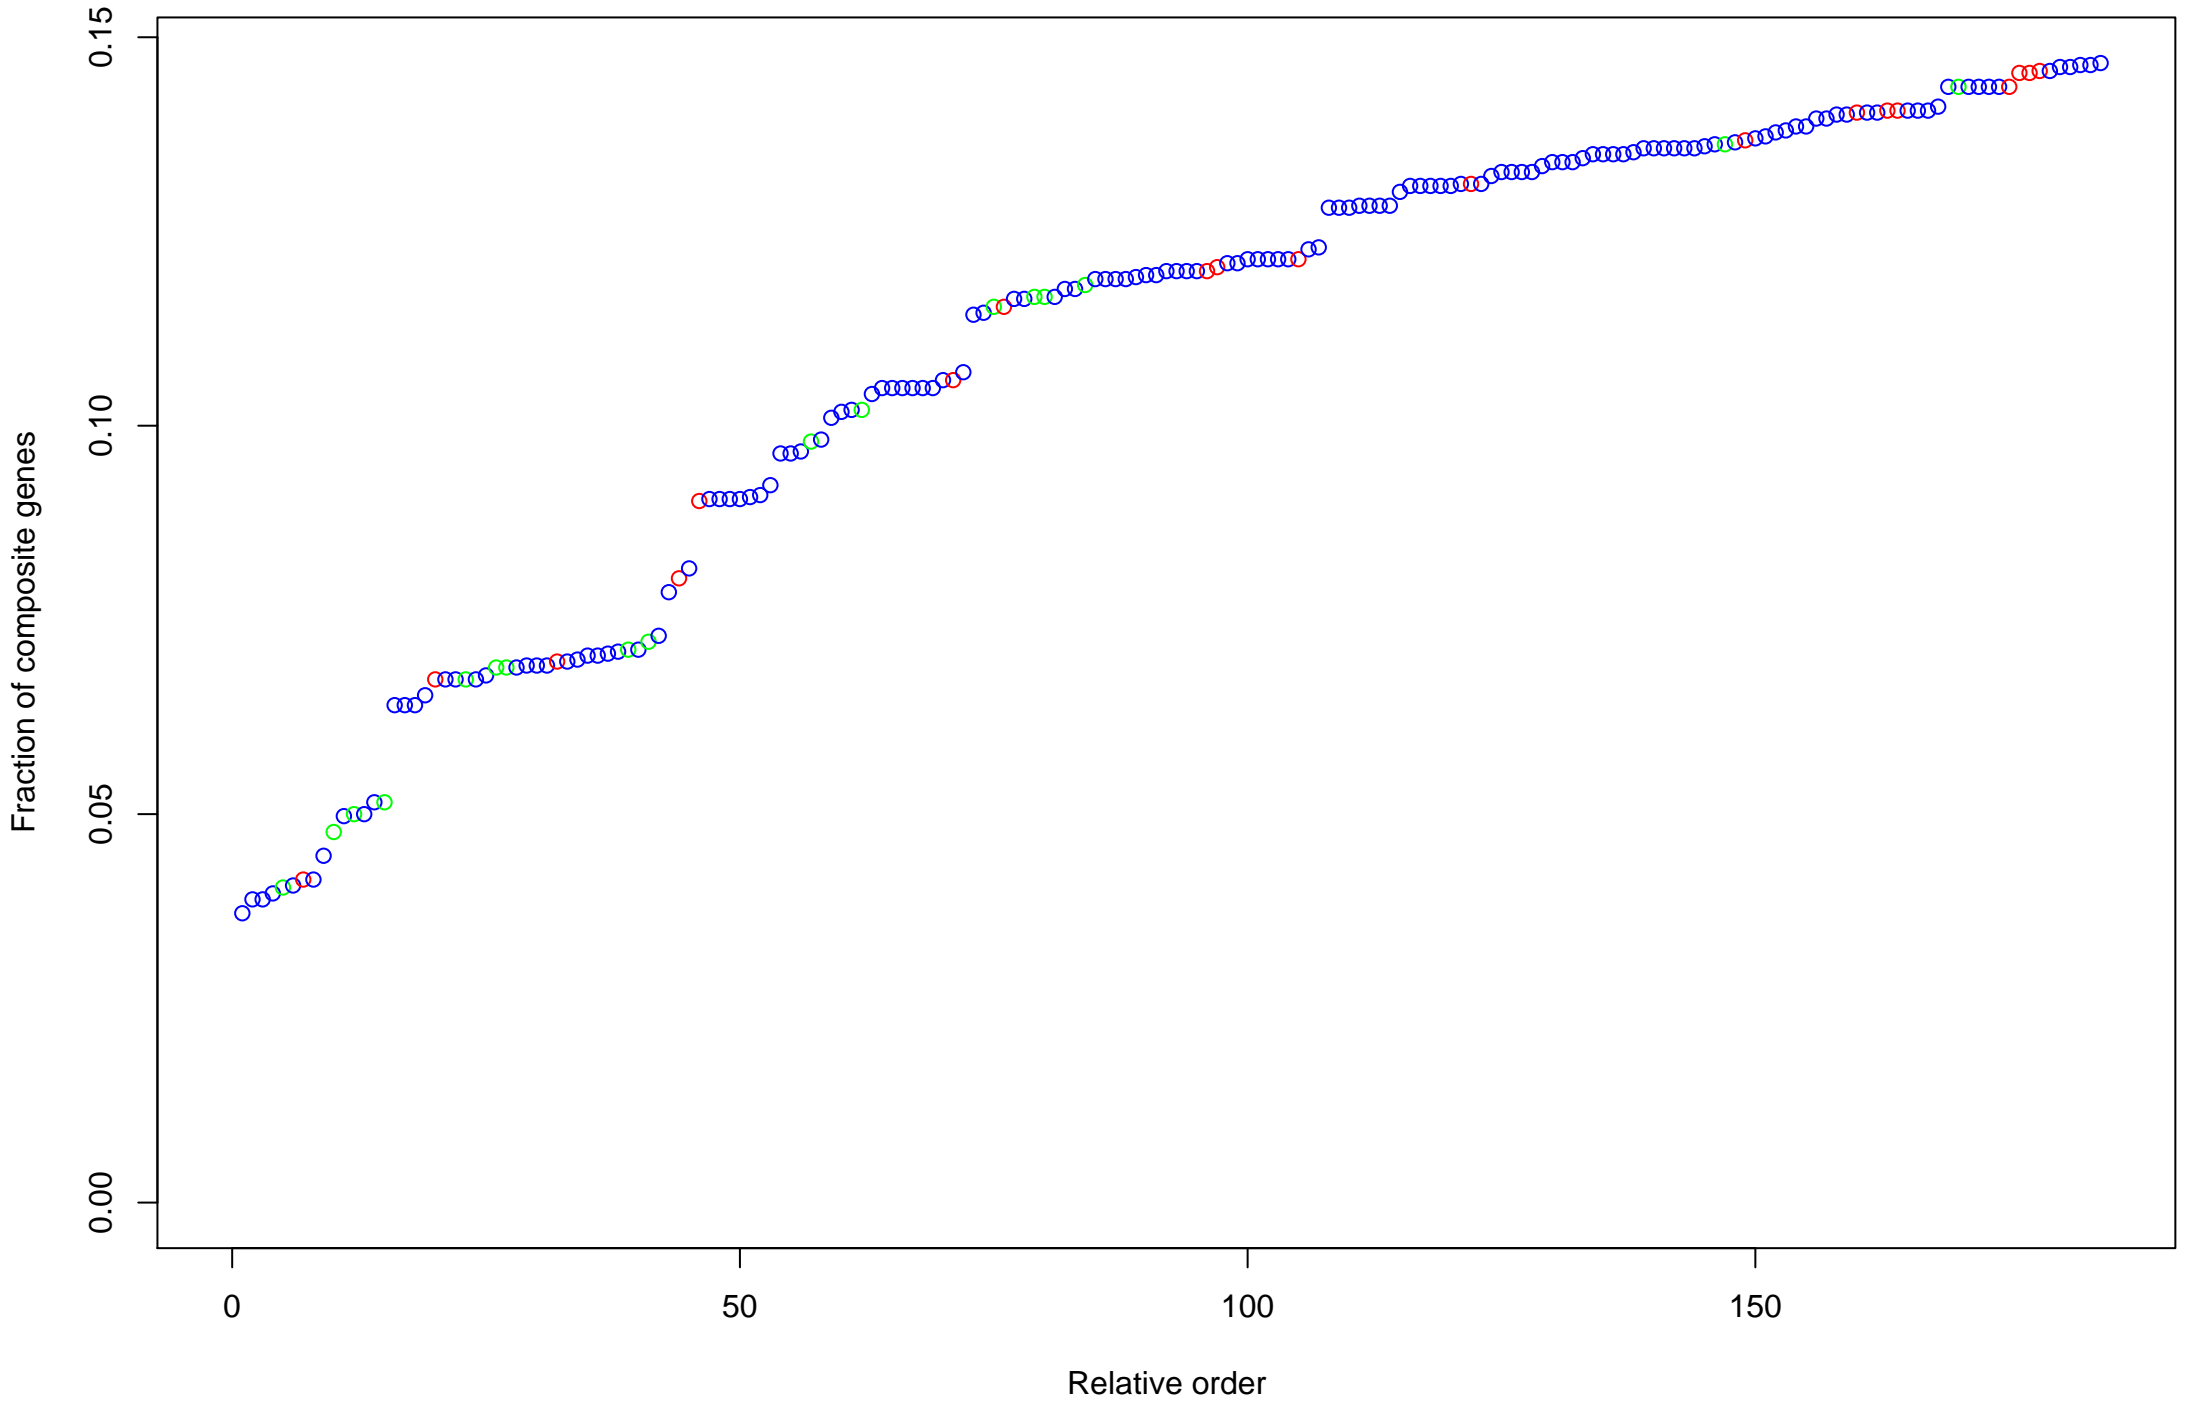

# HHEP-449-01 (*Helicobacter hepaticus*)

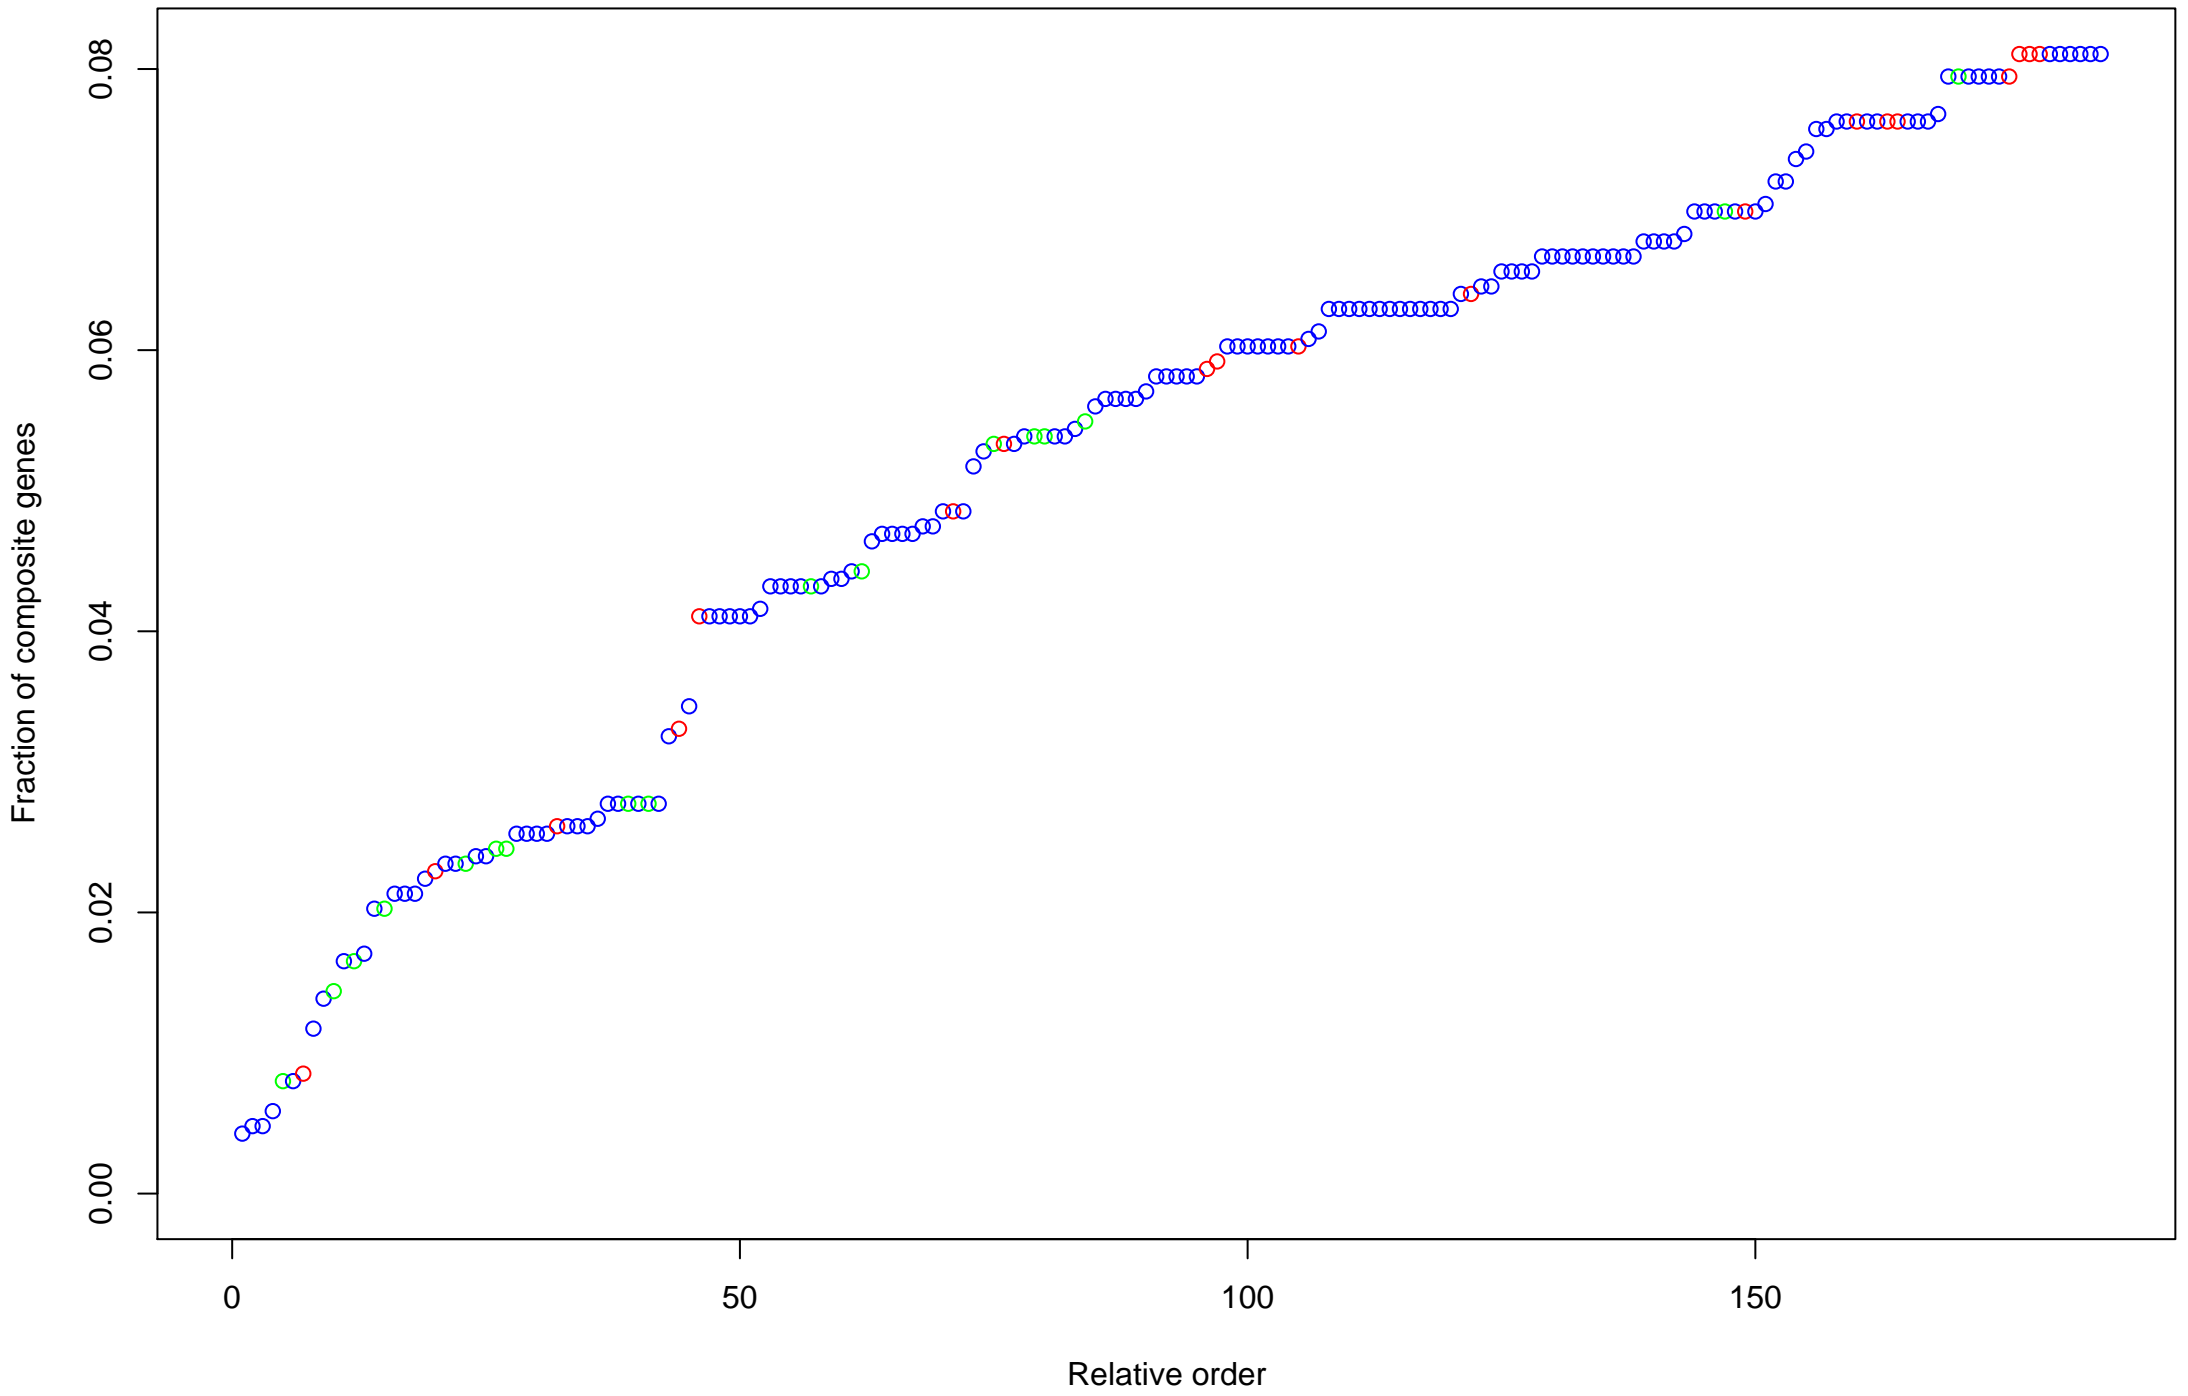



# PIRE-ST1-01 (Pirellula sp.)

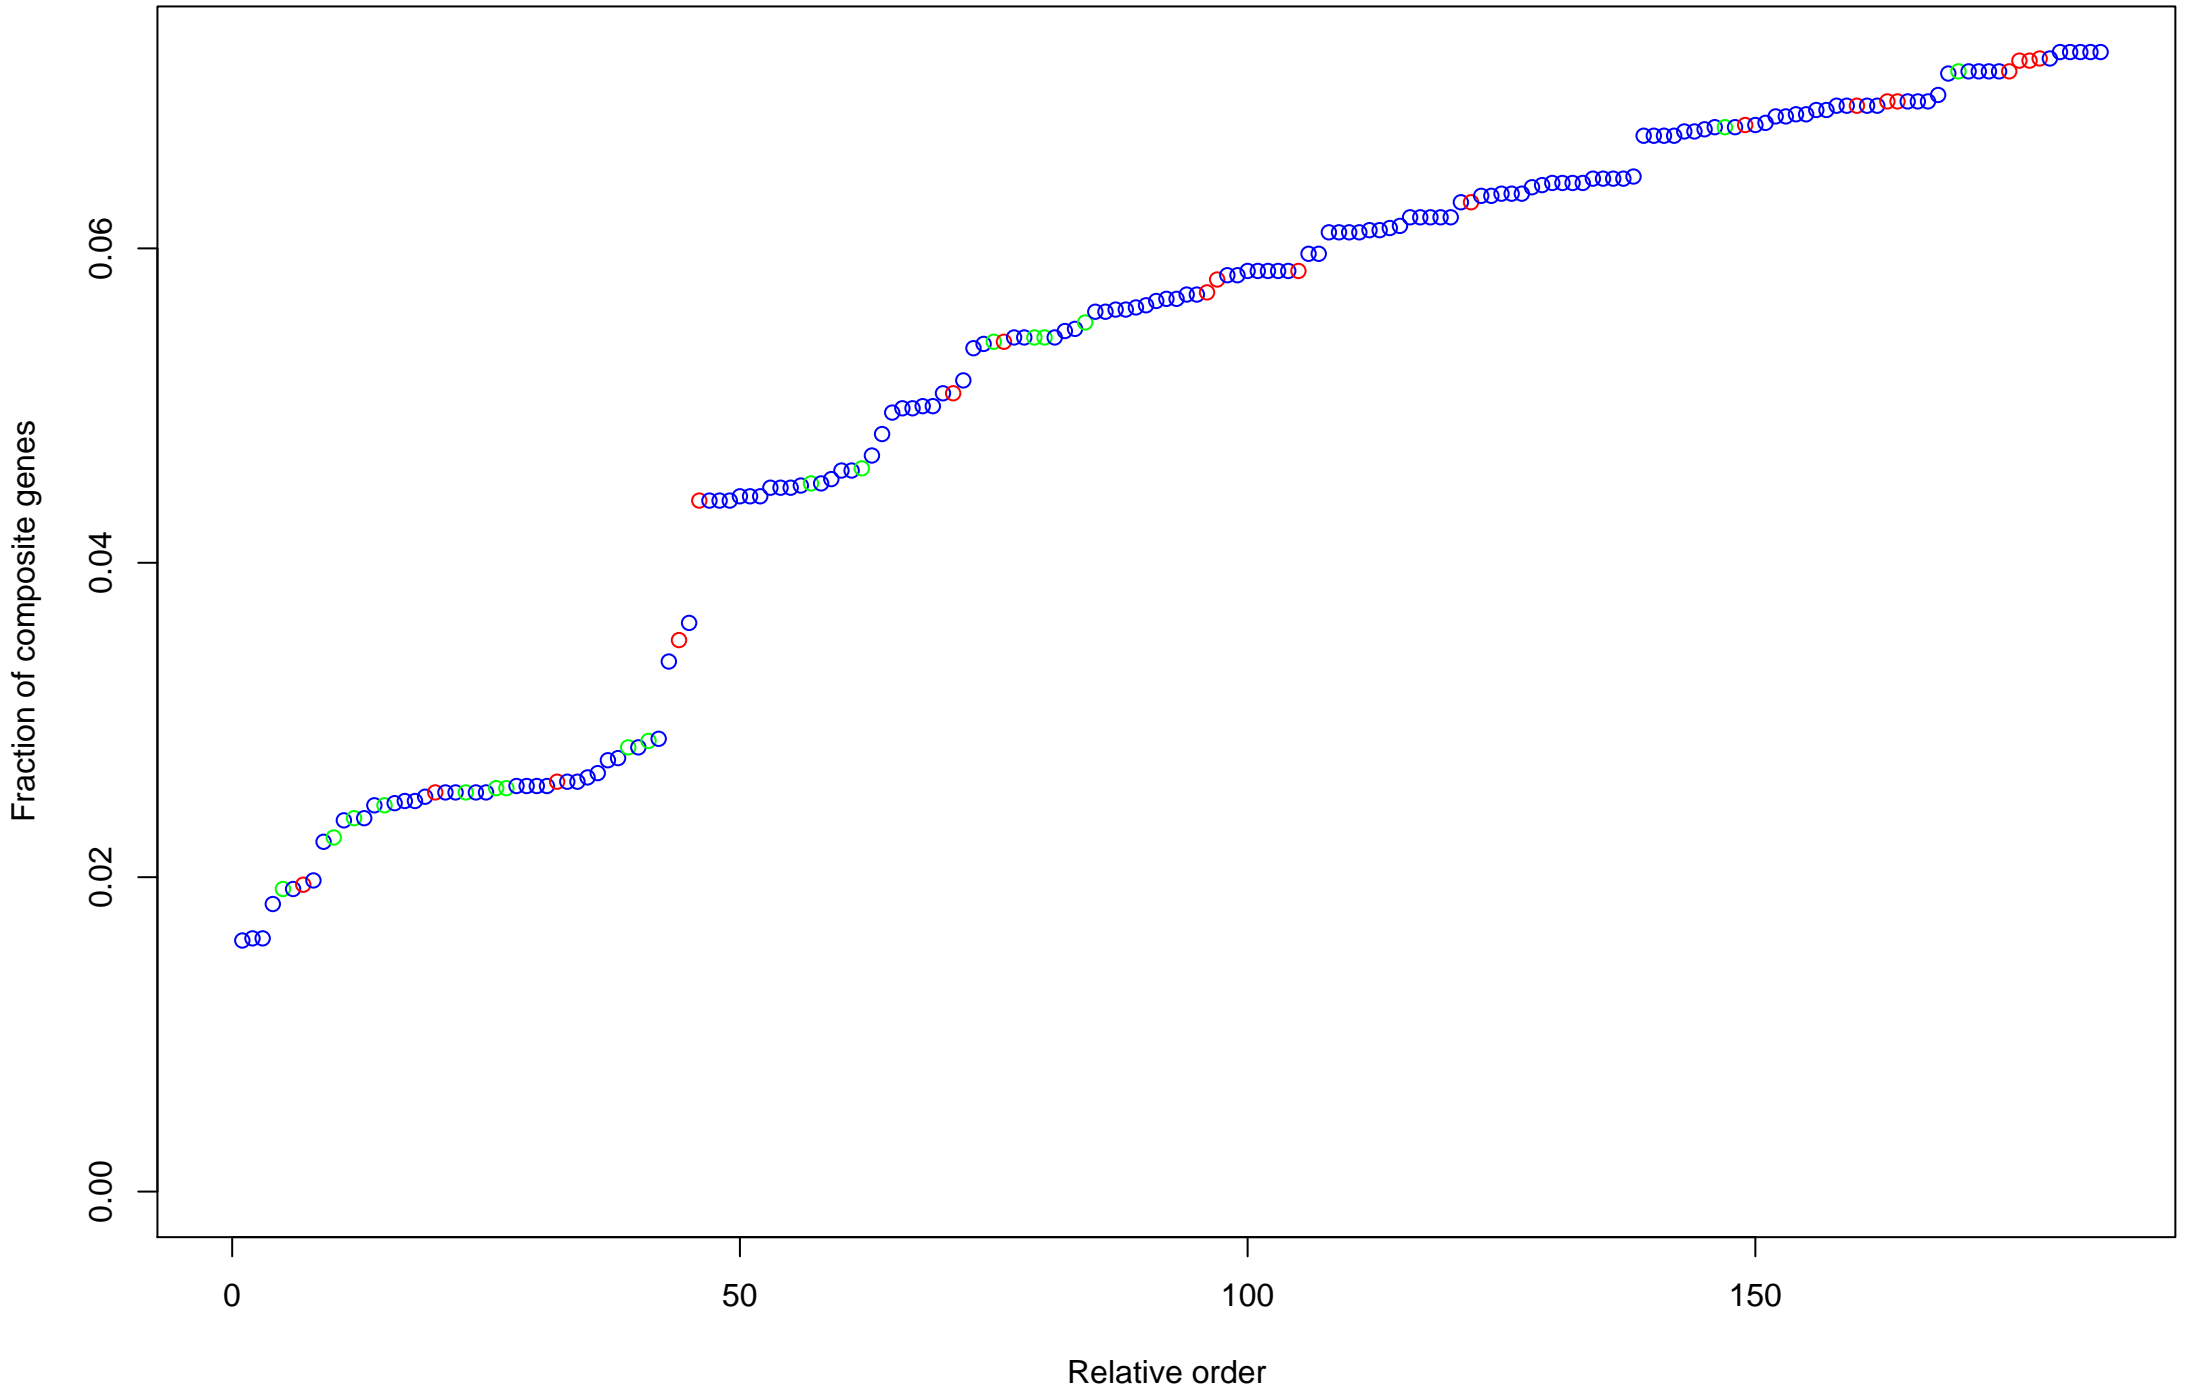

# CEFF-YS3-01 (*Corynebacterium efficiens*)

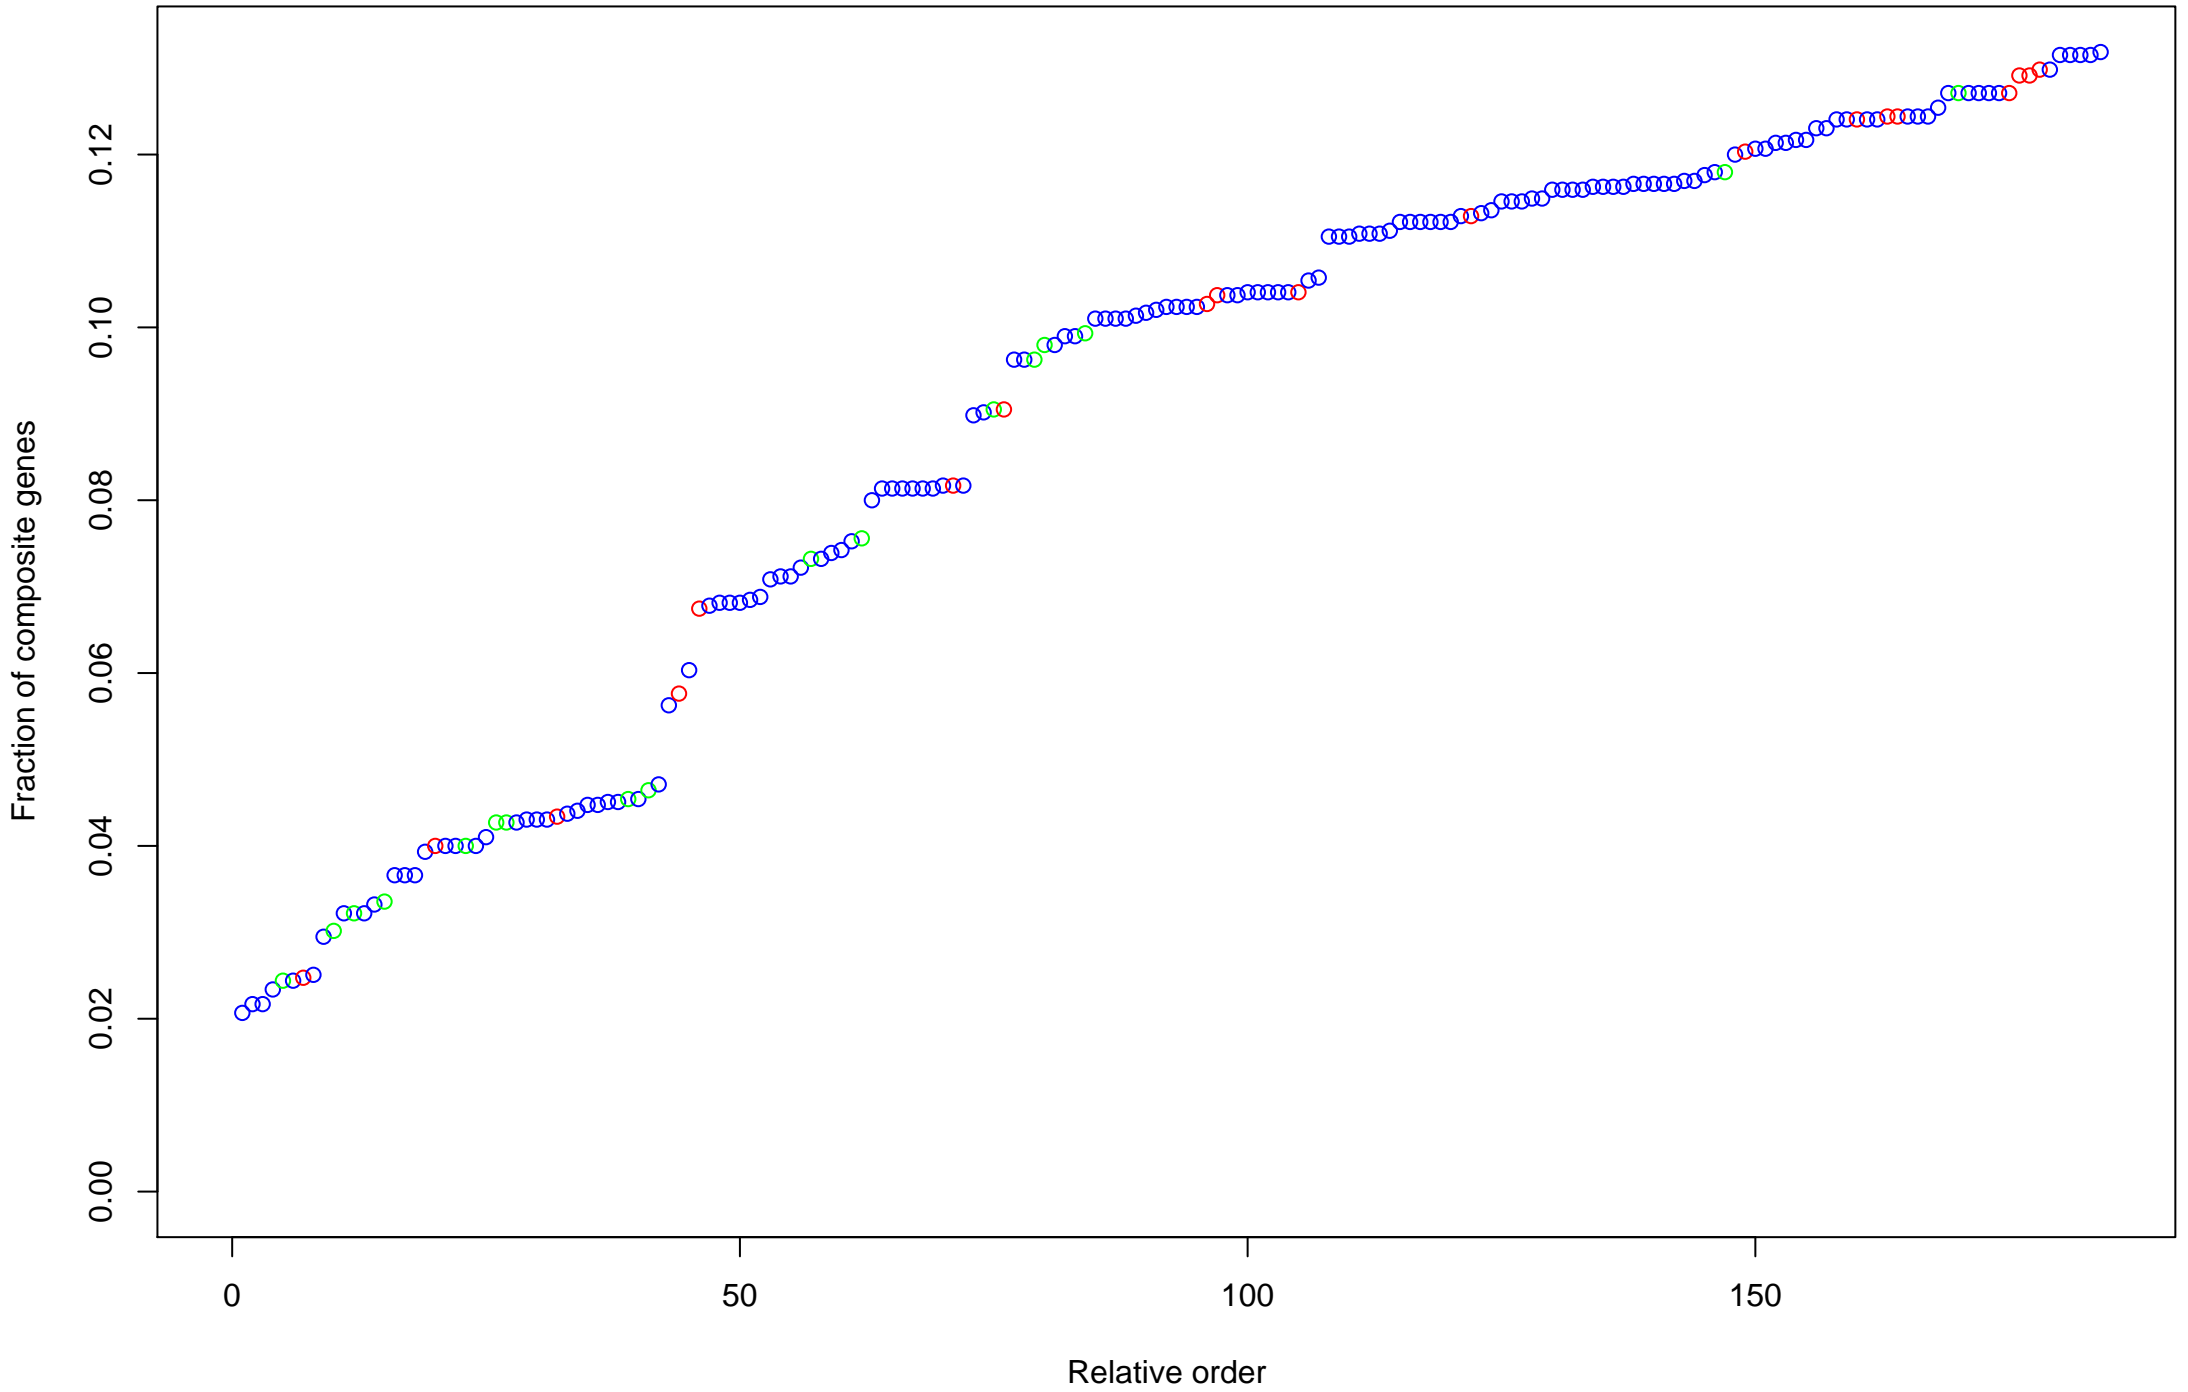

# BFLO-XXX-01 (*Blochmannia floridanus*)

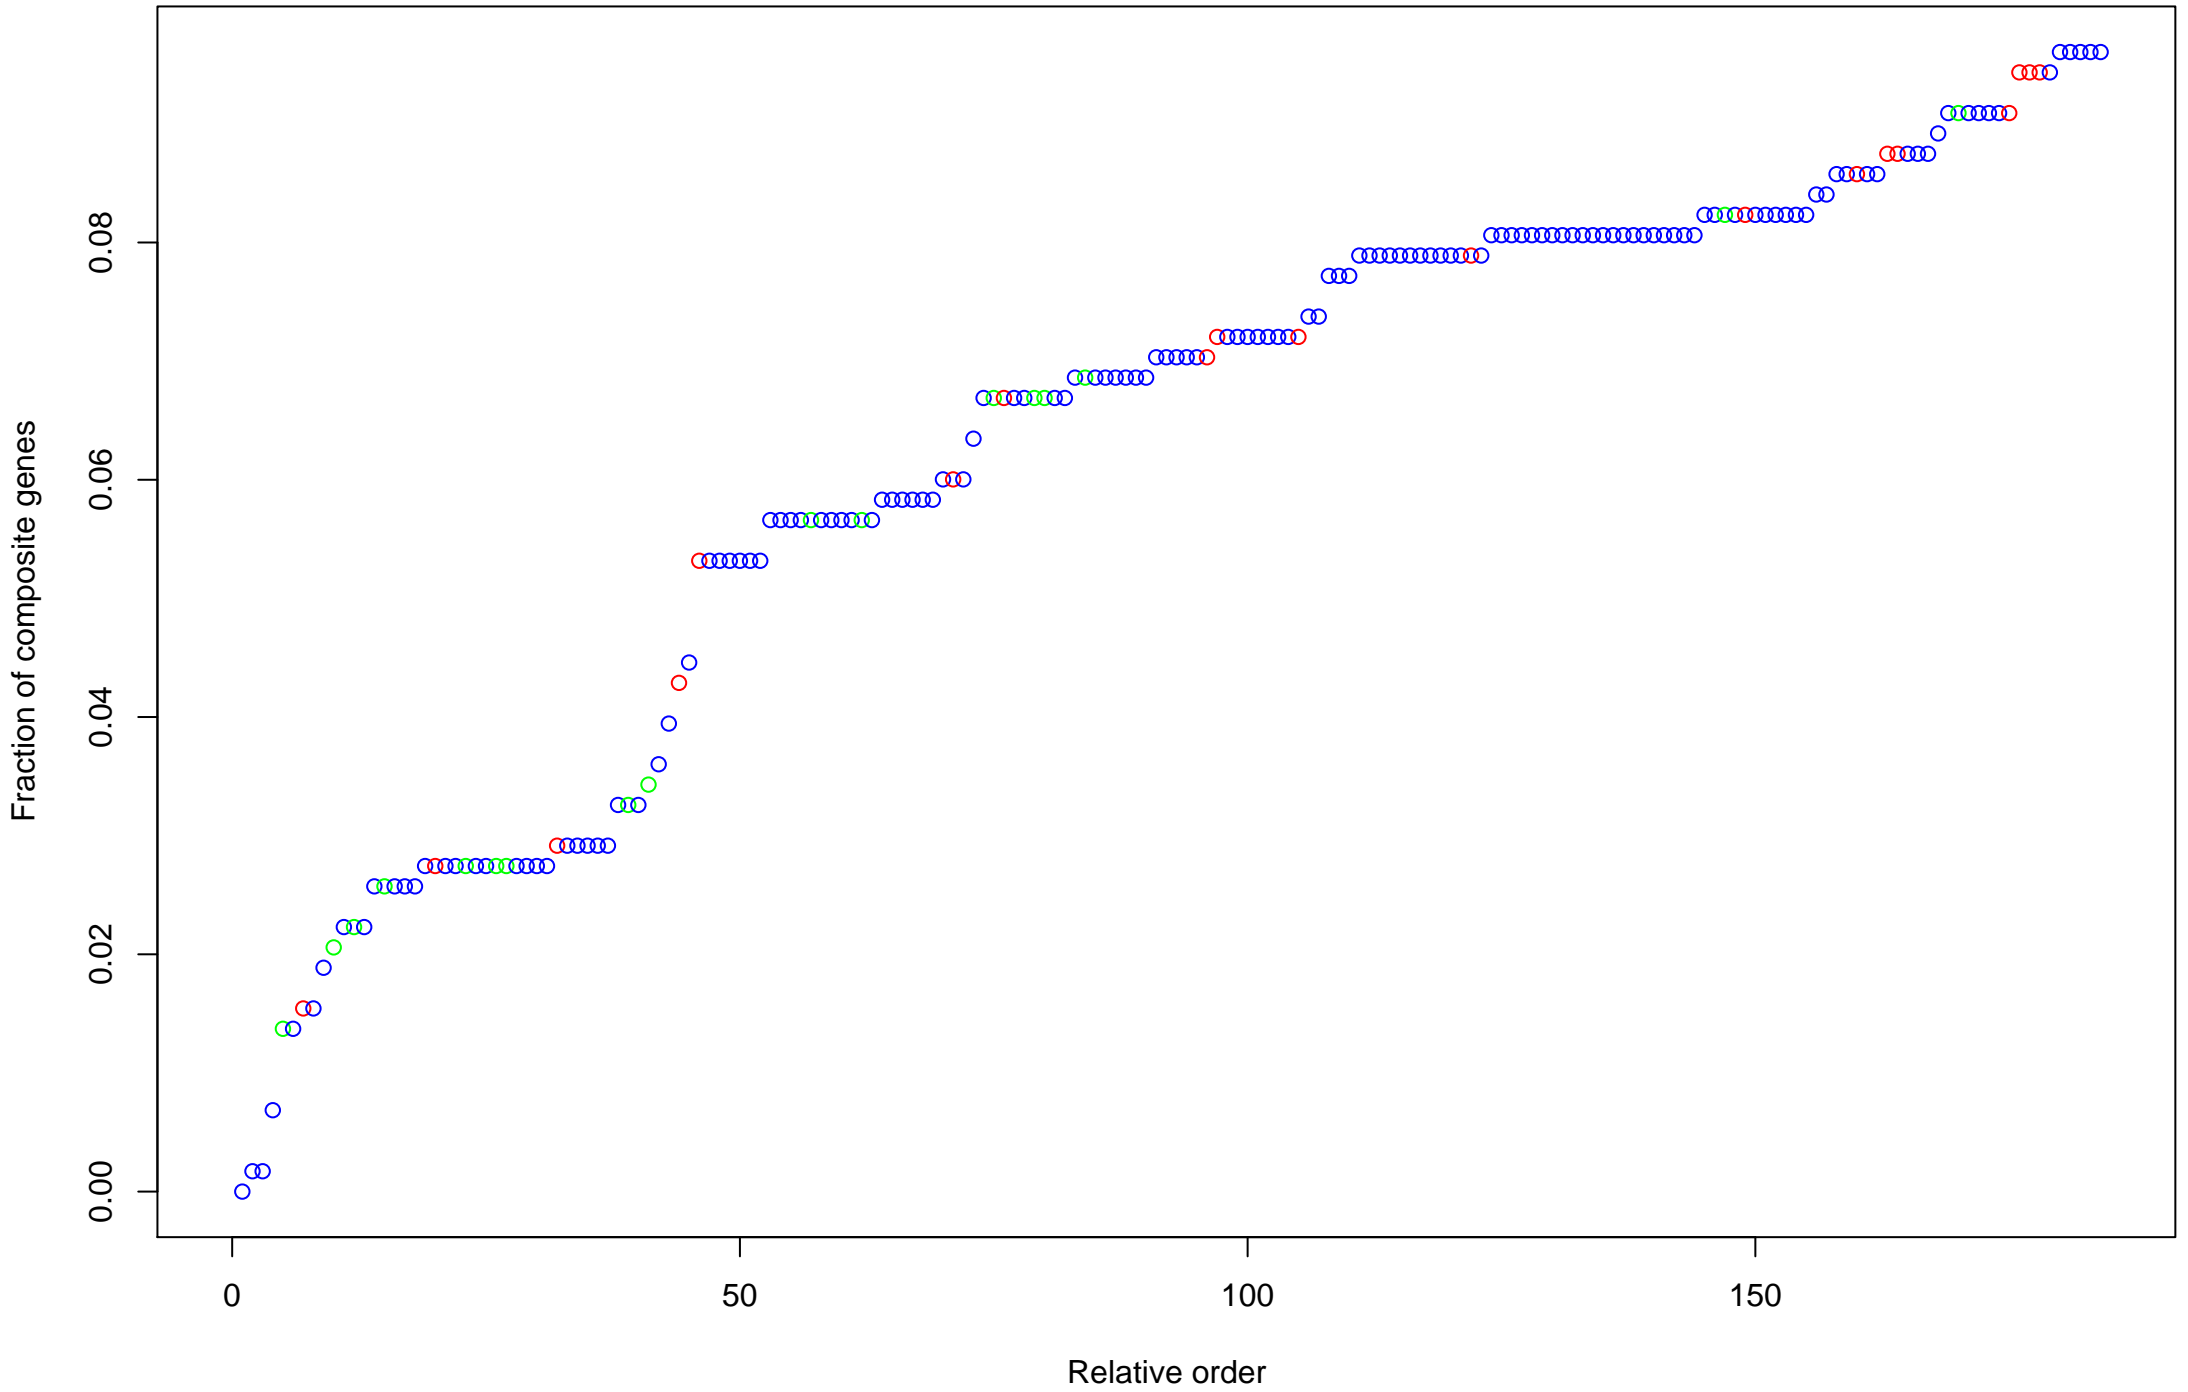

# TWHI-TWI-01 (*Tropheryma whipplei*)

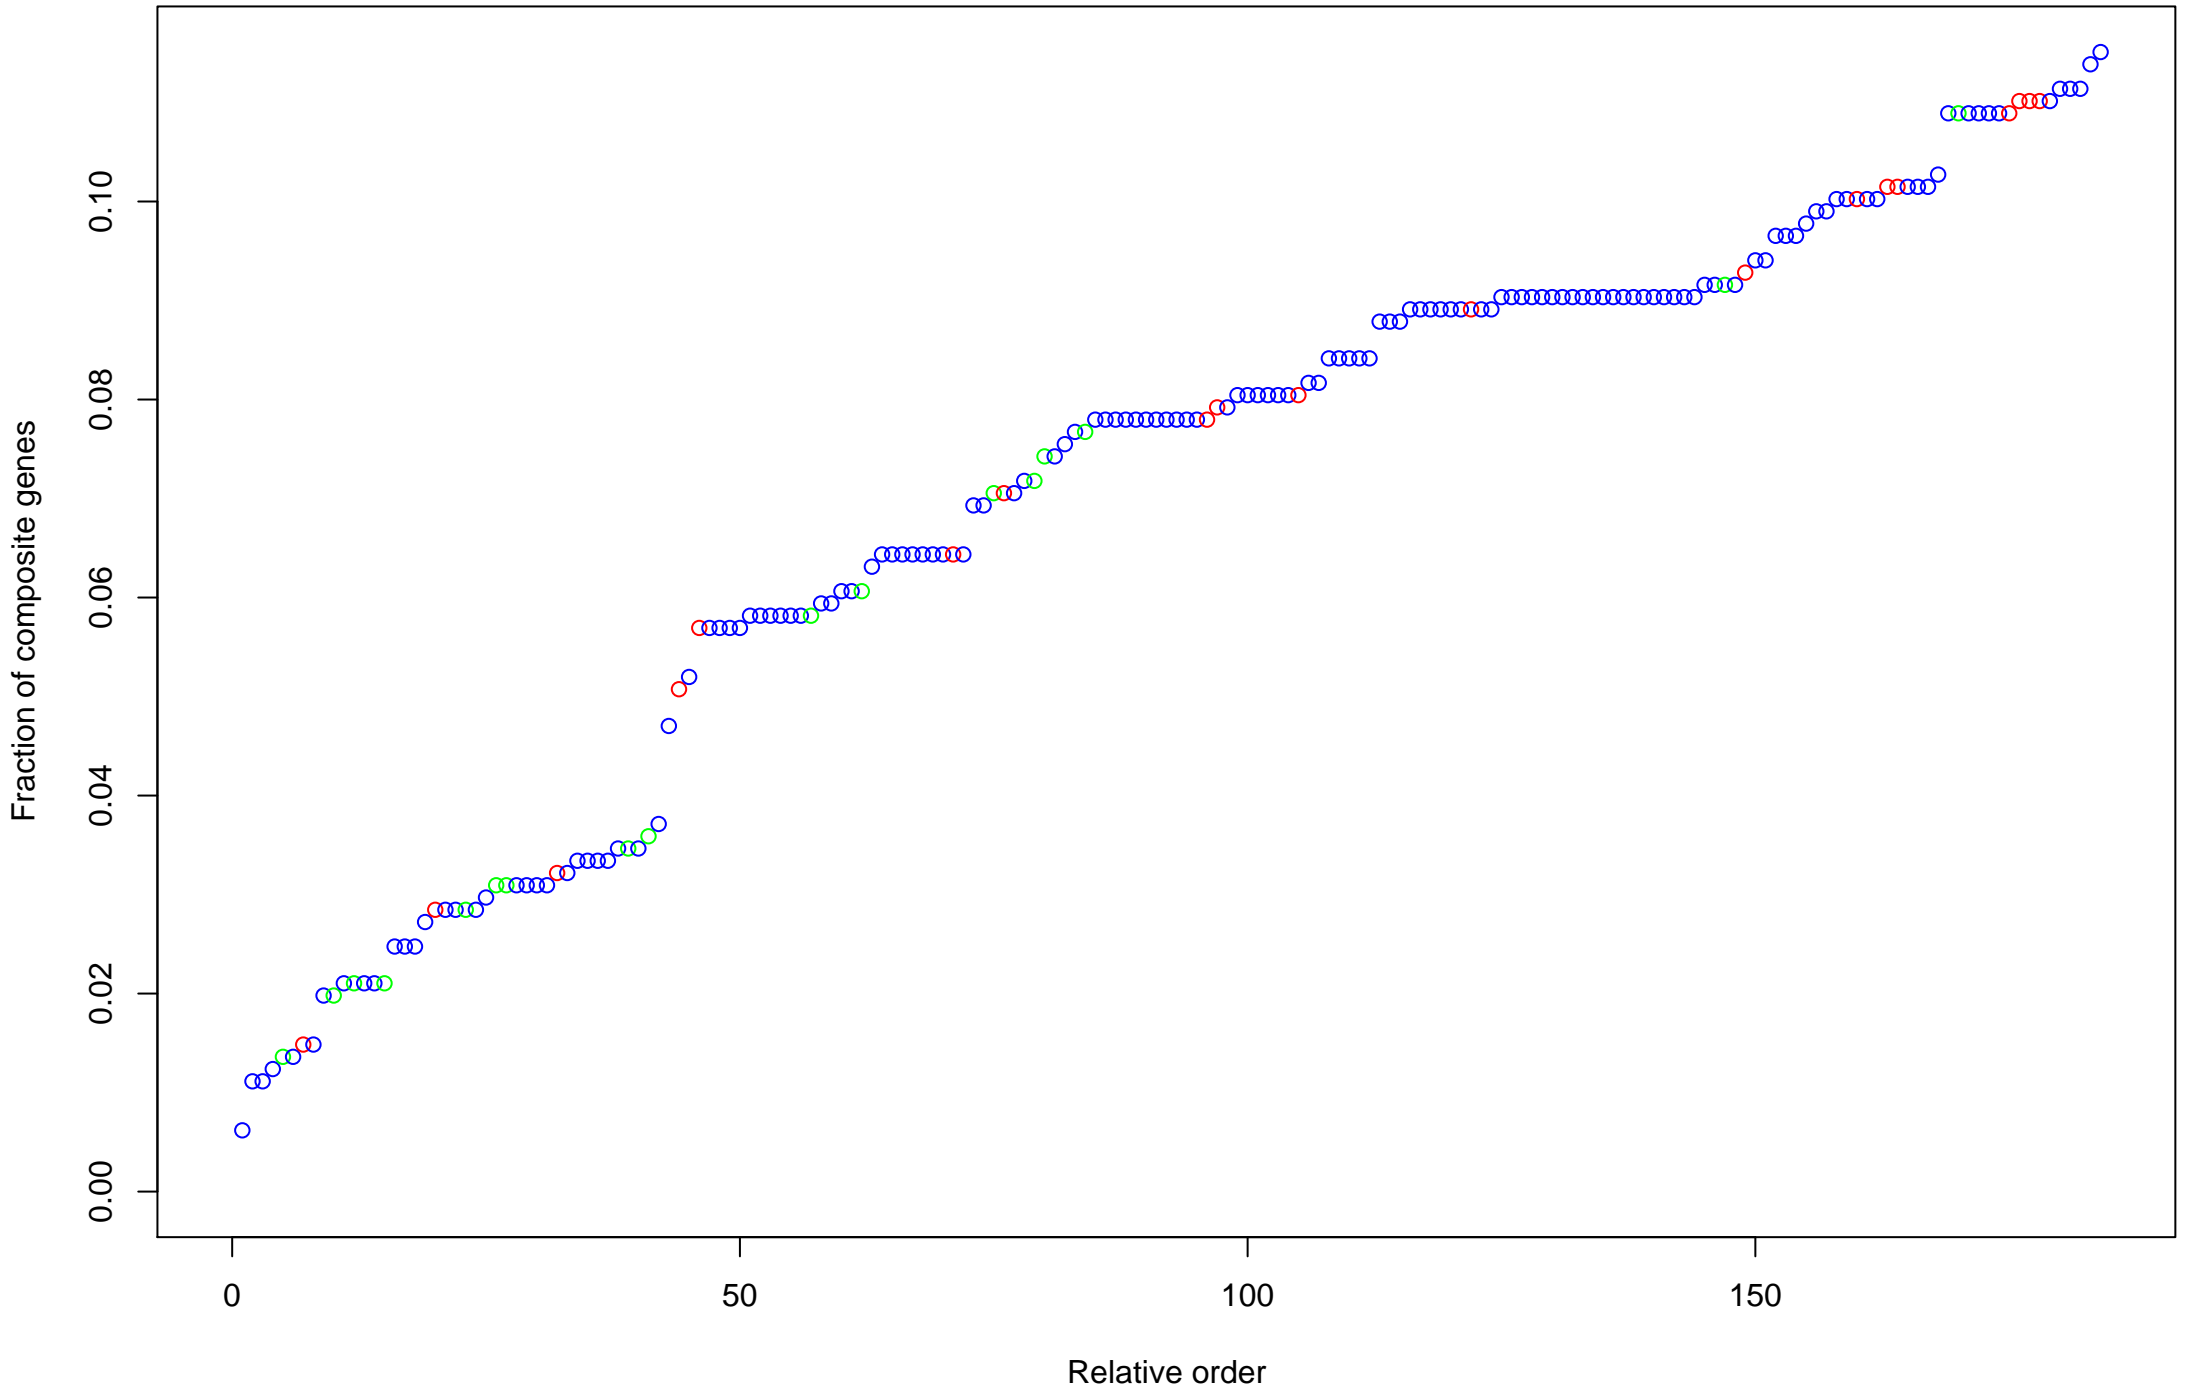

# BBRO-252-01 (*Bordetella bronchiseptica*)

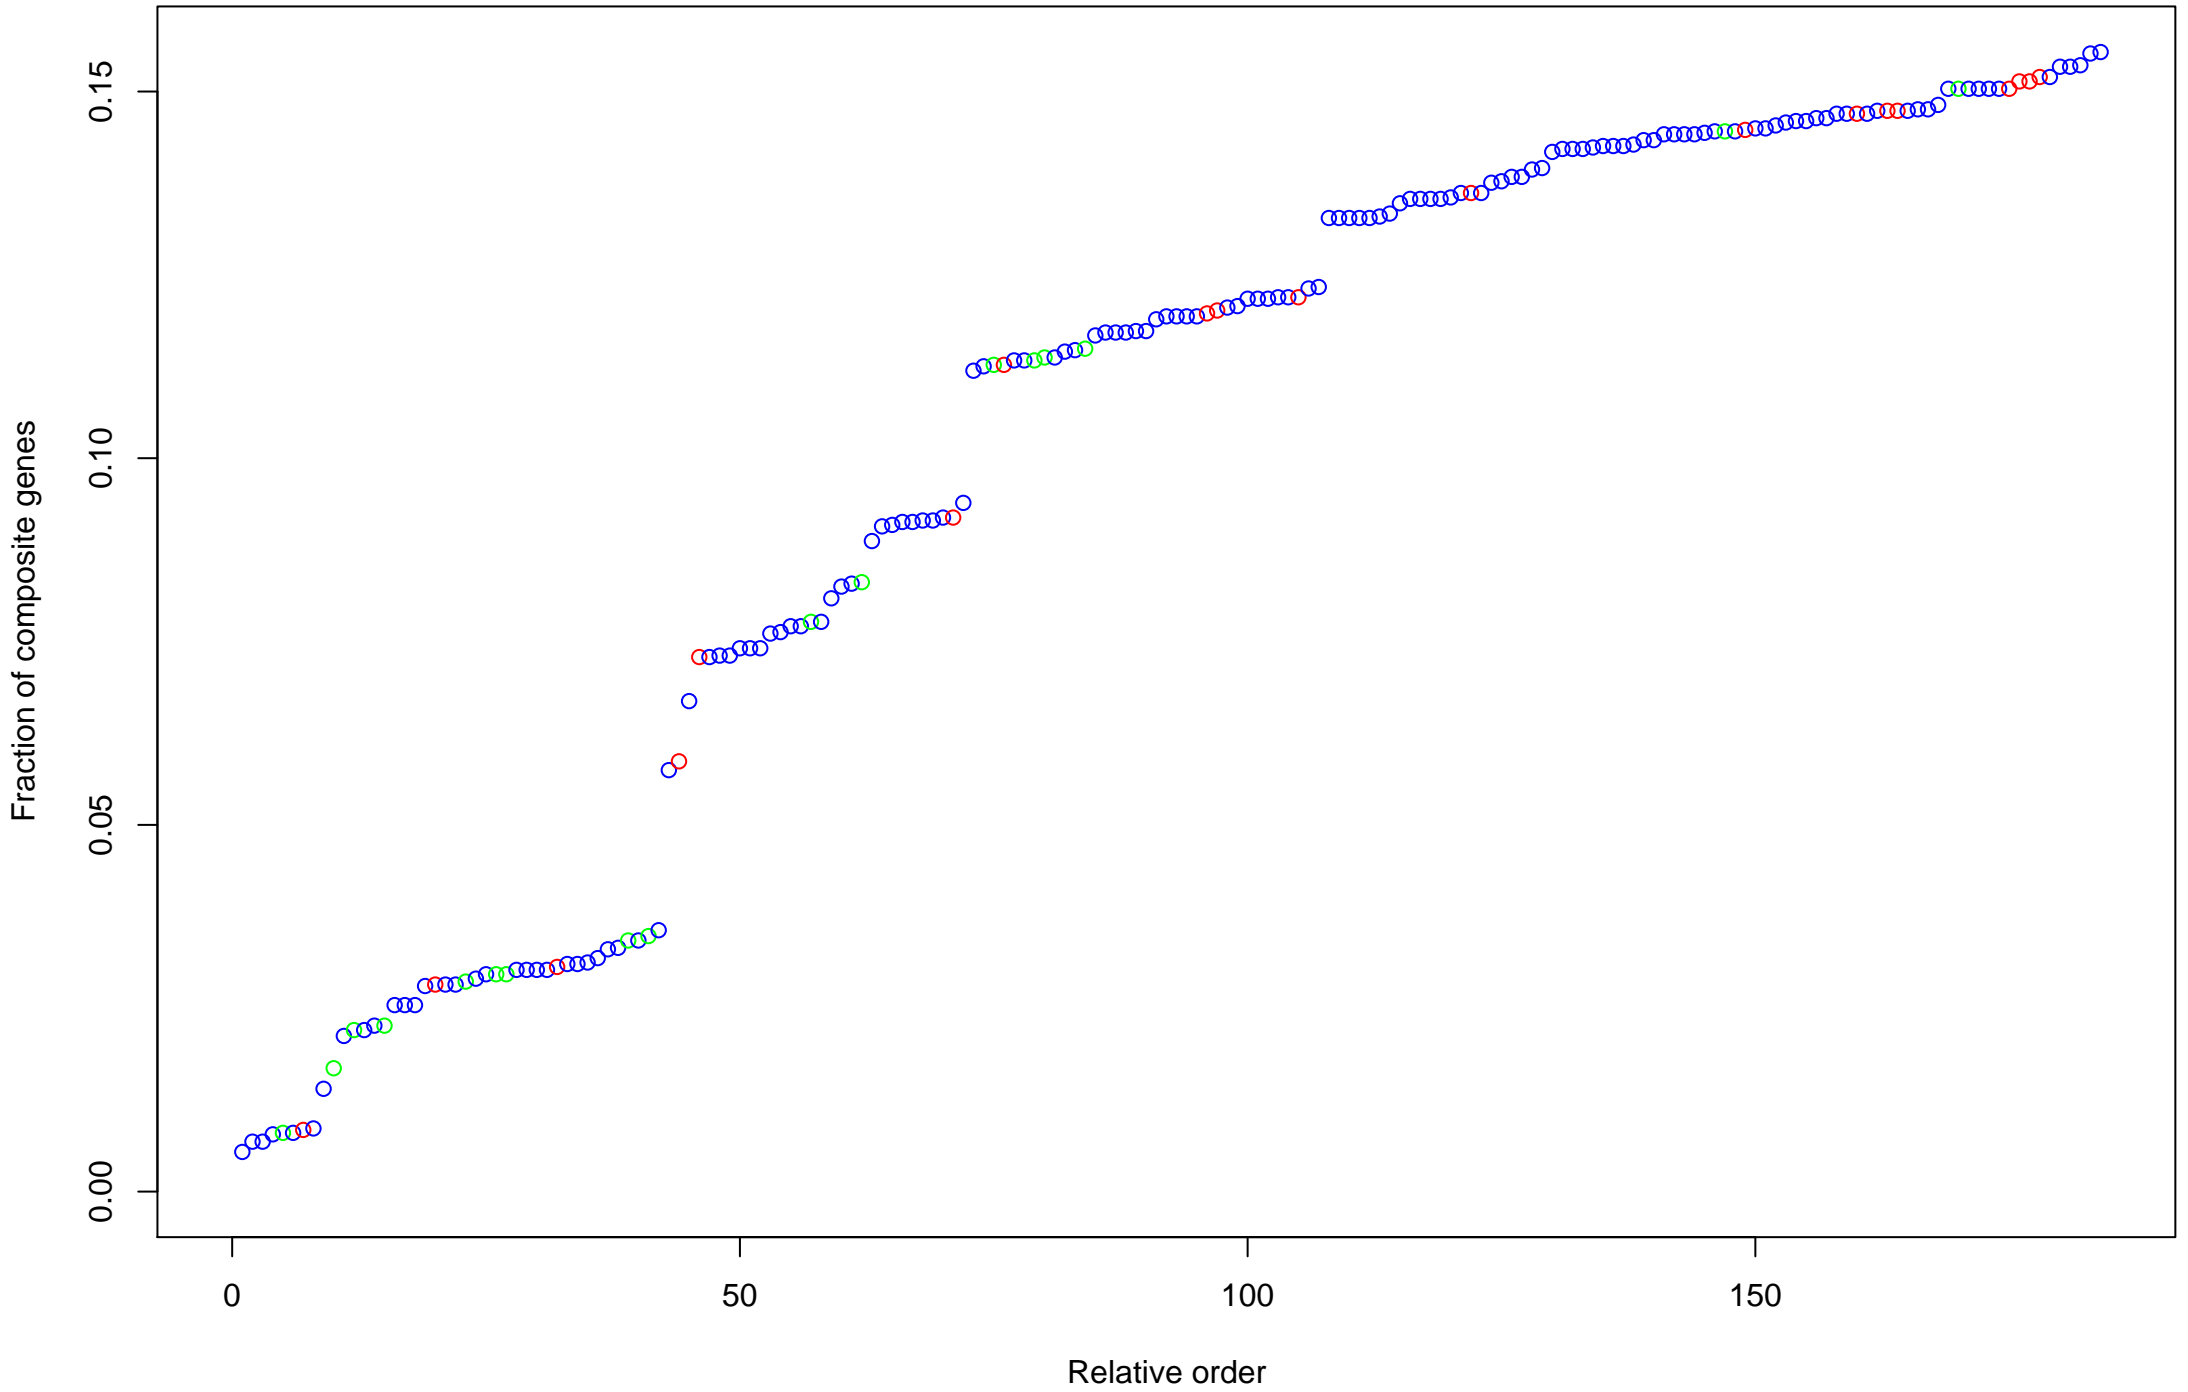

# BPAR-253-01 (*Bordetella parapertussis*)

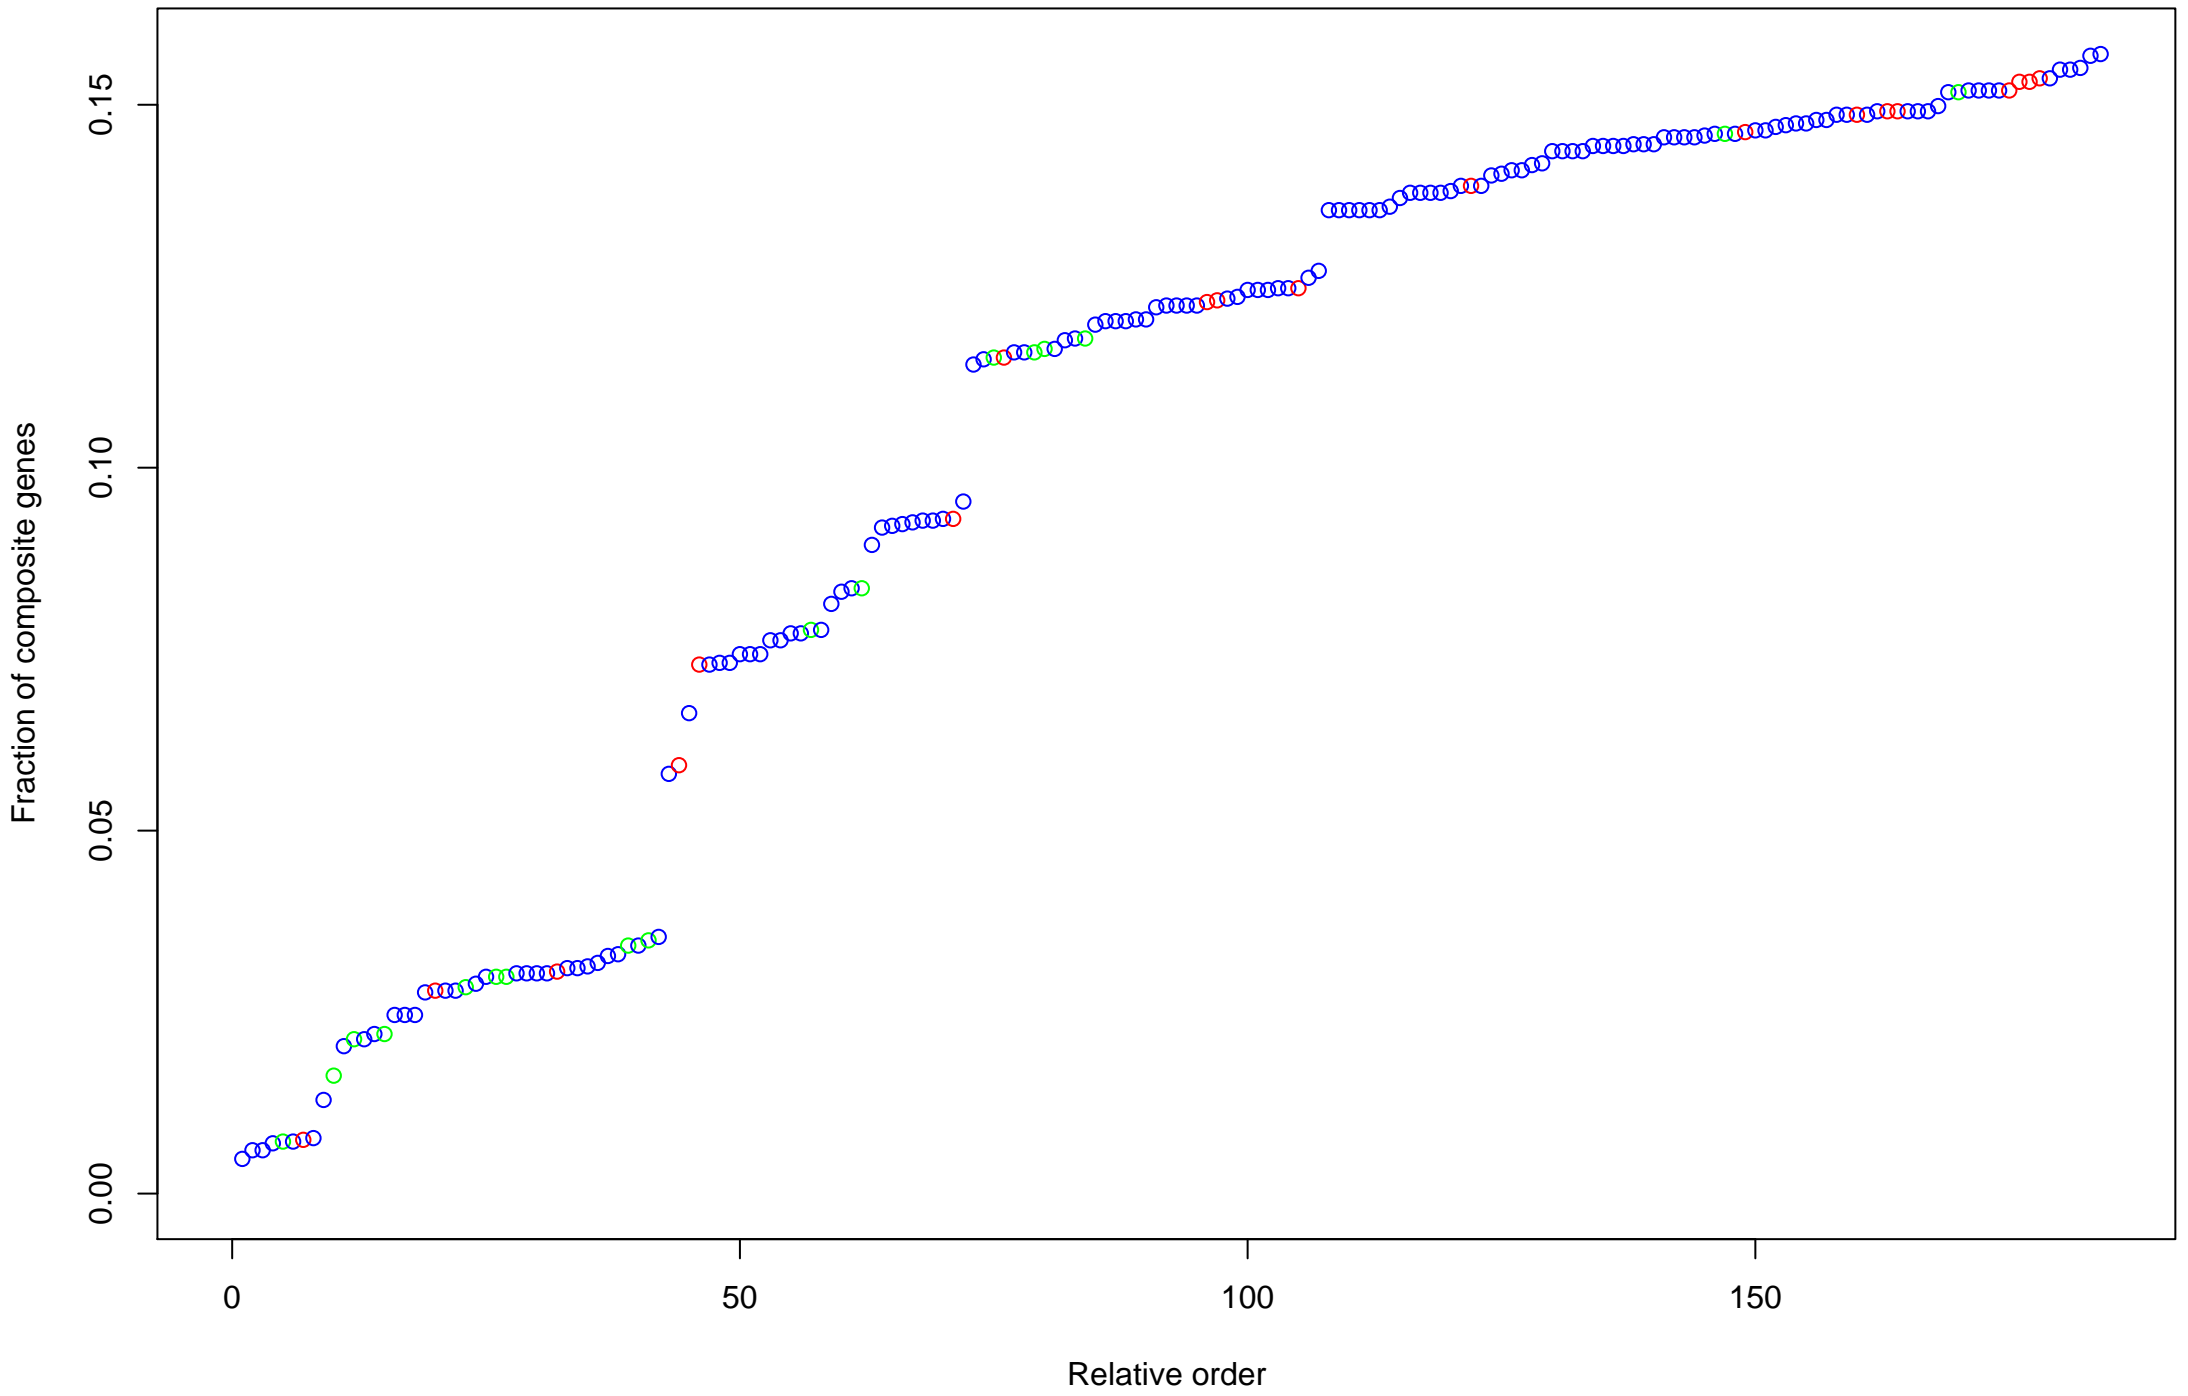

BPER-251-01 (*Bordetella pertussis*)

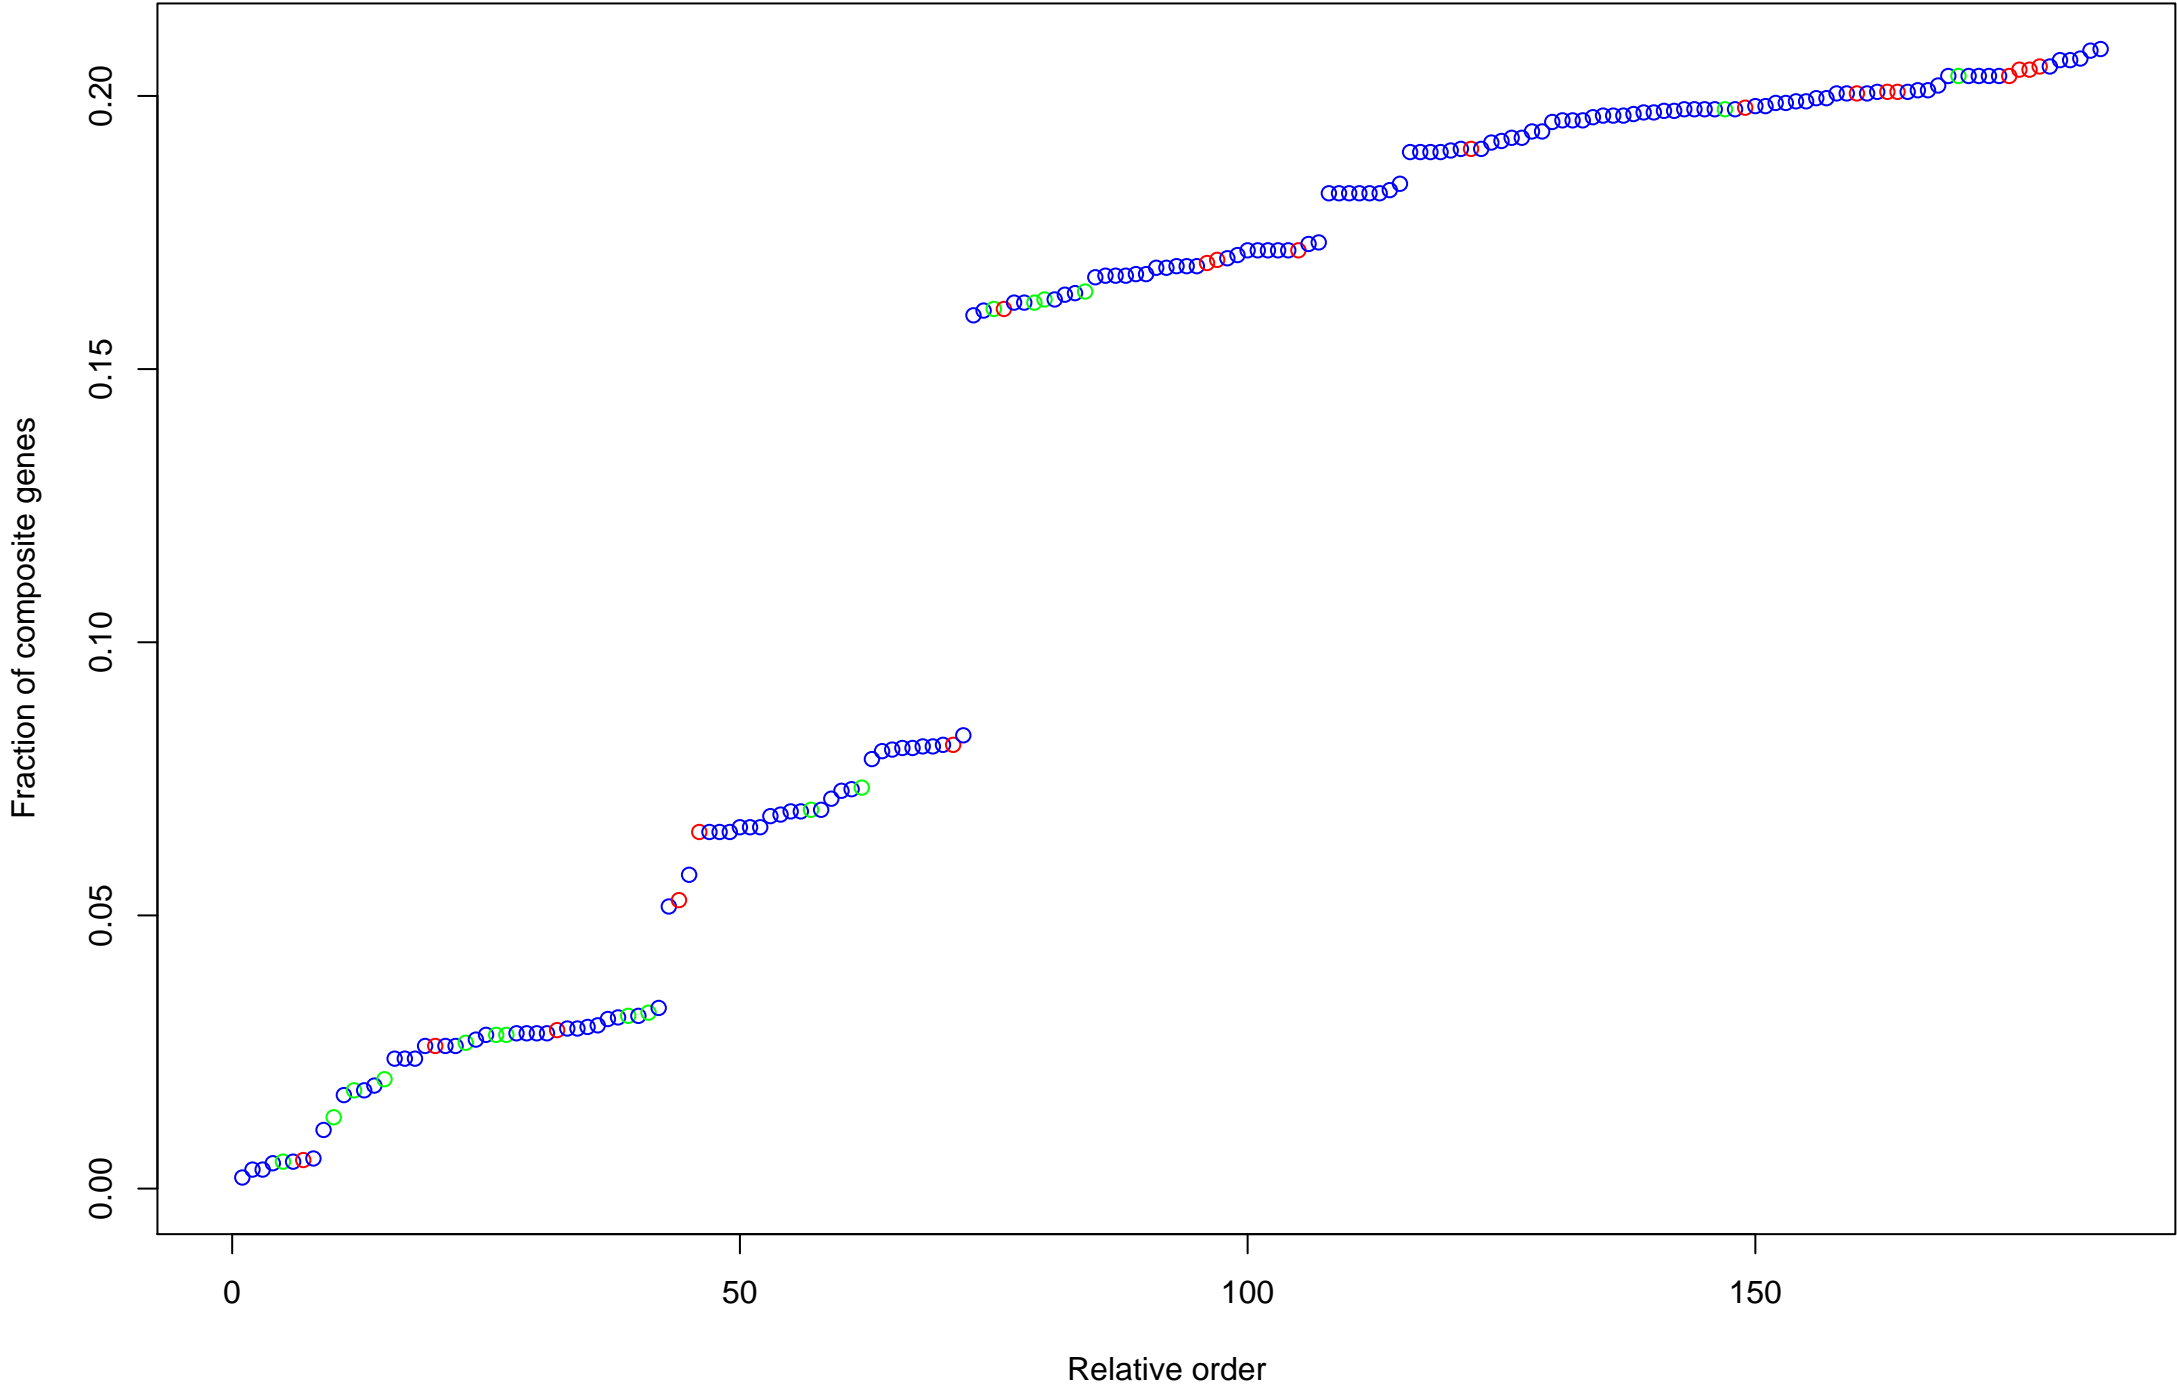

# PMAR-SS1-01 (*Prochlorococcus marinus*)

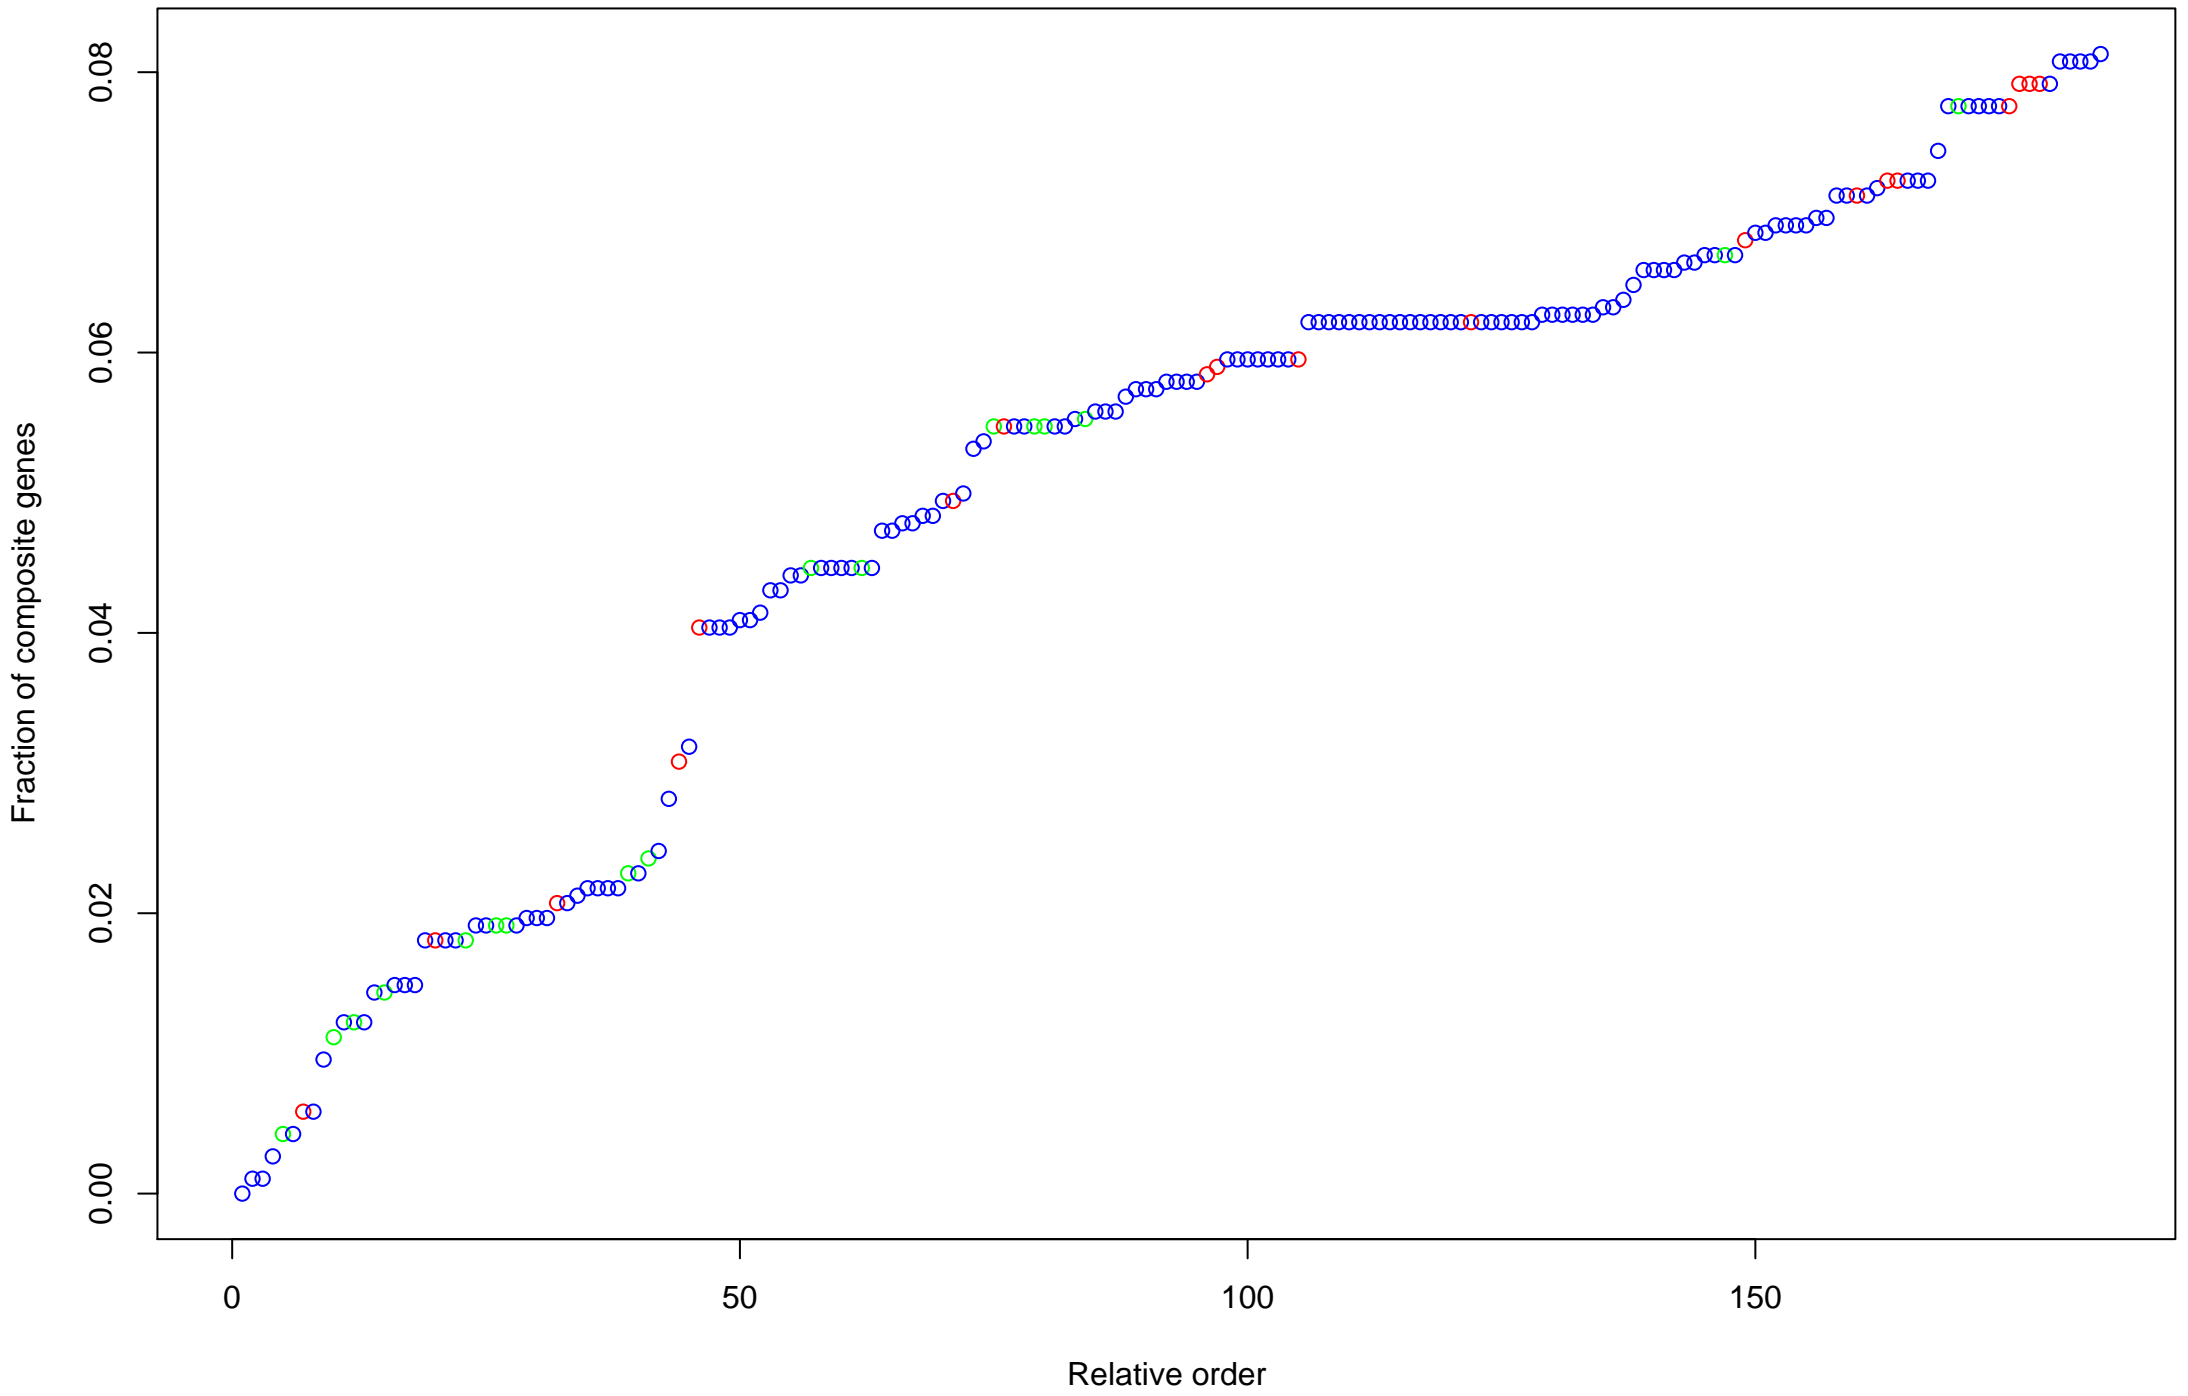



# PMAR-MED-01 (*Prochlorococcus marinus*)

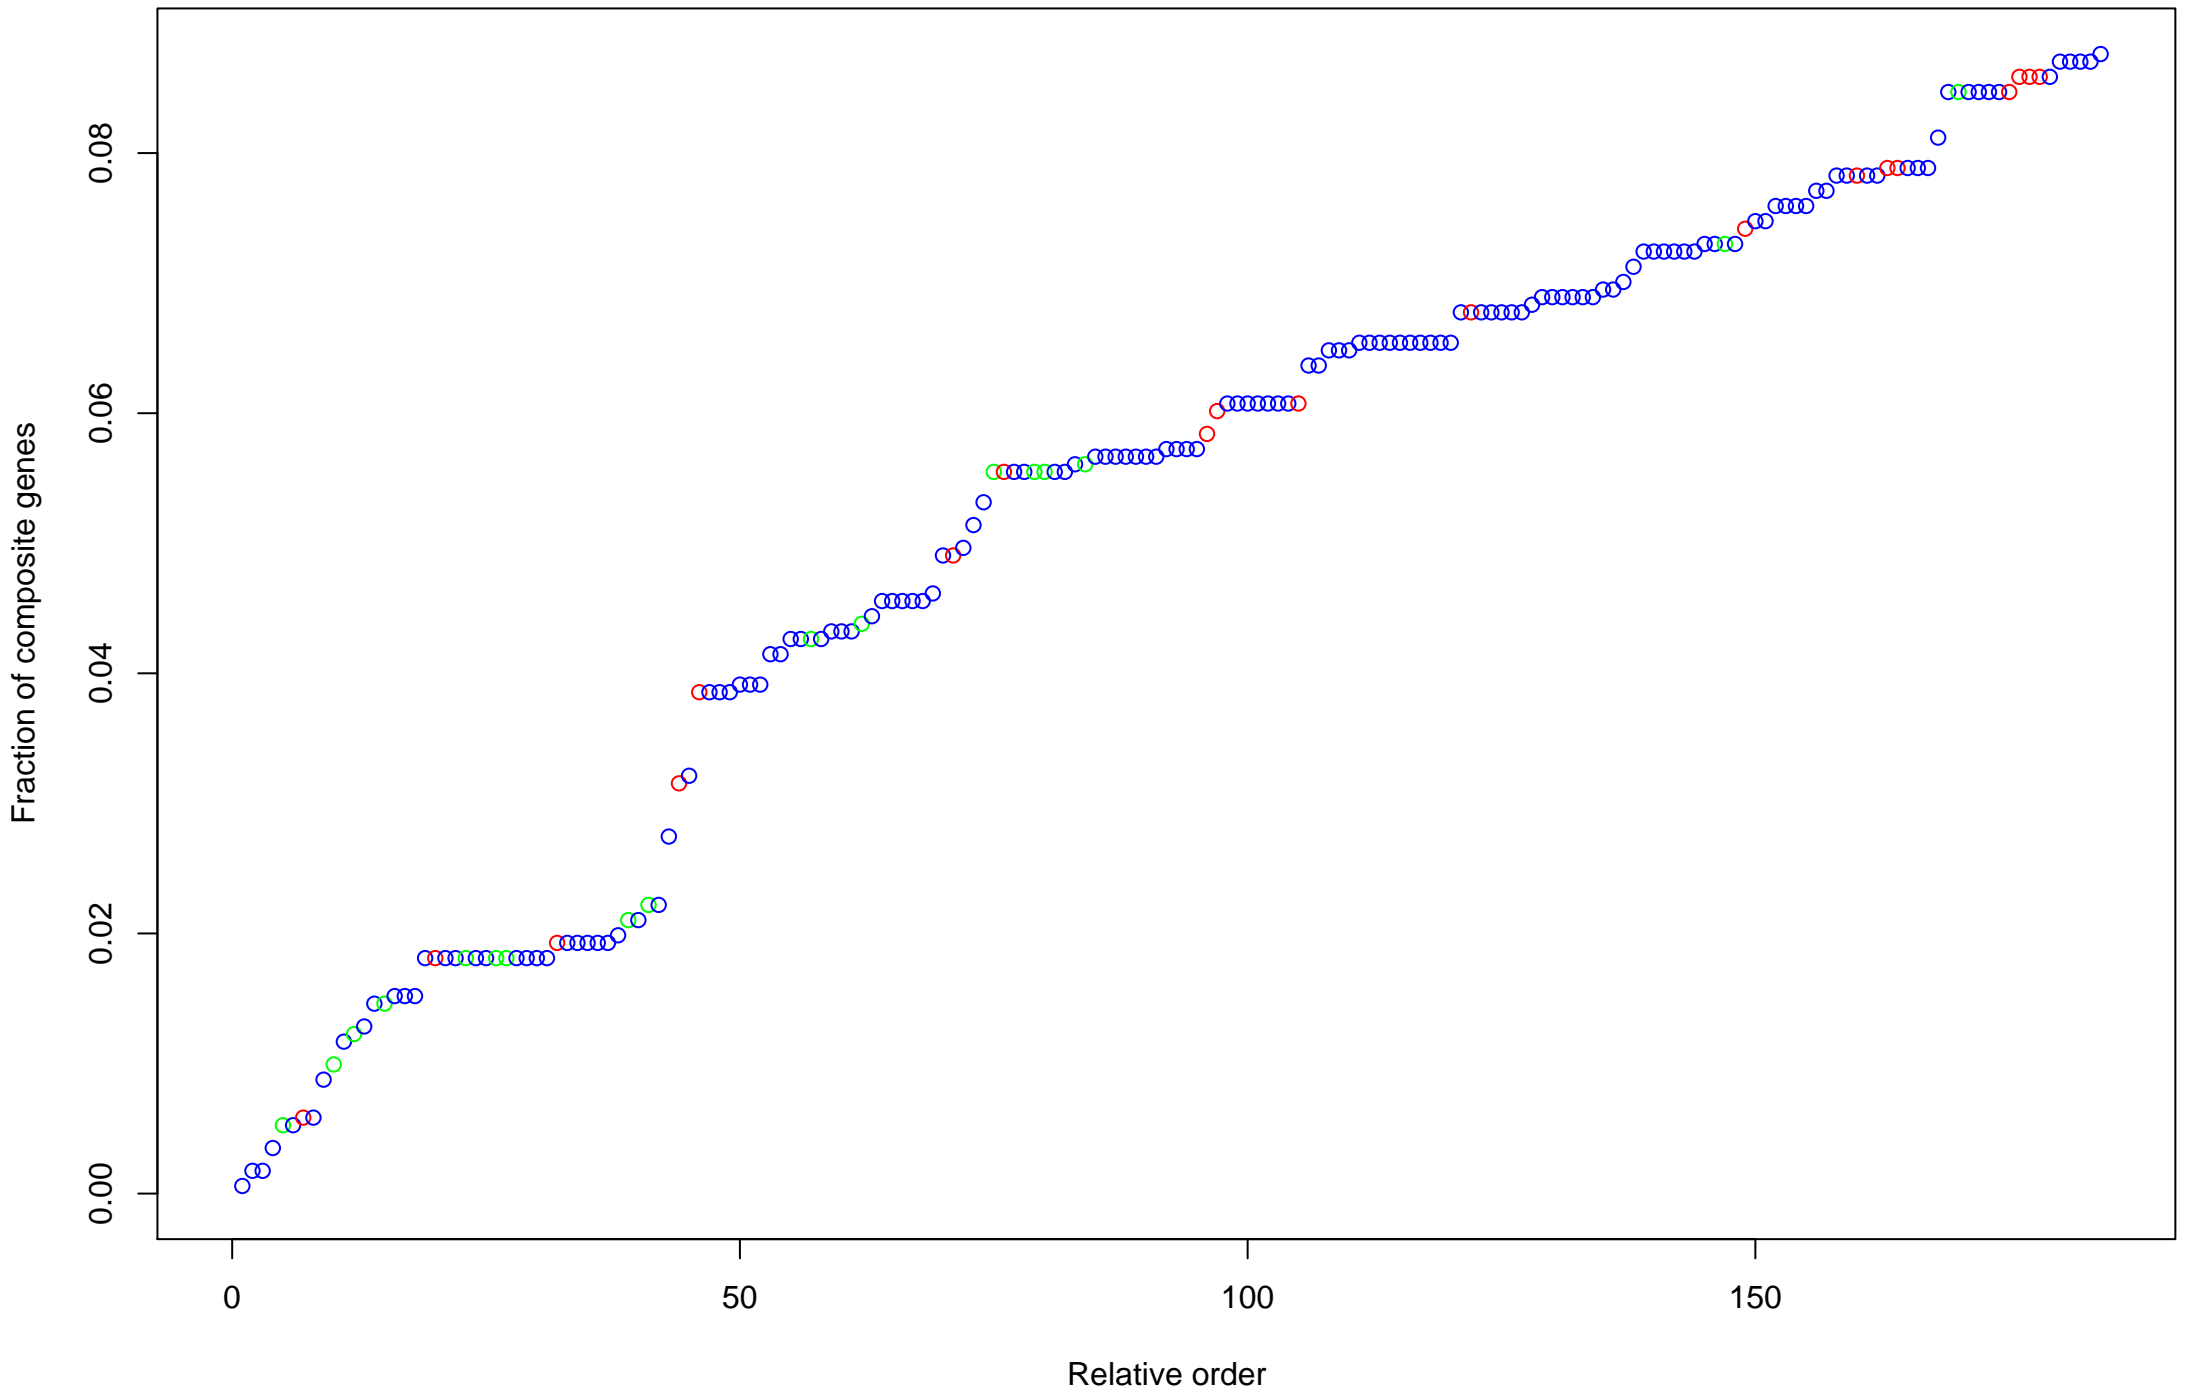

# PMAR-MIT-01 (*Prochlorococcus marinus*)

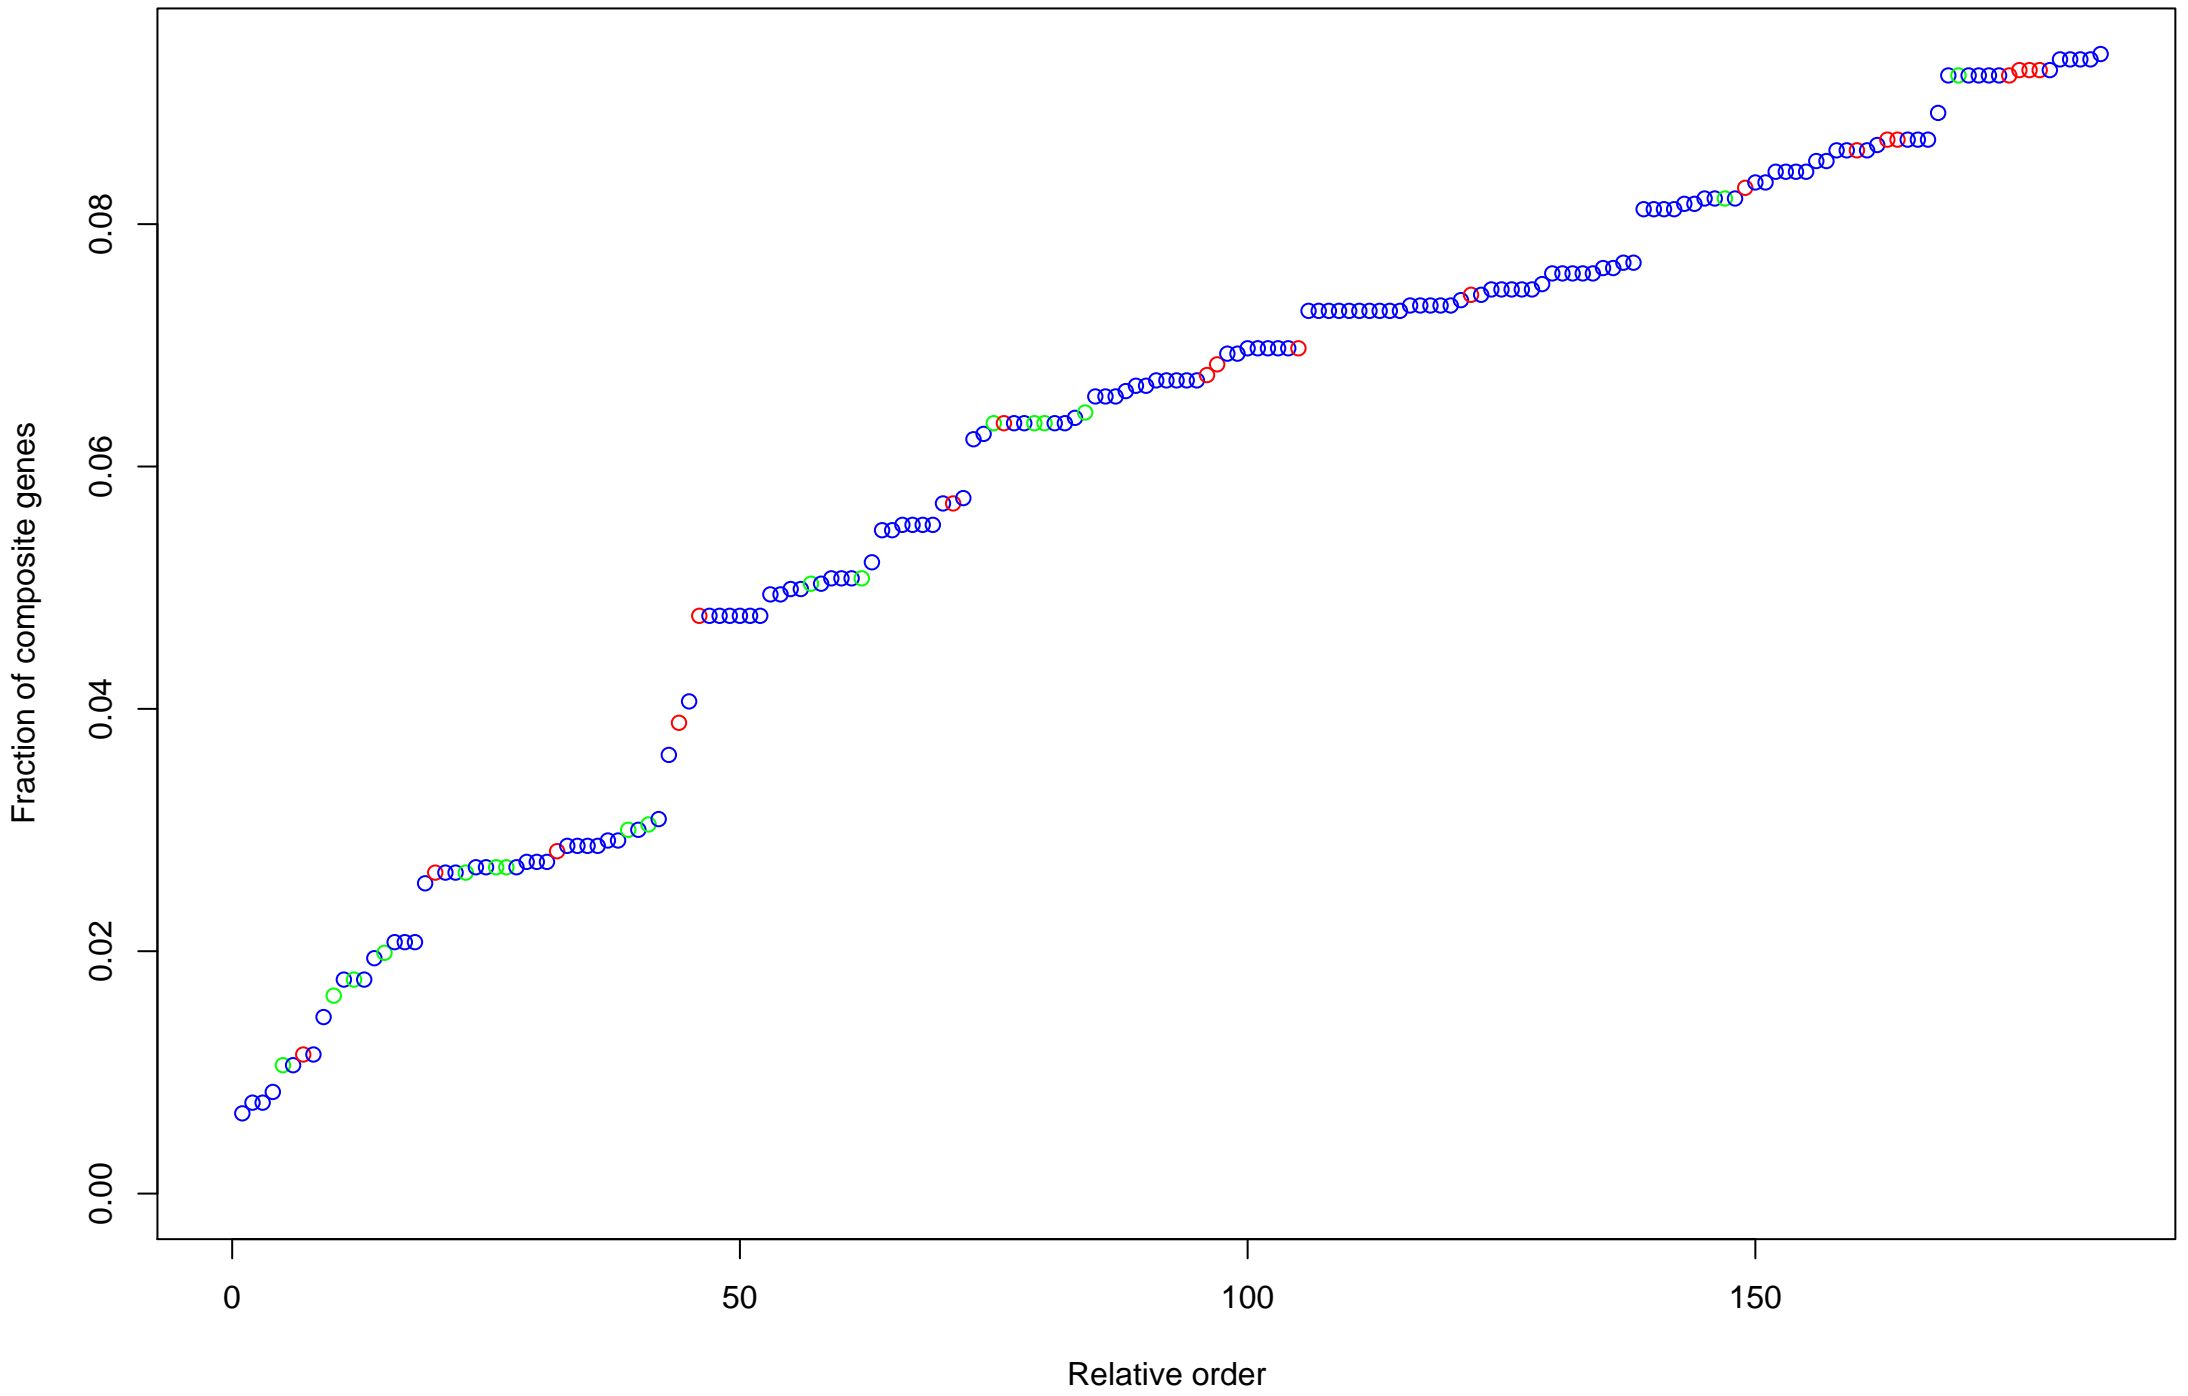

# SYCC-WH8-01 (Synechococcus sp.)

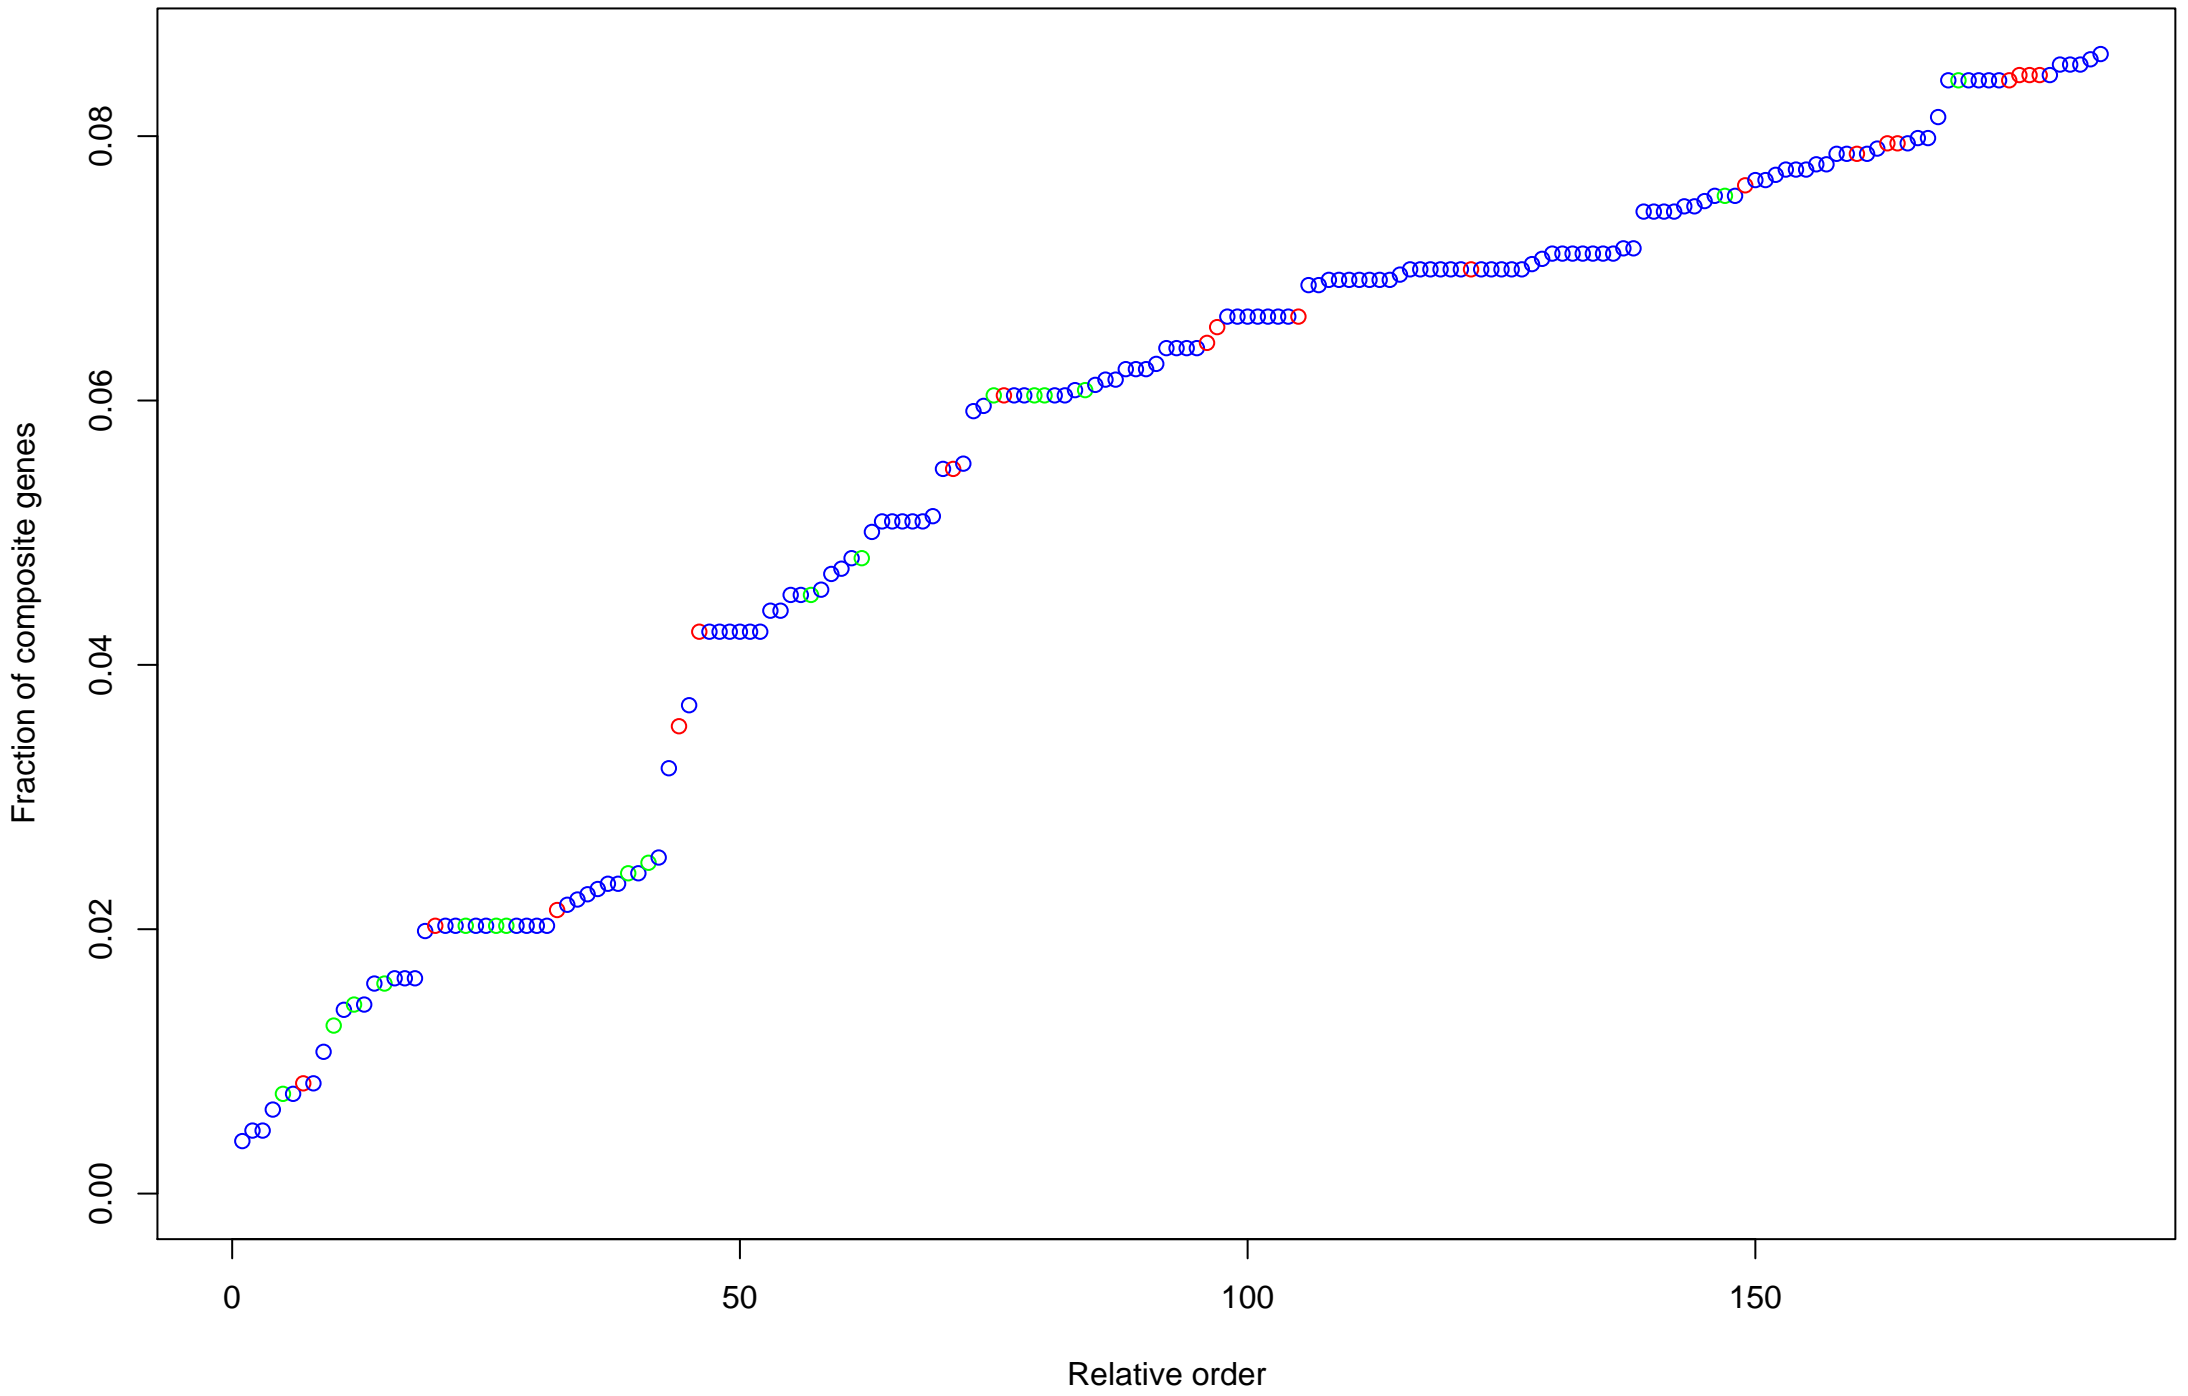

# MGAL-RLO-01 (*Mycoplasma gallisepticum*)

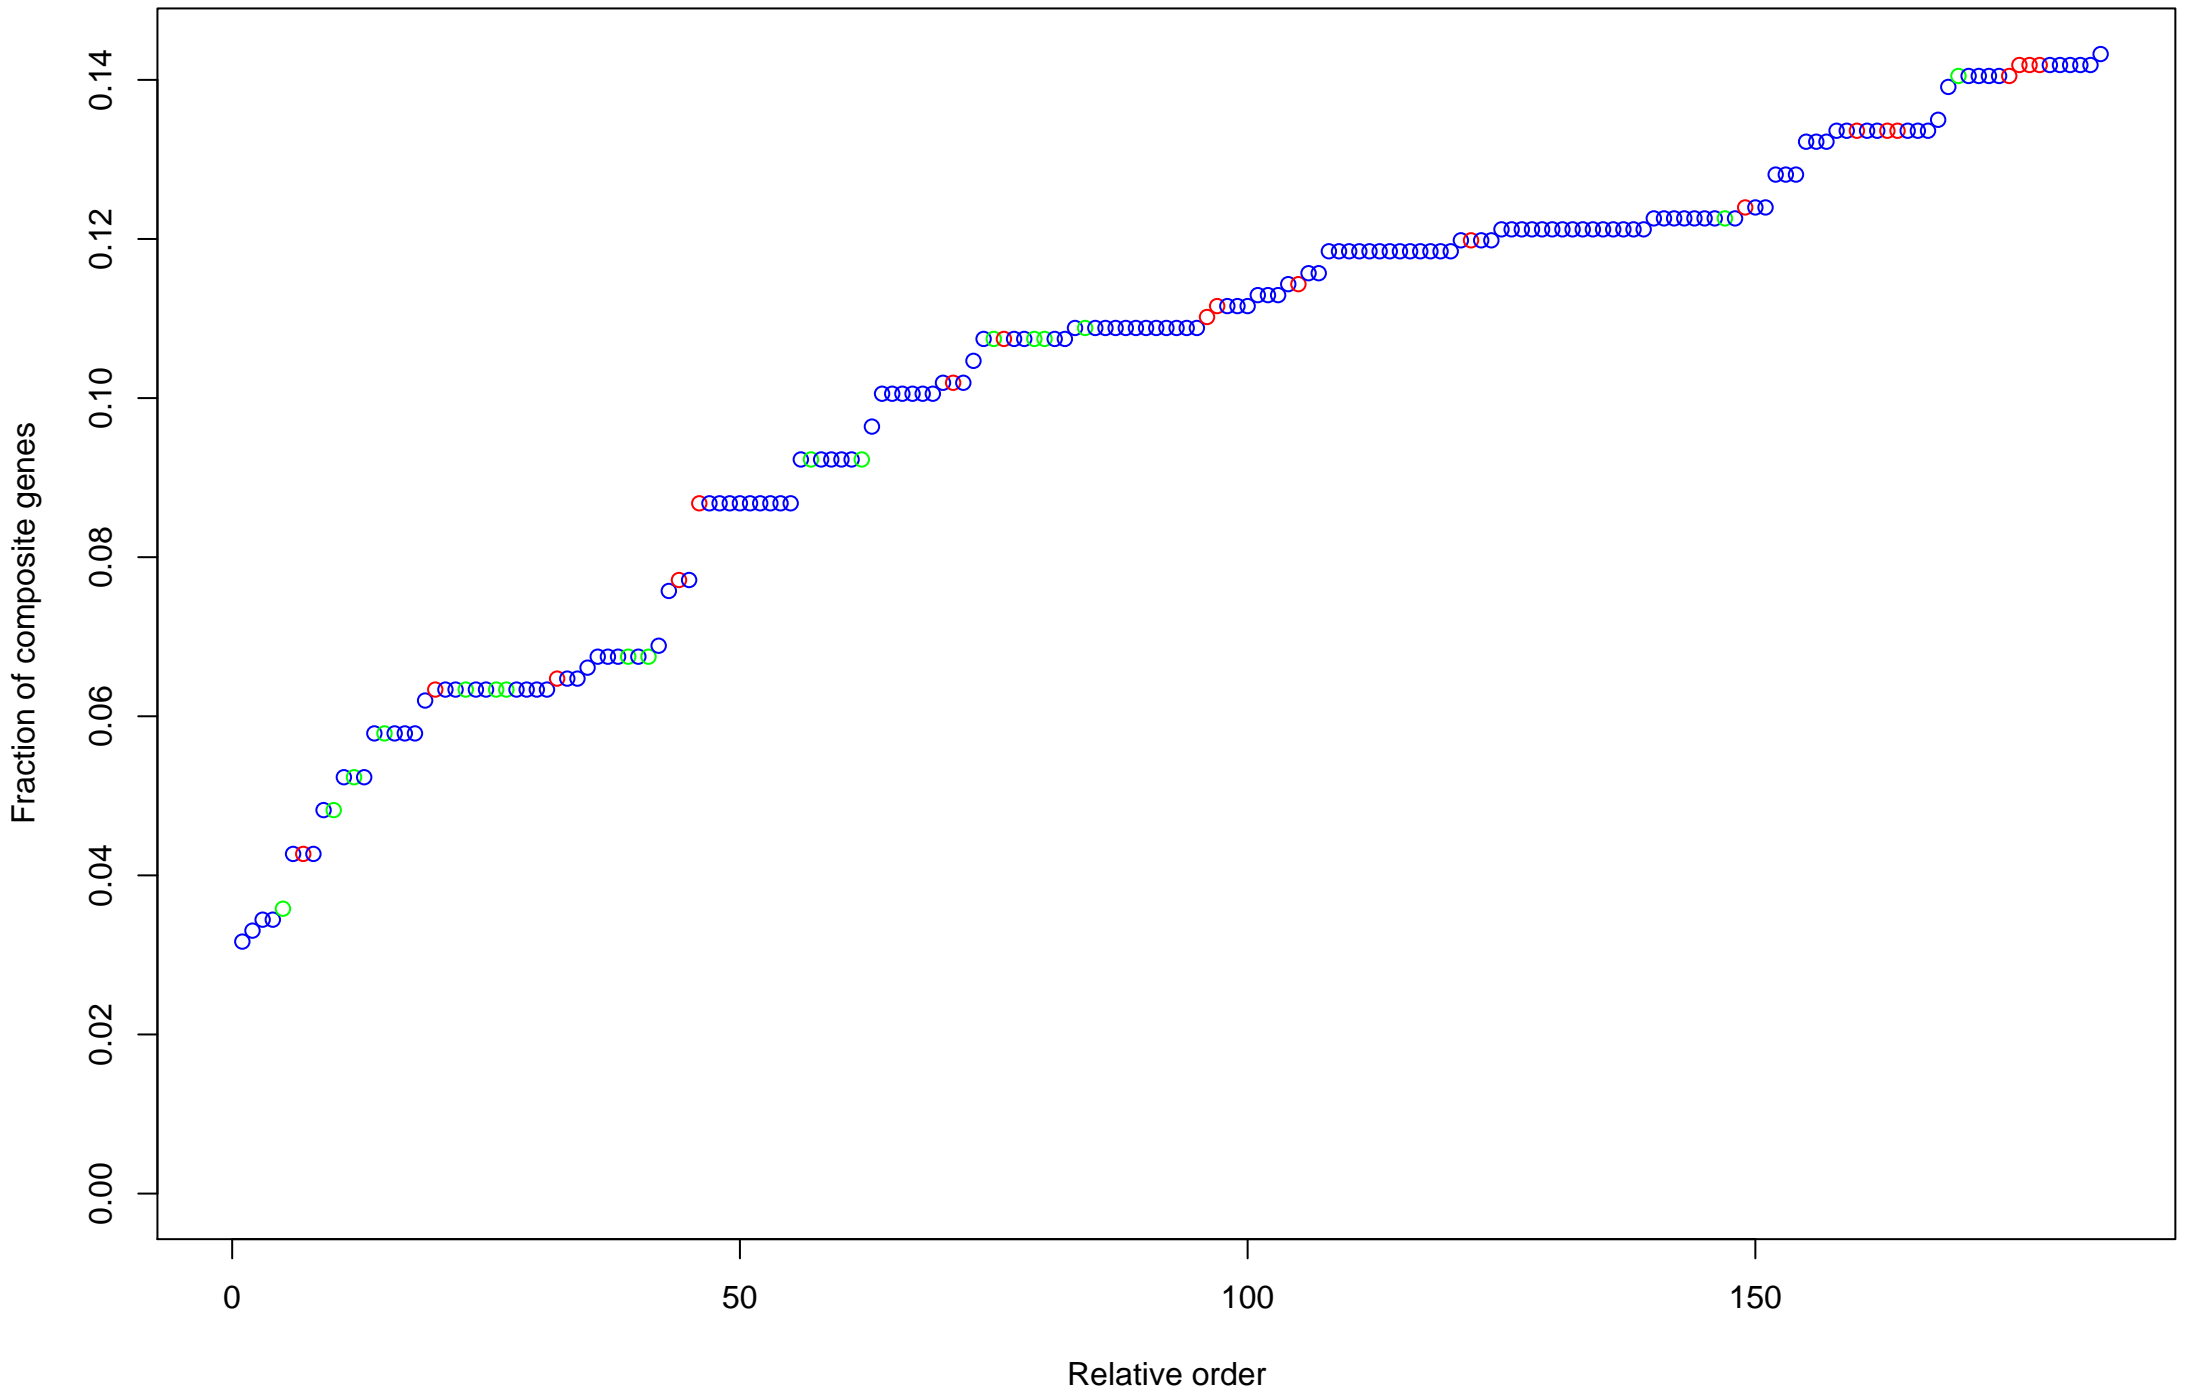

PSYR-DC3-01 (*Pseudomonas syringae* pv. *tomato*)

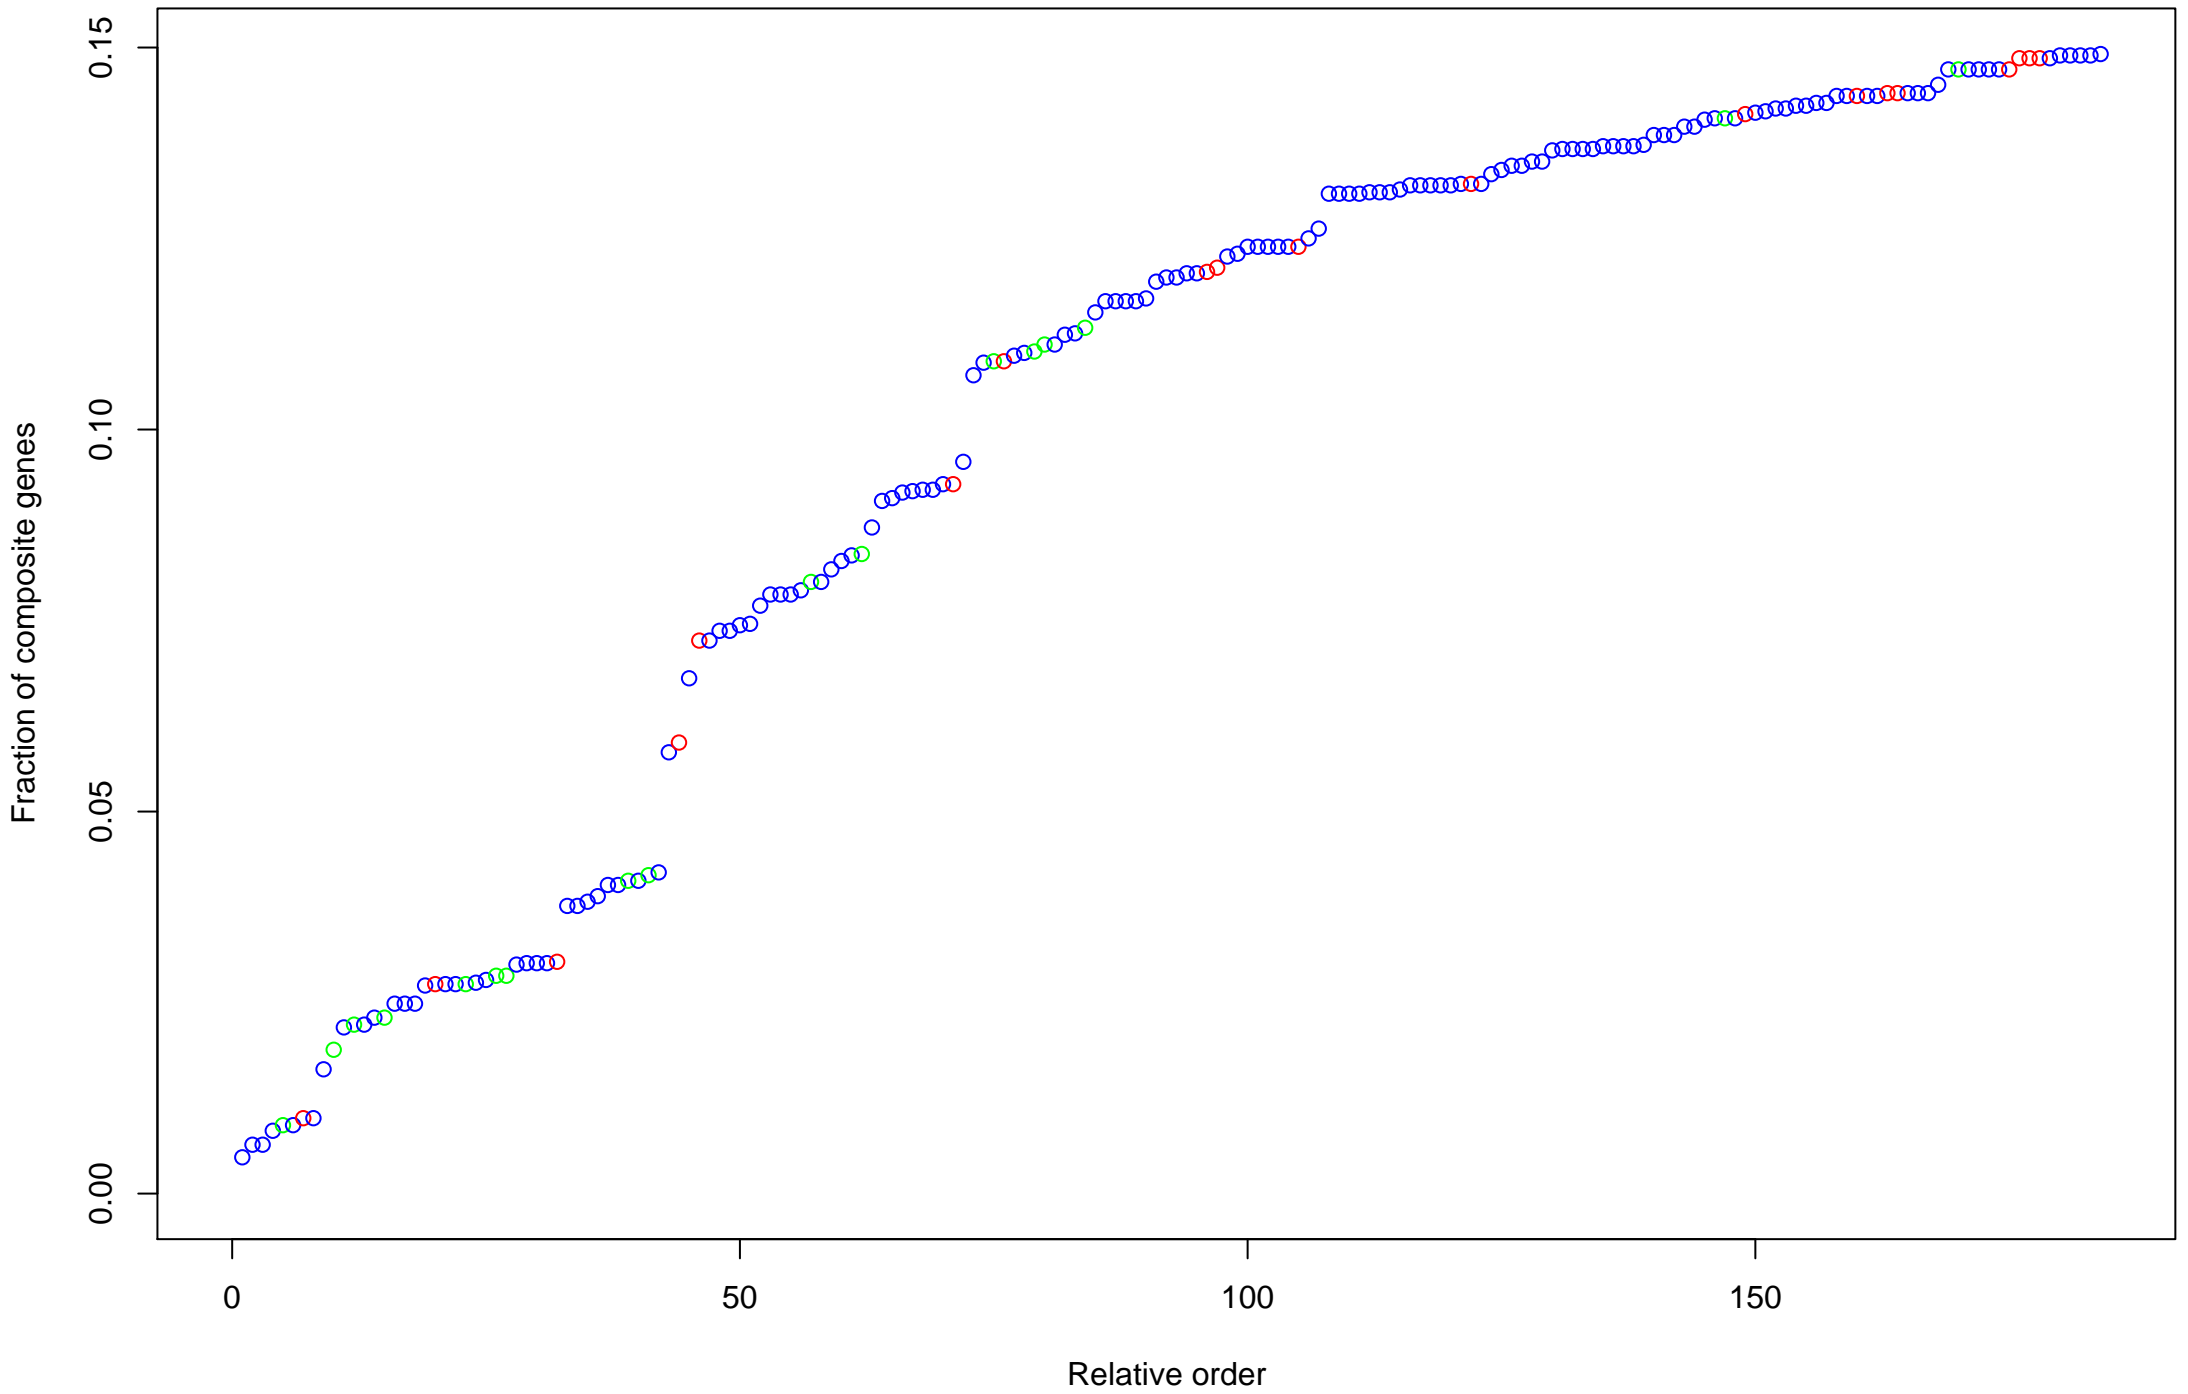

# PGIN-W83-01 (*Porphyromonas gingivalis*)

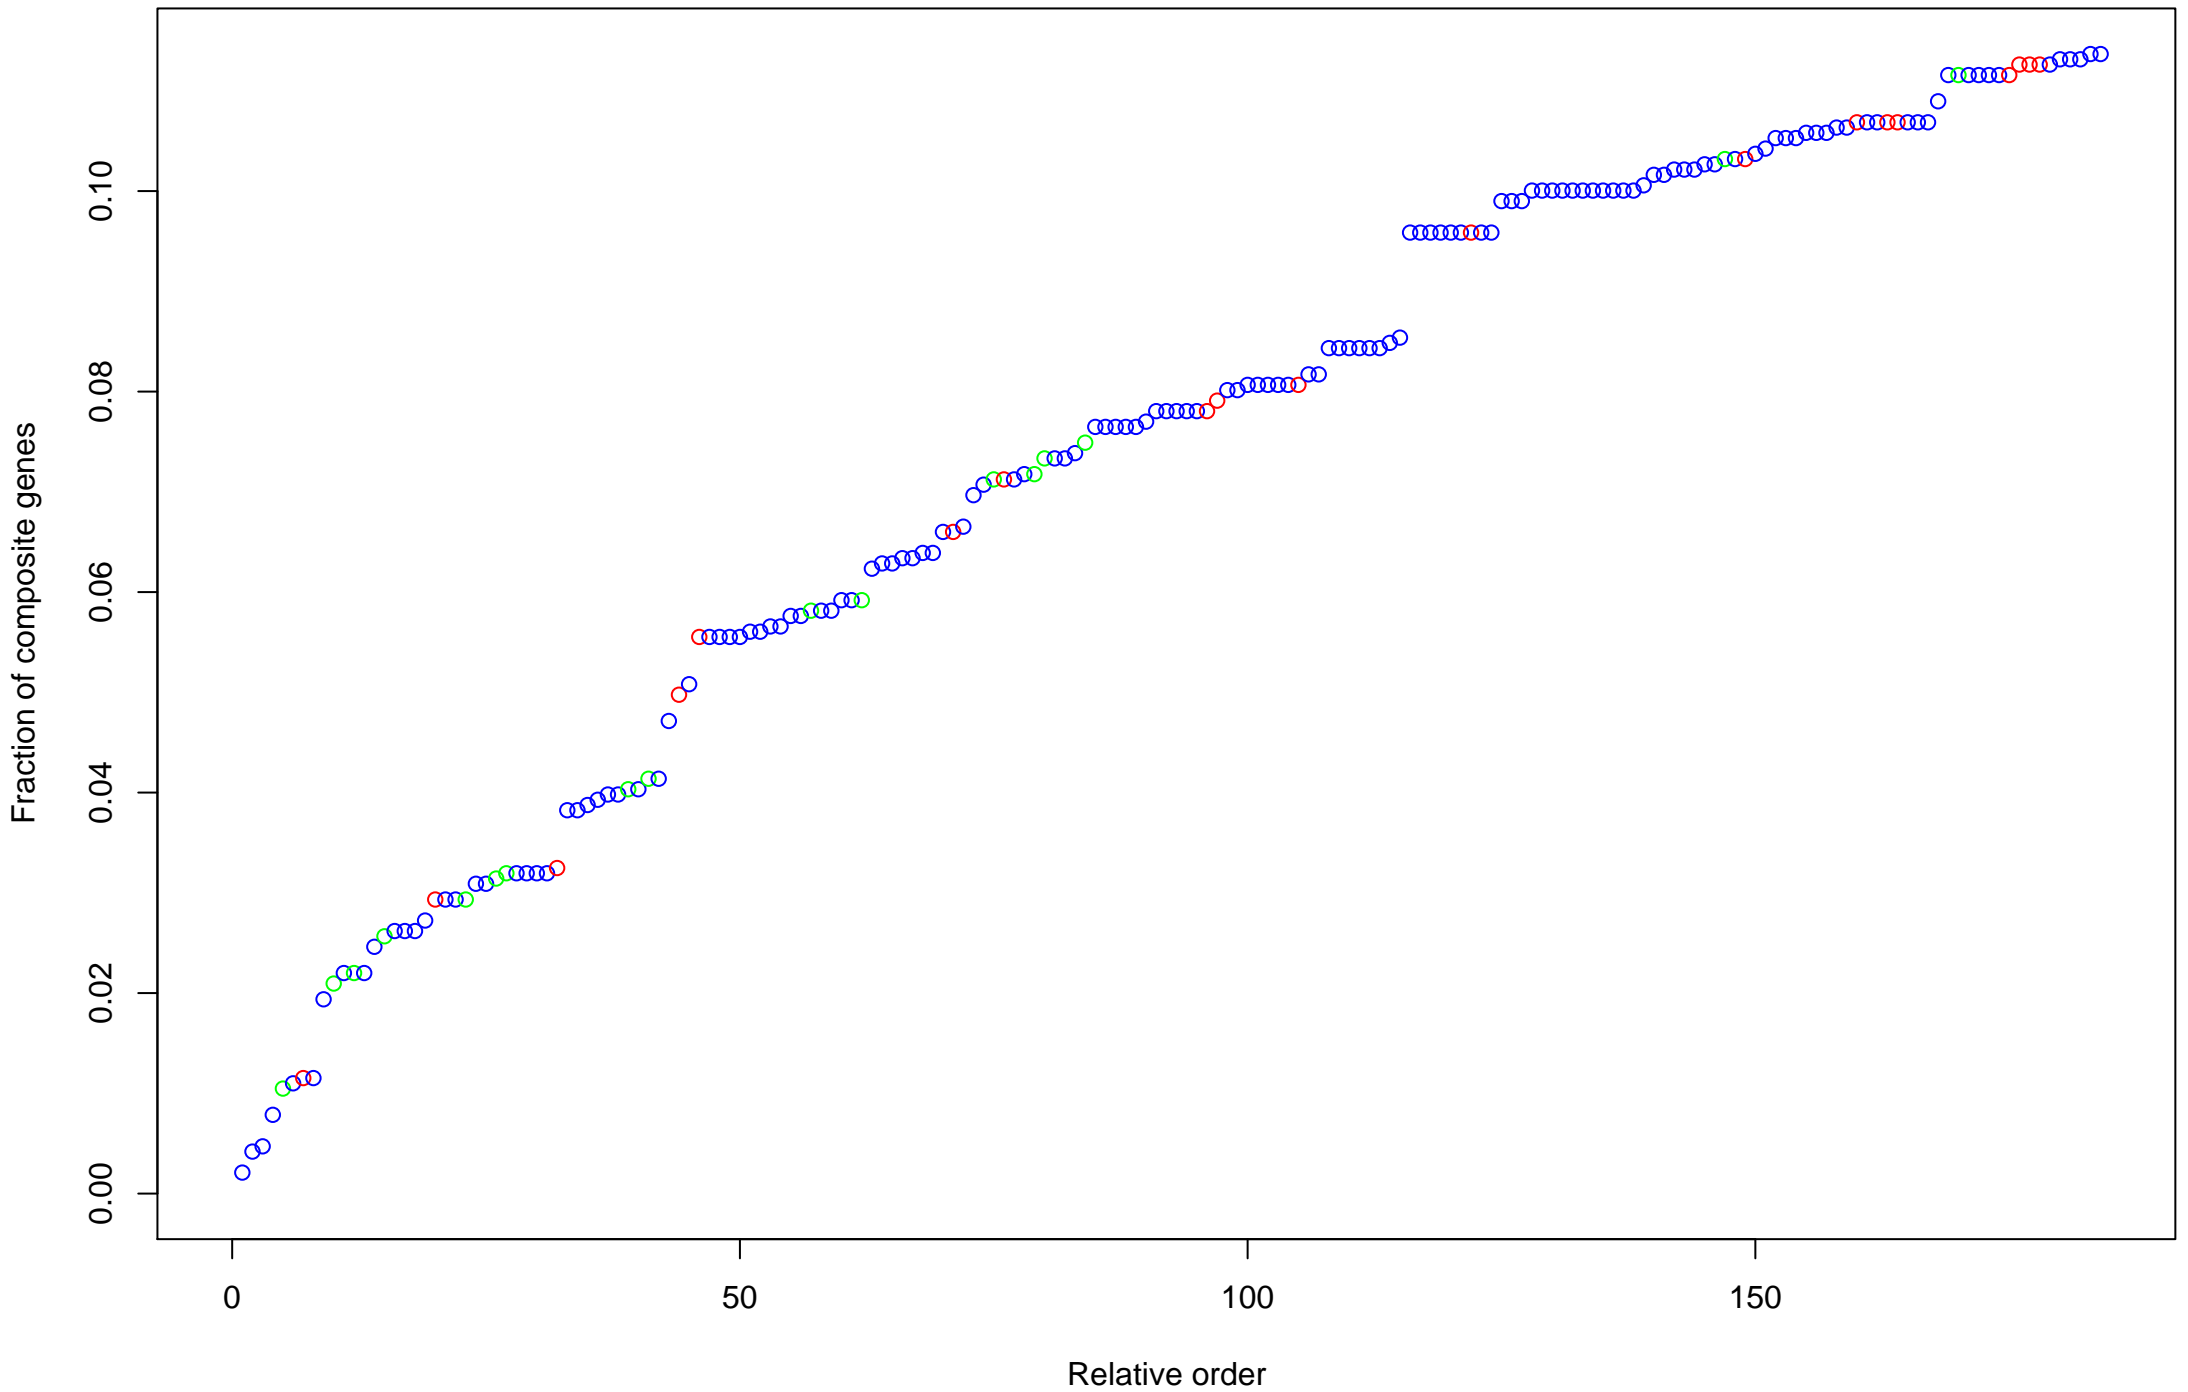

# CVIO-472-01 (*Chromobacterium violaceum*)

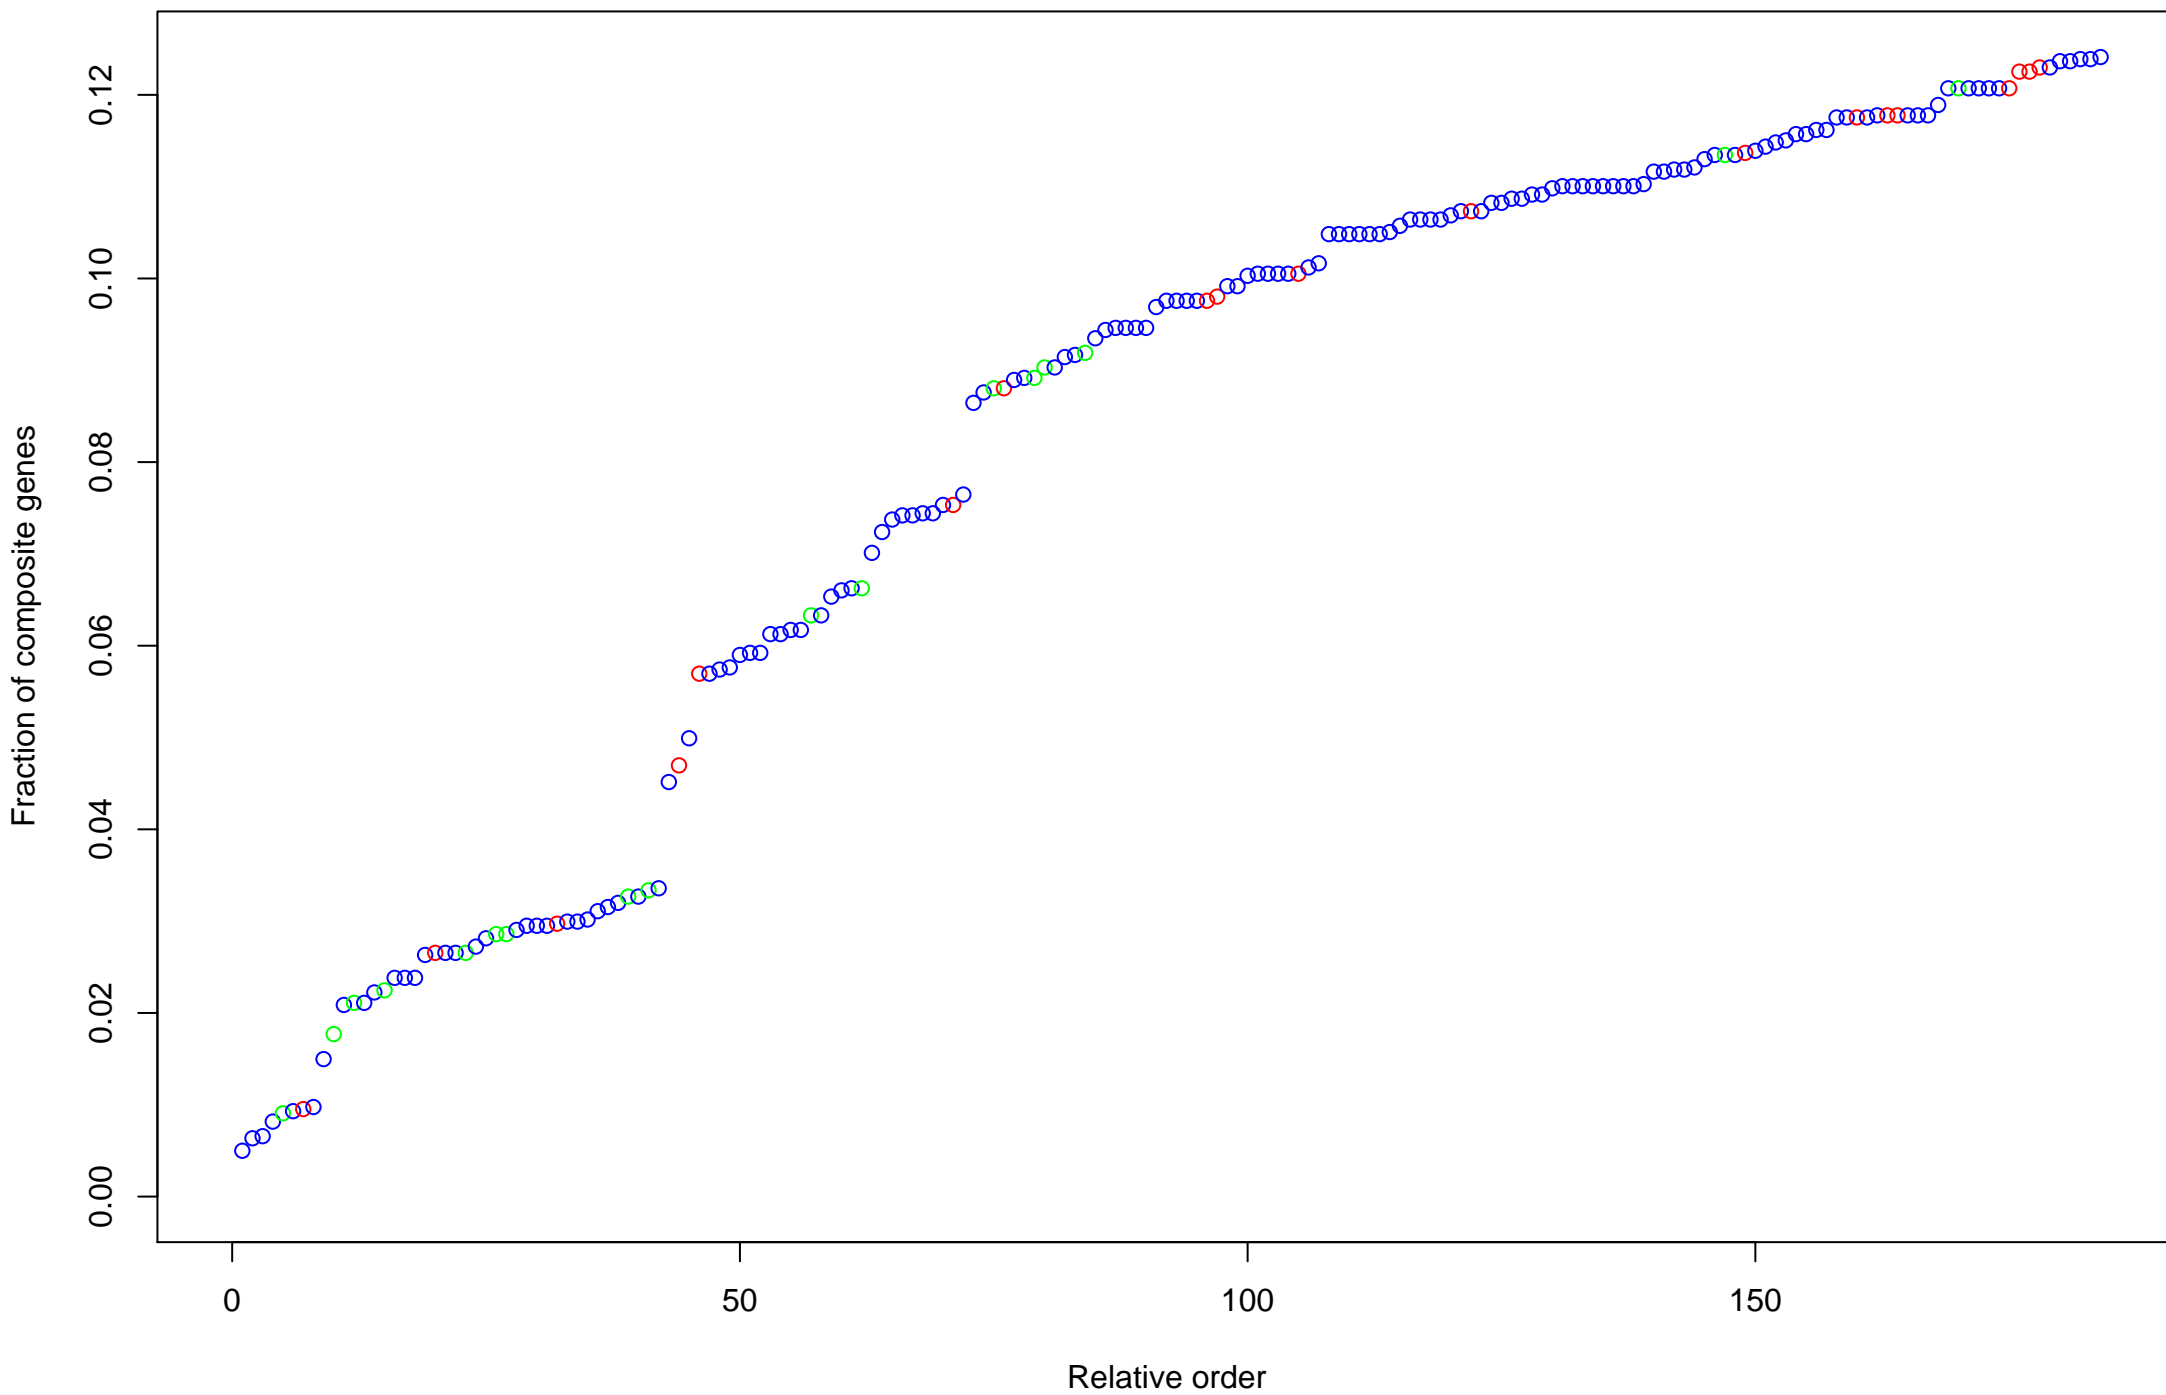

# WSUC-740-01 (*Wolinella succinogenes*)

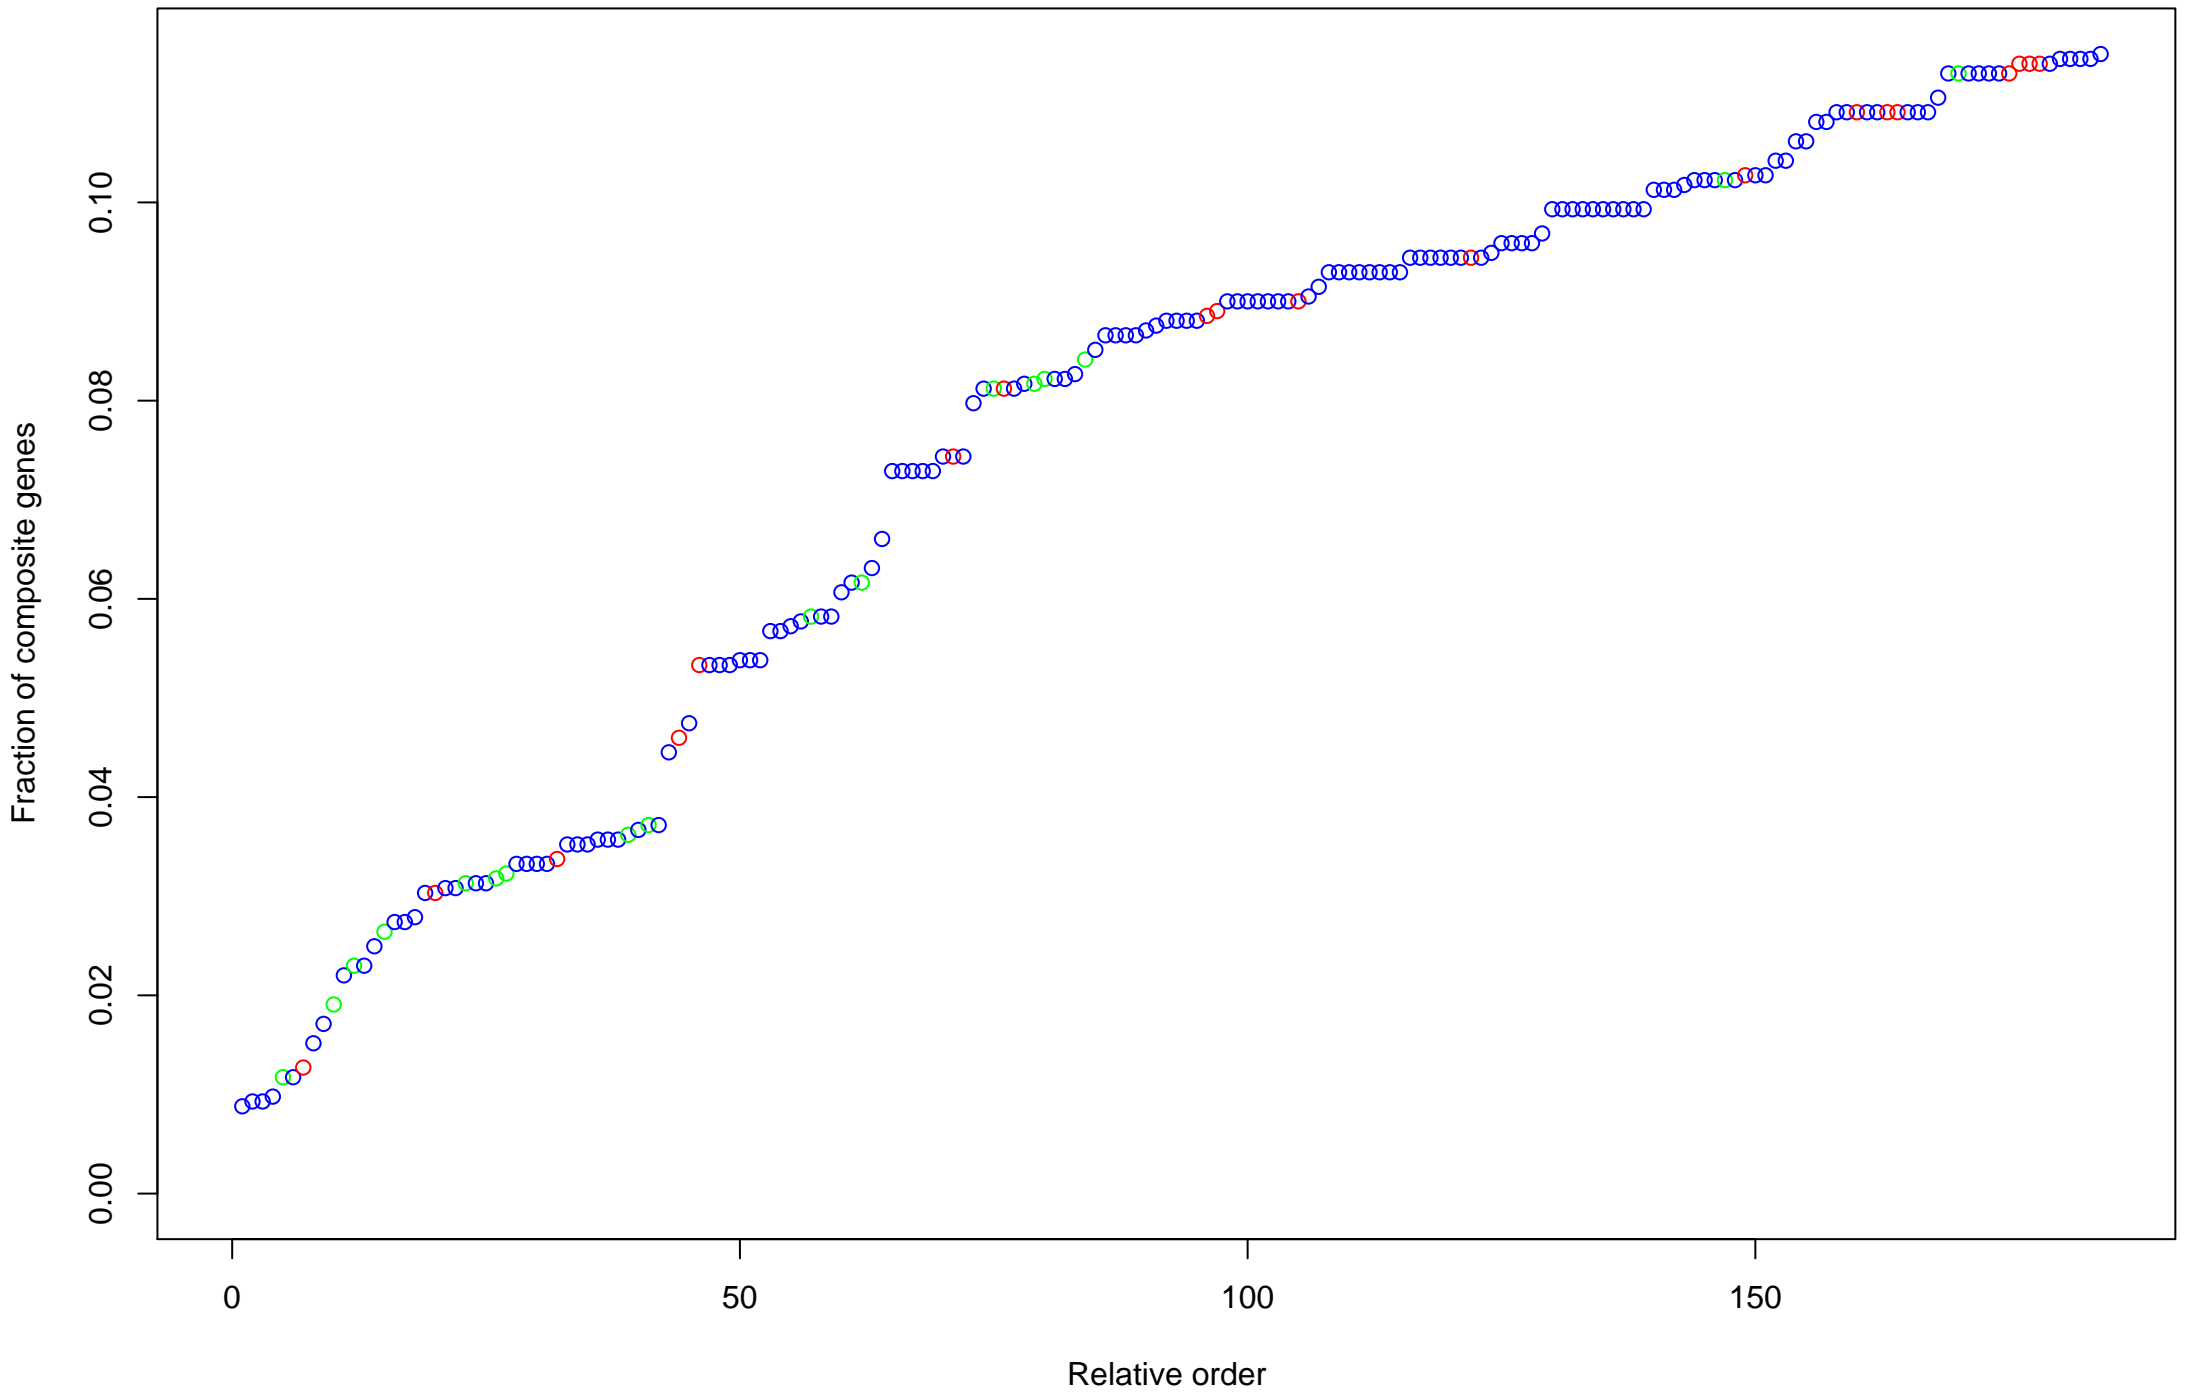



# PLUM-TO1-01 (*Photorhabdus luminescens*)

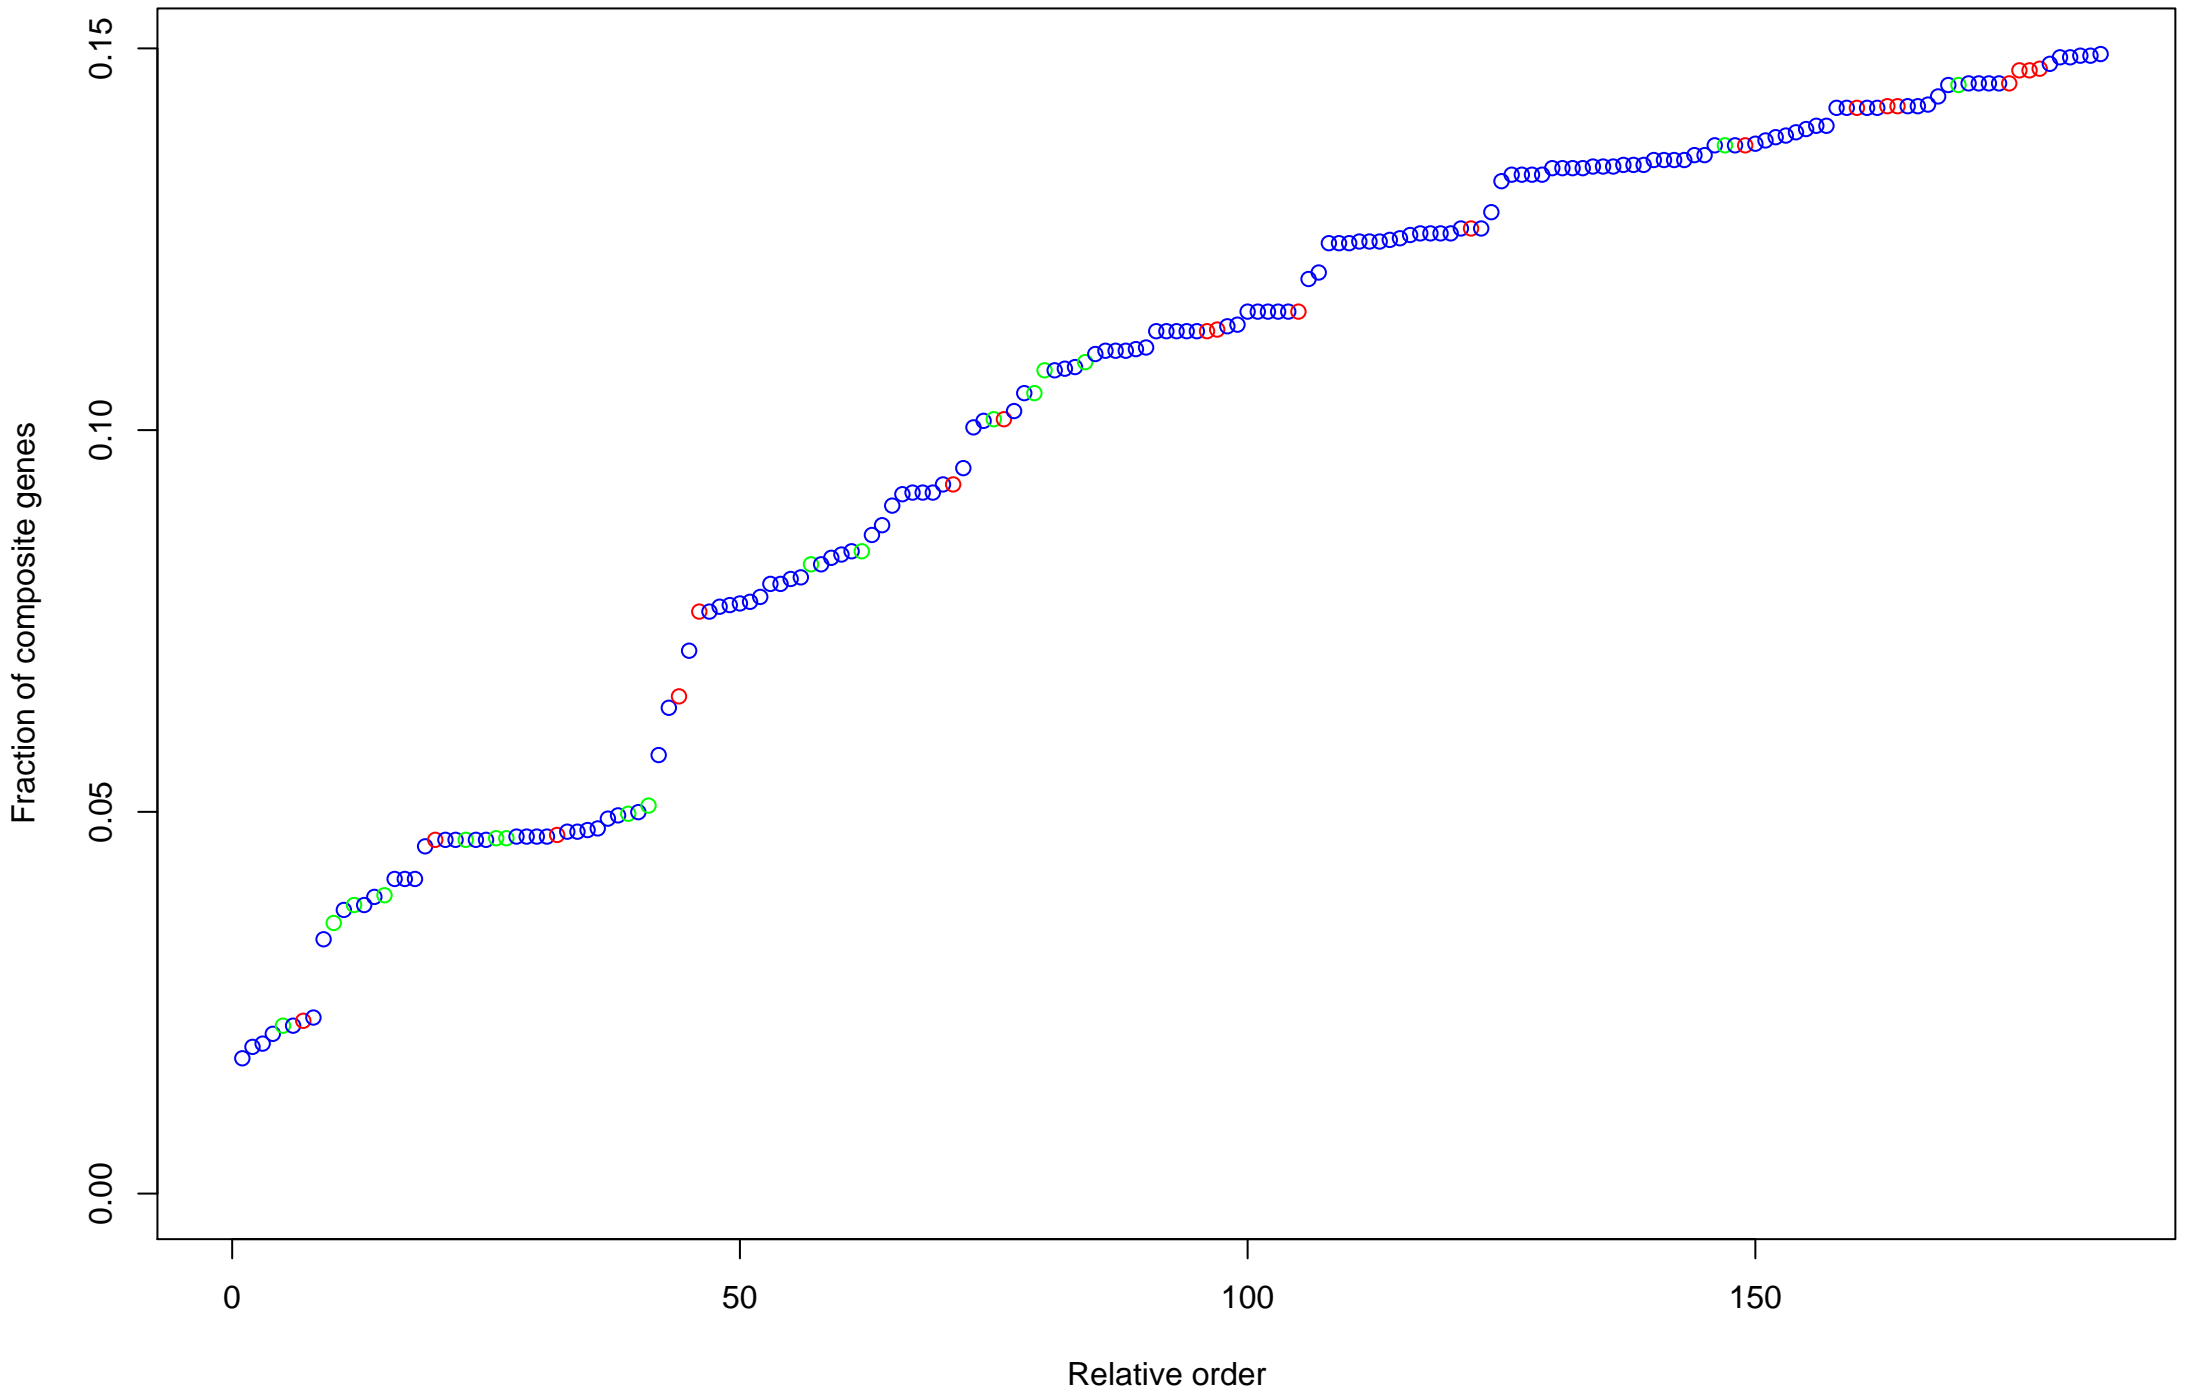

# GVIO-421-01 (*Gloeobacter violaceus*)

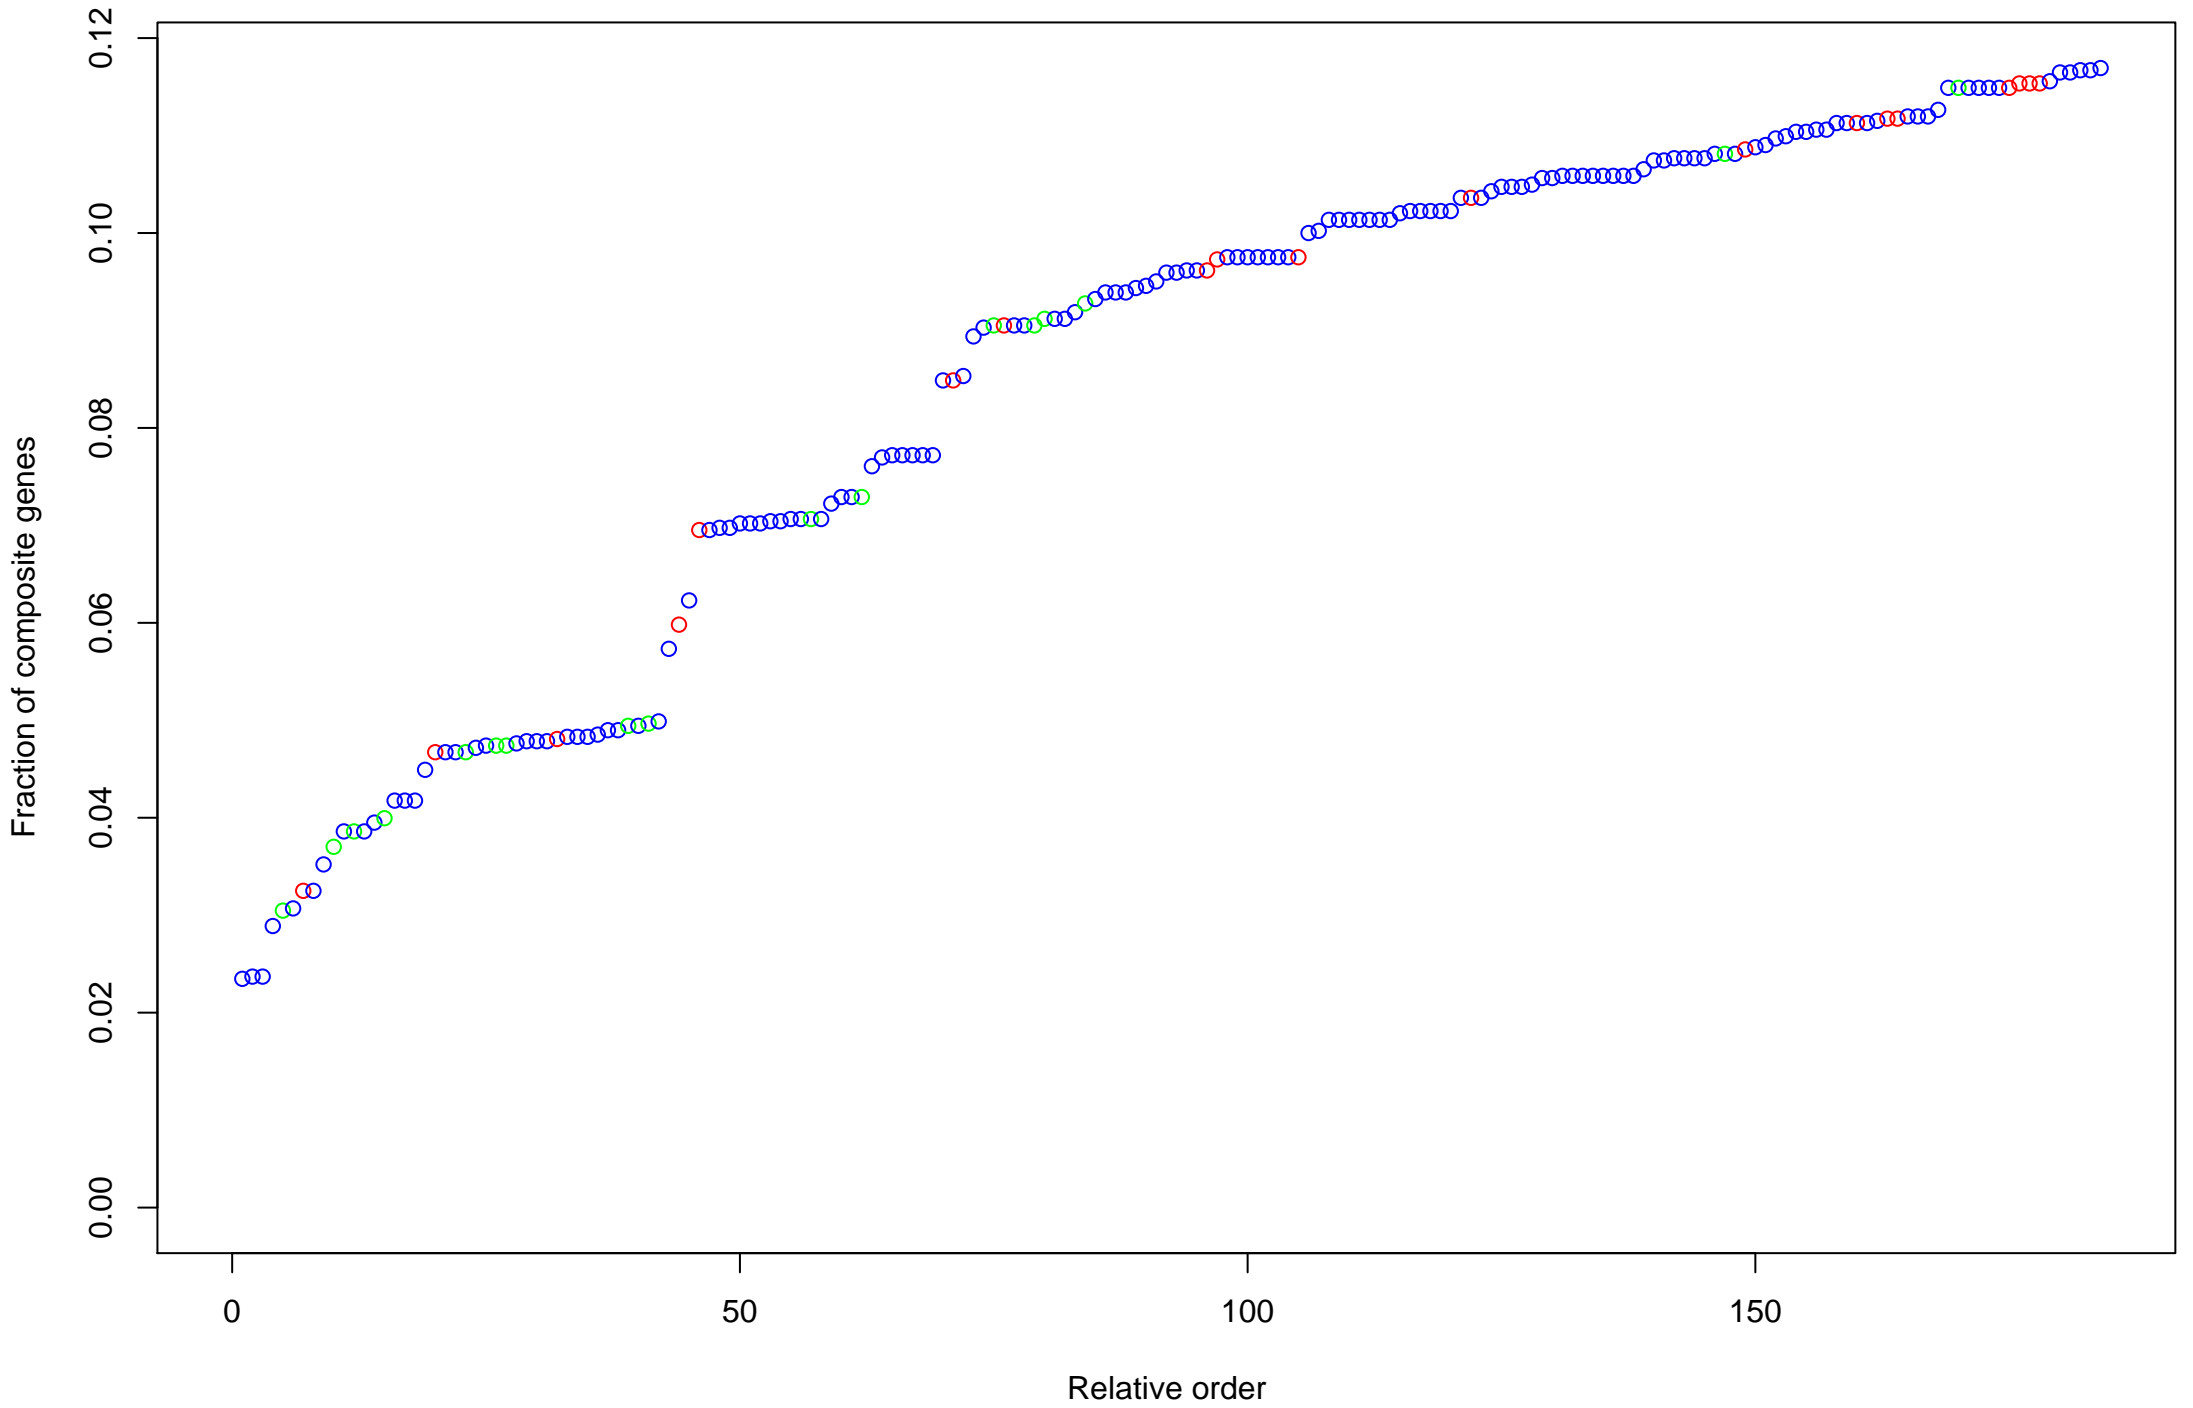

# NEQU-N4M-01 (*Nanoarchaeum equitans*)

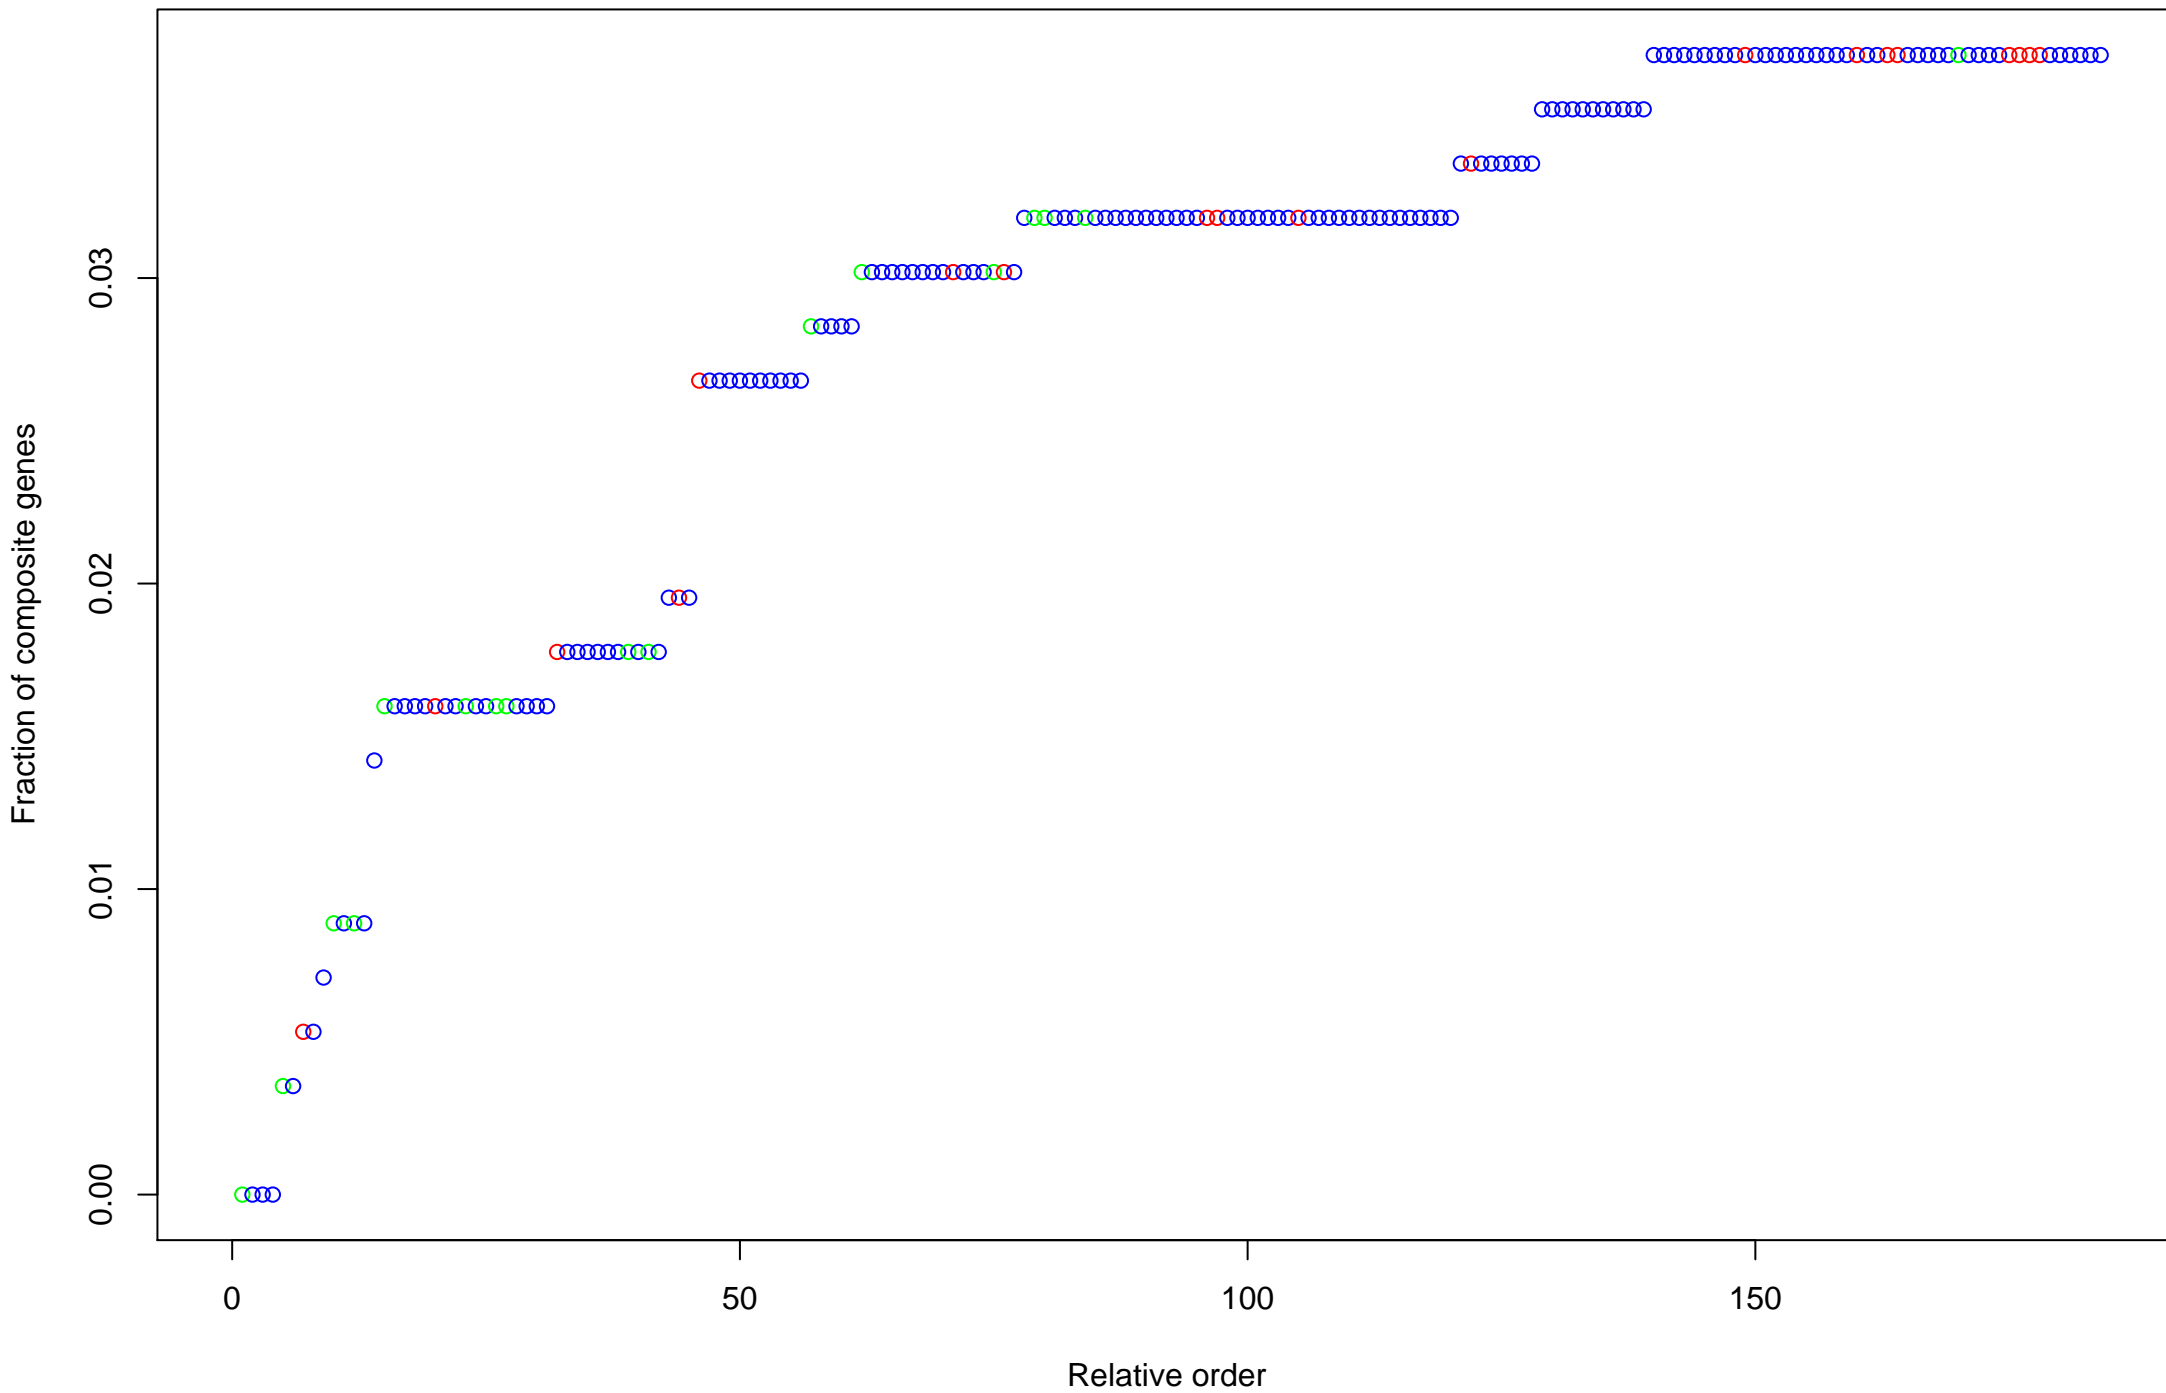

# CDIP-129-01 (*Corynebacterium diphtheriae*)

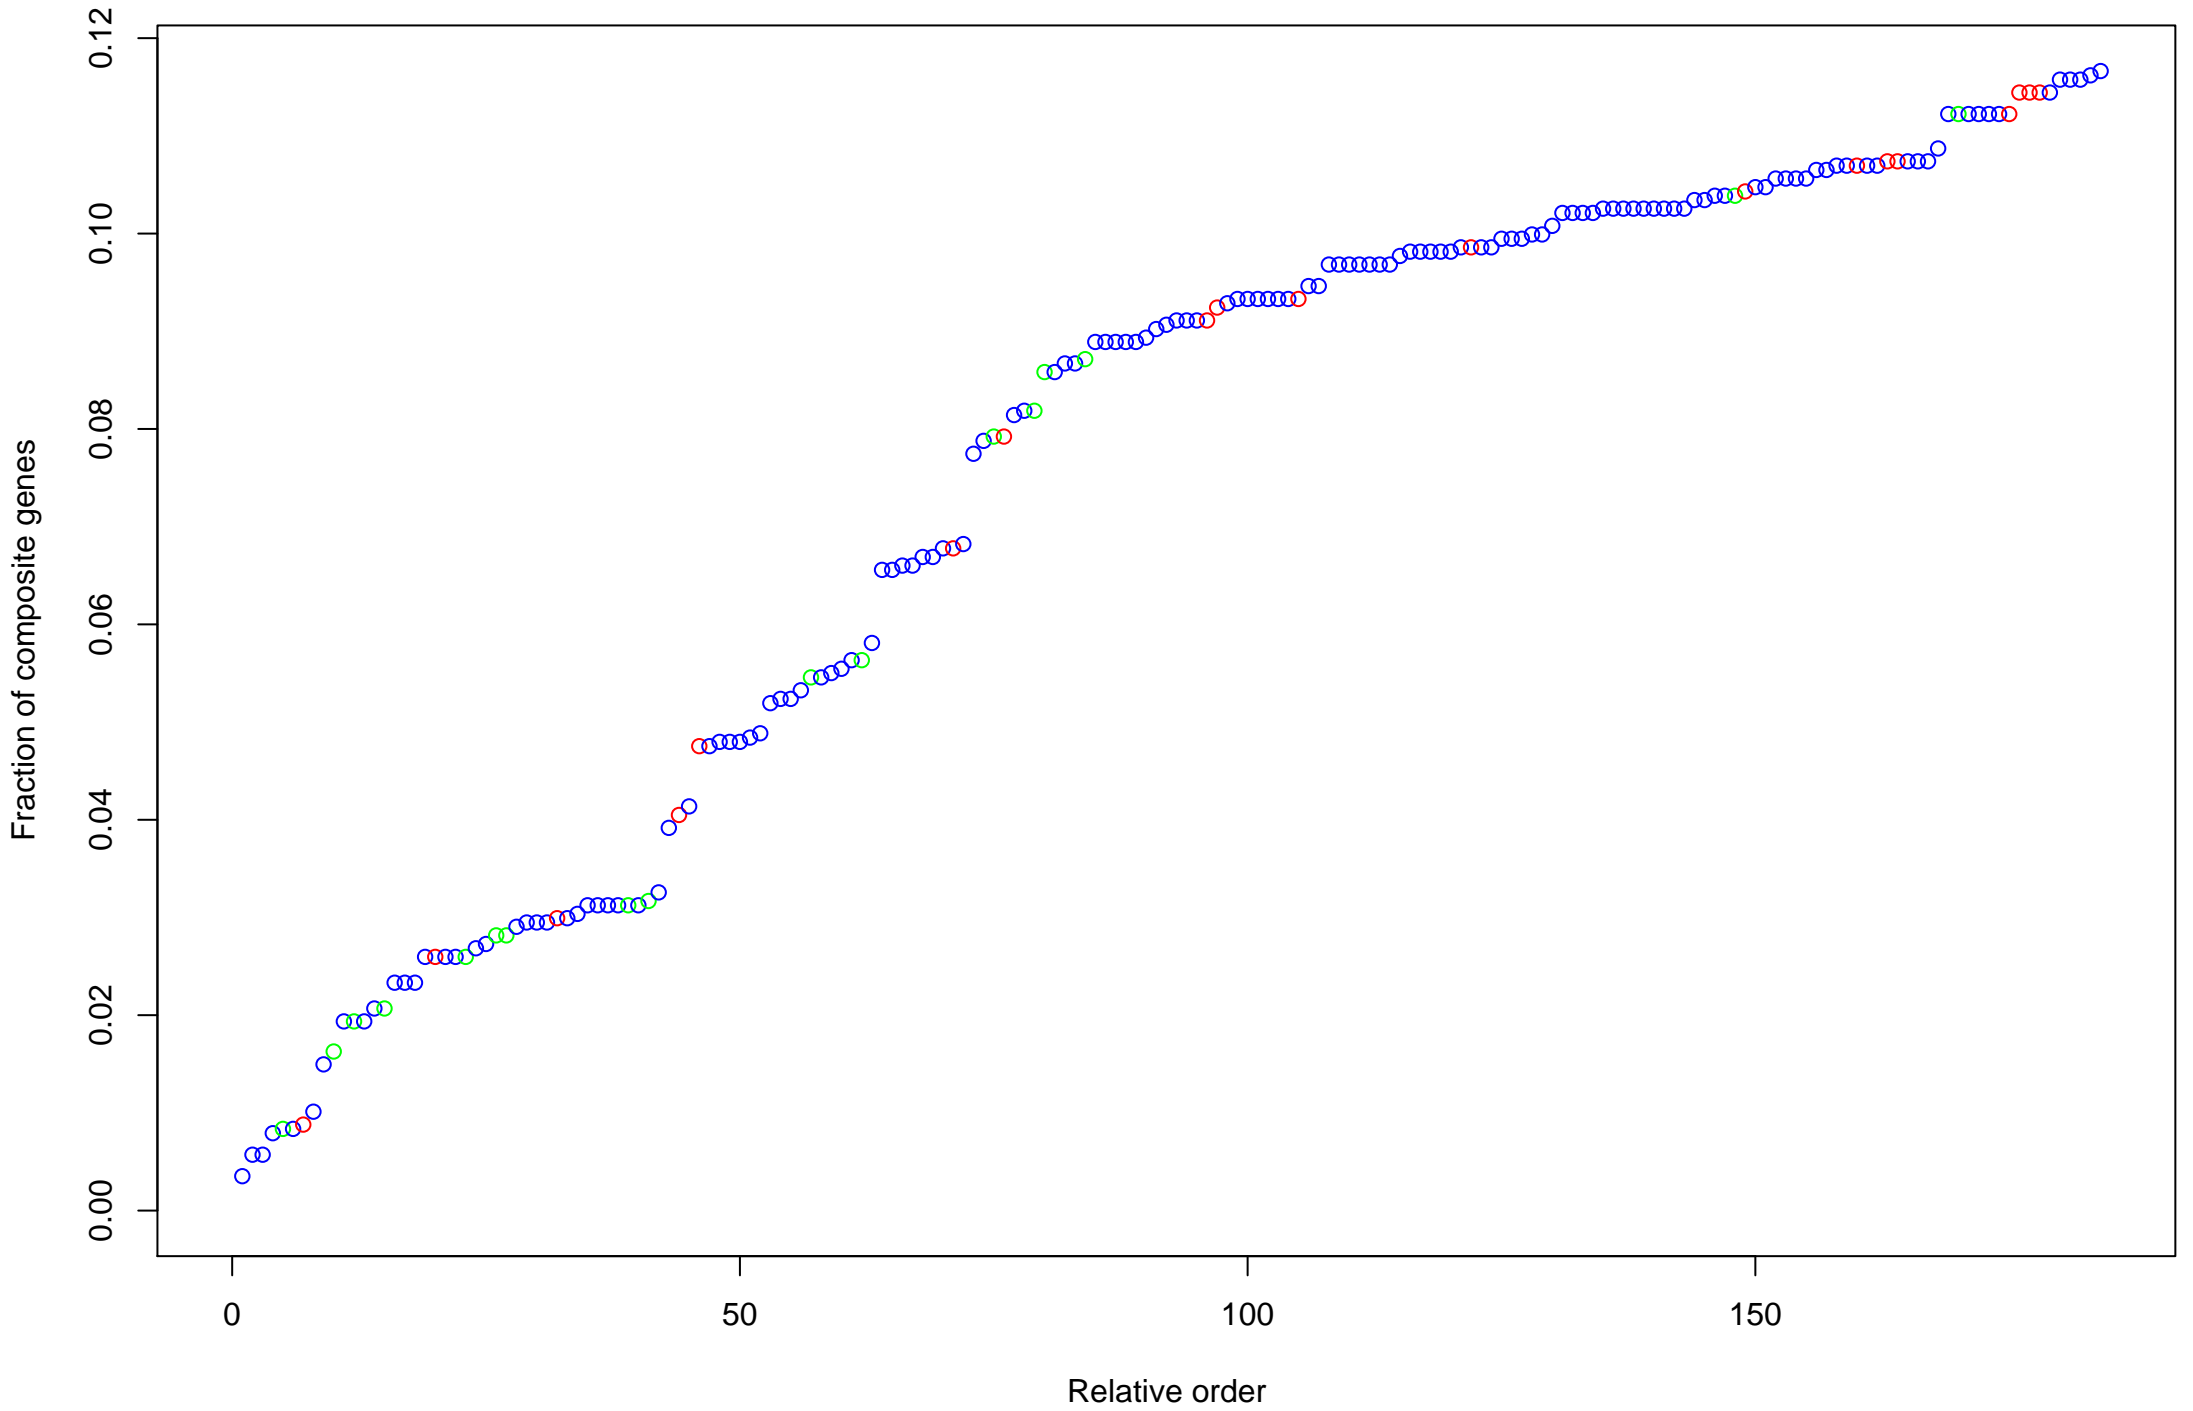

# CBRI-XXX-01 (*Caenorhabditis briggsae*)

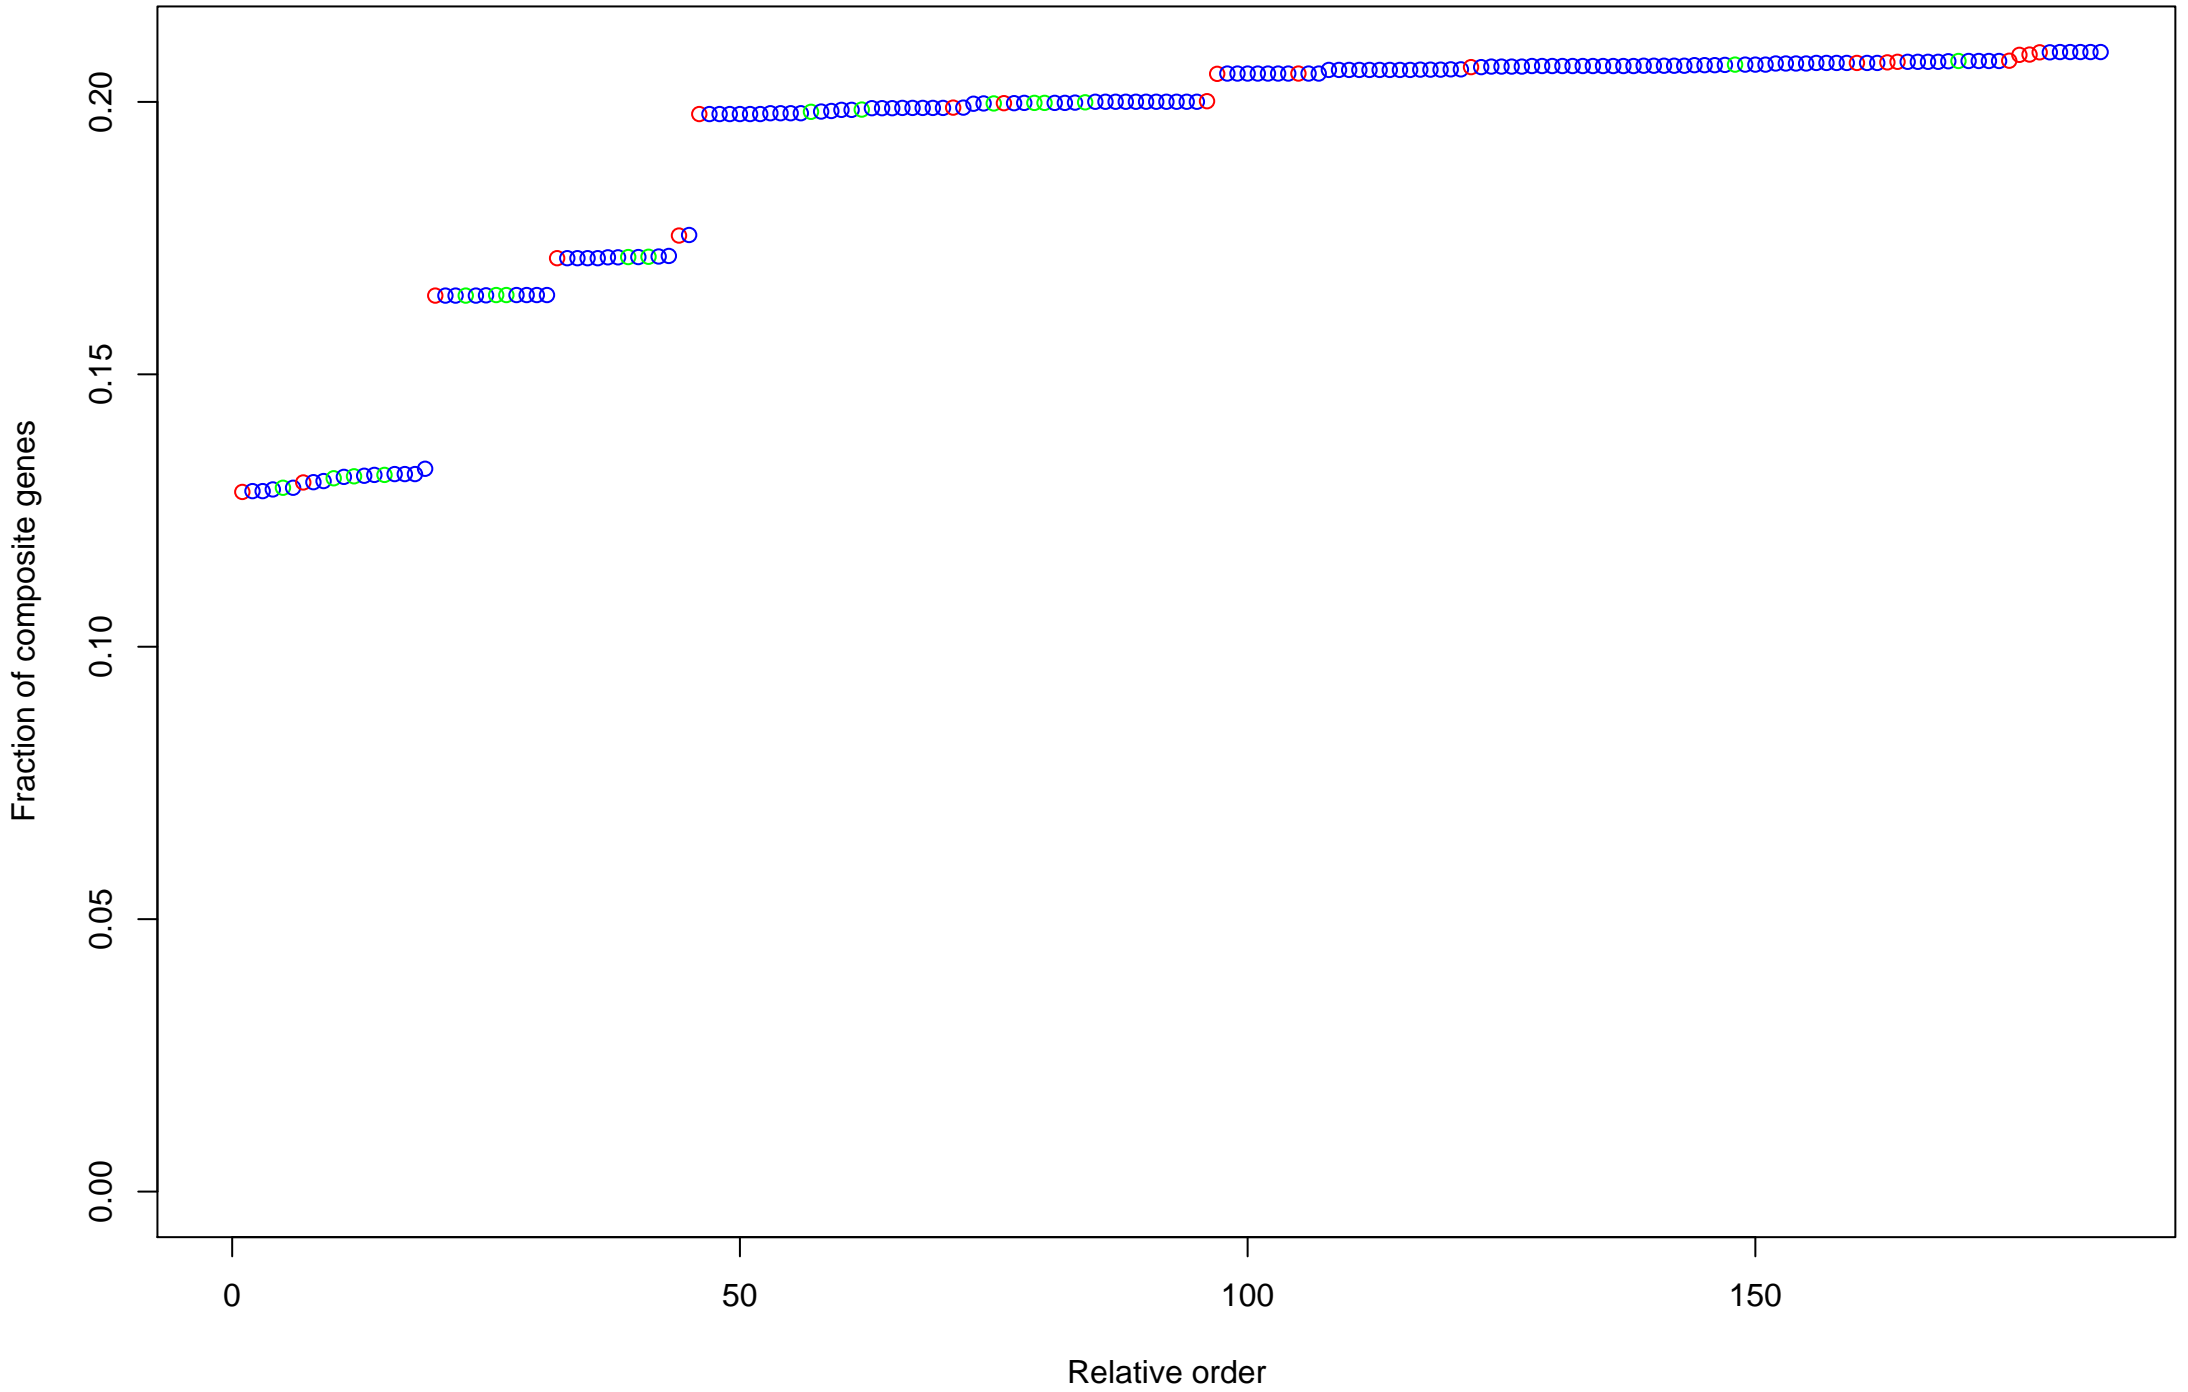

# VVUL-YJ0-01 (*Vibrio vulnificus*)

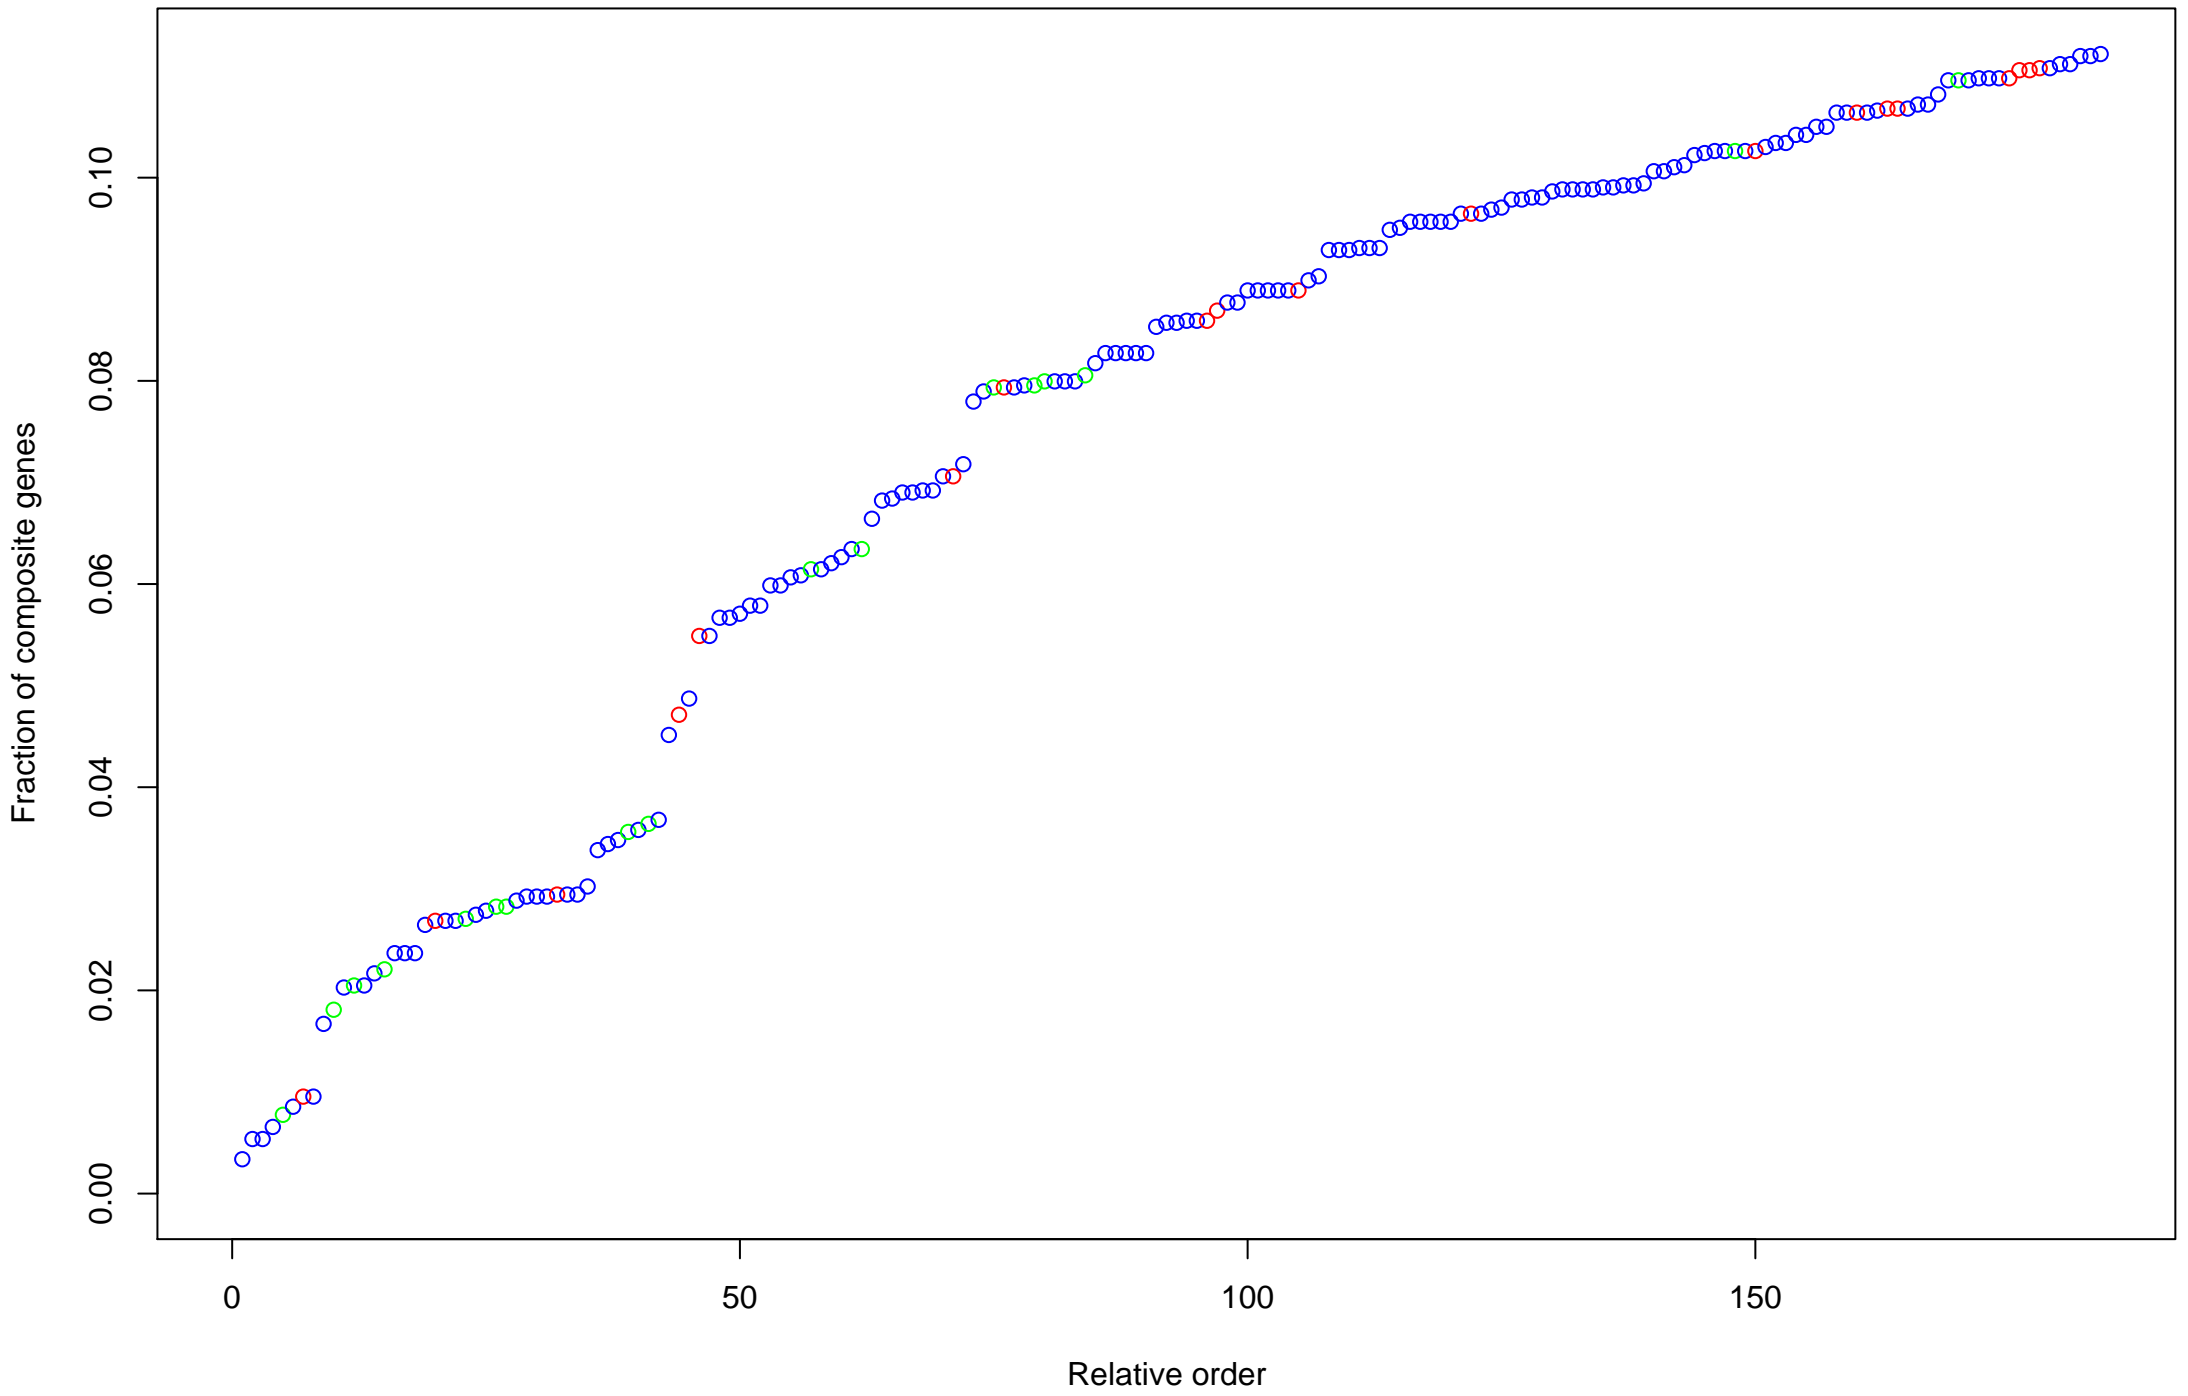

# GSUL-PCA-01 (*Geobacter sulfurreducens*)

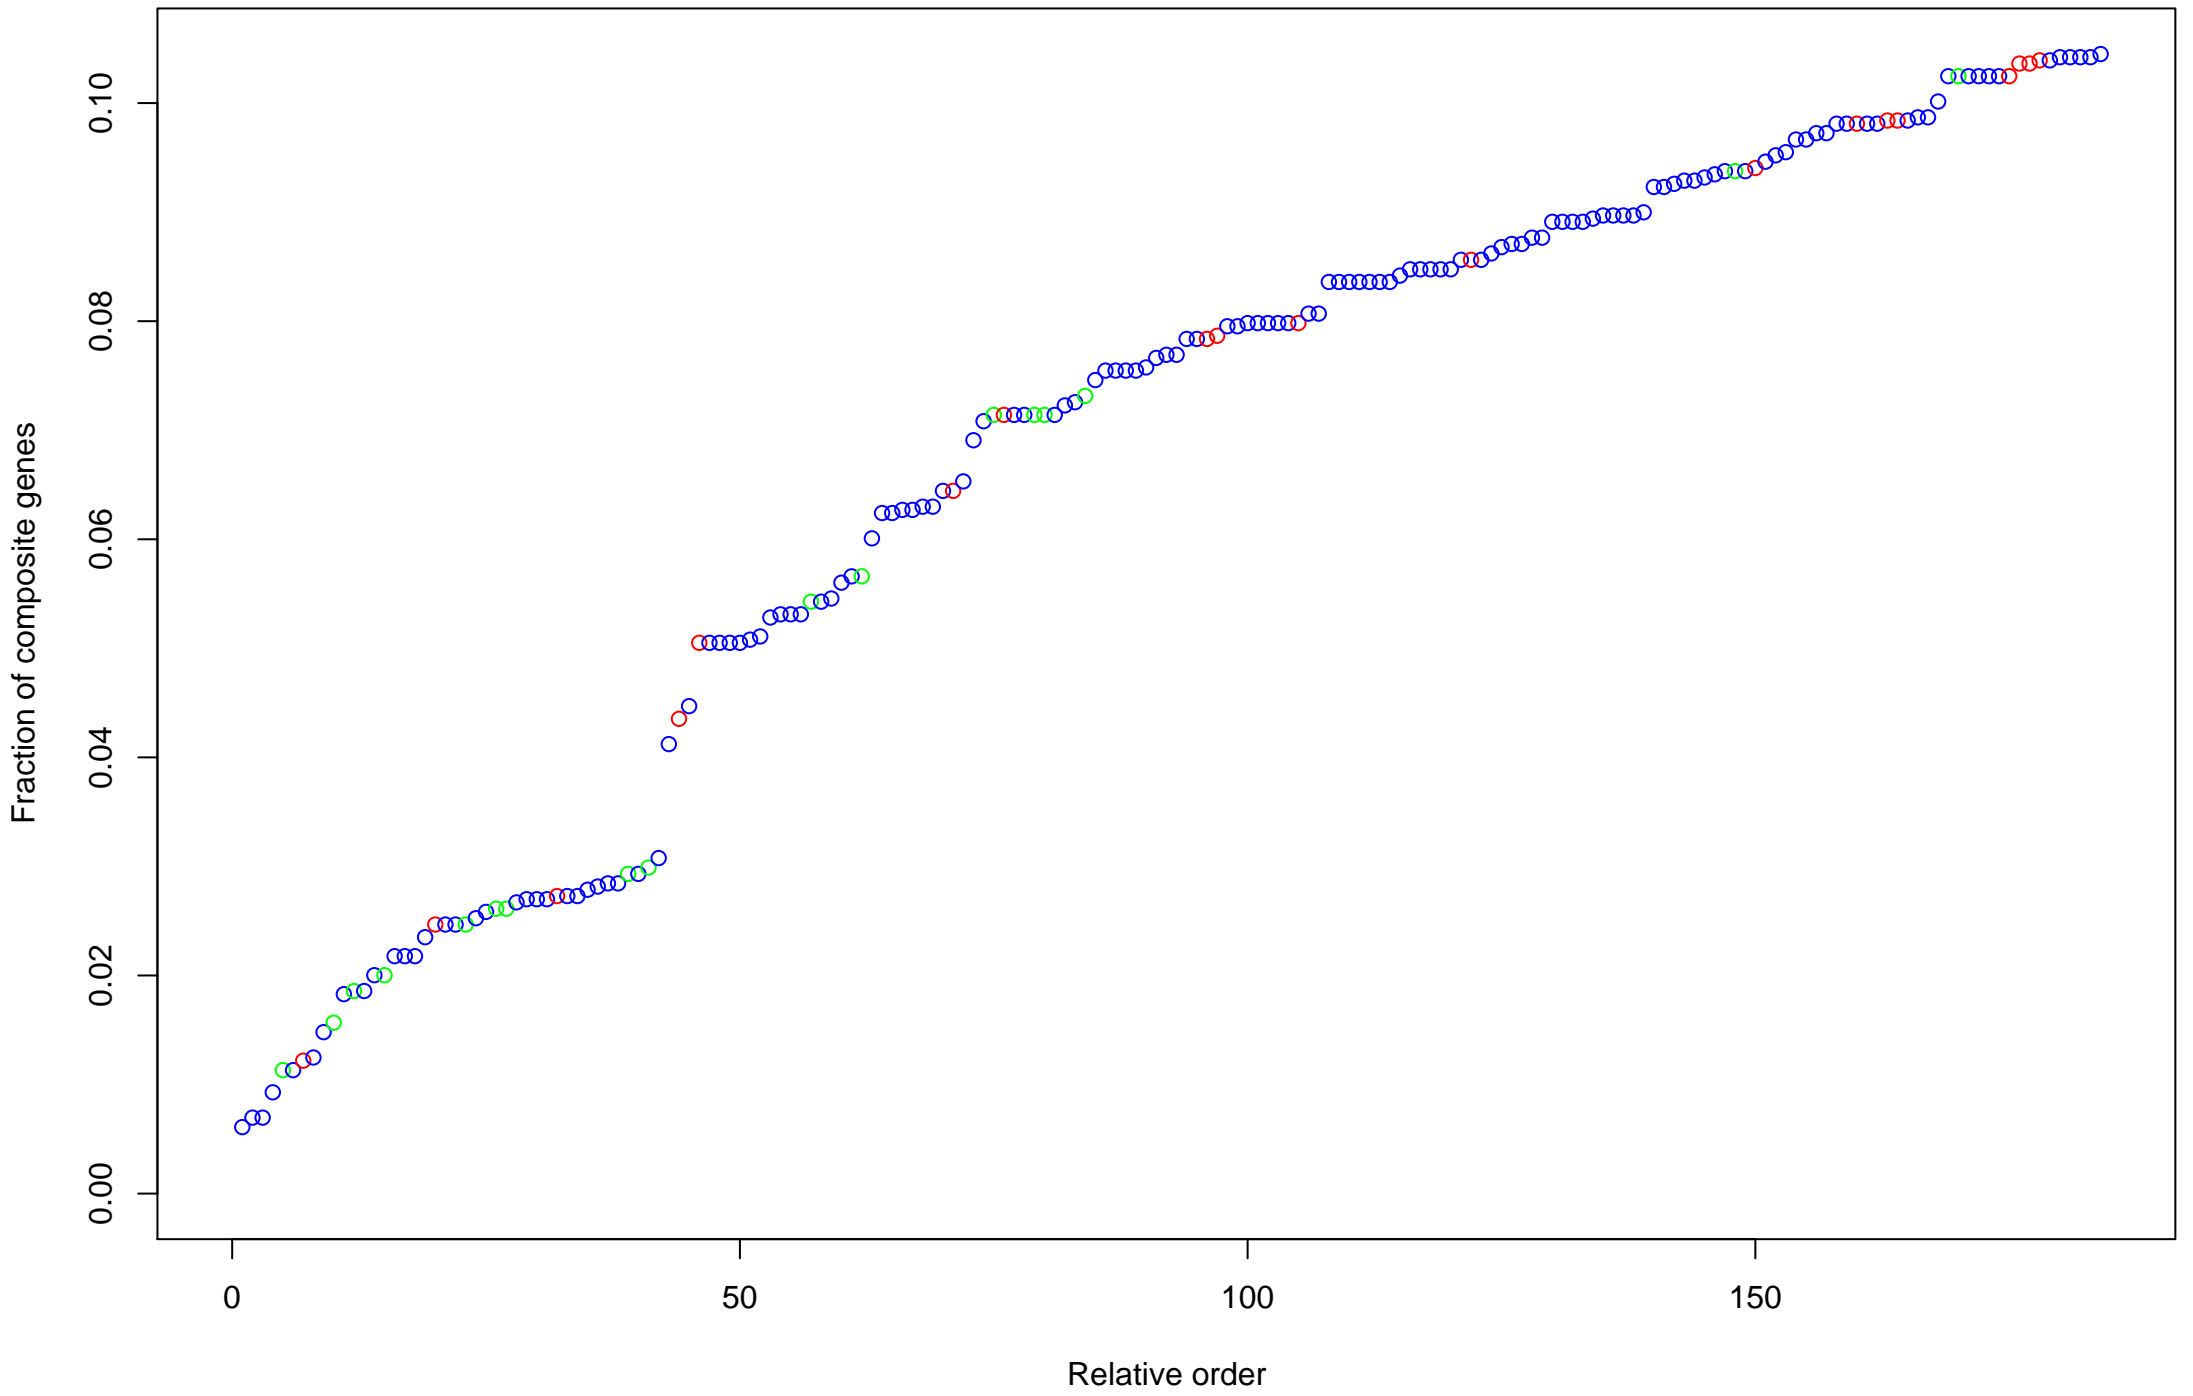

# PAST-XOY-01 (Phytoplasma asteris)

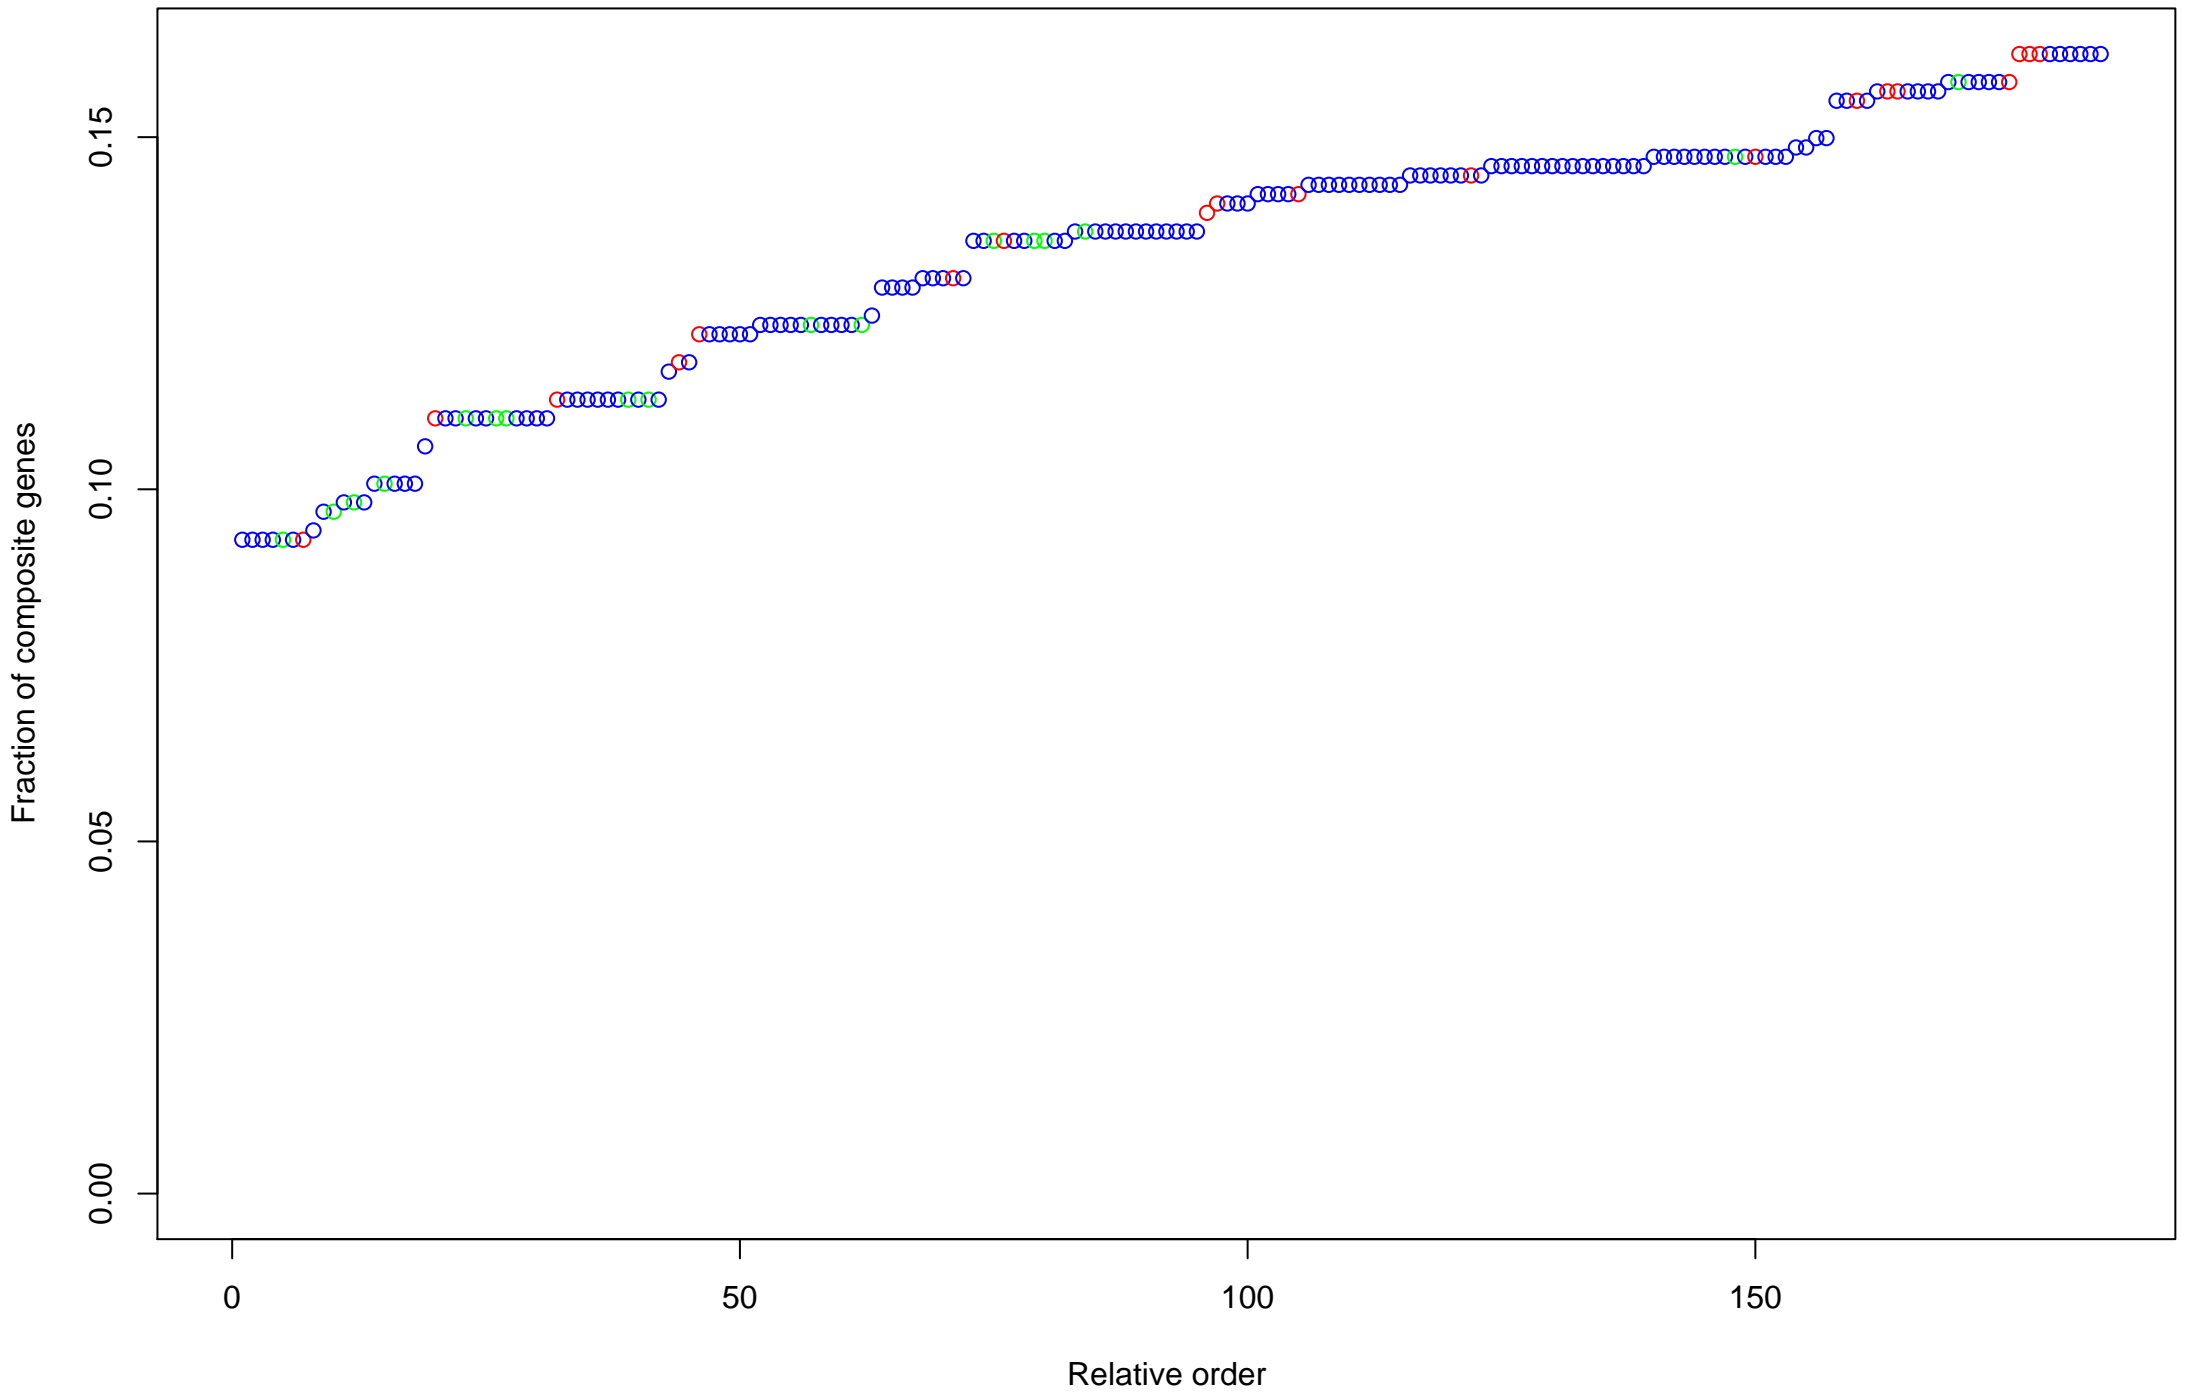



# RPAL-009-01 (*Rhodopseudomonas palustris*)

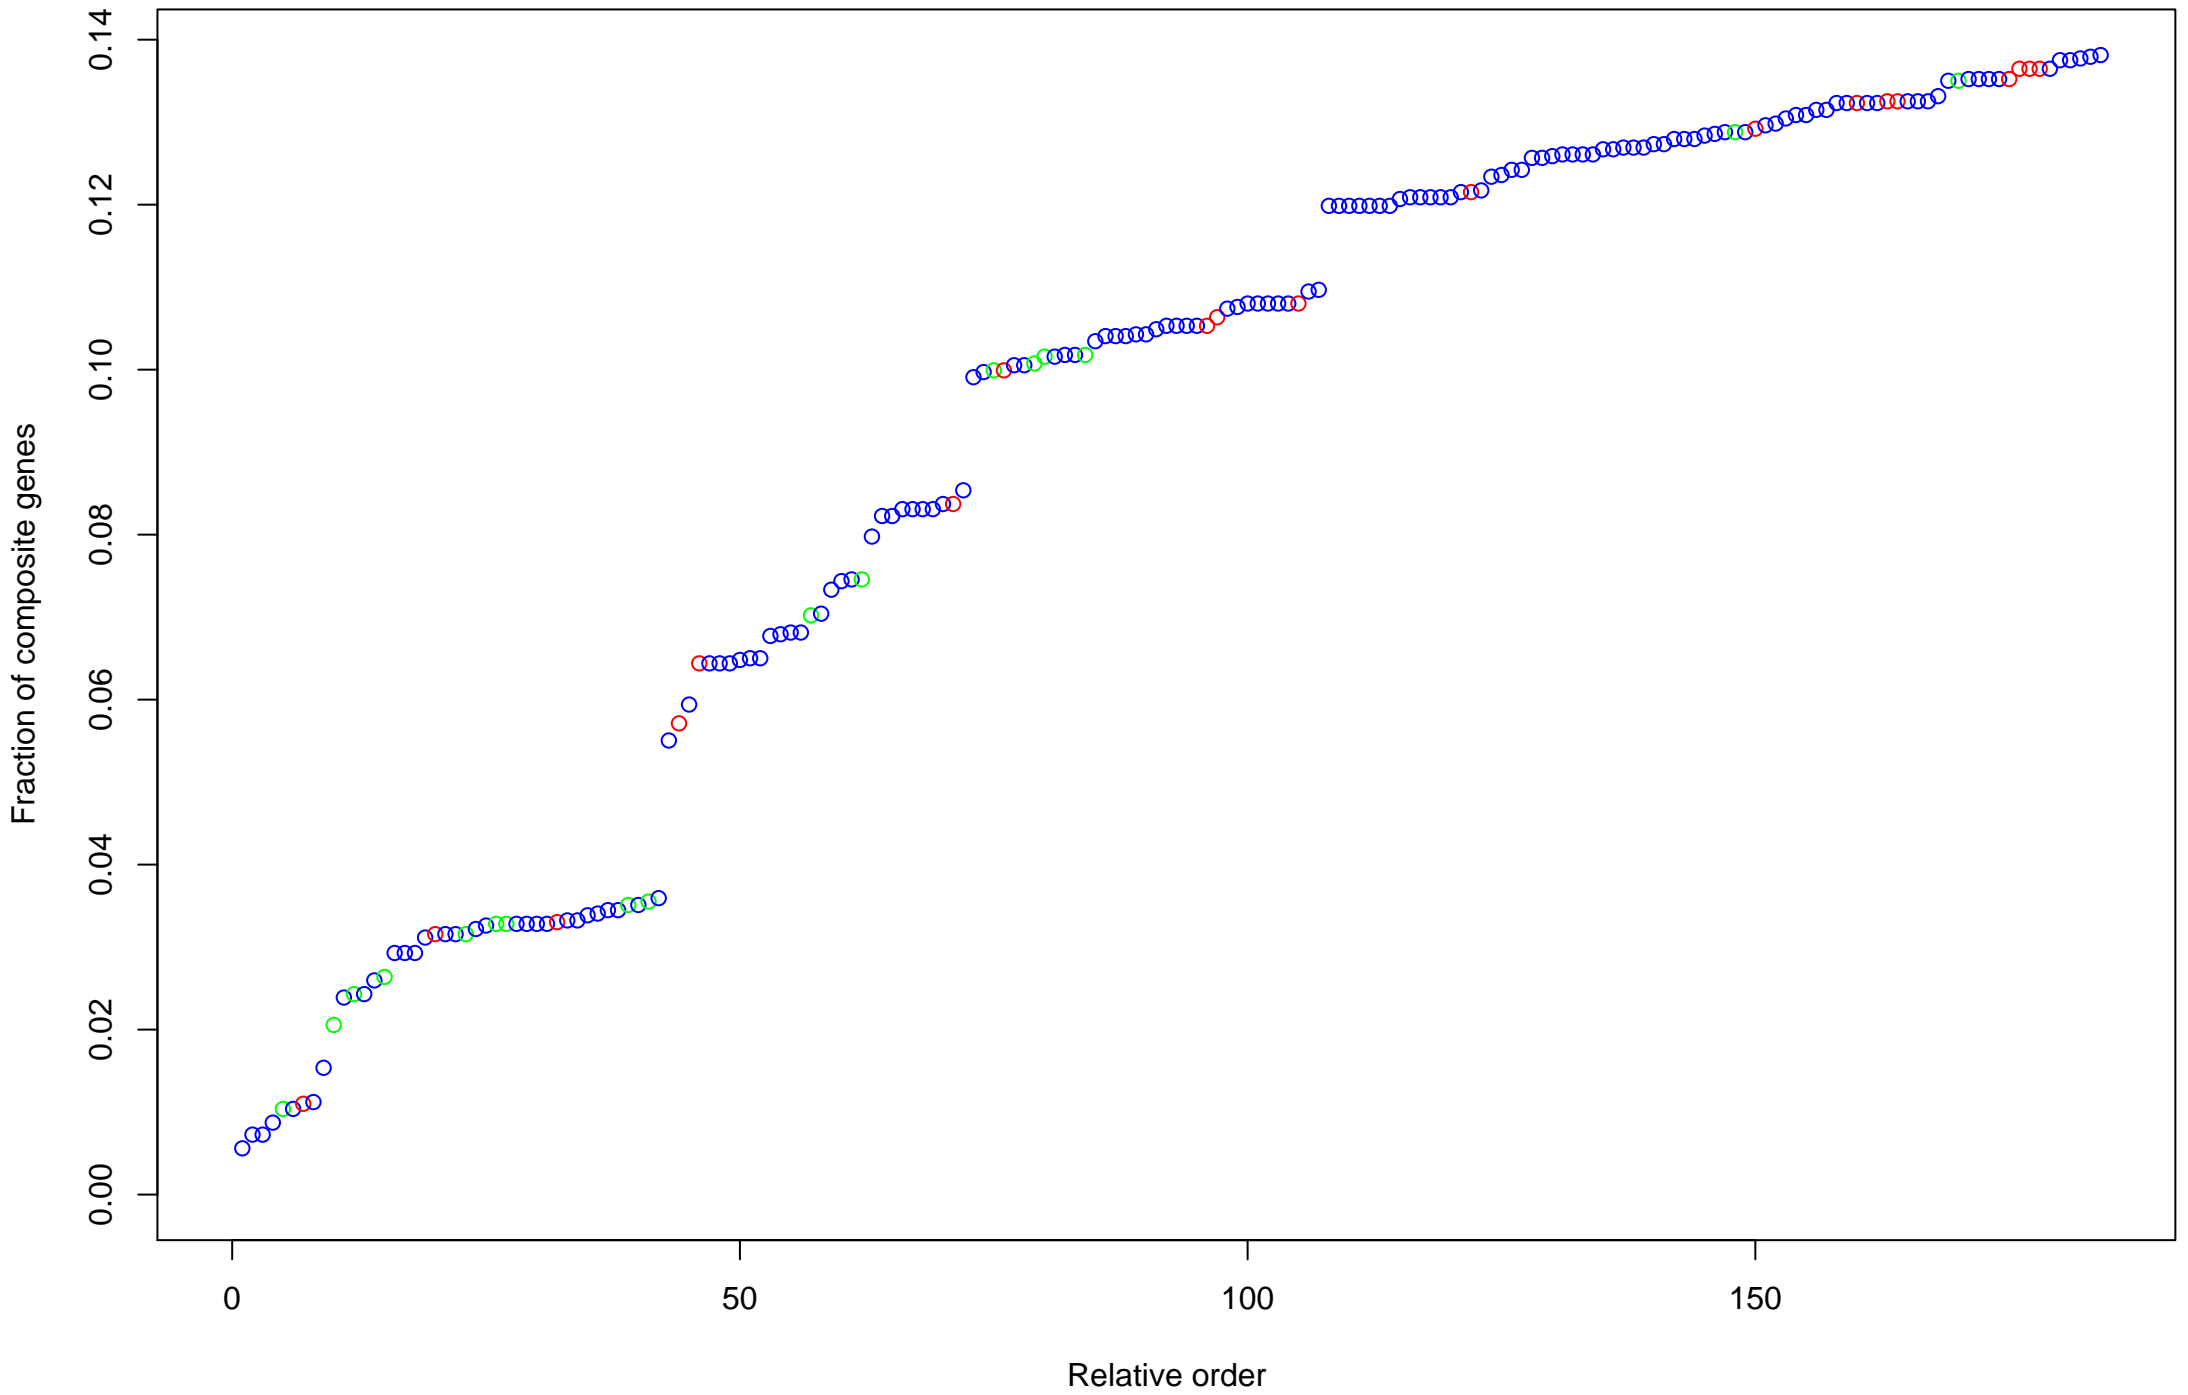

# BBAC-100-01 (*Bdellovibrio bacteriovorus*)

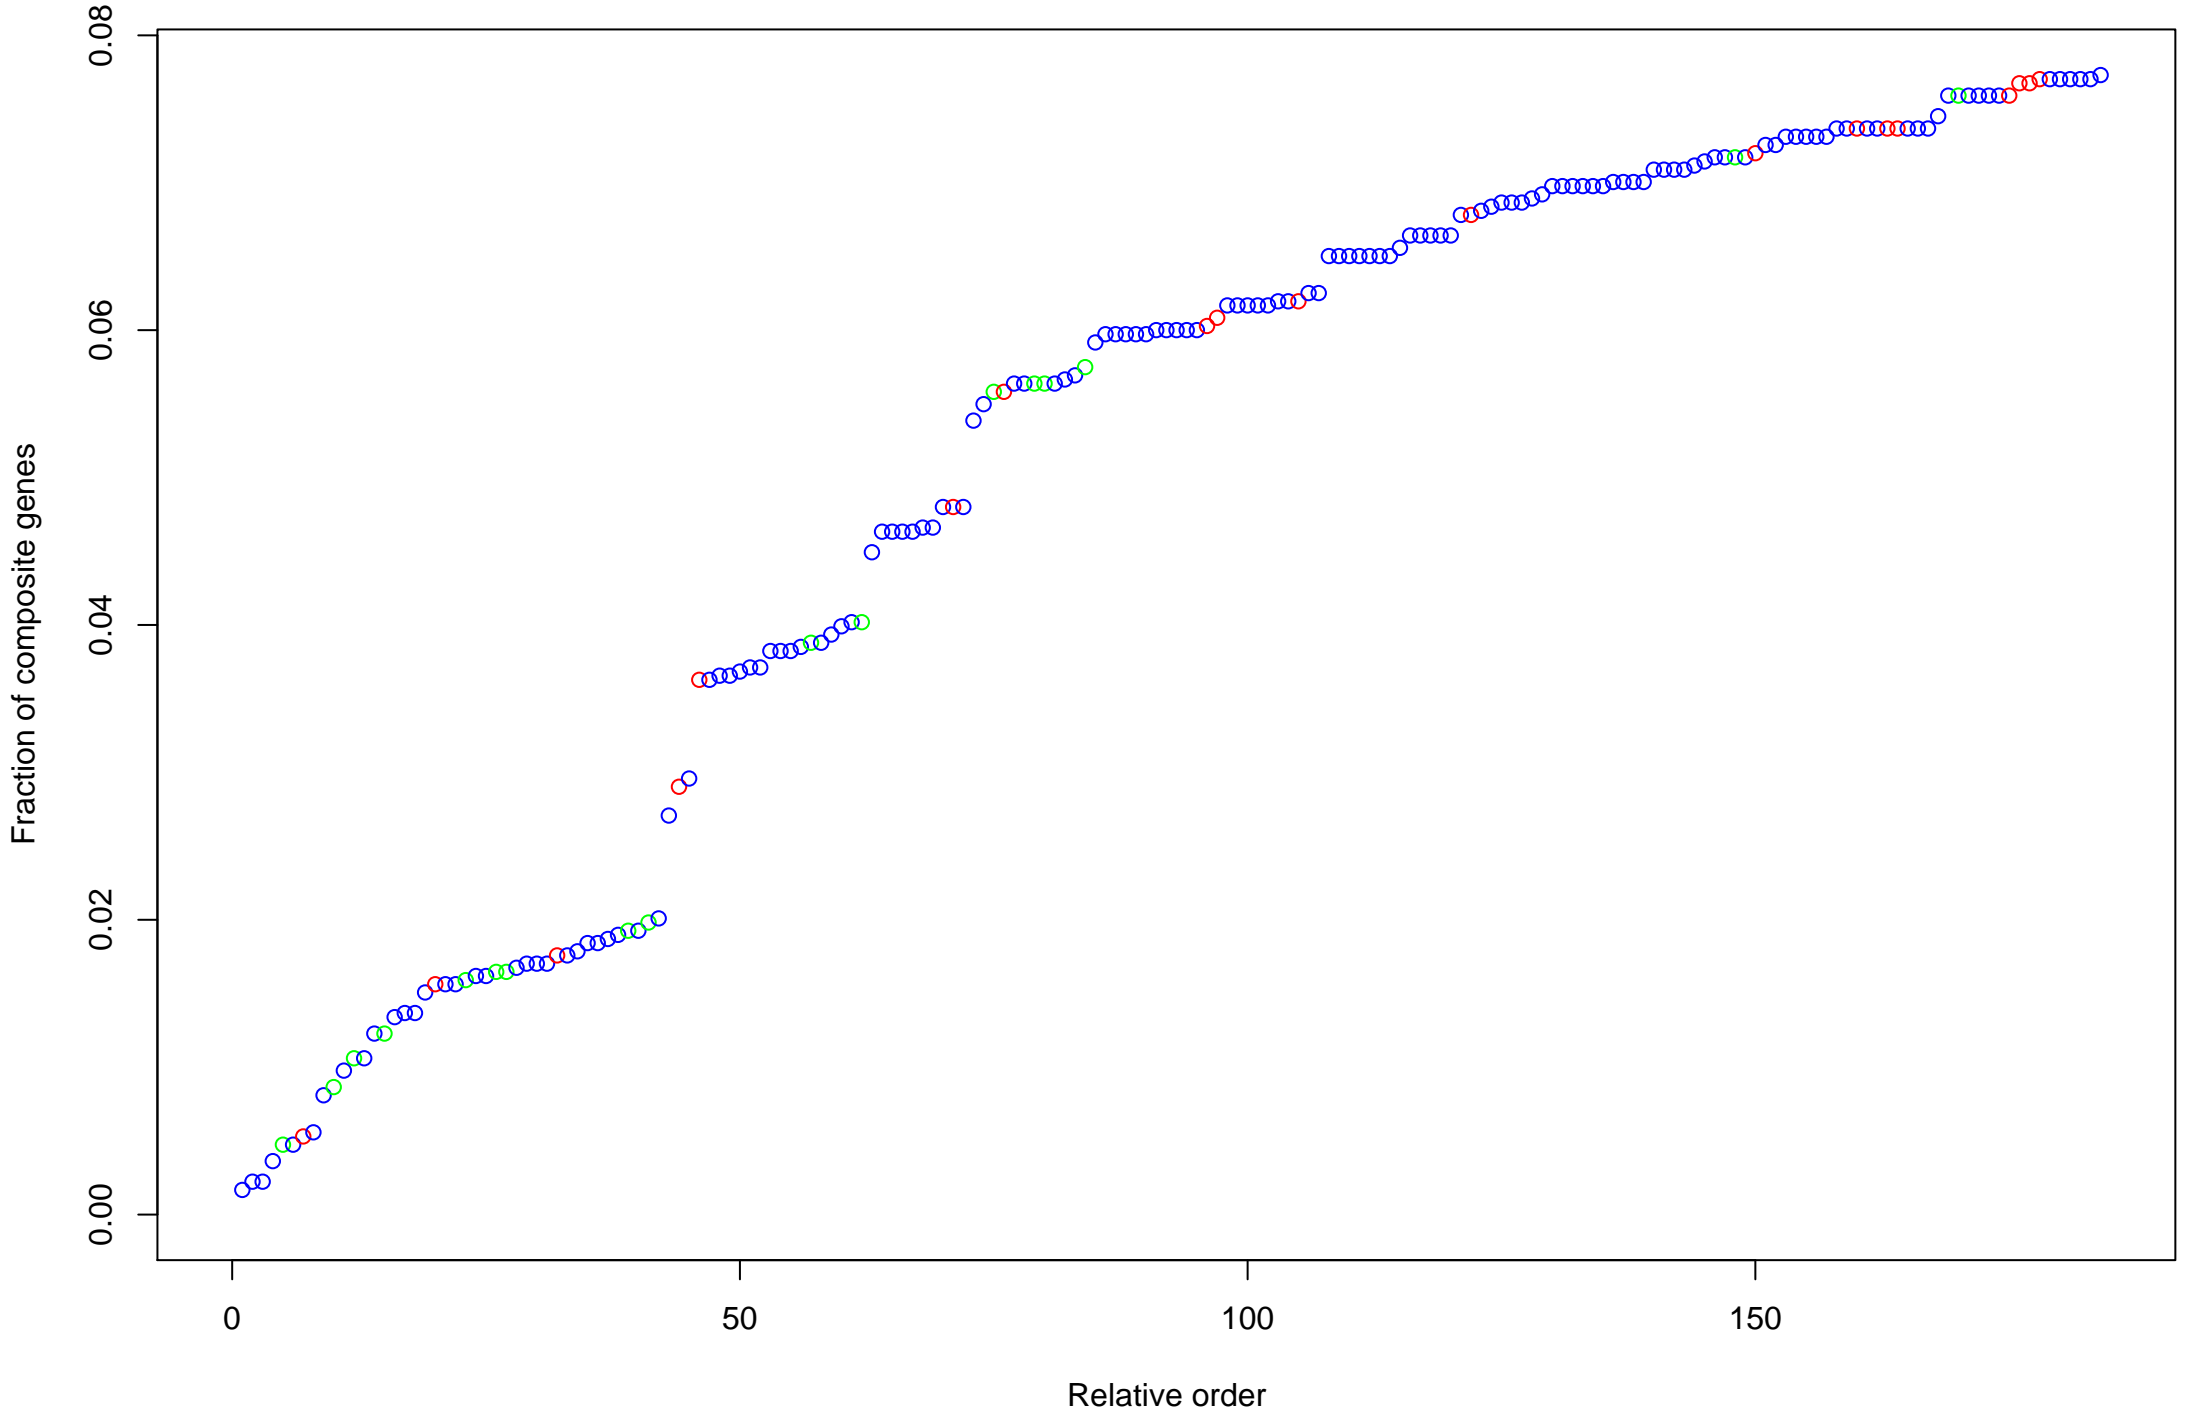

# MMYC-G1T-01 (*Mycoplasma mycoides* subsp. *mycoides* SC)

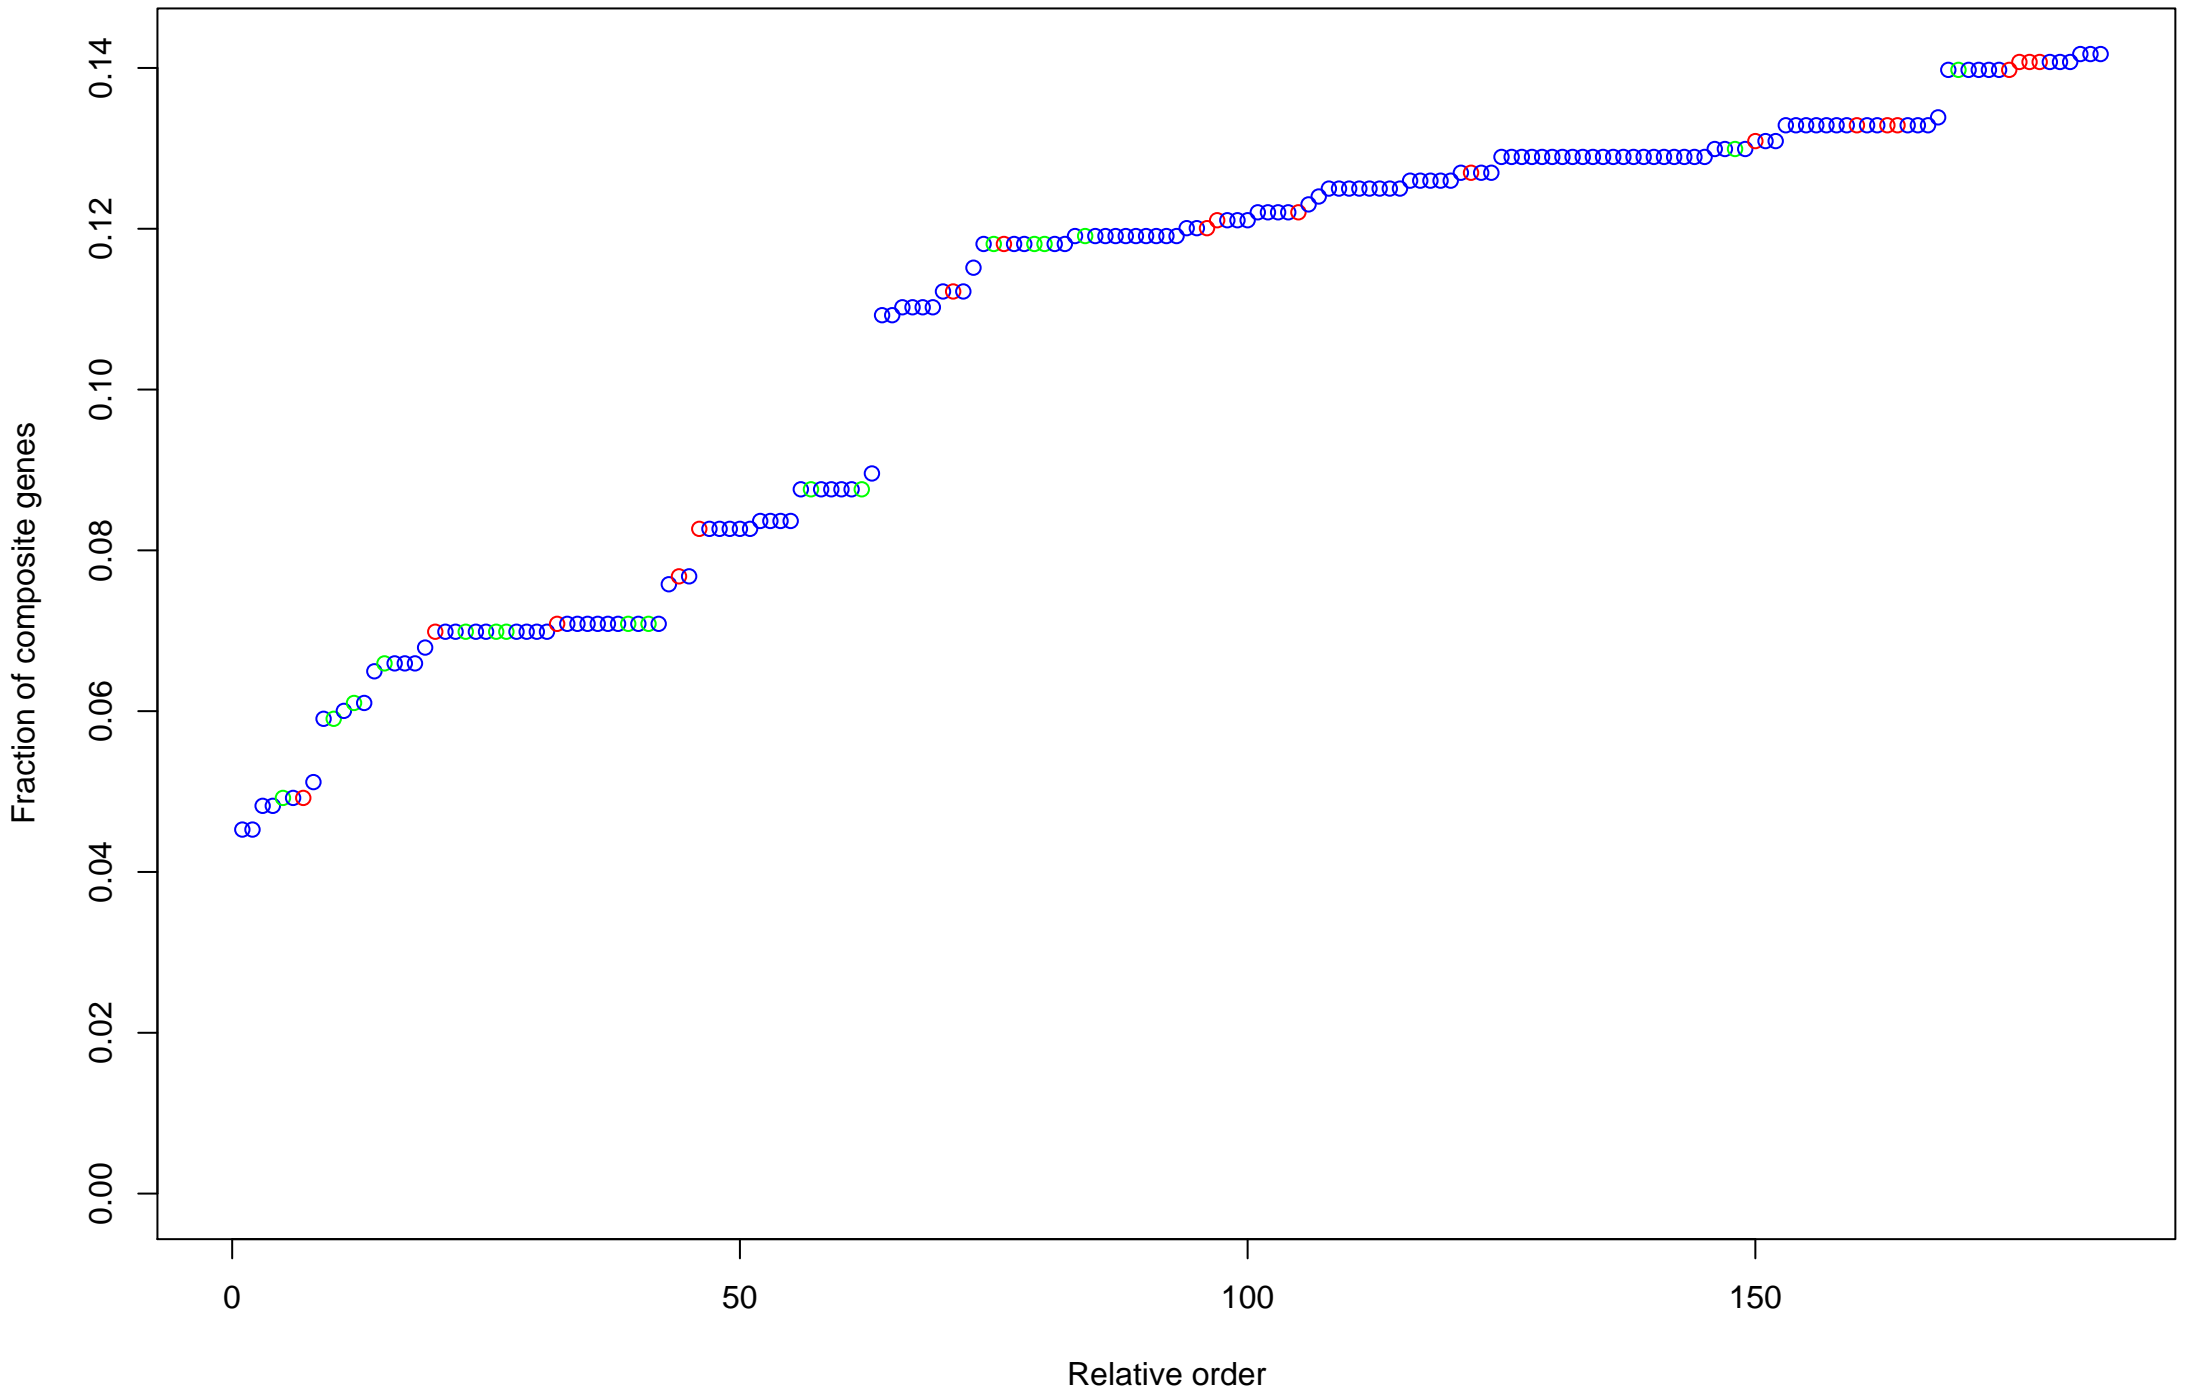

# LJOH-533-01 (*Lactobacillus johnsonii*)

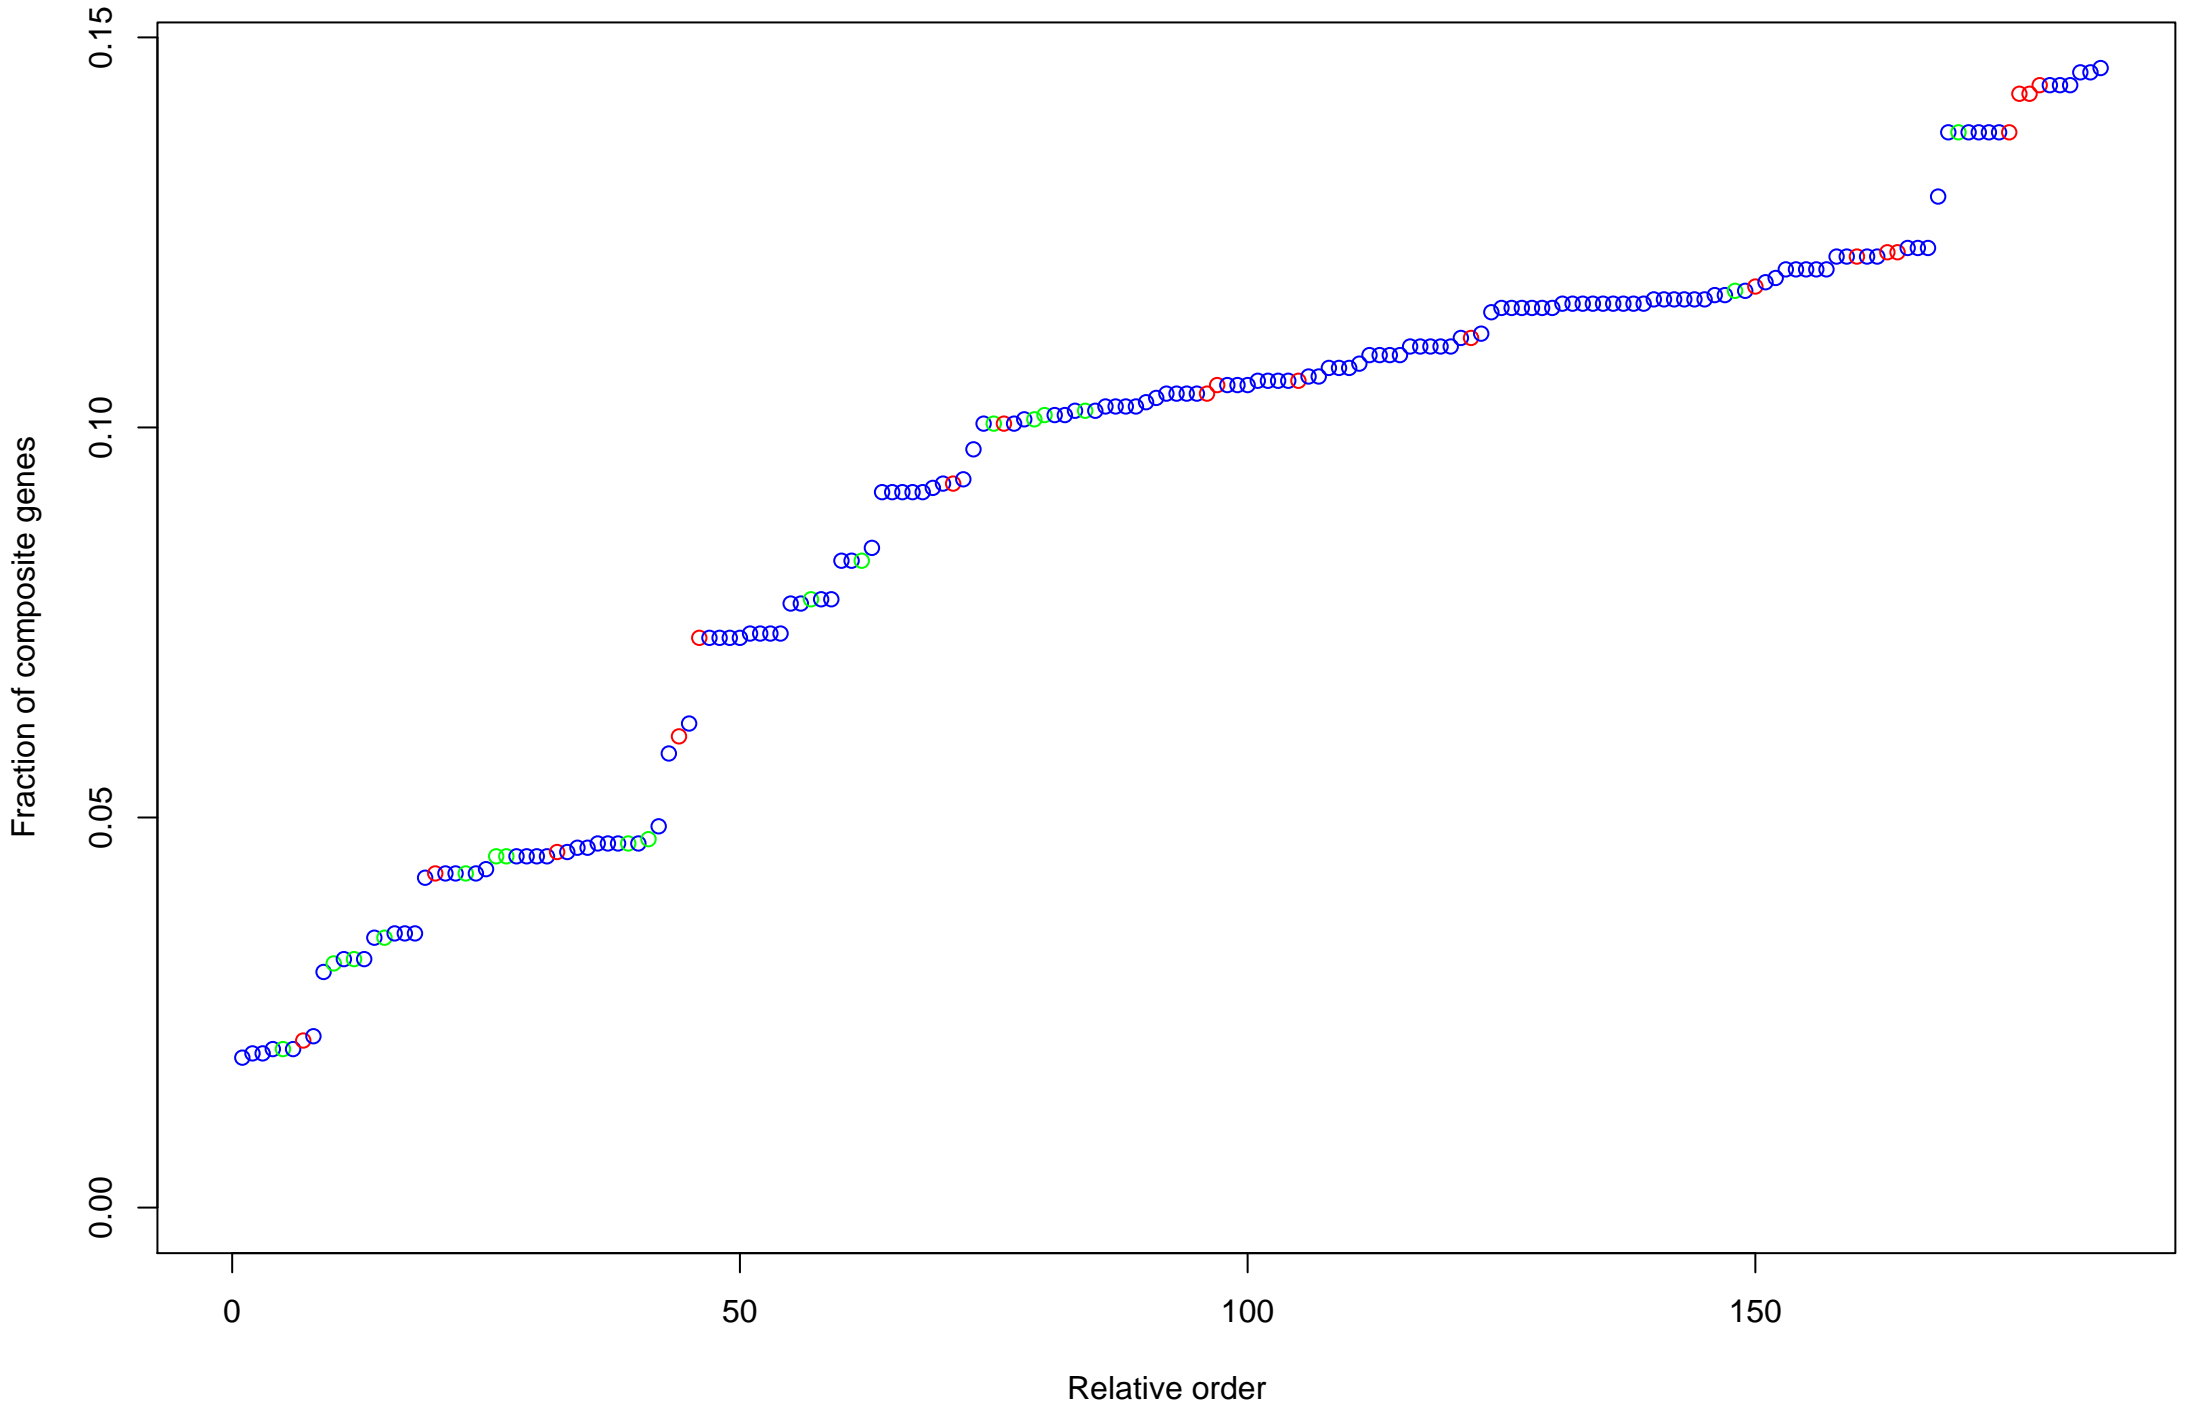

# TDEN-405-01 (*Treponema denticola*)

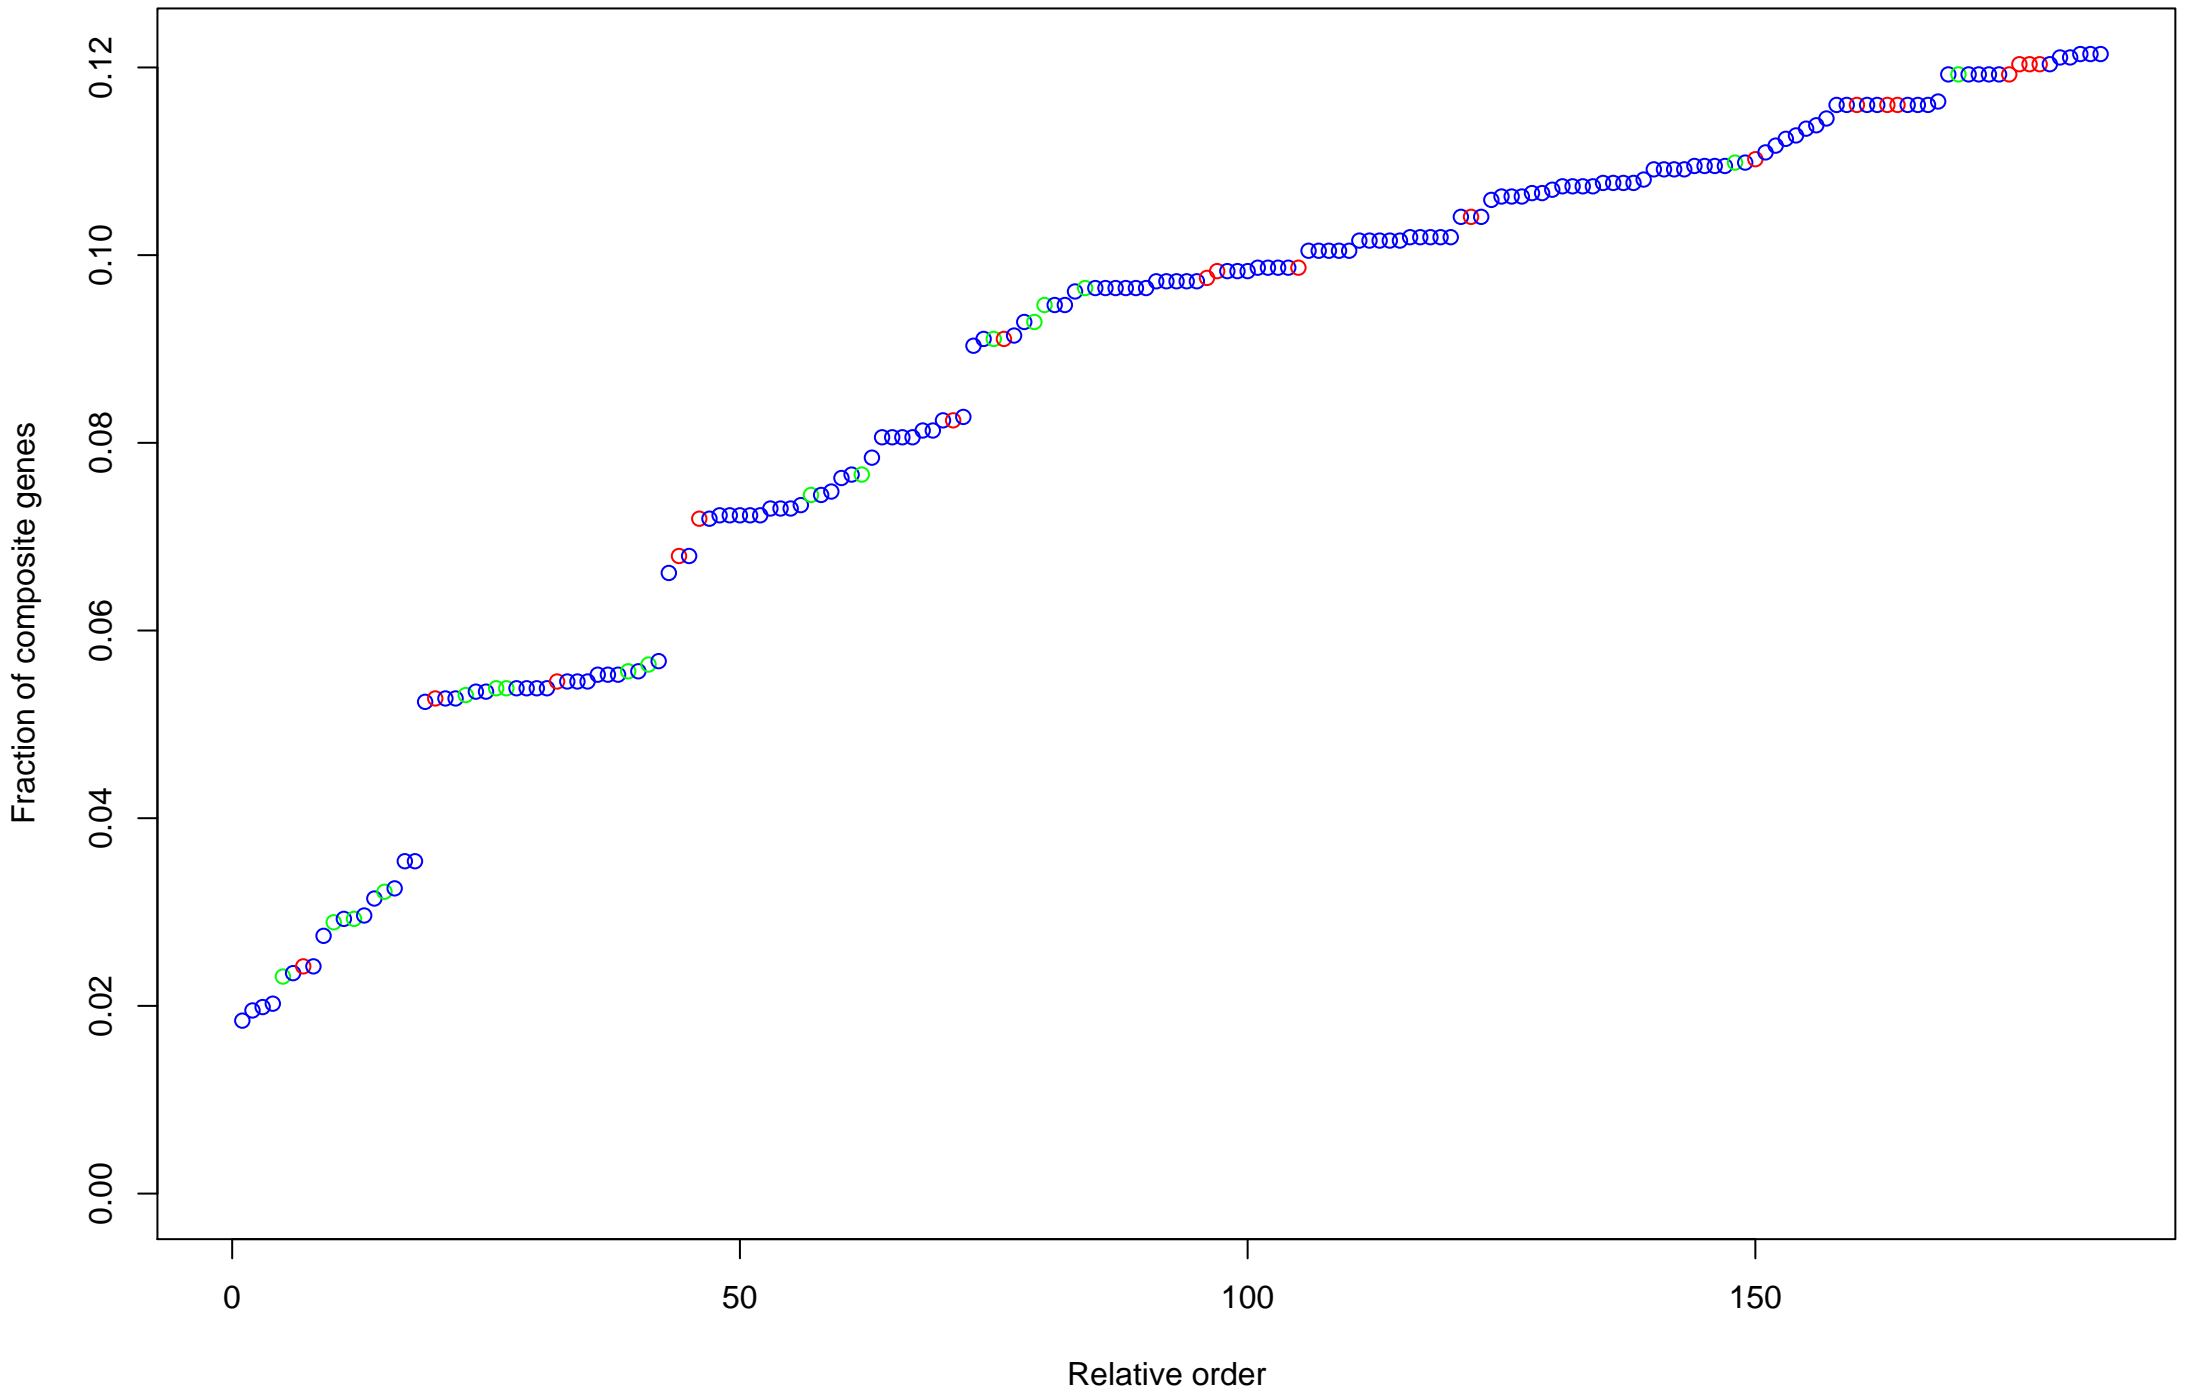

# BCER-987-01 (*Bacillus cereus*)

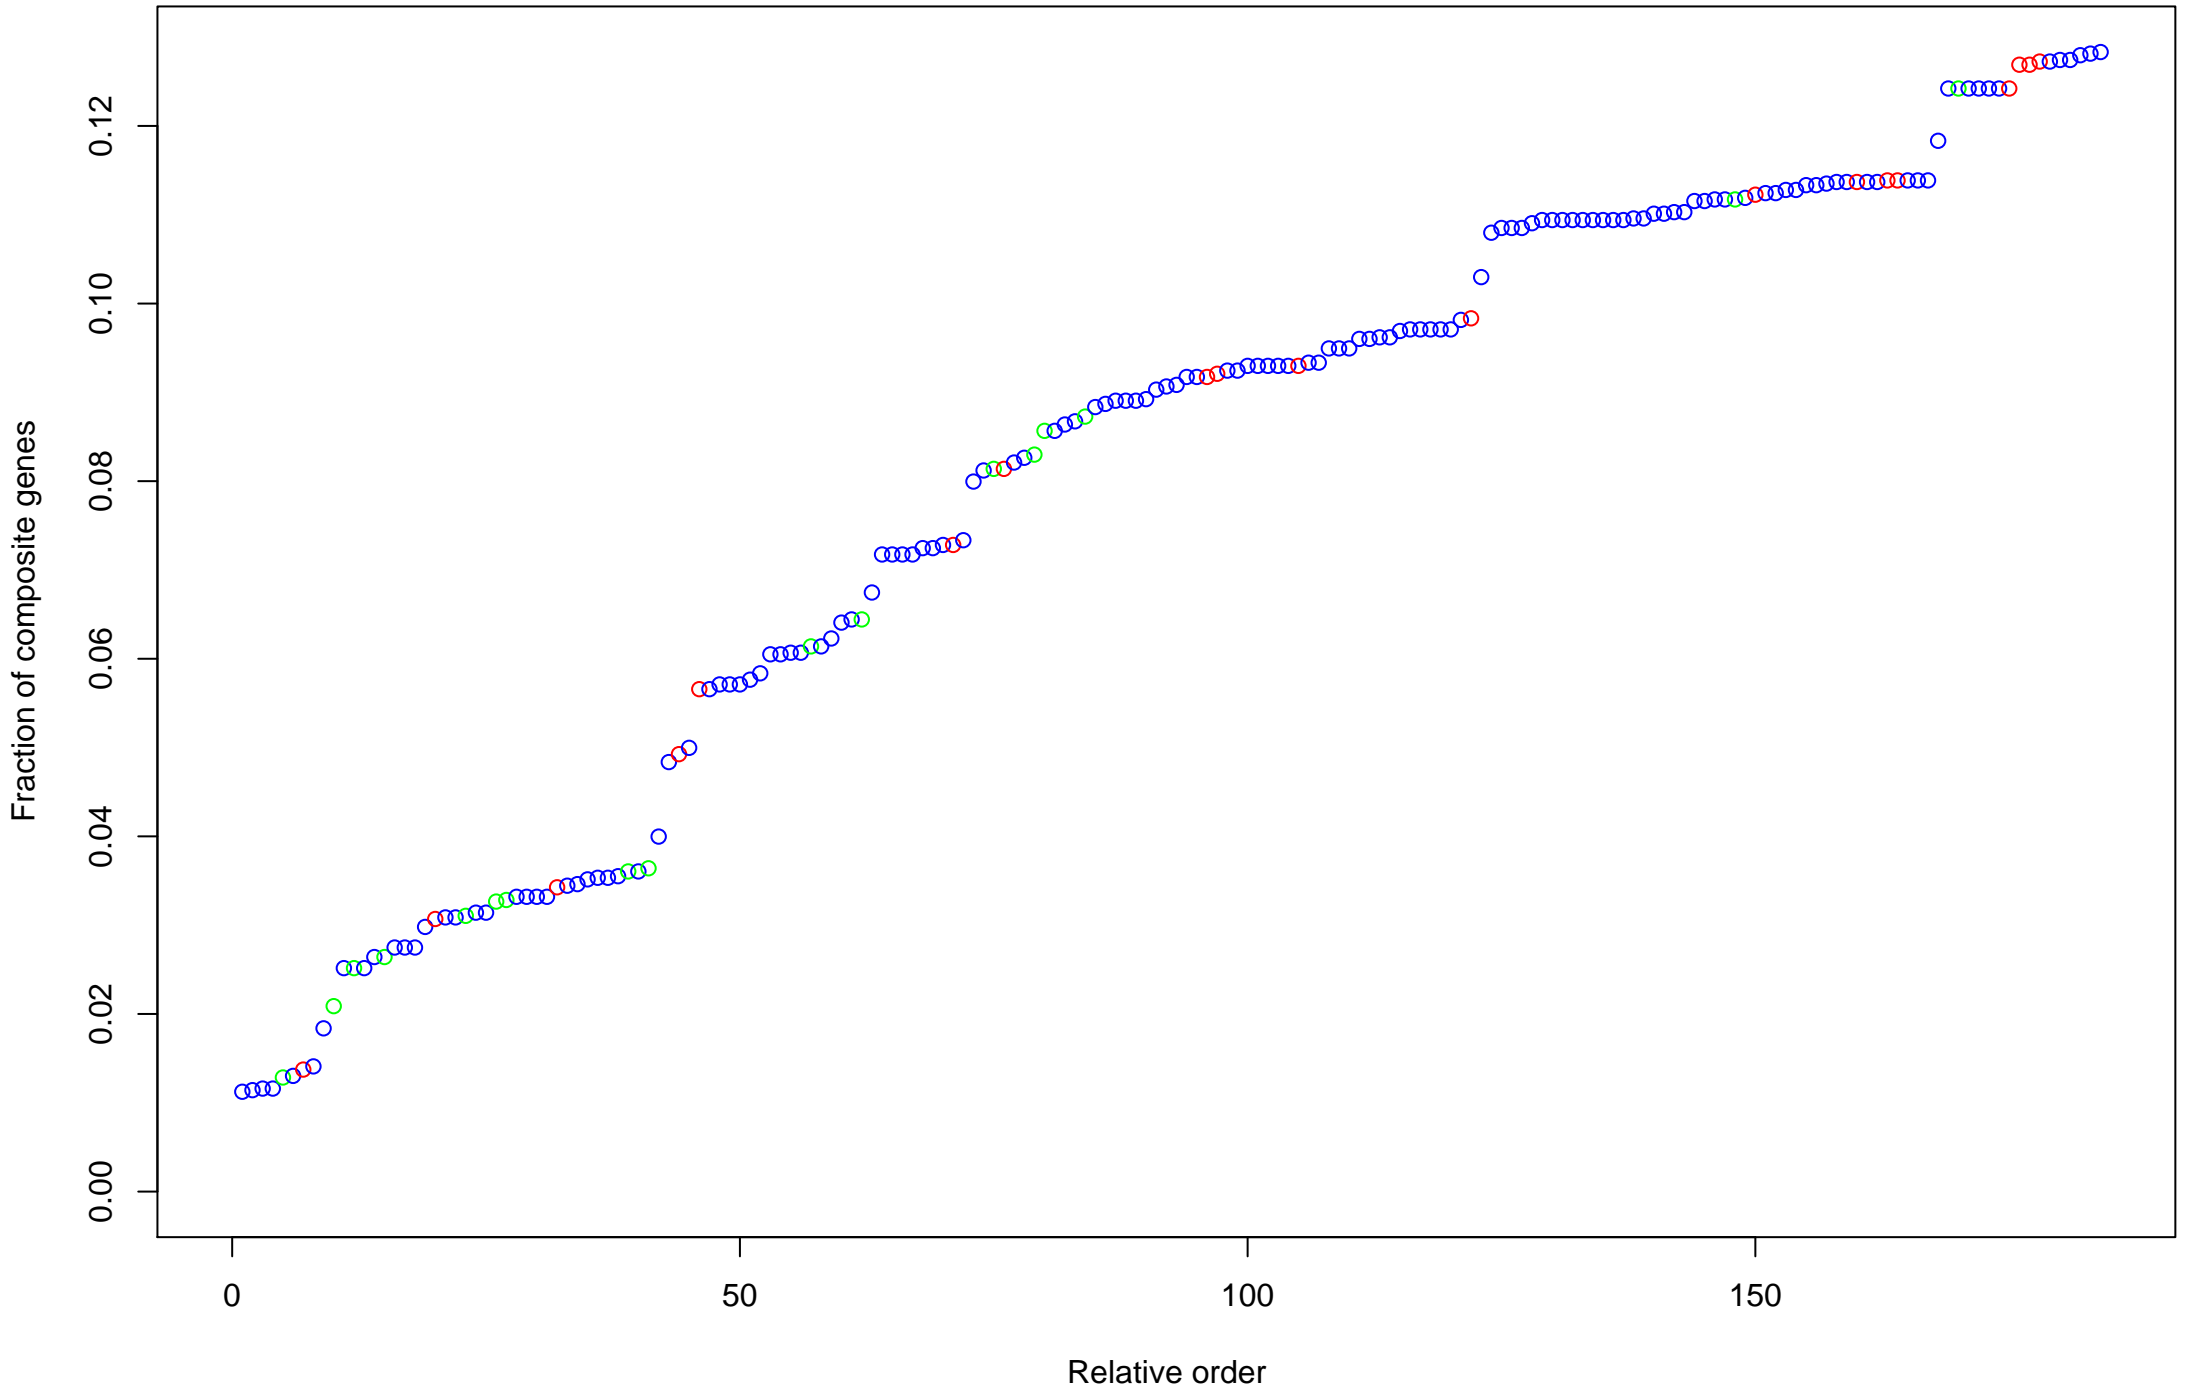

# WPIP-WME-01 (*Wolbachia pipientis*)

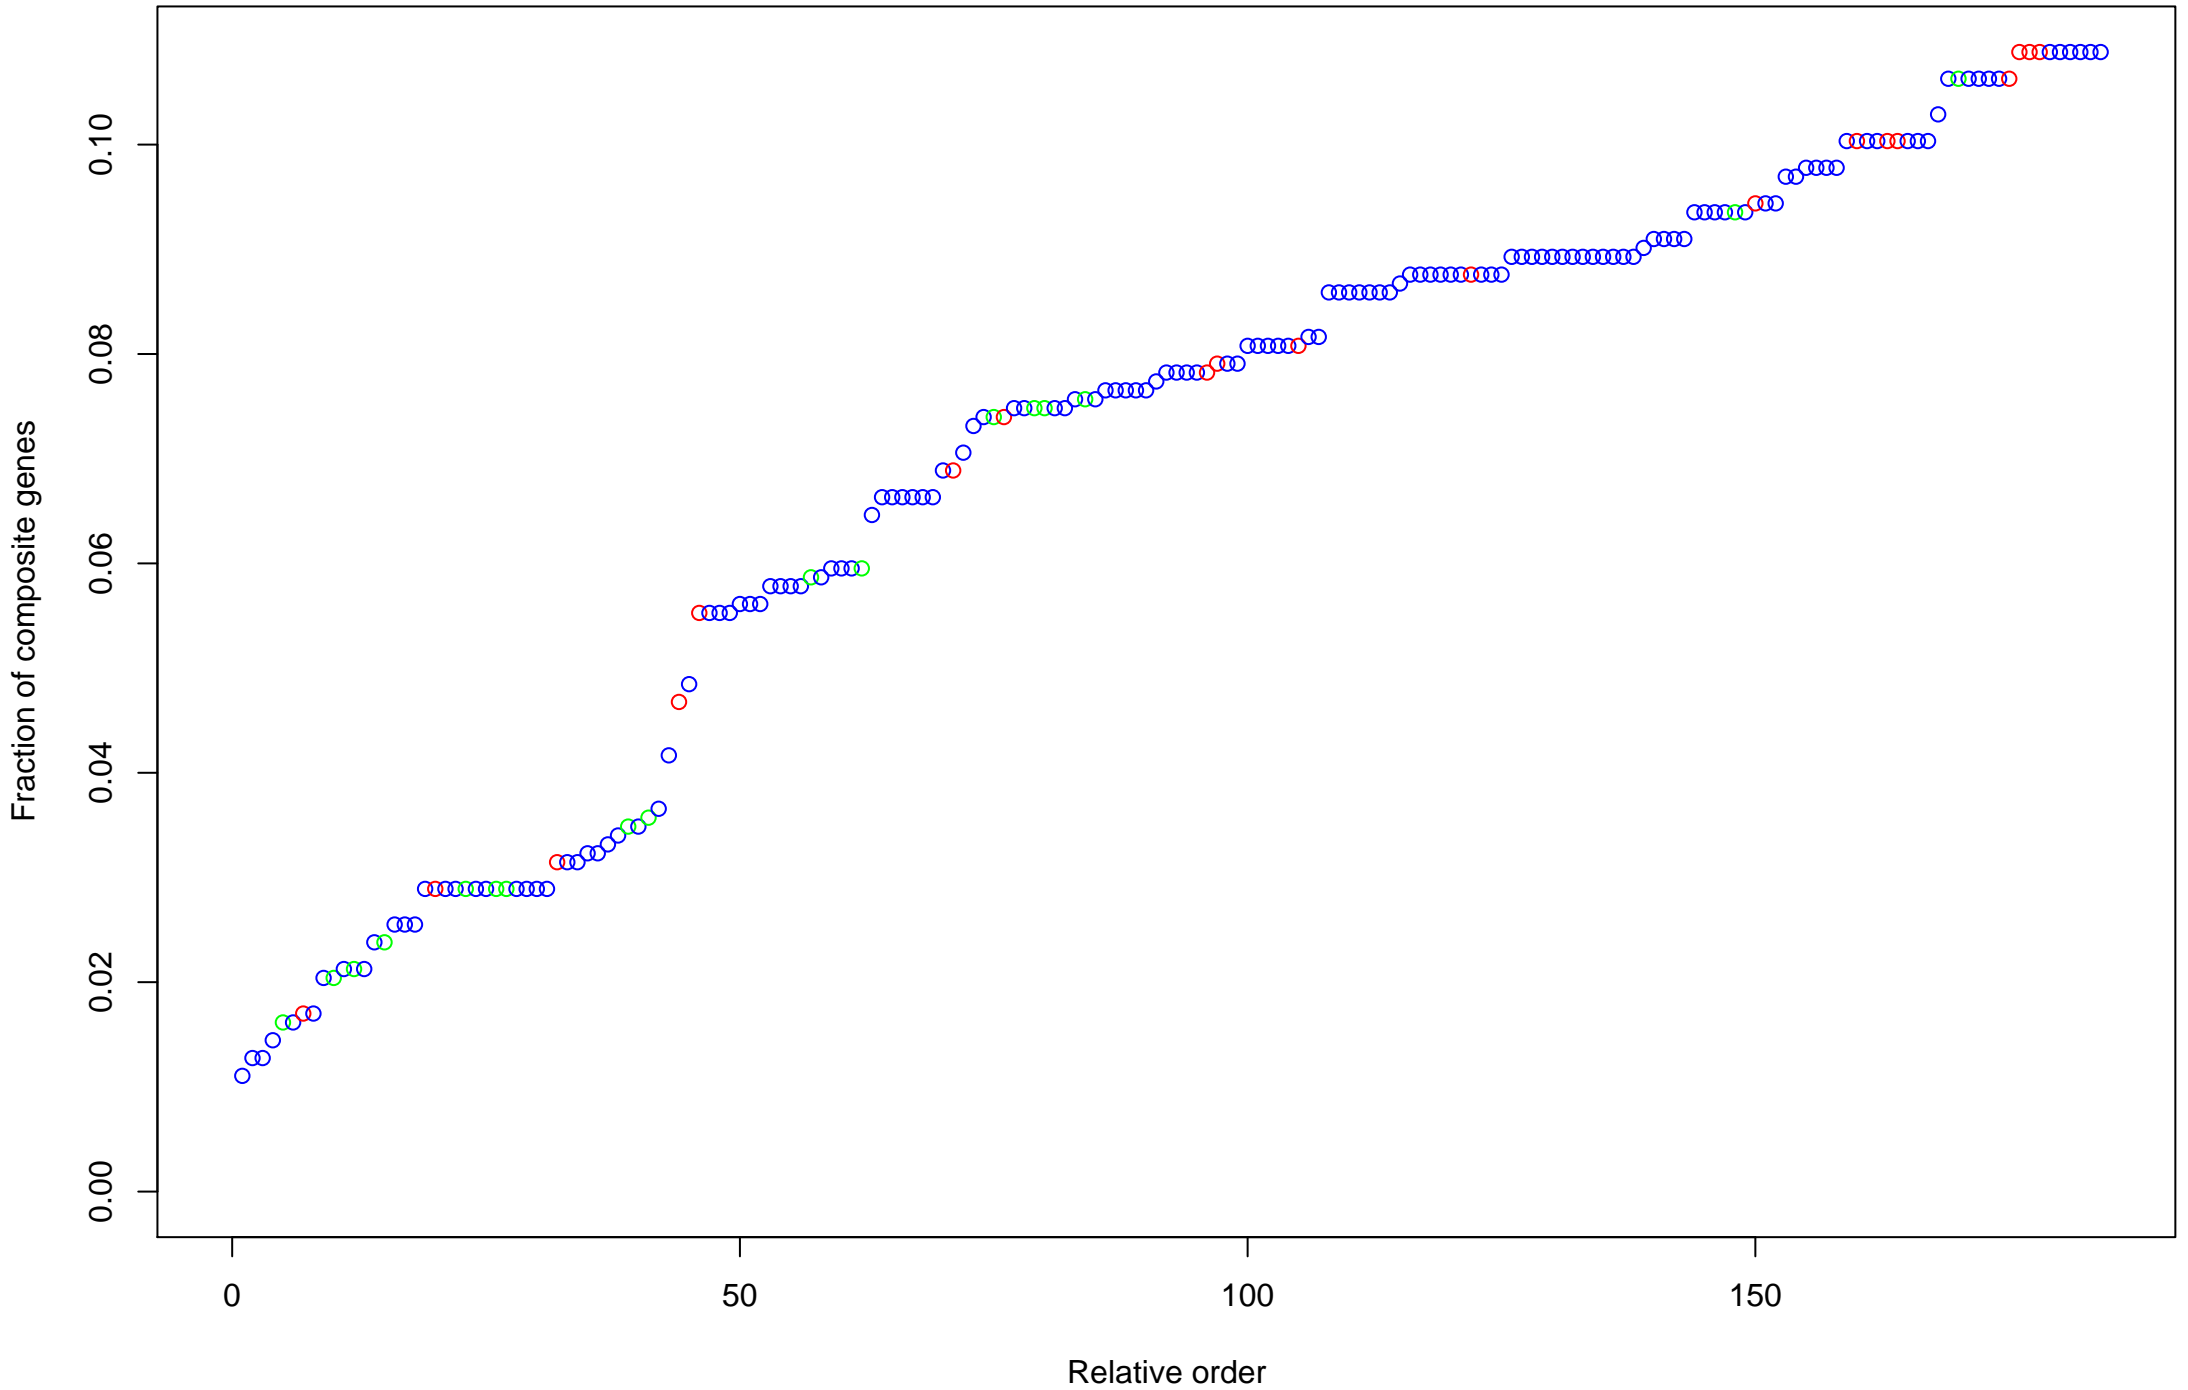

# AGOS-XXX-01 (*Ashbya gossypii*)

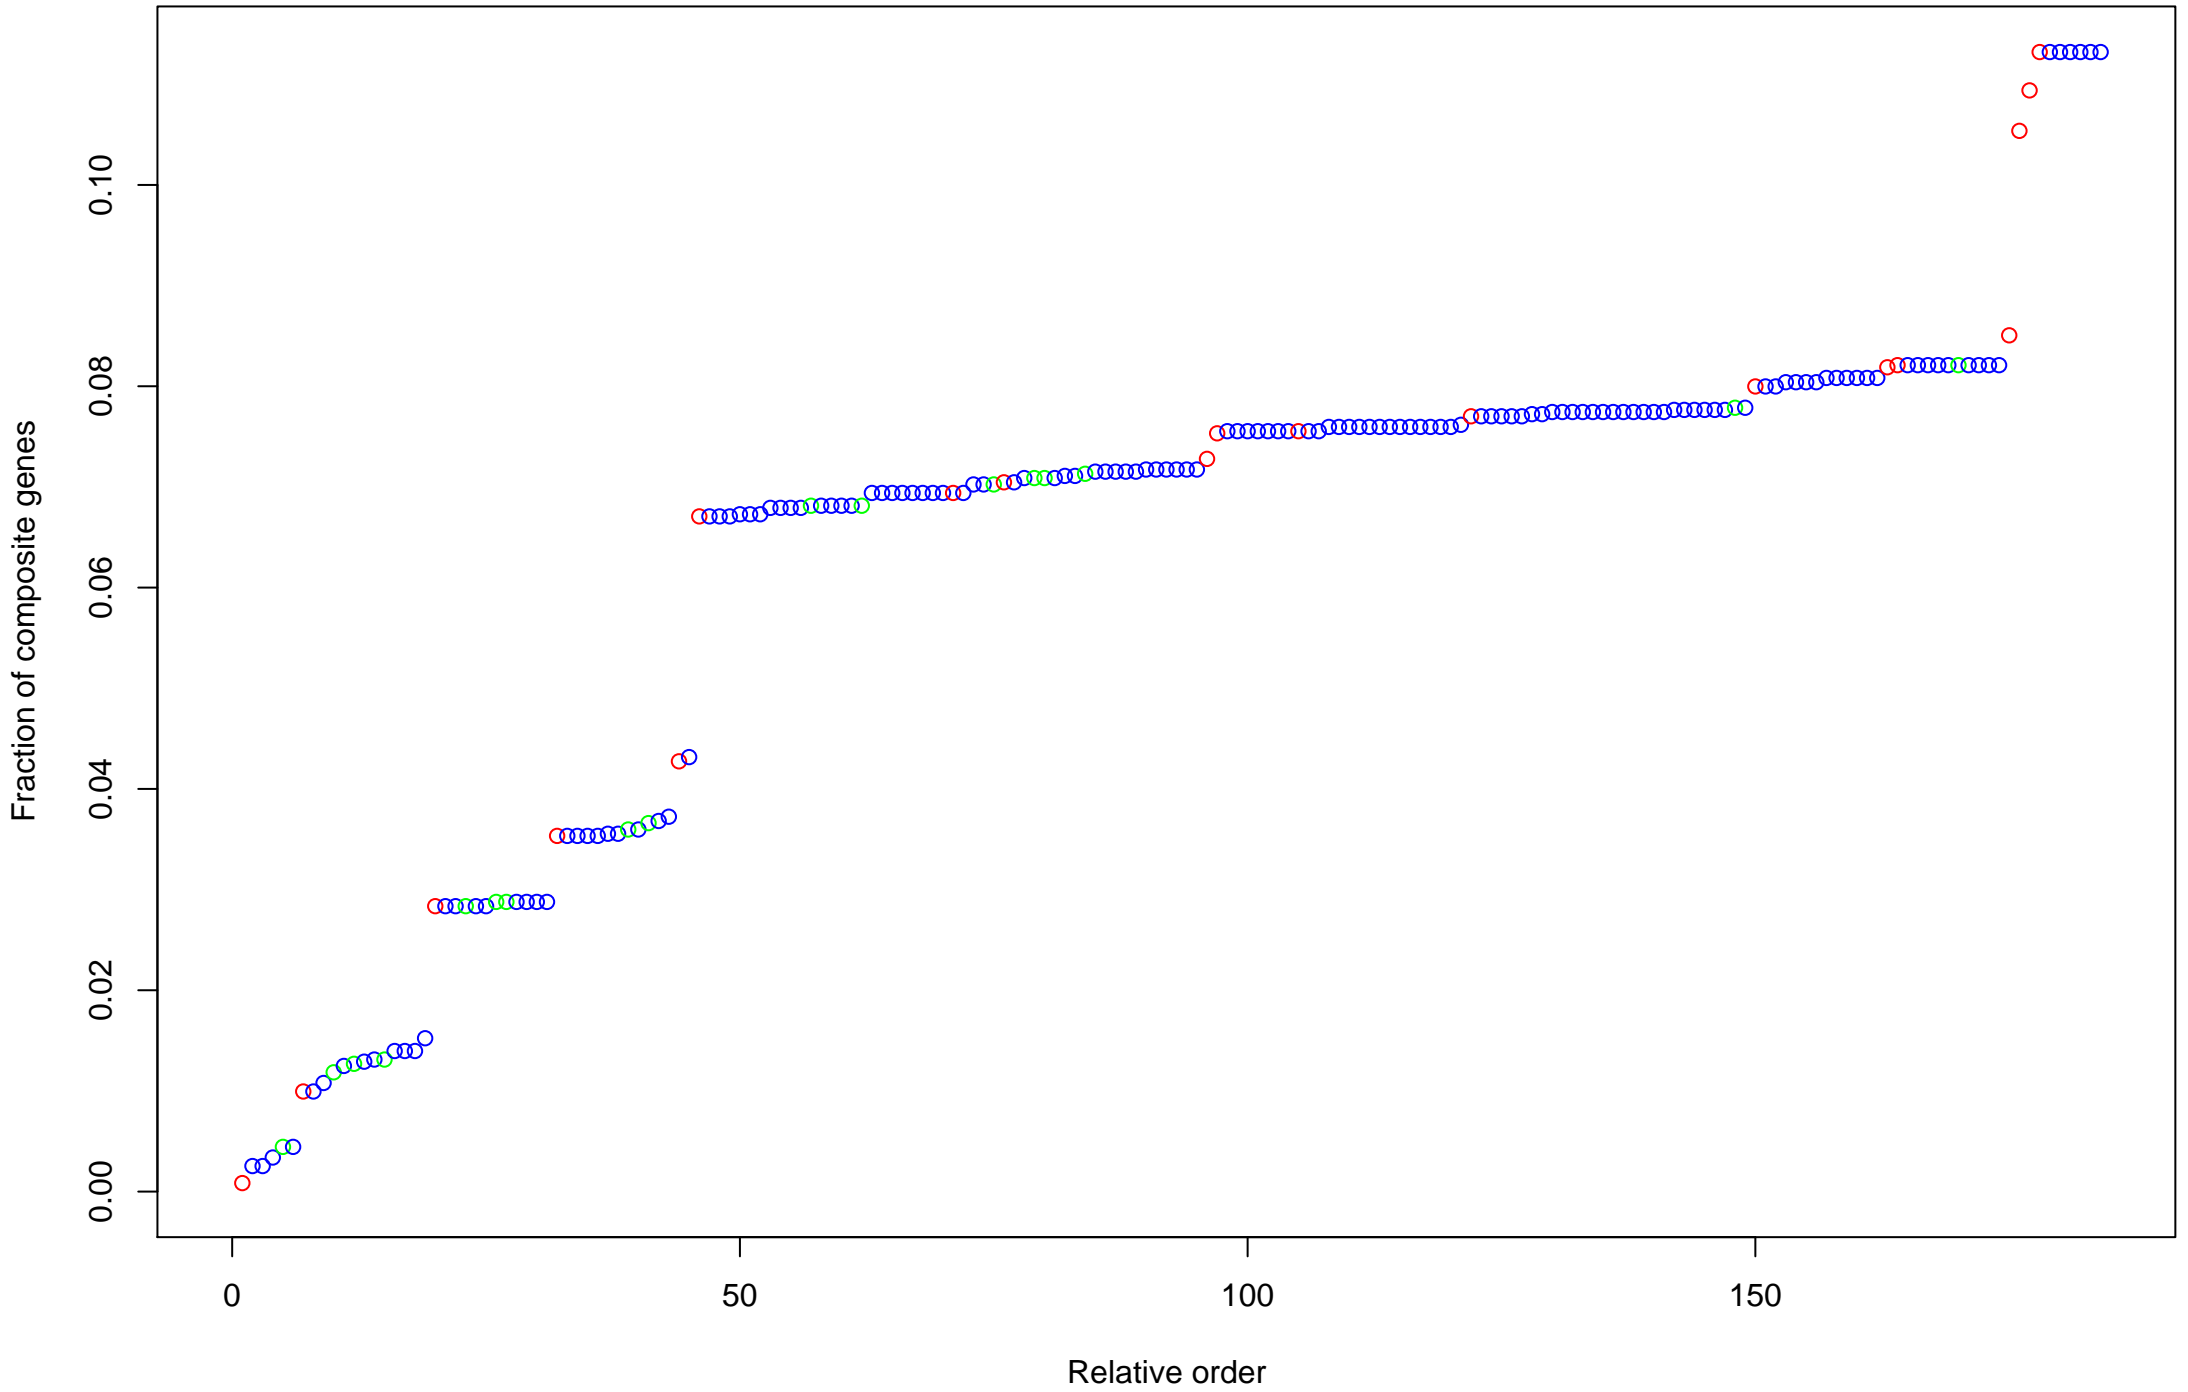



# LINT-130-01 (*Leptospira interrogans*)

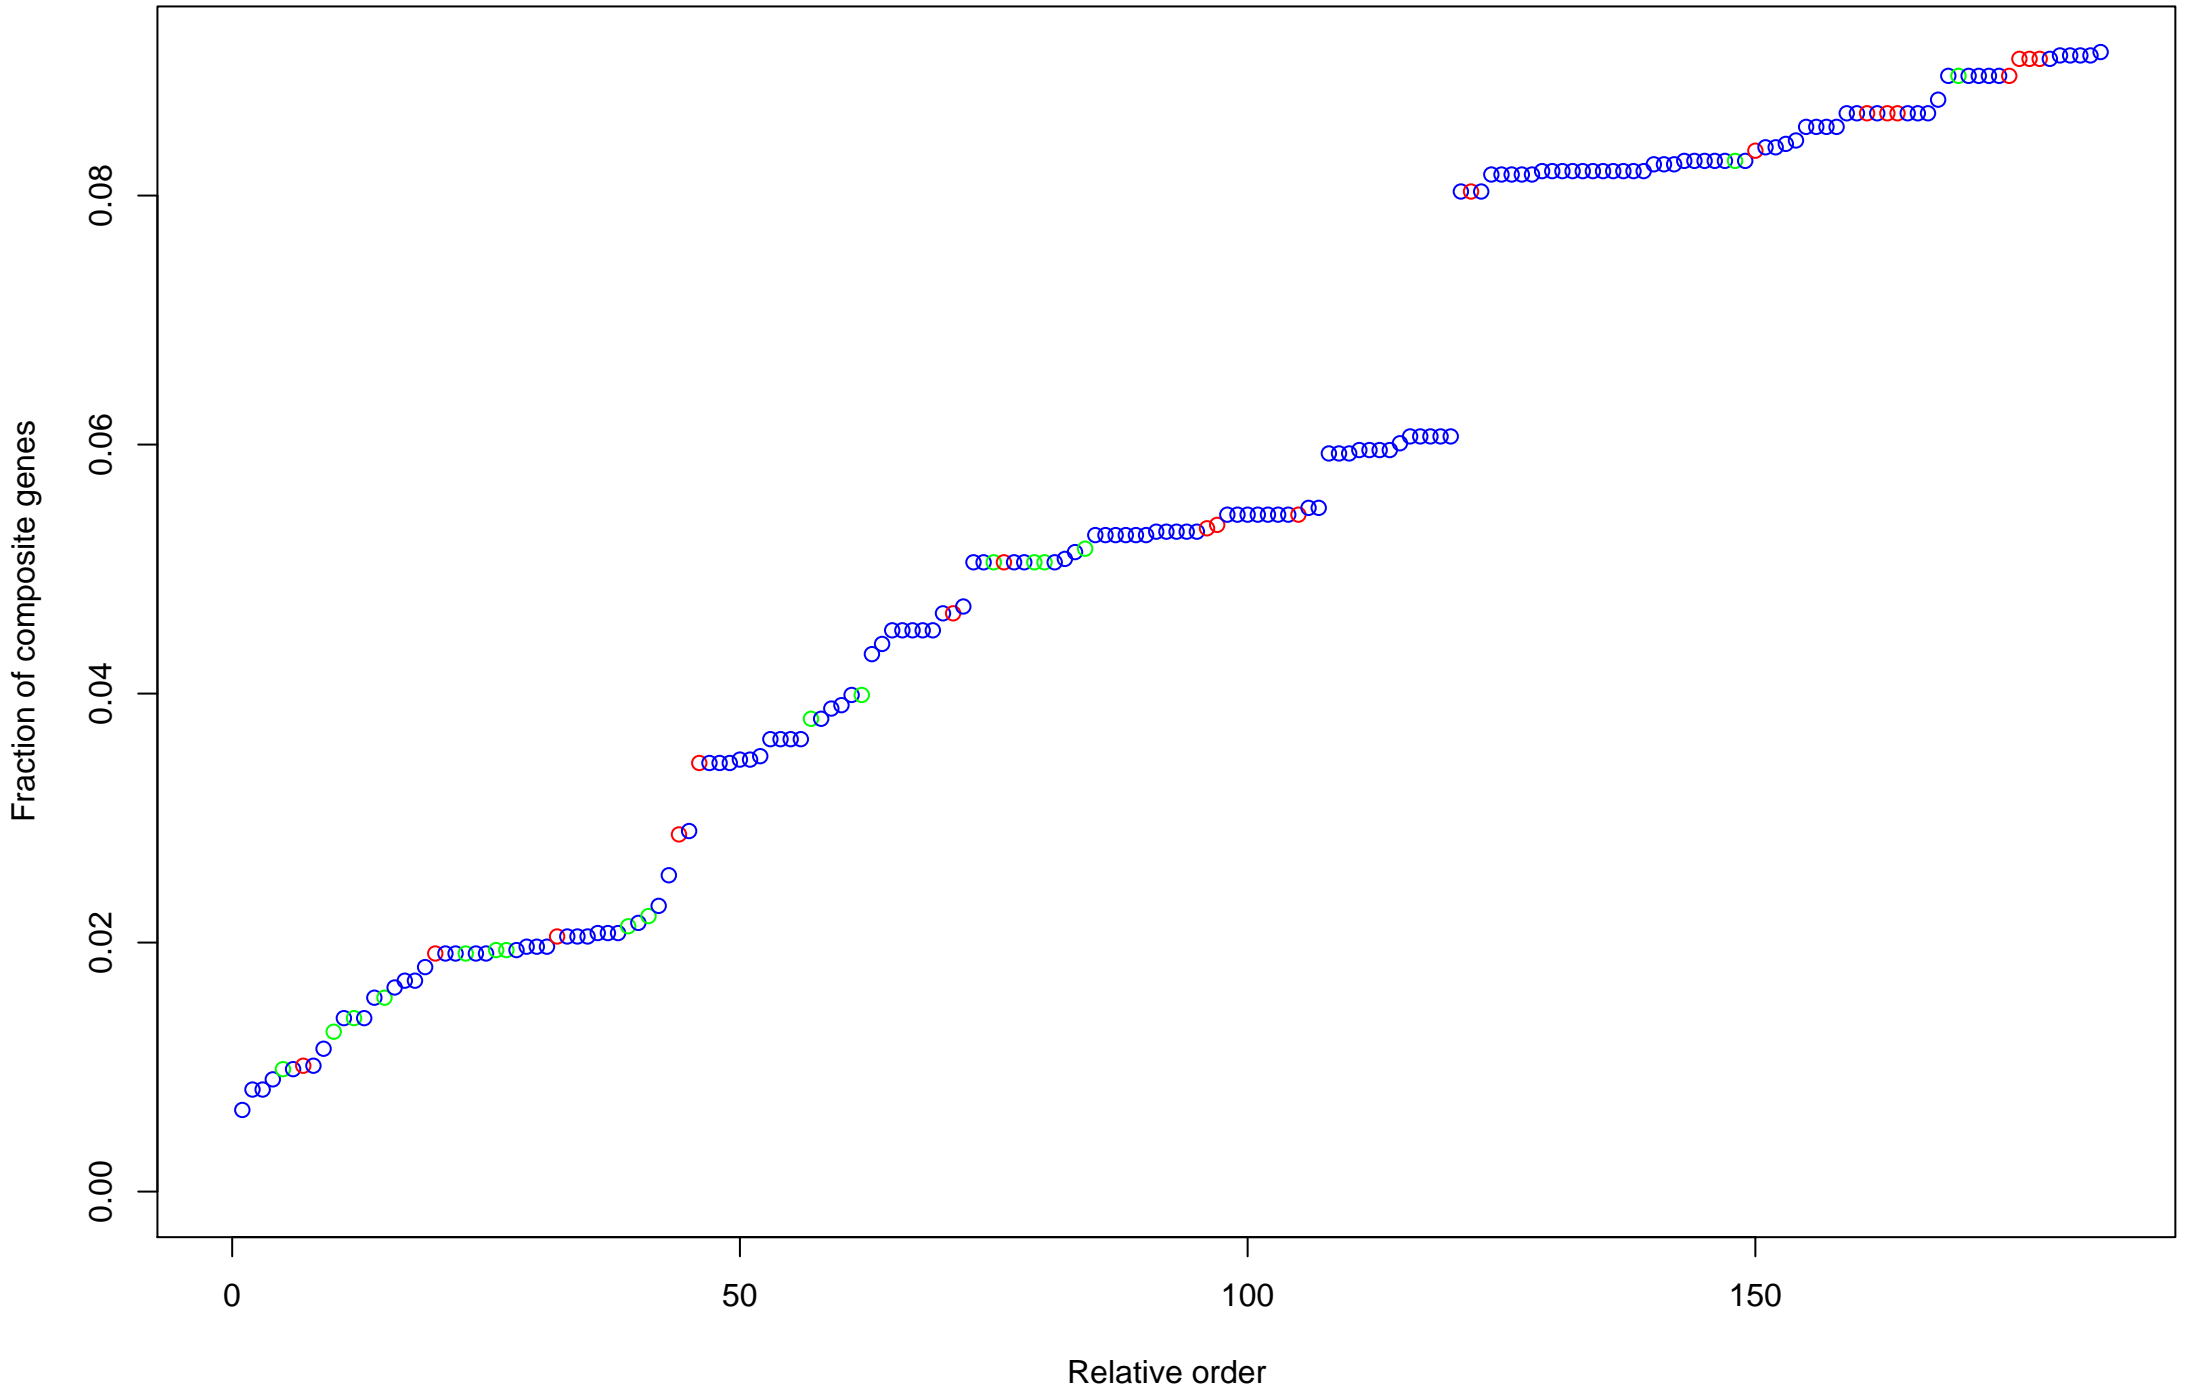

# TTHE-B27-01 (*Thermus thermophilus*)

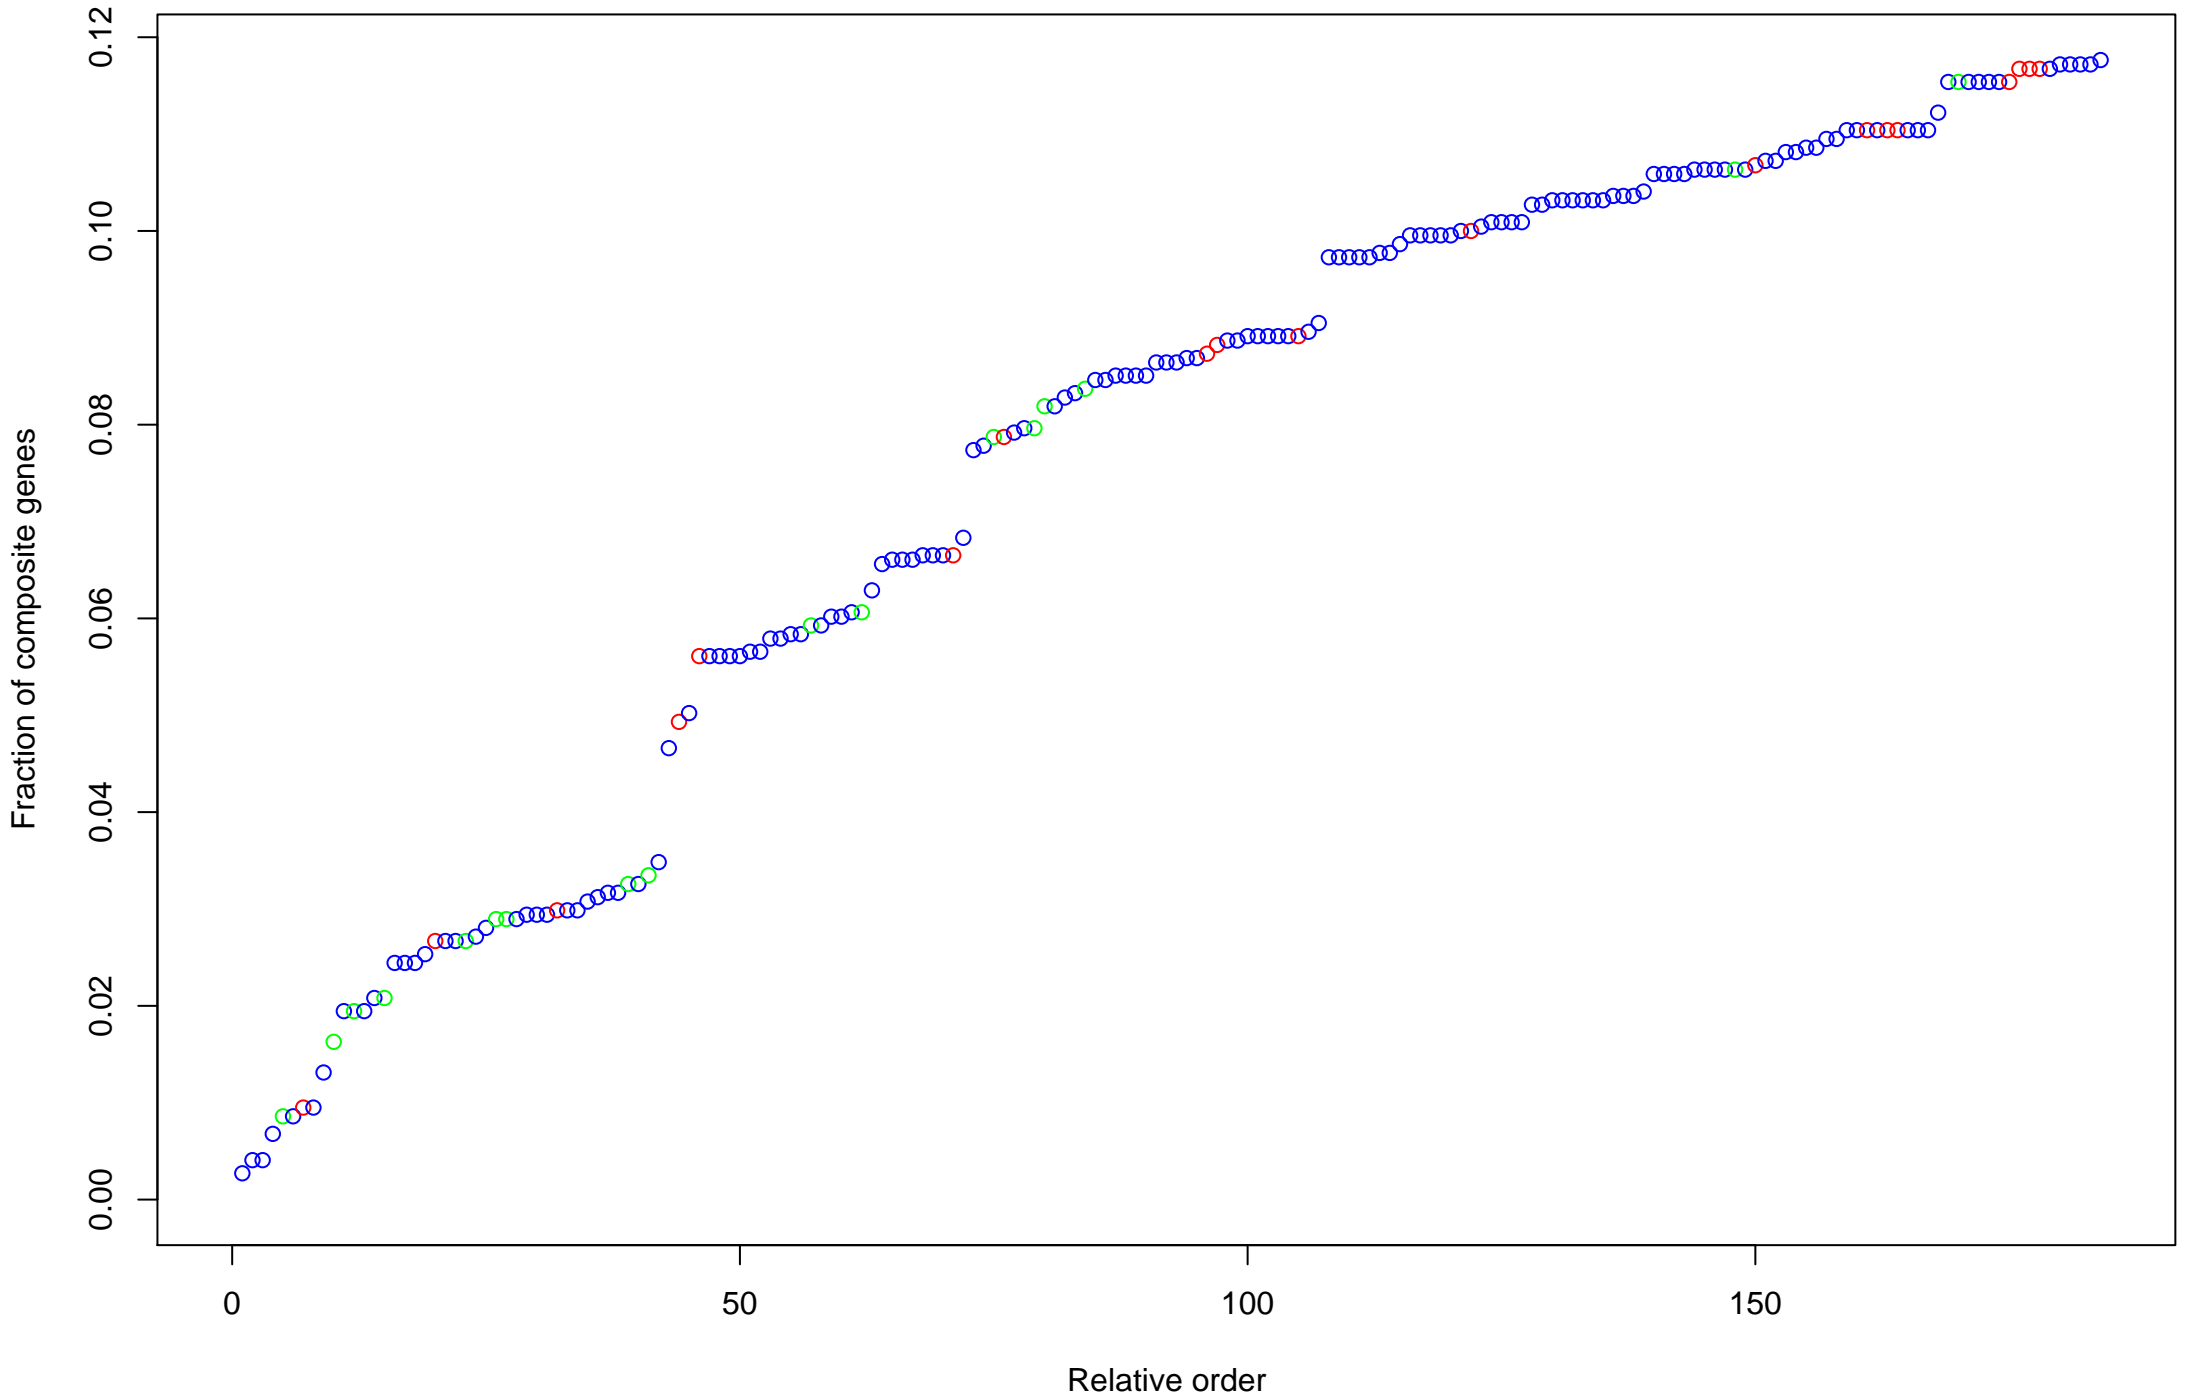

# CMER-10D-01 (*Cyanidioschyzon merolae*)

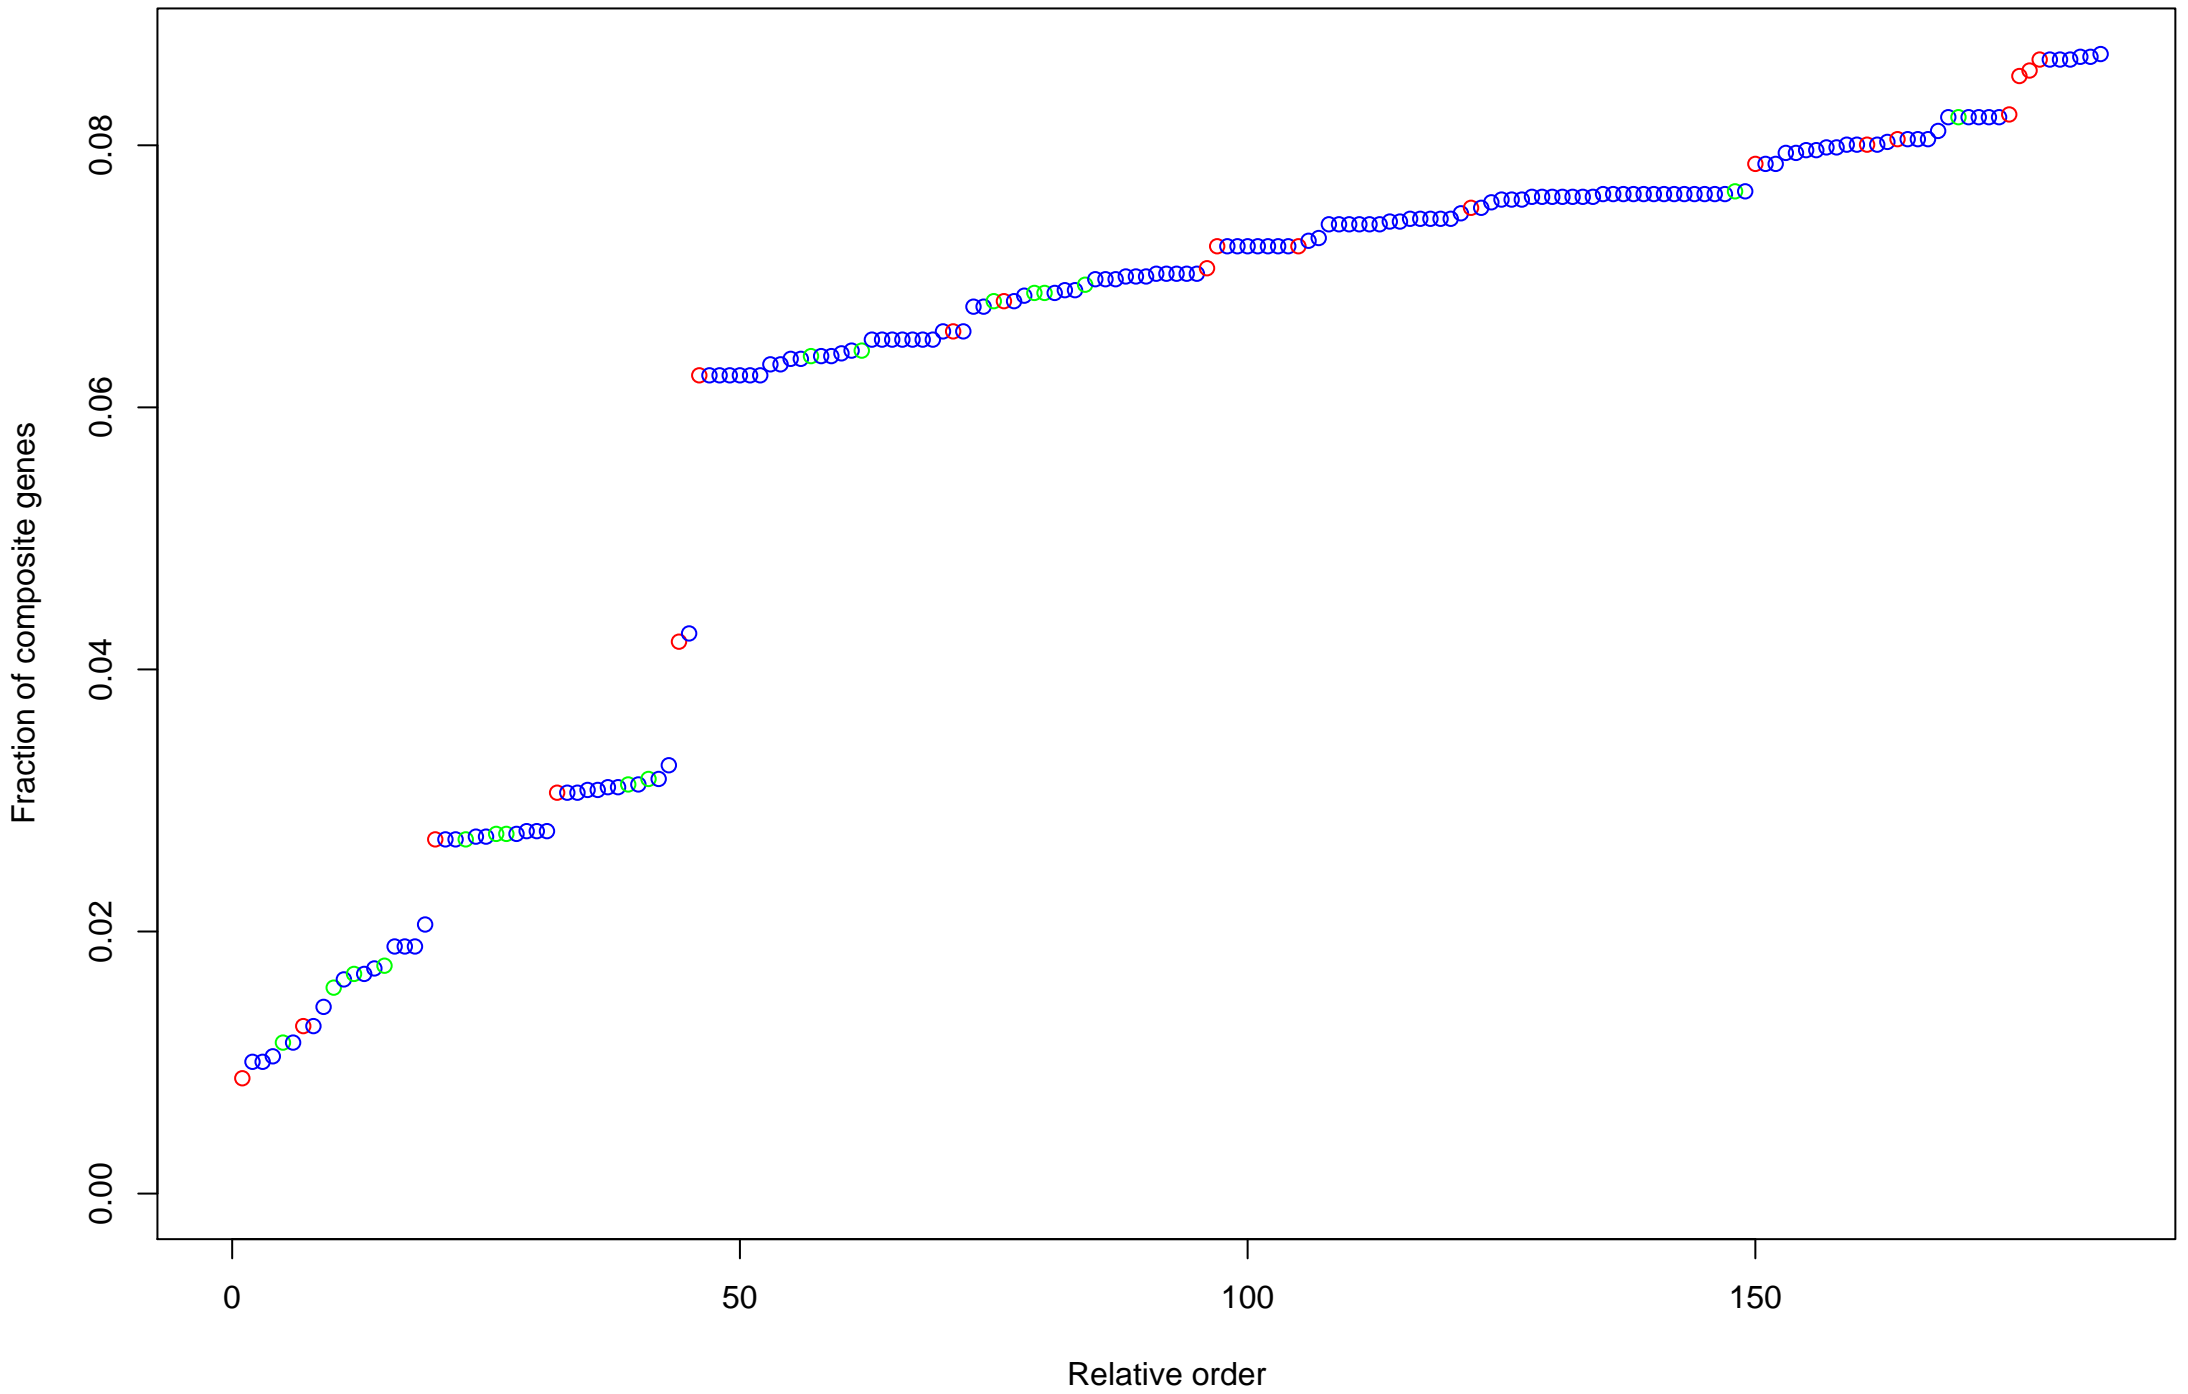

# CPAR-TII-01 (*Cryptosporidium parvum*)

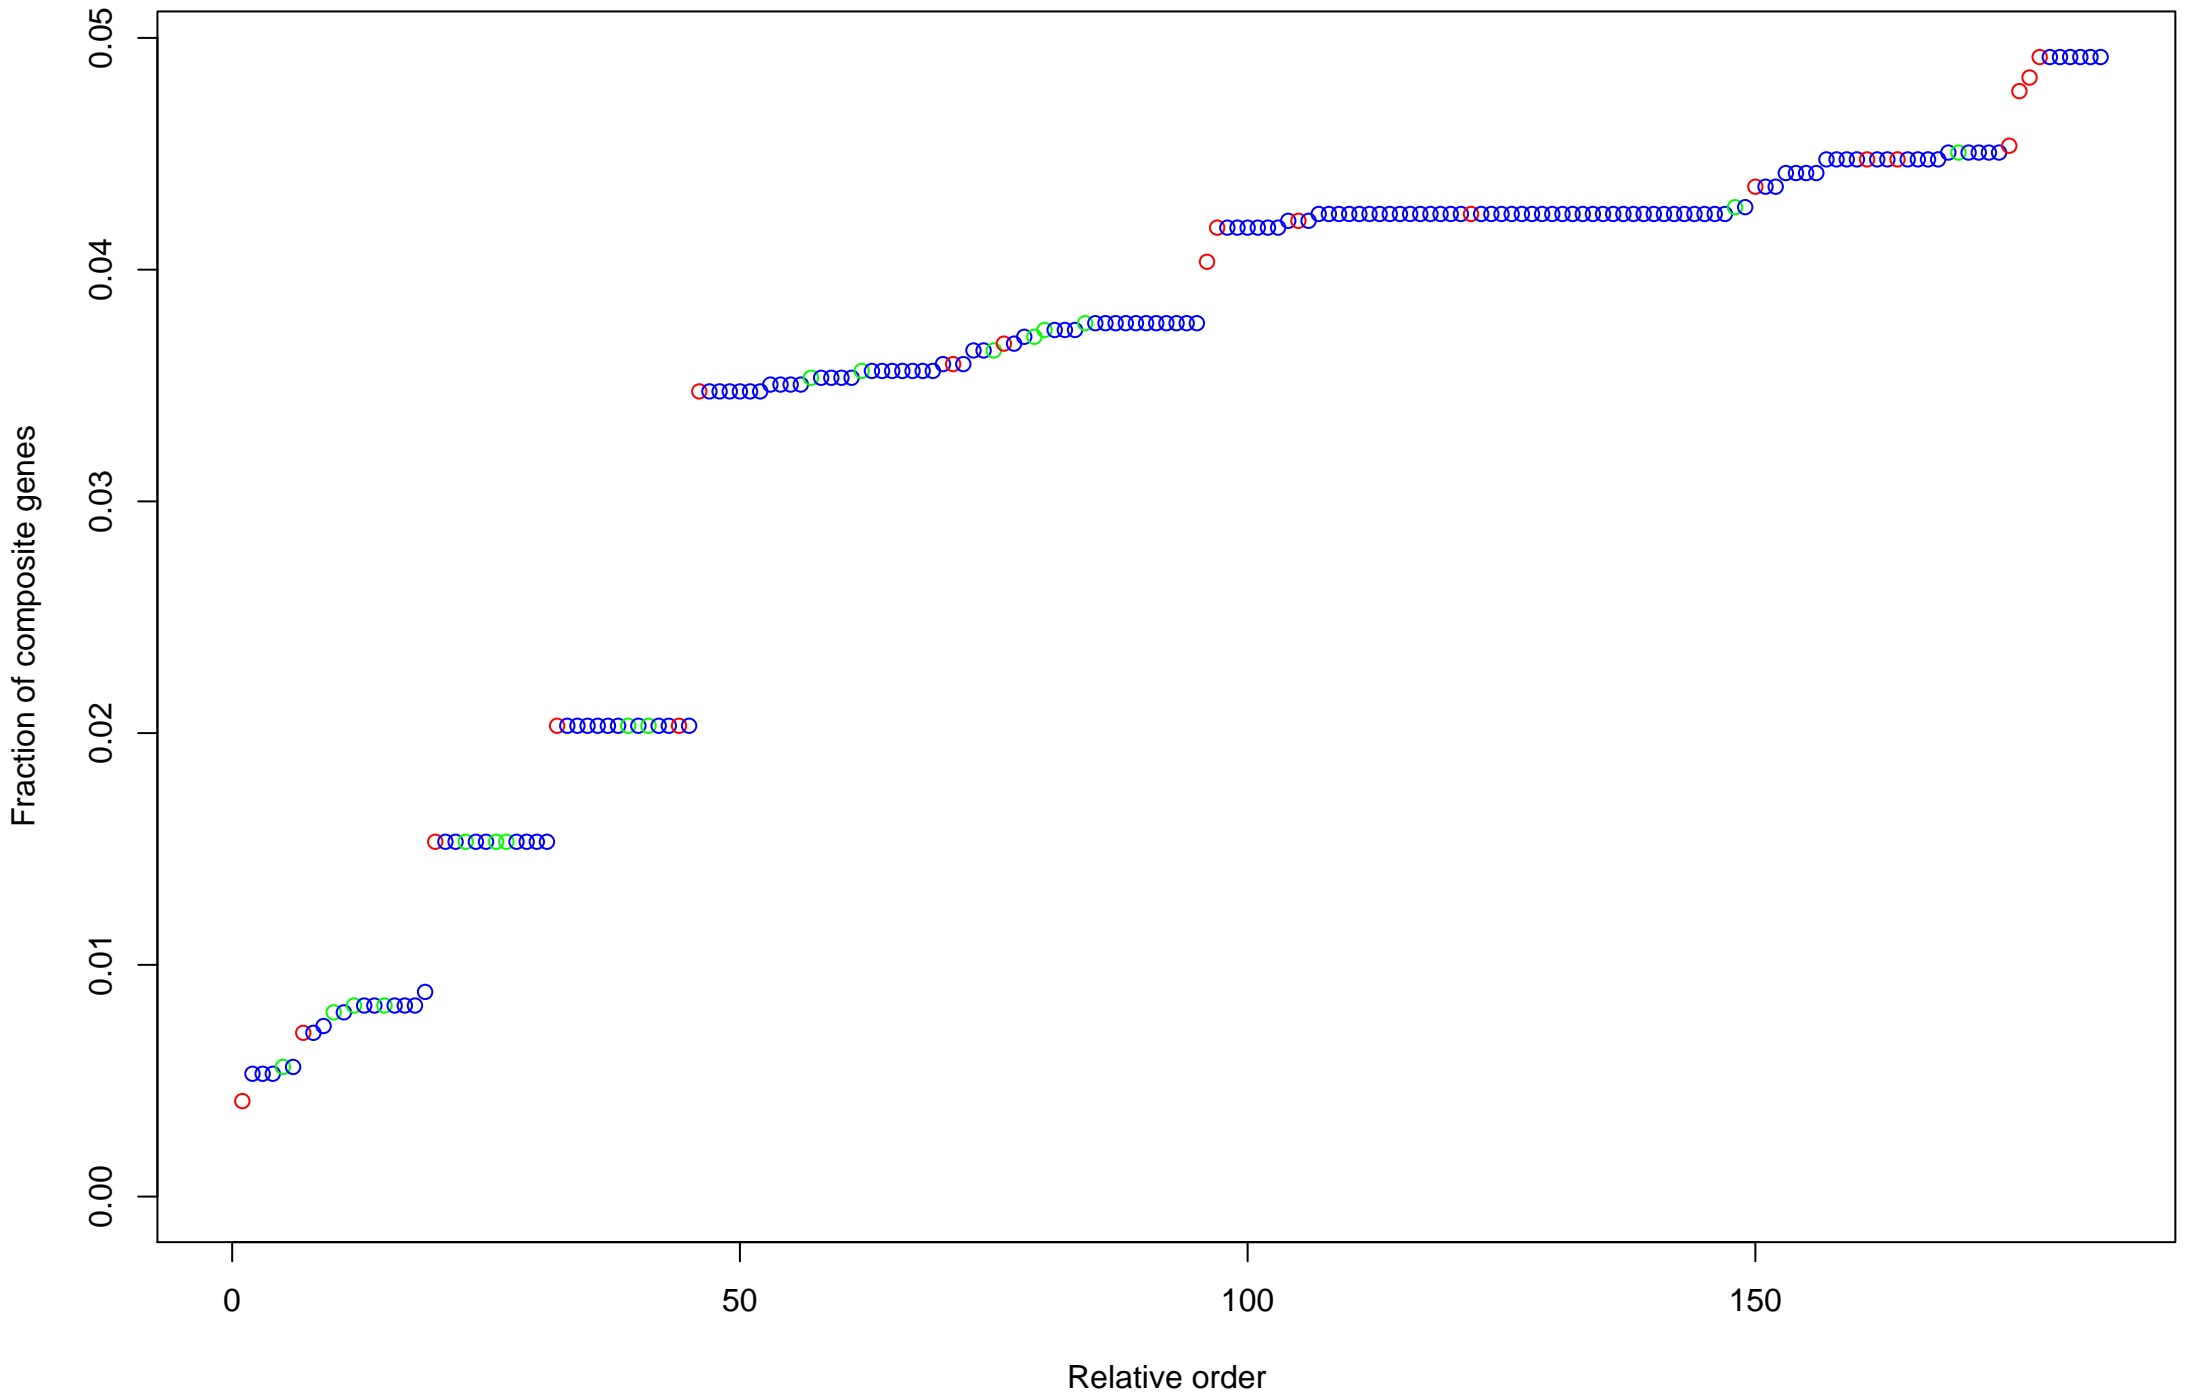

# PCHL-E25-01 (Parachlamydia sp.)

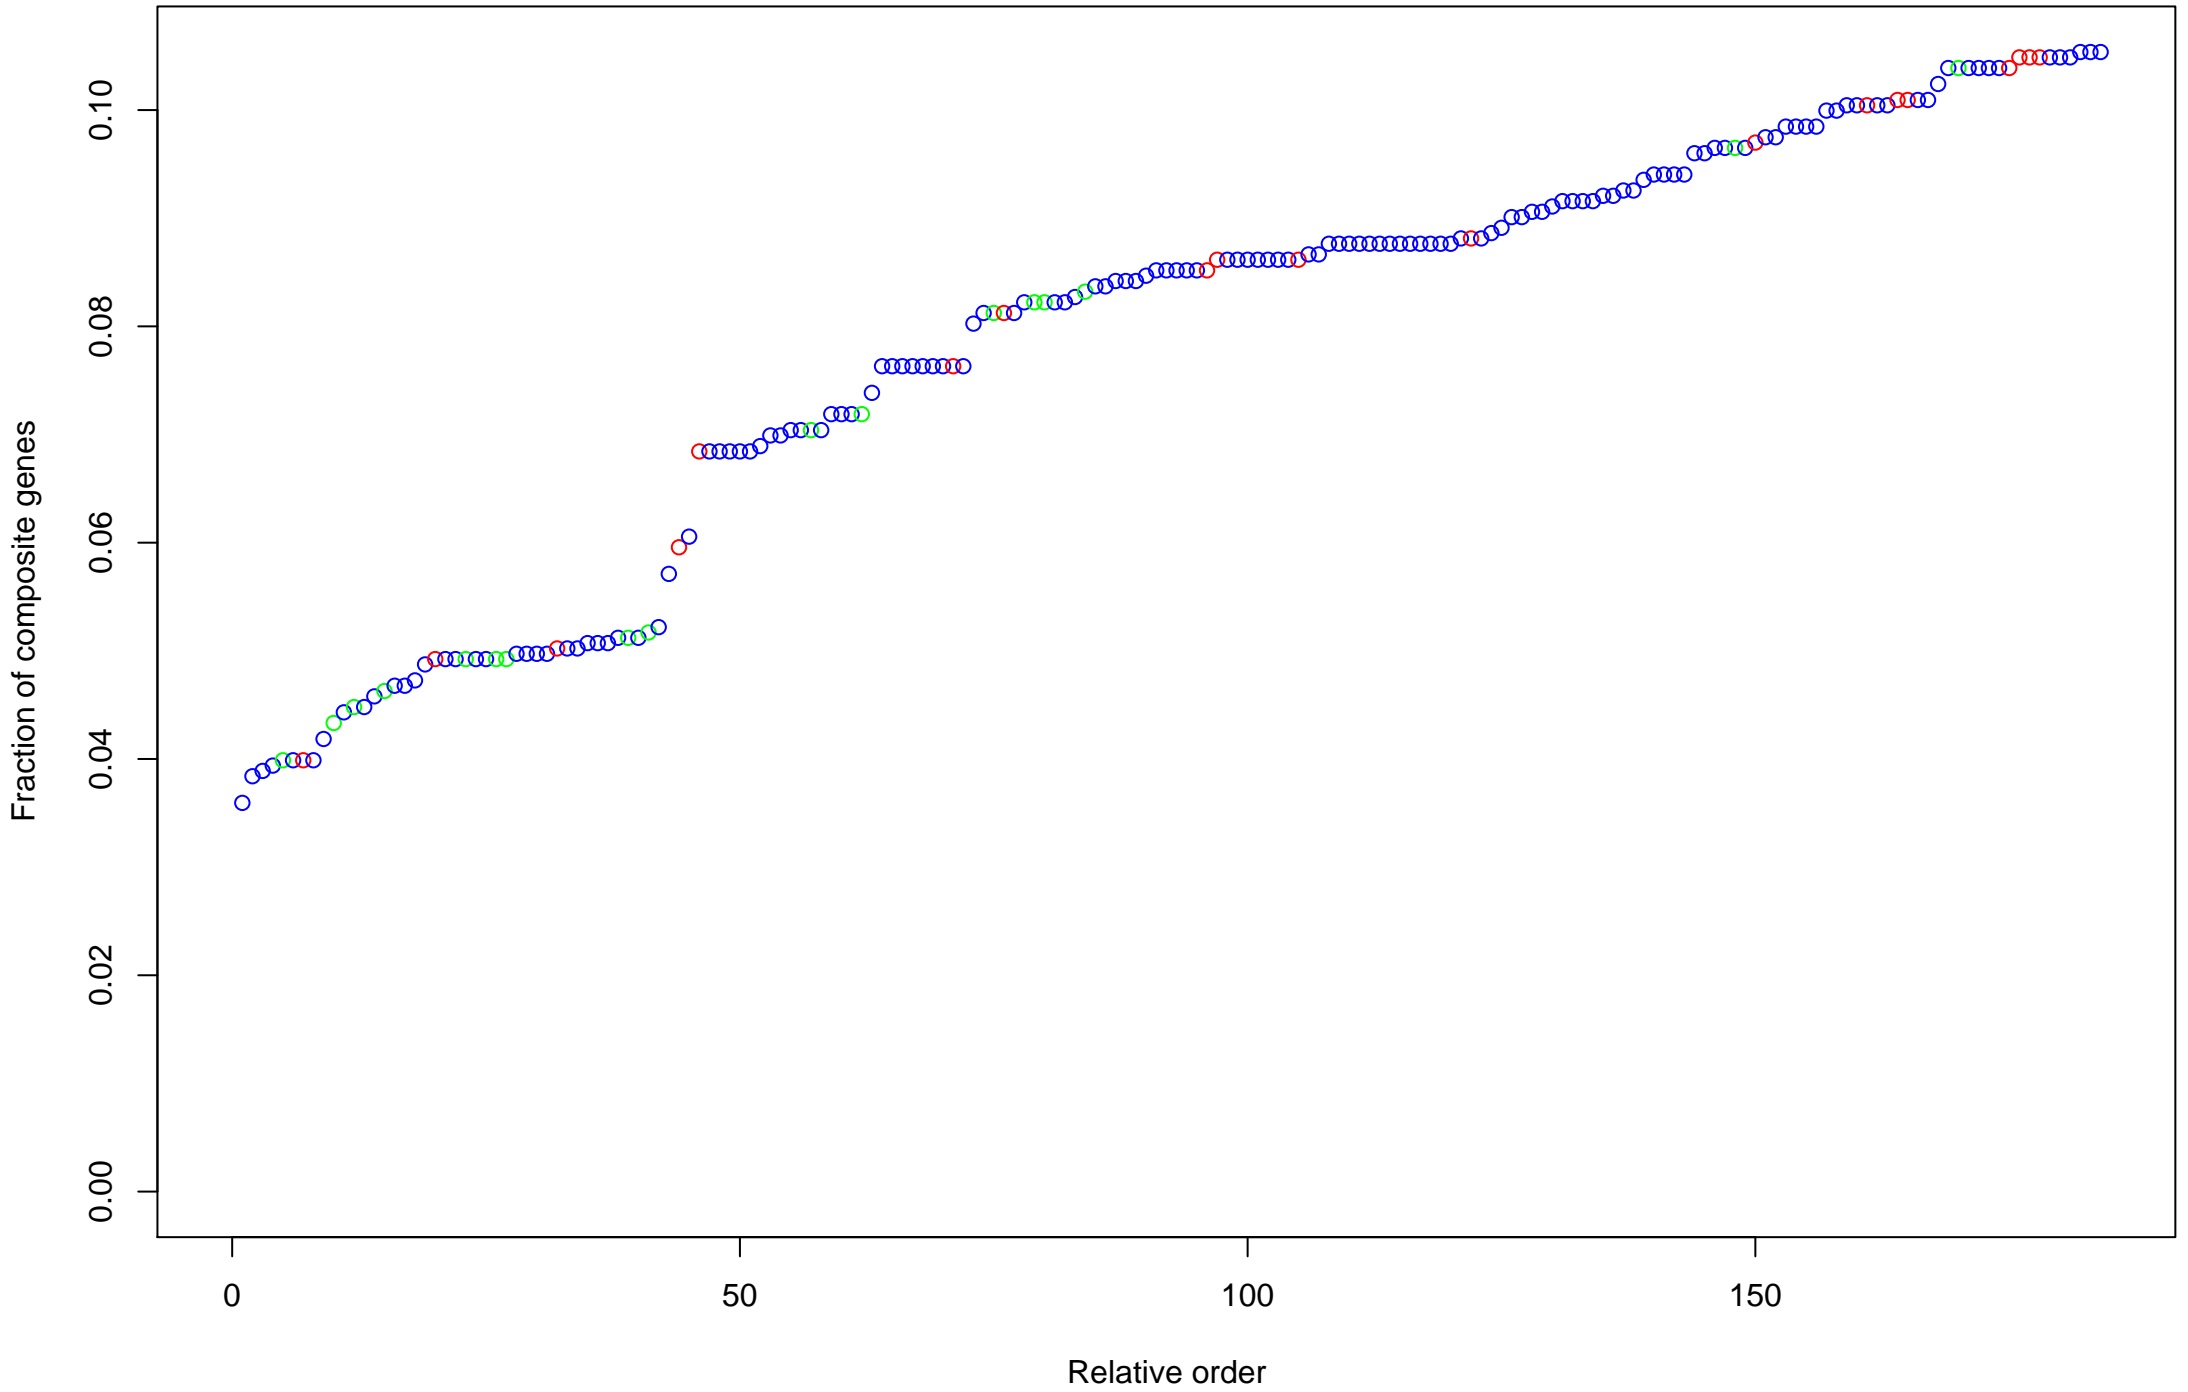

# DVUL-HIL-01 (*Desulfovibrio vulgaris*)

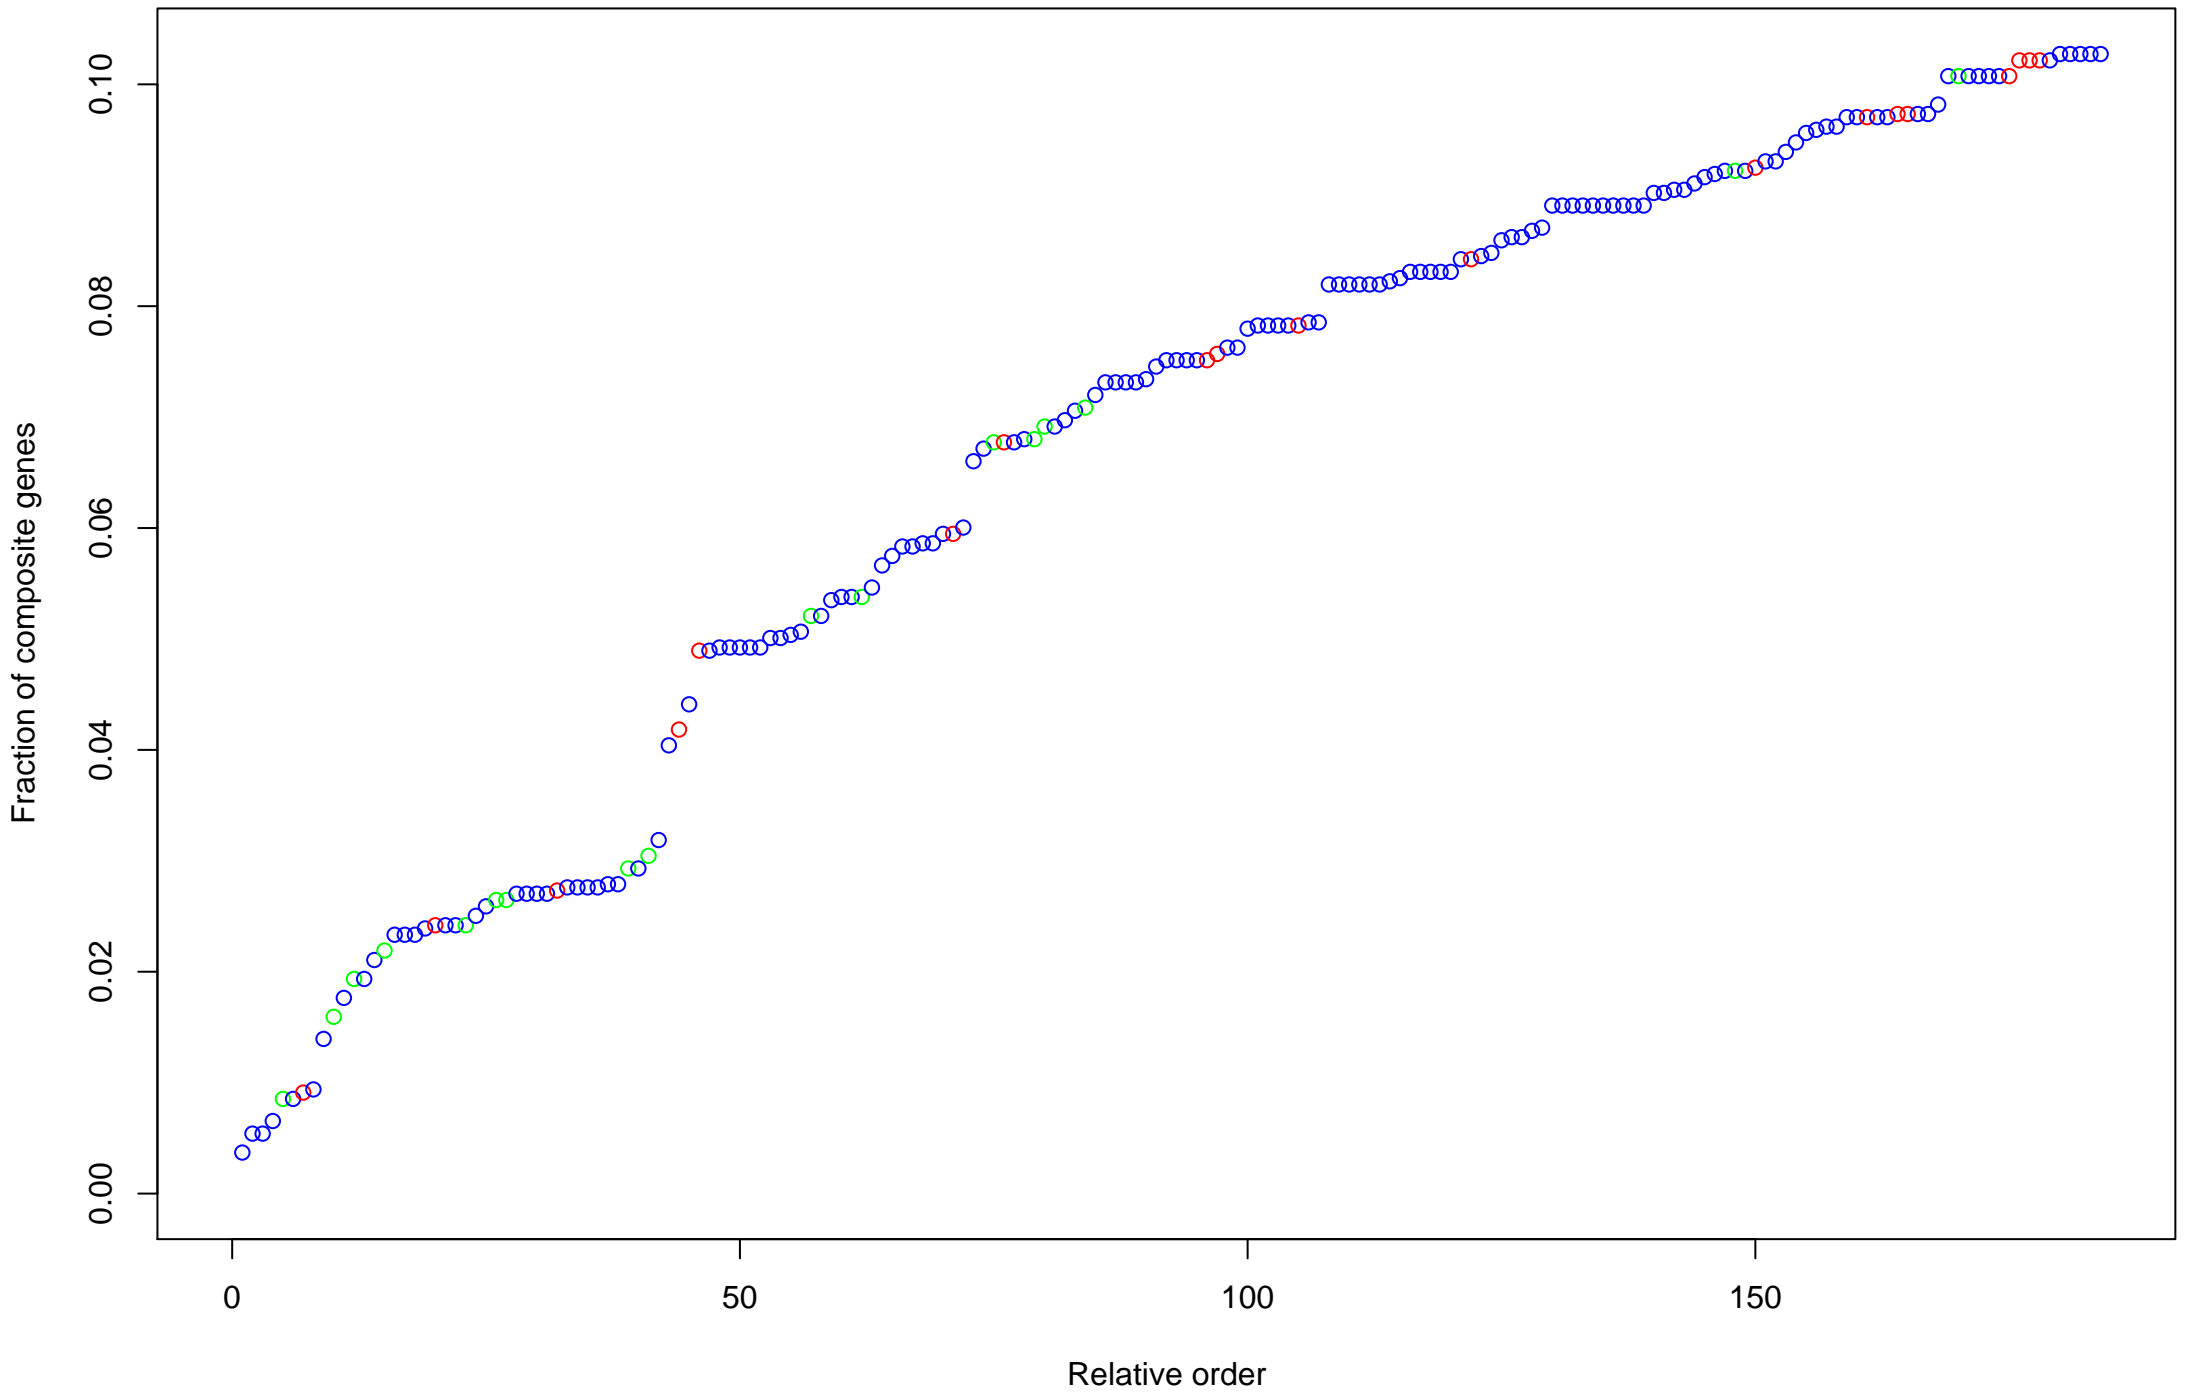

# LMON-365-01 (*Listeria monocytogenes*)

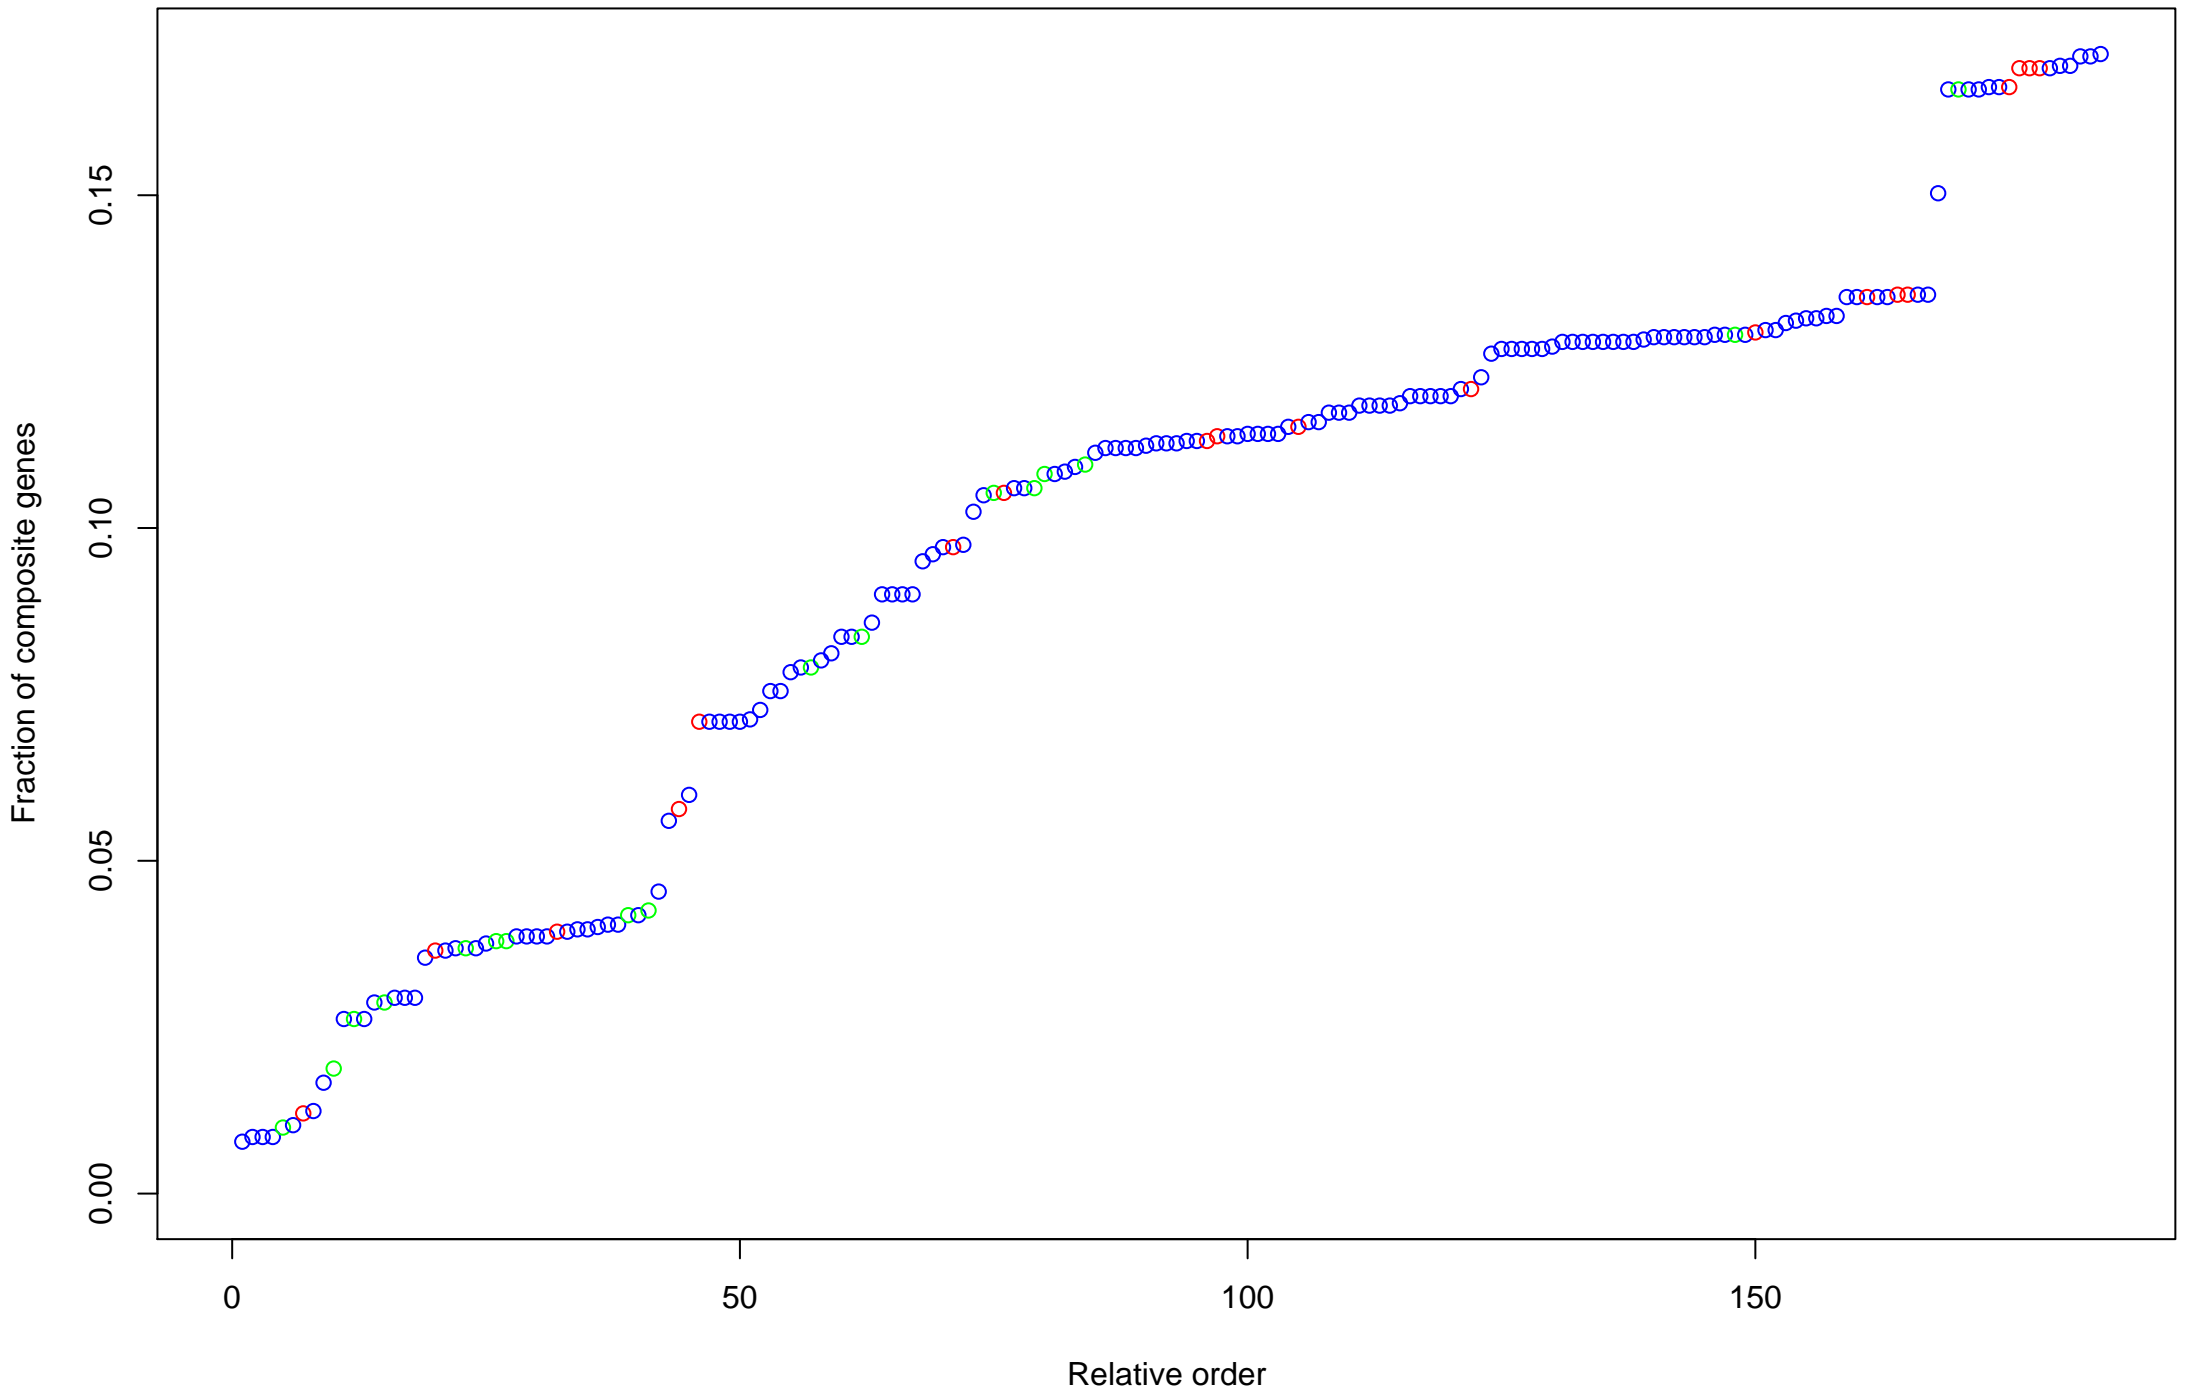

# LMON-854-01 (*Listeria monocytogenes*)

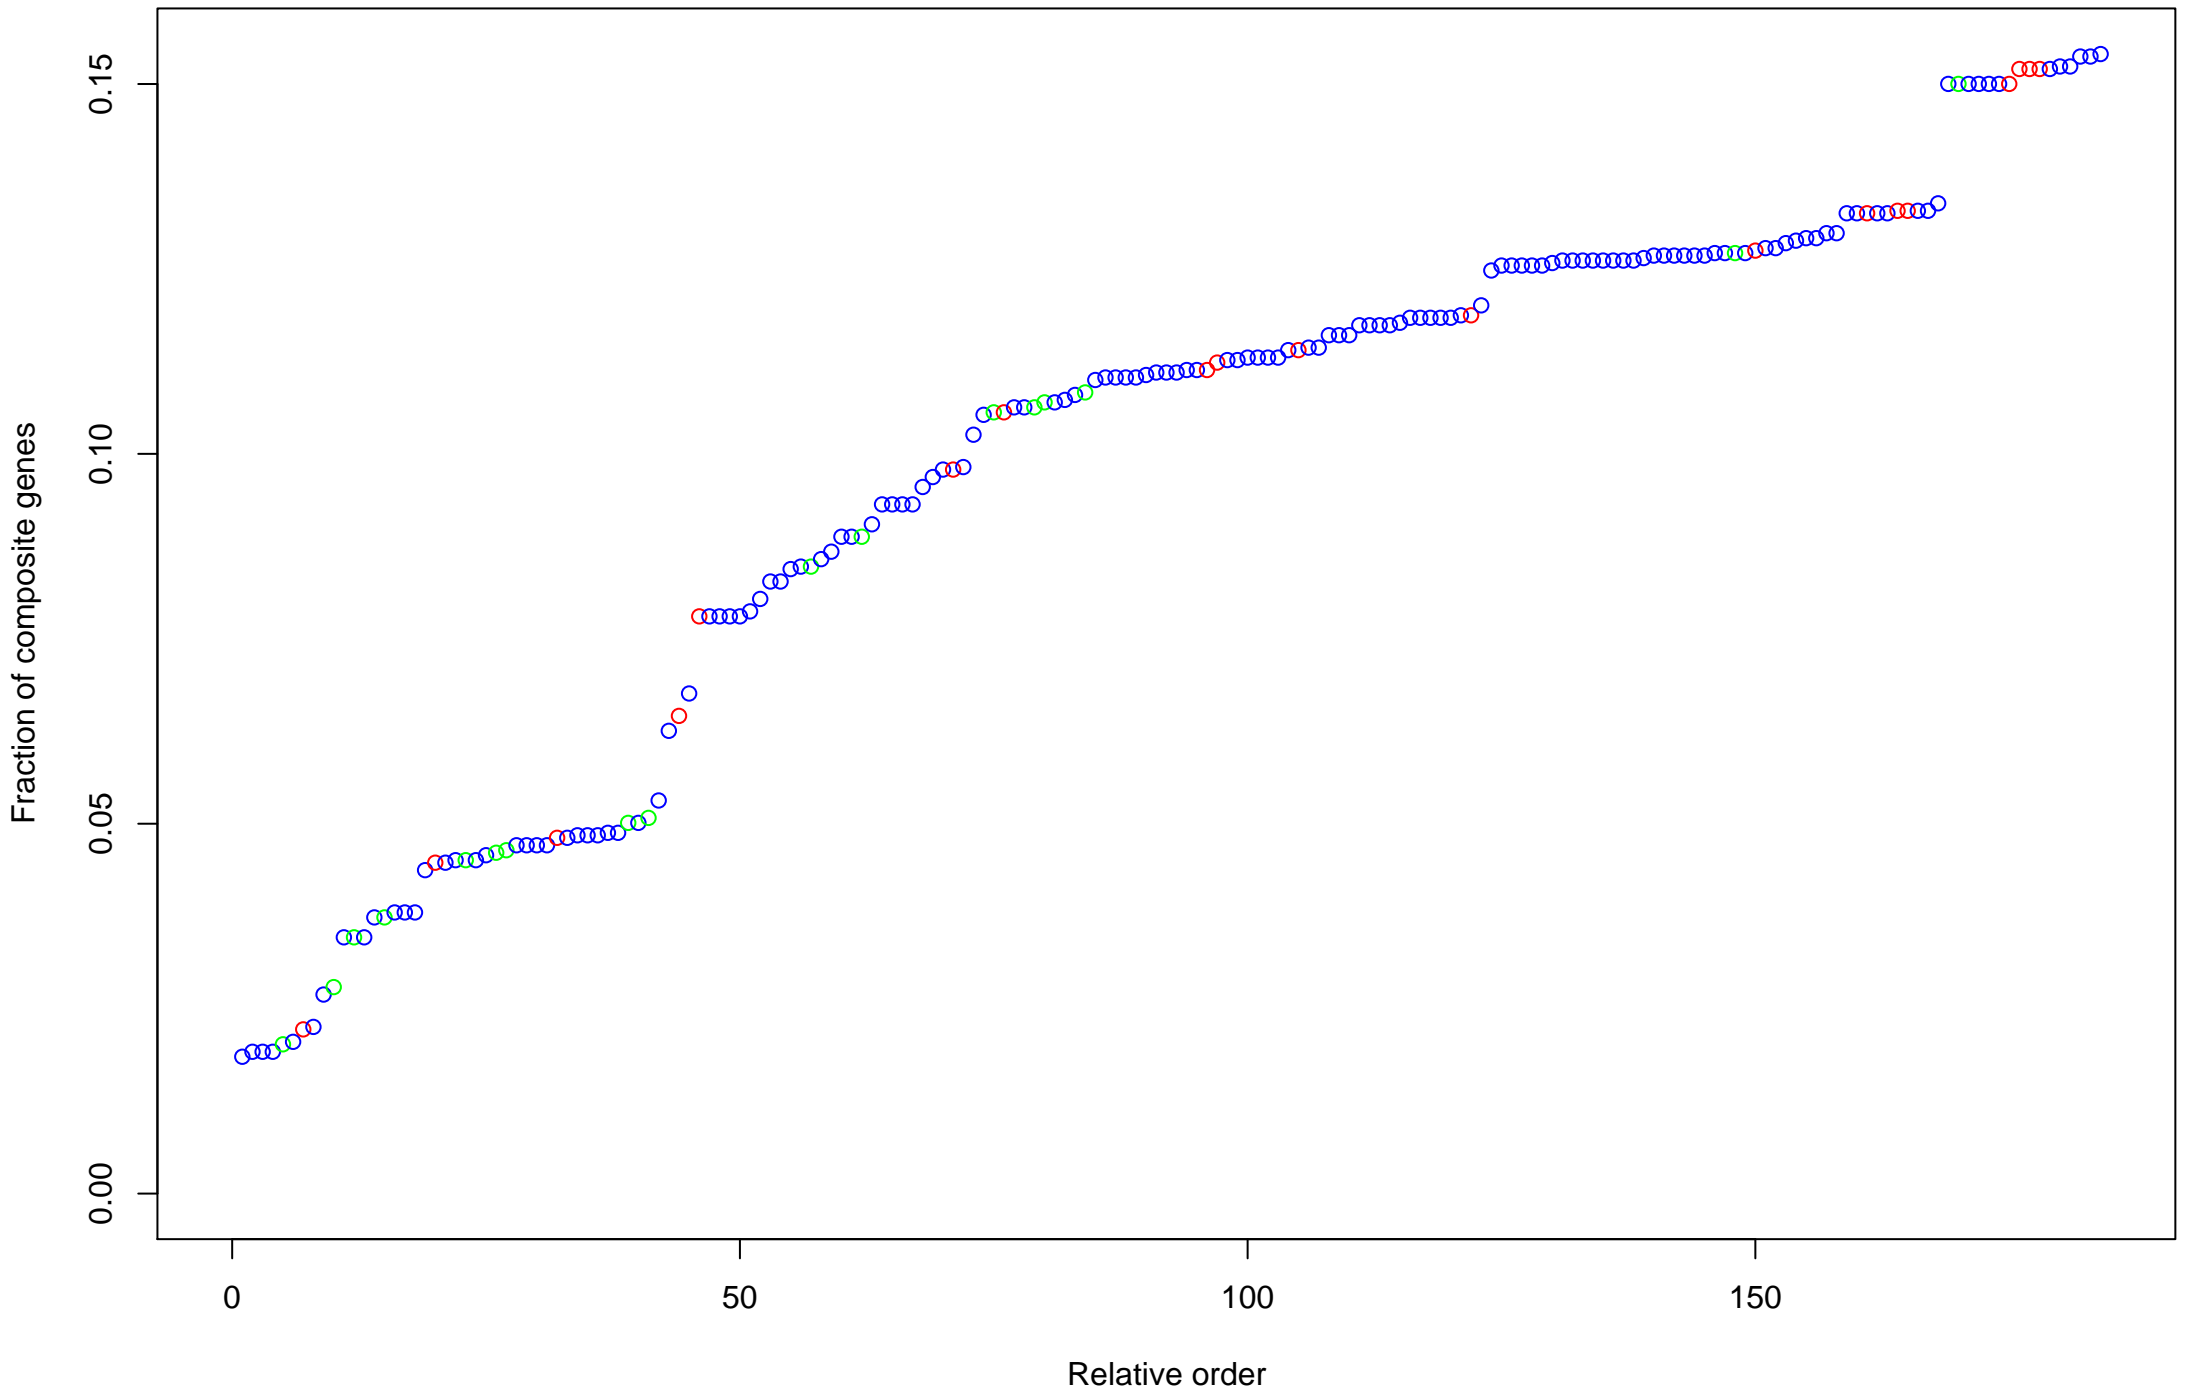



# LMON-858-01 (*Listeria monocytogenes*)

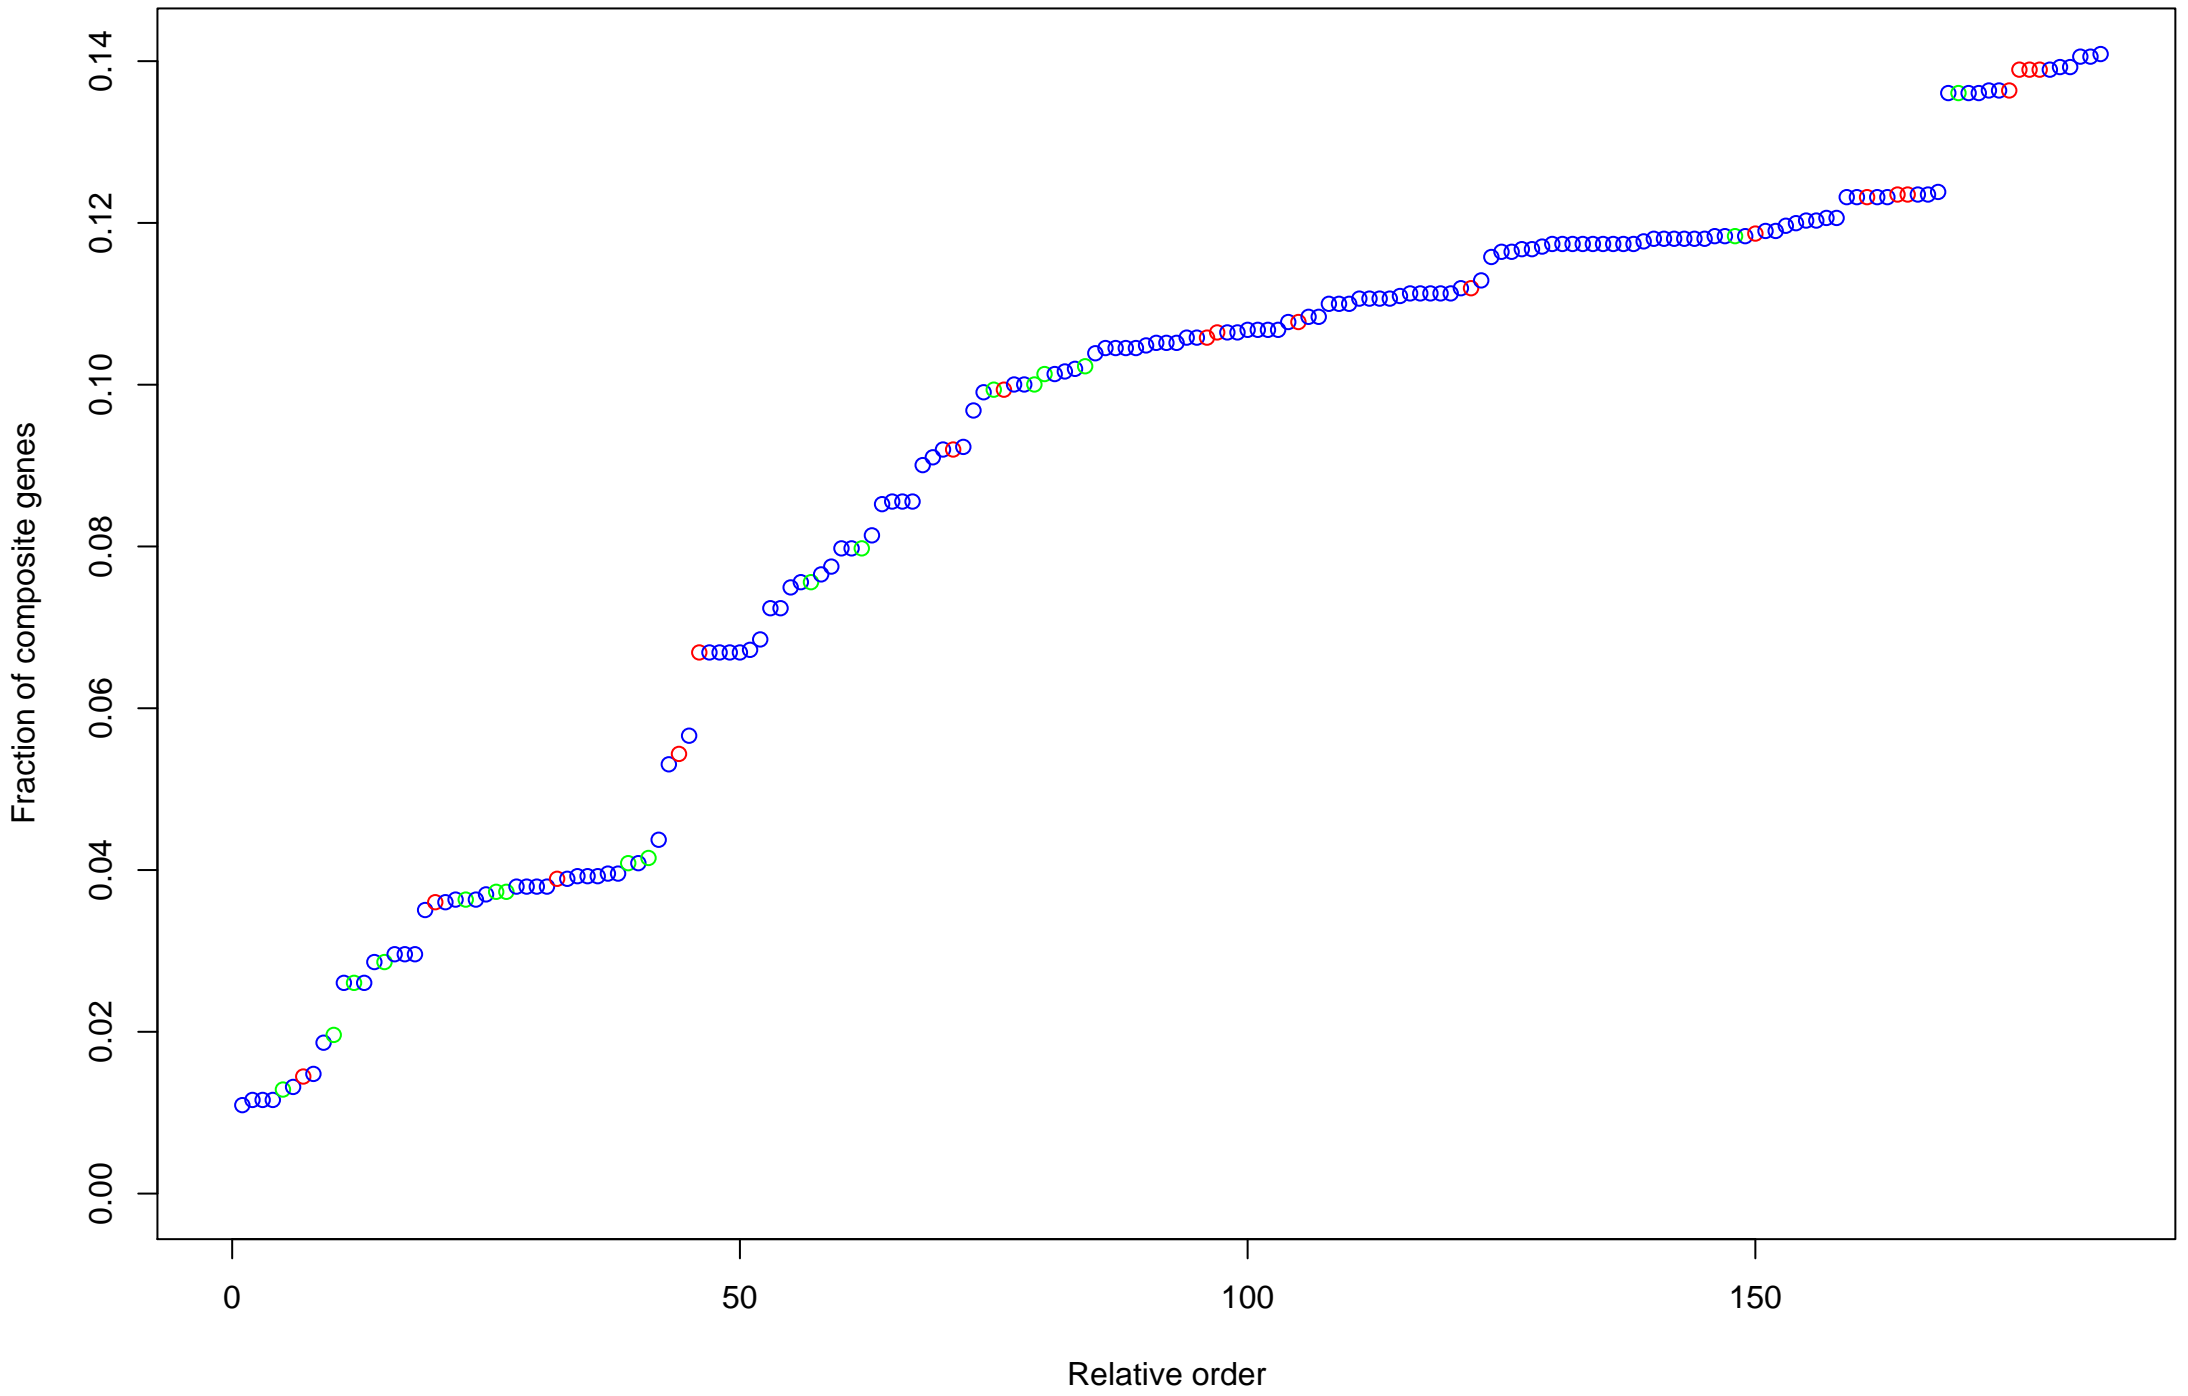

# PTOR-790-01 (*Picrophilus torridus*)

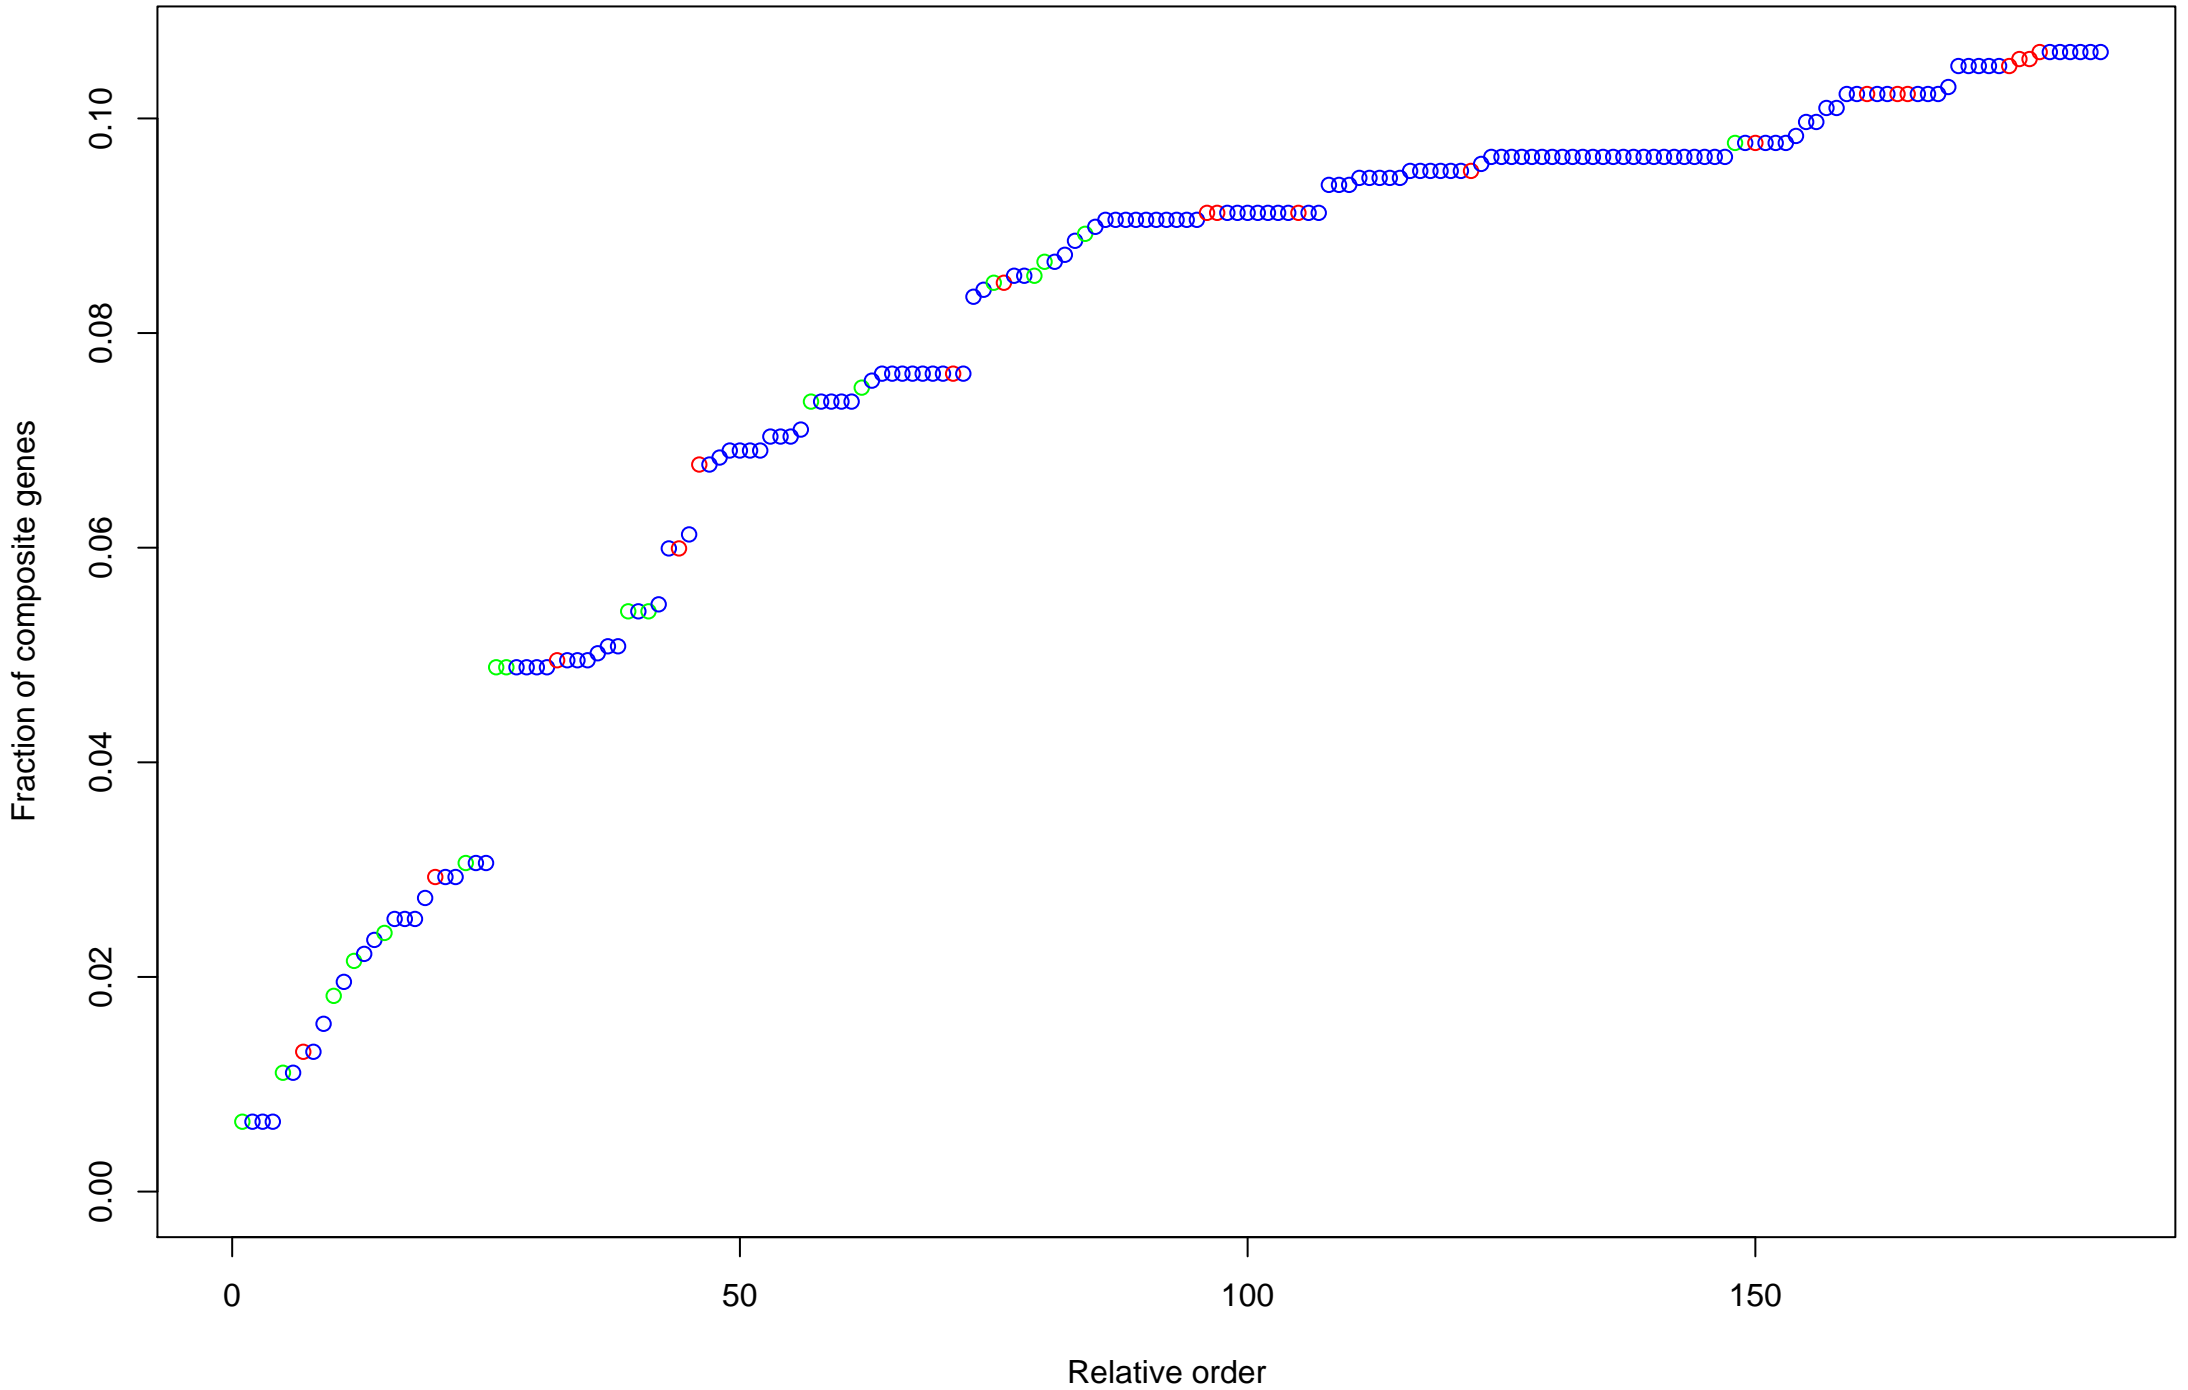

# BHEN-HOU-01 (*Bartonella henselae*)

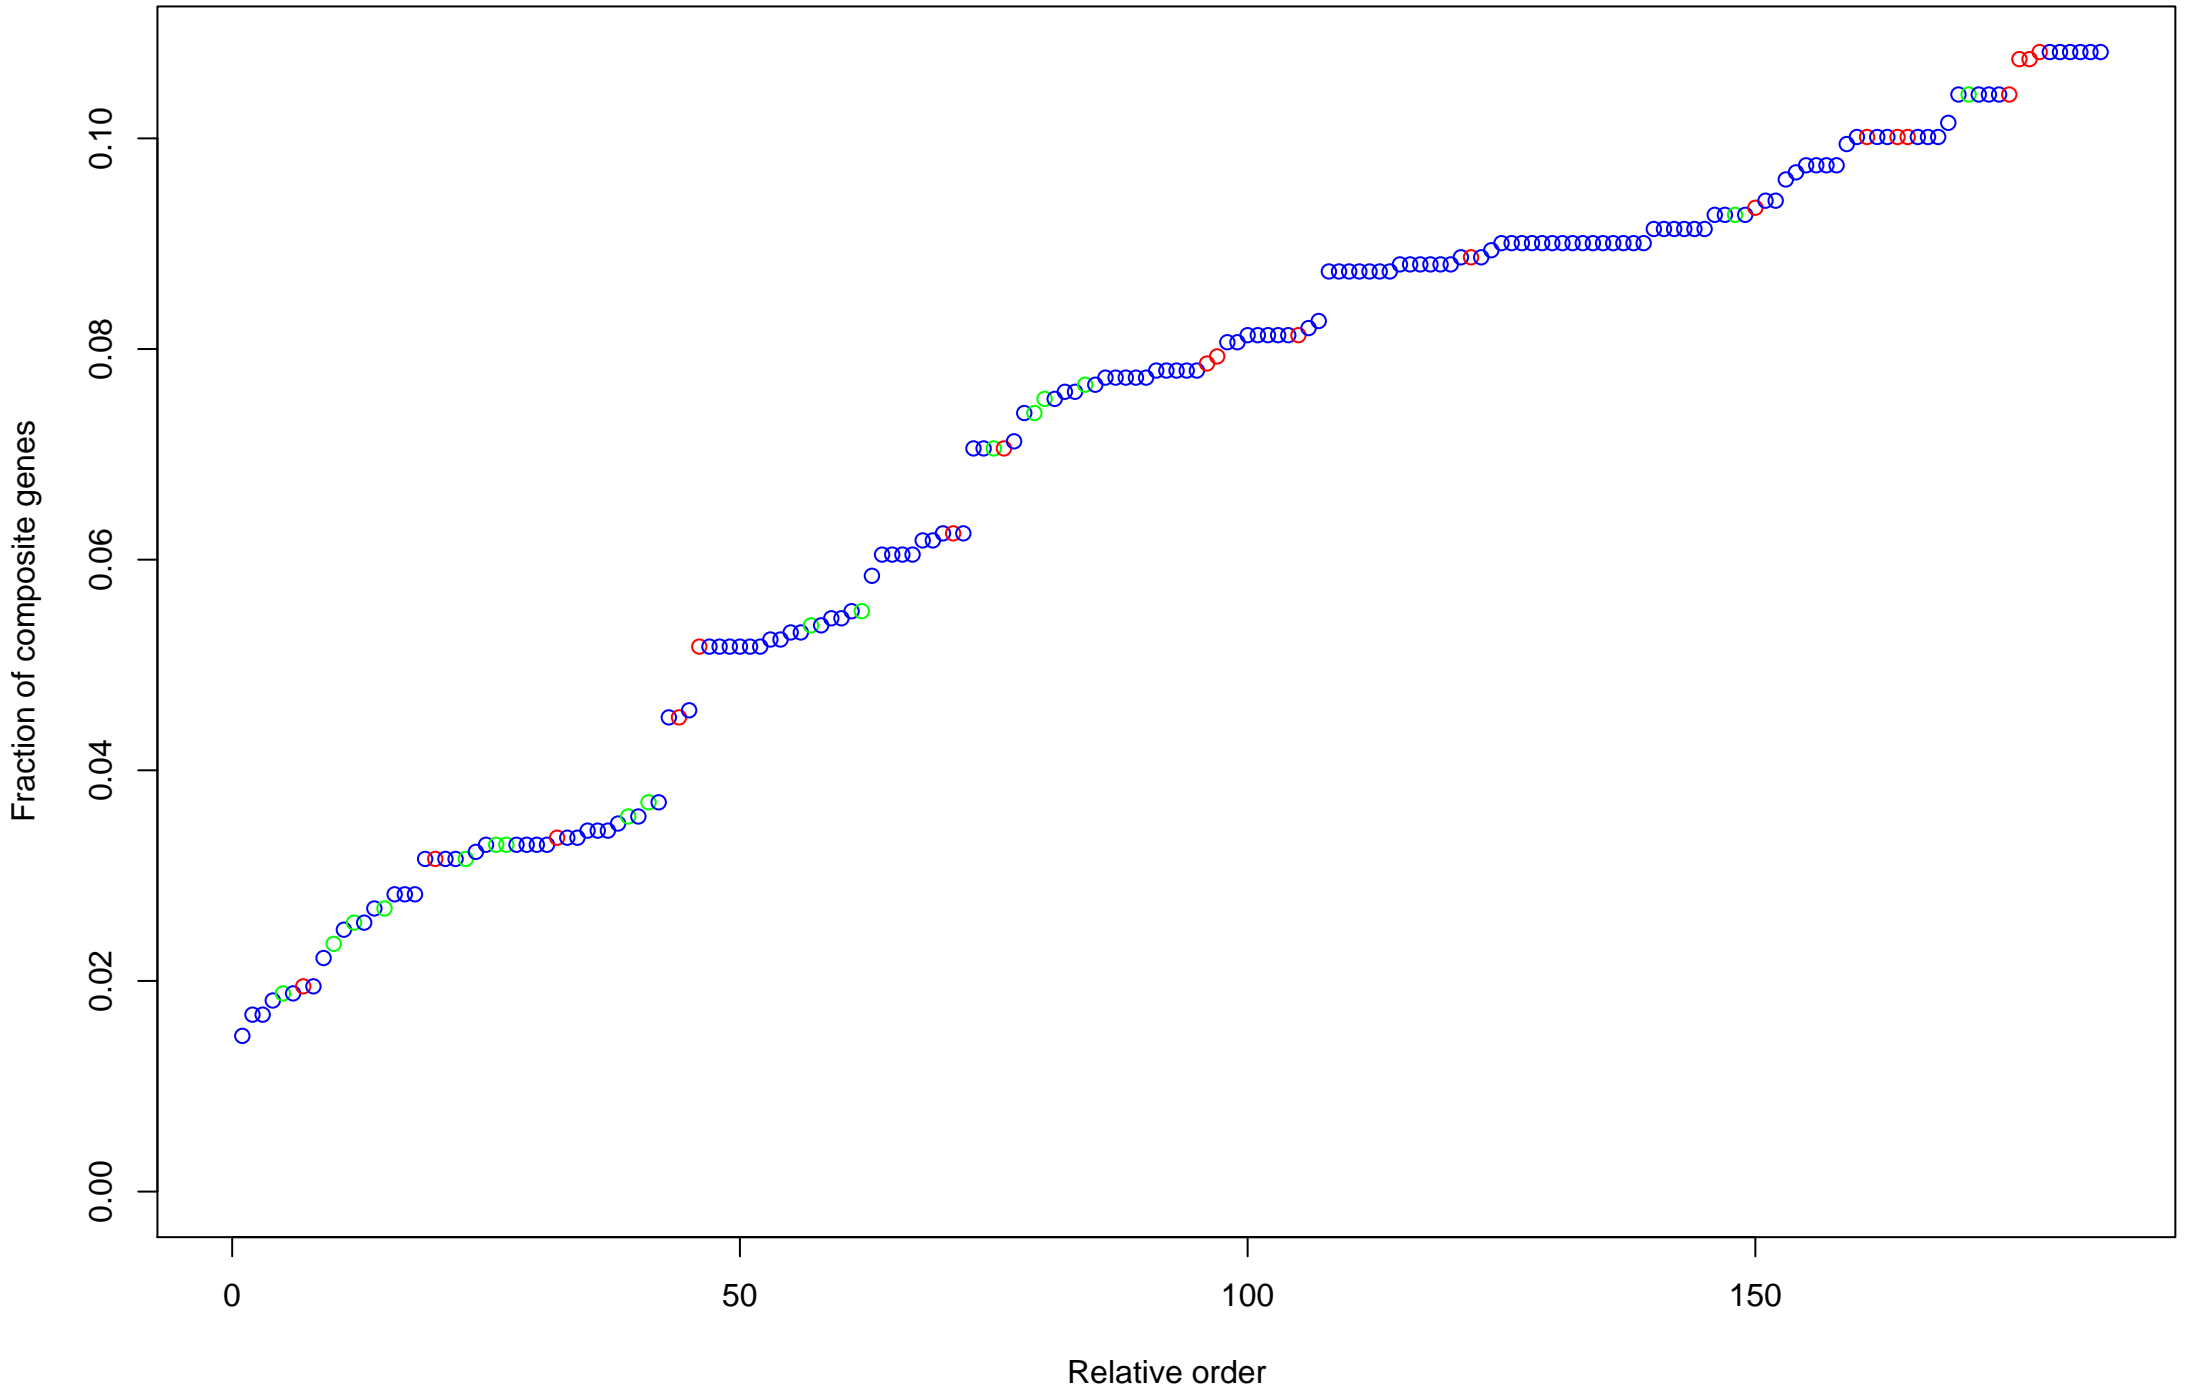

# BQUI-TOU-01 (*Bartonella quintana*)

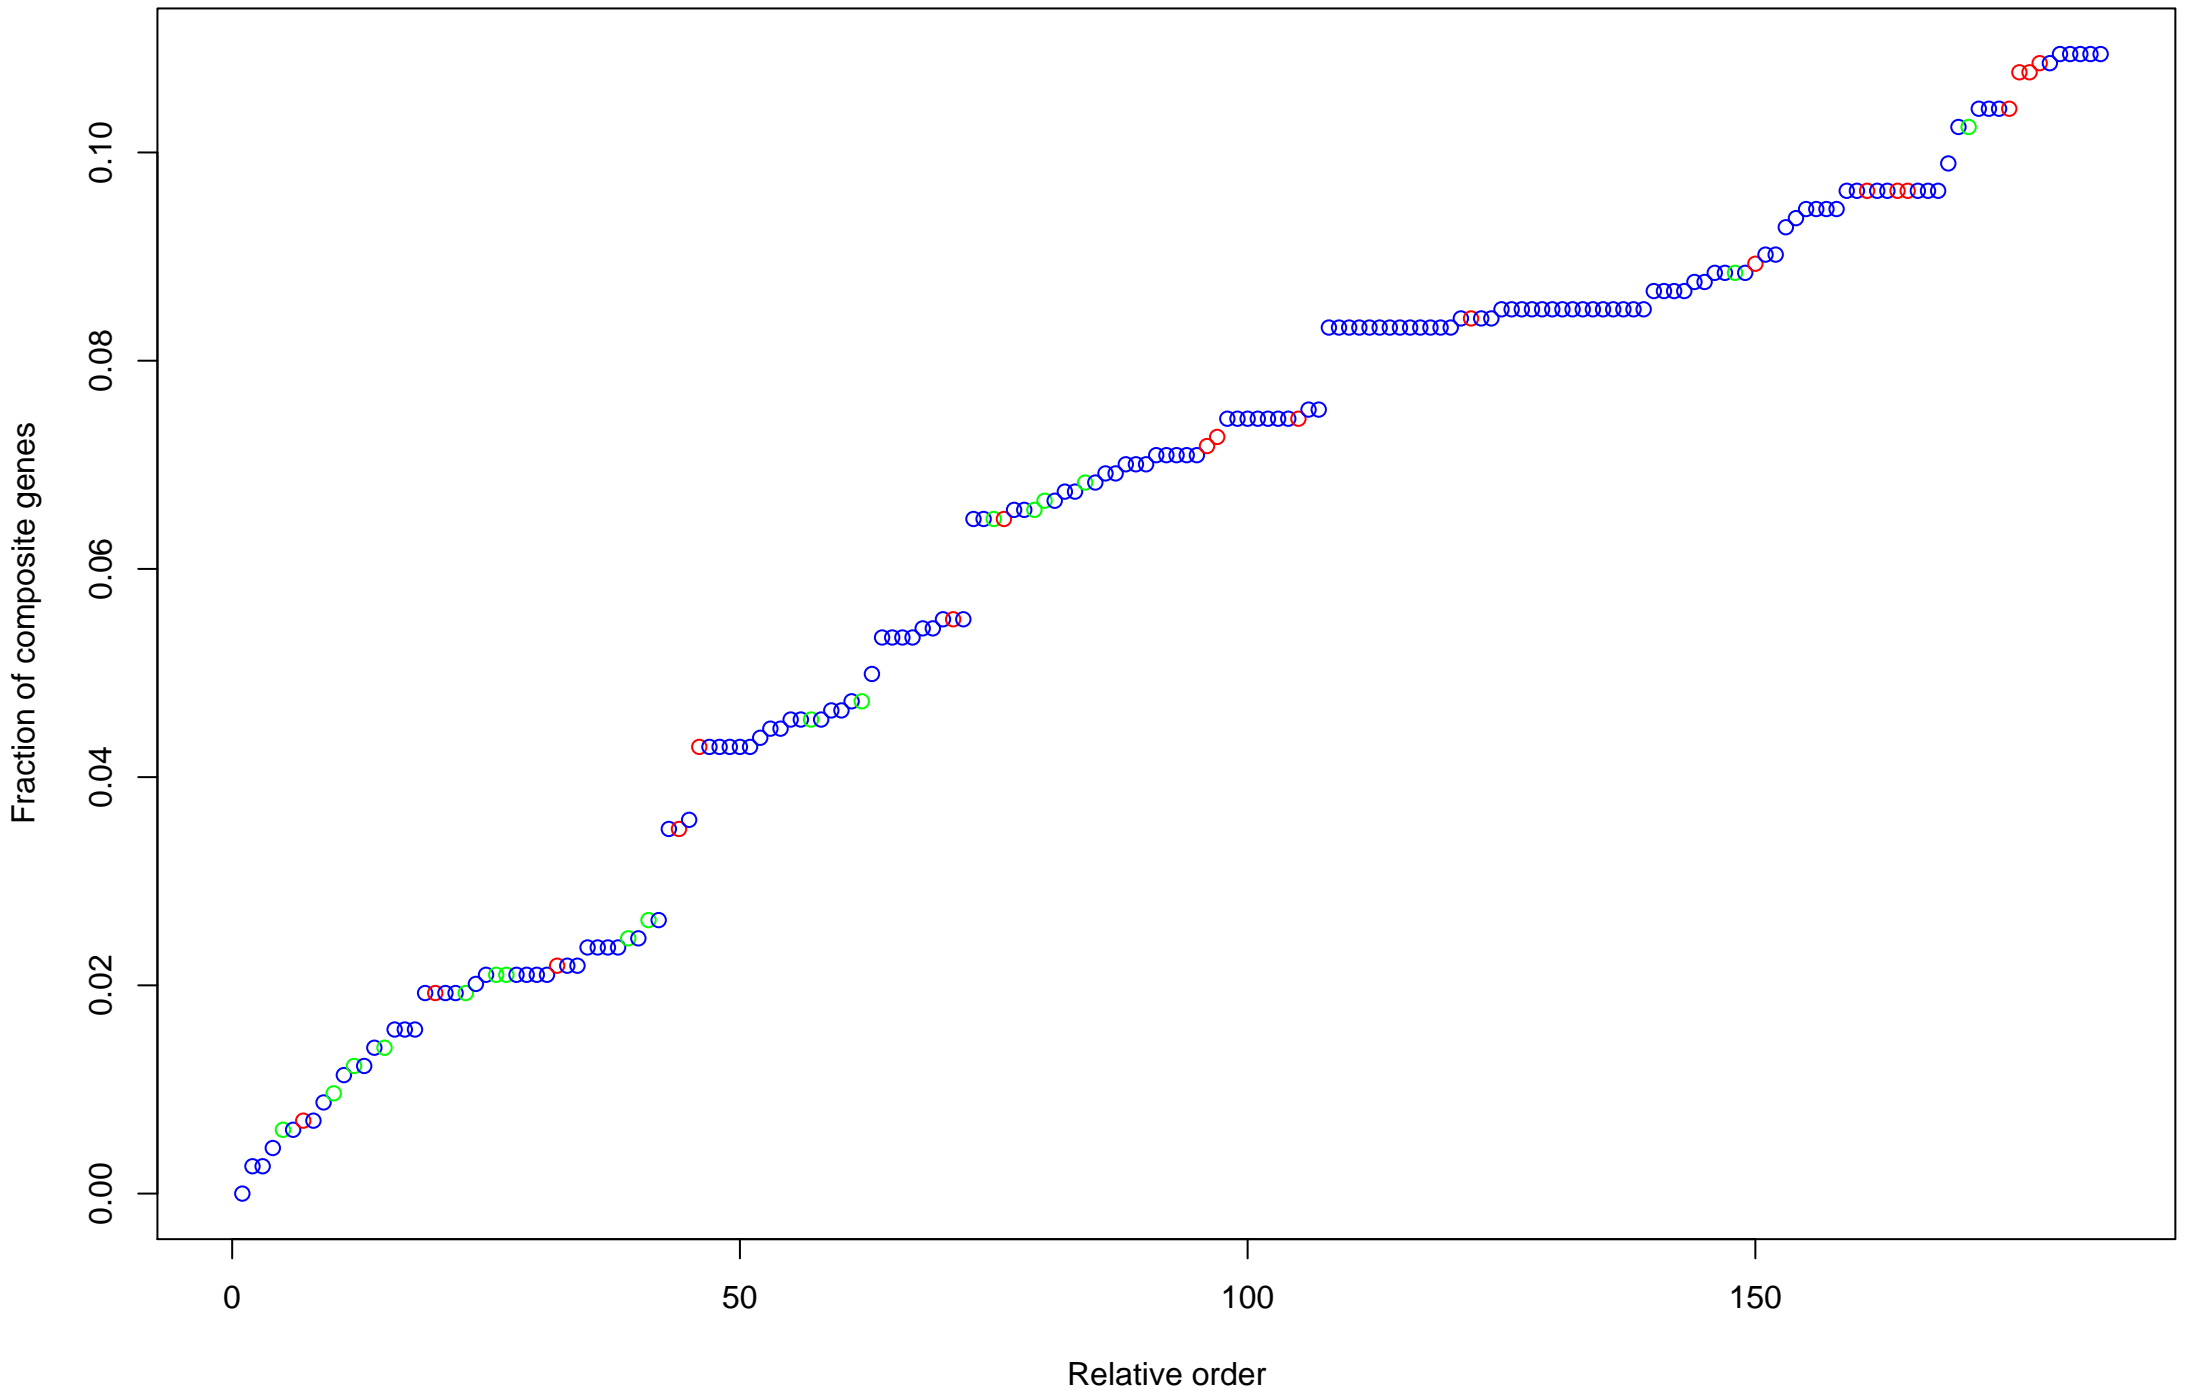

# SAUR-252-01 (Staphylococcus aureus)

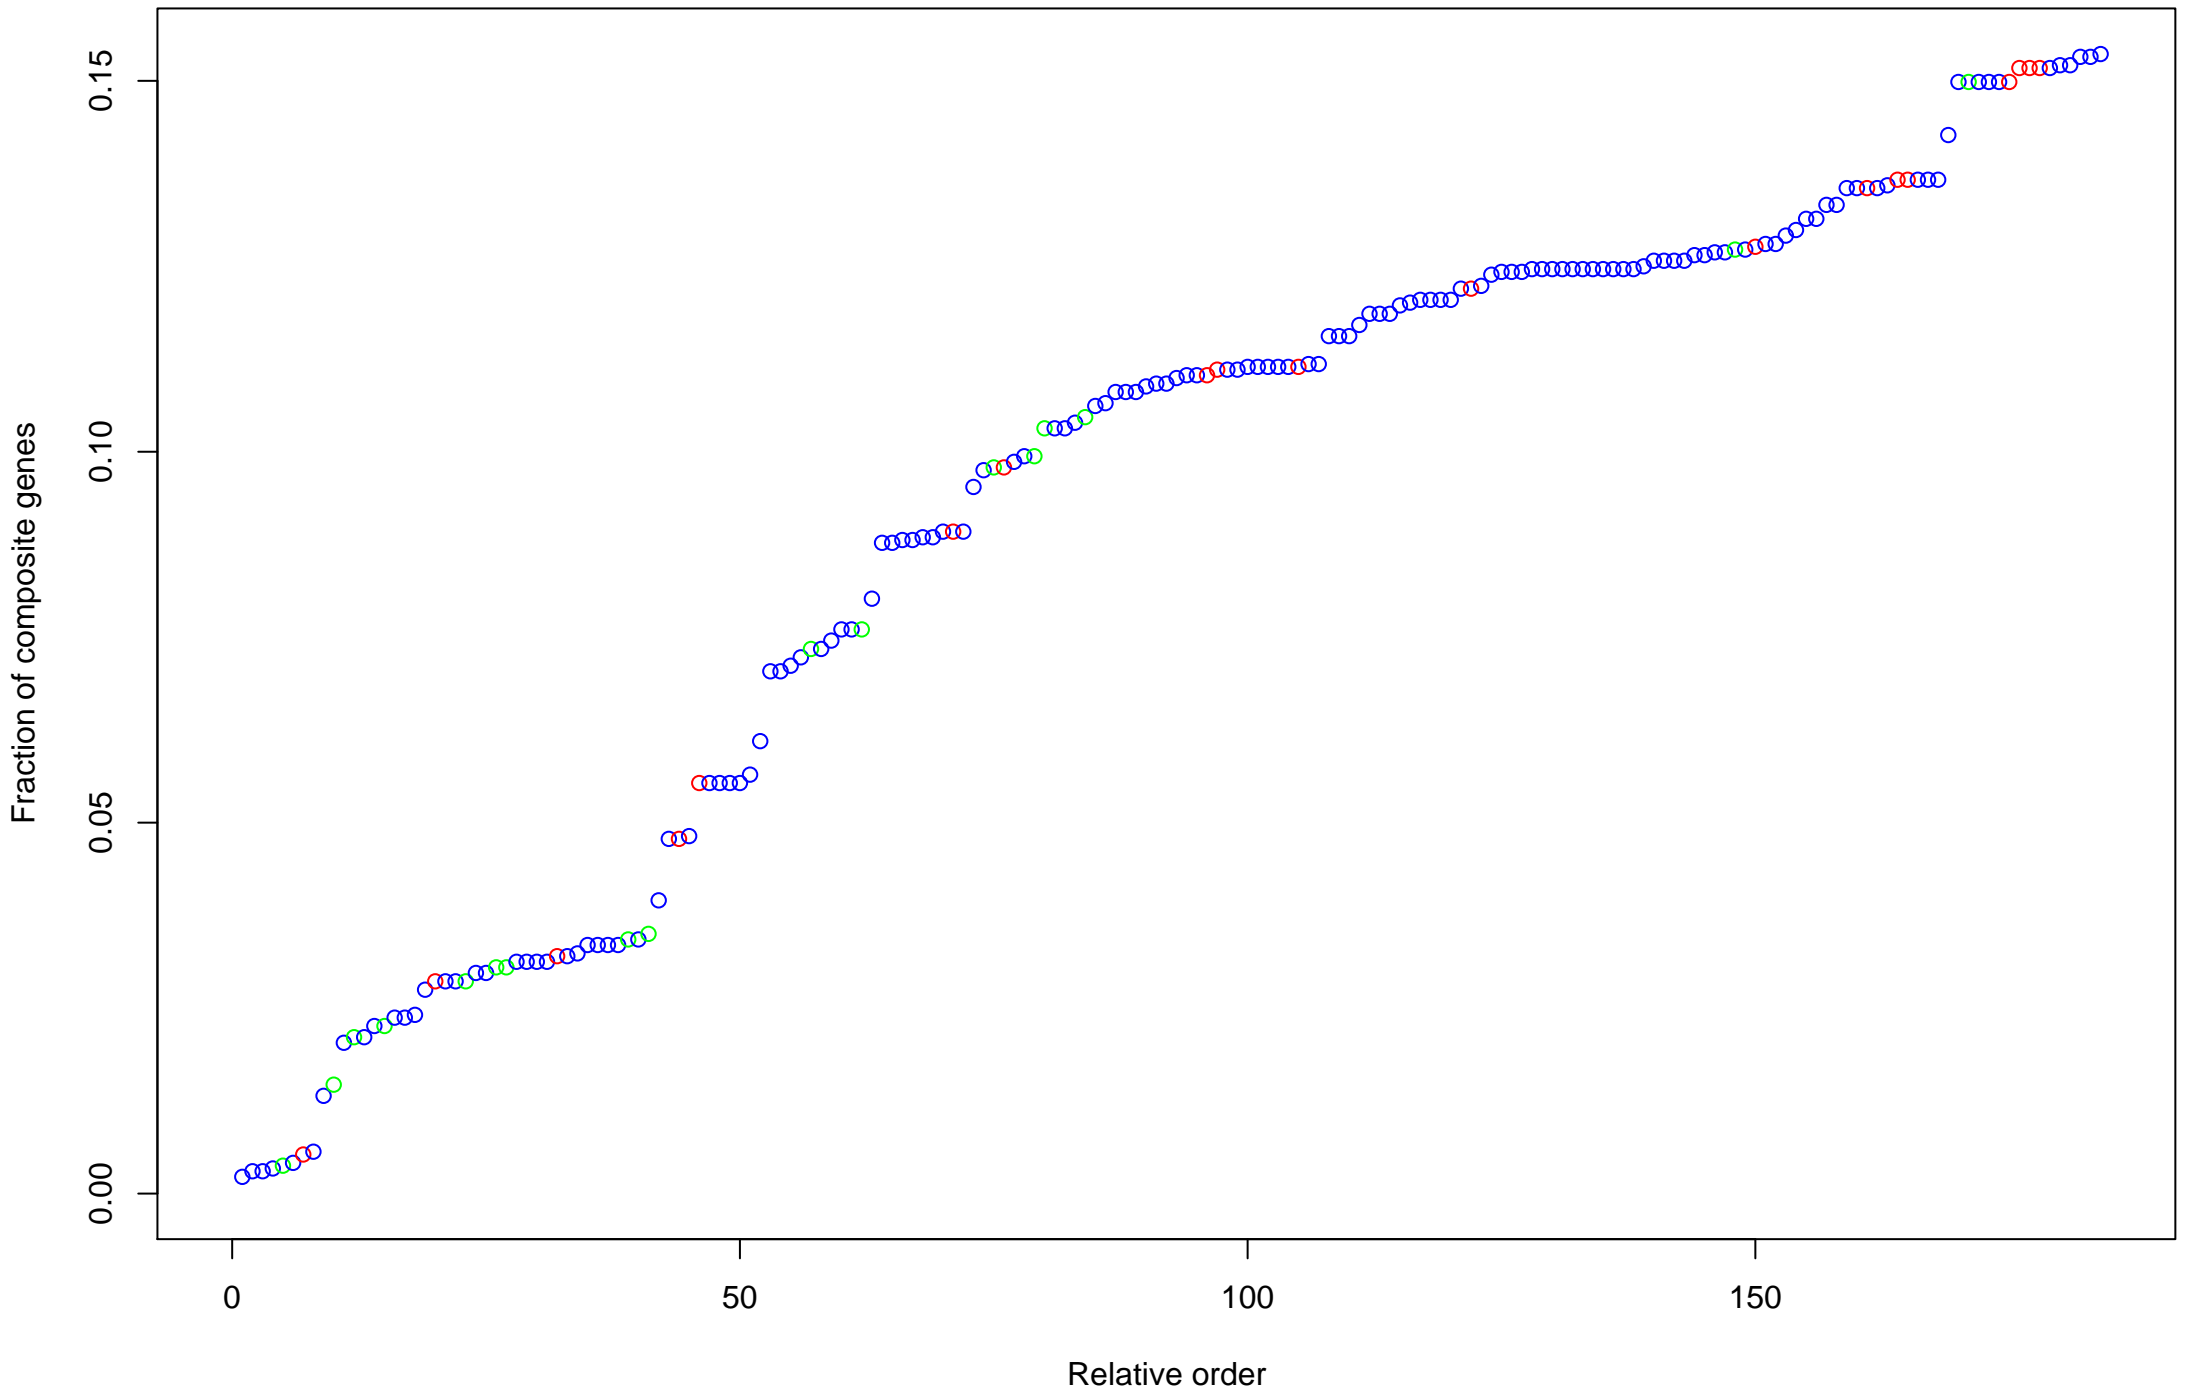

# SAUR-476-01 (*Staphylococcus aureus*)

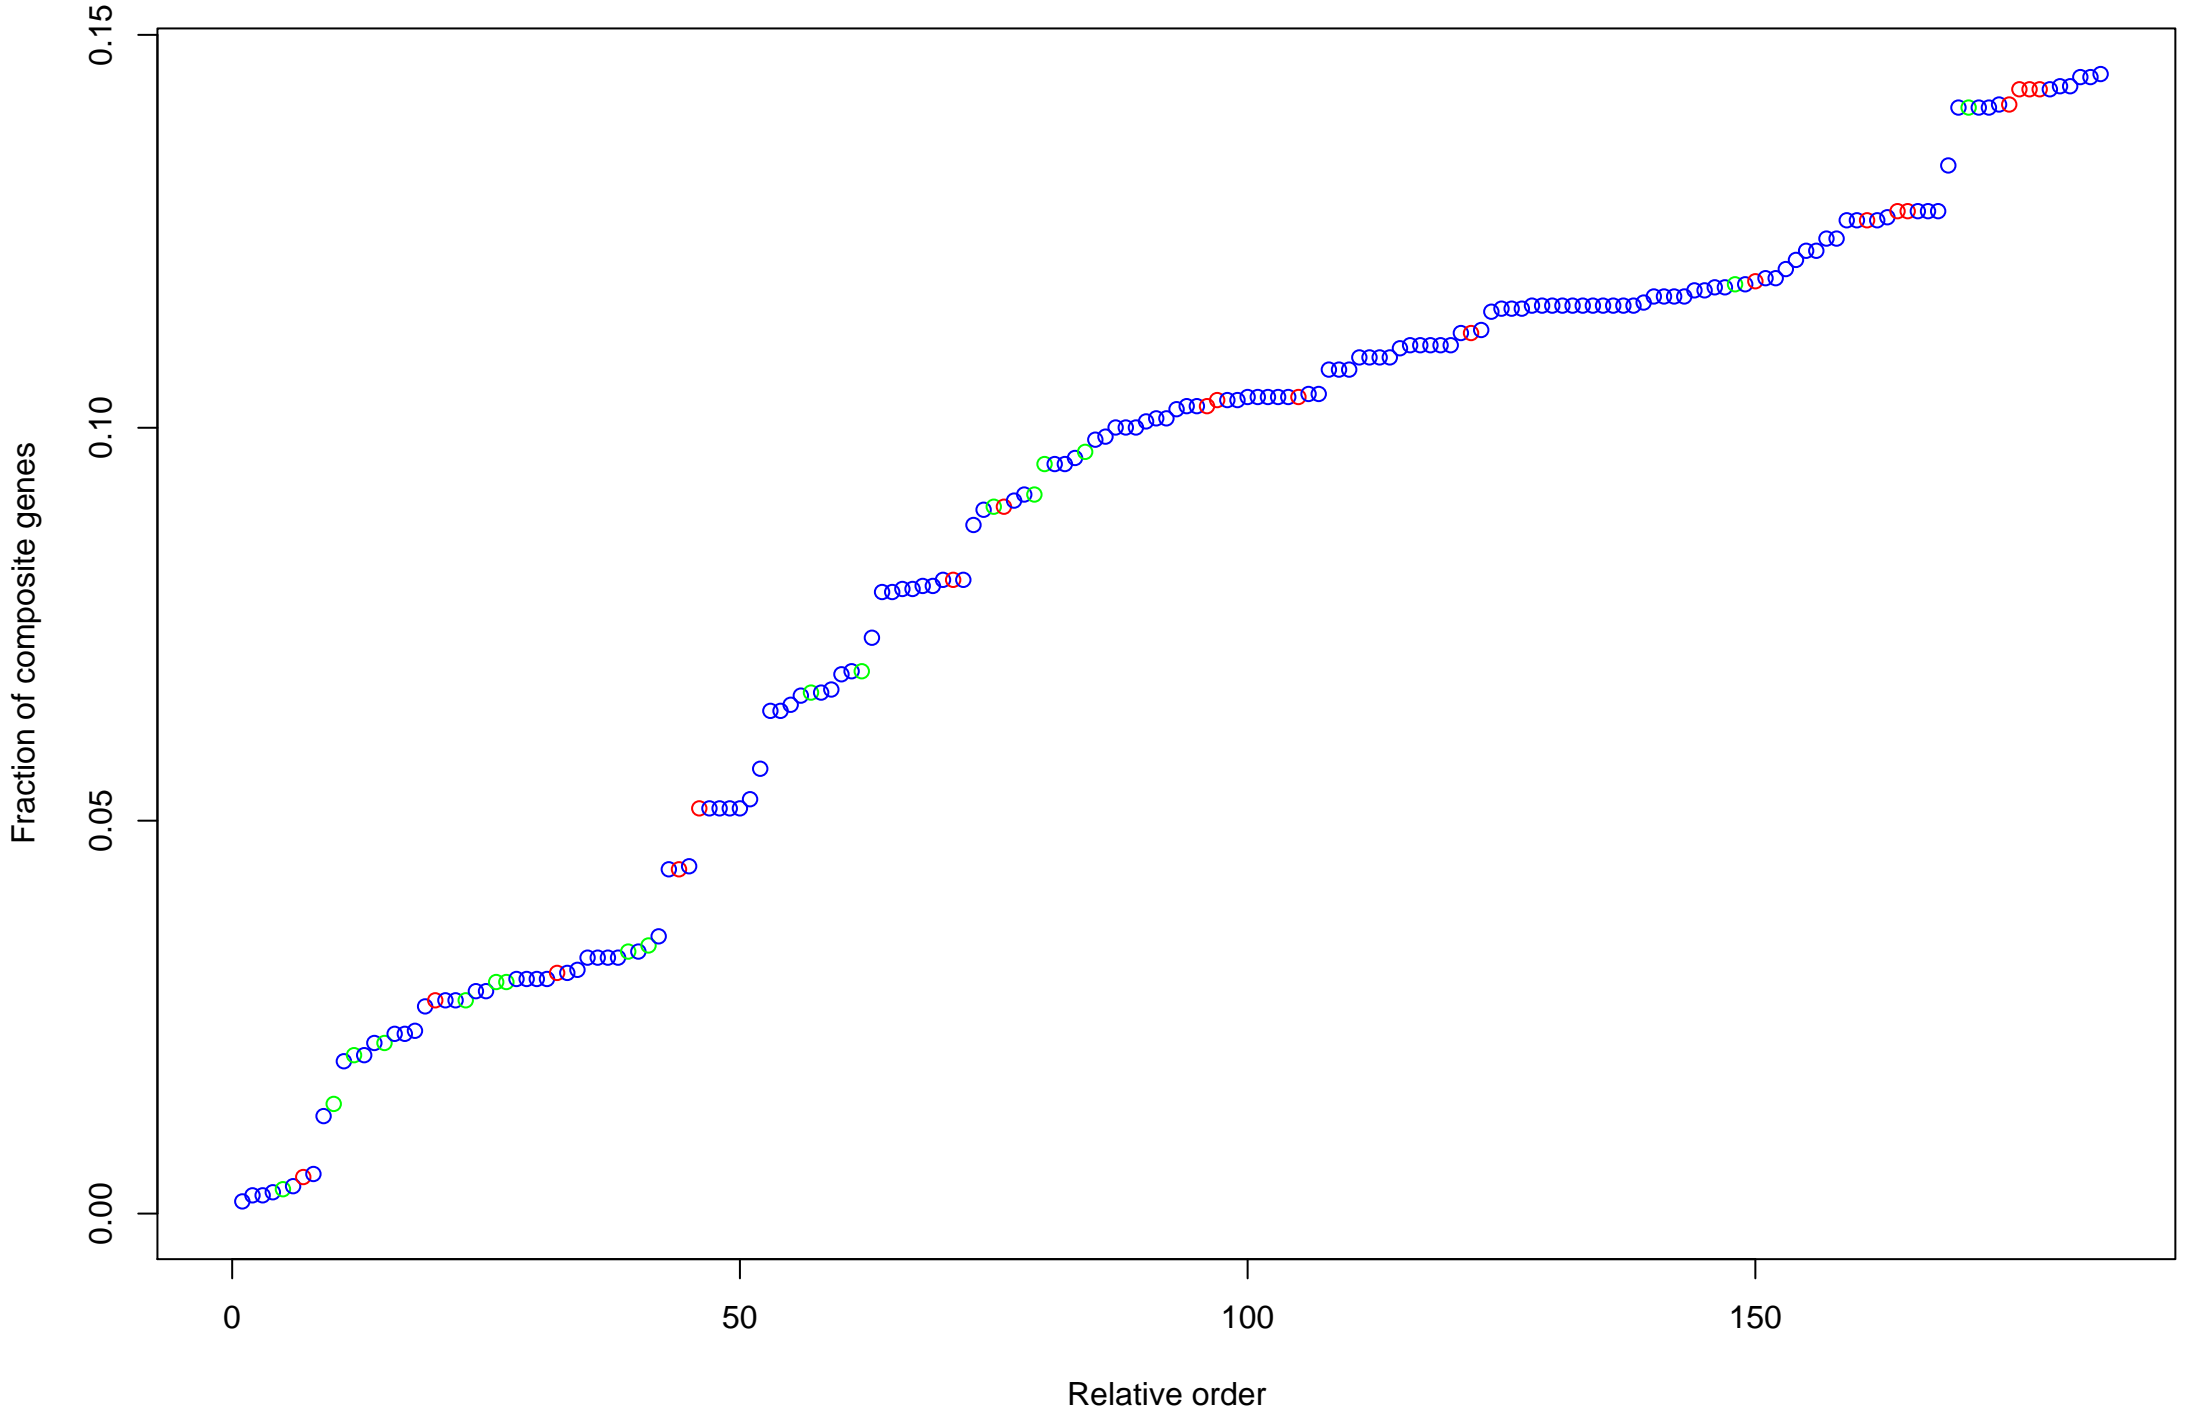

# CGLA-138-01 (*Candida glabrata*)

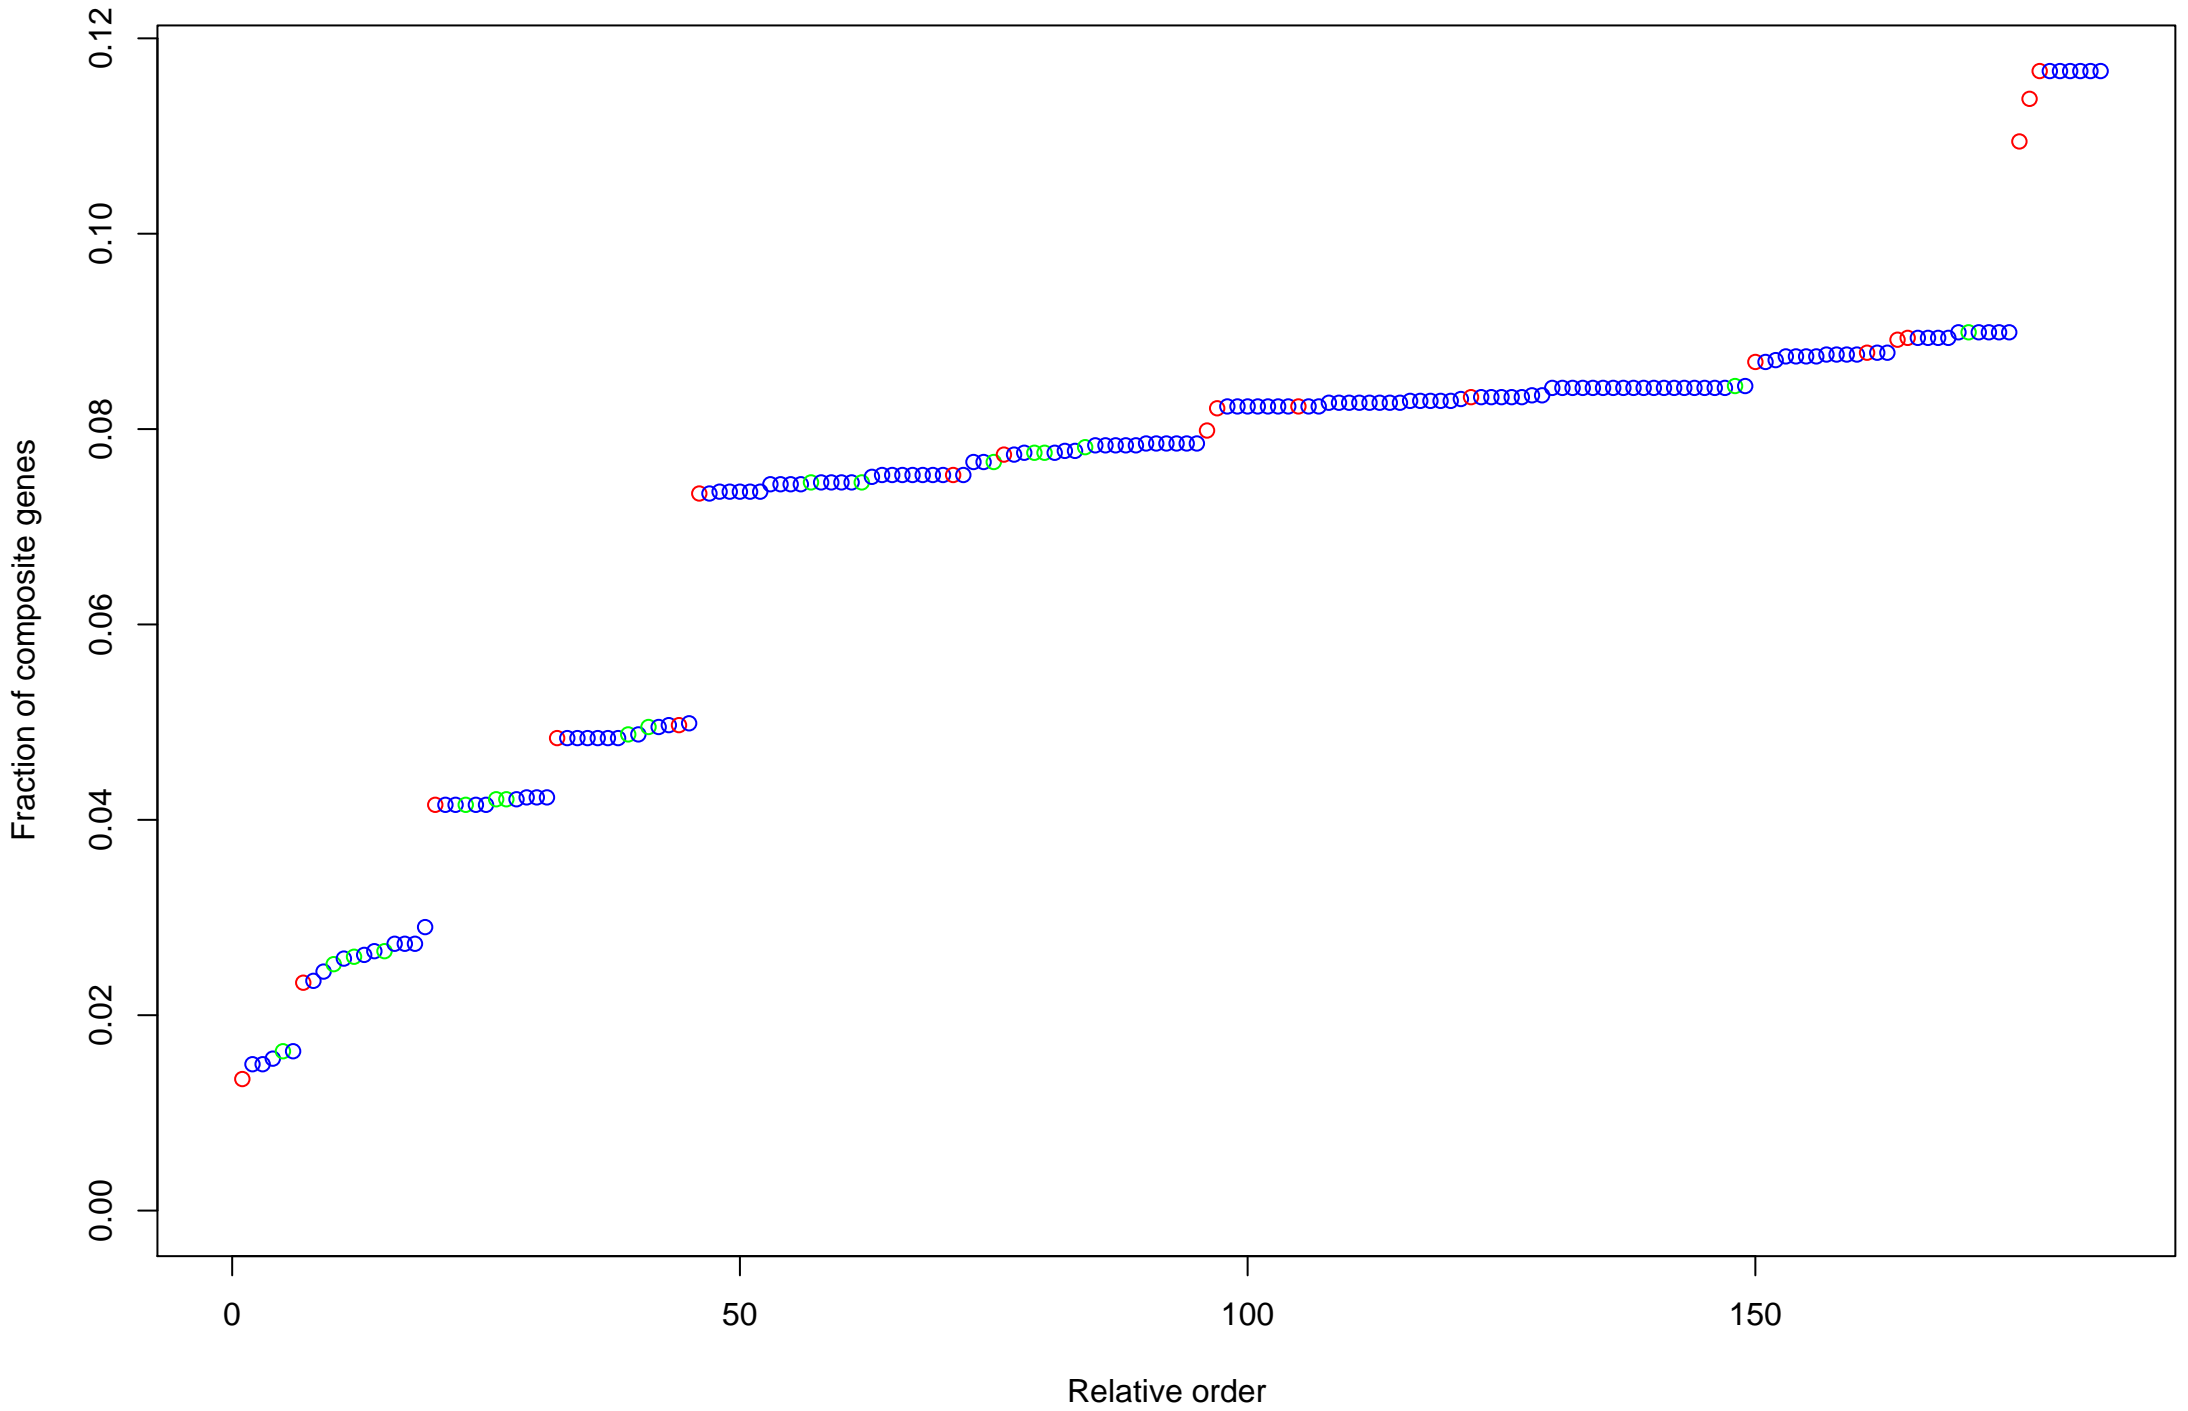

# DHAN-767-01 (*Debaryomyces hansenii* var. *hansenii*)

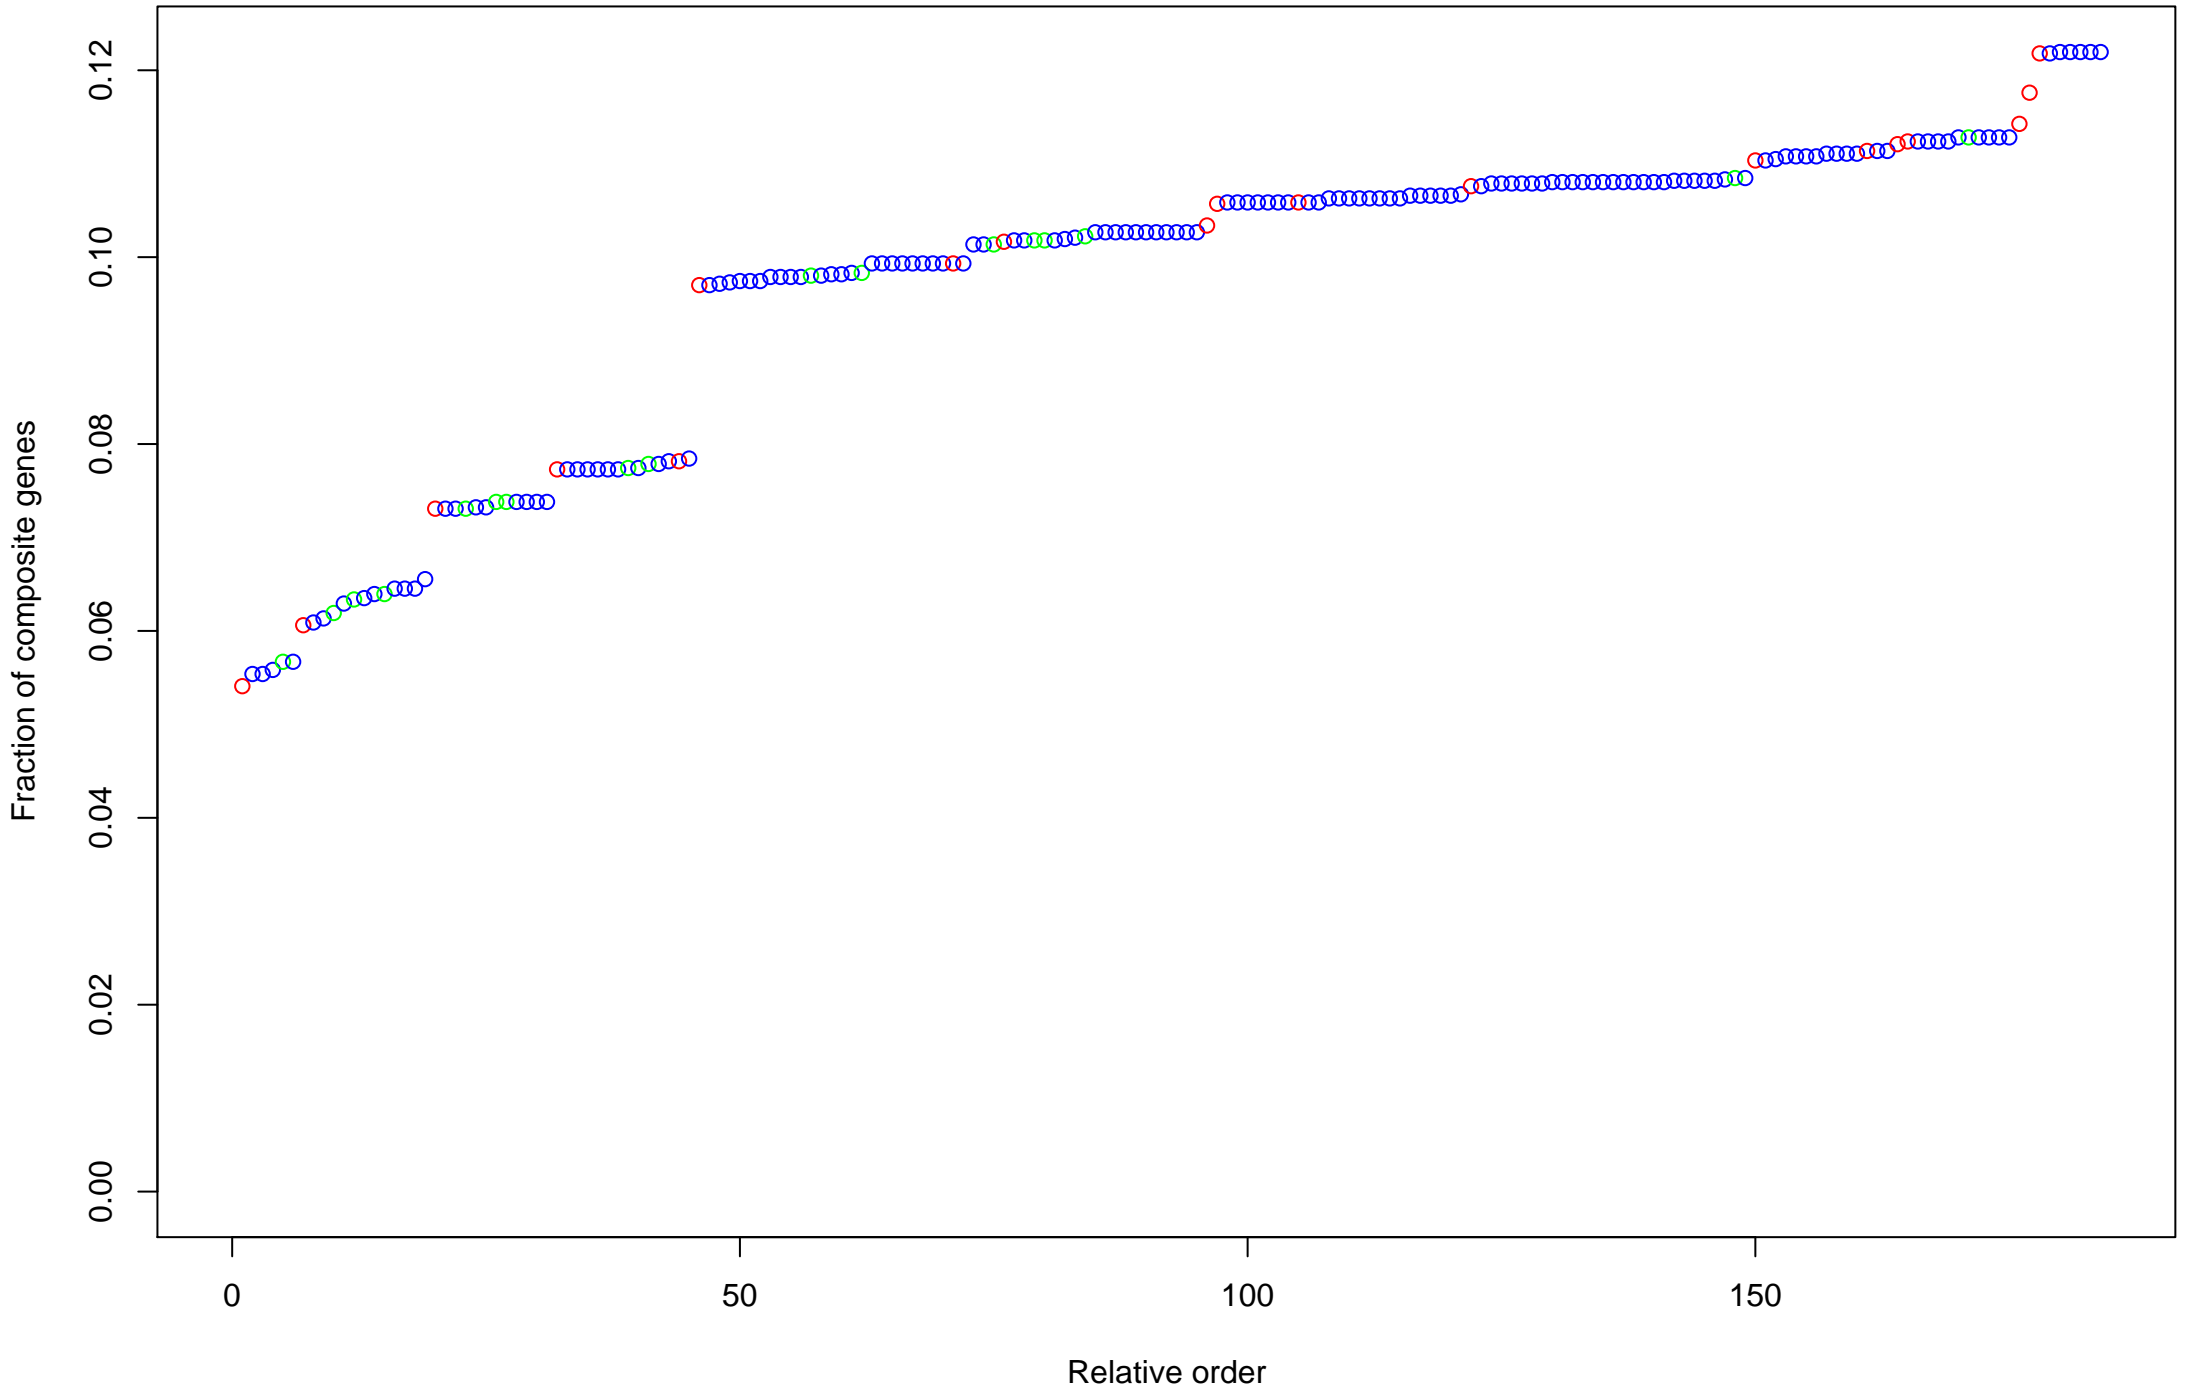



# KLAC-210-01 (*Kluyveromyces lactis*)

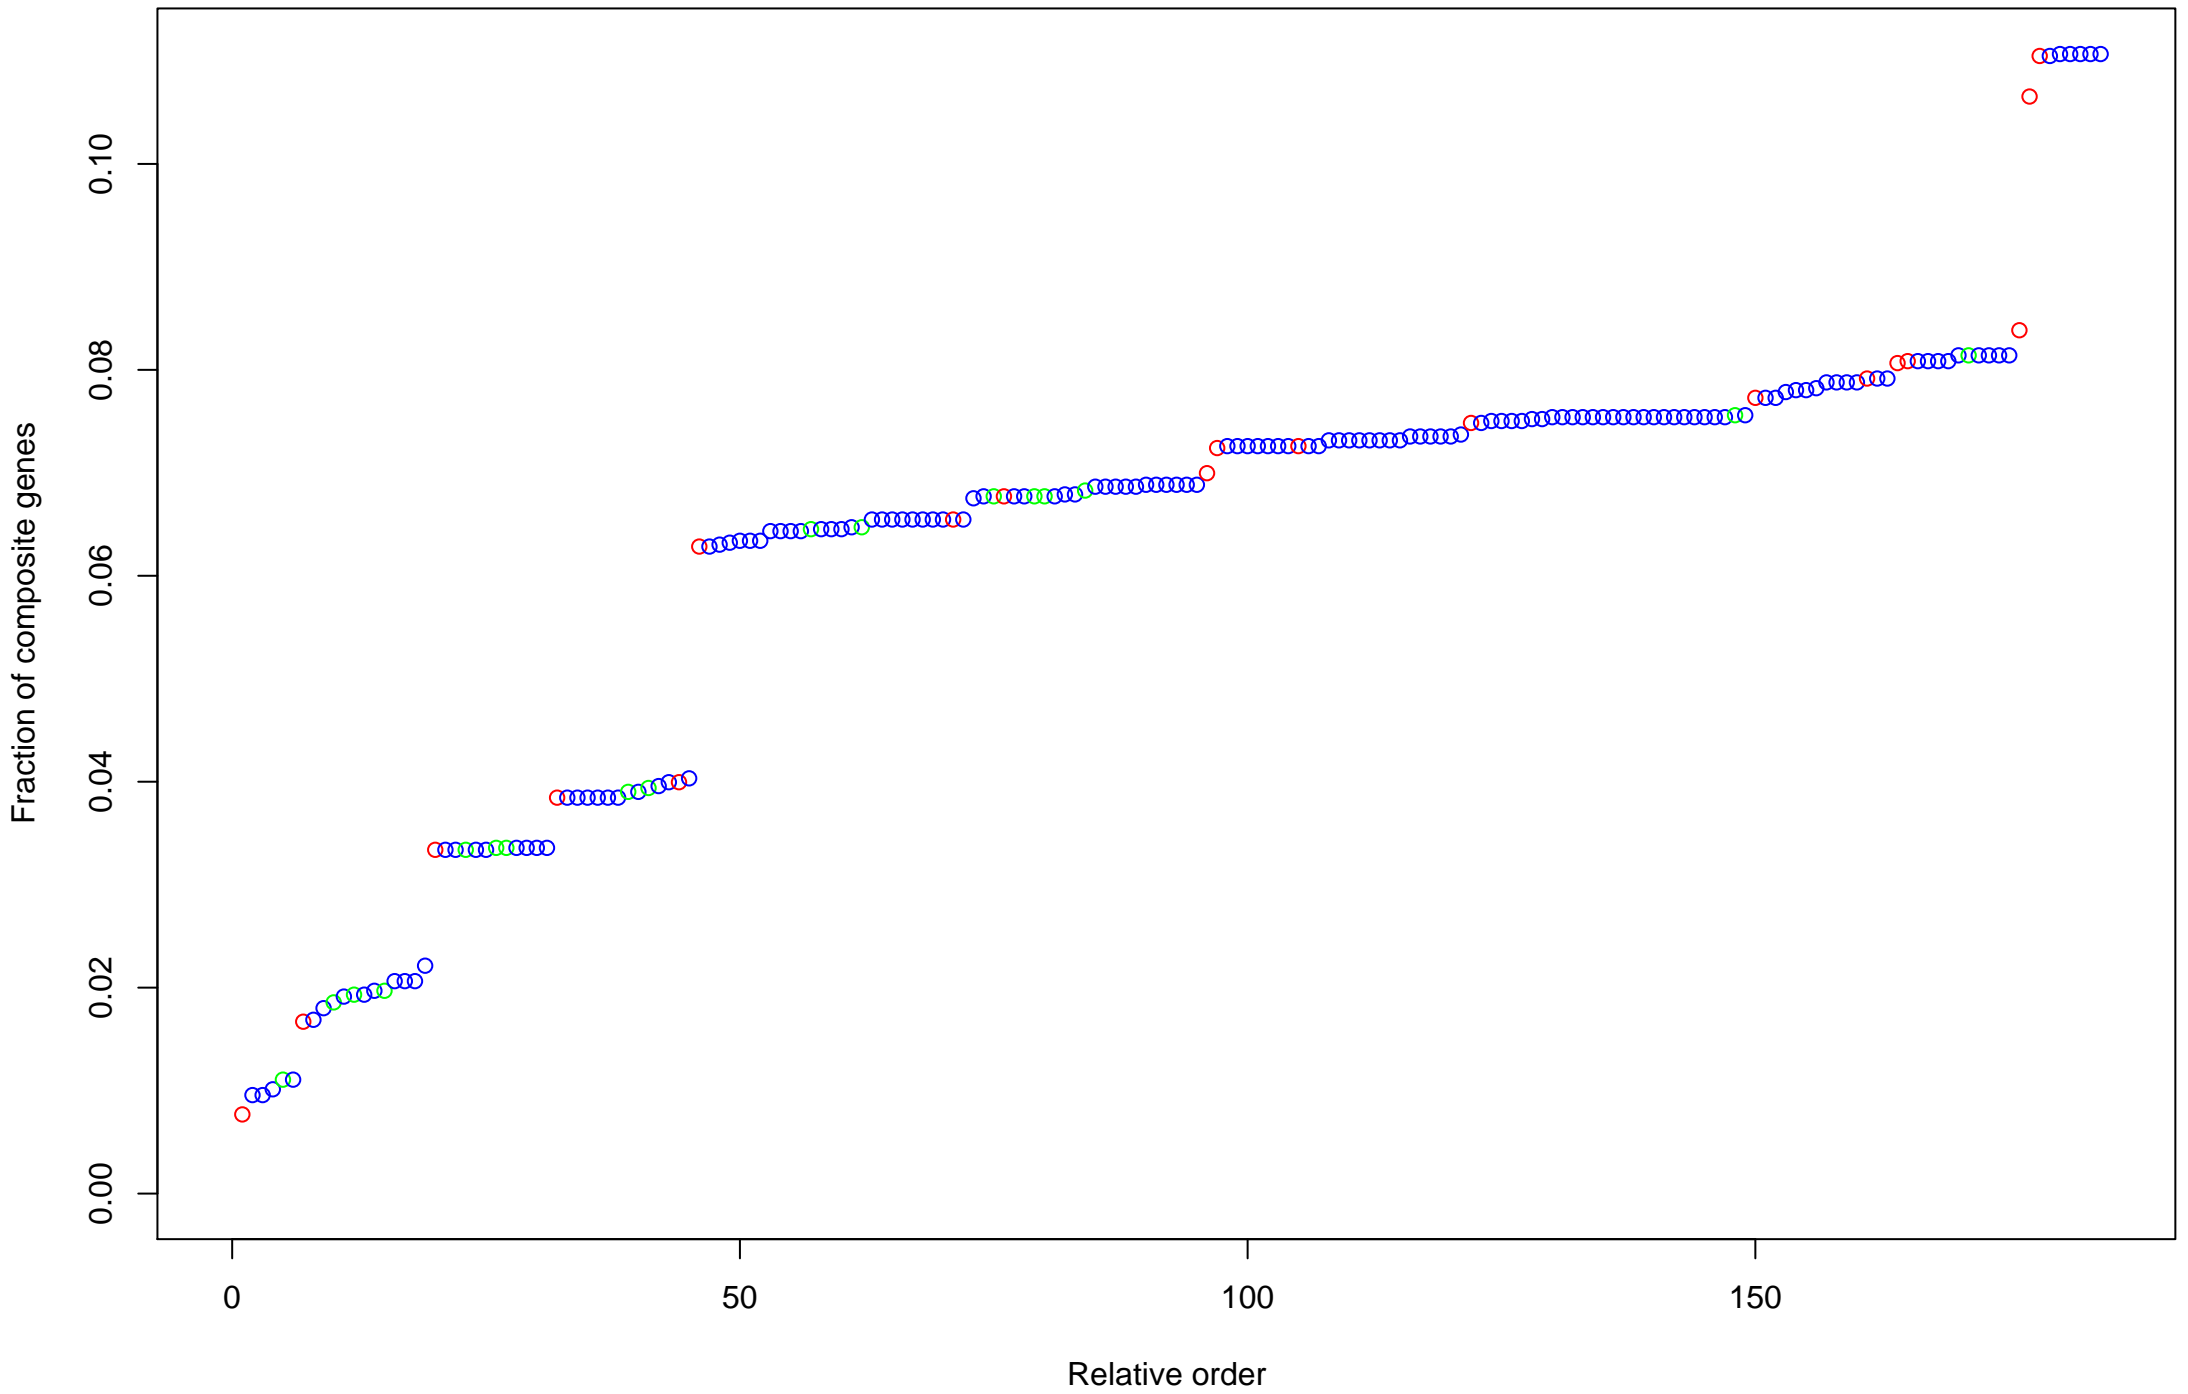

# YLIP-B99-01 (*Yarrowia lipolytica*)

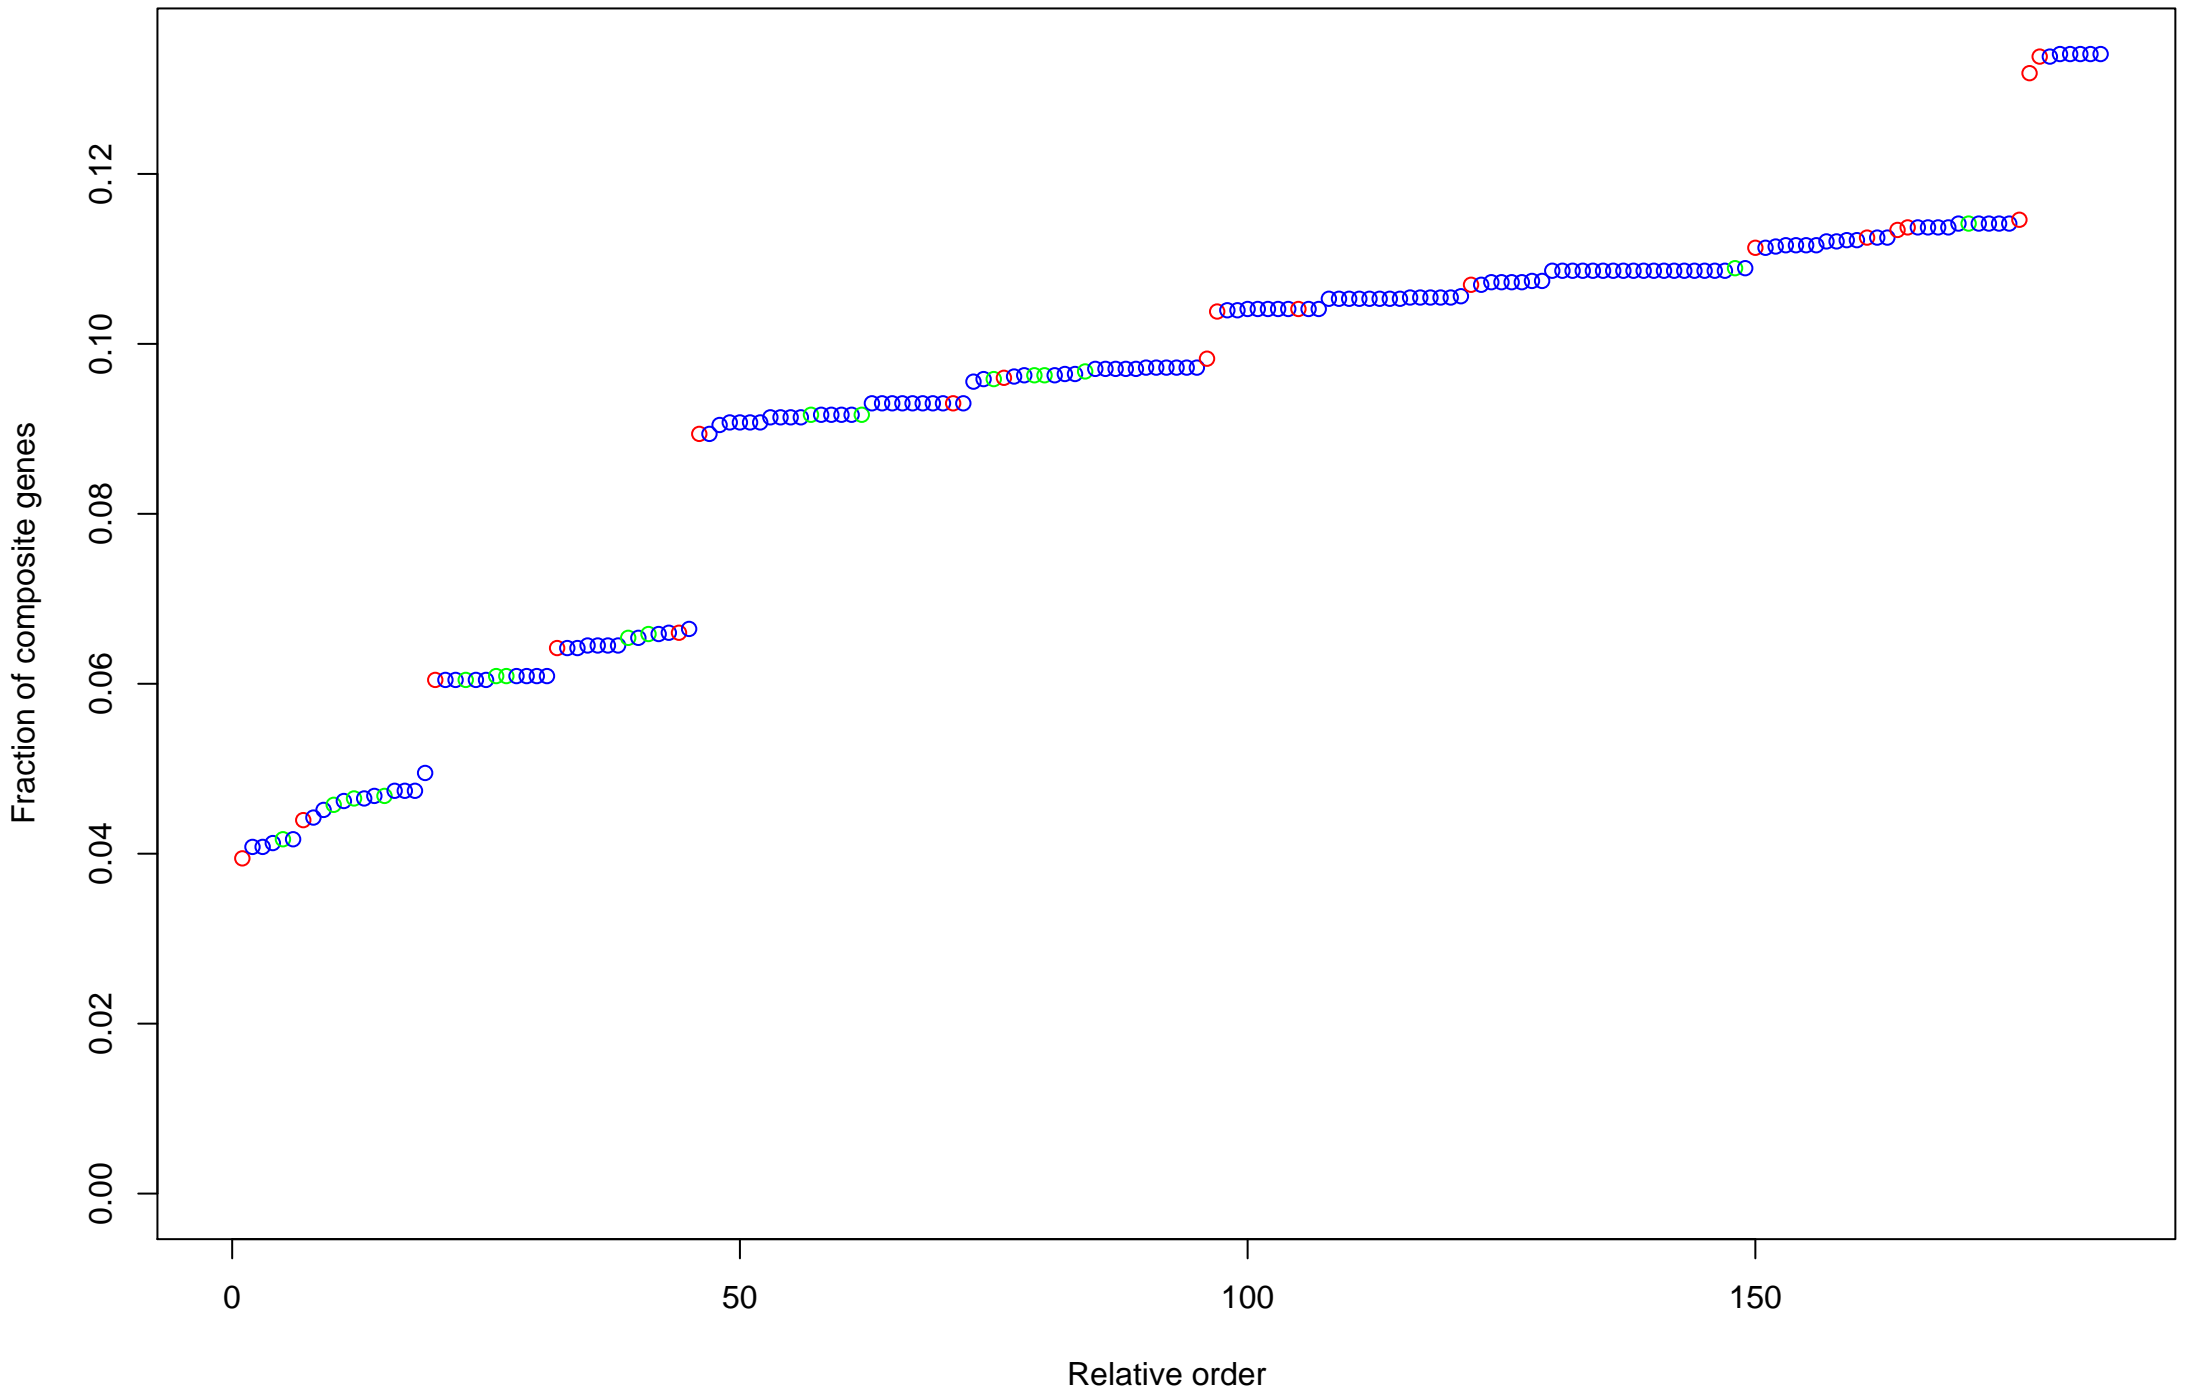

# ECAR-043-01 (*Erwinia carotovora* subsp. *atroseptica*)

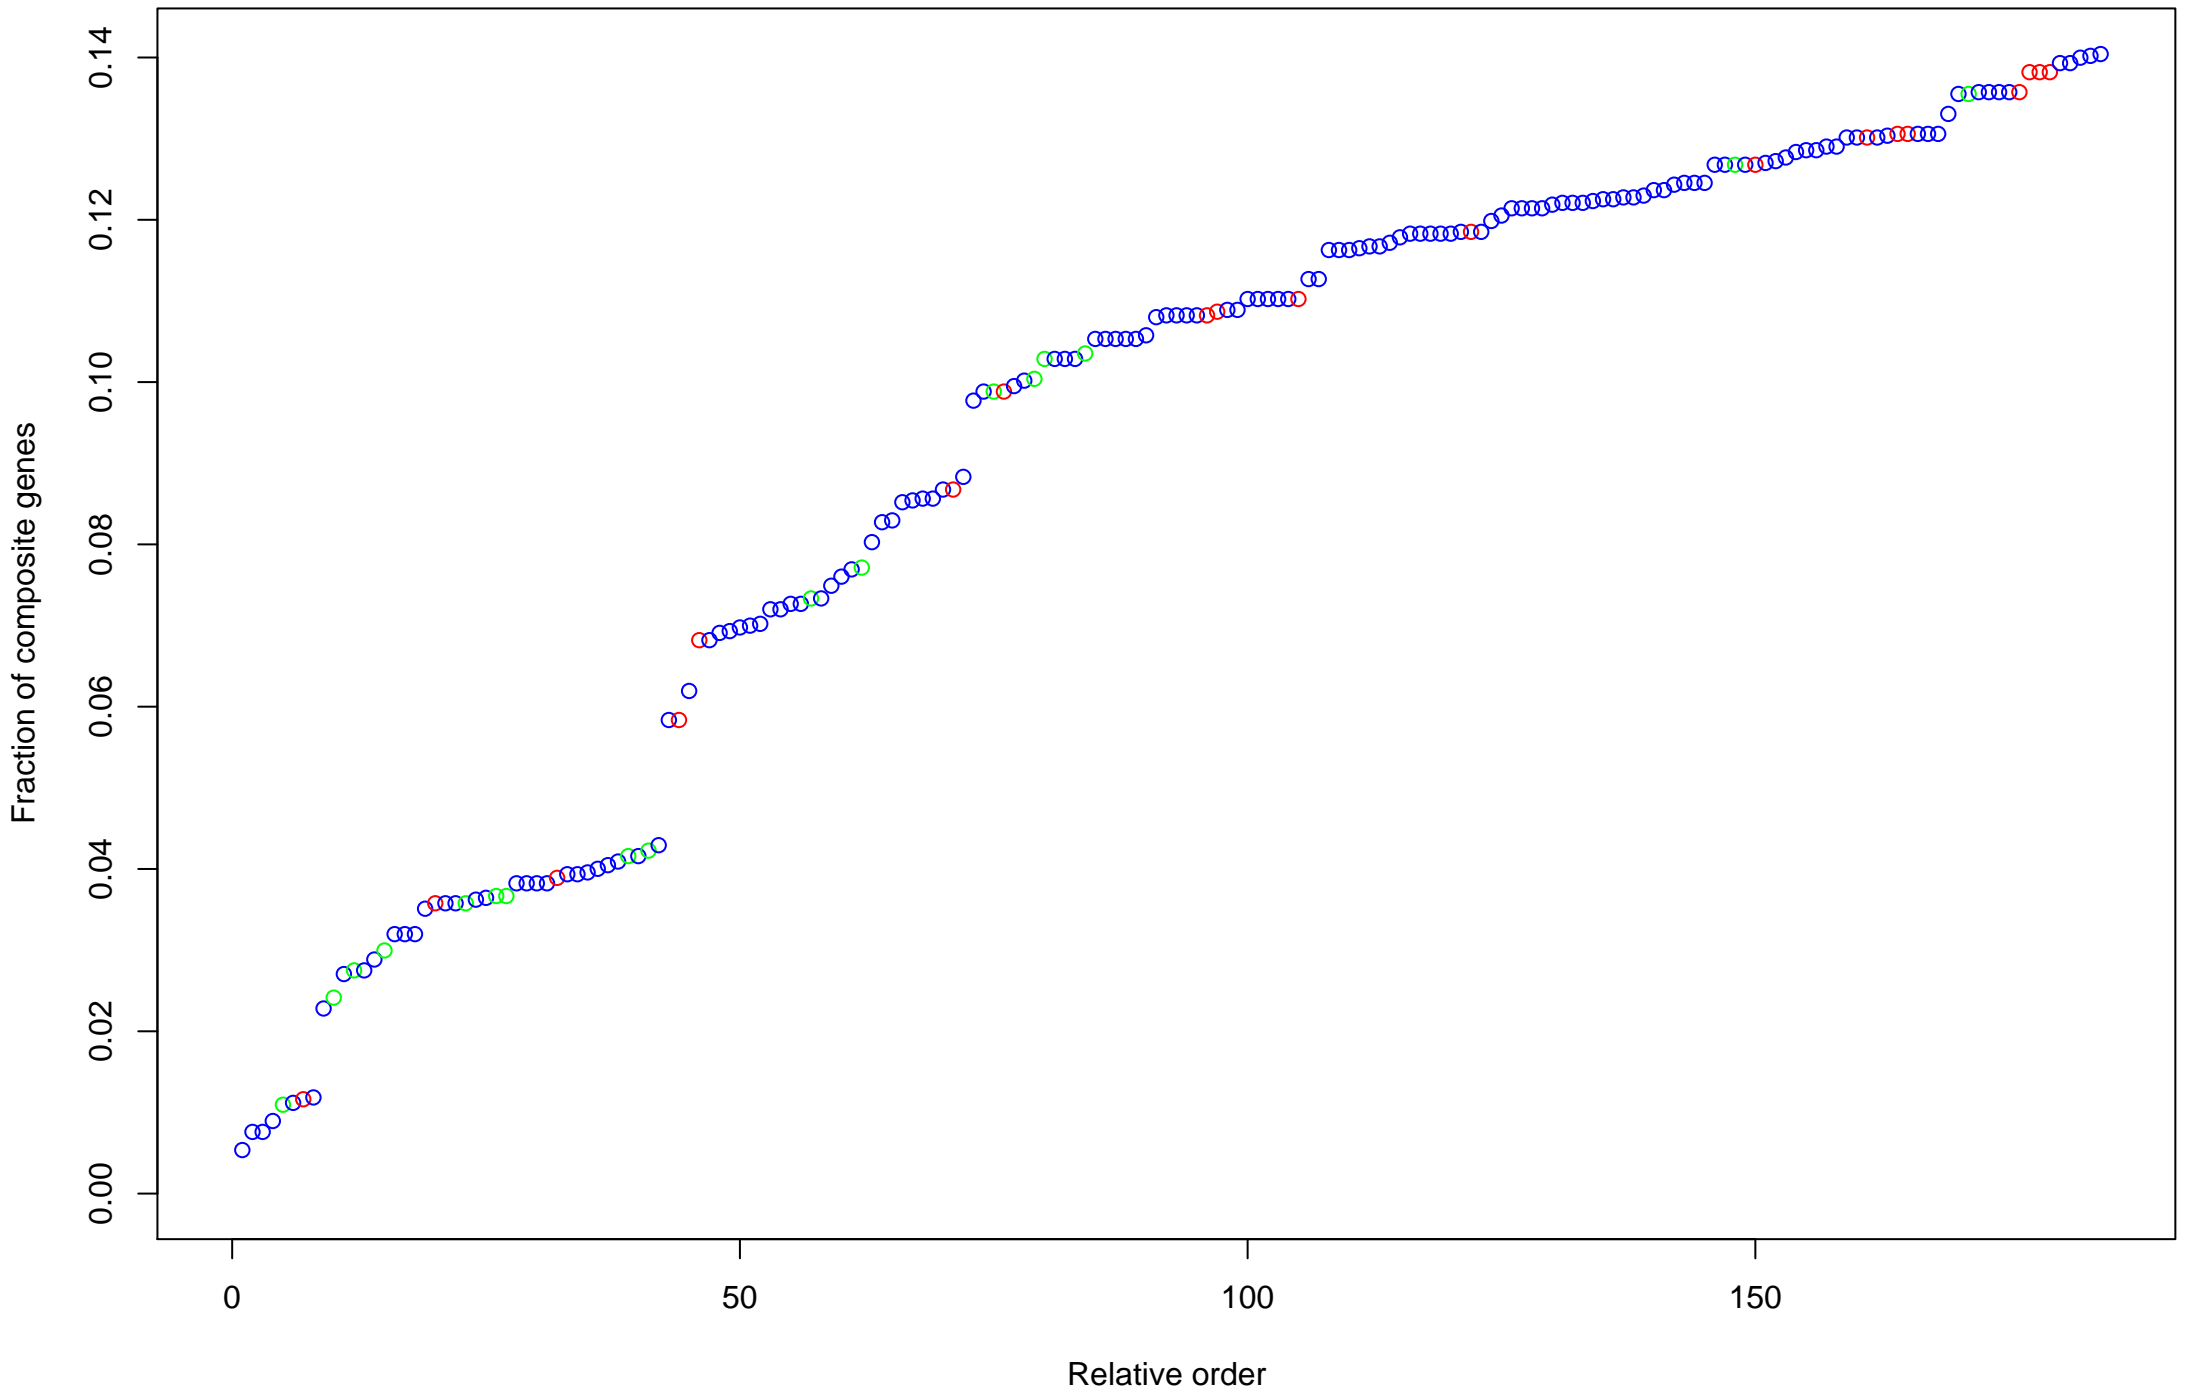

# PACN-202-01 (*Propionibacterium acnes*)

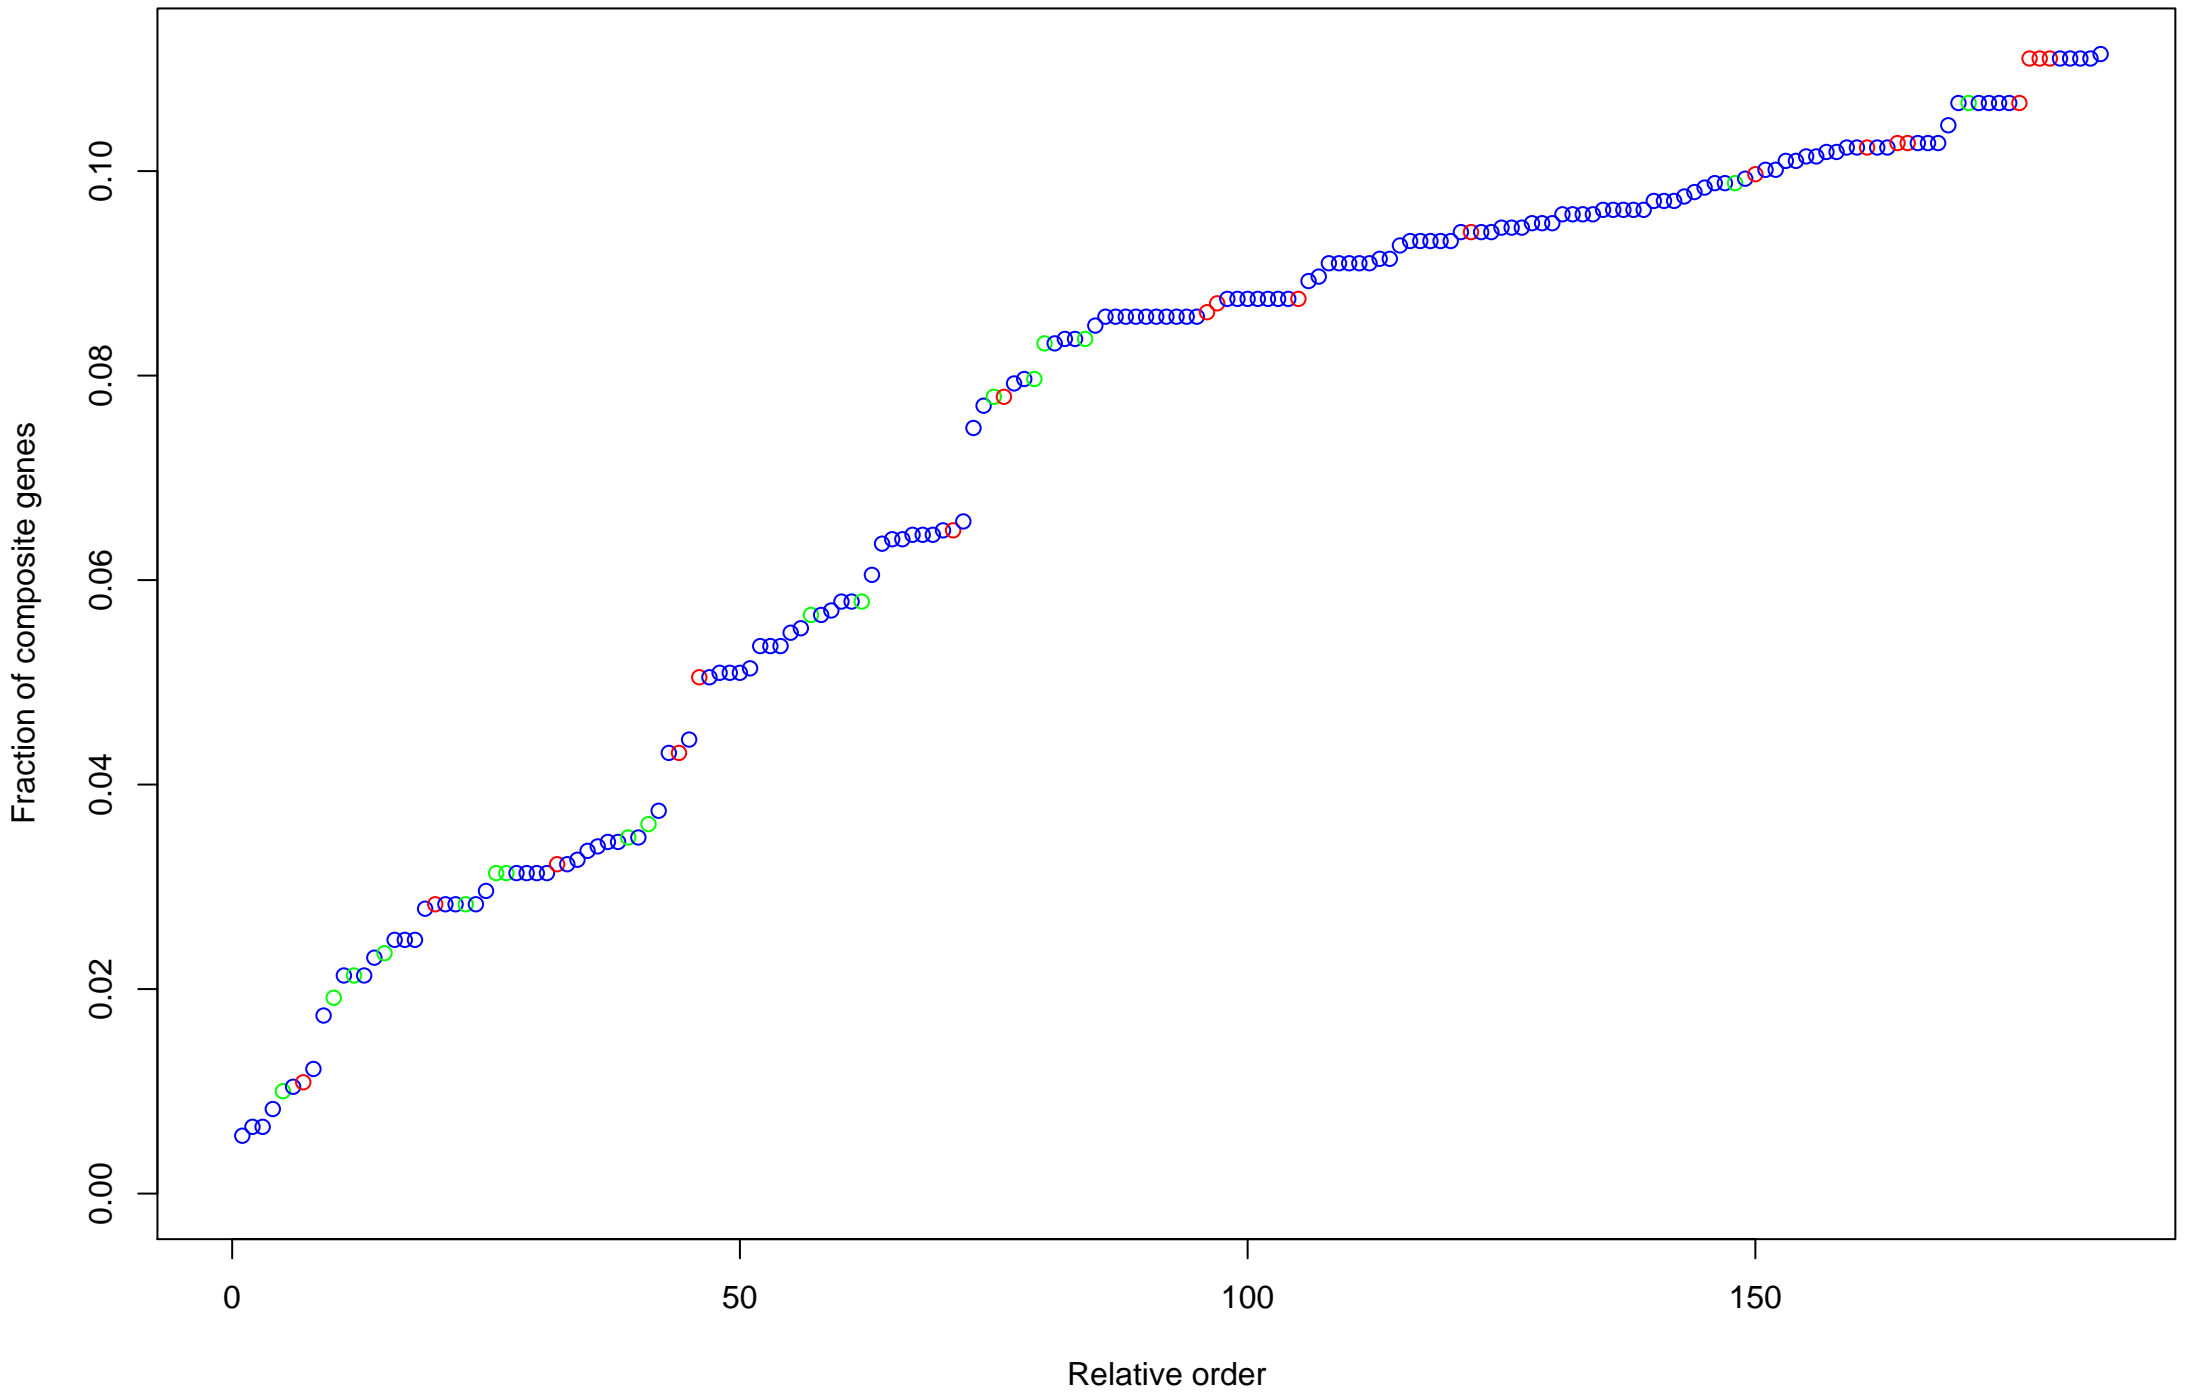

# MMOB-63K-01 (*Mycoplasma mobile*)

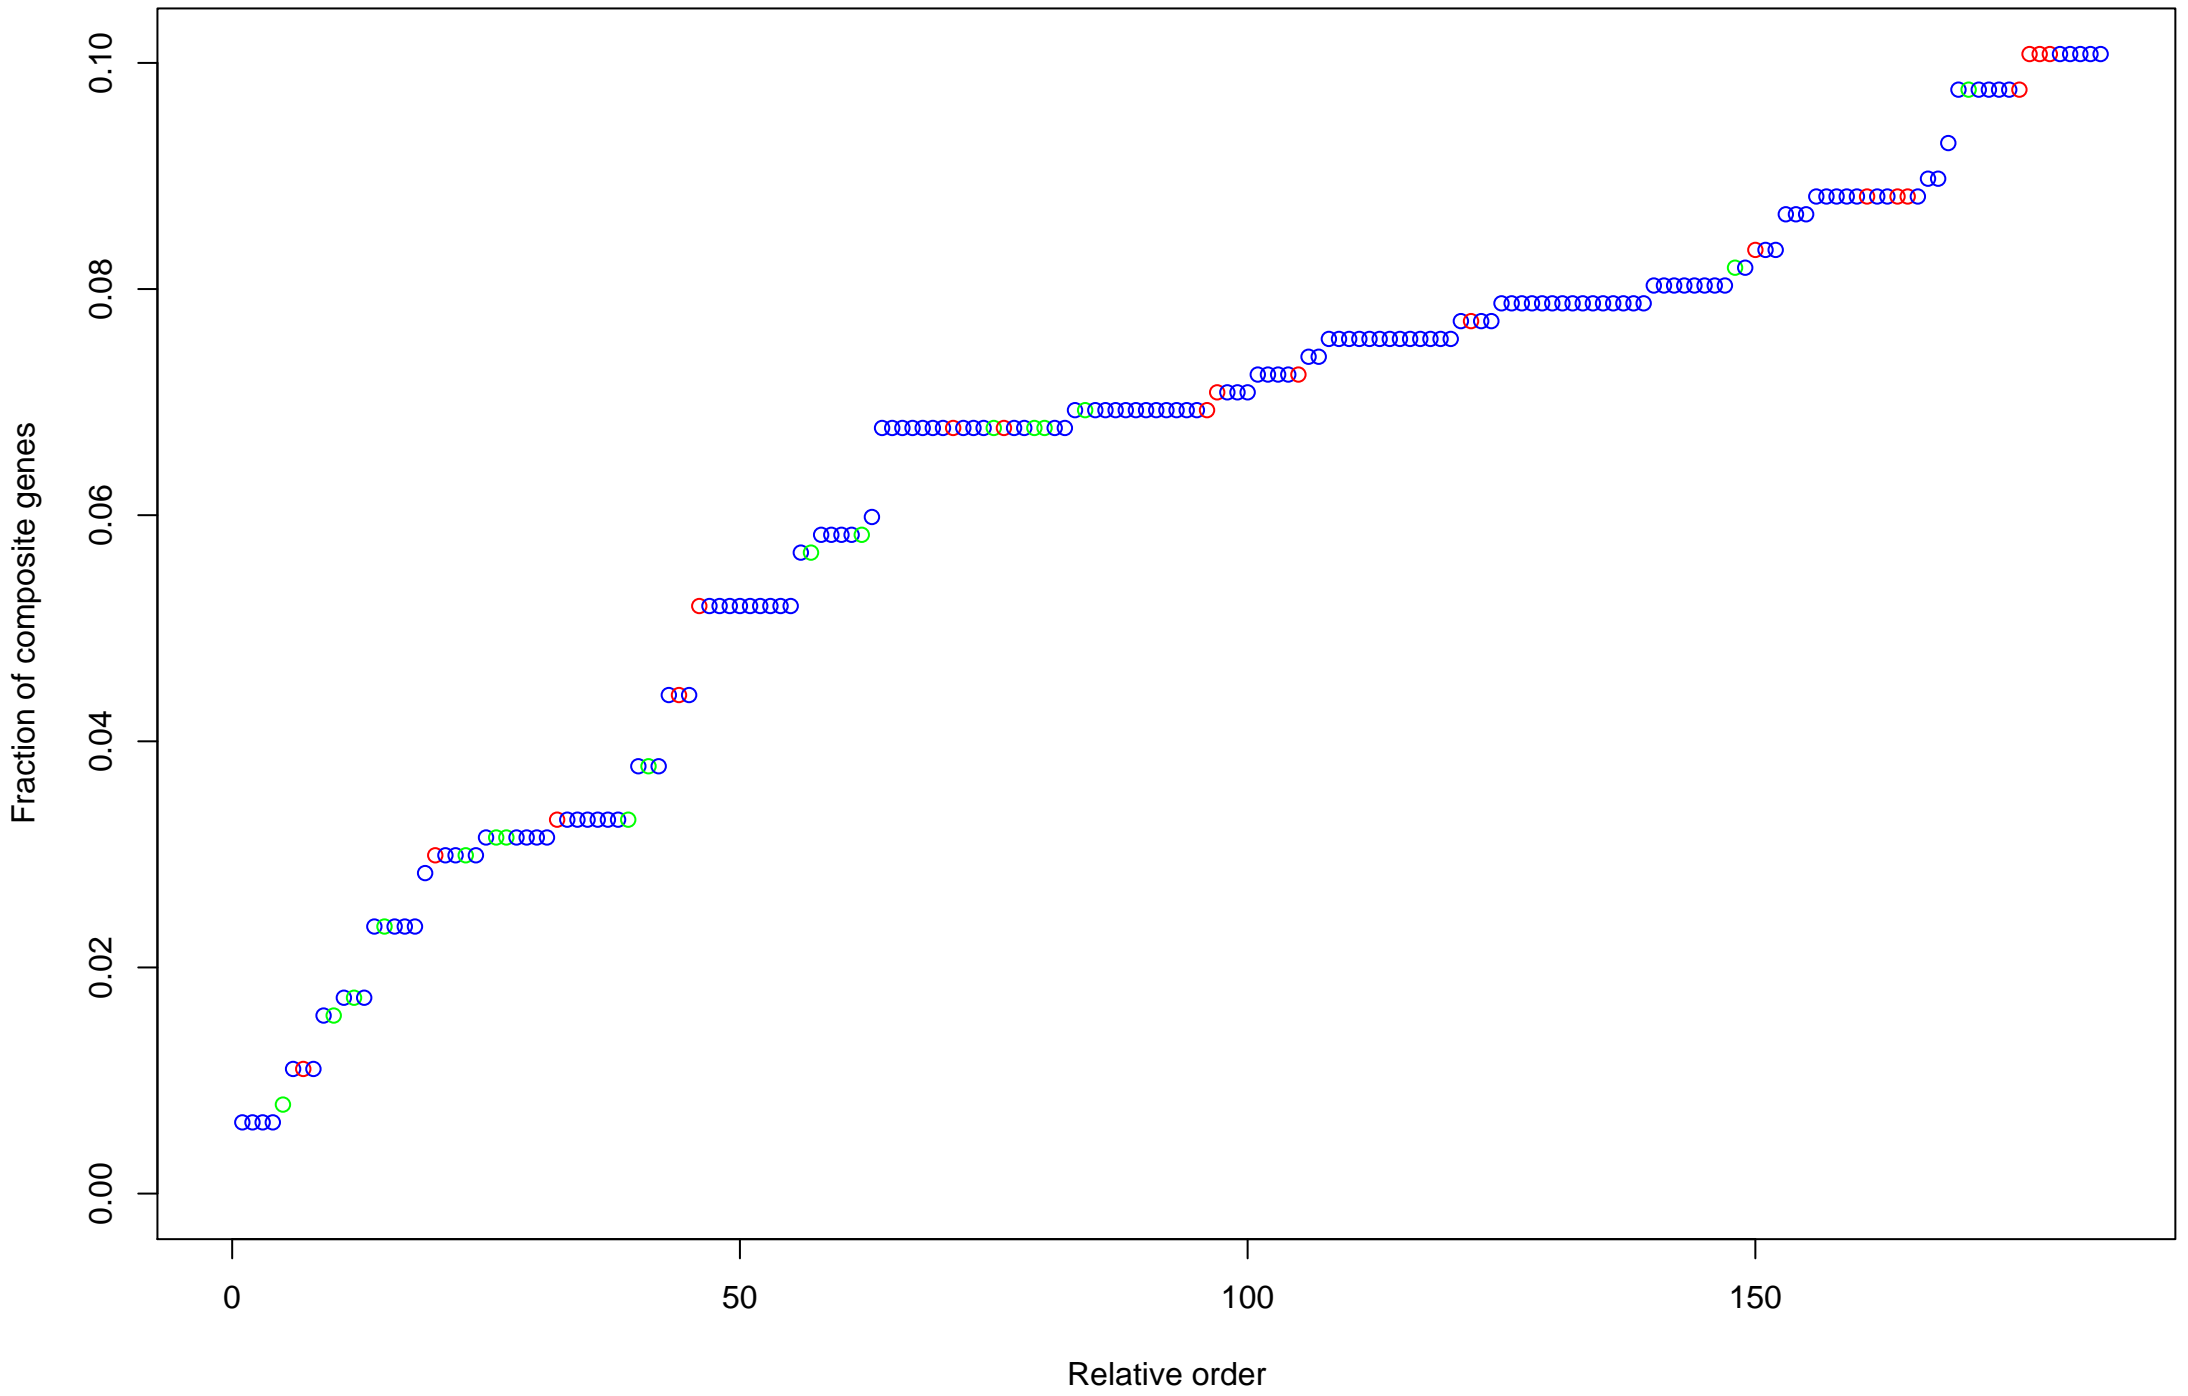

# SPYO-394-01 (*Streptococcus pyogenes*)

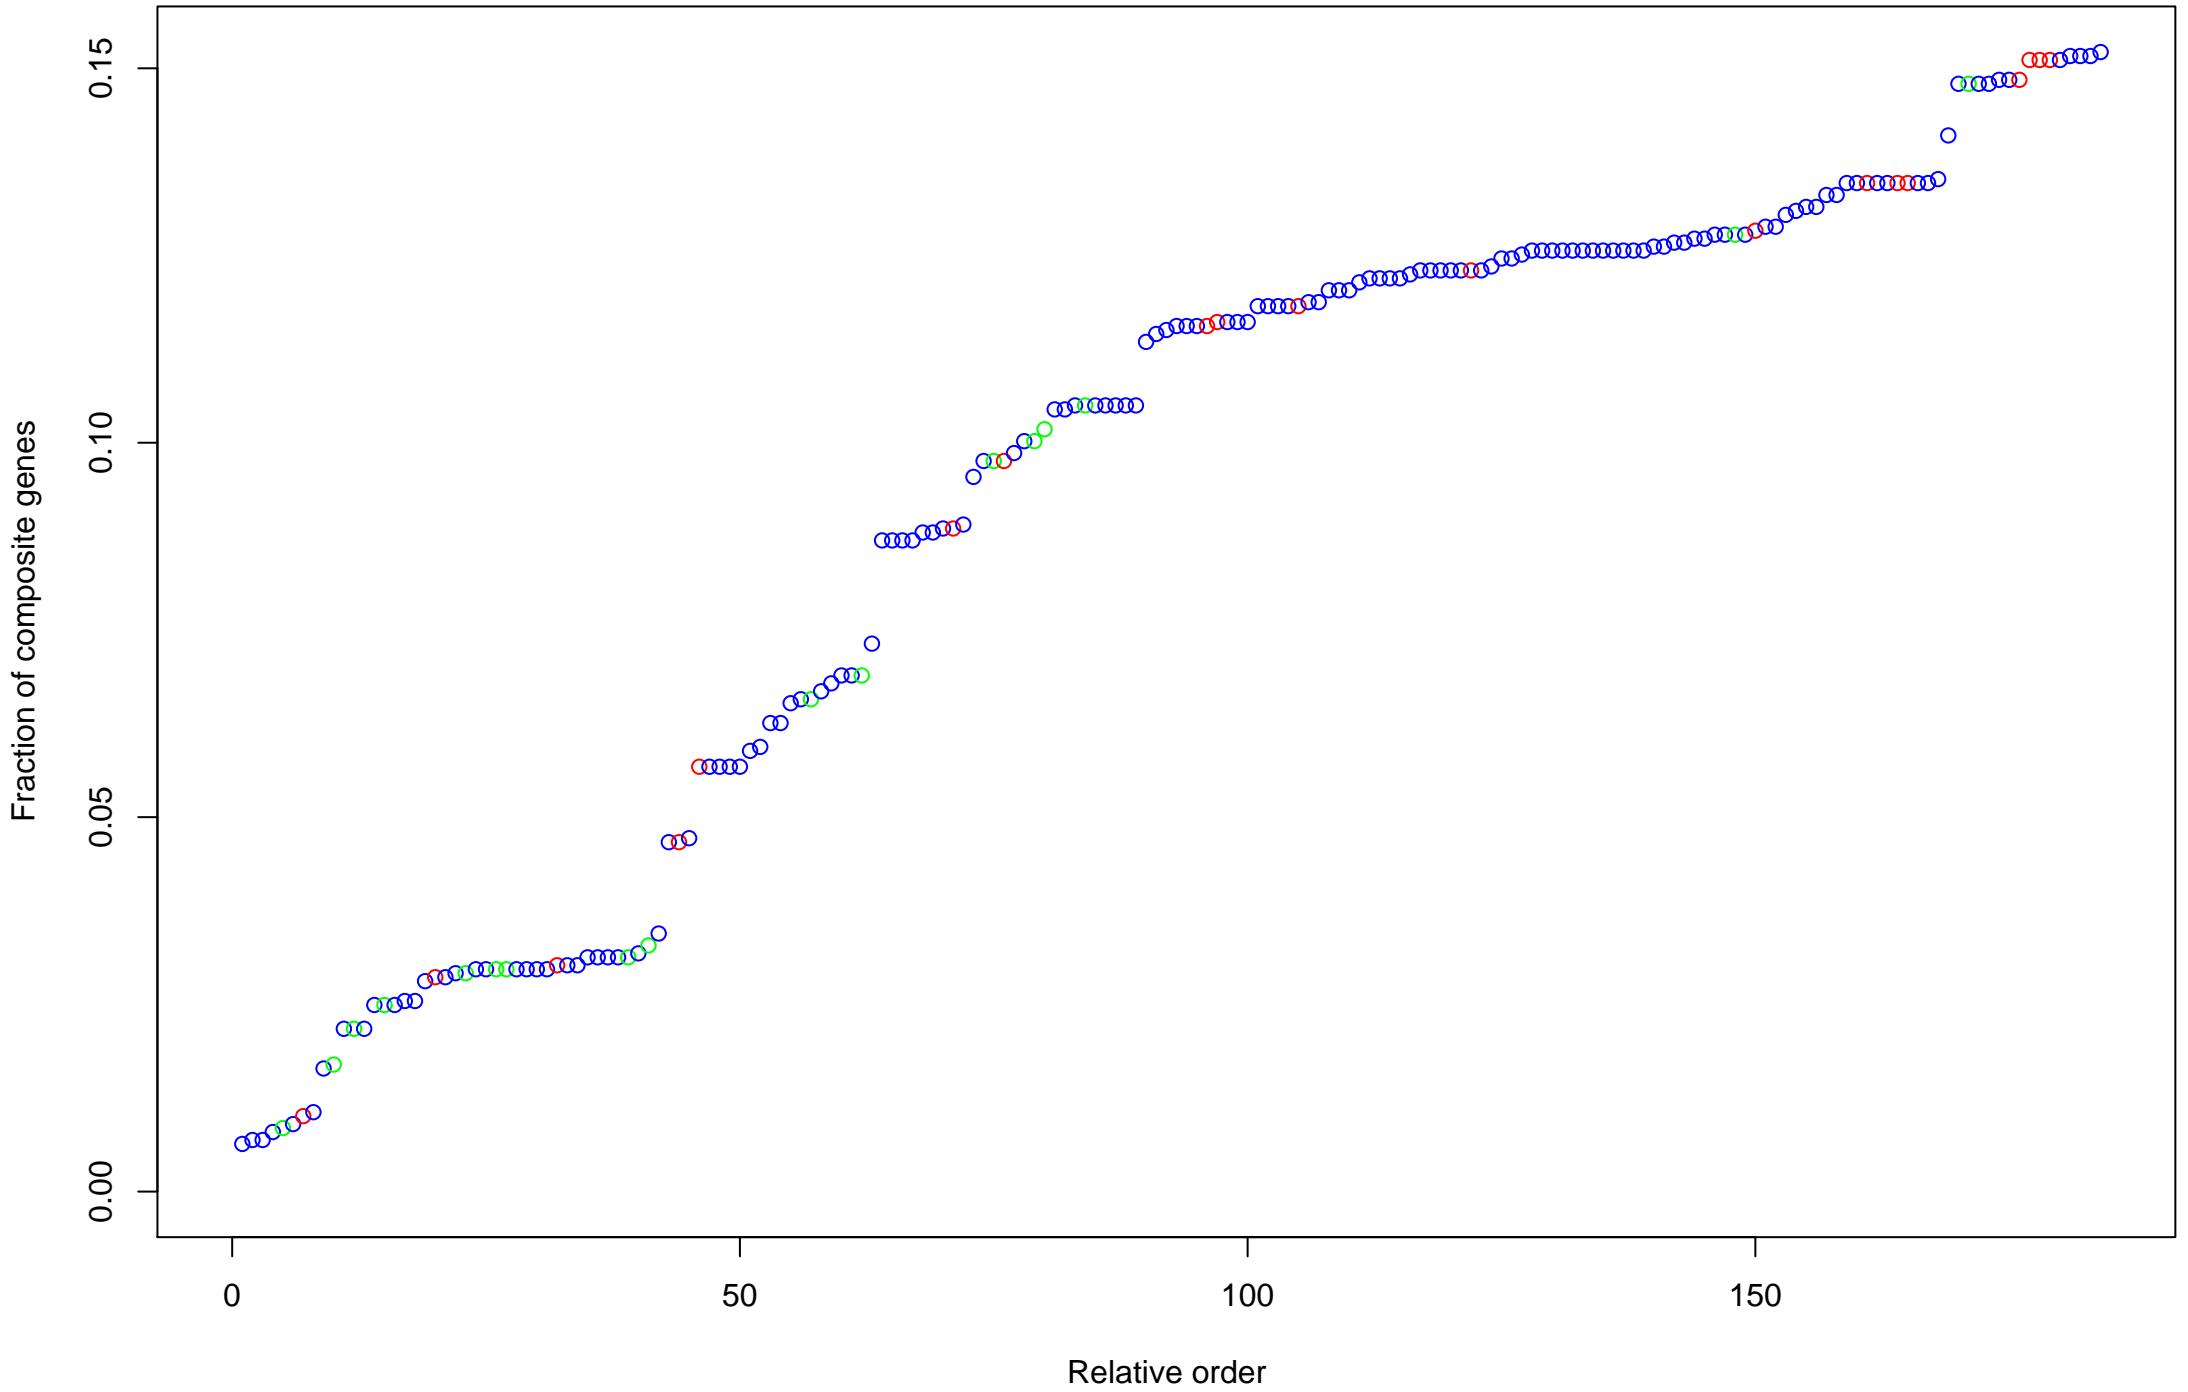

LXYL-B07-01 (*Leifsonia xyli* subsp. *xyli*)

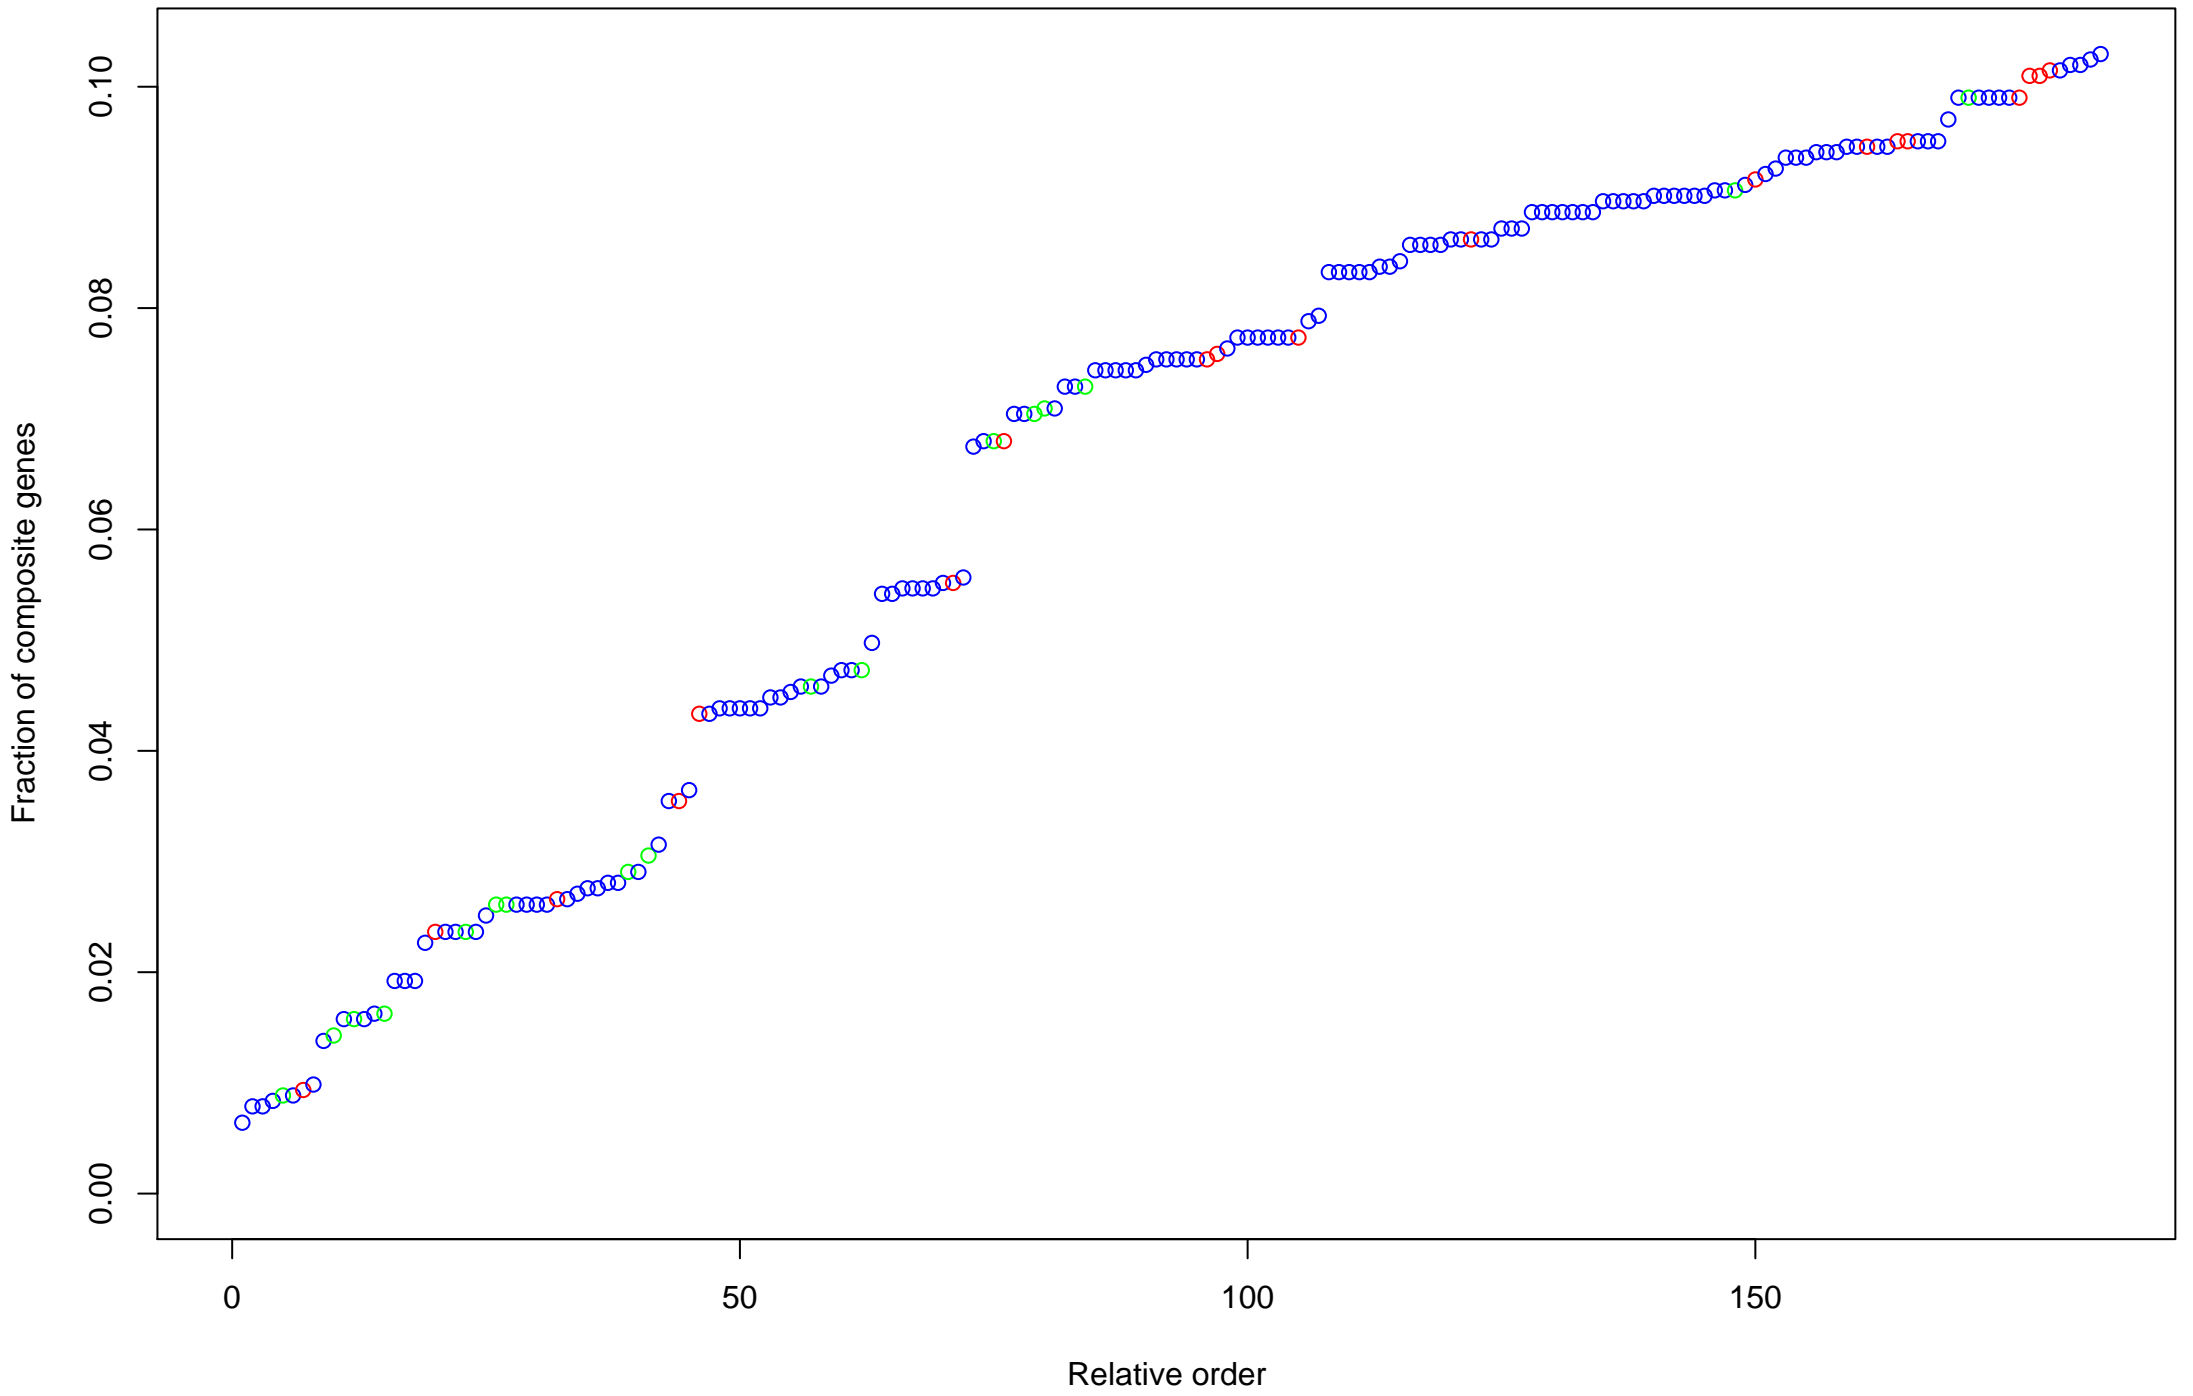

# RTYP-144-01 (*Rickettsia typhi*)

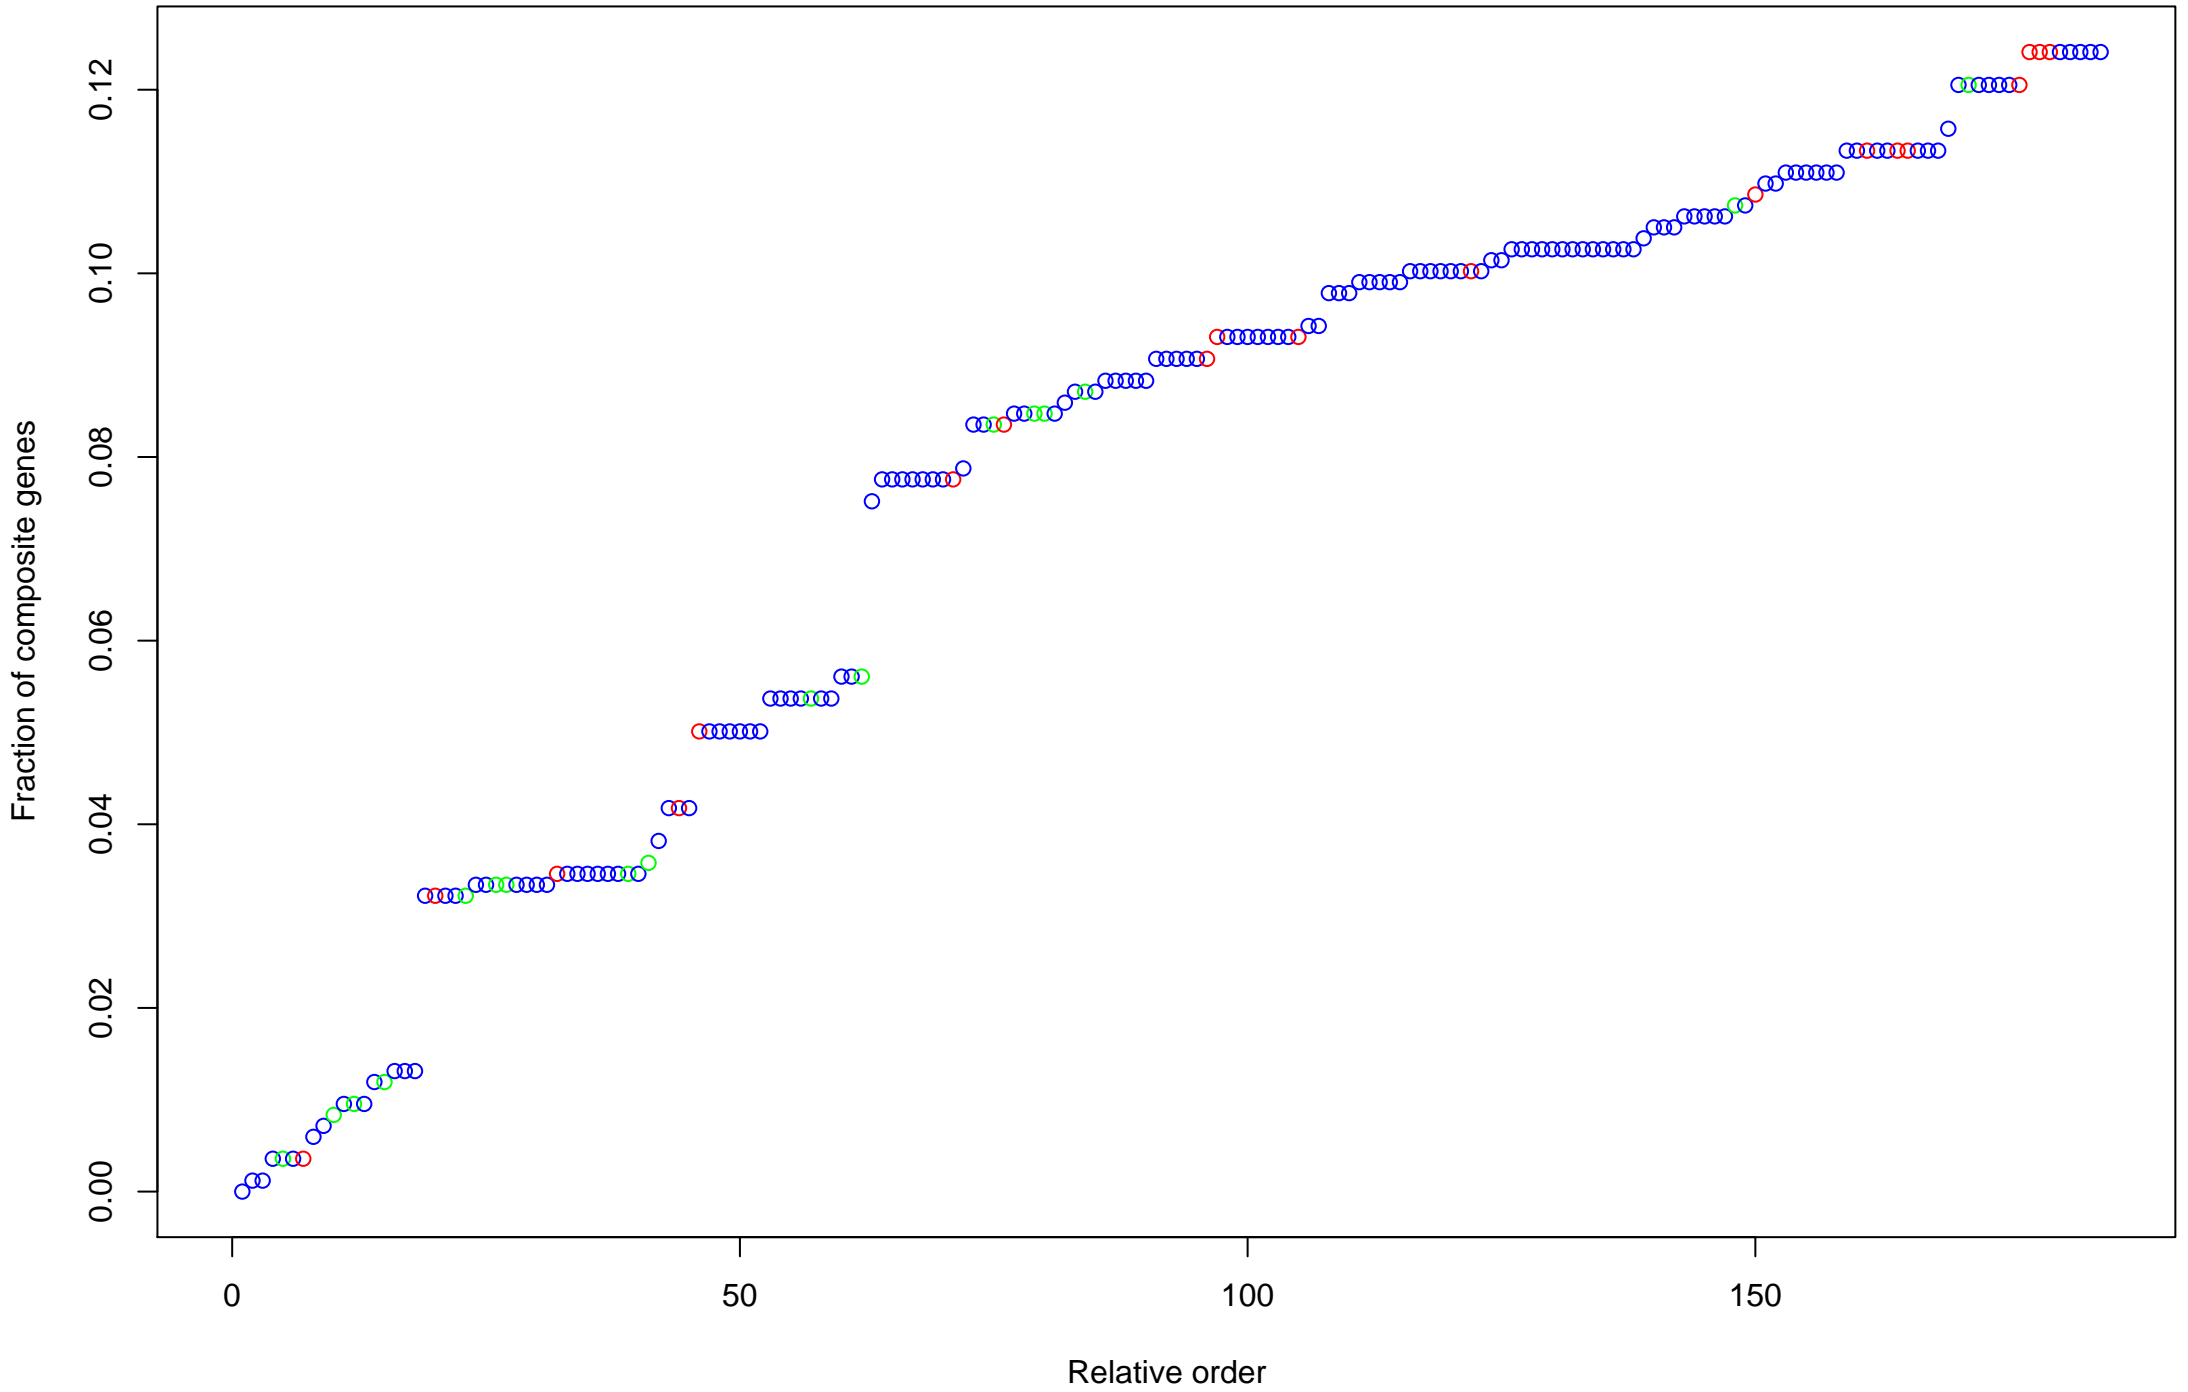

Supplement: 1471-2164-8-460-S4.pdf [file 1471-2164-8-460-S4.pdf]
