# Supplementary material for: Denoising inferred functional association networks obtained by gene fusion analysis
Source: PubMed Central journal article supplement (PMC2248599; doi:10.1186/1471-2164-8-460), 2007-12-14

a)

Fraction of distinct components VS fraction of composite proteins

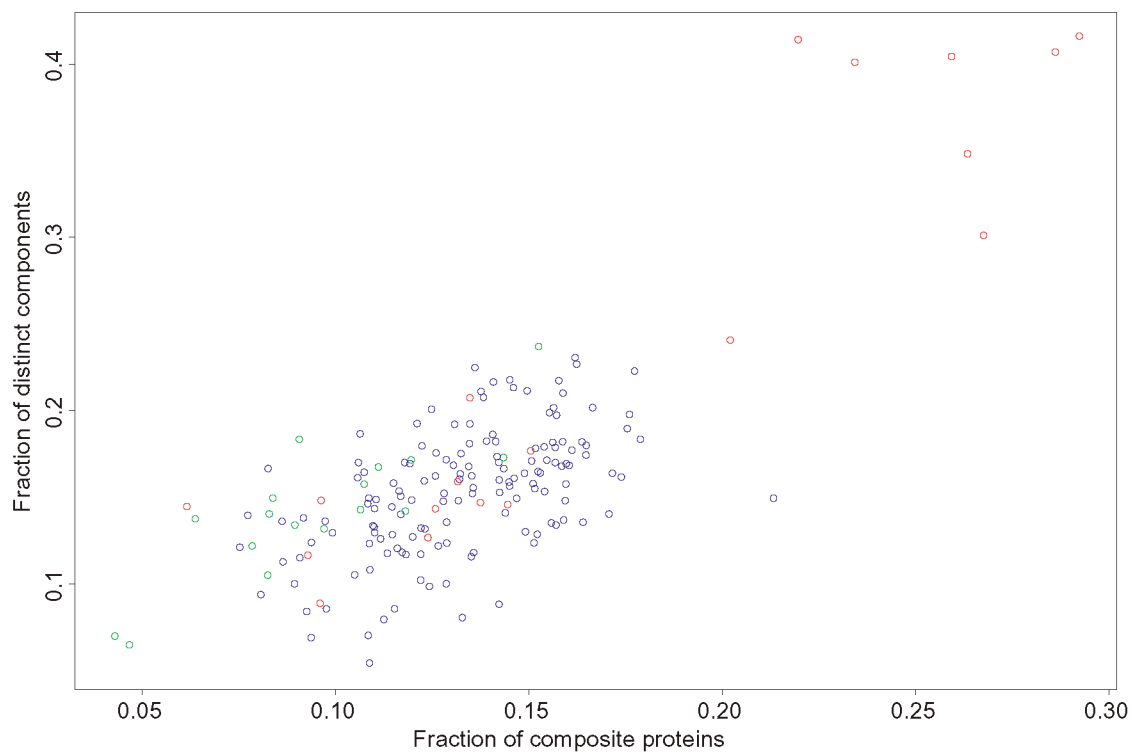

b)

Distribution of fraction of distinct interacting proteins among species (green=A, blue=B, red=E, grey=all)

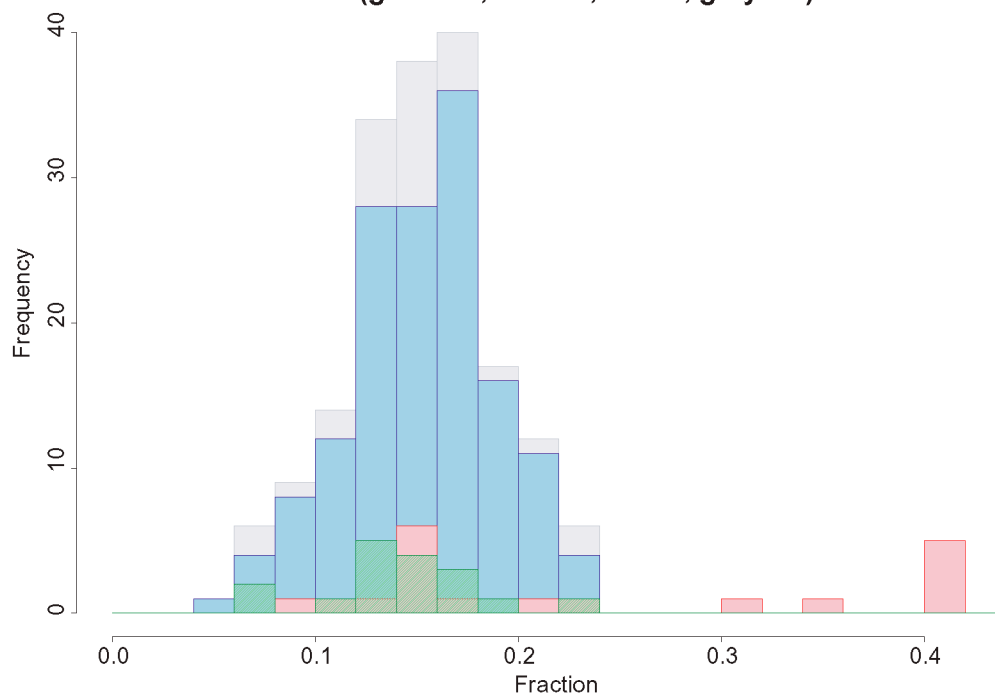

Supplement: 1471-2164-8-460-S2.pdf [file 1471-2164-8-460-S2.pdf]
