# Supplementary material for: Denoising inferred functional association networks obtained by gene fusion analysis
Source: PubMed Central journal article supplement (PMC2248599; doi:10.1186/1471-2164-8-460), 2007-12-14

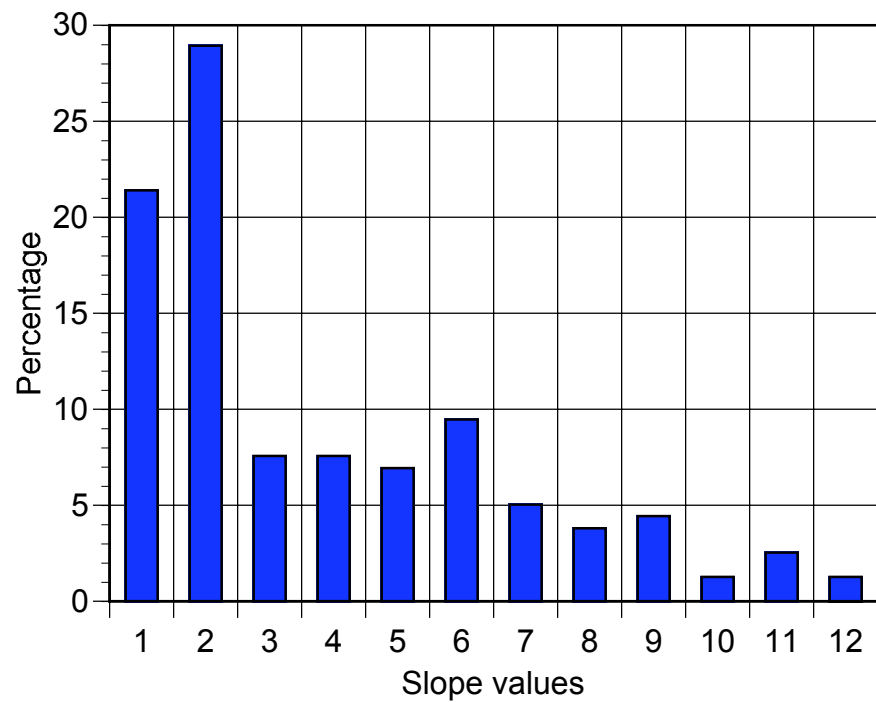

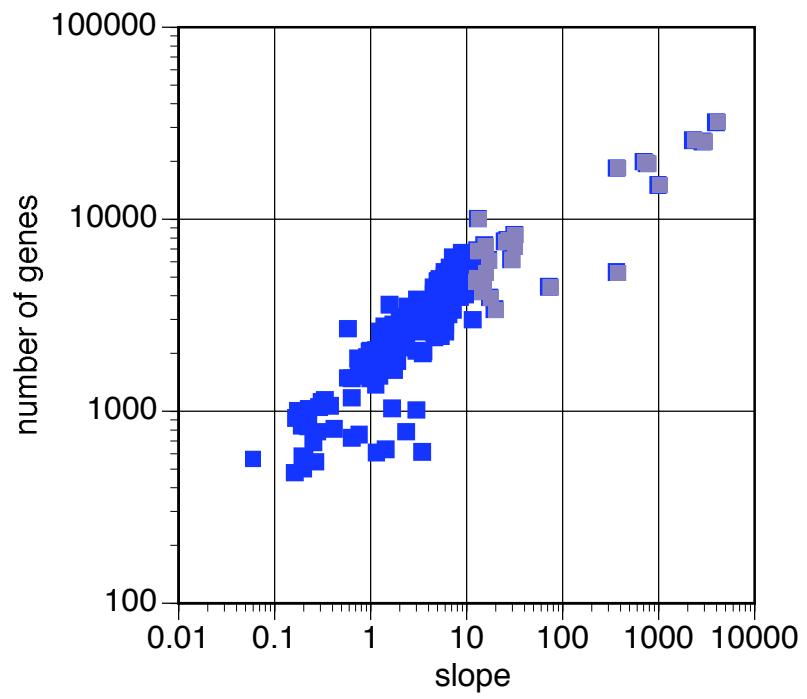

Supplement: 1471-2164-8-460-S3.pdf [file 1471-2164-8-460-S3.pdf]
